# Supplementary material for: The clinical practice guideline for the management of ARDS in Japan
Source: PubMed Central journal article supplement (PMC5526253; doi:10.1186/s40560-017-0222-3), 2017-07-25
Supplement: 40560_2017_222_MOESM1_ESM.pdf [file 40560_2017_222_MOESM1_ESM.pdf]

## CQ01. Study flow diagram

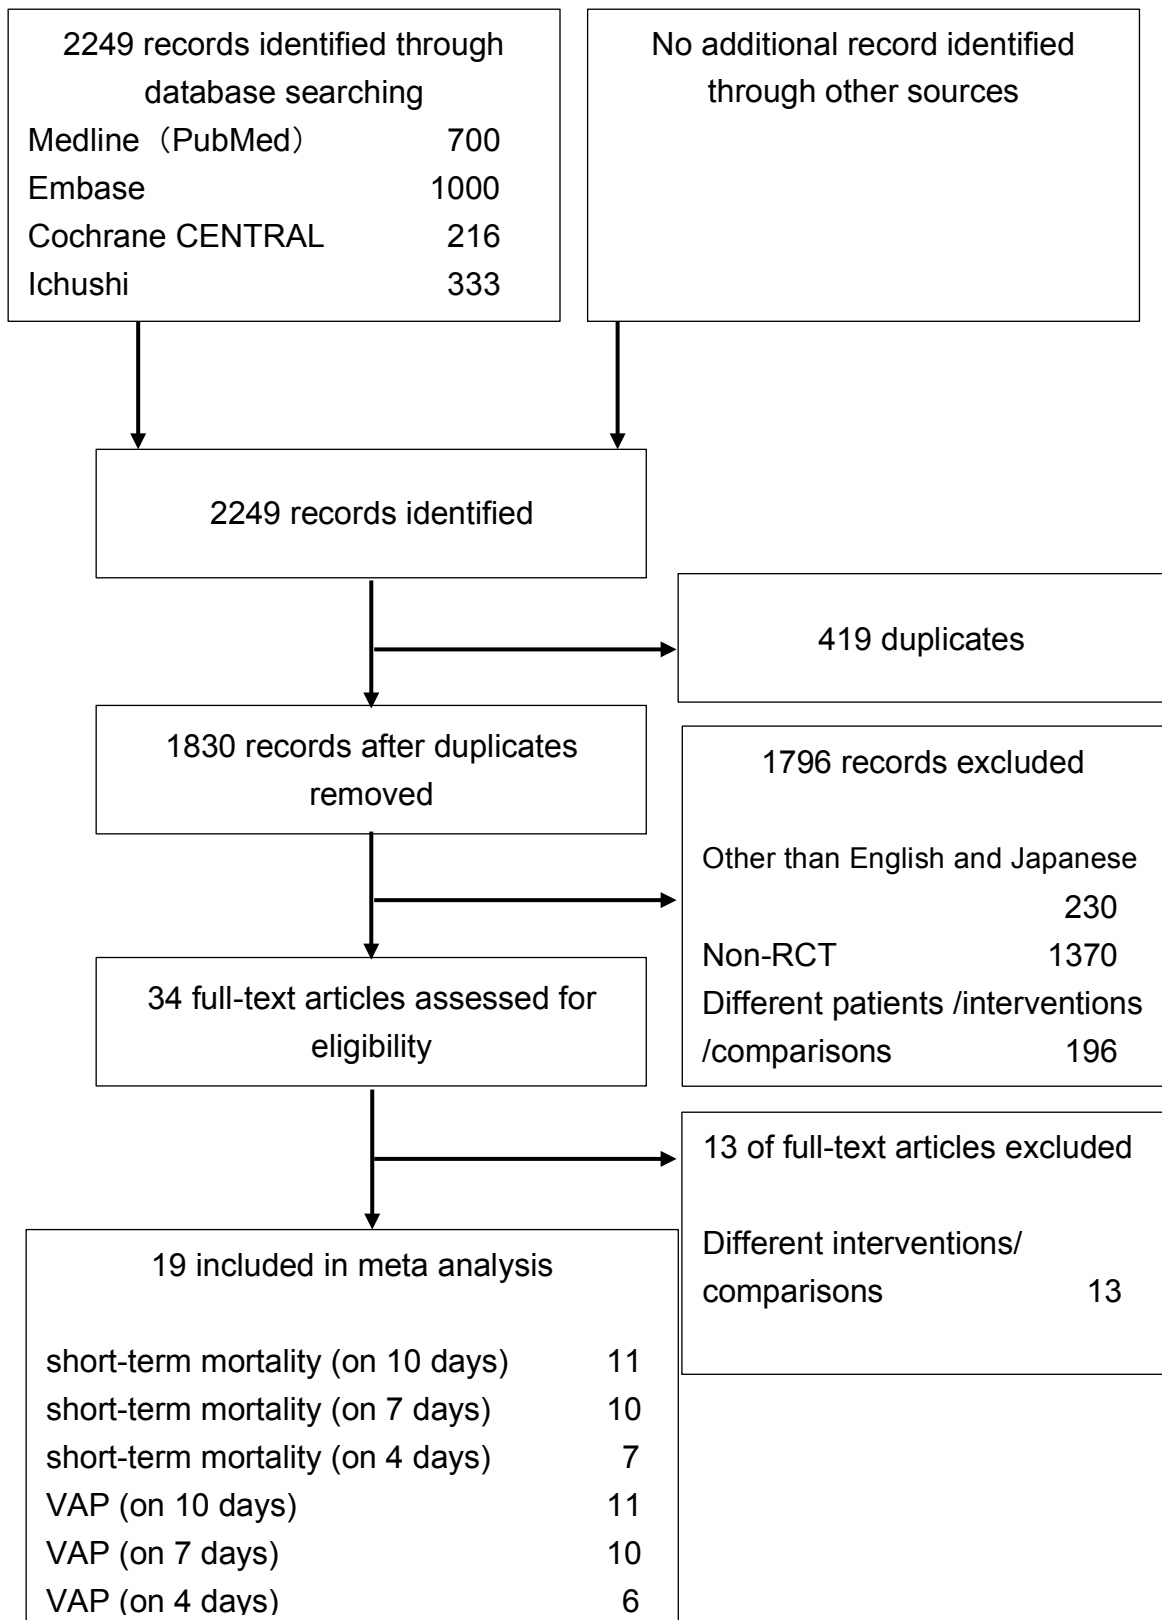

| Outcome |                            | Short term mortality                      |                                    | risk of bias                              |                               | serious (-1)                            |                                              |                                   |                                              |
|---------|----------------------------|-------------------------------------------|------------------------------------|-------------------------------------------|-------------------------------|-----------------------------------------|----------------------------------------------|-----------------------------------|----------------------------------------------|
| 番号      | 著者名 発表年<br>(Forest plot表示) | risk of bias評価                            |                                    |                                           |                               |                                         |                                              |                                   |                                              |
|         |                            | ランダム割付順序の生成<br>random sequence generation | 割り付けの隠蔽化<br>allocation concealment | ブラインド<br>blinding                         |                               | 不完全なアウトカムデータ<br>incomplete outcome data | 選択されたアウトカムの報告<br>selective outcome reporting | その他のバイアス<br>Other sources of bias | 研究内でのバイアスのリスク<br>Risk of bias within a study |
|         |                            |                                           |                                    | 研究参加者と治療提供者<br>participants and personnel | アウトカム評価者<br>outcome assessors |                                         |                                              |                                   |                                              |
| 1       | Braquist 2006              | Low risk                                  | Low risk                           | Unclear risk                              | Low risk                      | Low risk                                | Unclear risk                                 | Unclear risk                      | Low risk                                     |
| 2       | Blot 2008                  | Low risk                                  | Low risk                           | High risk                                 | Low risk                      | Low risk                                | Unclear risk                                 | Low risk                          | Unclear risk                                 |
| 3       | Bosel 2013                 | Low risk                                  | Low risk                           | High risk                                 | Low risk                      | Low risk                                | Low risk                                     | High risk                         | High risk                                    |
| 4       | Bouderka 2004              | Low risk                                  | Unclear risk                       | Unclear risk                              | Low risk                      | Low risk                                | Unclear risk                                 | Unclear risk                      | Unclear risk                                 |
| 5       | Diaz-Prieto 2014           | Low risk                                  | Low risk                           | Unclear risk                              | Low risk                      | Low risk                                | Low risk                                     | Low risk                          | Low risk                                     |
| 6       | Dunham 2014                | Unclear risk                              | Unclear risk                       | Unclear risk                              | Low risk                      | High risk                               | Unclear risk                                 | High risk                         | High risk                                    |
| 7       | Fayed 2013                 | Unclear risk                              | Unclear risk                       | Unclear risk                              | Low risk                      | Unclear risk                            | Unclear risk                                 | High risk                         | High risk                                    |
| 8       | Koch 2012                  | Low risk                                  | Low risk                           | Unclear risk                              | Low risk                      | Low risk                                | High risk                                    | Low risk                          | Low risk                                     |
| 9       | Mohamed 2014               | Unclear risk                              | Unclear risk                       | High risk                                 | Low risk                      | Low risk                                | Unclear risk                                 | Unclear risk                      | Unclear risk                                 |
| 10      | Rodriguez 1990             | High risk                                 | High risk                          | Unclear risk                              | Low risk                      | Unclear risk                            | Unclear risk                                 | Unclear risk                      | High risk                                    |
| 11      | Rumbak 2004                | Unclear risk                              | Low risk                           | Unclear risk                              | Low risk                      | Low risk                                | Unclear risk                                 | Unclear risk                      | Unclear risk                                 |
| 12      | Saffle 2002                | Low risk                                  | Low risk                           | Unclear risk                              | Low risk                      | Low risk                                | Unclear risk                                 | Unclear risk                      | Low risk                                     |
| 14      | Sugerman 1997              | Low risk                                  | Low risk                           | Unclear risk                              | Low risk                      | High risk                               | Unclear risk                                 | High risk                         | High risk                                    |
| 15      | Terragni 2010              | Low risk                                  | Low risk                           | Unclear risk                              | Low risk                      | Low risk                                | High risk                                    | Low risk                          | Low risk                                     |
| 16      | Trouillet 2011             | Low risk                                  | Low risk                           | Unclear risk                              | Low risk                      | Low risk                                | Low risk                                     | Low risk                          | Low risk                                     |
| 17      | Young 2013                 | Low risk                                  | Low risk                           | High risk                                 | Low risk                      | Low risk                                | Low risk                                     | Low risk                          | Low risk                                     |
| 18      | Zheng 2012                 | Low risk                                  | Low risk                           | Unclear risk                              | Low risk                      | Low risk                                | Unclear risk                                 | Low risk                          | Low risk                                     |

| Outcome |                            | VAP                                              |                                       | risk of bias                                     |                               | serious (-1)                                   |                                                     |                                      |                                                     |
|---------|----------------------------|--------------------------------------------------|---------------------------------------|--------------------------------------------------|-------------------------------|------------------------------------------------|-----------------------------------------------------|--------------------------------------|-----------------------------------------------------|
| 番号      | 著者名 発表年<br>(Forest plot表示) | risk of bias評価                                   |                                       |                                                  |                               |                                                |                                                     |                                      |                                                     |
|         |                            | ランダム割付順序の<br>生成<br>random sequence<br>generation | 割り付けの隠蔽化<br>allocation<br>concealment | ブラインド<br>blinding                                |                               | 不完全なアウトカム<br>データ<br>incomplete outcome<br>data | 選択されたアウトカム<br>の報告<br>selective outcome<br>reporting | その他のバイアス<br>Other sources of<br>bias | 研究内でのバイアス<br>のリスク<br>Risk of bias within a<br>study |
|         |                            |                                                  |                                       | 研究参加者と治療提<br>供者<br>participants and<br>personnel | アウトカム評価者<br>outcome assessors |                                                |                                                     |                                      |                                                     |
| 1       | Braquist 2006              | Low risk                                         | Low risk                              | Unclear risk                                     | Unclear risk                  | Low risk                                       | Unclear risk                                        | Unclear risk                         | Unclear risk                                        |
| 2       | Blot 2008                  | Low risk                                         | Low risk                              | High risk                                        | Low risk                      | Low risk                                       | Unclear risk                                        | Low risk                             | Unclear risk                                        |
| 3       | Bouderka 2004              | Low risk                                         | Unclear risk                          | Unclear risk                                     | Unclear risk                  | Low risk                                       | Unclear risk                                        | Unclear risk                         | Unclear risk                                        |
| 4       | Bylappa 2011               | Unclear risk                                     | Unclear risk                          | Unclear risk                                     | Unclear risk                  | Low risk                                       | Unclear risk                                        | Unclear risk                         | Unclear risk                                        |
| 5       | Diaz-Prieto 2014           | Low risk                                         | Low risk                              | Unclear risk                                     | Unclear risk                  | Low risk                                       | Low risk                                            | Low risk                             | Low risk                                            |
| 6       | Dunham 1984                | High risk                                        | High risk                             | Unclear risk                                     | Unclear risk                  | Low risk                                       | Unclear risk                                        | Unclear risk                         | High risk                                           |
| 7       | Dunham 2014                | Unclear risk                                     | Unclear risk                          | Unclear risk                                     | Unclear risk                  | High risk                                      | Unclear risk                                        | High risk                            | High risk                                           |
| 8       | Fayed 2013                 | Unclear risk                                     | Unclear risk                          | Unclear risk                                     | Unclear risk                  | Low risk                                       | Unclear risk                                        | High risk                            | High risk                                           |
| 9       | Koch 2012                  | Low risk                                         | Low risk                              | Unclear risk                                     | Low risk                      | Low risk                                       | High risk                                           | Low risk                             | Unclear risk                                        |
| 10      | Mohamed 2014               | Unclear risk                                     | Unclear risk                          | High risk                                        | High risk                     | Low risk                                       | Unclear risk                                        | Unclear risk                         | High risk                                           |
| 11      | Rodriguez 1990             | High risk                                        | High risk                             | Unclear risk                                     | Unclear risk                  | Unclear risk                                   | Unclear risk                                        | Unclear risk                         | High risk                                           |
| 12      | Rumbak 2004                | Unclear risk                                     | Low risk                              | Unclear risk                                     | Unclear risk                  | Low risk                                       | Unclear risk                                        | Unclear risk                         | Unclear risk                                        |
| 13      | Saffle 2002                | Low risk                                         | Low risk                              | Unclear risk                                     | Unclear risk                  | Low risk                                       | Unclear risk                                        | Unclear risk                         | Unclear risk                                        |
| 14      | Sugerman 1997              | Low risk                                         | Low risk                              | Unclear risk                                     | Unclear risk                  | High risk                                      | Unclear risk                                        | High risk                            | High risk                                           |
| 15      | Terragni 2010              | Low risk                                         | Low risk                              | Unclear risk                                     | Low risk                      | Low risk                                       | High risk                                           | Low risk                             | Low risk                                            |
| 16      | Trouillet 2011             | Low risk                                         | Low risk                              | Unclear risk                                     | Low risk                      | Low risk                                       | Low risk                                            | Low risk                             | Low risk                                            |
| 17      | Zheng 2012                 | Low risk                                         | Low risk                              | Unclear risk                                     | Low risk                      | Low risk                                       | Unclear risk                                        | Low risk                             | Low risk                                            |

## Short term mortality (4 days)

|             | Random sequence generation (selection bias) | Allocation concealment (selection bias) | Blinding of participants and personnel (performance bias) | Blinding of outcome assessment (detection bias) | Incomplete outcome data (attrition bias) | Selective reporting (reporting bias) | Other bias |
|-------------|---------------------------------------------|-----------------------------------------|-----------------------------------------------------------|-------------------------------------------------|------------------------------------------|--------------------------------------|------------|
| Blot 2008   | +                                           | +                                       | -                                                         | +                                               | +                                        | ?                                    | +          |
| Bösel 2013  | +                                           | +                                       | -                                                         | +                                               | +                                        | +                                    | -          |
| Koch 2012   | +                                           | +                                       | ?                                                         | +                                               | +                                        | -                                    | +          |
| Rumbak 2004 | ?                                           | +                                       | ?                                                         | +                                               | +                                        | ?                                    | ?          |
| Saffle 2002 | +                                           | +                                       | ?                                                         | +                                               | +                                        | ?                                    | ?          |
| Young 2013  | +                                           | +                                       | -                                                         | +                                               | +                                        | +                                    | +          |
| Zheng 2012  | +                                           | +                                       | ?                                                         | +                                               | +                                        | ?                                    | +          |

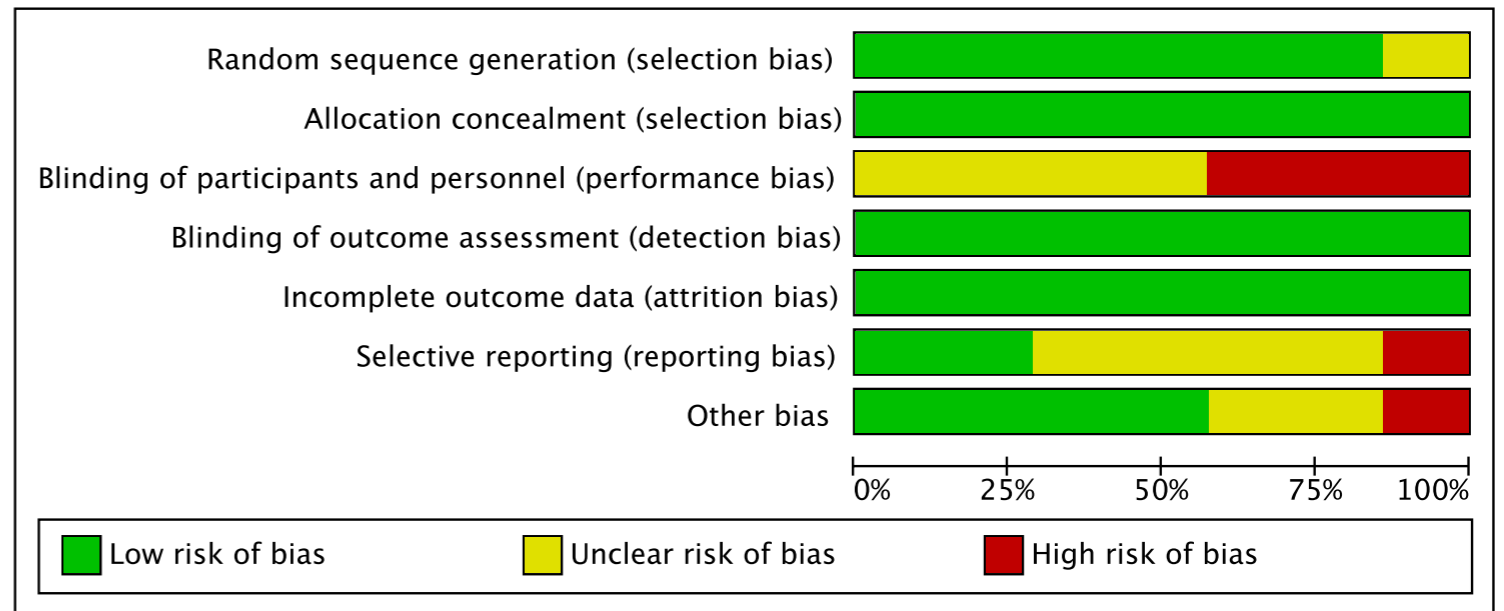



## VAP (4 days)

|             | Random sequence generation (selection bias) | Allocation concealment (selection bias) | Blinding of participants and personnel (performance bias) | Blinding of outcome assessment (detection bias) | Incomplete outcome data (attrition bias) | Selective reporting (reporting bias) | Other bias |
|-------------|---------------------------------------------|-----------------------------------------|-----------------------------------------------------------|-------------------------------------------------|------------------------------------------|--------------------------------------|------------|
| Blot 2008   | +                                           | +                                       | -                                                         | +                                               | +                                        | ?                                    | +          |
| Dunham 1984 | -                                           | -                                       | ?                                                         | ?                                               | +                                        | ?                                    | ?          |
| Koch 2012   | +                                           | +                                       | ?                                                         | +                                               | +                                        | -                                    | +          |
| Rumbak 2004 | ?                                           | +                                       | ?                                                         | ?                                               | +                                        | ?                                    | ?          |
| Saffle 2002 | +                                           | +                                       | ?                                                         | ?                                               | +                                        | ?                                    | ?          |
| Zheng 2012  | +                                           | +                                       | ?                                                         | +                                               | +                                        | ?                                    | +          |

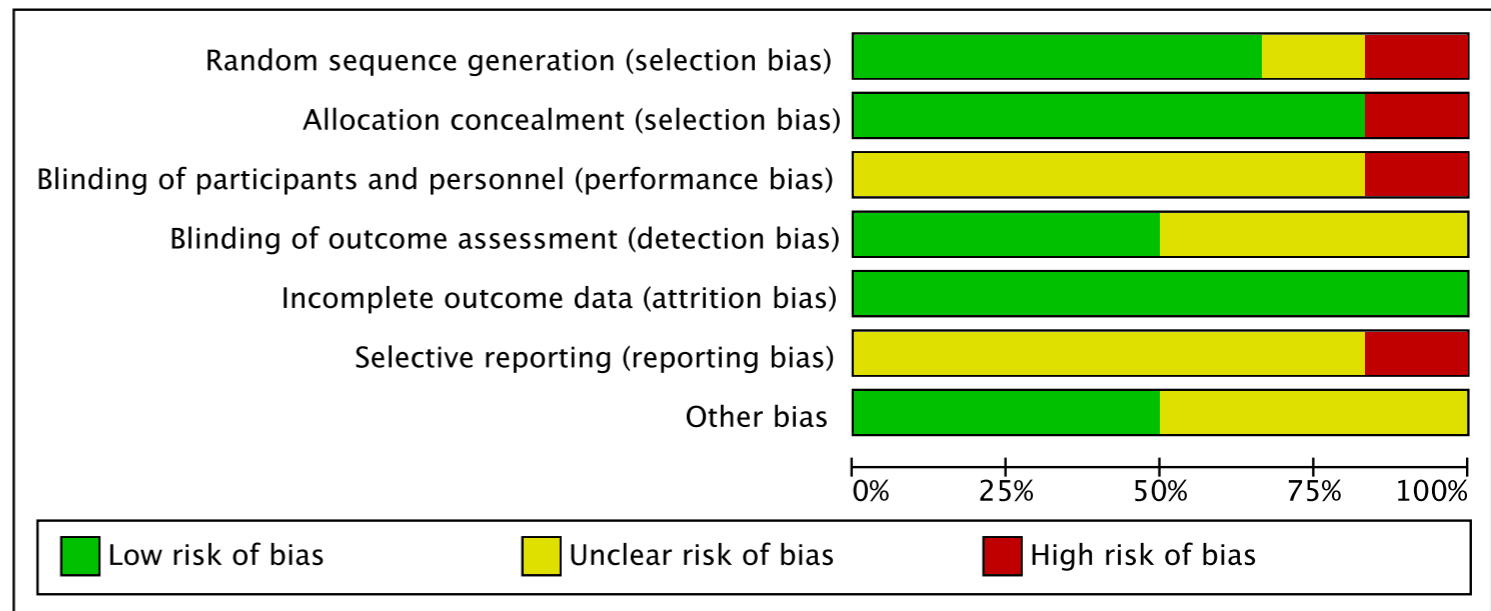

## Short term mortality (7 days)

|                | Random sequence generation (selection bias) | Allocation concealment (selection bias) | Blinding of participants and personnel (performance bias) | Blinding of outcome assessment (detection bias) | Incomplete outcome data (attrition bias) | Selective reporting (reporting bias) | Other bias |
|----------------|---------------------------------------------|-----------------------------------------|-----------------------------------------------------------|-------------------------------------------------|------------------------------------------|--------------------------------------|------------|
| Bösel 2013     | +                                           | +                                       | -                                                         | +                                               | +                                        | +                                    | -          |
| Bouderka 2004  | +                                           | ?                                       | ?                                                         | +                                               | +                                        | ?                                    | ?          |
| Dunham 2014    | ?                                           | ?                                       | ?                                                         | +                                               | -                                        | ?                                    | -          |
| Rodriguez 1990 | -                                           | -                                       | ?                                                         | +                                               | ?                                        | ?                                    | ?          |
| Rumbak 2004    | ?                                           | +                                       | ?                                                         | +                                               | +                                        | ?                                    | ?          |
| Saffle 2002    | +                                           | +                                       | ?                                                         | +                                               | +                                        | ?                                    | ?          |
| Sugerman 1997  | +                                           | +                                       | ?                                                         | +                                               | -                                        | ?                                    | -          |
| Trouillet 2011 | +                                           | +                                       | ?                                                         | +                                               | +                                        | +                                    | +          |
| Young 2013     | +                                           | +                                       | -                                                         | +                                               | +                                        | +                                    | +          |
| Zheng 2012     | +                                           | +                                       | ?                                                         | +                                               | +                                        | ?                                    | +          |

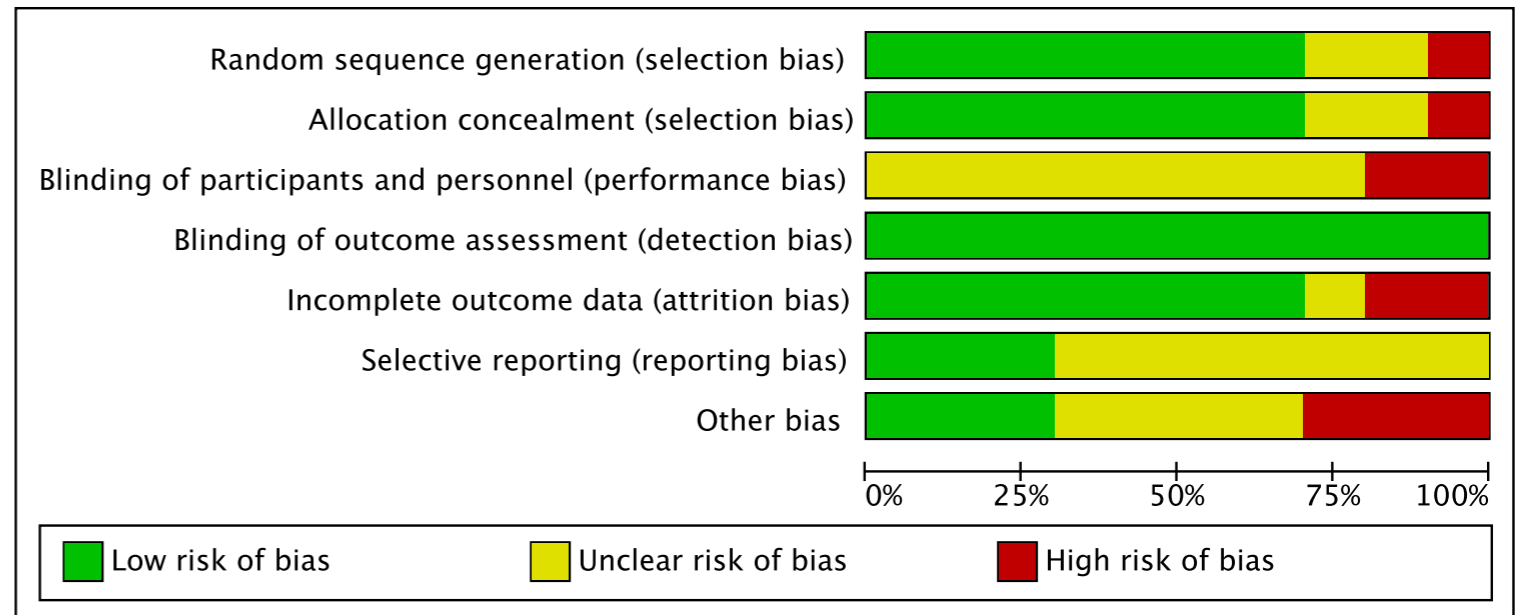

# VAP (7 days)

|                | Random sequence generation (selection bias) | Allocation concealment (selection bias) | Blinding of participants and personnel (performance bias) | Blinding of outcome assessment (detection bias) | Incomplete outcome data (attrition bias) | Selective reporting (reporting bias) | Other bias |
|----------------|---------------------------------------------|-----------------------------------------|-----------------------------------------------------------|-------------------------------------------------|------------------------------------------|--------------------------------------|------------|
| Bouderka 2004  | +                                           | ?                                       | ?                                                         | ?                                               | +                                        | ?                                    | ?          |
| Bylappa 2011   | ?                                           | ?                                       | ?                                                         | ?                                               | +                                        | ?                                    | ?          |
| Dunham 1984    | -                                           | -                                       | ?                                                         | ?                                               | +                                        | ?                                    | ?          |
| Dunham 2014    | ?                                           | ?                                       | ?                                                         | ?                                               | -                                        | ?                                    | -          |
| Rodriguez 1990 | -                                           | -                                       | ?                                                         | ?                                               | ?                                        | ?                                    | ?          |
| Rumbak 2004    | ?                                           | +                                       | ?                                                         | ?                                               | +                                        | ?                                    | ?          |
| Saffle 2002    | +                                           | +                                       | ?                                                         | ?                                               | +                                        | ?                                    | ?          |
| Sugerman 1997  | +                                           | +                                       | ?                                                         | ?                                               | -                                        | ?                                    | -          |
| Trouillet 2011 | +                                           | +                                       | ?                                                         | +                                               | +                                        | +                                    | +          |
| Zheng 2012     | +                                           | +                                       | ?                                                         | +                                               | +                                        | ?                                    | +          |

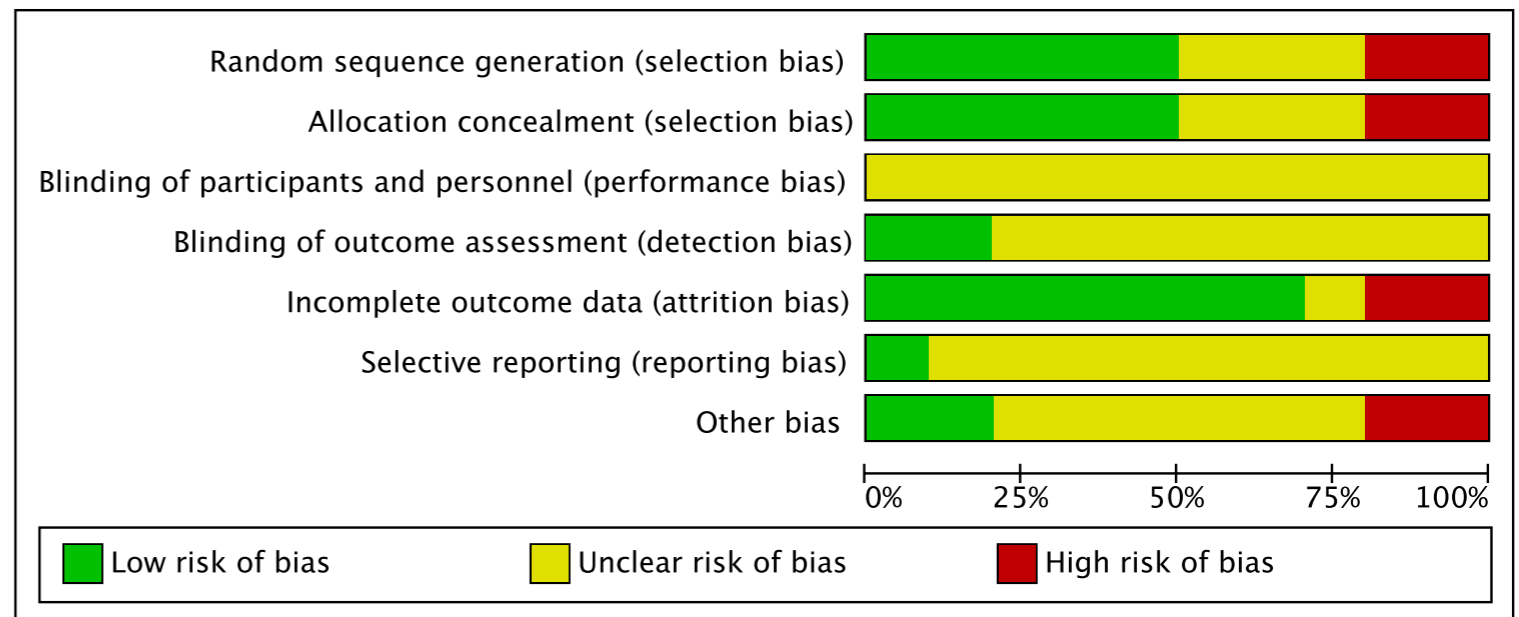

## Short term mortality (10 days)

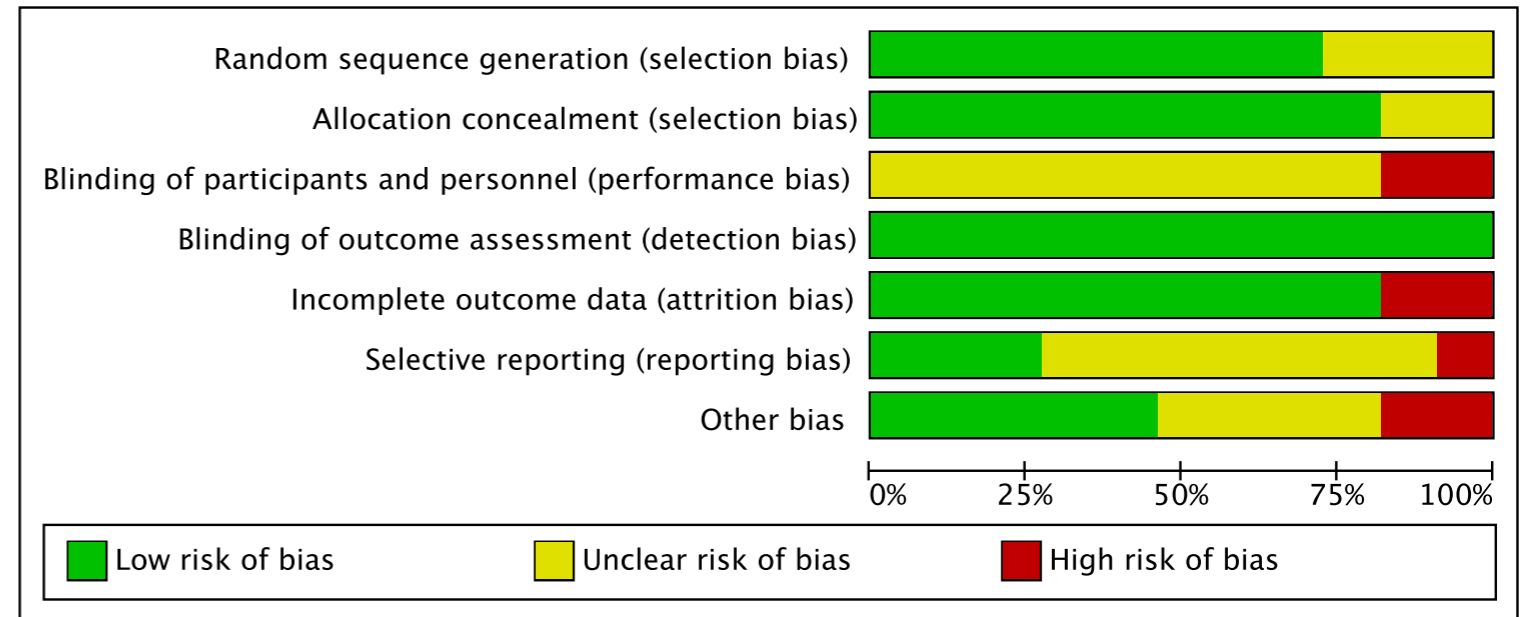

|                  | Random sequence generation (selection bias) | Allocation concealment (selection bias) | Blinding of participants and personnel (performance bias) | Blinding of outcome assessment (detection bias) | Incomplete outcome data (attrition bias) | Selective reporting (reporting bias) | Other bias |
|------------------|---------------------------------------------|-----------------------------------------|-----------------------------------------------------------|-------------------------------------------------|------------------------------------------|--------------------------------------|------------|
| Barquist 2006    | +                                           | +                                       | ?                                                         | +                                               | +                                        | ?                                    | ?          |
| Diaz-Prieto 2014 | +                                           | +                                       | ?                                                         | +                                               | +                                        | +                                    | +          |
| Dunham 2014      | ?                                           | ?                                       | ?                                                         | +                                               | -                                        | ?                                    | -          |
| Mohamed 2014     | ?                                           | ?                                       | -                                                         | +                                               | +                                        | ?                                    | ?          |
| Rumbak 2004      | ?                                           | +                                       | ?                                                         | +                                               | +                                        | ?                                    | ?          |
| Saffle 2002      | +                                           | +                                       | ?                                                         | +                                               | +                                        | ?                                    | ?          |
| Sugerman 1997    | +                                           | +                                       | ?                                                         | +                                               | -                                        | ?                                    | -          |
| Terragni 2010    | +                                           | +                                       | ?                                                         | +                                               | +                                        | -                                    | +          |
| Trouillet 2011   | +                                           | +                                       | ?                                                         | +                                               | +                                        | +                                    | +          |
| Young 2013       | +                                           | +                                       | -                                                         | +                                               | +                                        | +                                    | +          |
| Zheng 2012       | +                                           | +                                       | ?                                                         | +                                               | +                                        | ?                                    | +          |

## VAP (10 days)

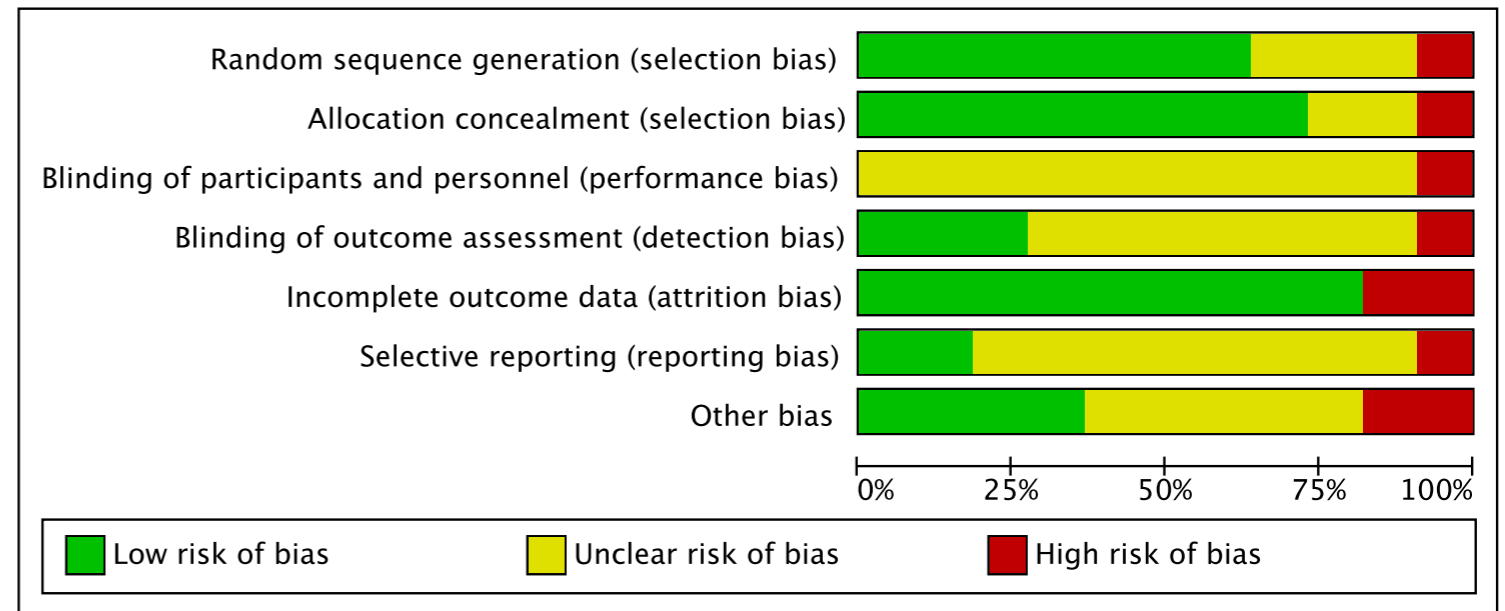

|                  | Random sequence generation (selection bias) | Allocation concealment (selection bias) | Blinding of participants and personnel (performance bias) | Blinding of outcome assessment (detection bias) | Incomplete outcome data (attrition bias) | Selective reporting (reporting bias) | Other bias |
|------------------|---------------------------------------------|-----------------------------------------|-----------------------------------------------------------|-------------------------------------------------|------------------------------------------|--------------------------------------|------------|
| Barquist 2006    | +                                           | +                                       | ?                                                         | ?                                               | +                                        | ?                                    | ?          |
| Diaz-Prieto 2014 | +                                           | +                                       | ?                                                         | ?                                               | +                                        | +                                    | +          |
| Dunham 1984      | -                                           | -                                       | ?                                                         | ?                                               | +                                        | ?                                    | ?          |
| Dunham 2014      | ?                                           | ?                                       | ?                                                         | ?                                               | -                                        | ?                                    | -          |
| Mohamed 2014     | ?                                           | ?                                       | -                                                         | -                                               | +                                        | ?                                    | ?          |
| Rumbak 2004      | ?                                           | +                                       | ?                                                         | ?                                               | +                                        | ?                                    | ?          |
| Saffle 2002      | +                                           | +                                       | ?                                                         | ?                                               | +                                        | ?                                    | ?          |
| Sugerman 1997    | +                                           | +                                       | ?                                                         | ?                                               | -                                        | ?                                    | -          |
| Terragni 2010    | +                                           | +                                       | ?                                                         | +                                               | +                                        | -                                    | +          |
| Trouillet 2011   | +                                           | +                                       | ?                                                         | +                                               | +                                        | +                                    | +          |
| Zheng 2012       | +                                           | +                                       | ?                                                         | +                                               | +                                        | ?                                    | +          |

## Short term mortality (4 days)

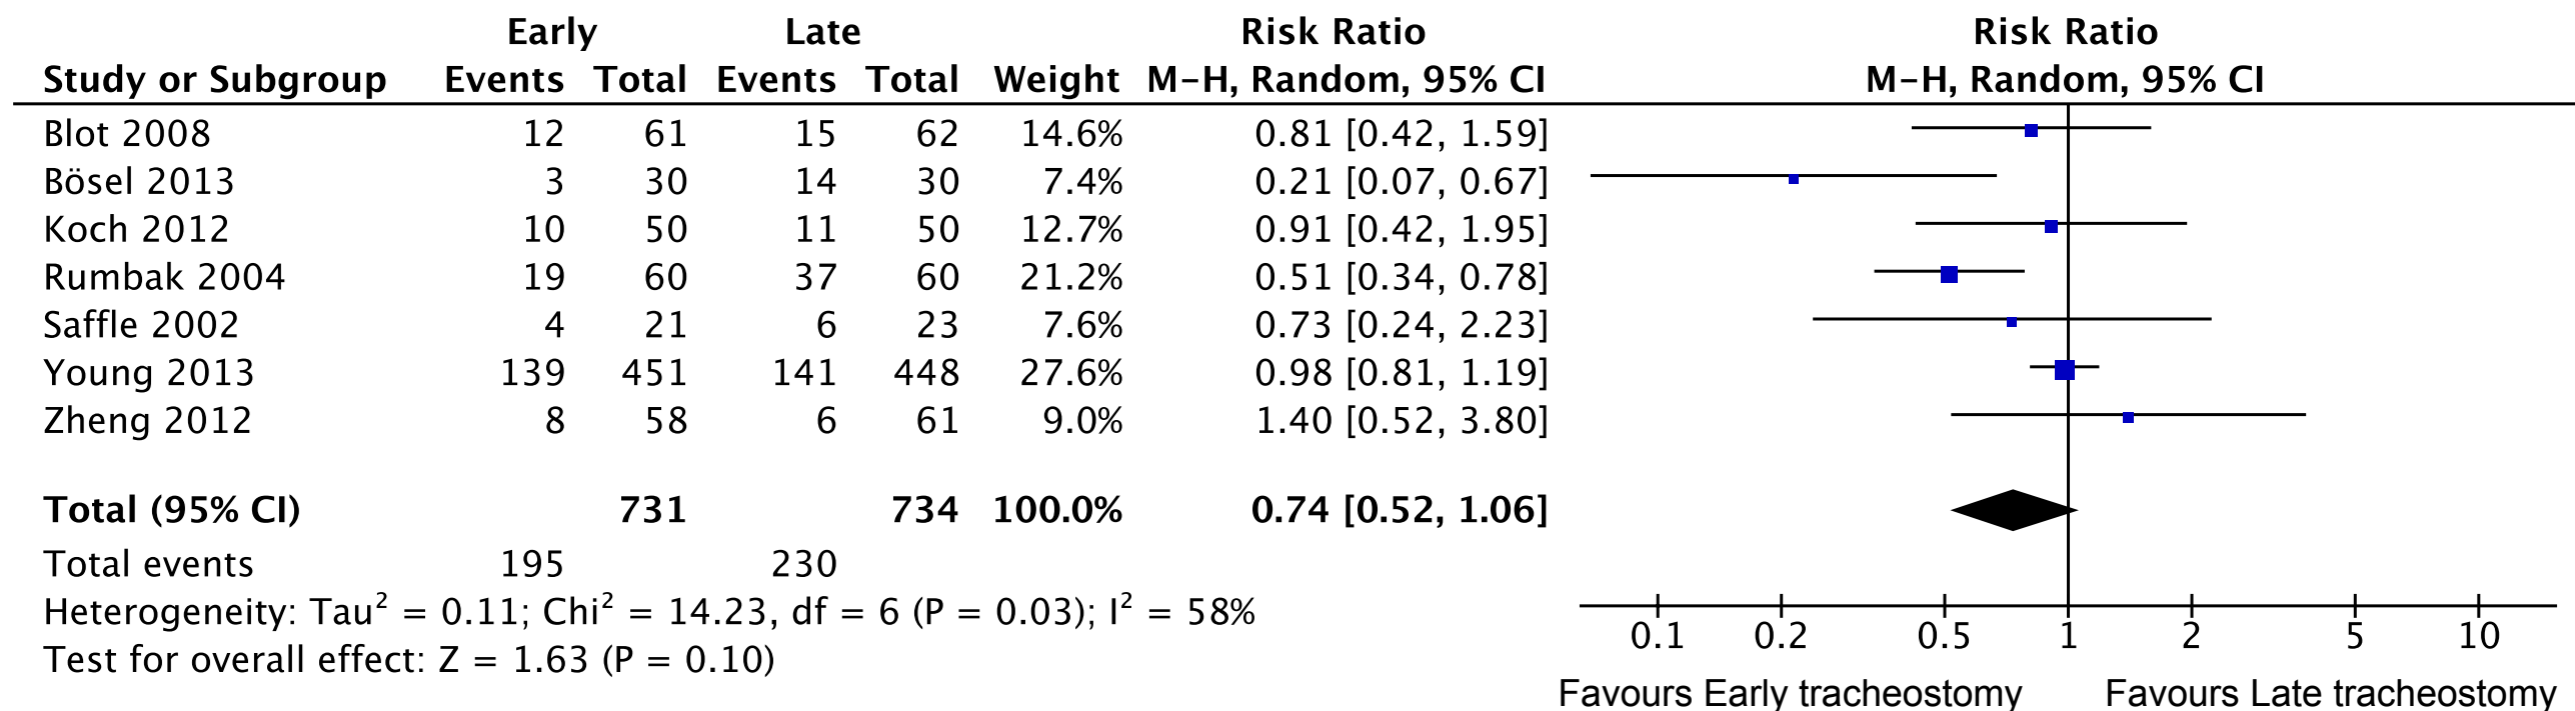

## VAP (4 days)

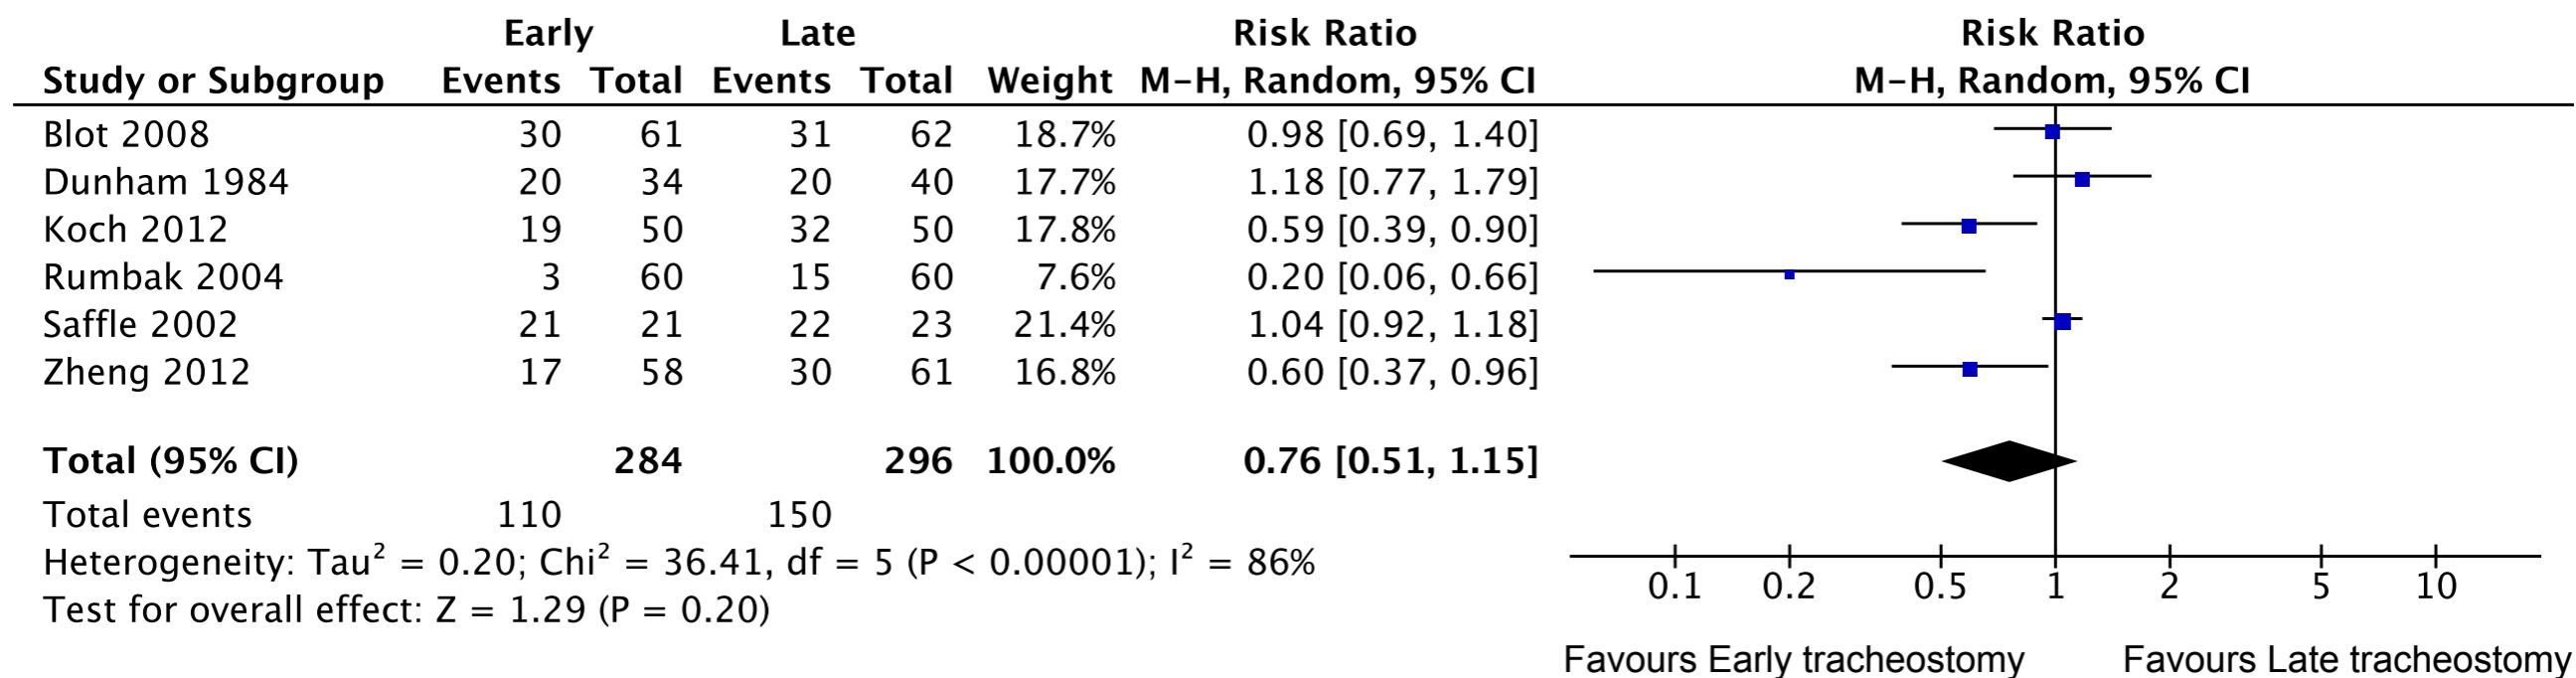

## Short term mortality (7 days)

| Study or Subgroup     | Early  |            | Late   |            | Weight        | Risk Ratio          |                     |
|-----------------------|--------|------------|--------|------------|---------------|---------------------|---------------------|
|                       | Events | Total      | Events | Total      |               | M-H, Random, 95% CI |                     |
| Bouderka 2004         | 12     | 31         | 7      | 31         | 9.5%          | 1.71                | [0.78, 3.77]        |
| Bösel 2013            | 3      | 30         | 14     | 30         | 5.8%          | 0.21                | [0.07, 0.67]        |
| Dunham 2014           | 0      | 15         | 0      | 9          |               | Not estimable       |                     |
| Rodriguez 1990        | 9      | 51         | 13     | 55         | 9.9%          | 0.75                | [0.35, 1.60]        |
| Rumbak 2004           | 19     | 60         | 37     | 60         | 16.5%         | 0.51                | [0.34, 0.78]        |
| Saffle 2002           | 4      | 21         | 6      | 23         | 5.9%          | 0.73                | [0.24, 2.23]        |
| Sugerman 1997         | 13     | 53         | 11     | 59         | 10.7%         | 1.32                | [0.65, 2.68]        |
| Trouillet 2011        | 17     | 109        | 23     | 107        | 13.3%         | 0.73                | [0.41, 1.28]        |
| Young 2013            | 139    | 451        | 141    | 448        | 21.5%         | 0.98                | [0.81, 1.19]        |
| Zheng 2012            | 8      | 58         | 6      | 61         | 7.0%          | 1.40                | [0.52, 3.80]        |
| <b>Total (95% CI)</b> |        | <b>879</b> |        | <b>883</b> | <b>100.0%</b> | <b>0.83</b>         | <b>[0.60, 1.13]</b> |

Total events

224

258

Heterogeneity:  $\text{Tau}^2 = 0.11$ ;  $\text{Chi}^2 = 18.88$ ,  $\text{df} = 8$  ( $P = 0.02$ );  $I^2 = 58\%$ Test for overall effect:  $Z = 1.18$  ( $P = 0.24$ )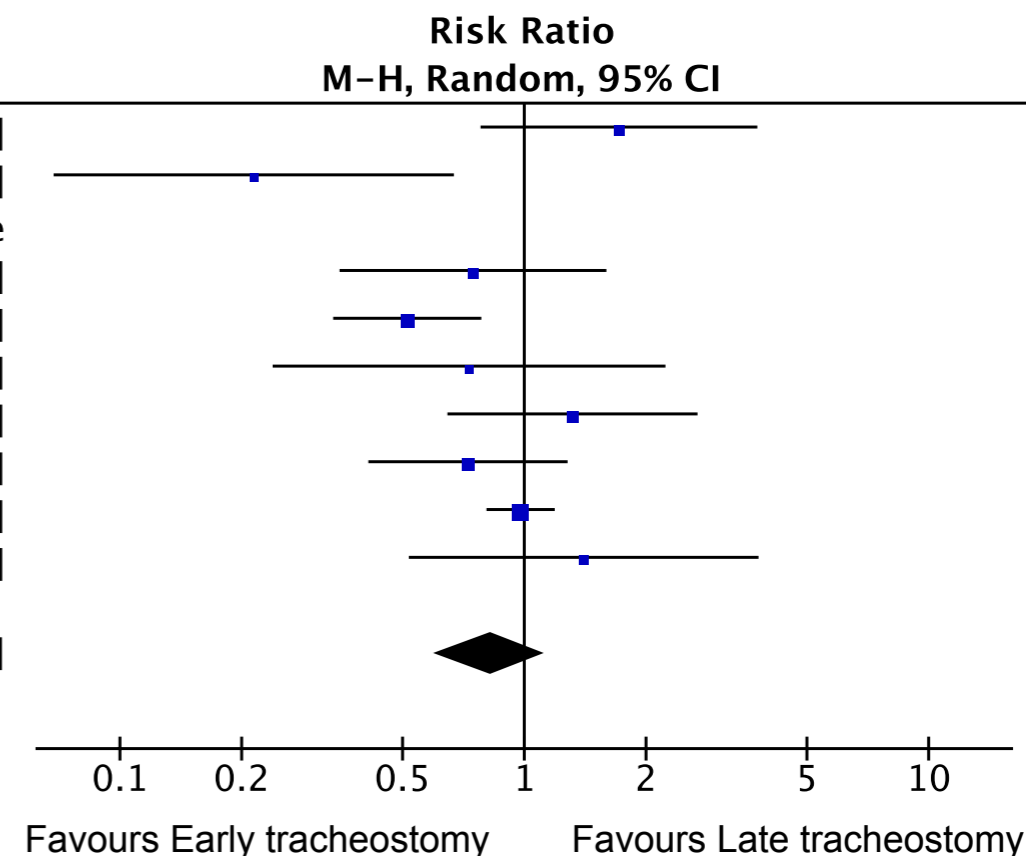

## VAP (7 days)

| Study or Subgroup     | Early  |            | Late   |            | Weight        | Risk Ratio          |                     |
|-----------------------|--------|------------|--------|------------|---------------|---------------------|---------------------|
|                       | Events | Total      | Events | Total      |               | M-H, Random, 95% CI |                     |
| Bouderka 2004         | 18     | 31         | 19     | 31         | 10.7%         | 0.95                | [0.63, 1.43]        |
| Bylappa 2011          | 3      | 22         | 13     | 22         | 2.8%          | 0.23                | [0.08, 0.70]        |
| Dunham 1984           | 20     | 34         | 20     | 40         | 10.5%         | 1.18                | [0.77, 1.79]        |
| Dunham 2014           | 7      | 15         | 4      | 9          | 3.9%          | 1.05                | [0.42, 2.61]        |
| Rodriguez 1990        | 40     | 51         | 53     | 55         | 17.1%         | 0.81                | [0.70, 0.95]        |
| Rumbak 2004           | 3      | 60         | 15     | 60         | 2.5%          | 0.20                | [0.06, 0.66]        |
| Saffle 2002           | 21     | 21         | 22     | 23         | 17.7%         | 1.04                | [0.92, 1.18]        |
| Sugerman 1997         | 26     | 53         | 32     | 56         | 11.9%         | 0.86                | [0.60, 1.23]        |
| Trouillet 2011        | 50     | 109        | 47     | 107        | 13.5%         | 1.04                | [0.78, 1.40]        |
| Zheng 2012            | 17     | 58         | 30     | 61         | 9.3%          | 0.60                | [0.37, 0.96]        |
| <b>Total (95% CI)</b> |        | <b>454</b> |        | <b>464</b> | <b>100.0%</b> | <b>0.85</b>         | <b>[0.70, 1.05]</b> |

Total events

205

255

Heterogeneity:  $\text{Tau}^2 = 0.06$ ;  $\text{Chi}^2 = 31.55$ ,  $\text{df} = 9$  ( $P = 0.0002$ );  $I^2 = 71\%$ Test for overall effect:  $Z = 1.52$  ( $P = 0.13$ )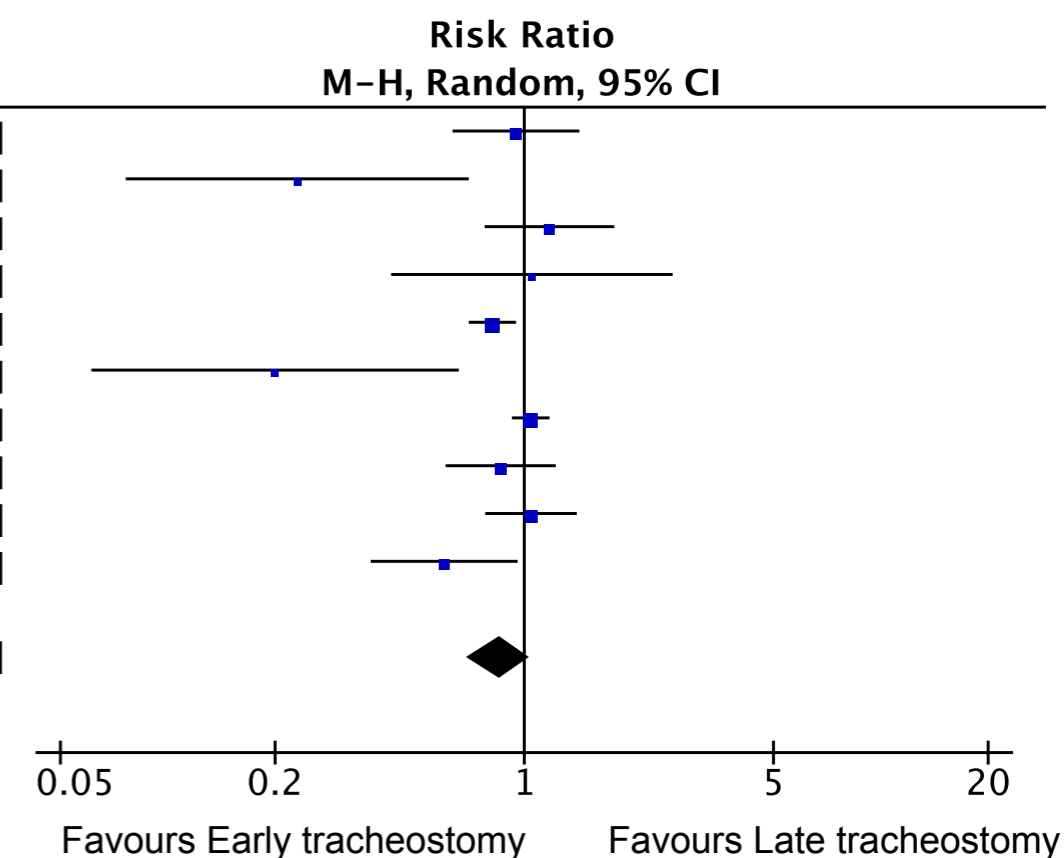

## Short term mortality (10 days)

| Study or Subgroup     | Early  |             | Late   |             | Weight        | Risk Ratio          |                     |
|-----------------------|--------|-------------|--------|-------------|---------------|---------------------|---------------------|
|                       | Events | Total       | Events | Total       |               | M-H, Random, 95% CI |                     |
| Barquist 2006         | 2      | 29          | 5      | 31          | 1.1%          | 0.43                | [0.09, 2.03]        |
| Diaz-Prieto 2014      | 42     | 245         | 47     | 244         | 14.3%         | 0.89                | [0.61, 1.30]        |
| Dunham 2014           | 0      | 15          | 0      | 9           |               | Not estimable       |                     |
| Mohamed 2014          | 8      | 20          | 8      | 20          | 4.4%          | 1.00                | [0.47, 2.14]        |
| Rumbak 2004           | 19     | 60          | 37     | 60          | 12.0%         | 0.51                | [0.34, 0.78]        |
| Saffle 2002           | 4      | 21          | 6      | 23          | 2.1%          | 0.73                | [0.24, 2.23]        |
| Sugerman 1997         | 13     | 53          | 11     | 59          | 4.9%          | 1.32                | [0.65, 2.68]        |
| Terragni 2010         | 55     | 209         | 66     | 210         | 19.5%         | 0.84                | [0.62, 1.13]        |
| Trouillet 2011        | 17     | 109         | 23     | 107         | 7.3%          | 0.73                | [0.41, 1.28]        |
| Young 2013            | 139    | 451         | 141    | 448         | 31.7%         | 0.98                | [0.81, 1.19]        |
| Zheng 2012            | 8      | 58          | 6      | 61          | 2.6%          | 1.40                | [0.52, 3.80]        |
| <b>Total (95% CI)</b> |        | <b>1270</b> |        | <b>1272</b> | <b>100.0%</b> | <b>0.86</b>         | <b>[0.73, 1.01]</b> |

Total events

307

350

Heterogeneity:  $\text{Tau}^2 = 0.01$ ;  $\text{Chi}^2 = 11.08$ ,  $\text{df} = 9$  ( $P = 0.27$ );  $I^2 = 19\%$ Test for overall effect:  $Z = 1.85$  ( $P = 0.06$ )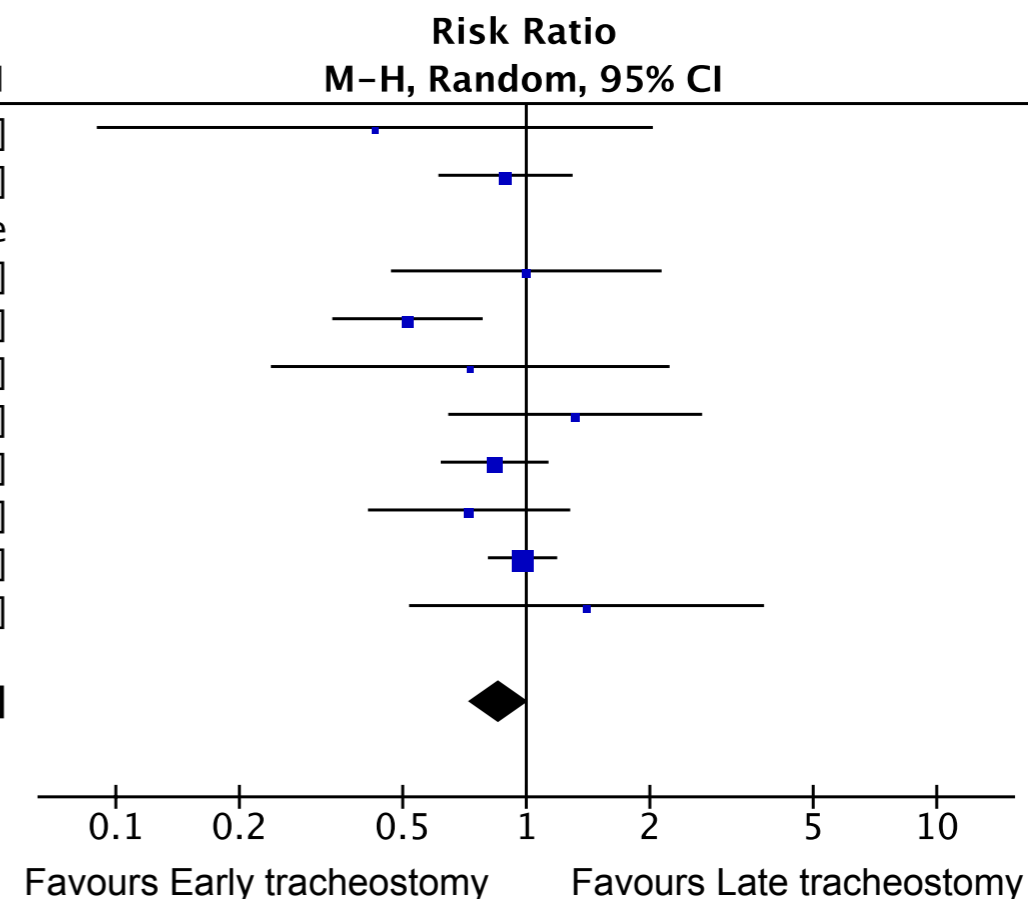

## VAP (10 days)

| Study or Subgroup     | Early  |            | Late   |            | Weight        | Risk Ratio          |                     |
|-----------------------|--------|------------|--------|------------|---------------|---------------------|---------------------|
|                       | Events | Total      | Events | Total      |               | M-H, Random, 95% CI |                     |
| Barquist 2006         | 28     | 29         | 28     | 31         | 17.0%         | 1.07                | [0.93, 1.22]        |
| Diaz-Prieto 2014      | 33     | 245        | 23     | 244        | 7.7%          | 1.43                | [0.86, 2.36]        |
| Dunham 1984           | 20     | 34         | 20     | 40         | 9.3%          | 1.18                | [0.77, 1.79]        |
| Dunham 2014           | 7      | 15         | 4      | 9          | 3.3%          | 1.05                | [0.42, 2.61]        |
| Mohamed 2014          | 4      | 20         | 8      | 20         | 2.7%          | 0.50                | [0.18, 1.40]        |
| Rumbak 2004           | 3      | 60         | 15     | 60         | 2.1%          | 0.20                | [0.06, 0.66]        |
| Saffle 2002           | 21     | 21         | 22     | 23         | 17.3%         | 1.04                | [0.92, 1.18]        |
| Sugerman 1997         | 26     | 53         | 32     | 56         | 10.8%         | 0.86                | [0.60, 1.23]        |
| Terragni 2010         | 30     | 209        | 44     | 210        | 9.2%          | 0.69                | [0.45, 1.05]        |
| Trouillet 2011        | 50     | 109        | 47     | 107        | 12.5%         | 1.04                | [0.78, 1.40]        |
| Zheng 2012            | 17     | 58         | 30     | 61         | 8.2%          | 0.60                | [0.37, 0.96]        |
| <b>Total (95% CI)</b> |        | <b>853</b> |        | <b>861</b> | <b>100.0%</b> | <b>0.93</b>         | <b>[0.77, 1.11]</b> |

Total events

239

273

Heterogeneity:  $\text{Tau}^2 = 0.05$ ;  $\text{Chi}^2 = 30.36$ ,  $\text{df} = 10$  ( $P = 0.0007$ );  $I^2 = 67\%$ Test for overall effect:  $Z = 0.84$  ( $P = 0.40$ )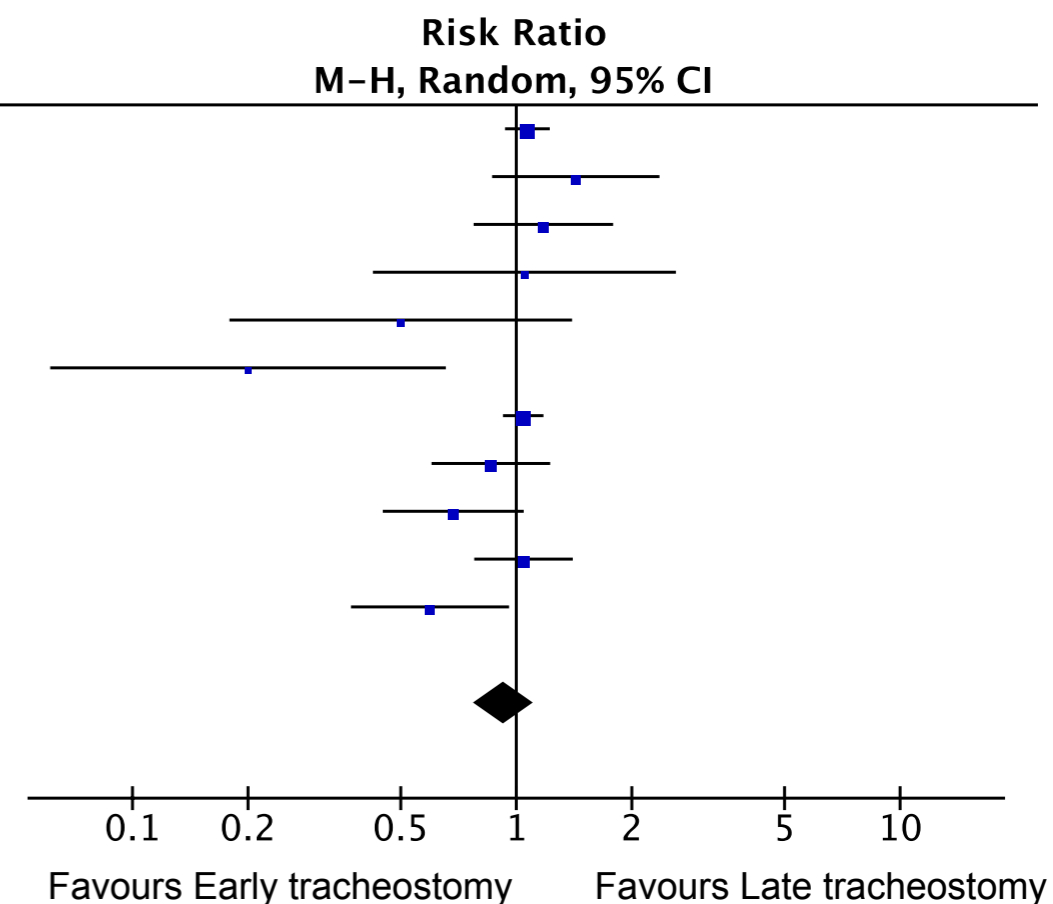



### Short term mortality (7 days)

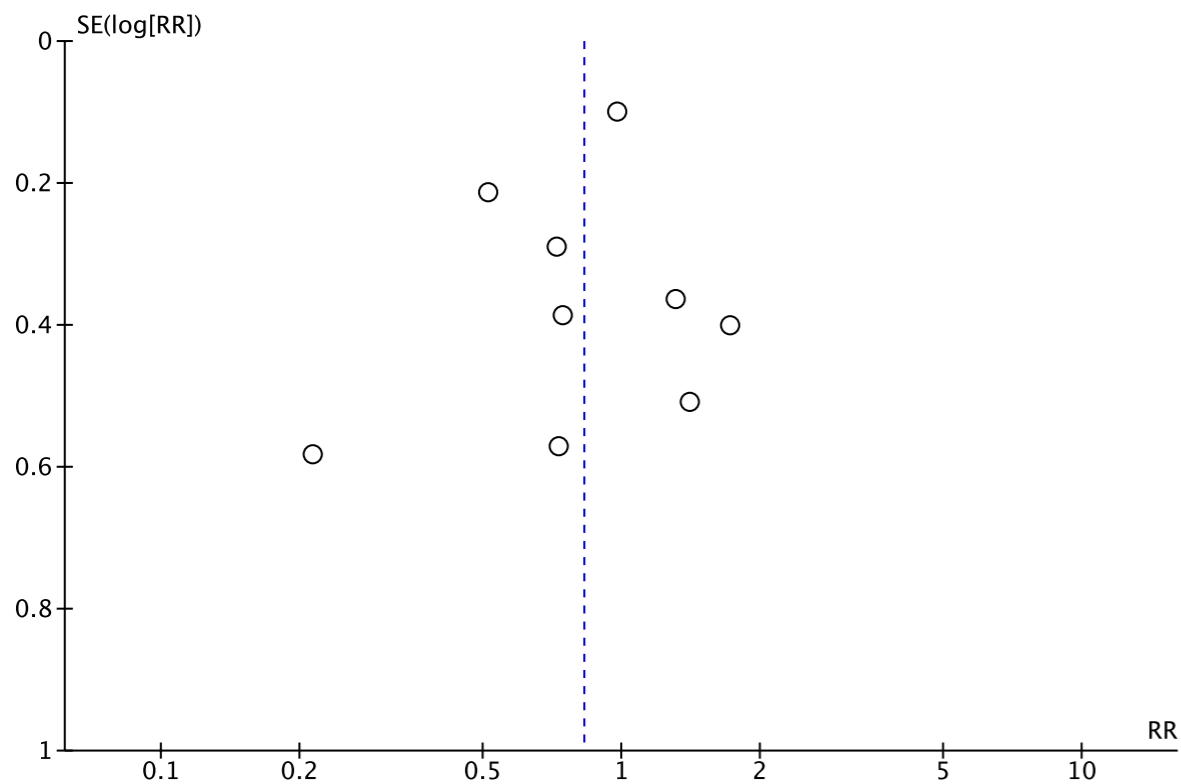

### Short term mortality (10 days)

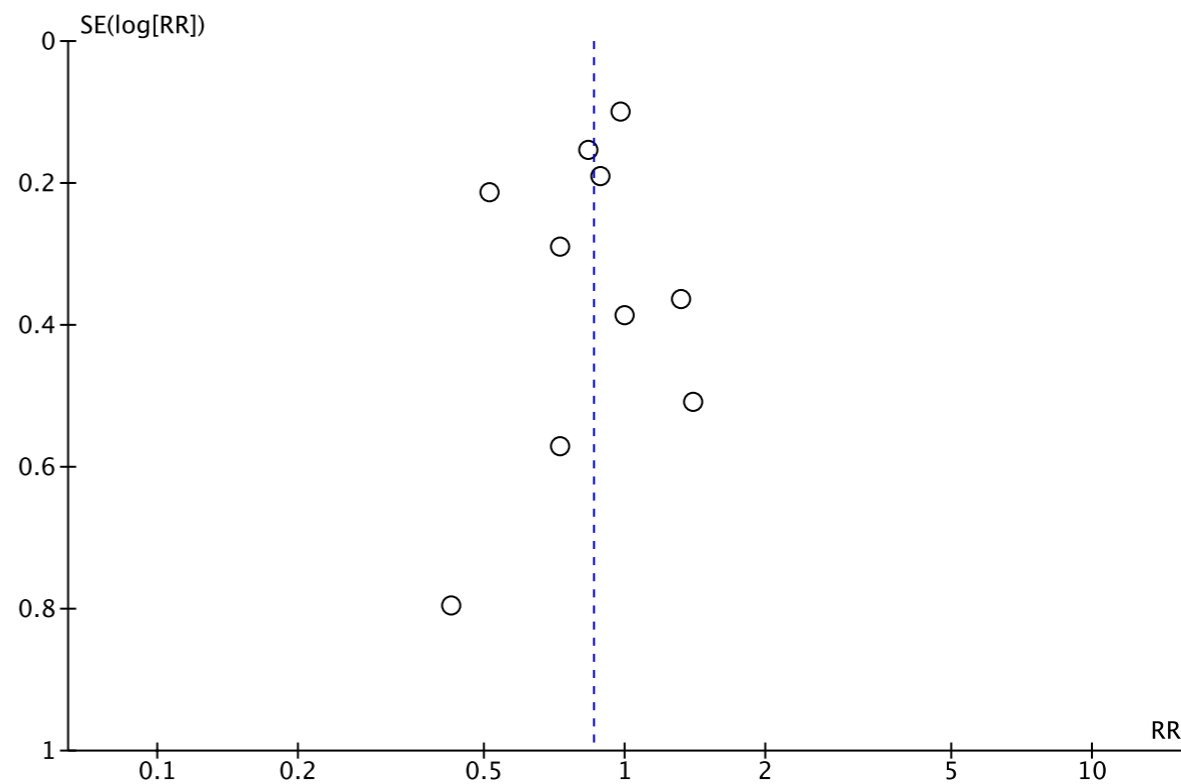

### VAP (7 days)

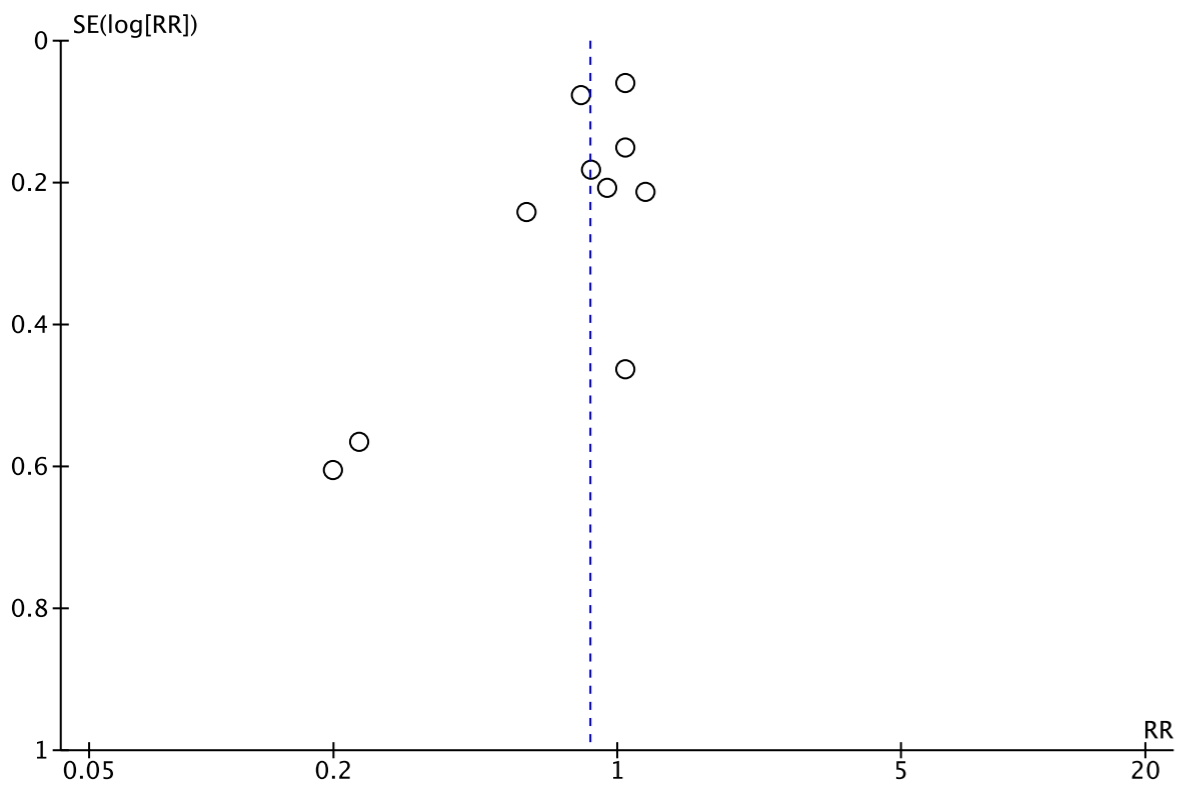

### VAP (10 days)

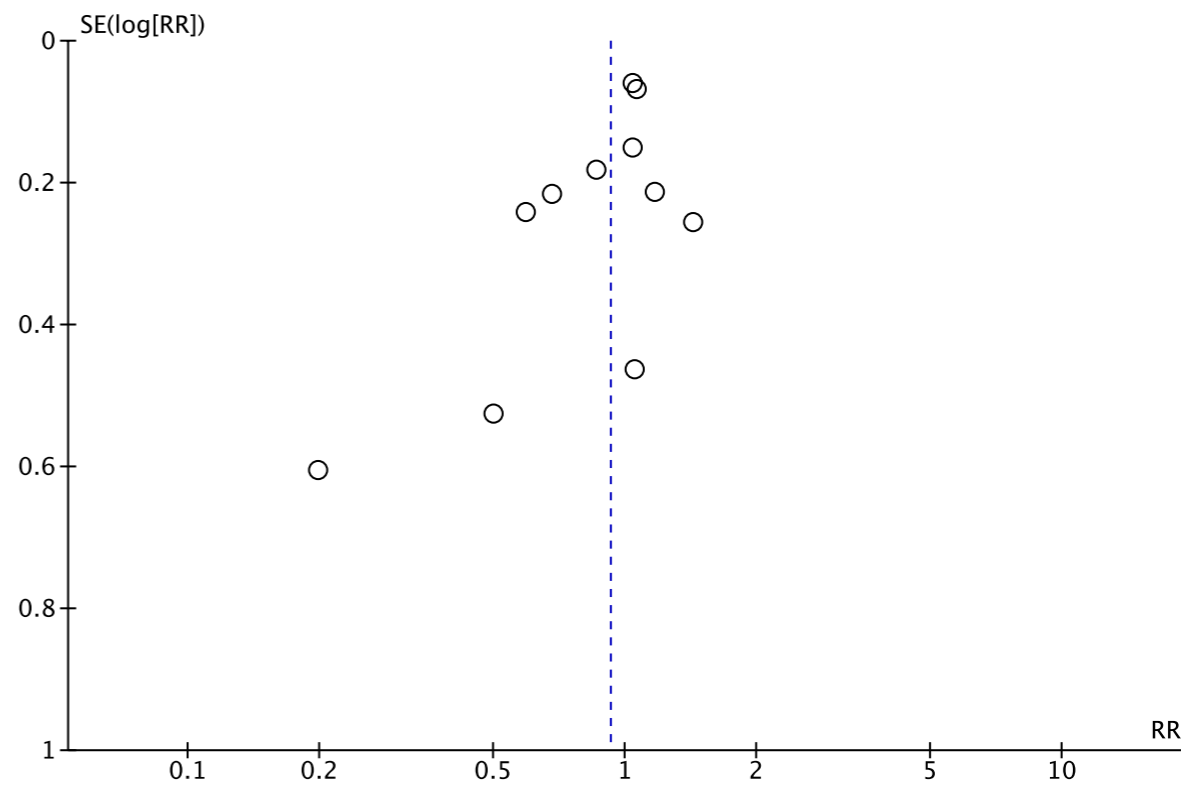

## Summary of findings:

**Early tracheotomy compared to late tracheotomy for ARDS**

Patient or population: ARDS

Intervention: early tracheotomy

Comparison: late tracheotomy

| Outcomes                          | Anticipated absolute effects* (95% CI) |                                     | Relative effect (95% CI)         | № of participants (studies) | Quality of the evidence (GRADE)      | Comments |
|-----------------------------------|----------------------------------------|-------------------------------------|----------------------------------|-----------------------------|--------------------------------------|----------|
|                                   | Risk with late tracheotomy             | Risk with early tracheotomy         |                                  |                             |                                      |          |
| Short term mortality (on 10 days) | <b>Study population</b>                |                                     | <b>RR 0.86</b><br>(0.73 to 1.01) | 2542<br>(11 RCTs)           | ⊕⊕○○<br>LOW <sup>1</sup>             |          |
|                                   | 275 per 1000                           | <b>237 per 1000</b><br>(201 to 278) |                                  |                             |                                      |          |
|                                   | <b>Low</b>                             |                                     |                                  |                             |                                      |          |
|                                   | 156 per 1000                           | <b>134 per 1000</b><br>(114 to 158) |                                  |                             |                                      |          |
|                                   | <b>High</b>                            |                                     |                                  |                             |                                      |          |
|                                   | 308 per 1000                           | <b>265 per 1000</b><br>(225 to 311) |                                  |                             |                                      |          |
| Short term mortality (on 7 days)  | <b>Study population</b>                |                                     | <b>RR 0.83</b><br>(0.60 to 1.13) | 1762<br>(10 RCTs)           | ⊕○○○<br>VERY LOW <sup>12</sup>       |          |
|                                   | 292 per 1000                           | <b>243 per 1000</b><br>(175 to 330) |                                  |                             |                                      |          |
|                                   | <b>Low</b>                             |                                     |                                  |                             |                                      |          |
|                                   | 156 per 1000                           | <b>129 per 1000</b><br>(94 to 176)  |                                  |                             |                                      |          |
|                                   | <b>High</b>                            |                                     |                                  |                             |                                      |          |
|                                   | 308 per 1000                           | <b>256 per 1000</b><br>(185 to 348) |                                  |                             |                                      |          |
| Short term mortality (on 4 days)  | <b>Study population</b>                |                                     | <b>RR 0.74</b><br>(0.52 to 1.06) | 1465<br>(7 RCTs)            | ⊕○○○<br>VERY LOW <sup>13</sup>       |          |
|                                   | 313 per 1000                           | <b>232 per 1000</b><br>(163 to 332) |                                  |                             |                                      |          |
|                                   | <b>Low</b>                             |                                     |                                  |                             |                                      |          |
|                                   | 156 per 1000                           | <b>115 per 1000</b><br>(81 to 165)  |                                  |                             |                                      |          |
|                                   | <b>High</b>                            |                                     |                                  |                             |                                      |          |
|                                   | 308 per 1000                           | <b>228 per 1000</b><br>(160 to 326) |                                  |                             |                                      |          |
| VAP (on 10 days)                  | <b>Study population</b>                |                                     | <b>RR 0.93</b><br>(0.77 to 1.11) | 1714<br>(11 RCTs)           | ⊕○○○<br>VERY LOW <sup>14,15,16</sup> |          |
|                                   | 317 per 1000                           | <b>295 per 1000</b><br>(244 to 352) |                                  |                             |                                      |          |
|                                   | <b>Low</b>                             |                                     |                                  |                             |                                      |          |
|                                   | 134 per 1000                           | <b>125 per 1000</b><br>(103 to 149) |                                  |                             |                                      |          |
|                                   | <b>High</b>                            |                                     |                                  |                             |                                      |          |
|                                   | 459 per 1000                           | <b>427 per 1000</b><br>(353 to 509) |                                  |                             |                                      |          |

|                 |                                     |                                     |                                  |                  |                                     |
|-----------------|-------------------------------------|-------------------------------------|----------------------------------|------------------|-------------------------------------|
| VAP (on 7 days) | <b>Study population</b>             |                                     | <b>RR 0.85</b><br>(0.70 to 1.05) | 918<br>(10 RCTs) | ⊕○○○<br>VERY<br>LOW <sup>1467</sup> |
|                 | 550 per 1000                        | <b>467 per 1000</b><br>(385 to 577) |                                  |                  |                                     |
|                 | <b>Low</b>                          |                                     |                                  |                  |                                     |
|                 | 134 per 1000                        | <b>114 per 1000</b><br>(94 to 141)  |                                  |                  |                                     |
|                 | <b>High</b>                         |                                     |                                  |                  |                                     |
| 459 per 1000    | <b>390 per 1000</b><br>(321 to 482) |                                     |                                  |                  |                                     |
| VAP (on 4 days) | <b>Study population</b>             |                                     | <b>RR 0.76</b><br>(0.51 to 1.15) | 580<br>(6 RCTs)  | ⊕○○○<br>VERY<br>LOW <sup>1468</sup> |
|                 | 507 per 1000                        | <b>385 per 1000</b><br>(258 to 583) |                                  |                  |                                     |
|                 | <b>Low</b>                          |                                     |                                  |                  |                                     |
|                 | 134 per 1000                        | <b>102 per 1000</b><br>(68 to 154)  |                                  |                  |                                     |
|                 | <b>High</b>                         |                                     |                                  |                  |                                     |
| 459 per 1000    | <b>349 per 1000</b><br>(234 to 528) |                                     |                                  |                  |                                     |

\*The risk in the intervention group (and its 95% confidence interval) is based on the assumed risk in the comparison group and the relative effect of the intervention (and its 95% CI).

CI: Confidence interval; RR: Risk ratio;

#### GRADE Working Group grades of evidence

**High quality:** We are very confident that the true effect lies close to that of the estimate of the effect

**Moderate quality:** We are moderately confident in the effect estimate: The true effect is likely to be close to the estimate of the effect, but there is a possibility that it is substantially different

**Low quality:** Our confidence in the effect estimate is limited: The true effect may be substantially different from the estimate of the effect

**Very low quality:** We have very little confidence in the effect estimate: The true effect is likely to be substantially different from the estimate of effect

- 1 Since the upper and lower limits of the confidence interval of the effect estimate overlap the "clinical decision thresholds", the quality of evidence was downgraded by one level. In addition, the subjects are not necessarily patients with ARDS but "critically ill patients who are dependent on mechanical ventilator"
- 2 Since the confidence interval is partially overlapped and the heterogeneity is significant with  $I^2=58%$  and  $P=0.02$ , the quality of evidence was downgraded by one level.
- 3 Since the confidence interval is partially overlapped and the heterogeneity is significant with  $I^2=58%$  and  $P=0.03$ , the quality of evidence was downgraded by one level.
- 4 Since the serious limitations are exist, the quality of evidence was downgraded by one level.
- 5 Since the confidence interval is partially overlapped and the heterogeneity is significant with  $I^2=67%$  and  $P=0.0007$ , the quality of evidence was downgraded by one level.
- 6 Since funnel plot is asymmetry, publication bias was suspected.
- 7 Since the confidence interval is partially overlapped and the heterogeneity is significant with  $I^2=71%$  and  $P=0.0002$ , the quality of evidence was downgraded by one level.
- 8 Since the confidence interval is partially overlapped and the heterogeneity is significant with  $I^2=86%$  and  $P<0.000001$ , the quality of evidence was downgraded by one level.

## CQ1:

Question: Early tracheotomy compared to late tracheotomy for ARDS

| Quality assessment                |                   |                      |                      |              |                      |                                         | Number of patients |                  | Effect                           |                                                  | Quality                             | Importance |
|-----------------------------------|-------------------|----------------------|----------------------|--------------|----------------------|-----------------------------------------|--------------------|------------------|----------------------------------|--------------------------------------------------|-------------------------------------|------------|
| Number of studies                 | Study design      | Risk of bias         | Inconsistency        | Indirectness | Imprecision          | Other considerations                    | Early              | Late             | Relative (95% CI)                | Absolute (95% CI)                                |                                     |            |
| Short-term mortality (on 10 days) |                   |                      |                      |              |                      |                                         |                    |                  |                                  |                                                  |                                     |            |
| 11                                | Randomized trials | Not serious          | Not serious          | Serious      | Serious <sup>1</sup> | None                                    | 307/1270 (24.2%)   | 350/1272 (27.5%) | <b>RR 0.86</b><br>(0.73 to 1.01) | 39 fewer per 1000<br>(from 3 more to 74 fewer)   | ⊕⊕⊖⊖<br>LOW <sup>1</sup>            | CRITICAL   |
|                                   |                   |                      |                      |              |                      |                                         |                    | 15.6%            |                                  | 22 fewer per 1000<br>(from 2 more to 42 fewer)   |                                     |            |
|                                   |                   |                      |                      |              |                      |                                         |                    | 30.8%            |                                  | 43 fewer per 1000<br>(from 3 more to 83 fewer)   |                                     |            |
| Short-term mortality (on 7 days)  |                   |                      |                      |              |                      |                                         |                    |                  |                                  |                                                  |                                     |            |
| 10                                | Randomized trials | Not serious          | Serious <sup>2</sup> | Serious      | Serious <sup>1</sup> | None                                    | 224/879 (25.5%)    | 258/883 (29.2%)  | <b>RR 0.83</b><br>(0.60 to 1.13) | 50 fewer per 1000<br>(from 38 more to 117 fewer) | ⊕⊖⊖⊖<br>VERY LOW <sup>1,2</sup>     | CRITICAL   |
|                                   |                   |                      |                      |              |                      |                                         |                    | 15.6%            |                                  | 27 fewer per 1000<br>(from 20 more to 62 fewer)  |                                     |            |
|                                   |                   |                      |                      |              |                      |                                         |                    | 30.8%            |                                  | 52 fewer per 1000<br>(from 40 more to 123 fewer) |                                     |            |
| Short-term mortality (on 4 days)  |                   |                      |                      |              |                      |                                         |                    |                  |                                  |                                                  |                                     |            |
| 7                                 | Randomized trials | Not serious          | Serious <sup>3</sup> | Serious      | Serious <sup>1</sup> | None                                    | 195/731 (26.7%)    | 230/734 (31.3%)  | <b>RR 0.74</b><br>(0.52 to 1.06) | 81 fewer per 1000<br>(from 19 more to 150 fewer) | ⊕⊖⊖⊖<br>VERY LOW <sup>1,3</sup>     | CRITICAL   |
|                                   |                   |                      |                      |              |                      |                                         |                    | 15.6%            |                                  | 41 fewer per 1000<br>(from 9 more to 75 fewer)   |                                     |            |
|                                   |                   |                      |                      |              |                      |                                         |                    | 30.8%            |                                  | 80 fewer per 1000<br>(from 18 more to 148 fewer) |                                     |            |
| VAP (on 10 days)                  |                   |                      |                      |              |                      |                                         |                    |                  |                                  |                                                  |                                     |            |
| 11                                | Randomized trials | Serious <sup>4</sup> | Serious <sup>5</sup> | Serious      | Serious <sup>1</sup> | Publication bias suspected <sup>6</sup> | 239/853 (28.0%)    | 273/861 (31.7%)  | <b>RR 0.93</b><br>(0.77 to 1.11) | 22 fewer per 1000<br>(from 35 more to 73 fewer)  | ⊕⊖⊖⊖<br>VERY LOW <sup>1,4,5,6</sup> | CRITICAL   |
|                                   |                   |                      |                      |              |                      |                                         |                    | 13.4%            |                                  | 9 fewer per 1000<br>(from 15 more to 31 fewer)   |                                     |            |

|                 |                   |                      |                      |         |                      |                                         |                    |                 |                                  |                                                   |                                        |          |
|-----------------|-------------------|----------------------|----------------------|---------|----------------------|-----------------------------------------|--------------------|-----------------|----------------------------------|---------------------------------------------------|----------------------------------------|----------|
|                 |                   |                      |                      |         |                      |                                         |                    | 45.9%           |                                  | 32 fewer per 1000<br>(from 50 more to 106 fewer)  |                                        |          |
| VAP (on 7 days) |                   |                      |                      |         |                      |                                         |                    |                 |                                  |                                                   |                                        |          |
| 10              | Randomized trials | Serious <sup>4</sup> | Serious <sup>2</sup> | Serious | Serious <sup>1</sup> | Publication bias suspected <sup>6</sup> | 205/454<br>(45.2%) | 255/464 (55.0%) | <b>RR 0.85</b><br>(0.70 to 1.05) | 82 fewer per 1000<br>(from 27 more to 165 fewer)  | ⊕ ⊖ ⊖ ⊖<br>VERY LOW <sup>1,4,6,7</sup> | CRITICAL |
|                 |                   |                      |                      |         |                      |                                         |                    | 13.4%           |                                  | 20 fewer per 1000<br>(from 7 more to 40 fewer)    |                                        |          |
|                 |                   |                      |                      |         |                      |                                         |                    | 45.9%           |                                  | 69 fewer per 1000<br>(from 23 more to 138 fewer)  |                                        |          |
| VAP (on 4 days) |                   |                      |                      |         |                      |                                         |                    |                 |                                  |                                                   |                                        |          |
| 6               | Randomized trials | Serious <sup>4</sup> | Serious <sup>6</sup> | Serious | Serious <sup>1</sup> | None                                    | 110/284<br>(38.7%) | 150/296 (50.7%) | <b>RR 0.76</b><br>(0.51 to 1.15) | 122 fewer per 1000<br>(from 76 more to 248 fewer) | ⊕ ⊖ ⊖ ⊖<br>VERY LOW <sup>1,4,6,8</sup> | CRITICAL |
|                 |                   |                      |                      |         |                      |                                         |                    | 13.4%           |                                  | 32 fewer per 1000<br>(from 20 more to 66 fewer)   |                                        |          |
|                 |                   |                      |                      |         |                      |                                         |                    | 45.9%           |                                  | 110 fewer per 1000<br>(from 69 more to 225 fewer) |                                        |          |

CI – confidence interval, RR – relative risk

- 1 Since the upper and lower limits of the confidence interval of the effect estimate overlap the “clinical decision thresholds”, the quality of evidence was downgraded by one level. In addition, the subjects are not necessarily patients with ARDS but “critically ill patients who are dependent on mechanical ventilator”
- 2 Since the confidence interval is partially overlapped and the heterogeneity is significant with I<sup>2</sup>=58% and P=0.02, the quality of evidence was downgraded by one level.
- 3 Since the confidence interval is partially overlapped and the heterogeneity is significant with I<sup>2</sup>=58% and P=0.03, the quality of evidence was downgraded by one level.
- 4 Since the serious limitations are exist, the quality of evidence was downgraded by one level.
- 5 Since the confidence interval is partially overlapped and the heterogeneity is significant with I<sup>2</sup>=67% and P=0.0007, the quality of evidence was downgraded by one level.
- 6 Since funnel plot is asymmetry, publication bias was suspected.
- 7 Since the confidence interval is partially overlapped and the heterogeneity is significant with I<sup>2</sup>=71% and P=0.0002, the quality of evidence was downgraded by one level.
- 8 Since the confidence interval is partially overlapped and the heterogeneity is significant with I<sup>2</sup>=86% and P<0.000001, the quality of evidence was downgraded by one level.

**Evidence-to-Decision table**

**CQ1 : Should early tracheostomy be performed in adult patients with ARDS?**

POPULATION : ADULT PATIENTS ANTICIPATED TO REQUIRE LONG-TERM MECHANICAL VENTILATION

INTERVENTION : EARLY TRACHEOSTOMY

| CRITERIA                                                         | CRITERIA                                                                                                                                                                                                                                                                                                                                                                                                                                                                                                                     | CRITERIA                                                                                                                                                                                                                                                                                                                                                                                                                                                                                                                                                                                                                                                                                                                                                                                                                                                                                                                                                                                                                                                                                                                                                                                                                                                                                                                                                                                                                      | ADDITIONAL CONSIDERATIONS                                                                                                                                                                                    |                                                                                                                                                                                                   |                                   |                                                                  |          |             |                                                                 |          |                  |                                                                 |          |                  |                                             |          |                  |                                            |          |                  |                                            |          |                  |                             |          |                                                       |
|------------------------------------------------------------------|------------------------------------------------------------------------------------------------------------------------------------------------------------------------------------------------------------------------------------------------------------------------------------------------------------------------------------------------------------------------------------------------------------------------------------------------------------------------------------------------------------------------------|-------------------------------------------------------------------------------------------------------------------------------------------------------------------------------------------------------------------------------------------------------------------------------------------------------------------------------------------------------------------------------------------------------------------------------------------------------------------------------------------------------------------------------------------------------------------------------------------------------------------------------------------------------------------------------------------------------------------------------------------------------------------------------------------------------------------------------------------------------------------------------------------------------------------------------------------------------------------------------------------------------------------------------------------------------------------------------------------------------------------------------------------------------------------------------------------------------------------------------------------------------------------------------------------------------------------------------------------------------------------------------------------------------------------------------|--------------------------------------------------------------------------------------------------------------------------------------------------------------------------------------------------------------|---------------------------------------------------------------------------------------------------------------------------------------------------------------------------------------------------|-----------------------------------|------------------------------------------------------------------|----------|-------------|-----------------------------------------------------------------|----------|------------------|-----------------------------------------------------------------|----------|------------------|---------------------------------------------|----------|------------------|--------------------------------------------|----------|------------------|--------------------------------------------|----------|------------------|-----------------------------|----------|-------------------------------------------------------|
| <b>PROBLEM</b>                                                   | <p><b>Is the problem a priority?</b></p> <p> <input type="radio"/> No<br/> <input type="radio"/> Probably no<br/> <input checked="" type="radio"/> Probably yes<br/> <input type="radio"/> Yes<br/>                     -----<br/> <input type="radio"/> Varies<br/> <input type="radio"/> Don't know                 </p>                                                                                                                                                                                                   | <p>In patients requiring mechanical ventilation, airway management by tracheal intubation is generally used. However, airway management by tracheostomy has some advantages including potential reduction of the need for sedative-analgesic agents and avoidance of vocal cord injury by the endotracheal tube<sup>1, 2</sup>. However, tracheostomy is invasive in itself and is also associated with complications such as bleeding or tracheal stenosis<sup>3, 4</sup>. For these reasons, tracheostomy is generally performed when the trachea has been intubated for at least 14 days and prolonged mechanical ventilation is anticipated. However, it has been suggested that early tracheostomy could shorten the duration of mechanical ventilation, reduce ventilator associated pneumonia (VAP), and improve outcome by maximizing these advantages. Therefore, it is important to examine the potential for early tracheostomy to improve outcomes in patients with ARDS anticipating prolonged mechanical ventilation. Currently, there is no study that has investigated the appropriate timing for tracheostomy exclusively in adult patients with ARDS. In this CQ, several studies including patients anticipated to require long-term mechanical ventilation, including patients with ARDS, were examined in order to determine whether early tracheostomy is beneficial in improving patient outcomes.</p> |                                                                                                                                                                                                              |                                                                                                                                                                                                   |                                   |                                                                  |          |             |                                                                 |          |                  |                                                                 |          |                  |                                             |          |                  |                                            |          |                  |                                            |          |                  |                             |          |                                                       |
|                                                                  | <p><b>What is the overall certainty of the evidence of effects?</b></p> <p> <input type="radio"/> Very low<br/> <input checked="" type="radio"/> Low<br/> <input type="radio"/> Moderate<br/> <input type="radio"/> High<br/>                     -----<br/> <input type="radio"/> No included studies                 </p>                                                                                                                                                                                                  | <p><b>The relative importance or values of the main outcomes of interest:</b></p> <table border="1"> <thead> <tr> <th>Outcome</th> <th>Relative importance</th> <th>Certainty of the evidence (GRADE)</th> </tr> </thead> <tbody> <tr> <td>Mortality(short-term)<br/><small>(Note 1)</small><br/>(on 10 days)</td> <td>CRITICAL</td> <td>⊕⊕⊖⊖<br/>LOW</td> </tr> <tr> <td>Mortality(short-term)<br/><small>(Note 1)</small><br/>(on 7 days)</td> <td>CRITICAL</td> <td>⊕⊖⊖⊖<br/>VERY LOW</td> </tr> <tr> <td>Mortality(short-term)<br/><small>(Note 1)</small><br/>(on 4 days)</td> <td>CRITICAL</td> <td>⊕⊖⊖⊖<br/>VERY LOW</td> </tr> <tr> <td>VAP <small>(Note 2)</small><br/>(on 10 days)</td> <td>CRITICAL</td> <td>⊕⊖⊖⊖<br/>VERY LOW</td> </tr> <tr> <td>VAP <small>(Note 2)</small><br/>(on 7 days)</td> <td>CRITICAL</td> <td>⊕⊖⊖⊖<br/>VERY LOW</td> </tr> <tr> <td>VAP <small>(Note 2)</small><br/>(on 4 days)</td> <td>CRITICAL</td> <td>⊕⊖⊖⊖<br/>VERY LOW</td> </tr> <tr> <td>VFD <small>(Note 3)</small></td> <td>CRITICAL</td> <td>No studies <small>(Additional considerations)</small></td> </tr> </tbody> </table>                                                                                                                                                                                                                                                                                             | Outcome                                                                                                                                                                                                      | Relative importance                                                                                                                                                                               | Certainty of the evidence (GRADE) | Mortality(short-term)<br><small>(Note 1)</small><br>(on 10 days) | CRITICAL | ⊕⊕⊖⊖<br>LOW | Mortality(short-term)<br><small>(Note 1)</small><br>(on 7 days) | CRITICAL | ⊕⊖⊖⊖<br>VERY LOW | Mortality(short-term)<br><small>(Note 1)</small><br>(on 4 days) | CRITICAL | ⊕⊖⊖⊖<br>VERY LOW | VAP <small>(Note 2)</small><br>(on 10 days) | CRITICAL | ⊕⊖⊖⊖<br>VERY LOW | VAP <small>(Note 2)</small><br>(on 7 days) | CRITICAL | ⊕⊖⊖⊖<br>VERY LOW | VAP <small>(Note 2)</small><br>(on 4 days) | CRITICAL | ⊕⊖⊖⊖<br>VERY LOW | VFD <small>(Note 3)</small> | CRITICAL | No studies <small>(Additional considerations)</small> |
| Outcome                                                          | Relative importance                                                                                                                                                                                                                                                                                                                                                                                                                                                                                                          | Certainty of the evidence (GRADE)                                                                                                                                                                                                                                                                                                                                                                                                                                                                                                                                                                                                                                                                                                                                                                                                                                                                                                                                                                                                                                                                                                                                                                                                                                                                                                                                                                                             |                                                                                                                                                                                                              |                                                                                                                                                                                                   |                                   |                                                                  |          |             |                                                                 |          |                  |                                                                 |          |                  |                                             |          |                  |                                            |          |                  |                                            |          |                  |                             |          |                                                       |
| Mortality(short-term)<br><small>(Note 1)</small><br>(on 10 days) | CRITICAL                                                                                                                                                                                                                                                                                                                                                                                                                                                                                                                     | ⊕⊕⊖⊖<br>LOW                                                                                                                                                                                                                                                                                                                                                                                                                                                                                                                                                                                                                                                                                                                                                                                                                                                                                                                                                                                                                                                                                                                                                                                                                                                                                                                                                                                                                   |                                                                                                                                                                                                              |                                                                                                                                                                                                   |                                   |                                                                  |          |             |                                                                 |          |                  |                                                                 |          |                  |                                             |          |                  |                                            |          |                  |                                            |          |                  |                             |          |                                                       |
| Mortality(short-term)<br><small>(Note 1)</small><br>(on 7 days)  | CRITICAL                                                                                                                                                                                                                                                                                                                                                                                                                                                                                                                     | ⊕⊖⊖⊖<br>VERY LOW                                                                                                                                                                                                                                                                                                                                                                                                                                                                                                                                                                                                                                                                                                                                                                                                                                                                                                                                                                                                                                                                                                                                                                                                                                                                                                                                                                                                              |                                                                                                                                                                                                              |                                                                                                                                                                                                   |                                   |                                                                  |          |             |                                                                 |          |                  |                                                                 |          |                  |                                             |          |                  |                                            |          |                  |                                            |          |                  |                             |          |                                                       |
| Mortality(short-term)<br><small>(Note 1)</small><br>(on 4 days)  | CRITICAL                                                                                                                                                                                                                                                                                                                                                                                                                                                                                                                     | ⊕⊖⊖⊖<br>VERY LOW                                                                                                                                                                                                                                                                                                                                                                                                                                                                                                                                                                                                                                                                                                                                                                                                                                                                                                                                                                                                                                                                                                                                                                                                                                                                                                                                                                                                              |                                                                                                                                                                                                              |                                                                                                                                                                                                   |                                   |                                                                  |          |             |                                                                 |          |                  |                                                                 |          |                  |                                             |          |                  |                                            |          |                  |                                            |          |                  |                             |          |                                                       |
| VAP <small>(Note 2)</small><br>(on 10 days)                      | CRITICAL                                                                                                                                                                                                                                                                                                                                                                                                                                                                                                                     | ⊕⊖⊖⊖<br>VERY LOW                                                                                                                                                                                                                                                                                                                                                                                                                                                                                                                                                                                                                                                                                                                                                                                                                                                                                                                                                                                                                                                                                                                                                                                                                                                                                                                                                                                                              |                                                                                                                                                                                                              |                                                                                                                                                                                                   |                                   |                                                                  |          |             |                                                                 |          |                  |                                                                 |          |                  |                                             |          |                  |                                            |          |                  |                                            |          |                  |                             |          |                                                       |
| VAP <small>(Note 2)</small><br>(on 7 days)                       | CRITICAL                                                                                                                                                                                                                                                                                                                                                                                                                                                                                                                     | ⊕⊖⊖⊖<br>VERY LOW                                                                                                                                                                                                                                                                                                                                                                                                                                                                                                                                                                                                                                                                                                                                                                                                                                                                                                                                                                                                                                                                                                                                                                                                                                                                                                                                                                                                              |                                                                                                                                                                                                              |                                                                                                                                                                                                   |                                   |                                                                  |          |             |                                                                 |          |                  |                                                                 |          |                  |                                             |          |                  |                                            |          |                  |                                            |          |                  |                             |          |                                                       |
| VAP <small>(Note 2)</small><br>(on 4 days)                       | CRITICAL                                                                                                                                                                                                                                                                                                                                                                                                                                                                                                                     | ⊕⊖⊖⊖<br>VERY LOW                                                                                                                                                                                                                                                                                                                                                                                                                                                                                                                                                                                                                                                                                                                                                                                                                                                                                                                                                                                                                                                                                                                                                                                                                                                                                                                                                                                                              |                                                                                                                                                                                                              |                                                                                                                                                                                                   |                                   |                                                                  |          |             |                                                                 |          |                  |                                                                 |          |                  |                                             |          |                  |                                            |          |                  |                                            |          |                  |                             |          |                                                       |
| VFD <small>(Note 3)</small>                                      | CRITICAL                                                                                                                                                                                                                                                                                                                                                                                                                                                                                                                     | No studies <small>(Additional considerations)</small>                                                                                                                                                                                                                                                                                                                                                                                                                                                                                                                                                                                                                                                                                                                                                                                                                                                                                                                                                                                                                                                                                                                                                                                                                                                                                                                                                                         |                                                                                                                                                                                                              |                                                                                                                                                                                                   |                                   |                                                                  |          |             |                                                                 |          |                  |                                                                 |          |                  |                                             |          |                  |                                            |          |                  |                                            |          |                  |                             |          |                                                       |
| <b>DESIRABLE AND UNDESIRABLE EFFECTS</b>                         | <p><b>Is there important uncertainty about or variability in how much people value the main outcomes?</b></p> <p> <input type="radio"/> Important uncertainty or variability<br/> <input type="radio"/> Possibly important uncertainty or variability<br/> <input type="radio"/> Possibly no important uncertainty or variability<br/> <input checked="" type="radio"/> No important uncertainty or variability<br/>                     -----<br/> <input type="radio"/> No known undesirable outcomes                 </p> |                                                                                                                                                                                                                                                                                                                                                                                                                                                                                                                                                                                                                                                                                                                                                                                                                                                                                                                                                                                                                                                                                                                                                                                                                                                                                                                                                                                                                               | <p>We collected and analyzed reports associated with tracheostomy within 4, 7, and 10 days after the initiation of mechanical ventilation, and summarized the results at 4, 7, and 10 days respectively.</p> |                                                                                                                                                                                                   |                                   |                                                                  |          |             |                                                                 |          |                  |                                                                 |          |                  |                                             |          |                  |                                            |          |                  |                                            |          |                  |                             |          |                                                       |
|                                                                  | <p><b>How substantial are the desirable anticipated effects?</b></p> <p> <input checked="" type="radio"/> Trivial<br/> <input type="radio"/> Small<br/> <input type="radio"/> Moderate<br/> <input type="radio"/> Large<br/>                     -----<br/> <input type="radio"/> Varies<br/> <input type="radio"/> Don't know                 </p>                                                                                                                                                                          |                                                                                                                                                                                                                                                                                                                                                                                                                                                                                                                                                                                                                                                                                                                                                                                                                                                                                                                                                                                                                                                                                                                                                                                                                                                                                                                                                                                                                               |                                                                                                                                                                                                              | <p>Many patients with ARDS are included in the group of "patients who are anticipated to require long-term mechanical ventilation", the subjects in this CQ. However, patients with different</p> |                                   |                                                                  |          |             |                                                                 |          |                  |                                                                 |          |                  |                                             |          |                  |                                            |          |                  |                                            |          |                  |                             |          |                                                       |

|                                                                                                                                                                 |                                                                                                                                                                                                                                                                                                                                                                                                                       |                                                           |                                                           |                                                          |                                                          |                                                                                                                                                                                                                                                                                                                                                                                              |                                      |
|-----------------------------------------------------------------------------------------------------------------------------------------------------------------|-----------------------------------------------------------------------------------------------------------------------------------------------------------------------------------------------------------------------------------------------------------------------------------------------------------------------------------------------------------------------------------------------------------------------|-----------------------------------------------------------|-----------------------------------------------------------|----------------------------------------------------------|----------------------------------------------------------|----------------------------------------------------------------------------------------------------------------------------------------------------------------------------------------------------------------------------------------------------------------------------------------------------------------------------------------------------------------------------------------------|--------------------------------------|
| <p><b>How substantial are the undesirable anticipated effects?</b></p>                                                                                          | <p><input type="radio"/> Large<br/> <input type="radio"/> Moderate<br/> <input type="radio"/> Small<br/> <input type="radio"/> Trivial<br/>         -----<br/> <input type="radio"/> Varies<br/> <input checked="" type="radio"/> Don't know</p>                                                                                                                                                                      | <p><b>Summary of findings:</b></p>                        |                                                           |                                                          |                                                          | <p>backgrounds as “patients with prolonged alterations in consciousness after head trauma” are also included. Therefore, the degree of indirectness was classified as ‘serious’, especially in terms of VFD. It is difficult to extract data for patients with ARDS exclusively from the selected reports. Therefore, VFD was not used as a clinical outcome for this clinical question.</p> |                                      |
| <p><b>Does the balance between desirable and undesirable effects favor the intervention or the comparison?</b></p>                                              | <p><input type="radio"/> Favors the comparison<br/> <input type="radio"/> Probably favors the comparison<br/> <input checked="" type="radio"/> Does not favor either the intervention or the comparison<br/> <input type="radio"/> Probably favors the intervention<br/> <input type="radio"/> Favors the intervention<br/>         -----<br/> <input type="radio"/> Varies<br/> <input type="radio"/> Don't know</p> | <p>Outcome</p>                                            | <p>Late</p>                                               | <p>Early</p>                                             | <p>Absolute effect (95% CI)</p>                          |                                                                                                                                                                                                                                                                                                                                                                                              | <p>Relative effect (RR) (95% CI)</p> |
|                                                                                                                                                                 |                                                                                                                                                                                                                                                                                                                                                                                                                       | <p>Mortality (short-term) (Note 1)<br/>(on 10 days)</p>   | <p>275 / 1000</p>                                         | <p>237 / 1000<br/>(201 to 278)</p>                       | <p>39 fewer per 1000<br/>(from 3 more to 74 fewer)</p>   |                                                                                                                                                                                                                                                                                                                                                                                              | <p>RR 0.86<br/>(0.73 to 1.01)</p>    |
|                                                                                                                                                                 |                                                                                                                                                                                                                                                                                                                                                                                                                       | <p>156 / 1000</p>                                         | <p>134 / 1000<br/>(114 to 158)</p>                        | <p>22 fewer per 1000<br/>(from 2 more to 42 fewer)</p>   |                                                          |                                                                                                                                                                                                                                                                                                                                                                                              |                                      |
|                                                                                                                                                                 |                                                                                                                                                                                                                                                                                                                                                                                                                       | <p>308 / 1000</p>                                         | <p>265 / 1000<br/>(225 to 311)</p>                        | <p>43 fewer per 1000<br/>(from 3 more to 83 fewer)</p>   |                                                          |                                                                                                                                                                                                                                                                                                                                                                                              |                                      |
|                                                                                                                                                                 |                                                                                                                                                                                                                                                                                                                                                                                                                       | <p>Mortality (short-term) (Note 1)<br/>(on 7 days)</p>    | <p>292 / 1000</p>                                         | <p>243 / 1000<br/>(175 to 330)</p>                       | <p>50 fewer per 1000<br/>(from 38 more to 117 fewer)</p> |                                                                                                                                                                                                                                                                                                                                                                                              | <p>RR 0.83<br/>(0.60 to 1.13)</p>    |
|                                                                                                                                                                 |                                                                                                                                                                                                                                                                                                                                                                                                                       | <p>156 / 1000</p>                                         | <p>129 / 1000<br/>(94 to 176)</p>                         | <p>27 fewer per 1000<br/>(from 20 more to 62 fewer)</p>  |                                                          |                                                                                                                                                                                                                                                                                                                                                                                              |                                      |
|                                                                                                                                                                 |                                                                                                                                                                                                                                                                                                                                                                                                                       | <p>308 / 1000</p>                                         | <p>256 / 1000<br/>(185 to 348)</p>                        | <p>52 fewer per 1000<br/>(from 40 more to 123 fewer)</p> |                                                          |                                                                                                                                                                                                                                                                                                                                                                                              |                                      |
|                                                                                                                                                                 |                                                                                                                                                                                                                                                                                                                                                                                                                       | <p>Mortality (short-term) (Note 1)<br/>(on 4 days)</p>    | <p>313 / 1000</p>                                         | <p>232 / 1000<br/>(163 to 332)</p>                       | <p>81 fewer per 1000<br/>(from 19 more to 150 fewer)</p> |                                                                                                                                                                                                                                                                                                                                                                                              | <p>RR 0.74<br/>(0.52 to 1.06)</p>    |
|                                                                                                                                                                 |                                                                                                                                                                                                                                                                                                                                                                                                                       | <p>156 / 1000</p>                                         | <p>115 / 1000<br/>(81 to 165)</p>                         | <p>41 fewer per 1000<br/>(from 9 more to 75 fewer)</p>   |                                                          |                                                                                                                                                                                                                                                                                                                                                                                              |                                      |
|                                                                                                                                                                 |                                                                                                                                                                                                                                                                                                                                                                                                                       | <p>308 / 1000</p>                                         | <p>228 / 1000<br/>(160 to 326)</p>                        | <p>80 fewer per 1000<br/>(from 18 more to 148 fewer)</p> |                                                          |                                                                                                                                                                                                                                                                                                                                                                                              |                                      |
|                                                                                                                                                                 |                                                                                                                                                                                                                                                                                                                                                                                                                       | <p>VAP (Note 2)<br/>(on 10 days)</p>                      | <p>317 / 1000</p>                                         | <p>295 / 1000<br/>(244 to 352)</p>                       | <p>22 fewer per 1000<br/>(from 35 more to 73 fewer)</p>  |                                                                                                                                                                                                                                                                                                                                                                                              | <p>RR 0.93<br/>(0.77 to 1.11)</p>    |
|                                                                                                                                                                 |                                                                                                                                                                                                                                                                                                                                                                                                                       | <p>134 / 1000</p>                                         | <p>125 / 1000<br/>(103 to 149)</p>                        | <p>9 fewer per 1000<br/>(from 15 more to 31 fewer)</p>   |                                                          |                                                                                                                                                                                                                                                                                                                                                                                              |                                      |
|                                                                                                                                                                 |                                                                                                                                                                                                                                                                                                                                                                                                                       | <p>459 / 1000</p>                                         | <p>427 / 1000<br/>(353 to 509)</p>                        | <p>32 fewer per 1000<br/>(from 50 more to 106 fewer)</p> |                                                          |                                                                                                                                                                                                                                                                                                                                                                                              |                                      |
| <p>VAP (Note 2)<br/>(on 7 days)</p>                                                                                                                             | <p>550 / 1000</p>                                                                                                                                                                                                                                                                                                                                                                                                     | <p>467 / 1000<br/>(385 to 577)</p>                        | <p>82 fewer per 1000<br/>(from 27 more to 165 fewer)</p>  | <p>RR 0.85<br/>(0.70 to 1.05)</p>                        |                                                          |                                                                                                                                                                                                                                                                                                                                                                                              |                                      |
| <p>134 / 1000</p>                                                                                                                                               | <p>114 / 1000<br/>(94 to 141)</p>                                                                                                                                                                                                                                                                                                                                                                                     | <p>20 fewer per 1000<br/>(from 7 more to 40 fewer)</p>    |                                                           |                                                          |                                                          |                                                                                                                                                                                                                                                                                                                                                                                              |                                      |
| <p>459 / 1000</p>                                                                                                                                               | <p>390 / 1000<br/>(321 to 482)</p>                                                                                                                                                                                                                                                                                                                                                                                    | <p>69 fewer per 1000<br/>(from 23 more to 138 fewer)</p>  |                                                           |                                                          |                                                          |                                                                                                                                                                                                                                                                                                                                                                                              |                                      |
| <p>VAP (Note 2)<br/>(on 4 days)</p>                                                                                                                             | <p>507 / 1000</p>                                                                                                                                                                                                                                                                                                                                                                                                     | <p>385 / 1000<br/>(258 to 583)</p>                        | <p>122 fewer per 1000<br/>(from 76 more to 248 fewer)</p> | <p>RR 0.76<br/>(0.51 to 1.15)</p>                        |                                                          |                                                                                                                                                                                                                                                                                                                                                                                              |                                      |
| <p>134 / 1000</p>                                                                                                                                               | <p>102 / 1000<br/>(68 to 154)</p>                                                                                                                                                                                                                                                                                                                                                                                     | <p>32 fewer per 1000<br/>(from 20 more to 66 fewer)</p>   |                                                           |                                                          |                                                          |                                                                                                                                                                                                                                                                                                                                                                                              |                                      |
| <p>459 / 1000</p>                                                                                                                                               | <p>349 / 1000<br/>(234 to 528)</p>                                                                                                                                                                                                                                                                                                                                                                                    | <p>110 fewer per 1000<br/>(from 69 more to 225 fewer)</p> |                                                           |                                                          |                                                          |                                                                                                                                                                                                                                                                                                                                                                                              |                                      |
| <p><b>Summary:</b> Early tracheostomy, within 4, 7, or 10 days after the initiation of mechanical ventilation, in patients anticipated to require long-term</p> |                                                                                                                                                                                                                                                                                                                                                                                                                       |                                                           |                                                           |                                                          |                                                          |                                                                                                                                                                                                                                                                                                                                                                                              |                                      |

|                    |                                                                                           |                                                                                                                                                                                                                                                                                                                                                                                                   |                                                                                                                                                                                                                                                                                                                                                                                                                                                                                                                                                                                                                                                                                                            |  |
|--------------------|-------------------------------------------------------------------------------------------|---------------------------------------------------------------------------------------------------------------------------------------------------------------------------------------------------------------------------------------------------------------------------------------------------------------------------------------------------------------------------------------------------|------------------------------------------------------------------------------------------------------------------------------------------------------------------------------------------------------------------------------------------------------------------------------------------------------------------------------------------------------------------------------------------------------------------------------------------------------------------------------------------------------------------------------------------------------------------------------------------------------------------------------------------------------------------------------------------------------------|--|
|                    |                                                                                           |                                                                                                                                                                                                                                                                                                                                                                                                   | mechanical ventilation did not significantly reduce the short-term mortality or the incidence of VAP.                                                                                                                                                                                                                                                                                                                                                                                                                                                                                                                                                                                                      |  |
| RESOURCES REQUIRED | How large are the resource requirements (costs)?                                          | <input type="radio"/> Large costs<br><input type="radio"/> Moderate costs<br><input type="radio"/> Negligible costs and savings<br><input checked="" type="radio"/> Moderate savings<br><input type="radio"/> Large savings<br>-----<br><input type="radio"/> Varies<br><input type="radio"/> Don't know                                                                                          | The cost of performing a tracheostomy in Japan is about 25,000 yen. Probably, there is no need to purchase special equipment to perform tracheostomy because it is a routine procedure.                                                                                                                                                                                                                                                                                                                                                                                                                                                                                                                    |  |
|                    | Does the cost-effectiveness of the intervention favor the intervention or the comparison? | <input type="radio"/> Favors the comparison<br><input checked="" type="radio"/> Probably favors the comparison<br><input type="radio"/> Does not favor either the intervention or the comparison<br><input type="radio"/> Probably favors the intervention<br><input type="radio"/> Favors the intervention<br>-----<br><input type="radio"/> Varies<br><input type="radio"/> No included studies | Since the mortality rate and the incidence of VAP are not decreased by early tracheostomy, if all patients undergo early tracheostomy, the costs increase along with the increased number of unnecessary tracheostomies. It has been reported that 91% of patients underwent tracheostomy with the early tracheostomy strategy while 54% underwent tracheostomy with the late tracheostomy strategy <sup>5)</sup> . Thus, approximately 40% of tracheostomy performed with the early tracheostomy strategy might be unnecessary if the late tracheostomy strategy is used. Except for patients who clearly or probably benefit from tracheostomy, the cost of early tracheostomy is considered to be high. |  |
| EQUITY             | What would be the impact on health equity?                                                | <input type="radio"/> Reduced<br><input type="radio"/> Probably reduced<br><input type="radio"/> Probably no impact<br><input type="radio"/> Probably increased<br><input checked="" type="radio"/> Increased<br>-----<br><input type="radio"/> Varies<br><input type="radio"/> Don't know                                                                                                        | Special medical facilities or equipment are not required for this procedure.                                                                                                                                                                                                                                                                                                                                                                                                                                                                                                                                                                                                                               |  |
| ACCEPTABILITY      | Is the intervention acceptable to key stakeholders?                                       | <input type="radio"/> No<br><input type="radio"/> Probably no<br><input type="radio"/> Probably yes<br><input type="radio"/> Yes<br>-----<br><input checked="" type="radio"/> Varies<br><input type="radio"/> Don't know                                                                                                                                                                          | It cannot be said unconditionally because changes in the timing of tracheostomy have various influences on the stakeholders and the influences vary depending on their position.                                                                                                                                                                                                                                                                                                                                                                                                                                                                                                                           |  |
| FEASIBILITY        | Is the intervention feasible implement?                                                   | <input type="radio"/> No<br><input type="radio"/> Probably no<br><input type="radio"/> Probably yes<br><input checked="" type="radio"/> Yes<br>-----<br><input type="radio"/> Varies<br><input type="radio"/> Don't know                                                                                                                                                                          | Special medical facilities or equipment are not required for this procedure.                                                                                                                                                                                                                                                                                                                                                                                                                                                                                                                                                                                                                               |  |



## Recommendation

## CQ1: Should early tracheostomy be performed in adult patients with ARDS?

| Balance of consequences | Undesirable consequences clearly outweigh desirable consequences in most settings | Undesirable consequences probably outweigh desirable consequences in most settings | The balance between desirable and undesirable consequences is closely balanced or uncertain | Desirable consequences probably outweigh undesirable consequences in most settings | Desirable consequences clearly outweigh undesirable consequences in most settings |
|-------------------------|-----------------------------------------------------------------------------------|------------------------------------------------------------------------------------|---------------------------------------------------------------------------------------------|------------------------------------------------------------------------------------|-----------------------------------------------------------------------------------|
| Judgement               | ○                                                                                 | ○                                                                                  | ●                                                                                           | ○                                                                                  | ○                                                                                 |

| Type of recommendation | Strong recommendation against the intervention | Conditional recommendation against the intervention | Conditional recommendation for either the intervention or the comparison | Conditional recommendation for the intervention |
|------------------------|------------------------------------------------|-----------------------------------------------------|--------------------------------------------------------------------------|-------------------------------------------------|
| Judgement              | ○                                              | ●                                                   | ○                                                                        | ○                                               |

|                |                                                                                                                                                                    |
|----------------|--------------------------------------------------------------------------------------------------------------------------------------------------------------------|
| Recommendation | <b>We suggest against early tracheostomy in adult patients with ARDS. (GRADE 2C, Strength of recommendation “weak recommendation” / Quality of evidence “low”)</b> |
|----------------|--------------------------------------------------------------------------------------------------------------------------------------------------------------------|

|               |                                                                                                                                                                                                                                                                                                                                                                                                                                                                                                                                                                                                                                                                                                                                                                                                                                                                                                                                                                                                                                                                                                                                                                                                                                                                                                                                                                                                                                                                                                                                                                                                                                                                                                                                                                                                                                                                                                                                                                                                                                                                                                                                                                                                                                                                                                                                                                                                                                                                                                                                                                                                                                                                                                                                                                                                                                                                                                                                                                                                                                                                                                                                                                                                                                                                                                                                                                                                                             |
|---------------|-----------------------------------------------------------------------------------------------------------------------------------------------------------------------------------------------------------------------------------------------------------------------------------------------------------------------------------------------------------------------------------------------------------------------------------------------------------------------------------------------------------------------------------------------------------------------------------------------------------------------------------------------------------------------------------------------------------------------------------------------------------------------------------------------------------------------------------------------------------------------------------------------------------------------------------------------------------------------------------------------------------------------------------------------------------------------------------------------------------------------------------------------------------------------------------------------------------------------------------------------------------------------------------------------------------------------------------------------------------------------------------------------------------------------------------------------------------------------------------------------------------------------------------------------------------------------------------------------------------------------------------------------------------------------------------------------------------------------------------------------------------------------------------------------------------------------------------------------------------------------------------------------------------------------------------------------------------------------------------------------------------------------------------------------------------------------------------------------------------------------------------------------------------------------------------------------------------------------------------------------------------------------------------------------------------------------------------------------------------------------------------------------------------------------------------------------------------------------------------------------------------------------------------------------------------------------------------------------------------------------------------------------------------------------------------------------------------------------------------------------------------------------------------------------------------------------------------------------------------------------------------------------------------------------------------------------------------------------------------------------------------------------------------------------------------------------------------------------------------------------------------------------------------------------------------------------------------------------------------------------------------------------------------------------------------------------------------------------------------------------------------------------------------------------------|
| Justification | <p><b>Question:</b> Should early tracheostomy be performed in adult patients with ARDS?</p> <p><b>Patients:</b> Adult Patients who were anticipated to require prolonged mechanical ventilation</p> <p><b>Interventions:</b> early tracheostomy</p> <p><b>Comparison:</b> late tracheostomy</p> <p><b>Outcomes:</b> Short-term mortality<sup>(Note1)</sup>, VAP<sup>(Note2)</sup></p> <p><b>Summary of the evidence:</b> There was no study conducted in adult patients with ARDS. We conducted systematical review for RCTs which conducted in patients who are anticipated to require long-term mechanical ventilation, and then found 19 RCTs. Since the number of days from initiation of mechanical ventilation to tracheostomy is generally 14 days in Japan, the studies were divided into an early and late tracheostomy groups with using thresholds of 4, 7, and 10 days from commencement of mechanical ventilation.</p> <p>Early tracheostomy within 4, 7, and 10 days from the initial mechanical ventilation did not reduce the mortality and the incidence of VAP in compared with later tracheostomy. However, early tracheostomy is unlikely to worsen the patient outcome since the relative risk was less than 1.</p> <p><b>Quality of the evidence:</b> Overall, the selected studies had low risk of bias. Although the risk of bias for mortality was ‘not serious’, the risk of bias for VAP was downgraded by one level and classified as ‘serious’.</p> <p>Regarding with inconsistency of the results, heterogeneity for mortality (on 10 days) was low and ‘not serious’ as <math>I^2=19\%</math>. However, heterogeneity for the others was high as <math>I^2\geq 50\%</math>, thus, inconsistency of the results for them was downgraded by one level and classified as ‘serious’.</p> <p>Indirectness was considered as ‘serious’ in any of the outcomes because of the unmatched study subjects, as subjects included in selected RCTs were those anticipated to require long-term mechanical ventilation.</p> <p>The level of imprecision was downgraded by one level for all outcomes since the confidence intervals overlap with the clinical decision thresholds.</p> <p>For publication bias for the risk of VAP was downgraded by one level and classified as ‘serious’ because the result of the funnel plot test was asymmetric.</p> <p>To consider above aspects, the overall quality of evidence was evaluated as ‘low’.</p> <p><b>Judgement of benefit and harm, resources and cost:</b> Since ARDS patients requiring high oxygen concentration, high airway pressure, or high PEEP, they may have higher risk for tracheostomy, in compared with patients included in selected RCTs. As there is still no accurate methods to predict the long term mechanical ventilation, it is difficult to avoid the unnecessary tracheostomy, when early tracheostomy would be applied in all cases<sup>(6)</sup>. It would be considered that 40 % of tracheostomy in early tracheostomy arm could be avoidable in late tracheostomy arm. Therefore, it cannot be determined that the benefits of performing early tracheostomy outweigh the harms of performing it in patients with ARDS.</p> <p><b>Recommendations:</b> We suggest against early tracheostomy in adult patients with ARDS. (GRADE 2C, Strength of recommendation “weak recommendation” / Quality of evidence “low”)</p> |
|---------------|-----------------------------------------------------------------------------------------------------------------------------------------------------------------------------------------------------------------------------------------------------------------------------------------------------------------------------------------------------------------------------------------------------------------------------------------------------------------------------------------------------------------------------------------------------------------------------------------------------------------------------------------------------------------------------------------------------------------------------------------------------------------------------------------------------------------------------------------------------------------------------------------------------------------------------------------------------------------------------------------------------------------------------------------------------------------------------------------------------------------------------------------------------------------------------------------------------------------------------------------------------------------------------------------------------------------------------------------------------------------------------------------------------------------------------------------------------------------------------------------------------------------------------------------------------------------------------------------------------------------------------------------------------------------------------------------------------------------------------------------------------------------------------------------------------------------------------------------------------------------------------------------------------------------------------------------------------------------------------------------------------------------------------------------------------------------------------------------------------------------------------------------------------------------------------------------------------------------------------------------------------------------------------------------------------------------------------------------------------------------------------------------------------------------------------------------------------------------------------------------------------------------------------------------------------------------------------------------------------------------------------------------------------------------------------------------------------------------------------------------------------------------------------------------------------------------------------------------------------------------------------------------------------------------------------------------------------------------------------------------------------------------------------------------------------------------------------------------------------------------------------------------------------------------------------------------------------------------------------------------------------------------------------------------------------------------------------------------------------------------------------------------------------------------------------|

|                                                 |                                                                                                                                                                                                                                                                                                                                                                                                                                                                                                                                                                             |
|-------------------------------------------------|-----------------------------------------------------------------------------------------------------------------------------------------------------------------------------------------------------------------------------------------------------------------------------------------------------------------------------------------------------------------------------------------------------------------------------------------------------------------------------------------------------------------------------------------------------------------------------|
|                                                 | <b>Additional considerations:</b> None                                                                                                                                                                                                                                                                                                                                                                                                                                                                                                                                      |
| <b>Subgroup considerations</b>                  | None                                                                                                                                                                                                                                                                                                                                                                                                                                                                                                                                                                        |
| <b>Implementation considerations</b>            | For patients with severe ARDS presenting severe hypoxemia, cautious tracheostomy based on sufficient preparation will be required. When performing tracheostomy, informed consent from all persons concerned should be obtained, including medical staff as well as patient herself and her family.                                                                                                                                                                                                                                                                         |
| <b>Monitoring and evaluation considerations</b> | The standard monitoring for respiration and circulation generally carried out in ICU is appropriate.                                                                                                                                                                                                                                                                                                                                                                                                                                                                        |
| <b>Research possibilities</b>                   | A study to examine the optimal timing of tracheostomy in patients with ARDS is needed.<br>A method to accurately identify the patients requiring long-term mechanical ventilation is desired to be developed. With such a method, the number of unnecessary tracheostomy could be reduced and the evaluation regarding early tracheostomy could be changed.<br>There are mainly two types of tracheostomy: surgical tracheostomy and percutaneous tracheostomy. A study to investigate which type of tracheostomy is more safely performed in patients with ARDS is needed. |

Note 1) Among the deaths within 90 days, those assessed as a primary outcome in each study.

Note 2) VAP: ventilator associated pneumonia. The definition of VAP varies among the studies.

Note 3) Out of 28 days, the number of days for which the patient is not dependent on the mechanical ventilator. If the patient dies within 28 days, the number should be zero.

- Cheung NH, Napolitano LM: Tracheostomy: epidemiology, indications, timing, technique, and outcomes. *Respir Care* **59**(6): 895-915; discussion 916-899, 2014 PMID 24891198
- Freeman BD, Morris PE: Tracheostomy practice in adults with acute respiratory failure. *Crit Care Med* **40**(10): 2890-2896, 2012 PMID 22824938
- Epstein SK: Late complications of tracheostomy. *Respir Care* **50**(4): 542-549, 2005 PMID 15807919
- Stauffer JL, Olson DE, Petty TL: Complications and consequences of endotracheal intubation and tracheotomy. A prospective study of 150 critically ill adult patients. *Am J Med* **70**(1): 65-76, 1981 PMID 7457492
- Siempos I, Ntaidou TK, Filippidis FT, et al: Effect of early versus late or no tracheostomy on mortality and pneumonia of critically ill patients receiving mechanical ventilation: a systematic review and meta-analysis. *Lancet Respir Med* **3**(2): 150-158, 2015 PMID 25680911
- Figueroa-Casas JB, Dwivedi AK, Connery SM, et al: Predictive models of prolonged mechanical ventilation yield moderate accuracy. *J Crit Care* **30**(3): 502-505, 2015 PMID 25682346

## CQ02. Study flow diagram

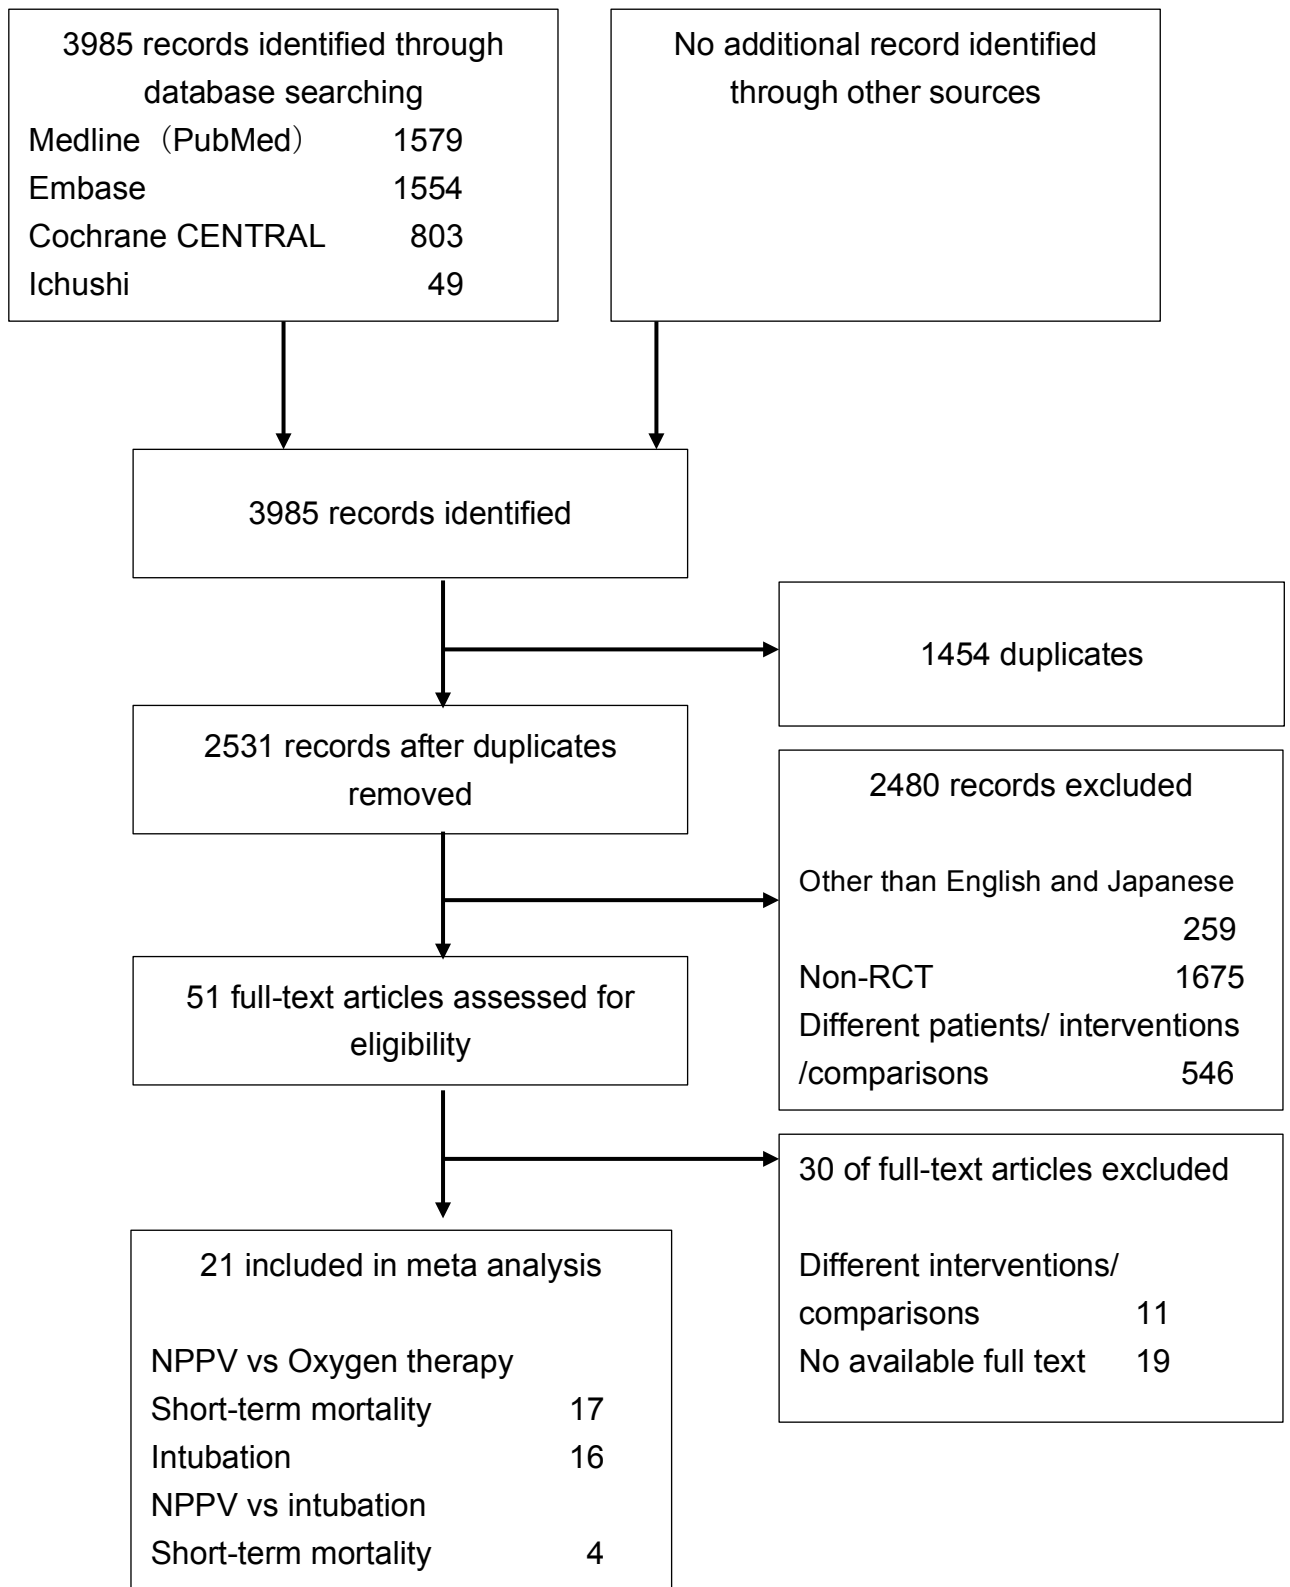

| Outcome | Short Term mortality       |                                                  | risk of bias                          |                                                  | not serious (0)               |                                                |                                                     |                                      |                                                           |
|---------|----------------------------|--------------------------------------------------|---------------------------------------|--------------------------------------------------|-------------------------------|------------------------------------------------|-----------------------------------------------------|--------------------------------------|-----------------------------------------------------------|
| 番号      | 著者名 発表年<br>(Forest plot表示) | risk of bias評価                                   |                                       |                                                  |                               |                                                |                                                     |                                      | 研究内でのバイアスの<br>リスク<br>Risk of bias within a<br>study       |
|         |                            | ランダム割付順序の<br>生成<br>random sequence<br>generation | 割り付けの隠蔽化<br>allocation<br>concealment | ブラインド<br>blinding                                |                               | 不完全なアウトカム<br>データ<br>incomplete outcome<br>data | 選択されたアウトカム<br>の報告<br>selective outcome<br>reporting | その他のバイアス<br>Other sources of<br>bias |                                                           |
|         |                            |                                                  |                                       | 研究参加者と治療提<br>供者<br>participants and<br>personnel | アウトカム評価者<br>outcome assessors |                                                |                                                     |                                      |                                                           |
| 1       | Antonelli 2000             | Low risk                                         | Low risk                              | High risk                                        | Low risk                      | Low risk                                       | Unclear risk                                        | Low risk                             | Unclear risk                                              |
| 2       | Brambilla 2014             | low risk                                         | Low risk                              | High risk                                        | Low risk                      | Low risk                                       | Low risk                                            | Low risk                             | Low risk                                                  |
| 3       | Confalonieri 1999          | Low risk                                         | Low risk                              | High risk                                        | Low risk                      | Low risk                                       | Unclear risk                                        | Low risk                             | Unclear risk                                              |
| 4       | Cosentini 2010             | Low risk                                         | Low risk                              | High risk                                        | Low risk                      | Low risk                                       | Low risk                                            | Low risk                             | Low risk                                                  |
| 5       | Delclaux 2000              | Low risk                                         | Low risk                              | High risk                                        | Low risk                      | Low risk                                       | Unclear risk                                        | Low risk                             | Unclear risk                                              |
| 6       | Ferrer 2003                | Unclear risk                                     | Unclear risk                          | High risk                                        | Low risk                      | Low risk                                       | Unclear risk                                        | Low risk                             | Unclear risk                                              |
| 7       | Gupta 2010                 | Low risk                                         | Low risk                              | High risk                                        | Low risk                      | Low risk                                       | Low risk                                            | Low risk                             | Low risk                                                  |
| 8       | Hernandez 2010             | Low risk                                         | Low risk                              | High risk                                        | Low risk                      | Low risk                                       | High risk                                           | Low risk                             | High risk                                                 |
| 9       | Hilbert 2001               | Unclear risk                                     | Low risk                              | High risk                                        | Low risk                      | Low risk                                       | Unclear risk                                        | Low risk                             | Unclear risk                                              |
| 10      | Kramer 1995                | Unclear risk                                     | Unclear risk                          | High risk                                        | Low risk                      | Low risk                                       | Unclear risk                                        | Low risk                             | Unclear risk                                              |
| 11      | Martin 2000                | Unclear risk                                     | Unclear risk                          | High risk                                        | Low risk                      | Low risk                                       | Unclear risk                                        | Low risk                             | Unclear risk                                              |
| 12      | Nava 2013                  | Low risk                                         | Low risk                              | High risk                                        | Low risk                      | Low risk                                       | Low risk                                            | Low risk                             | Low risk                                                  |
| 13      | Squadrone 2010             | Low risk                                         | Low risk                              | High risk                                        | Low risk                      | Low risk                                       | Unclear risk                                        | Low risk                             | Unclear risk                                              |
| 14      | Wermke 2012                | Low risk                                         | Unclear risk                          | High risk                                        | Low risk                      | Low risk                                       | Unclear risk                                        | Low risk                             | Unclear risk                                              |
| 15      | Wood 1998                  | Unclear risk                                     | Low risk                              | High risk                                        | Low risk                      | Low risk                                       | Unclear risk                                        | Low risk                             | Unclear risk                                              |
| 16      | Wysocki 1995               | Low risk                                         | Unclear risk                          | High risk                                        | Low risk                      | Low risk                                       | Unclear risk                                        | Low risk                             | Unclear risk                                              |
| 17      | Zhan 2012                  | Unclear risk                                     | Low risk                              | High risk                                        | Low risk                      | Low risk                                       | Unclear risk                                        | Low risk                             | Unclear risk                                              |
|         |                            |                                                  |                                       |                                                  |                               |                                                |                                                     |                                      |                                                           |
| 番号      | 著者名 発表年<br>(Forest plot表示) | risk of biasコメント                                 |                                       |                                                  |                               |                                                |                                                     |                                      |                                                           |
| 1       | Antonelli 2000             | コンピュータで作成                                        | 封筒法                                   | NIVという治療の特性上、患者、担当者へのblindingは不可能                | 評価者に対するブラインドによって、アウトカムは影響されない | データ欠損の報告なし                                     | 研究計画書を得られなかった                                       | 全項目ほぼLow risk                        | High riskが1つ、unclearが1つあり、バイアスの程度を評価できない                  |
| 2       | Brambilla 2014             | random number generatorを利用                       | 封筒法                                   | NIVという治療の特性上、患者、担当者へのblindingは不可能                | 評価者に対するブラインドによって、アウトカムは影響されない | データ欠損の報告なし                                     | 研究計画書どおり (NCT01383213)                              | 全項目ほぼLow risk                        | ブラインド以外は全てLow risk。研究参加者と治療提供者に対するブラインドは、NIVの特性上ほぼ不可能である。 |
| 3       | Confalonieri 1999          | ソフトウェア(RND)を利用                                   | 封筒法                                   | NIVという治療の特性上、患者、担当者へのblindingは不可能                | 評価者に対するブラインドによって、アウトカムは影響されない | データ欠損の報告なし                                     | 研究計画書を得られなかった                                       | 全項目ほぼLow risk                        | High riskが1つ、unclearが1つあり、バイアスの程度を評価できない                  |
| 4       | Cosentini 2010             | コンピュータで作成                                        | 封筒法                                   | NIVという治療の特性上、患者、担当者へのblindingは不可能                | 評価者に対するブラインドによって、アウトカムは影響されない | データ欠損の報告なし                                     | 研究計画書どおり (NCT00803564)                              | 全項目ほぼLow risk                        | ブラインド以外は全てLow risk。研究参加者と治療提供者に対するブラインドは、NIVの特性上ほぼ不可能である。 |
| 5       | Delclaux 2000              | コンピュータで作成                                        | 封筒法                                   | NIVという治療の特性上、患者、担当者へのblindingは不可能                | 評価者に対するブラインドによって、アウトカムは影響されない | データ欠損の報告なし                                     | 研究計画書を得られなかった                                       | 全項目ほぼLow risk                        | High riskが1つ、unclearが1つあり、バイアスの程度を評価できない                  |
| 6       | Ferrer 2003                | 不明                                               | 不明                                    | NIVという治療の特性上、患者、担当者へのblindingは不可能                | 評価者に対するブラインドによって、アウトカムは影響されない | データ欠損の報告なし                                     | 研究計画書を得られなかった                                       | 全項目ほぼLow risk                        | Unclearの項目が多く、バイアスの程度を評価できない                              |
| 7       | Gupta 2010                 | コンピュータで作成                                        | 封筒法                                   | NIVという治療の特性上、患者、担当者へのblindingは不可能                | 評価者に対するブラインドによって、アウトカムは影響されない | データ欠損の報告なし                                     | 研究計画書どおり (NCT00510991)                              | 全項目ほぼLow risk                        | ブラインド以外は全てLow risk。研究参加者と治療提供者に対するブラインドは、NIVの特性上ほぼ不可能である。 |
| 8       | Hernandez 2010             | random number generatorを利用                       | 中央割り付け                                | NIVという治療の特性上、患者、担当者へのblindingは不可能                | 評価者に対するブラインドによって、アウトカムは影響されない | データ欠損の報告なし                                     | 採算の判定期間が、研究計画書(NCT 00557752)と実際とは異なっている。            | 全項目ほぼLow risk                        | High riskが2つあり、risk of biasは高いと考えられる                      |
| 9       | Hilbert 2001               | 不明                                               | 封筒法                                   | NIVという治療の特性上、患者、担当者へのblindingは不可能                | 評価者に対するブラインドによって、アウトカムは影響されない | データ欠損の報告なし                                     | 研究計画書を得られなかった                                       | 全項目ほぼLow risk                        | Unclearの項目が多く、バイアスの程度を評価できない                              |
| 10      | Kramer 1995                | 不明                                               | 不明                                    | NIVという治療の特性上、患者、担当者へのblindingは不可能                | 評価者に対するブラインドによって、アウトカムは影響されない | データ欠損の報告なし                                     | 研究計画書を得られなかった                                       | 全項目ほぼLow risk                        | Unclearの項目が多く、バイアスの程度を評価できない                              |
| 11      | Martin 2000                | 不明                                               | 不明                                    | NIVという治療の特性上、患者、担当者へのblindingは不可能                | 評価者に対するブラインドによって、アウトカムは影響されない | データ欠損の報告なし                                     | 研究計画書を得られなかった                                       | 全項目ほぼLow risk                        | Unclearの項目が多く、バイアスの程度を評価できない                              |
| 12      | Nava 2013                  | コンピュータで作成                                        | 封筒法                                   | NIVという治療の特性上、患者、担当者へのblindingは不可能                | 評価者に対するブラインドによって、アウトカムは影響されない | データ欠損の報告なし                                     | 研究計画書どおり (NCT00533143)                              | 全項目ほぼLow risk                        | ブラインド以外は全てLow risk。研究参加者と治療提供者に対するブラインドは、NIVの特性上ほぼ不可能である。 |
| 13      | Squadrone 2010             | コンピュータで作成                                        | 中央割り付け                                | NIVという治療の特性上、患者、担当者へのblindingは不可能                | 評価者に対するブラインドによって、アウトカムは影響されない | データ欠損の報告なし                                     | 研究計画書を得られなかった                                       | 全項目ほぼLow risk                        | High riskが1つ、unclearが1つあり、バイアスの程度を評価できない                  |
| 14      | Wermke 2012                | コンピュータで作成                                        | 不明                                    | NIVという治療の特性上、患者、担当者へのblindingは不可能                | 評価者に対するブラインドによって、アウトカムは影響されない | データ欠損の報告なし                                     | 研究計画書を得られなかった                                       | 全項目ほぼLow risk                        | Unclearの項目が多く、バイアスの程度を評価できない                              |
| 15      | Wood 1998                  | 不明                                               | 封筒法                                   | NIVという治療の特性上、患者、担当者へのblindingは不可能                | 評価者に対するブラインドによって、アウトカムは影響されない | データ欠損の報告なし                                     | 研究計画書を得られなかった                                       | 全項目ほぼLow risk                        | Unclearの項目が多く、バイアスの程度を評価できない                              |
| 16      | Wysocki 1995               | 乱数表を用いて作成                                        | 不明                                    | NIVという治療の特性上、患者、担当者へのblindingは不可能                | 評価者に対するブラインドによって、アウトカムは影響されない | データ欠損の報告なし                                     | 研究計画書を得られなかった                                       | 全項目ほぼLow risk                        | Unclearの項目が多く、バイアスの程度を評価できない                              |
| 17      | Zhan 2012                  | 不明                                               | 中央割り付け                                | NIVという治療の特性上、患者、担当者へのblindingは不可能                | 評価者に対するブラインドによって、アウトカムは影響されない | データ欠損の報告なし                                     | 研究計画書を得られなかった                                       | 全項目ほぼLow risk                        | Unclearの項目が多く、バイアスの程度を評価できない                              |

| Outcome |                            | Intubation                                |                                    | risk of bias                              |                                          | serious (-1)                            |                                              |                                   |                                                            |
|---------|----------------------------|-------------------------------------------|------------------------------------|-------------------------------------------|------------------------------------------|-----------------------------------------|----------------------------------------------|-----------------------------------|------------------------------------------------------------|
| 番号      | 著者名 発表年<br>(Forest plot表示) | risk of bias評価                            |                                    |                                           |                                          |                                         |                                              |                                   |                                                            |
|         |                            | ランダム割付順序の生成<br>random sequence generation | 割り付けの隠蔽化<br>allocation concealment | ブラインド<br>blinding                         |                                          | 不完全なアウトカムデータ<br>incomplete outcome data | 選択されたアウトカムの報告<br>selective outcome reporting | その他のバイアス<br>Other sources of bias | 研究内でのバイアスのリスク<br>Risk of bias within a study               |
|         |                            |                                           |                                    | 研究参加者と治療提供者<br>participants and personnel | アウトカム評価者<br>outcome assessors            |                                         |                                              |                                   |                                                            |
| 1       | Antonelli 2000             | Low risk                                  | Low risk                           | High risk                                 | Unclear risk                             | Low risk                                | Unclear risk                                 | Low risk                          | Unclear risk                                               |
| 2       | Brambilla 2014             | low risk                                  | Low risk                           | High risk                                 | Low risk                                 | Low risk                                | Low risk                                     | Low risk                          | Low risk                                                   |
| 3       | Confalonieri 1999          | Low risk                                  | Low risk                           | High risk                                 | High risk                                | Low risk                                | Unclear risk                                 | Low risk                          | High risk                                                  |
| 4       | Cosentini 2010             | Low risk                                  | Low risk                           | High risk                                 | Unclear risk                             | Low risk                                | Low risk                                     | Low risk                          | Unclear risk                                               |
| 5       | Delclaux 2000              | Low risk                                  | Low risk                           | High risk                                 | Unclear risk                             | Low risk                                | Unclear risk                                 | Low risk                          | Unclear risk                                               |
| 6       | Ferrer 2003                | Unclear risk                              | Unclear risk                       | High risk                                 | Unclear risk                             | Low risk                                | Unclear risk                                 | Low risk                          | Unclear risk                                               |
| 7       | Gupta 2010                 | Low risk                                  | Low risk                           | High risk                                 | Unclear risk                             | Low risk                                | Low risk                                     | Low risk                          | Unclear risk                                               |
| 8       | Hernandez 2010             | Low risk                                  | Low risk                           | High risk                                 | Low risk                                 | Low risk                                | High risk                                    | Low risk                          | High risk                                                  |
| 9       | Hilbert 2001               | Unclear risk                              | Low risk                           | High risk                                 | Low risk                                 | Low risk                                | Unclear risk                                 | Low risk                          | Unclear risk                                               |
| 10      | Kramer 1995                | Unclear risk                              | Unclear risk                       | High risk                                 | High risk                                | Low risk                                | Unclear risk                                 | Low risk                          | High risk                                                  |
| 11      | Martin 2000                | Unclear risk                              | Unclear risk                       | High risk                                 | High risk                                | Low risk                                | Unclear risk                                 | Low risk                          | High risk                                                  |
| 13      | Squadrone 2010             | Low risk                                  | Low risk                           | High risk                                 | Low risk                                 | Low risk                                | Unclear risk                                 | Low risk                          | Unclear risk                                               |
| 14      | Wermke 2012                | Low risk                                  | Unclear risk                       | High risk                                 | High risk                                | Low risk                                | Unclear risk                                 | Low risk                          | High risk                                                  |
| 15      | Wood 1998                  | Unclear risk                              | Low risk                           | High risk                                 | High risk                                | Low risk                                | Unclear risk                                 | Low risk                          | High risk                                                  |
| 16      | Wysocki 1995               | Low risk                                  | Unclear risk                       | High risk                                 | Low risk                                 | Low risk                                | Unclear risk                                 | Low risk                          | Unclear risk                                               |
| 17      | Zhan 2012                  | Unclear risk                              | Low risk                           | High risk                                 | High risk                                | Low risk                                | Unclear risk                                 | Low risk                          | High risk                                                  |
|         |                            |                                           |                                    |                                           |                                          |                                         |                                              |                                   |                                                            |
| 番号      | 著者名 発表年<br>(Forest plot表示) | risk of biasコメント                          |                                    |                                           |                                          |                                         |                                              |                                   |                                                            |
| 1       | Antonelli 2000             | コンピューターで作成                                | 封筒法                                | NIVという治療の特性上、患者、担当者へのblindは不可能            | 挿管の判断をする担当者の記載がない                        | データ欠損の報告なし                              | 研究計画書を得られなかった                                | 全項目ほぼLow risk                     | Unclearの項目が多く、バイアスの程度を評価できない                               |
| 2       | Brambilla 2014             | random number generatorを利用                | 封筒法                                | NIVという治療の特性上、患者、担当者へのblindは不可能            | 挿管の判断をするsenior physiciansには介入がブラインドされている | データ欠損の報告なし                              | 研究計画書どおり(NCT01383213)                        | 全項目ほぼLow risk                     | ブラインド以外は全てLow risk. 研究参加者と治療提供者に対するブラインドは、NIVの特性上ほぼ不可能である。 |
| 3       | Confalonieri 1999          | ソフトウェア(RND)を利用                            | 封筒法                                | NIVという治療の特性上、患者、担当者へのblindは不可能            | 担当医と研究者によって挿管が決定                         | データ欠損の報告なし                              | 研究計画書を得られなかった                                | 全項目ほぼLow risk                     | High riskが2つあり、risk of biasは高いと考えられる                       |
| 4       | Cosentini 2010             | コンピューターで作成                                | 封筒法                                | NIVという治療の特性上、患者、担当者へのblindは不可能            | 挿管の判断をする医師は不明                            | データ欠損の報告なし                              | 研究計画書どおり(NCT00603564)                        | 全項目ほぼLow risk                     | high riskが1つ、unclearが1つあり、バイアスの程度を評価できない                   |
| 5       | Delclaux 2000              | コンピューターで作成                                | 封筒法                                | NIVという治療の特性上、患者、担当者へのblindは不可能            | 挿管基準は決まっているものの、挿管の判断をする医師は不明             | データ欠損の報告なし                              | 研究計画書を得られなかった                                | 全項目ほぼLow risk                     | Unclearの項目が多く、バイアスの程度を評価できない                               |
| 6       | Ferrer 2003                | 不明                                        | 不明                                 | NIVという治療の特性上、患者、担当者へのblindは不可能            | 挿管基準は決まっているものの、挿管の判断をする医師は不明             | データ欠損の報告なし                              | 研究計画書を得られなかった                                | 全項目ほぼLow risk                     | Unclearの項目が多く、バイアスの程度を評価できない                               |
| 7       | Gupta 2010                 | コンピューターで作成                                | 封筒法                                | NIVという治療の特性上、患者、担当者へのblindは不可能            | 挿管基準-判断をする医師者が不明                         | データ欠損の報告なし                              | 研究計画書どおり(NCT00510991)                        | 全項目ほぼLow risk                     | high riskが1つ、unclearが1つあり、バイアスの程度を評価できない                   |
| 8       | Hernandez 2010             | random number generatorを利用                | 中央割り付け                             | NIVという治療の特性上、患者、担当者へのblindは不可能            | 挿管基準が明確                                  | データ欠損の報告なし                              | 挿管の判定期間が、研究計画書(NCT 00557752)と実際とは異なっている。     | 全項目ほぼLow risk                     | High riskが2つあり、risk of biasは高いと考えられる                       |
| 9       | Hilbert 2001               | 不明                                        | 封筒法                                | NIVという治療の特性上、患者、担当者へのblindは不可能            | 挿管基準が明確                                  | データ欠損の報告なし                              | 研究計画書を得られなかった                                | 全項目ほぼLow risk                     | Unclearの項目が多く、バイアスの程度を評価できない                               |
| 10      | Kramer 1995                | 不明                                        | 不明                                 | NIVという治療の特性上、患者、担当者へのblindは不可能            | 担当医によって挿管が決定                             | データ欠損の報告なし                              | 研究計画書を得られなかった                                | 全項目ほぼLow risk                     | High riskが2つあり、risk of biasは高いと考えられる                       |
| 11      | Martin 2000                | 不明                                        | 不明                                 | NIVという治療の特性上、患者、担当者へのblindは不可能            | 担当医によって挿管が決定                             | データ欠損の報告なし                              | 研究計画書を得られなかった                                | 全項目ほぼLow risk                     | High riskが2つあり、risk of biasは高いと考えられる                       |
| 13      | Squadrone 2010             | コンピューターで作成                                | 中央割り付け                             | NIVという治療の特性上、患者、担当者へのblindは不可能            | 挿管基準が明確                                  | データ欠損の報告なし                              | 研究計画書を得られなかった                                | 全項目ほぼLow risk                     | high riskが1つ、unclearが1つあり、バイアスの程度を評価できない                   |
| 14      | Wermke 2012                | コンピューターで作成                                | 不明                                 | NIVという治療の特性上、患者、担当者へのblindは不可能            | 挿管基準は存在するが、判断する担当者の主観が関与する項目がある          | データ欠損の報告なし                              | 研究計画書を得られなかった                                | 全項目ほぼLow risk                     | High riskが2つあり、risk of biasは高いと考えられる                       |
| 15      | Wood 1998                  | 不明                                        | 封筒法                                | NIVという治療の特性上、患者、担当者へのblindは不可能            | 挿管基準は存在するが、判断する担当者の主観が関与する項目がある          | データ欠損の報告なし                              | 研究計画書を得られなかった                                | 全項目ほぼLow risk                     | High riskが2つあり、risk of biasは高いと考えられる                       |
| 16      | Wysocki 1995               | 乱数表を用いて作成                                 | 不明                                 | NIVという治療の特性上、患者、担当者へのblindは不可能            | 挿管基準が明確                                  | データ欠損の報告なし                              | 研究計画書を得られなかった                                | 全項目ほぼLow risk                     | Unclearの項目が多く、バイアスの程度を評価できない                               |

| Outcome |                            | Short term mortality                      |                                    | risk of bias                              |                               | not serious (0)                         |                                              |                                   |                                              |
|---------|----------------------------|-------------------------------------------|------------------------------------|-------------------------------------------|-------------------------------|-----------------------------------------|----------------------------------------------|-----------------------------------|----------------------------------------------|
| 番号      | 著者名 発表年<br>(Forest plot表示) | risk of bias評価                            |                                    |                                           |                               |                                         |                                              |                                   |                                              |
|         |                            | ランダム割付順序の生成<br>random sequence generation | 割り付けの隠蔽化<br>allocation concealment | ブラインド<br>blinding                         |                               | 不完全なアウトカムデータ<br>incomplete outcome data | 選択されたアウトカムの報告<br>selective outcome reporting | その他のバイアス<br>Other sources of bias | 研究内でのバイアスのリスク<br>Risk of bias within a study |
|         |                            |                                           |                                    | 研究参加者と治療提供者<br>participants and personnel | アウトカム評価者<br>outcome assessors |                                         |                                              |                                   |                                              |
| 1       | Antonelli 1998             | unclear risk                              | Unclear risk                       | High risk                                 | Low risk                      | Low risk                                | Unclear risk                                 | Low risk                          | Unclear risk                                 |
| 2       | Gunduz 2005                | Unclear risk                              | Unclear risk                       | High risk                                 | Low risk                      | Low risk                                | Unclear risk                                 | Low risk                          | Unclear risk                                 |
| 3       | Honrubia 2005              | Low risk                                  | Low risk                           | High risk                                 | Low risk                      | Low risk                                | Unclear risk                                 | High risk                         | High risk                                    |
| 4       | Matic 2007                 | Unclear risk                              | Low risk                           | High risk                                 | Low risk                      | Low risk                                | Unclear risk                                 | Low risk                          | Unclear risk                                 |
|         |                            |                                           |                                    |                                           |                               |                                         |                                              |                                   |                                              |
| 番号      | 著者名 発表年<br>(Forest plot表示) | risk of biasコメント                          |                                    |                                           |                               |                                         |                                              |                                   |                                              |
| 1       | Antonelli 1998             | ランダム化の方法が未記載                              | 割り付けの隠蔽化についての記載なし                  | NIVという治療の特性上、患者、担当者へのblindは不可能            | 評価者に対するブラインドによって、アウトカムは影響されない | データ欠損の報告なし                              | 研究計画書を得られなかった                                | 全項目 ほぼLow risk                    | Unclearの項目が多く、バイアスの程度を評価できない                 |
| 2       | Gunduz 2005                | 不明                                        | 不明                                 | NIVという治療の特性上、患者、担当者へのblindは不可能            | 評価者に対するブラインドによって、アウトカムは影響されない | データ欠損の報告なし                              | 研究計画書を得られなかった                                | 全項目 ほぼLow risk                    | Unclearの項目が多く、バイアスの程度を評価できない                 |
| 3       | Honrubia 2005              | コンピュータで作成                                 | 中央割り付け                             | NIVという治療の特性上、患者、担当者へのblindは不可能            | 評価者に対するブラインドによって、アウトカムは影響されない | データ欠損の報告なし                              | 研究計画書を得られなかった                                | 途中で打ち切り                           | High riskが2つあり、risk of biasは高いと考えられる         |
| 4       | Matic 2007                 | 不明                                        | 封筒法                                | NIVという治療の特性上、患者、担当者へのblindは不可能            | 評価者に対するブラインドによって、アウトカムは影響されない | データ欠損の報告なし                              | 研究計画書を得られなかった                                | 全項目 ほぼLow risk                    | バイアスの程度を評価できない                               |

# Short term mortality (NPPV vs Oxygen therapy)

|                   | Random sequence generation (selection bias) | Allocation concealment (selection bias) | Blinding of participants and personnel (performance bias) | Blinding of outcome assessment (detection bias) | Incomplete outcome data (attrition bias) | Selective reporting (reporting bias) | Other bias |
|-------------------|---------------------------------------------|-----------------------------------------|-----------------------------------------------------------|-------------------------------------------------|------------------------------------------|--------------------------------------|------------|
| Antonelli 2000    | +                                           | +                                       | -                                                         | +                                               | +                                        | ?                                    | +          |
| Brambilla 2014    | +                                           | +                                       | -                                                         | +                                               | +                                        | +                                    | +          |
| Confalonieri 1999 | +                                           | +                                       | -                                                         | +                                               | +                                        | ?                                    | +          |
| Cosentini 2010    | +                                           | +                                       | -                                                         | +                                               | +                                        | +                                    | +          |
| Delclaux 2000     | +                                           | +                                       | -                                                         | +                                               | +                                        | ?                                    | +          |
| Ferrer 2003       | ?                                           | ?                                       | -                                                         | +                                               | +                                        | ?                                    | +          |
| Gupta 2010        | +                                           | +                                       | -                                                         | +                                               | +                                        | +                                    | +          |
| Hernandez 2010    | +                                           | +                                       | -                                                         | +                                               | +                                        | -                                    | +          |
| Hilbert 2001      | ?                                           | +                                       | -                                                         | +                                               | +                                        | ?                                    | +          |
| Kramer 1995       | ?                                           | ?                                       | -                                                         | +                                               | +                                        | ?                                    | +          |
| Martin 2000       | ?                                           | ?                                       | -                                                         | +                                               | +                                        | ?                                    | +          |
| Nava 2013         | +                                           | +                                       | -                                                         | +                                               | +                                        | +                                    | +          |
| Squadrone 2010    | +                                           | +                                       | -                                                         | +                                               | +                                        | +                                    | +          |
| Wermke 2012       | +                                           | ?                                       | -                                                         | +                                               | +                                        | ?                                    | +          |
| Wood 1998         | ?                                           | +                                       | -                                                         | +                                               | +                                        | ?                                    | +          |
| Wysocki 1995      | +                                           | ?                                       | -                                                         | +                                               | +                                        | ?                                    | +          |
| Zhan 2012         | ?                                           | +                                       | -                                                         | +                                               | +                                        | ?                                    | +          |

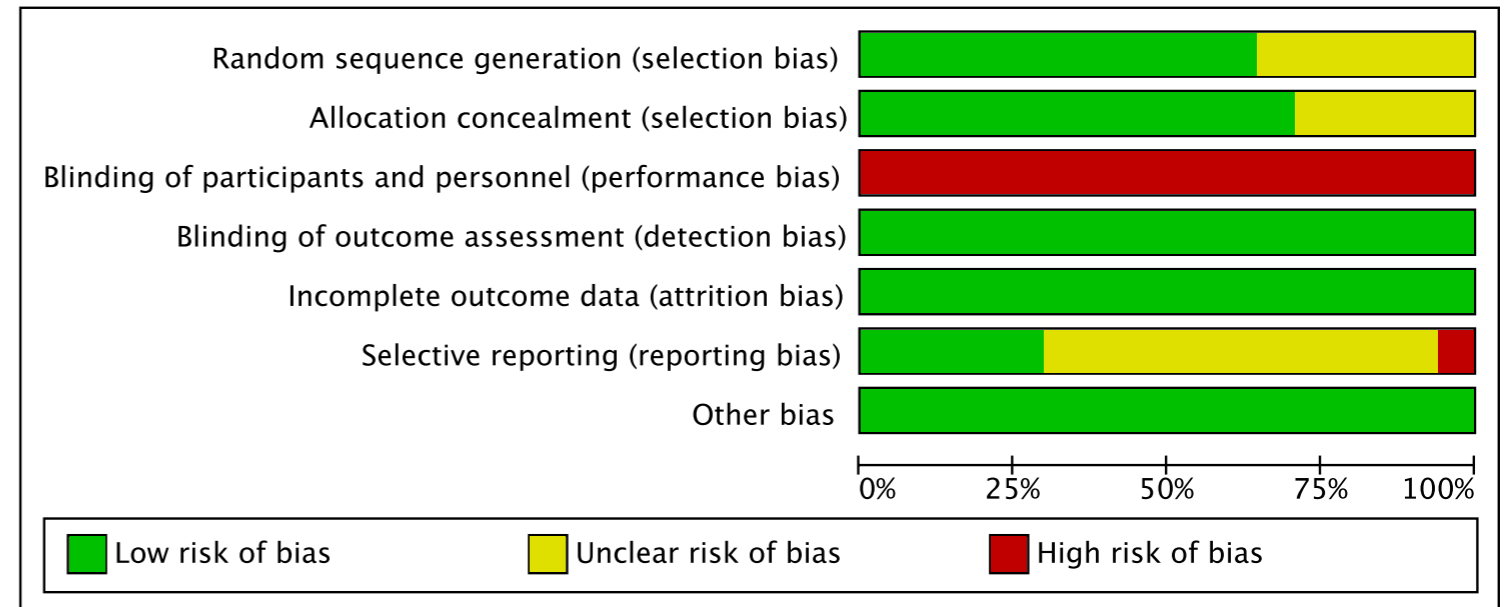

# Intubation (NPPV vs Oxygen therapy)

|                   | Random sequence generation (selection bias) | Allocation concealment (selection bias) | Blinding of participants and personnel (performance bias) | Blinding of outcome assessment (detection bias) | Incomplete outcome data (attrition bias) | Selective reporting (reporting bias) | Other bias |
|-------------------|---------------------------------------------|-----------------------------------------|-----------------------------------------------------------|-------------------------------------------------|------------------------------------------|--------------------------------------|------------|
| Antonelli 2000    | +                                           | +                                       | -                                                         | ?                                               | +                                        | ?                                    | +          |
| Brambilla 2014    | +                                           | +                                       | -                                                         | +                                               | +                                        | +                                    | +          |
| Confalonieri 1999 | +                                           | +                                       | -                                                         | -                                               | +                                        | ?                                    | +          |
| Cosentini 2010    | +                                           | +                                       | -                                                         | ?                                               | +                                        | +                                    | +          |
| Delclaux 2000     | +                                           | +                                       | -                                                         | ?                                               | +                                        | ?                                    | +          |
| Ferrer 2003       | ?                                           | ?                                       | -                                                         | ?                                               | +                                        | ?                                    | +          |
| Gupta 2010        | +                                           | +                                       | -                                                         | ?                                               | +                                        | +                                    | +          |
| Hernandez 2010    | +                                           | +                                       | -                                                         | +                                               | +                                        | -                                    | +          |
| Hilbert 2001      | ?                                           | +                                       | -                                                         | +                                               | +                                        | ?                                    | +          |
| Kramer 1995       | ?                                           | ?                                       | -                                                         | -                                               | +                                        | ?                                    | +          |
| Martin 2000       | ?                                           | ?                                       | -                                                         | -                                               | +                                        | ?                                    | +          |
| Squadrone 2010    | +                                           | +                                       | -                                                         | +                                               | +                                        | +                                    | +          |
| Wermke 2012       | +                                           | ?                                       | -                                                         | -                                               | +                                        | ?                                    | +          |
| Wood 1998         | ?                                           | +                                       | -                                                         | -                                               | +                                        | ?                                    | +          |
| Wysocki 1995      | +                                           | ?                                       | -                                                         | +                                               | +                                        | ?                                    | +          |
| Zhan 2012         | ?                                           | +                                       | -                                                         | +                                               | +                                        | ?                                    | +          |

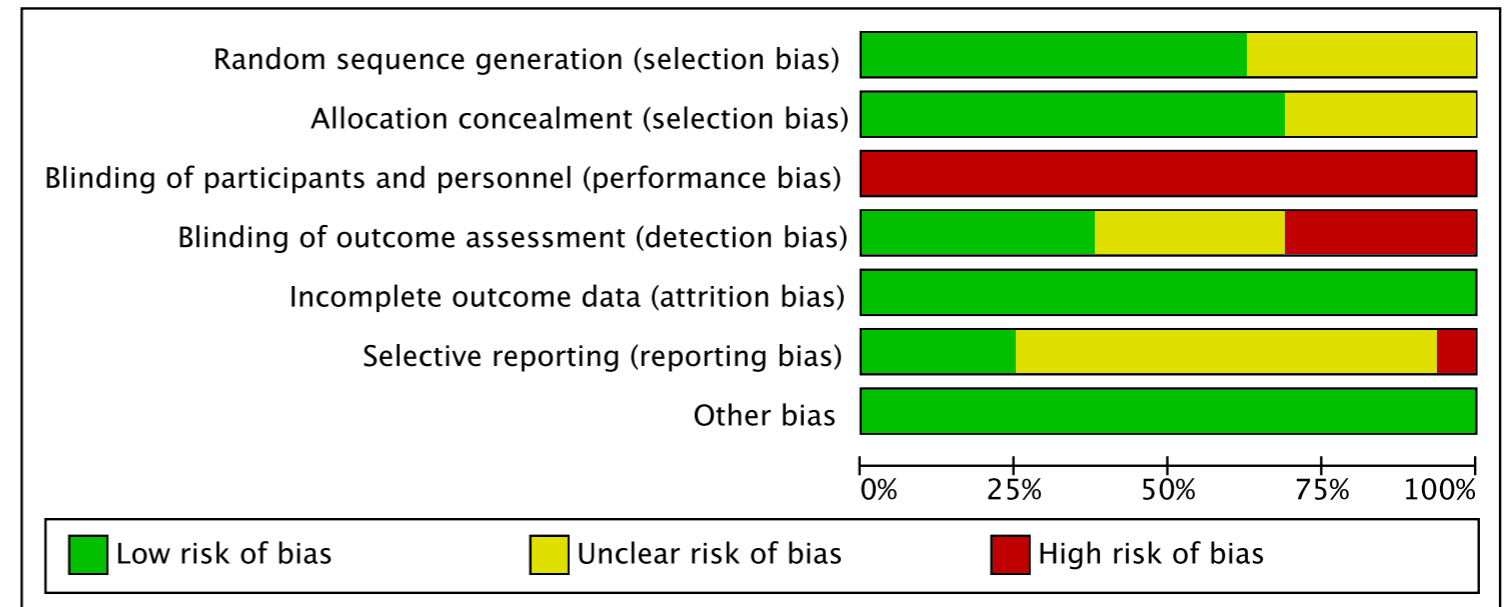



## Short term mortality (NPPV vs Intubation)

|                | Random sequence generation (selection bias) | Allocation concealment (selection bias) | Blinding of participants and personnel (performance bias) | Blinding of outcome assessment (detection bias) | Incomplete outcome data (attrition bias) | Selective reporting (reporting bias) | Other bias |
|----------------|---------------------------------------------|-----------------------------------------|-----------------------------------------------------------|-------------------------------------------------|------------------------------------------|--------------------------------------|------------|
| Antonelli 1998 | ?                                           | ?                                       | -                                                         | +                                               | +                                        | ?                                    | +          |
| Gunduz 2005    | ?                                           | ?                                       | -                                                         | +                                               | +                                        | ?                                    | +          |
| Honrubia 2005  | +                                           | +                                       | -                                                         | +                                               | +                                        | ?                                    | -          |
| Matic 2007     | ?                                           | +                                       | -                                                         | +                                               | +                                        | ?                                    | +          |

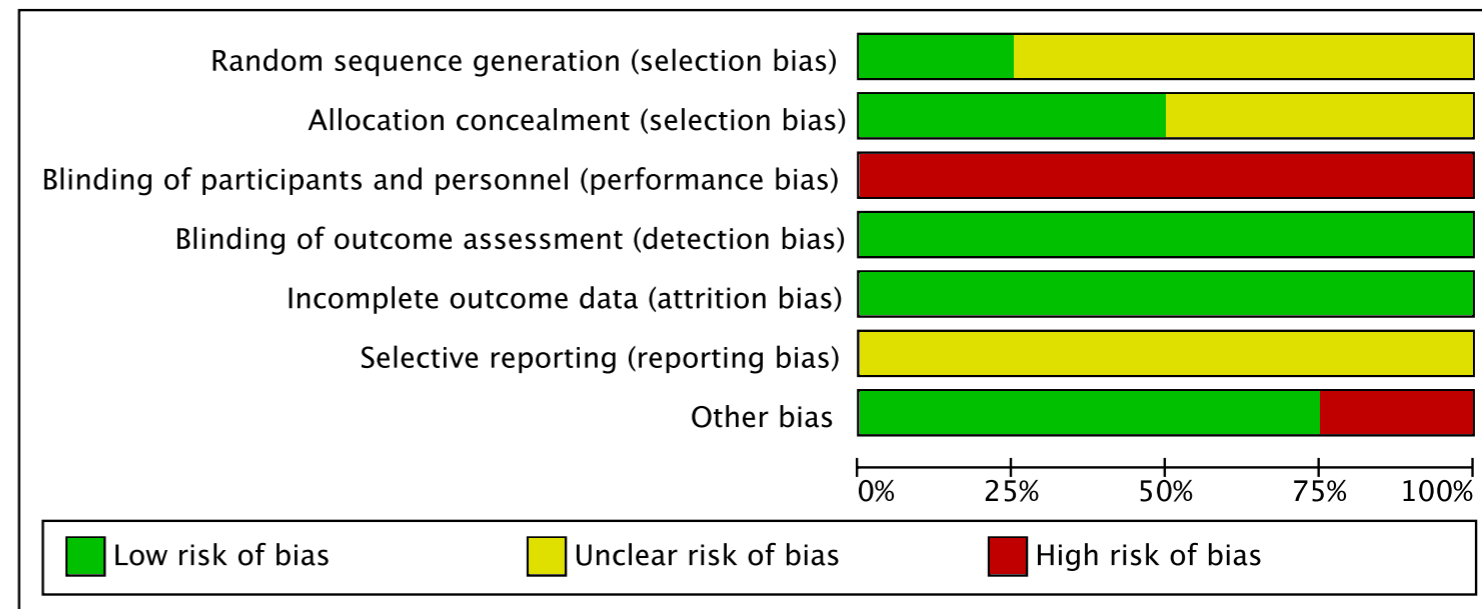

## Short term mortality (NPPV vs Oxygen therapy)

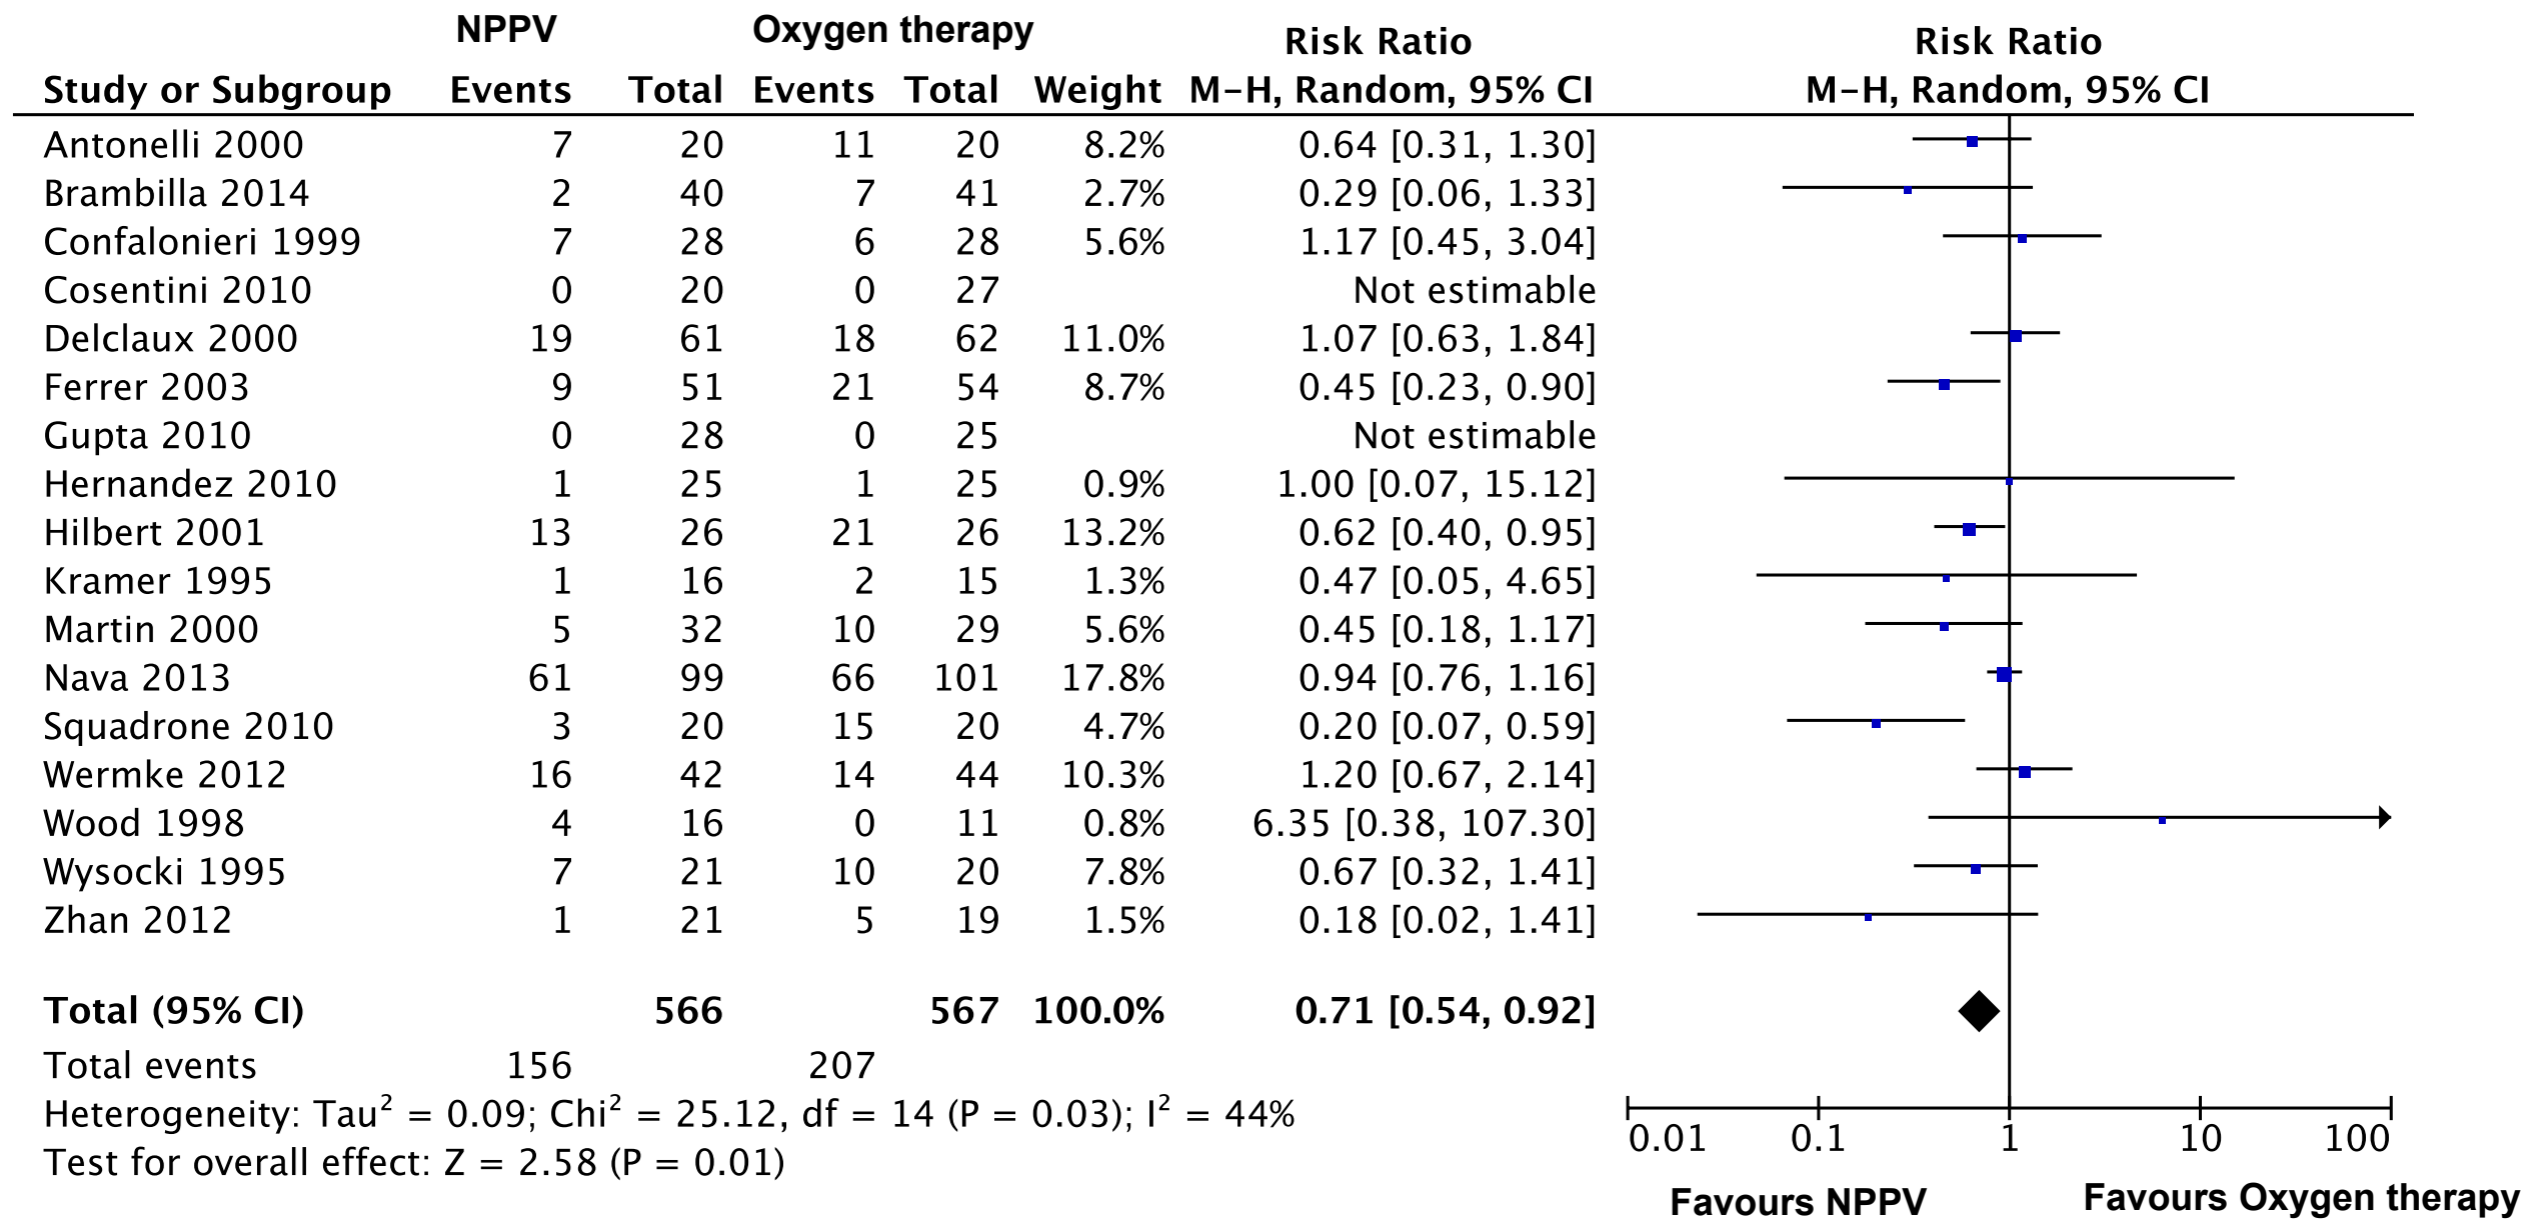

## Intubation (NPPV vs Oxygen therapy)

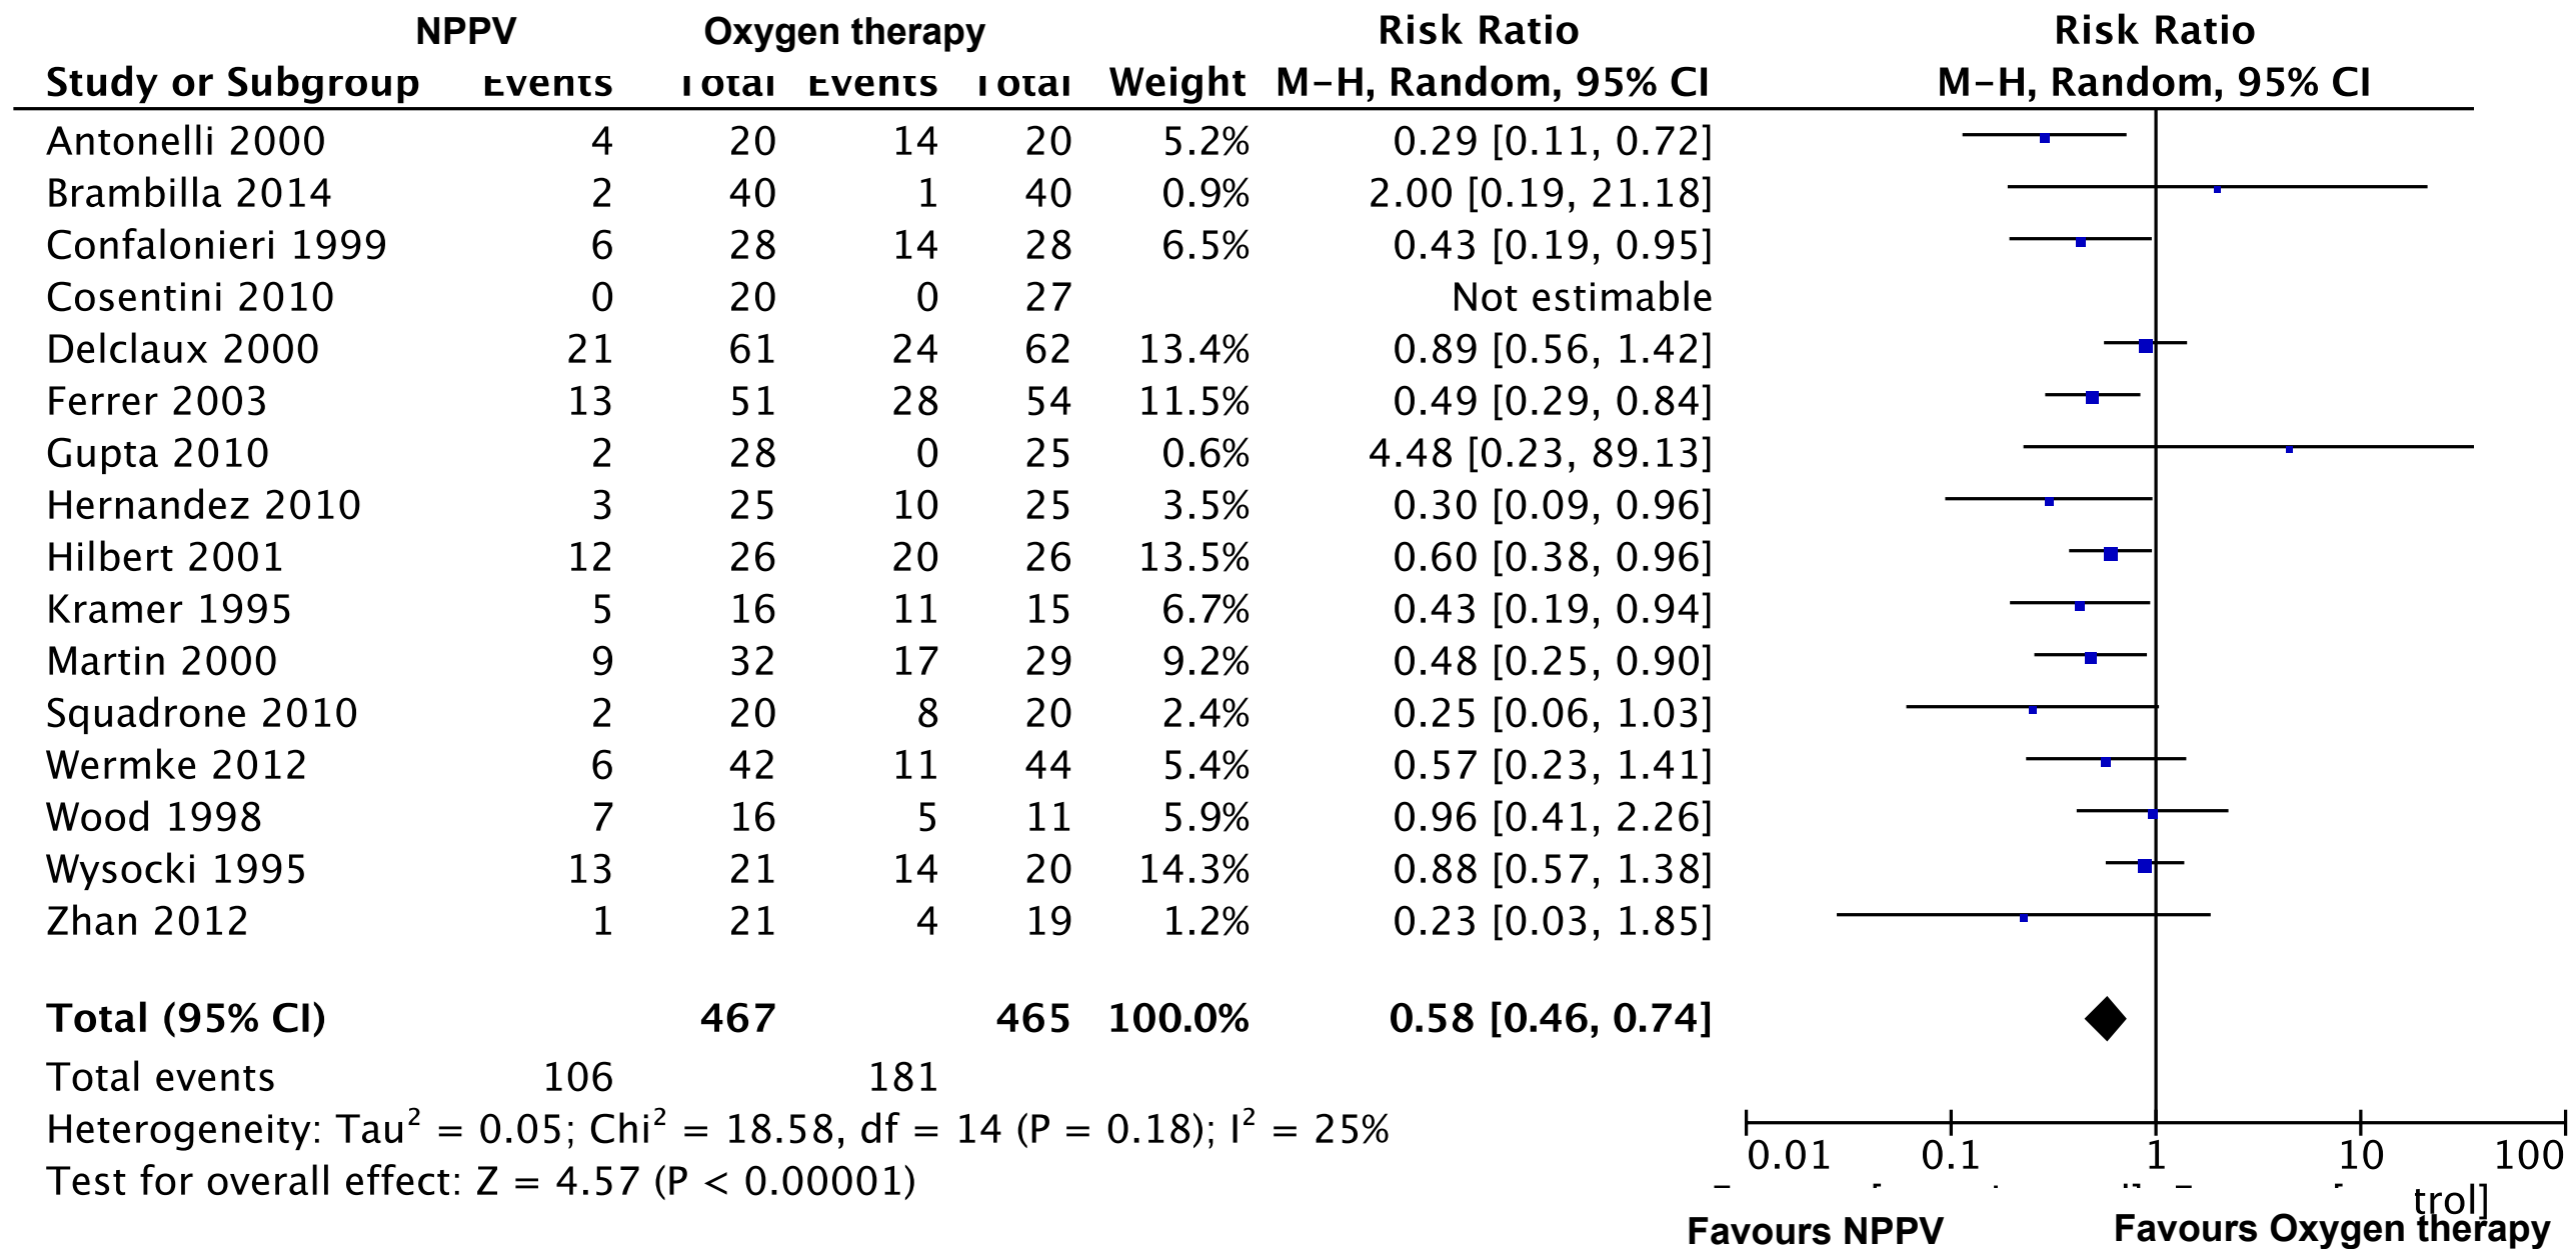

ias)

## Short term mortality (NPPV vs Intubation)

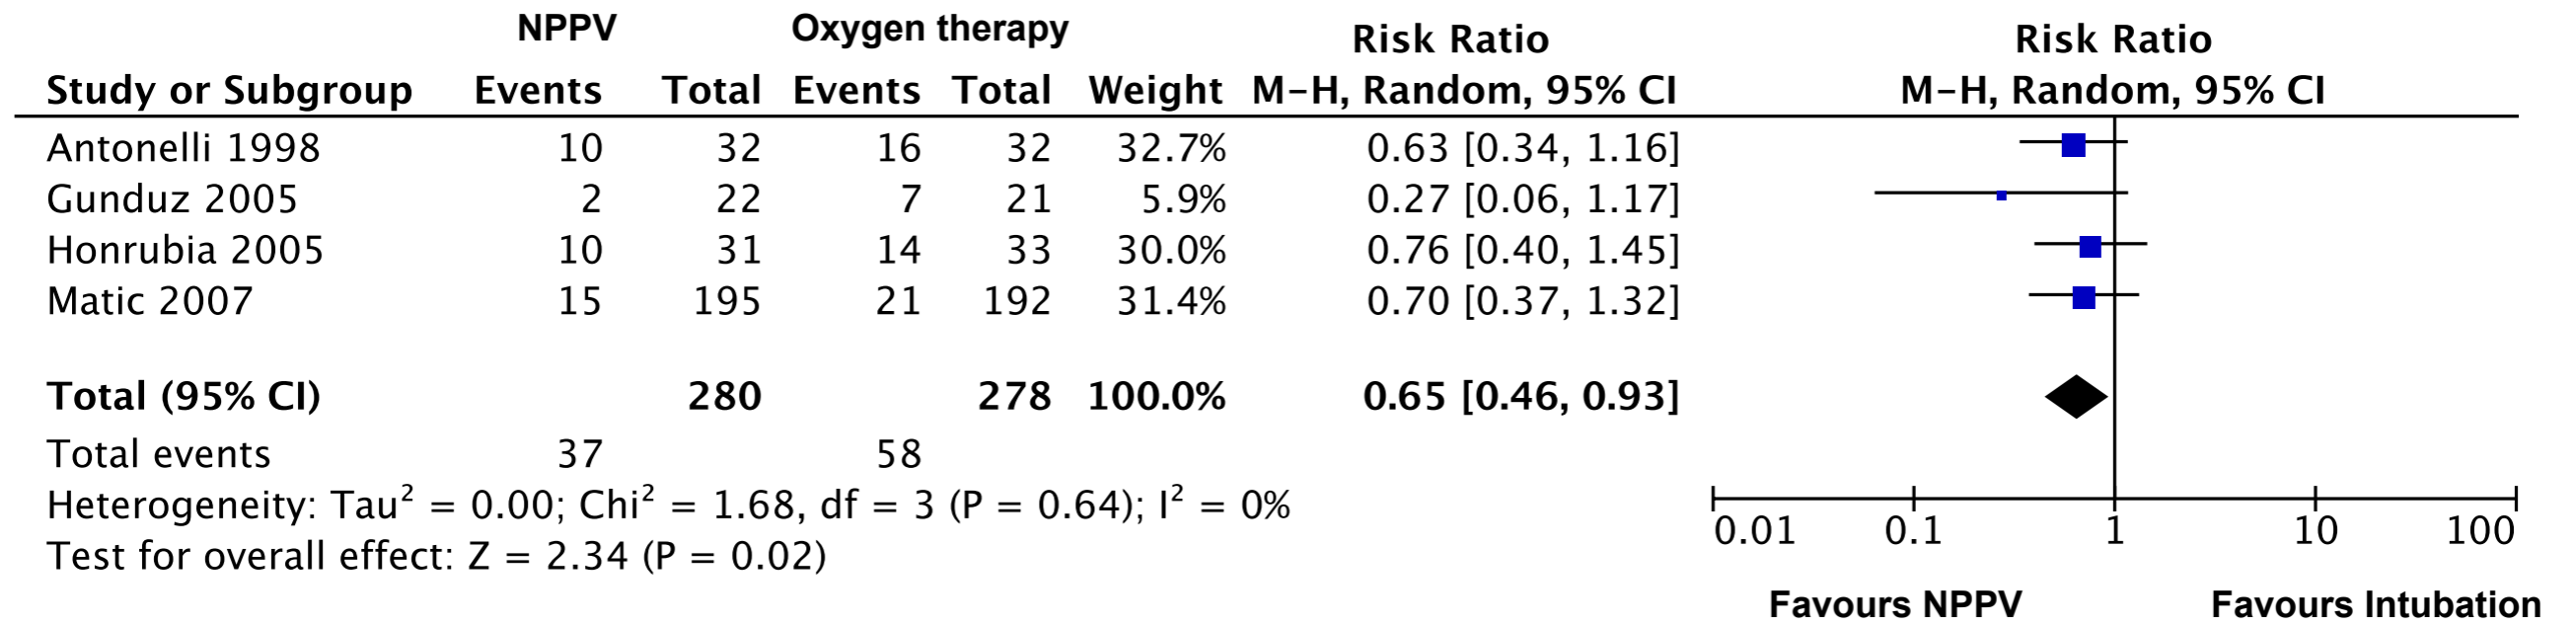

### Short term mortality (NPPV vs Oxygen therapy)

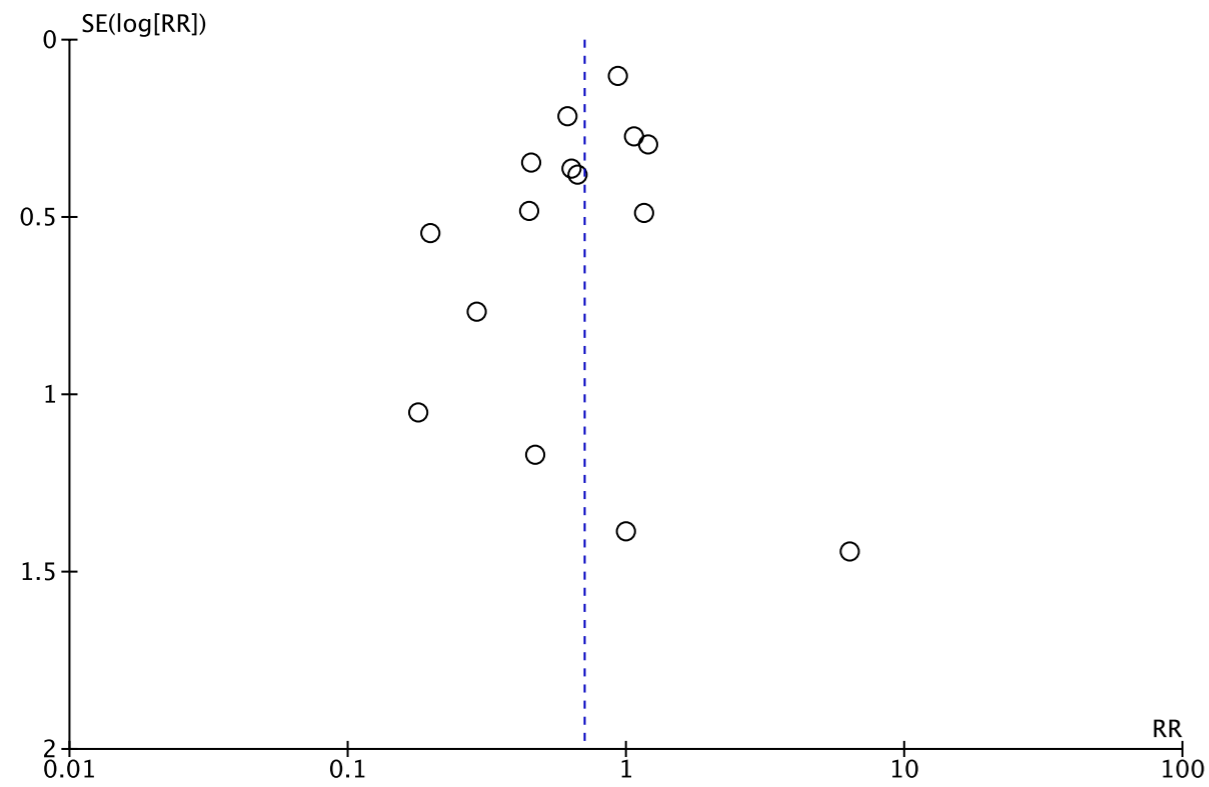

### Intubation (NPPV vs Oxygen therapy)

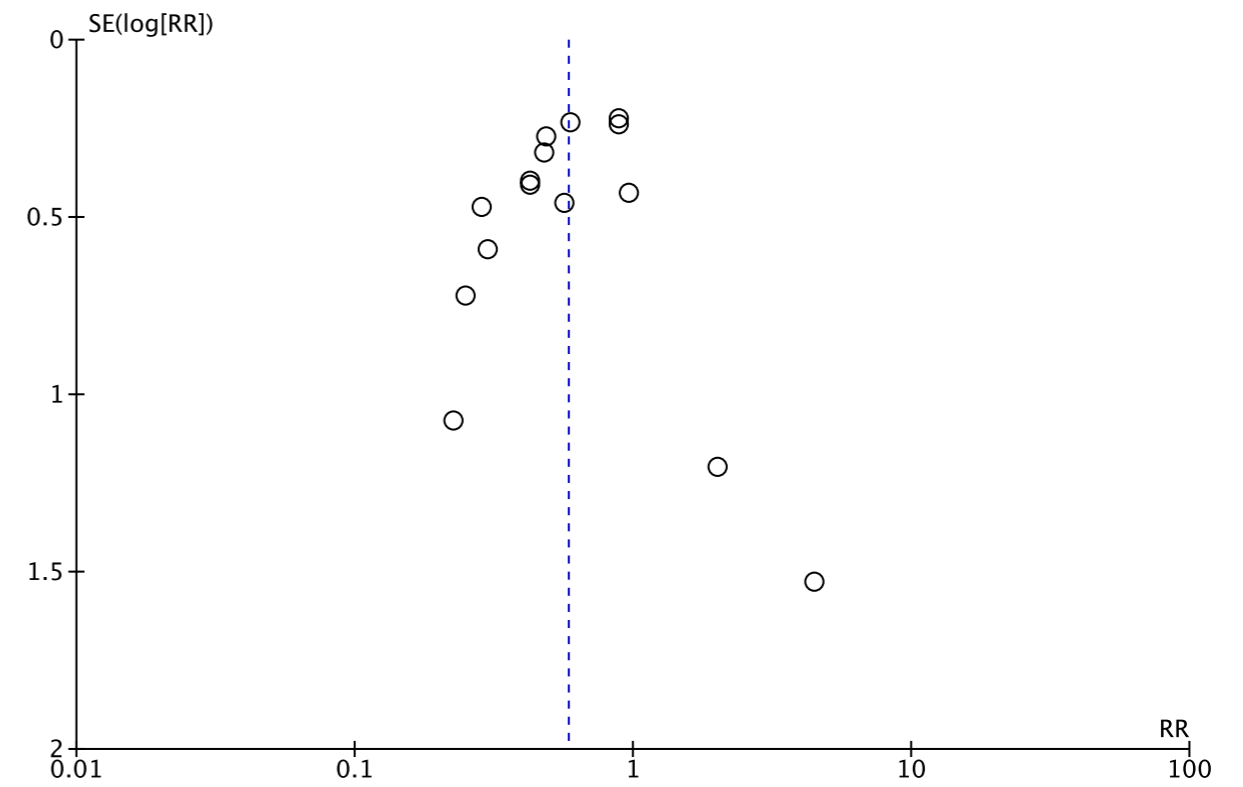

Summary of findings:

**CQ2: Should non-invasive positive pressure ventilation (NPPV) be used as early respiratory management in adult patients with ARDS? Oxygen therapy vs. NPPV**

**Patient or population:** Adult patients with hypoxemia

**Intervention:** NPPV

**Comparison:** oxygen therapy

| Outcomes                                    | Anticipated absolute effects* (95% CI) |                                      | Relative effect (95% CI)    | No of participants (studies)     | Quality of the evidence (GRADE) | Comments |
|---------------------------------------------|----------------------------------------|--------------------------------------|-----------------------------|----------------------------------|---------------------------------|----------|
|                                             | Risk with oxygen therapy               | Risk with NPPV                       |                             |                                  |                                 |          |
| Mortality (Short-term) (in hospital or ICU) | <b>Study population</b>                |                                      | <b>RR</b><br>(0.54 to 0.92) | <b>0.71</b><br>1133<br>(17 RCTs) | ⊕⊕○○<br>LOW <sup>1,2,3,4</sup>  |          |
|                                             | 365 per 1,000                          | <b>259 per 1,000</b><br>(197 to 336) |                             |                                  |                                 |          |
|                                             | <b>Low</b>                             |                                      |                             |                                  |                                 |          |
|                                             | 133 per 1,000                          | <b>94 per 1,000</b><br>(72 to 122)   |                             |                                  |                                 |          |
|                                             | <b>High</b>                            |                                      |                             |                                  |                                 |          |
|                                             | 750 per 1,000                          | <b>533 per 1,000</b><br>(405 to 690) |                             |                                  |                                 |          |
| Intubation                                  | <b>Study population</b>                |                                      | <b>RR</b><br>(0.46 to 0.74) | <b>0.58</b><br>932<br>(16 RCTs)  | ⊕⊕○○<br>LOW <sup>3,5,6,7</sup>  |          |
|                                             | 389 per 1,000                          | <b>226 per 1,000</b><br>(179 to 288) |                             |                                  |                                 |          |
|                                             | <b>Low</b>                             |                                      |                             |                                  |                                 |          |
|                                             | 211 per 1,000                          | <b>122 per 1,000</b><br>(97 to 156)  |                             |                                  |                                 |          |
|                                             | <b>High</b>                            |                                      |                             |                                  |                                 |          |
|                                             | 733 per 1,000                          | <b>425 per 1,000</b><br>(337 to 542) |                             |                                  |                                 |          |

## Summary of findings:

---

**CQ2: Should non-invasive positive pressure ventilation (NPPV) be used as early respiratory management in adult patients with ARDS? Oxygen therapy vs. NPPV**


---

**Patient or population:** Adult patients with hypoxemia

**Intervention:** NPPV

**Comparison:** oxygen therapy

| Outcomes | Anticipated absolute effects* (95% CI) |                | Relative effect (95% CI) | № of participants (studies) | Quality of the evidence (GRADE) | Comments |
|----------|----------------------------------------|----------------|--------------------------|-----------------------------|---------------------------------|----------|
|          | Risk with oxygen therapy               | Risk with NPPV |                          |                             |                                 |          |

\*The risk in the intervention group (and its 95% confidence interval) is based on the assumed risk in the comparison group and the **relative effect** of the intervention (and its 95% CI).

CI: Confidence interval; RR: Risk ratio

---

**GRADE Working Group grades of evidence**

**High quality:** We are very confident that the true effect lies close to that of the estimate of the effect

**Moderate quality:** We are moderately confident in the effect estimate: The true effect is likely to be close to the estimate of the effect, but there is a possibility that it is substantially different

**Low quality:** Our confidence in the effect estimate is limited: The true effect may be substantially different from the estimate of the effect

**Very low quality:** We have very little confidence in the effect estimate: The true effect is likely to be substantially different from the estimate of effect

---

1. Although it was impossible to blind patients or caregivers in RCTs evaluating NPPV, lack of blinding was not considered as a factor of downgrading because of a property of mortality as an outcome. In some RCTs, allocation concealment and selective outcome reporting were 'unclear', however we decided not to downgrade.
2. The point estimates were significantly inconsistent across the studies and heterogeneity was moderate ( $I^2 = 44\%$ ).
3. Subjects were patients with hypoxemia, not ARDS.
4. RR 0.71 [0.54-0.92]. Criteria of the optimal information size (OIS) were met.
5. Decision of intubation depended on clinicians at bedside and in 6 of 21 RCTs included, blinding outcome assessors was considered as 'high risk.'
6. Variance of point estimates across studies was not significant and heterogeneity was low ( $I^2 = 25\%$ ).
7. RR 0.58 [0.46-0.74]. Criteria of the OIS were met.

## Summary of findings:

**CQ2: Should non-invasive positive pressure ventilation (NPPV) be used as early respiratory management in adult patients with ARDS? Conventional mechanical ventilation vs. NPPV**
**Patient or population:** Adult patients with hypoxemia

**Intervention:** NPPV

**Comparison:** Conventional mechanical ventilation

| Outcomes                                    | Anticipated absolute effects* (95% CI) |                                      | Relative effect (95% CI) | No of participants (studies) | Quality of the evidence (GRADE) | Comments |
|---------------------------------------------|----------------------------------------|--------------------------------------|--------------------------|------------------------------|---------------------------------|----------|
|                                             | Risk with invasive MV                  | Risk with NIV                        |                          |                              |                                 |          |
| Mortality (Short-term) (in hospital or ICU) | <b>Study population</b>                |                                      | RR<br>(0.46 to 0.93)     | 0.65<br>558<br>(4 RCTs)      | ⊕⊕○○<br>LOW <sup>1,2,3,4</sup>  |          |
|                                             | 209 per 1,000                          | <b>136 per 1,000</b><br>(96 to 194)  |                          |                              |                                 |          |
|                                             | <b>Moderate</b>                        |                                      |                          |                              |                                 |          |
|                                             | 379 per 1,000                          | <b>246 per 1,000</b><br>(174 to 352) |                          |                              |                                 |          |

\*The risk in the intervention group (and its 95% confidence interval) is based on the assumed risk in the comparison group and the **relative effect** of the intervention (and its 95% CI).

CI: Confidence interval; RR: Risk ratio

**GRADE Working Group grades of evidence**

**High quality:** We are very confident that the true effect lies close to that of the estimate of the effect

**Moderate quality:** We are moderately confident in the effect estimate: The true effect is likely to be close to the estimate of the effect, but there is a possibility that it is substantially different

**Low quality:** Our confidence in the effect estimate is limited: The true effect may be substantially different from the estimate of the effect

**Very low quality:** We have very little confidence in the effect estimate: The true effect is likely to be substantially different from the estimate of effect

1. It was impossible to blind patients or caregivers in RCTs evaluating NPPV, and lack of blinding was not considered as a factor of downgrading because of a property of mortality as an outcome. In some RCTs, allocation concealment and selective outcome reporting were 'unclear', however we decided not to downgrade.
2. Variance of the point estimates across studies was not significant and heterogeneity was low ( $I^2 = 0\%$ ).
3. Subjects were patients with hypoxemia, not ARDS.
4. RR 0.65 [0.46-0.93]. Criteria of the optimal information size (OIS) were not met.



**CQ2:**

**Question:** Should non-invasive positive pressure ventilation (NPPV) be used as early respiratory management in adult patients with ARDS?

**Oxygen therapy vs. NPPV**

| Quality assessment                      |                   |                          |                          |                      |                          |                      | № of patients   |                 | Effect                    |                                                      | Quality     | Importance |
|-----------------------------------------|-------------------|--------------------------|--------------------------|----------------------|--------------------------|----------------------|-----------------|-----------------|---------------------------|------------------------------------------------------|-------------|------------|
| № of studies                            | Study design      | Risk of bias             | Inconsistency            | Indirectness         | Imprecision              | Other considerations | NPPV            | oxygen therapy  | Relative (95% CI)         | Absolute (95% CI)                                    |             |            |
| Short term Mortality <sup>Note 1)</sup> |                   |                          |                          |                      |                          |                      |                 |                 |                           |                                                      |             |            |
| 17                                      | Randomised trials | Not serious <sup>1</sup> | Serious <sup>2</sup>     | Serious <sup>3</sup> | Not serious <sup>4</sup> | None                 | 156/566 (27.6%) | 207/567 (36.5%) | RR 0.71<br>(0.54 to 0.92) | 106 fewer per 1,000<br>(from 29 fewer to 168 fewer)  | ⊕⊕○○<br>LOW | CRITICAL   |
|                                         |                   |                          |                          |                      |                          |                      |                 | 13.3%           |                           | 39 fewer per 1,000<br>(from 11 fewer to 61 fewer)    |             |            |
|                                         |                   |                          |                          |                      |                          |                      |                 | 75.0%           |                           | 218 fewer per 1,000<br>(from 60 fewer to 345 fewer)  |             |            |
| Intubation                              |                   |                          |                          |                      |                          |                      |                 |                 |                           |                                                      |             |            |
| 16                                      | Randomised trials | Serious <sup>5</sup>     | Not serious <sup>6</sup> | Serious <sup>3</sup> | Not serious <sup>7</sup> | None                 | 106/467 (22.7%) | 181/465 (38.9%) | RR 0.58<br>(0.46 to 0.74) | 163 fewer per 1,000<br>(from 101 fewer to 210 fewer) | ⊕⊕○○<br>LOW | IMPORTANT  |
|                                         |                   |                          |                          |                      |                          |                      |                 | 21.1%           |                           | 89 fewer per 1,000<br>(from 55 fewer to 114 fewer)   |             |            |
|                                         |                   |                          |                          |                      |                          |                      |                 | 73.3%           |                           | 308 fewer per 1,000<br>(from 191 fewer to 396 fewer) |             |            |

CI: Confidence interval; RR: Risk ratio

- Although it was impossible to blind patients or caregivers in RCTs evaluating NPPV, lack of blinding was not considered as a factor of downgrading because of a property of mortality as an outcome. In some RCTs, allocation concealment and selective outcome reporting were 'unclear', however we decided not to downgrade.
- The point estimates were significantly inconsistent across the studies. According to I<sup>2</sup>, heterogeneity was considered to be moderate (I<sup>2</sup> = 44%).
- Subjects were patients with hypoxemia, not ARDS.
- RR 0.71 [0.54-0.92]. Criteria of the optimal information size (OIS) were met.
- Decision of intubation depended on clinicians at bedside and in 6 of 21 RCTs included, blinding outcome assessors was considered as 'high risk.'
- Variance of point estimates across studies was not significant. According to I<sup>2</sup>, heterogeneity was considered to be low (I<sup>2</sup> = 25%).
- RR 0.58 [0.46-0.74]. Criteria of the OIS were met.

**CQ2:**

**Question:** Should non-invasive positive pressure ventilation (NPPV) be used as early respiratory management in adult patients with ARDS?

**Conventional mechanical ventilation vs. NPPV**

| Quality assessment                      |                   |                          |                          |                      |                      |                      | No of patients |                                     | Effect                 |                                                  | Quality     | Importance |
|-----------------------------------------|-------------------|--------------------------|--------------------------|----------------------|----------------------|----------------------|----------------|-------------------------------------|------------------------|--------------------------------------------------|-------------|------------|
| No of studies                           | Study design      | Risk of bias             | Inconsistency            | Indirectness         | Imprecision          | Other considerations | NPPV           | Conventional mechanical ventilation | Relative (95% CI)      | Absolute (95% CI)                                |             |            |
| Short term Mortality <sup>Note 1)</sup> |                   |                          |                          |                      |                      |                      |                |                                     |                        |                                                  |             |            |
| 4                                       | randomised trials | not serious <sup>1</sup> | not serious <sup>2</sup> | serious <sup>3</sup> | serious <sup>4</sup> | none                 | 37/280 (13.2%) | 58/278 (20.9%)                      | RR 0.65 (0.46 to 0.93) | 73 fewer per 1,000 (from 15 fewer to 113 fewer)  | ⊕⊕○○<br>LOW | CRITICAL   |
|                                         |                   |                          |                          |                      |                      |                      |                | 37.9%                               |                        | 133 fewer per 1,000 (from 27 fewer to 205 fewer) |             |            |

CI: Confidence interval; RR: Risk ratio

1. It was impossible to blind patients or caregivers in RCTs evaluating NPPV, and lack of blinding was not considered as a factor of downgrading because of a property of mortality as an outcome. In some RCTs, allocation concealment and selective outcome reporting were 'unclear', however we decided not to downgrade.
2. Variance of the point estimates across studies was not significant. According to I2, heterogeneity was considered to be low (I2 = 0%).
3. Subjects were patients with hypoxemia, not ARDS.
4. RR 0.65 [0.46-0.93]. Criteria of the optimal information size (OIS) were not met.

**Evidence-to-Decision table**

**CQ2: Should non-invasive positive pressure ventilation (NPPV) be used as early respiratory management in adult patients with ARDS?**

PATIENTS: ADULT PATIENTS WITH HYPOXEMIA

INTERVENTION: NON-INVASIVE POSITIVE PRESSURE VENTIOATION (NPPV)

| CRITERIA                                                                                                 |                                                                                                                                                                                                                       | JUDGEMENTS                                                                                                                                                                                                                                                                                                                                              | RESEARCH EVIDENCE                                                                                                                                                                                                                                                                                                                                                                                                                                                                                                                                                                                                                                                                                                                                                                                                                                                                                                                                                                                                                                                                                                                                                                                              | ADDITIONAL CONSIDERATIONS                        |                               |                                   |                              |                               |                              |            |                         |                                                  |                        |            |                       |                                                |            |                         |                                                  |            |            |                         |                                                   |                        |            |                        |                                                 |            |                         |                                                   |  |
|----------------------------------------------------------------------------------------------------------|-----------------------------------------------------------------------------------------------------------------------------------------------------------------------------------------------------------------------|---------------------------------------------------------------------------------------------------------------------------------------------------------------------------------------------------------------------------------------------------------------------------------------------------------------------------------------------------------|----------------------------------------------------------------------------------------------------------------------------------------------------------------------------------------------------------------------------------------------------------------------------------------------------------------------------------------------------------------------------------------------------------------------------------------------------------------------------------------------------------------------------------------------------------------------------------------------------------------------------------------------------------------------------------------------------------------------------------------------------------------------------------------------------------------------------------------------------------------------------------------------------------------------------------------------------------------------------------------------------------------------------------------------------------------------------------------------------------------------------------------------------------------------------------------------------------------|--------------------------------------------------|-------------------------------|-----------------------------------|------------------------------|-------------------------------|------------------------------|------------|-------------------------|--------------------------------------------------|------------------------|------------|-----------------------|------------------------------------------------|------------|-------------------------|--------------------------------------------------|------------|------------|-------------------------|---------------------------------------------------|------------------------|------------|------------------------|-------------------------------------------------|------------|-------------------------|---------------------------------------------------|--|
| <b>PROBLEM</b>                                                                                           | Is the problem a priority?                                                                                                                                                                                            | <input type="radio"/> No<br><input type="radio"/> Probably no<br><input type="radio"/> Probably yes<br><input checked="" type="radio"/> Yes<br>-----<br><input type="radio"/> Varies<br><input type="radio"/> Don't know                                                                                                                                | Although non-invasive positive pressure ventilation (NPPV) is used for treating hypoxia worldwide, its efficacy for ARDS patients has not been understood thoroughly. It is shown that there is a possibility that the use of NPPV leads to decreasing the number of intubation and mortality among ARDS patients, hence, its priority in clinical use is high.                                                                                                                                                                                                                                                                                                                                                                                                                                                                                                                                                                                                                                                                                                                                                                                                                                                |                                                  |                               |                                   |                              |                               |                              |            |                         |                                                  |                        |            |                       |                                                |            |                         |                                                  |            |            |                         |                                                   |                        |            |                        |                                                 |            |                         |                                                   |  |
|                                                                                                          | What is the overall certainty of the evidence of effects?                                                                                                                                                             | <input type="radio"/> Very low<br><input checked="" type="radio"/> Low<br><input type="radio"/> Moderate<br><input type="radio"/> High<br>-----<br><input type="radio"/> No included studies                                                                                                                                                            | <p><b>The relative importance or values of the main outcomes of interest:</b></p> <table border="1"> <thead> <tr> <th>Outcome</th> <th>Relative importance</th> <th>Certainty of the evidence (GRADE)</th> </tr> </thead> <tbody> <tr> <td>Short term Mortality Note 1)</td> <td>CRITICAL</td> <td>⊕⊕○○<br/>LOW</td> </tr> <tr> <td>Intubation</td> <td>IMPORTANT</td> <td>⊕⊕○○<br/>LOW</td> </tr> </tbody> </table>                                                                                                                                                                                                                                                                                                                                                                                                                                                                                                                                                                                                                                                                                                                                                                                           | Outcome                                          | Relative importance           | Certainty of the evidence (GRADE) | Short term Mortality Note 1) | CRITICAL                      | ⊕⊕○○<br>LOW                  | Intubation | IMPORTANT               | ⊕⊕○○<br>LOW                                      |                        |            |                       |                                                |            |                         |                                                  |            |            |                         |                                                   |                        |            |                        |                                                 |            |                         |                                                   |  |
| Outcome                                                                                                  | Relative importance                                                                                                                                                                                                   | Certainty of the evidence (GRADE)                                                                                                                                                                                                                                                                                                                       |                                                                                                                                                                                                                                                                                                                                                                                                                                                                                                                                                                                                                                                                                                                                                                                                                                                                                                                                                                                                                                                                                                                                                                                                                |                                                  |                               |                                   |                              |                               |                              |            |                         |                                                  |                        |            |                       |                                                |            |                         |                                                  |            |            |                         |                                                   |                        |            |                        |                                                 |            |                         |                                                   |  |
| Short term Mortality Note 1)                                                                             | CRITICAL                                                                                                                                                                                                              | ⊕⊕○○<br>LOW                                                                                                                                                                                                                                                                                                                                             |                                                                                                                                                                                                                                                                                                                                                                                                                                                                                                                                                                                                                                                                                                                                                                                                                                                                                                                                                                                                                                                                                                                                                                                                                |                                                  |                               |                                   |                              |                               |                              |            |                         |                                                  |                        |            |                       |                                                |            |                         |                                                  |            |            |                         |                                                   |                        |            |                        |                                                 |            |                         |                                                   |  |
| Intubation                                                                                               | IMPORTANT                                                                                                                                                                                                             | ⊕⊕○○<br>LOW                                                                                                                                                                                                                                                                                                                                             |                                                                                                                                                                                                                                                                                                                                                                                                                                                                                                                                                                                                                                                                                                                                                                                                                                                                                                                                                                                                                                                                                                                                                                                                                |                                                  |                               |                                   |                              |                               |                              |            |                         |                                                  |                        |            |                       |                                                |            |                         |                                                  |            |            |                         |                                                   |                        |            |                        |                                                 |            |                         |                                                   |  |
| <b>BENEFITS &amp; HARMS OF THE OPTIONS</b>                                                               | Is there important uncertainty about or variability in how much people value the main outcomes?                                                                                                                       | <input type="radio"/> Important uncertainty or variability<br><input type="radio"/> Possibly important uncertainty or variability<br><input type="radio"/> Possibly no important uncertainty or variability<br><input checked="" type="radio"/> No important uncertainty or variability<br>-----<br><input type="radio"/> No known undesirable outcomes | <p><b>Oxygen therapy vs. NPPV</b></p> <p><b>Summary of findings:</b></p> <table border="1"> <thead> <tr> <th>Outcome</th> <th>Oxygen therapy</th> <th>NPPV</th> <th>Difference (95% CI)</th> <th>Relative effect (RR) (95% CI)</th> </tr> </thead> <tbody> <tr> <td rowspan="3">Short term Mortality Note 1)</td> <td>365 / 1000</td> <td>259 / 1000 (197 to 336)</td> <td>106 fewer per 1,000 (from 29 fewer to 168 fewer)</td> <td rowspan="3">RR 0.71 (0.54 to 0.92)</td> </tr> <tr> <td>133 / 1000</td> <td>94 / 1000 (72 to 122)</td> <td>39 fewer per 1,000 (from 11 fewer to 61 fewer)</td> </tr> <tr> <td>750 / 1000</td> <td>533 / 1000 (405 to 690)</td> <td>218 fewer per 1,000 (from 60 fewer to 345 fewer)</td> </tr> <tr> <td rowspan="3">Intubation</td> <td>389 / 1000</td> <td>226 / 1000 (179 to 288)</td> <td>163 fewer per 1,000 (from 101 fewer to 210 fewer)</td> <td rowspan="3">RR 0.58 (0.46 to 0.74)</td> </tr> <tr> <td>211 / 1000</td> <td>122 / 1000 (97 to 156)</td> <td>89 fewer per 1,000 (from 55 fewer to 114 fewer)</td> </tr> <tr> <td>733 / 1000</td> <td>425 / 1000 (337 to 542)</td> <td>308 fewer per 1,000 (from 191 fewer to 396 fewer)</td> </tr> </tbody> </table> | Outcome                                          | Oxygen therapy                | NPPV                              | Difference (95% CI)          | Relative effect (RR) (95% CI) | Short term Mortality Note 1) | 365 / 1000 | 259 / 1000 (197 to 336) | 106 fewer per 1,000 (from 29 fewer to 168 fewer) | RR 0.71 (0.54 to 0.92) | 133 / 1000 | 94 / 1000 (72 to 122) | 39 fewer per 1,000 (from 11 fewer to 61 fewer) | 750 / 1000 | 533 / 1000 (405 to 690) | 218 fewer per 1,000 (from 60 fewer to 345 fewer) | Intubation | 389 / 1000 | 226 / 1000 (179 to 288) | 163 fewer per 1,000 (from 101 fewer to 210 fewer) | RR 0.58 (0.46 to 0.74) | 211 / 1000 | 122 / 1000 (97 to 156) | 89 fewer per 1,000 (from 55 fewer to 114 fewer) | 733 / 1000 | 425 / 1000 (337 to 542) | 308 fewer per 1,000 (from 191 fewer to 396 fewer) |  |
|                                                                                                          | Outcome                                                                                                                                                                                                               | Oxygen therapy                                                                                                                                                                                                                                                                                                                                          | NPPV                                                                                                                                                                                                                                                                                                                                                                                                                                                                                                                                                                                                                                                                                                                                                                                                                                                                                                                                                                                                                                                                                                                                                                                                           | Difference (95% CI)                              | Relative effect (RR) (95% CI) |                                   |                              |                               |                              |            |                         |                                                  |                        |            |                       |                                                |            |                         |                                                  |            |            |                         |                                                   |                        |            |                        |                                                 |            |                         |                                                   |  |
|                                                                                                          | Short term Mortality Note 1)                                                                                                                                                                                          | 365 / 1000                                                                                                                                                                                                                                                                                                                                              | 259 / 1000 (197 to 336)                                                                                                                                                                                                                                                                                                                                                                                                                                                                                                                                                                                                                                                                                                                                                                                                                                                                                                                                                                                                                                                                                                                                                                                        | 106 fewer per 1,000 (from 29 fewer to 168 fewer) | RR 0.71 (0.54 to 0.92)        |                                   |                              |                               |                              |            |                         |                                                  |                        |            |                       |                                                |            |                         |                                                  |            |            |                         |                                                   |                        |            |                        |                                                 |            |                         |                                                   |  |
|                                                                                                          |                                                                                                                                                                                                                       | 133 / 1000                                                                                                                                                                                                                                                                                                                                              | 94 / 1000 (72 to 122)                                                                                                                                                                                                                                                                                                                                                                                                                                                                                                                                                                                                                                                                                                                                                                                                                                                                                                                                                                                                                                                                                                                                                                                          | 39 fewer per 1,000 (from 11 fewer to 61 fewer)   |                               |                                   |                              |                               |                              |            |                         |                                                  |                        |            |                       |                                                |            |                         |                                                  |            |            |                         |                                                   |                        |            |                        |                                                 |            |                         |                                                   |  |
|                                                                                                          |                                                                                                                                                                                                                       | 750 / 1000                                                                                                                                                                                                                                                                                                                                              | 533 / 1000 (405 to 690)                                                                                                                                                                                                                                                                                                                                                                                                                                                                                                                                                                                                                                                                                                                                                                                                                                                                                                                                                                                                                                                                                                                                                                                        | 218 fewer per 1,000 (from 60 fewer to 345 fewer) |                               |                                   |                              |                               |                              |            |                         |                                                  |                        |            |                       |                                                |            |                         |                                                  |            |            |                         |                                                   |                        |            |                        |                                                 |            |                         |                                                   |  |
| Intubation                                                                                               | 389 / 1000                                                                                                                                                                                                            | 226 / 1000 (179 to 288)                                                                                                                                                                                                                                                                                                                                 | 163 fewer per 1,000 (from 101 fewer to 210 fewer)                                                                                                                                                                                                                                                                                                                                                                                                                                                                                                                                                                                                                                                                                                                                                                                                                                                                                                                                                                                                                                                                                                                                                              | RR 0.58 (0.46 to 0.74)                           |                               |                                   |                              |                               |                              |            |                         |                                                  |                        |            |                       |                                                |            |                         |                                                  |            |            |                         |                                                   |                        |            |                        |                                                 |            |                         |                                                   |  |
|                                                                                                          | 211 / 1000                                                                                                                                                                                                            | 122 / 1000 (97 to 156)                                                                                                                                                                                                                                                                                                                                  | 89 fewer per 1,000 (from 55 fewer to 114 fewer)                                                                                                                                                                                                                                                                                                                                                                                                                                                                                                                                                                                                                                                                                                                                                                                                                                                                                                                                                                                                                                                                                                                                                                |                                                  |                               |                                   |                              |                               |                              |            |                         |                                                  |                        |            |                       |                                                |            |                         |                                                  |            |            |                         |                                                   |                        |            |                        |                                                 |            |                         |                                                   |  |
|                                                                                                          | 733 / 1000                                                                                                                                                                                                            | 425 / 1000 (337 to 542)                                                                                                                                                                                                                                                                                                                                 | 308 fewer per 1,000 (from 191 fewer to 396 fewer)                                                                                                                                                                                                                                                                                                                                                                                                                                                                                                                                                                                                                                                                                                                                                                                                                                                                                                                                                                                                                                                                                                                                                              |                                                  |                               |                                   |                              |                               |                              |            |                         |                                                  |                        |            |                       |                                                |            |                         |                                                  |            |            |                         |                                                   |                        |            |                        |                                                 |            |                         |                                                   |  |
| How substantial are the desirable anticipated effects?                                                   | <input type="radio"/> Trivial<br><input type="radio"/> Small<br><input checked="" type="radio"/> Moderate<br><input type="radio"/> Large<br>-----<br><input type="radio"/> Varies<br><input type="radio"/> Don't know |                                                                                                                                                                                                                                                                                                                                                         |                                                                                                                                                                                                                                                                                                                                                                                                                                                                                                                                                                                                                                                                                                                                                                                                                                                                                                                                                                                                                                                                                                                                                                                                                |                                                  |                               |                                   |                              |                               |                              |            |                         |                                                  |                        |            |                       |                                                |            |                         |                                                  |            |            |                         |                                                   |                        |            |                        |                                                 |            |                         |                                                   |  |
| How substantial are the undesirable anticipated effects?                                                 | <input type="radio"/> Large<br><input type="radio"/> Moderate<br><input checked="" type="radio"/> Small<br><input type="radio"/> Trivial<br>-----<br><input type="radio"/> Varies<br><input type="radio"/> Don't know |                                                                                                                                                                                                                                                                                                                                                         |                                                                                                                                                                                                                                                                                                                                                                                                                                                                                                                                                                                                                                                                                                                                                                                                                                                                                                                                                                                                                                                                                                                                                                                                                |                                                  |                               |                                   |                              |                               |                              |            |                         |                                                  |                        |            |                       |                                                |            |                         |                                                  |            |            |                         |                                                   |                        |            |                        |                                                 |            |                         |                                                   |  |
| Does the balance between desirable effects and undesirable effects favour the option or the comparison ? | <input type="radio"/> Favors the comparison<br><input type="radio"/> Probably favors the comparison<br><input type="radio"/> Does not favor either the intervention or the comparison                                 |                                                                                                                                                                                                                                                                                                                                                         | <p>Summary: In 17 RCTs comparing NPPV to oxygen therapy in patients with hypoxemia, NPPV significantly reduced the mortality (RR 0.71, 95%CI 0.54-0.92). In 16 RCTs comparing NPPV to oxygen therapy in patients with hypoxemia, NPPV significantly reduced the intubation (RR 0.58, 95%CI 0.46-0.74).</p>                                                                                                                                                                                                                                                                                                                                                                                                                                                                                                                                                                                                                                                                                                                                                                                                                                                                                                     |                                                  |                               |                                   |                              |                               |                              |            |                         |                                                  |                        |            |                       |                                                |            |                         |                                                  |            |            |                         |                                                   |                        |            |                        |                                                 |            |                         |                                                   |  |

|                                    |                                                                                | <input checked="" type="radio"/> Probably favors the intervention<br><input type="radio"/> Favors the intervention<br>-----<br><input type="radio"/> Varies<br><input type="radio"/> Don't know                                                                                                                                                                                                   | <p><b>Conventional mechanical ventilation vs. NPPV</b></p> <p><b>Summary of findings:</b></p> <table border="1" data-bbox="497 210 1249 595"> <thead> <tr> <th>Outcome</th> <th>Oxygen therapy</th> <th>NPPV</th> <th>Difference (95% CI)</th> <th>Relative effect (RR) (95% CI)</th> </tr> </thead> <tbody> <tr> <td rowspan="2">Mortality (Short term)*1</td> <td>209 / 1,000</td> <td><b>136 / 1,000</b><br/>(96 to 194)</td> <td><b>73 fewer per 1,000</b><br/>(from 15 fewer to 113 fewer)</td> <td rowspan="2"><b>RR 0.65</b><br/>(0.46 to 0.93)</td> </tr> <tr> <td>379 / 1,000</td> <td><b>246 / 1,000</b><br/>(174 to 352)</td> <td><b>133 fewer per 1,000</b><br/>(from 27 fewer to 205 fewer)</td> </tr> </tbody> </table> <p>Summary: In 4 RCTs comparing NPPV to conventional mechanical ventilation, NPPV significantly reduced the mortality (RR 0.65, 95%CI 0.46-0.93).</p> | Outcome                          | Oxygen therapy | NPPV | Difference (95% CI) | Relative effect (RR) (95% CI) | Mortality (Short term)*1 | 209 / 1,000 | <b>136 / 1,000</b><br>(96 to 194) | <b>73 fewer per 1,000</b><br>(from 15 fewer to 113 fewer) | <b>RR 0.65</b><br>(0.46 to 0.93) | 379 / 1,000 | <b>246 / 1,000</b><br>(174 to 352) | <b>133 fewer per 1,000</b><br>(from 27 fewer to 205 fewer) |  |
|------------------------------------|--------------------------------------------------------------------------------|---------------------------------------------------------------------------------------------------------------------------------------------------------------------------------------------------------------------------------------------------------------------------------------------------------------------------------------------------------------------------------------------------|---------------------------------------------------------------------------------------------------------------------------------------------------------------------------------------------------------------------------------------------------------------------------------------------------------------------------------------------------------------------------------------------------------------------------------------------------------------------------------------------------------------------------------------------------------------------------------------------------------------------------------------------------------------------------------------------------------------------------------------------------------------------------------------------------------------------------------------------------------------------------------------------|----------------------------------|----------------|------|---------------------|-------------------------------|--------------------------|-------------|-----------------------------------|-----------------------------------------------------------|----------------------------------|-------------|------------------------------------|------------------------------------------------------------|--|
| Outcome                            | Oxygen therapy                                                                 | NPPV                                                                                                                                                                                                                                                                                                                                                                                              | Difference (95% CI)                                                                                                                                                                                                                                                                                                                                                                                                                                                                                                                                                                                                                                                                                                                                                                                                                                                                         | Relative effect (RR) (95% CI)    |                |      |                     |                               |                          |             |                                   |                                                           |                                  |             |                                    |                                                            |  |
| Mortality (Short term)*1           | 209 / 1,000                                                                    | <b>136 / 1,000</b><br>(96 to 194)                                                                                                                                                                                                                                                                                                                                                                 | <b>73 fewer per 1,000</b><br>(from 15 fewer to 113 fewer)                                                                                                                                                                                                                                                                                                                                                                                                                                                                                                                                                                                                                                                                                                                                                                                                                                   | <b>RR 0.65</b><br>(0.46 to 0.93) |                |      |                     |                               |                          |             |                                   |                                                           |                                  |             |                                    |                                                            |  |
|                                    | 379 / 1,000                                                                    | <b>246 / 1,000</b><br>(174 to 352)                                                                                                                                                                                                                                                                                                                                                                | <b>133 fewer per 1,000</b><br>(from 27 fewer to 205 fewer)                                                                                                                                                                                                                                                                                                                                                                                                                                                                                                                                                                                                                                                                                                                                                                                                                                  |                                  |                |      |                     |                               |                          |             |                                   |                                                           |                                  |             |                                    |                                                            |  |
| <b>資源利用</b><br><b>RESOURCE USE</b> | How large are the resource requirements (costs)?                               | <input type="radio"/> Large costs<br><input checked="" type="radio"/> Moderate costs<br><input type="radio"/> Negligible costs and savings<br><input type="radio"/> Moderate savings<br><input type="radio"/> Large savings<br>-----<br><input type="radio"/> Varies<br><input type="radio"/> Don't know                                                                                          | For NPPV application, costs for mechanical ventilator with NPPV mode or one specialized to NPPV, interface of NPPV, amount of oxygen required and training for medical staffs are incurred.                                                                                                                                                                                                                                                                                                                                                                                                                                                                                                                                                                                                                                                                                                 |                                  |                |      |                     |                               |                          |             |                                   |                                                           |                                  |             |                                    |                                                            |  |
|                                    | Does the cost effectiveness of the option favour the option or the comparison? | <input type="radio"/> Favors the comparison<br><input type="radio"/> Probably favors the comparison<br><input checked="" type="radio"/> Does not favor either the intervention or the comparison<br><input type="radio"/> Probably favors the intervention<br><input type="radio"/> Favors the intervention<br>-----<br><input type="radio"/> Varies<br><input type="radio"/> No included studies | It cannot be determined that the net benefit of NPPV outweighs the cost or resources in patients with ARDS. Disposable masks for NPPV are quite costly.                                                                                                                                                                                                                                                                                                                                                                                                                                                                                                                                                                                                                                                                                                                                     |                                  |                |      |                     |                               |                          |             |                                   |                                                           |                                  |             |                                    |                                                            |  |
| <b>EQUITY</b>                      | What would be the impact on health equity?                                     | <input type="radio"/> Reduced<br><input type="radio"/> Probably reduced<br><input type="radio"/> Probably no impact<br><input type="radio"/> Probably increased<br><input type="radio"/> Increased<br>-----<br><input type="radio"/> Varies<br><input checked="" type="radio"/> Don't know                                                                                                        | There is no data for evaluating the equity although NPPV is more available in hospitals with more experience of NPPV.                                                                                                                                                                                                                                                                                                                                                                                                                                                                                                                                                                                                                                                                                                                                                                       |                                  |                |      |                     |                               |                          |             |                                   |                                                           |                                  |             |                                    |                                                            |  |

|                      |                                                      |                                                                                                                                                                                                                                                                           |                                                                                                  |  |
|----------------------|------------------------------------------------------|---------------------------------------------------------------------------------------------------------------------------------------------------------------------------------------------------------------------------------------------------------------------------|--------------------------------------------------------------------------------------------------|--|
| <b>ACCEPTABILITY</b> | <p>Is the option acceptable to key stakeholders?</p> | <p> <input type="radio"/> No<br/> <input type="radio"/> Probably no<br/> <input checked="" type="radio"/> Probably yes<br/> <input type="radio"/> Yes<br/>                 -----<br/> <input type="radio"/> Varies<br/> <input type="radio"/> Don't know             </p> | <p>NPPV has been used broadly in Japan and therefore can be expected to be readily accepted.</p> |  |
| <b>FEASIBILITY</b>   | <p>Is the option feasible to implement?</p>          | <p> <input type="radio"/> No<br/> <input type="radio"/> Probably no<br/> <input type="radio"/> Probably yes<br/> <input checked="" type="radio"/> Yes<br/>                 -----<br/> <input type="radio"/> Varies<br/> <input type="radio"/> Don't know             </p> | <p>NPPV has become a treatment that can be used in many hospitals in Japan already.</p>          |  |

Note 1) Among the deaths in hospital or in ICU

## Recommendation

### CQ2: Should non-invasive positive pressure ventilation (NPPV) be used as early respiratory management in adult patients with ARDS?

| Balance of consequences | Undesirable consequences <i>clearly outweigh</i> desirable consequences in most settings | Undesirable consequences <i>probably outweigh</i> desirable consequences in most settings | The balance between desirable and undesirable consequences is closely <i>balanced or uncertain</i> | Desirable consequences <i>probably outweigh</i> undesirable consequences in most settings | Desirable consequences <i>clearly outweigh</i> undesirable consequences in most settings |
|-------------------------|------------------------------------------------------------------------------------------|-------------------------------------------------------------------------------------------|----------------------------------------------------------------------------------------------------|-------------------------------------------------------------------------------------------|------------------------------------------------------------------------------------------|
| Judgement               | ○                                                                                        | ○                                                                                         | ○                                                                                                  | ●                                                                                         | ○                                                                                        |

| Type of recommendation | Strong recommendation against the intervention | Conditional recommendation against the intervention | Conditional recommendation for either the intervention or the comparison | Conditional recommendation for the intervention |
|------------------------|------------------------------------------------|-----------------------------------------------------|--------------------------------------------------------------------------|-------------------------------------------------|
| Judgement              | ○                                              | ○                                                   | ●                                                                        | ○                                               |

|                       |                                                                                                                                                                                                                                                                                                                                                                                                                                                                                                                                                                                         |
|-----------------------|-----------------------------------------------------------------------------------------------------------------------------------------------------------------------------------------------------------------------------------------------------------------------------------------------------------------------------------------------------------------------------------------------------------------------------------------------------------------------------------------------------------------------------------------------------------------------------------------|
| <b>Recommendation</b> | <p><b>We suggest using NPPV as early respiratory management in adults with ARDS. (GRADE 2C, Strength of recommendation “weak recommendation” / Quality of evidence: “low”)</b></p> <p>Supplementary conditions: Monitor the patient for clinical improvement within 1-2 hours of NPPV application. Furthermore, confirm whether the patient’s respiratory status meets a predefined goal set in prior to NPPV application within 4-6 hours. When the patient is not clinically improving within 1-2 hours nor achieving the goal within 4-6 hours, the patient should be intubated.</p> |
|-----------------------|-----------------------------------------------------------------------------------------------------------------------------------------------------------------------------------------------------------------------------------------------------------------------------------------------------------------------------------------------------------------------------------------------------------------------------------------------------------------------------------------------------------------------------------------------------------------------------------------|

|                      |                                                                                                                                                                                                                                                                                                                                                                                                                                                                                                                                                                                                                                                                                                                                                                                                                                                                                                                                                                                                                                                                                                                                                                                                                                                                                                                                                                                                                                                                                                                                                                                                                                                                                                                                                                                                                                                                                                                                                                                                                                                                                                                                                                                                                                                                                                                                                                                                                                                                                                                                                                                                                                                                                                                                                                                                                                                                                                                                                                                                                                                   |
|----------------------|---------------------------------------------------------------------------------------------------------------------------------------------------------------------------------------------------------------------------------------------------------------------------------------------------------------------------------------------------------------------------------------------------------------------------------------------------------------------------------------------------------------------------------------------------------------------------------------------------------------------------------------------------------------------------------------------------------------------------------------------------------------------------------------------------------------------------------------------------------------------------------------------------------------------------------------------------------------------------------------------------------------------------------------------------------------------------------------------------------------------------------------------------------------------------------------------------------------------------------------------------------------------------------------------------------------------------------------------------------------------------------------------------------------------------------------------------------------------------------------------------------------------------------------------------------------------------------------------------------------------------------------------------------------------------------------------------------------------------------------------------------------------------------------------------------------------------------------------------------------------------------------------------------------------------------------------------------------------------------------------------------------------------------------------------------------------------------------------------------------------------------------------------------------------------------------------------------------------------------------------------------------------------------------------------------------------------------------------------------------------------------------------------------------------------------------------------------------------------------------------------------------------------------------------------------------------------------------------------------------------------------------------------------------------------------------------------------------------------------------------------------------------------------------------------------------------------------------------------------------------------------------------------------------------------------------------------------------------------------------------------------------------------------------------------|
| <b>Justification</b> | <p><b>Question:</b> Should non-invasive positive pressure ventilation (NPPV) be used as early respiratory management in adult patients with ARDS?</p> <p><b>Patients:</b> Adult Patients with hypoxemia</p> <p><b>Interventions:</b> NPPV</p> <p><b>Comparison:</b> Oxygen therapy, conventional mechanical ventilation</p> <p><b>Outcomes:</b> Short-term mortality Note 1), intubation</p> <p><b>Summary of the evidence:</b> Since it was anticipated that the number of studies concerning the efficacy of early NPPV usage among ARDS patients would be small, we searched for comparative RCTs dealing with the efficacy of NPPV among hypoxemic patients. The choice of whether using oxygen therapy or conventional mechanical ventilation depends primarily on the severity of hypoxemia, hence, in our systematic review, we compared the efficacy of NPPV and that of oxygen therapy, and also, the efficacy of NPPV and that of conventional mechanical ventilation. Moreover, we excluded studies involving patients with COPD or congestive heart failure. This was because it was expected that these studies would strongly support the efficacy of NPPV. As a result, a total of 21 studies were obtained. Among these studies, 17 compared the efficacy of NPPV and that of oxygen therapy and 21 compared the efficacy of NPPV and that of conventional mechanical ventilation.</p> <p>In 17 RCTs comparing NPPV to oxygen therapy, NPPV significantly reduced the mortality (RR 0.71, 95%CI 0.54-0.92). In 16 RCTs comparing NPPV to oxygen therapy, NPPV significantly reduced the intubation (RR 0.58, 95%CI 0.46-0.74). In 4 RCTs comparing NPPV to conventional mechanical ventilation, NPPV significantly reduced the mortality (RR 0.65, 95%CI 0.46-0.93).</p> <p><b>Quality of the evidence:</b> In 17 RCTs comparing NPPV to oxygen therapy, the risk of bias for mortality was ‘not serious’ and the risk of bias for intubation was downgraded by one level and classified as ‘serious’ because open-label fashion seemed to affect on decision of intubation. Inconsistency of results for mortality was downgraded as ‘serious’ since wide variance of point estimates across studies was found and heterogeneity for mortality was moderate (<math>I^2=44\%</math>). However, in terms of intubation, heterogeneity was low (<math>I^2=25\%</math>) and variance of point estimates across studies was not significant, and so inconsistency of results was ‘not serious’. Indirectness was considered as ‘serious’ in both outcomes, mortality and intubation, because of the unmatched study subjects, as subjects included in selected RCTs had hypoxemia, not ARDS. The level of imprecision was ‘not serious’ for mortality and intubation since criteria of the optimal information size (OIS) were met. Based on the above discussion, the overall quality of evidence was evaluated as ‘low’.</p> <p>In 4 RCTs comparing NPPV to conventional mechanical ventilation, the risk of bias for mortality</p> |
|----------------------|---------------------------------------------------------------------------------------------------------------------------------------------------------------------------------------------------------------------------------------------------------------------------------------------------------------------------------------------------------------------------------------------------------------------------------------------------------------------------------------------------------------------------------------------------------------------------------------------------------------------------------------------------------------------------------------------------------------------------------------------------------------------------------------------------------------------------------------------------------------------------------------------------------------------------------------------------------------------------------------------------------------------------------------------------------------------------------------------------------------------------------------------------------------------------------------------------------------------------------------------------------------------------------------------------------------------------------------------------------------------------------------------------------------------------------------------------------------------------------------------------------------------------------------------------------------------------------------------------------------------------------------------------------------------------------------------------------------------------------------------------------------------------------------------------------------------------------------------------------------------------------------------------------------------------------------------------------------------------------------------------------------------------------------------------------------------------------------------------------------------------------------------------------------------------------------------------------------------------------------------------------------------------------------------------------------------------------------------------------------------------------------------------------------------------------------------------------------------------------------------------------------------------------------------------------------------------------------------------------------------------------------------------------------------------------------------------------------------------------------------------------------------------------------------------------------------------------------------------------------------------------------------------------------------------------------------------------------------------------------------------------------------------------------------------|

|                                                 |                                                                                                                                                                                                                                                                                                                                                                                                                                                                                                                                                                                                                                                                                                                                                                                                                                                                                                                                                                                                                                                                                                                                                                                                                                                                                                                                                                                                                                                                                                                                                                                                                                                                                                                                                                                                                                                                                                                                                                                                                                                                                                                                                                                                                                                                                                           |
|-------------------------------------------------|-----------------------------------------------------------------------------------------------------------------------------------------------------------------------------------------------------------------------------------------------------------------------------------------------------------------------------------------------------------------------------------------------------------------------------------------------------------------------------------------------------------------------------------------------------------------------------------------------------------------------------------------------------------------------------------------------------------------------------------------------------------------------------------------------------------------------------------------------------------------------------------------------------------------------------------------------------------------------------------------------------------------------------------------------------------------------------------------------------------------------------------------------------------------------------------------------------------------------------------------------------------------------------------------------------------------------------------------------------------------------------------------------------------------------------------------------------------------------------------------------------------------------------------------------------------------------------------------------------------------------------------------------------------------------------------------------------------------------------------------------------------------------------------------------------------------------------------------------------------------------------------------------------------------------------------------------------------------------------------------------------------------------------------------------------------------------------------------------------------------------------------------------------------------------------------------------------------------------------------------------------------------------------------------------------------|
|                                                 | <p>was 'not serious'. Inconsistency of results for mortality was 'not serious' since heterogeneity was low (<math>I^2=0\%</math>) and variance of point estimates across studies was not significant. Indirectness was considered as 'not serious' although all subjects included in selected RCTs didn't meet criteria of ARDS. The level of imprecision for mortality was 'serious' since criteria of the OIS were not met. Based on the above discussion, the overall quality of evidence was evaluated as 'low'.</p> <p><b>Judgement of benefit and harm, resources and cost:</b> In spite that NPPV has become a treatment that can be used in many hospitals in Japan, cost of NPPV may be higher than that of oxygen therapy or intubation due to price of mechanical ventilator with NPPV mode or specialized to NPPV, interface of NPPV, amount of oxygen required, cost of training for medical staffs, cost of hiring related staffs and so on. On the other hand, there is a possibility that the cost of NPPV may be lower due to avoidance of intubation. Therefore, it cannot be determined that the benefits of NPPV outweigh the harms in patients with ARDS.</p> <p><b>Recommendations:</b> We suggest using NPPV as early respiratory management in adults with ARDS. (GRADE 2C, Strength of recommendation "weak recommendation" / Quality of evidence: "low")</p> <p><b>Additional considerations:</b> Applying NPPV to hypoxemic patients, outcome may vary depending on skill and experience of NPPV among medical staffs. It is suggested that delayed intubation relates to mortality; thus criteria of intubation should be predefined applying NPPV. In addition, most RCTs evaluating benefit of NPPV exclude unconscious patients and hemodynamically unstable patients, hence, applying this recommendation requires cautiousness to such populations.<sup>1</sup></p> <p>At panel meeting, we discussed the validity of wording and eventually we adopted usage of the word "NPPV" instead of non-invasive ventilation (NIV) and "early respiratory management in adults with ARDS" instead of "respiratory management in adults with mild ARDS." And in discussion, we decided to add the comment about need predefined criteria of intubation to the recommendation.</p> |
| <b>Subgroup considerations</b>                  | In RCTs comparing NPPV to oxygen therapy, even when excluding Gupta 2010, in which only patients with asthma attack were included, we obtained similar results (mortality (RR 0.71, 95%CI 0.54–0.92), intubation (RR 0.58, 95%CI 0.46–0.73)) to evaluation of whole RCTs.                                                                                                                                                                                                                                                                                                                                                                                                                                                                                                                                                                                                                                                                                                                                                                                                                                                                                                                                                                                                                                                                                                                                                                                                                                                                                                                                                                                                                                                                                                                                                                                                                                                                                                                                                                                                                                                                                                                                                                                                                                 |
| <b>Implementation considerations</b>            |                                                                                                                                                                                                                                                                                                                                                                                                                                                                                                                                                                                                                                                                                                                                                                                                                                                                                                                                                                                                                                                                                                                                                                                                                                                                                                                                                                                                                                                                                                                                                                                                                                                                                                                                                                                                                                                                                                                                                                                                                                                                                                                                                                                                                                                                                                           |
| <b>Monitoring and evaluation considerations</b> | During NPPV, respiratory status, circulatory status and consciousness and blood gas analysis should be evaluated repeatedly. Monitor the patient for clinical improvement within 1-2 hours of NPPV application. Furthermore, confirm whether the patient's respiratory status meets a predefined goal set in prior to NPPV application within 4-6 hours. When the patient is not clinically improving within 1-2 hours nor achieving the goal within 4-6 hours, the patient should be intubated. One study suggested that delayed intubation is related to higher mortality <sup>2</sup> .                                                                                                                                                                                                                                                                                                                                                                                                                                                                                                                                                                                                                                                                                                                                                                                                                                                                                                                                                                                                                                                                                                                                                                                                                                                                                                                                                                                                                                                                                                                                                                                                                                                                                                                |
| <b>Research possibilities</b>                   | More studies to evaluate the efficacy of NPPV for patients with ARDS are needed. Also, efficacy of other non-invasive respiratory managements such as high-flow nasal therapy should be compared to oxygen therapy, conventional mechanical ventilation and NPPV.                                                                                                                                                                                                                                                                                                                                                                                                                                                                                                                                                                                                                                                                                                                                                                                                                                                                                                                                                                                                                                                                                                                                                                                                                                                                                                                                                                                                                                                                                                                                                                                                                                                                                                                                                                                                                                                                                                                                                                                                                                         |

Note 1) Mortality in hospital or in ICU.

#### References

1. Esteban A, Frutos-Vivar F, Ferguson ND, et al. Noninvasive positive-pressure ventilation for respiratory failure after extubation. *The New England journal of medicine* **350**(24): 2452-60, 2004. PMID 15190137
2. Epstein SK, Ciubotaru RL. Independent effects of etiology of failure and time to reintubation on outcome for patients failing extubation. *American journal of respiratory and critical care medicine* **158**(2): 489-93, 1998. PMID 9700126

## CQ03. Study flow diagram

\*This CQ was partly evaluated by Petrucci using Cochrane database (to Sep 2012)<sup>1</sup>. We also searched literature from Sep 2011 to May 2015.

1. Petrucci N, De Feo C. Lung protective ventilation strategy for the acute respiratory distress syndrome. Cochrane database of systematic reviews. 2:CD003844 2013, PMID 23450544

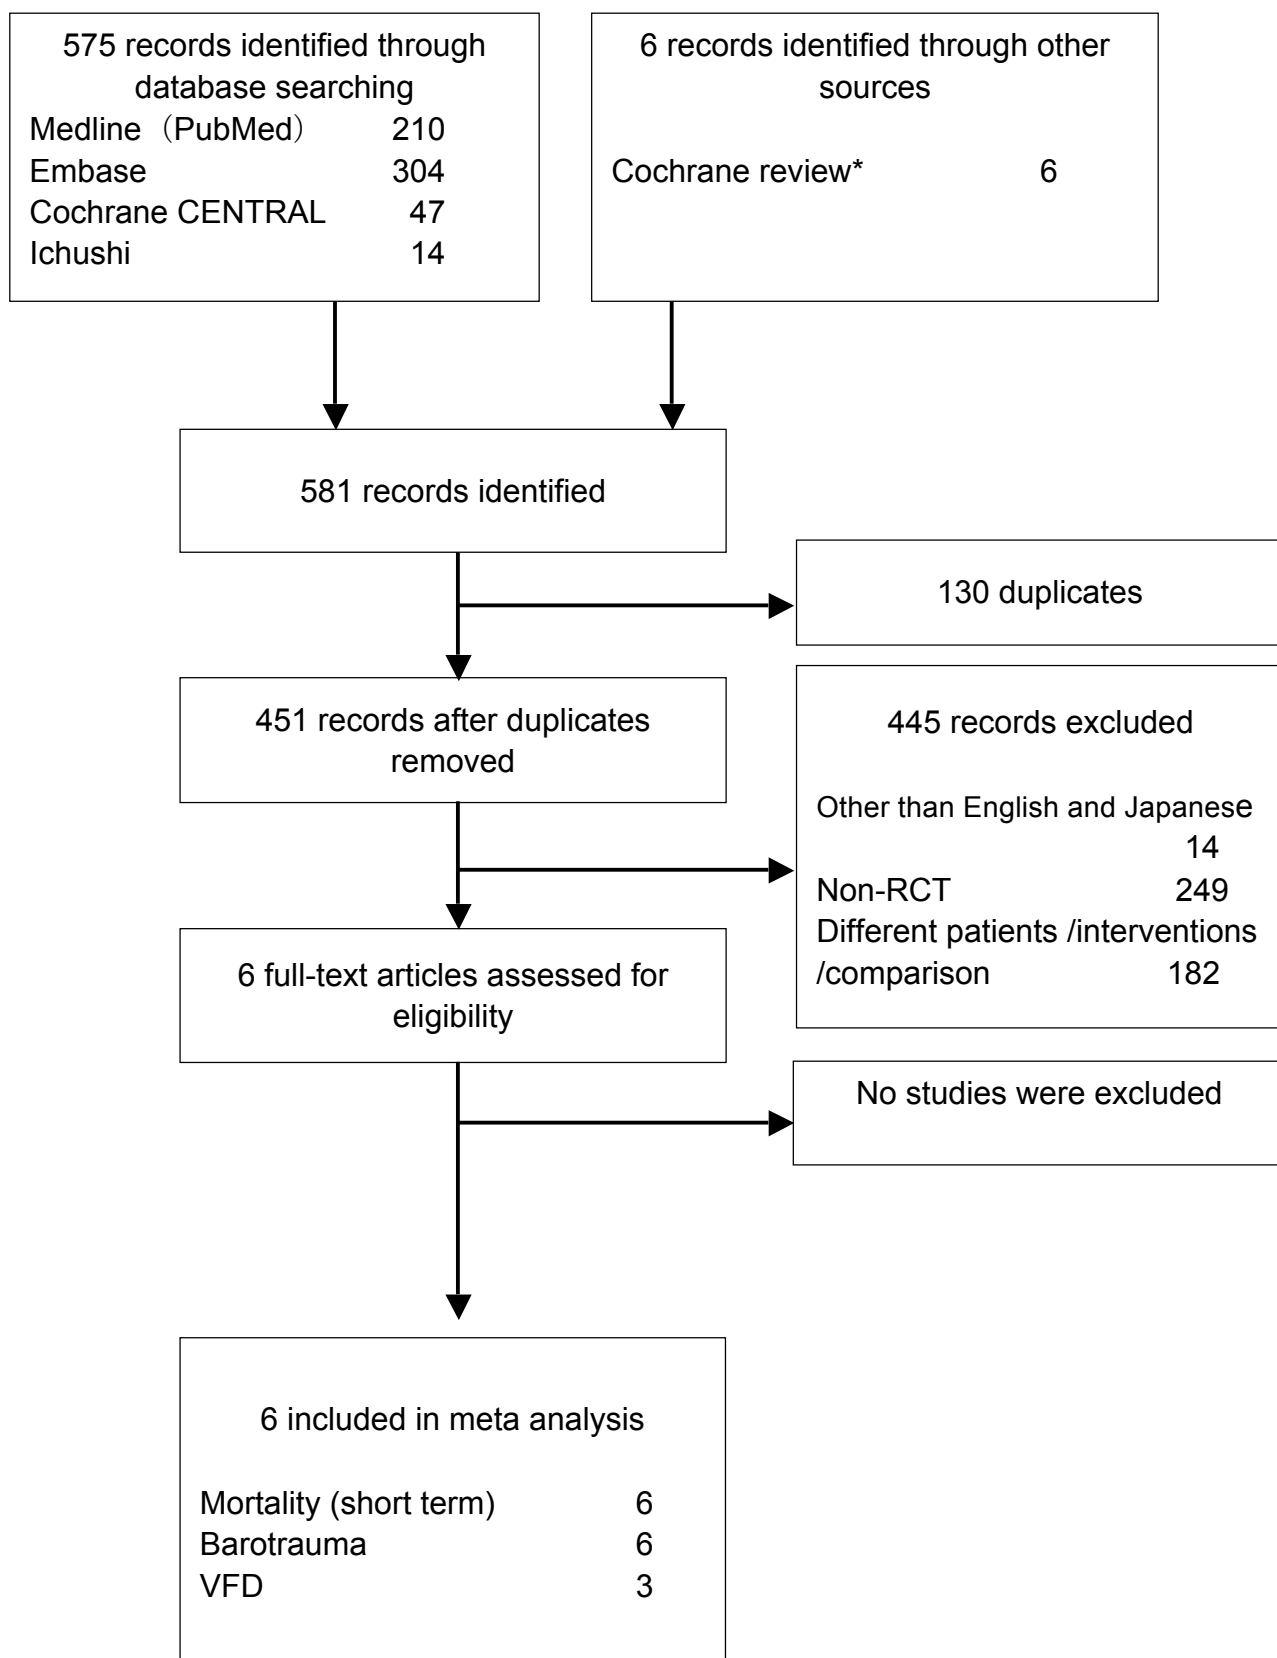



| Outcome |                                      | Short term mortality                      | risk of bias                       |                                           | not serious (0)                           |                                         |                                                 |                                                      |                                              |
|---------|--------------------------------------|-------------------------------------------|------------------------------------|-------------------------------------------|-------------------------------------------|-----------------------------------------|-------------------------------------------------|------------------------------------------------------|----------------------------------------------|
| 番号      | 著者名 発表年<br>(Forest plot表示)           | risk of bias評価                            |                                    |                                           |                                           |                                         |                                                 |                                                      |                                              |
|         |                                      | ランダム割付順序の生成<br>random sequence generation | 割り付けの隠蔽化<br>allocation concealment | ブラインド<br>blinding                         |                                           | 不完全なアウトカムデータ<br>incomplete outcome data | 選択されたアウトカムの報告<br>selective outcome reporting    | その他のバイアス<br>Other sources of bias                    | 研究内でのバイアスのリスク<br>Risk of bias within a study |
|         |                                      |                                           |                                    | 研究参加者と治療提供者<br>participants and personnel | アウトカム評価者<br>outcome assessors             |                                         |                                                 |                                                      |                                              |
| 1       | Amato 1998 (in-hospital mortality)   | Low risk                                  | Low risk                           | High risk                                 | Unclear risk                              | Low risk                                | Unclear risk                                    | High risk                                            | Unclear risk                                 |
| 2       | Brochard 1998 (60days)               | Low risk                                  | Low risk                           | High risk                                 | Unclear risk                              | Low risk                                | Unclear risk                                    | Low risk                                             | Low risk                                     |
| 3       | Stewart 1998 (in-hospital mortality) | Low risk                                  | Low risk                           | High risk                                 | Unclear risk                              | Low risk                                | Unclear risk                                    | Low risk                                             | Low risk                                     |
| 4       | Brower 1999(in-hospital mortality)   | Unclear risk                              | Low risk                           | High risk                                 | Unclear risk                              | Low risk                                | Unclear risk                                    | Low risk                                             | Unclear risk                                 |
| 5       | ARDS network 2000 (180days)          | Low risk                                  | Low risk                           | High risk                                 | Unclear risk                              | Low risk                                | Low risk                                        | High risk                                            | Unclear risk                                 |
| 6       | Villar 2006 (in-hospital mortality)  | Low risk                                  | Low risk                           | High risk                                 | Unclear risk                              | Low risk                                | Unclear risk                                    | High risk                                            | Unclear risk                                 |
|         |                                      |                                           |                                    |                                           |                                           |                                         |                                                 |                                                      |                                              |
| 番号      | 著者名 発表年<br>(Forest plot表示)           | risk of biasコメント                          |                                    |                                           |                                           |                                         |                                                 |                                                      |                                              |
| 1       | Amato 1998                           | 封筒法                                       | 隠蔽化されている                           | 換気量の違いをblindすることはできない                     | Blindに関しては不明だが、結果の評価についてバイアスが生じる可能性は低い    | 100%報告されている                             | protocolが不明である                                  | 中間解析に基づき、研究が早期中断されている (stopping early for benefits)  | high 2項目、Unclear2項目、low2項目でunclearに引き下げ      |
| 2       | Brochard 1998                        | 封筒法                                       | 隠蔽化されている                           | 一回換気量の違いを盲検化することは不可能                      | Blindに関しては不明だが、結果の評価についてバイアスが生じる可能性は低い    | 100%報告されている                             | protocolを参照できない                                 | ただし中間解析で両群に有意差なく早期中止されている                            | 多くはlow riskで総合的にlow riskと判断                  |
| 3       | Stewart 1998                         | 中央コンピューター方式                               | 隠蔽化されている                           | 一回換気量の違いを盲検化することは不可能                      | Blindに関しては不明だが、結果の評価についてバイアスが生じる可能性は低い    | 100%報告されている                             | protocolを参照できない                                 | ただし、sample sizeの計算についての記載がなく、統計学的パワーは不明              | 多くはlow riskで総合的に判断                           |
| 4       | Brower 1999                          | 不明                                        | 隠蔽化されている                           | 一回換気量の違いを盲検化することは不可能                      | Blindに関しては不明だが、結果の評価についてバイアスが生じる可能性は低い    | 100%報告されている                             | protocolを参照できない                                 | ただし、中間解析に基づき、研究が早期中止されている                            | low3項目、unclear3項目で下方修正                       |
| 5       | ARDS network 2000                    | センターでの音声システムを使用した                         | 隠蔽化されている                           | tidal volumeの違いを盲検化することは不可能               | Blindはされているか不明。しかし結果の評価についてバイアスが生じる可能性は低い | なし                                      | 主要なアウトカムの全てが報告されている。ただし、28日死亡は文献の生存曲線より得たものである。 | 中間解析に基づき、研究が早期中断されている (stopping early for benefits). | High risk 2項目でunclear riskに引き下げ              |
| 6       | Villar 2006                          | 封筒法                                       | 隠蔽化されている                           | 一回換気量の違いを盲検化することは不可能                      | Blindに関しては不明だが、結果の評価についてバイアスが生じる可能性は低い    | 100%報告されている                             | protocolを参照できない                                 | 中間解析に基づき、研究が早期中断されている (stopping early for benefits)  | high2項目、unclear2項目でunclear riskに引き下げ         |

CG03  
Risk of bias table, barotrauma

| Outcome |                            | Barotrauma                                |                                    | risk of bias                              |                                           | serious (-1)                              |                                              |                                                     |                                              |
|---------|----------------------------|-------------------------------------------|------------------------------------|-------------------------------------------|-------------------------------------------|-------------------------------------------|----------------------------------------------|-----------------------------------------------------|----------------------------------------------|
| 番号      | 著者名 発表年<br>(Forest plot表示) | risk of bias評価                            |                                    |                                           |                                           |                                           |                                              |                                                     |                                              |
|         |                            | ランダム割付順序の生成<br>random sequence generation | 割り付けの隠蔽化<br>allocation concealment | ブラインド<br>blinding                         |                                           | 不完全なアウトカムデータ<br>incomplete outcome data   | 選択されたアウトカムの報告<br>selective outcome reporting | その他のバイアス<br>Other sources of bias                   | 研究内でのバイアスのリスク<br>Risk of bias within a study |
|         |                            |                                           |                                    | 研究参加者と治療提供者<br>participants and personnel | アウトカム評価者<br>outcome assessors             |                                           |                                              |                                                     |                                              |
| 1       | Amato 1998                 | Low risk                                  | Low risk                           | High risk                                 | Unclear risk                              | Low risk                                  | Unclear risk                                 | High risk                                           | Unclear risk                                 |
| 2       | Brochard 1998              | Low risk                                  | Low risk                           | High risk                                 | Unclear risk                              | Low risk                                  | Unclear risk                                 | Low risk                                            | Low risk                                     |
| 3       | Stewart 1998               | Low risk                                  | Low risk                           | High risk                                 | Unclear risk                              | Low risk                                  | Unclear risk                                 | Low risk                                            | Low risk                                     |
| 4       | Brower 1999                | Unclear risk                              | Low risk                           | High risk                                 | Unclear risk                              | Low risk                                  | Unclear risk                                 | Low risk                                            | Unclear risk                                 |
| 5       | ARDS network 2000          | Low risk                                  | Low risk                           | High risk                                 | Unclear risk                              | Low risk                                  | Low risk                                     | High risk                                           | Unclear risk                                 |
| 6       | Villar 2006                | Low risk                                  | Low risk                           | High risk                                 | Unclear risk                              | High risk                                 | Unclear risk                                 | High risk                                           | High risk                                    |
|         |                            |                                           |                                    |                                           |                                           |                                           |                                              |                                                     |                                              |
| 番号      | 著者名 発表年<br>(Forest plot表示) | risk of biasコメント                          |                                    |                                           |                                           |                                           |                                              |                                                     |                                              |
| 1       | Amato 1998                 | 封筒法                                       | 隠蔽化されている                           | 換気量の違いをblindすることはできない                     | Blindに関しては不明だが、結果の評価についてバイアスが生じる可能性は低い    | 100%報告されている                               | protocolが不明である                               | 中間解析に基づき、研究が早期中断されている (stopping early for benefits) | high 2項目、Unclear2項目、low2項目でunclearに引き下げ      |
| 2       | Brochard 1998              | 封筒法                                       | 隠蔽化されている                           | 一回換気量の違いを盲検化することは不可能                      | Blindに関しては不明だが、結果の評価についてバイアスが生じる可能性は低い    | 100%報告されている                               | protocolを参照できない                              | ただし中間解析で両群に有意差なく早期中止されている                           | 多くはlow riskで総合的にlow riskと判断                  |
| 3       | Stewart 1998               | 中央コンピューター方式                               | 隠蔽化されている                           | 一回換気量の違いを盲検化することは不可能                      | Blindに関しては不明だが、結果の評価についてバイアスが生じる可能性は低い    | 100%報告されている                               | protocolを参照できない                              | ただし、sample sizeの計算についての記載がなく、統計学的パワーは不明             | 多くはlow riskで総合的に判断                           |
| 4       | Brower 1999                | 不明                                        | 隠蔽化されている                           | 一回換気量の違いを盲検化することは不可能                      | Blindに関しては不明だが、結果の評価についてバイアスが生じる可能性は低い    | 100%報告されている                               | protocolを参照できない                              | ただし、中間解析に基づき、有意差なしとして研究が早期中止されている                   | low3項目、unclear3項目で下方修正                       |
| 5       | ARDS network 2000          | センターでの音声システムを使用した                         | 隠蔽化されている                           | 一回換気量の違いを盲検化することは不可能                      | Blindはされているか不明。しかし結果の評価についてバイアスが生じる可能性は低い | なし                                        | 主要なアウトカムの全てが報告されている                          | 中間解析に基づき、研究が早期中断されている (stopping early for benefits) | High risk 2項目でunclear riskに引き下げ              |
| 6       | Villar 2006                | 封筒法                                       | 隠蔽化されている                           | 一回換気量の違いを盲検化することは不可能                      | Blindに関しては不明だが、結果の評価についてバイアスが生じる可能性は低い    | protocol逸脱が103人中8人いて、解析から除外されている。ITT解析でない | protocolを参照できない                              | 中間解析に基づき、研究が早期中断されている (stopping early for benefits) | high3項目、unclear2項目でHigh riskに引き下げ            |

| Outcome |                            | VFD                                       |                                    | risk of bias                              |                                           | serious (-1)                              |                                                                |                                                     |                                              |
|---------|----------------------------|-------------------------------------------|------------------------------------|-------------------------------------------|-------------------------------------------|-------------------------------------------|----------------------------------------------------------------|-----------------------------------------------------|----------------------------------------------|
| 番号      | 著者名 発表年<br>(Forest plot表示) | risk of bias評価                            |                                    |                                           |                                           |                                           |                                                                |                                                     |                                              |
|         |                            | ランダム割付順序の生成<br>random sequence generation | 割り付けの隠蔽化<br>allocation concealment | ブラインド<br>blinding                         |                                           | 不完全なアウトカムデータ<br>incomplete outcome data   | 選択されたアウトカムの報告<br>selective outcome reporting                   | その他のバイアス<br>Other sources of bias                   | 研究内でのバイアスのリスク<br>Risk of bias within a study |
|         |                            |                                           |                                    | 研究参加者と治療提供者<br>participants and personnel | アウトカム評価者<br>outcome assessors             |                                           |                                                                |                                                     |                                              |
| 1       | Brower 1999                | Unclear risk                              | Low risk                           | High risk                                 | Unclear risk                              | Low risk                                  | Unclear risk                                                   | Low risk                                            | Unclear risk                                 |
| 2       | ARDS network 2000          | Low risk                                  | Low risk                           | High risk                                 | Unclear risk                              | Low risk                                  | Low risk                                                       | High risk                                           | Unclear risk                                 |
| 3       | Villar 2006                | Low risk                                  | Low risk                           | High risk                                 | Unclear risk                              | High risk                                 | Unclear risk                                                   | High risk                                           | High risk                                    |
|         |                            |                                           |                                    |                                           |                                           |                                           |                                                                |                                                     |                                              |
| 番号      | 著者名 発表年<br>(Forest plot表示) | risk of biasコメント                          |                                    |                                           |                                           |                                           |                                                                |                                                     |                                              |
| 1       | Brower 1999                | 不明                                        | 隠蔽化されている                           | 一回換気量の違いを盲検化することは不可能                      | Blindに関しては不明だが、結果の評価についてバイアスが生じる可能性は低い    | 100%報告されている                               | protocolを参照できない。VFD28daysは著者に問い合わせで得られたデータである。Unpublished data | ただし、中間解析に基づき、有意差なしとして研究が早期中止されている                   | low3項目、unclear3項目で下方修正                       |
| 2       | ARDS network 2000          | センターでの音声システムを使用した                         | 隠蔽化されている                           | 一回換気量の違いを盲検化することは不可能                      | Blindはされているか不明。しかし結果の評価についてバイアスが生じる可能性は低い | なし                                        | 主要なアウトカムの全てが報告されている                                            | 中間解析に基づき、研究が早期中断されている (stopping early for benefits) | High risk 2項目でUnclear riskに引き下げ              |
| 3       | Villar 2006                | 封筒法                                       | 隠蔽化されている                           | 一回換気量の違いを盲検化することは不可能                      | Blindに関しては不明だが、結果の評価についてバイアスが生じる可能性は低い    | protocol逸脱が103人中8人いて、解析から除外されている。ITT解析でない | protocolを参照できない                                                | 中間解析に基づき、研究が早期中断されている (stopping early for benefits) | high3項目、unclear2項目でHigh riskに引き下げ            |

## Short term mortality

|                   | Random sequence generation (selection bias) | Allocation concealment (selection bias) | Blinding of participants and personnel (performance bias) | Blinding of outcome assessment (detection bias) | Incomplete outcome data (attrition bias) | Selective reporting (reporting bias) | Other bias |
|-------------------|---------------------------------------------|-----------------------------------------|-----------------------------------------------------------|-------------------------------------------------|------------------------------------------|--------------------------------------|------------|
| Amato 1998        | +                                           | +                                       | -                                                         | ?                                               | +                                        | ?                                    | -          |
| ARDS network 2000 | +                                           | +                                       | -                                                         | ?                                               | +                                        | +                                    | -          |
| Brochard 1998     | +                                           | +                                       | -                                                         | ?                                               | +                                        | ?                                    | +          |
| Brower 1999       | ?                                           | +                                       | -                                                         | ?                                               | +                                        | ?                                    | +          |
| Stewart 1998      | +                                           | +                                       | -                                                         | ?                                               | +                                        | ?                                    | +          |
| Villar 2006       | +                                           | +                                       | -                                                         | ?                                               | +                                        | ?                                    | -          |

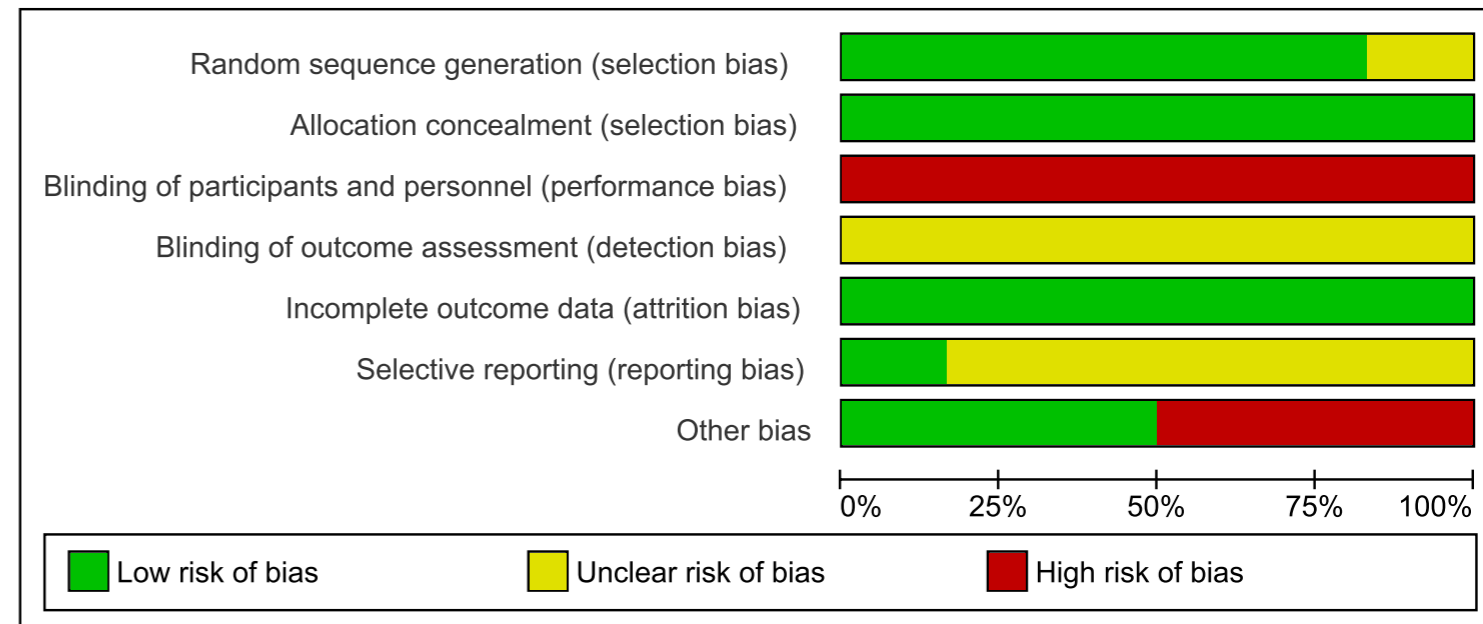

# Barotrauma

|                   | Random sequence generation (selection bias) | Allocation concealment (selection bias) | Blinding of participants and personnel (performance bias) | Blinding of outcome assessment (detection bias) | Incomplete outcome data (attrition bias) | Selective reporting (reporting bias) | Other bias |
|-------------------|---------------------------------------------|-----------------------------------------|-----------------------------------------------------------|-------------------------------------------------|------------------------------------------|--------------------------------------|------------|
| Amato 1998        | +                                           | +                                       | -                                                         | ?                                               | +                                        | ?                                    | -          |
| ARDS network 2000 | +                                           | +                                       | -                                                         | ?                                               | +                                        | +                                    | -          |
| Brochard 1998     | +                                           | +                                       | -                                                         | ?                                               | +                                        | ?                                    | +          |
| Brower 1999       | ?                                           | +                                       | -                                                         | ?                                               | +                                        | ?                                    | +          |
| Stewart 1998      | +                                           | +                                       | -                                                         | ?                                               | +                                        | ?                                    | +          |
| Villar 2006       | +                                           | +                                       | -                                                         | ?                                               | -                                        | ?                                    | -          |

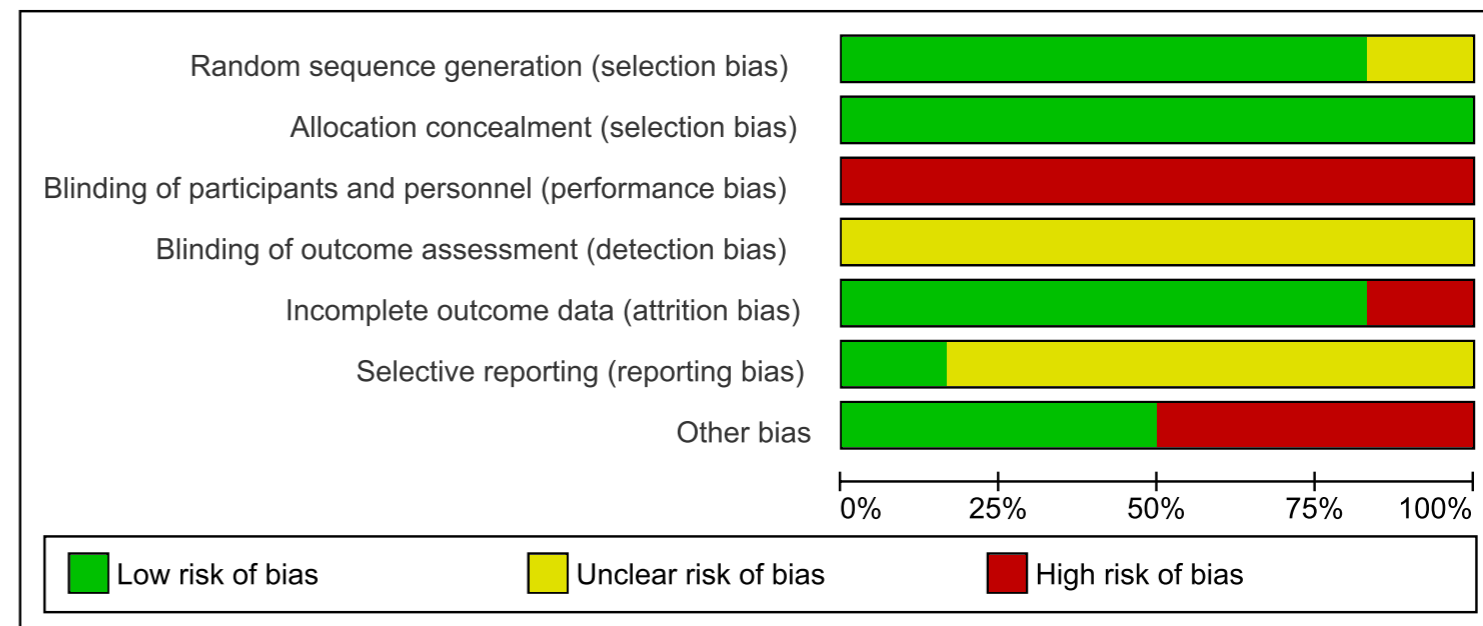

# VFD

|                   | Random sequence generation (selection bias) | Allocation concealment (selection bias) | Blinding of participants and personnel (performance bias) | Blinding of outcome assessment (detection bias) | Incomplete outcome data (attrition bias) | Selective reporting (reporting bias) | Other bias |
|-------------------|---------------------------------------------|-----------------------------------------|-----------------------------------------------------------|-------------------------------------------------|------------------------------------------|--------------------------------------|------------|
| ARDS network 2000 | +                                           | +                                       | -                                                         | ?                                               | +                                        | +                                    | -          |
| Brower 1999       | ?                                           | +                                       | -                                                         | ?                                               | +                                        | ?                                    | +          |
| Villar 2006       | +                                           | +                                       | -                                                         | ?                                               | -                                        | ?                                    | -          |

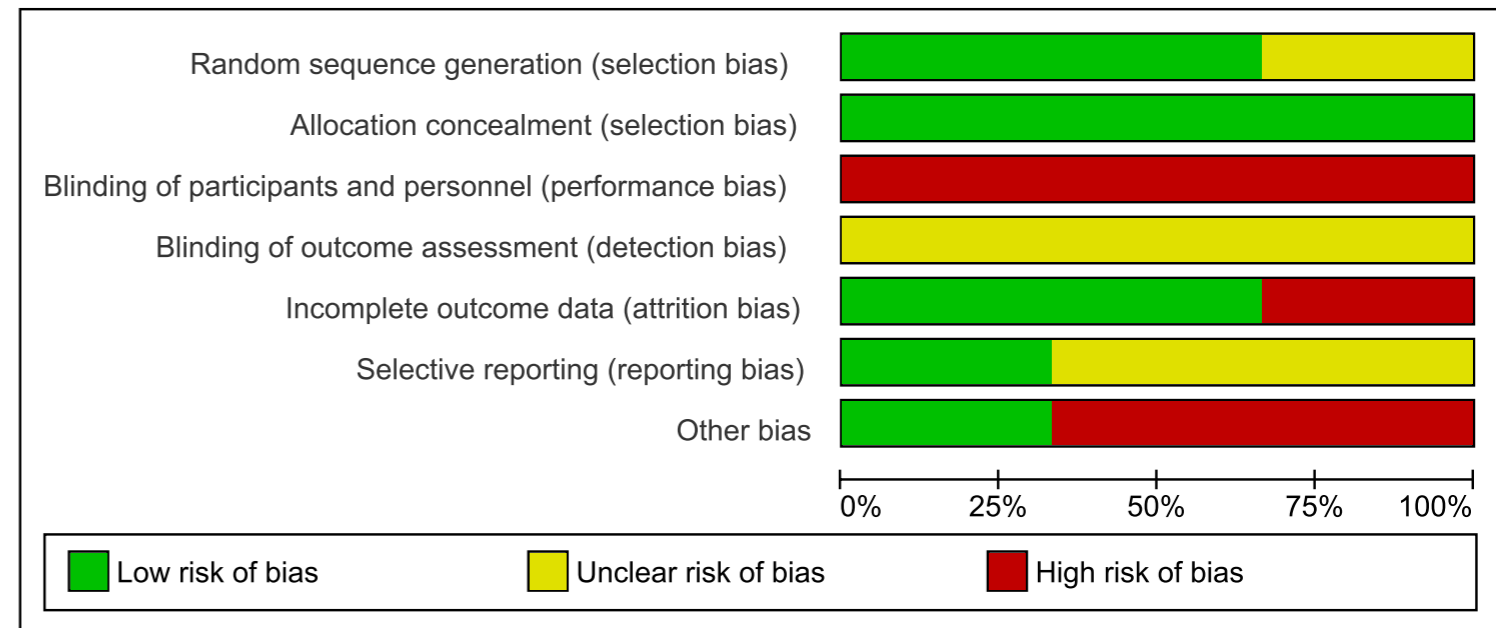

### Short term mortality

| Study or Subgroup     | lower tidal volume |            | conventional tidal volume |            | Weight        | Risk Ratio               |
|-----------------------|--------------------|------------|---------------------------|------------|---------------|--------------------------|
|                       | Events             | Total      | Events                    | Total      |               | M-H, Random, 95% CI      |
| Amato 1998            | 13                 | 29         | 17                        | 24         | 13.9%         | 0.63 [0.39, 1.02]        |
| ARDS network 2000     | 112                | 432        | 150                       | 429        | 26.4%         | 0.74 [0.60, 0.91]        |
| Brochard 1998         | 27                 | 58         | 22                        | 58         | 15.7%         | 1.23 [0.80, 1.89]        |
| Brower 1999           | 13                 | 26         | 12                        | 26         | 11.3%         | 1.08 [0.62, 1.91]        |
| Stewart 1998          | 30                 | 60         | 28                        | 60         | 18.1%         | 1.07 [0.74, 1.55]        |
| Villar 2006           | 17                 | 53         | 28                        | 50         | 14.5%         | 0.57 [0.36, 0.91]        |
| <b>Total (95% CI)</b> |                    | <b>658</b> |                           | <b>647</b> | <b>100.0%</b> | <b>0.84 [0.67, 1.07]</b> |

Total events: 212 (lower tidal volume), 257 (conventional tidal volume)  
 Heterogeneity:  $\tau^2 = 0.04$ ;  $\chi^2 = 10.71$ ,  $df = 5$  ( $P = 0.06$ );  $I^2 = 53\%$   
 Test for overall effect:  $Z = 1.42$  ( $P = 0.16$ )

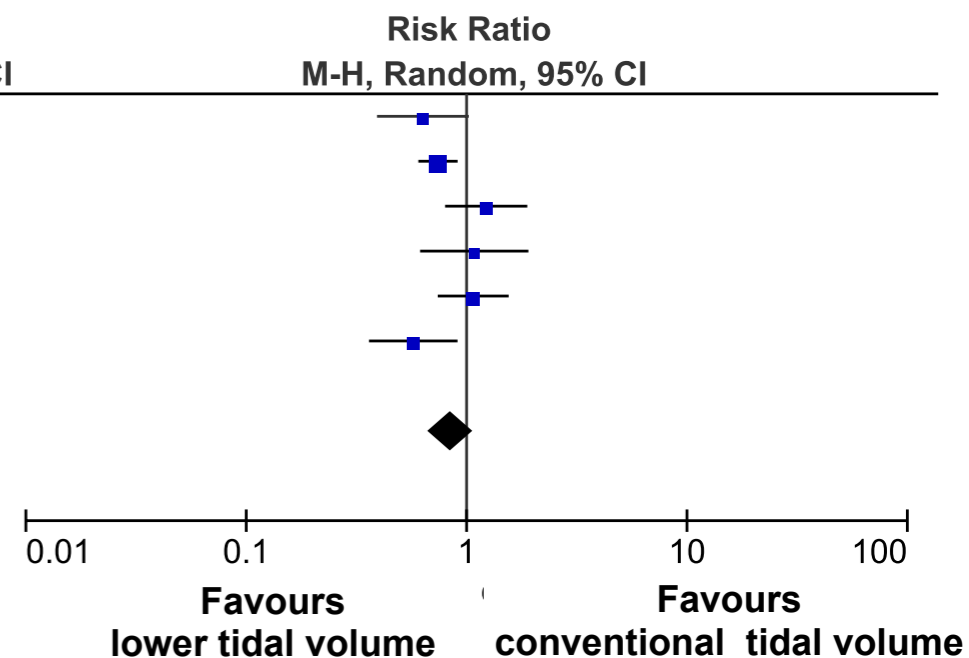

### Barotrauma

| Study or Subgroup     | lower tidal volume |            | conventional tidal volume |            | Weight        | Risk Ratio               |
|-----------------------|--------------------|------------|---------------------------|------------|---------------|--------------------------|
|                       | Events             | Total      | Events                    | Total      |               | M-H, Random, 95% CI      |
| Amato 1998            | 2                  | 29         | 10                        | 24         | 11.3%         | 0.17 [0.04, 0.68]        |
| ARDS network 2000     | 43                 | 432        | 47                        | 429        | 40.9%         | 0.91 [0.61, 1.34]        |
| Brochard 1998         | 8                  | 58         | 7                         | 58         | 19.9%         | 1.14 [0.44, 2.95]        |
| Brower 1999           | 2                  | 26         | 1                         | 26         | 4.8%          | 2.00 [0.19, 20.72]       |
| Stewart 1998          | 6                  | 60         | 4                         | 60         | 14.3%         | 1.50 [0.45, 5.05]        |
| Villar 2006           | 2                  | 50         | 4                         | 45         | 8.8%          | 0.45 [0.09, 2.34]        |
| <b>Total (95% CI)</b> |                    | <b>655</b> |                           | <b>642</b> | <b>100.0%</b> | <b>0.82 [0.48, 1.41]</b> |

Total events: 63 (lower tidal volume), 73 (conventional tidal volume)  
 Heterogeneity:  $\tau^2 = 0.14$ ;  $\chi^2 = 7.55$ ,  $df = 5$  ( $P = 0.18$ );  $I^2 = 34\%$   
 Test for overall effect:  $Z = 0.71$  ( $P = 0.48$ )

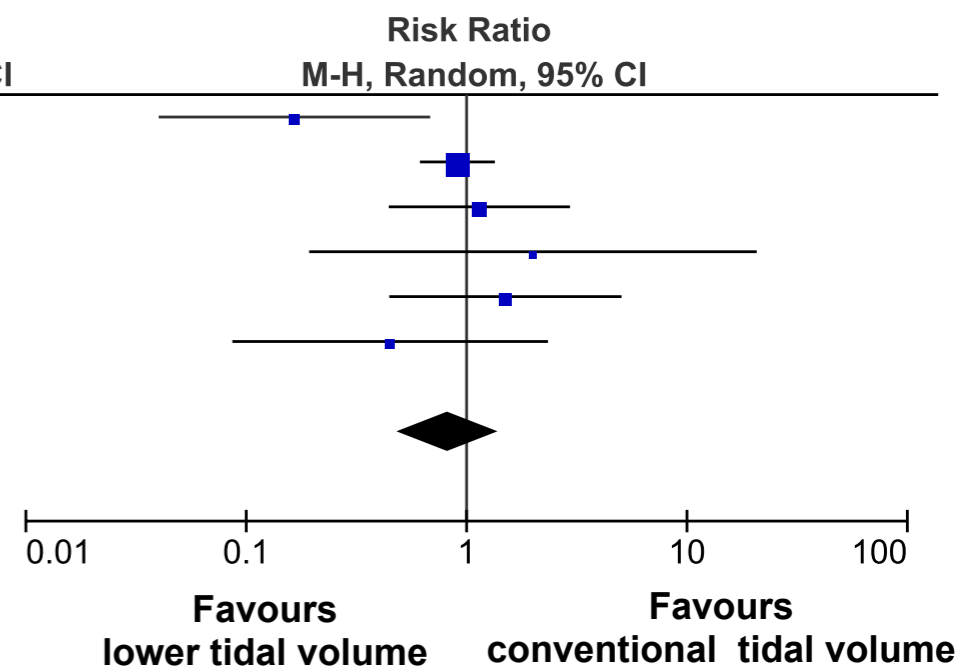

### VFD

| Study or Subgroup     | lower tidal volume |      |            | conventional tidal volume |      |            | Weight        | Mean Difference          |
|-----------------------|--------------------|------|------------|---------------------------|------|------------|---------------|--------------------------|
|                       | Mean               | SD   | Total      | Mean                      | SD   | Total      |               | IV, Random, 95% CI       |
| ARDS network 2000     | 12                 | 11   | 432        | 10                        | 11   | 429        | 63.8%         | 2.00 [0.53, 3.47]        |
| Brower 1999           | 9.62               | 10.3 | 26         | 9.27                      | 9.77 | 26         | 11.7%         | 0.35 [-5.11, 5.81]       |
| Villar 2006           | 10.9               | 9.4  | 50         | 6                         | 7.9  | 45         | 24.5%         | 4.90 [1.42, 8.38]        |
| <b>Total (95% CI)</b> |                    |      | <b>508</b> |                           |      | <b>500</b> | <b>100.0%</b> | <b>2.52 [0.53, 4.51]</b> |

Heterogeneity:  $\tau^2 = 1.06$ ;  $\chi^2 = 2.79$ ,  $df = 2$  ( $P = 0.25$ );  $I^2 = 28\%$   
 Test for overall effect:  $Z = 2.48$  ( $P = 0.01$ )

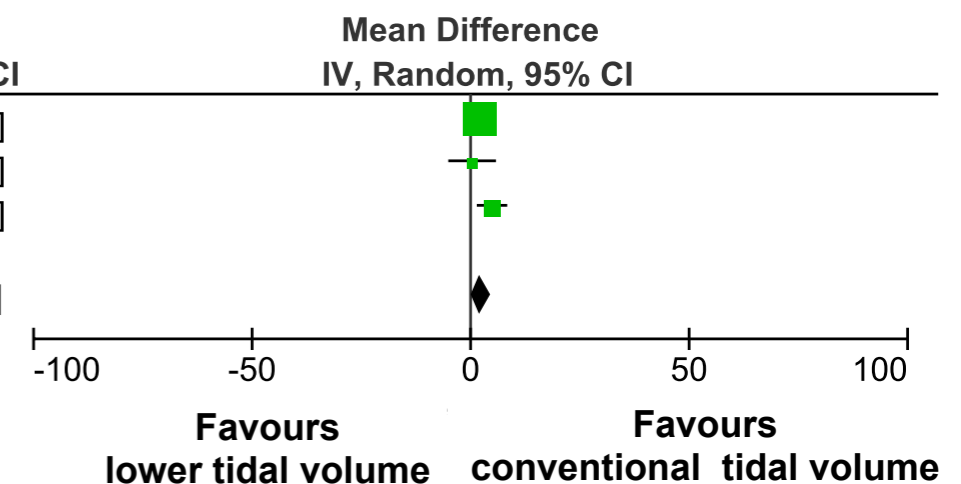

## Summary of findings:

## CQ03 : Should low tidal volume be used in adult patients with ARDS?

Patient or population: [health problem]

Setting:

Intervention: lower tidal volume

Comparison: conventional tidal volume

| Outcomes   | Anticipated absolute effects* (95% CI) |                                               | Relative effect (95% CI)  | № of participants (studies) | Quality of the evidence (GRADE)     | Comments |
|------------|----------------------------------------|-----------------------------------------------|---------------------------|-----------------------------|-------------------------------------|----------|
|            | Risk with conventional tidal volume    | Risk with lower tidal volume                  |                           |                             |                                     |          |
| mortality  | Study population                       |                                               | RR 0.84<br>(0.67 to 1.07) | 1305<br>(6 RCTs)            | ⊕⊕○○<br>LOW <sup>1,2,5</sup>        |          |
|            | 397 per 1000                           | <b>334 per 1000</b><br>(266 to 425)           |                           |                             |                                     |          |
|            | Low                                    |                                               |                           |                             |                                     |          |
|            | 380 per 1000                           | <b>319 per 1000</b><br>(255 to 407)           |                           |                             |                                     |          |
|            | High                                   |                                               |                           |                             |                                     |          |
|            | 560 per 1000                           | <b>470 per 1000</b><br>(375 to 599)           |                           |                             |                                     |          |
| barotrauma | Study population                       |                                               | RR 0.82<br>(0.48 to 1.41) | 1297<br>(6 RCTs)            | ⊕○○○<br>VERY LOW <sup>2,3,4,5</sup> |          |
|            | 114 per 1000                           | <b>93 per 1000</b><br>(55 to 160)             |                           |                             |                                     |          |
|            | Low                                    |                                               |                           |                             |                                     |          |
|            | 38 per 1000                            | <b>31 per 1000</b><br>(18 to 54)              |                           |                             |                                     |          |
|            | High                                   |                                               |                           |                             |                                     |          |
|            | 120 per 1000                           | <b>98 per 1000</b><br>(58 to 169)             |                           |                             |                                     |          |
| VFD        | Mean <b>8.93 days</b>                  | 2.52 days more MD<br>(0.53 more to 4.51 more) | -                         | 1008<br>(3 RCTs)            | ⊕⊕⊕○<br>MODERATE <sup>3</sup>       |          |

\*The risk in the intervention group (and its 95% confidence interval) is based on the assumed risk in the comparison group and the relative effect of the intervention (and its 95% CI).

CI: Confidence interval; RR: Risk ratio; MD: Mean difference

## GRADE Working Group grades of evidence

**High quality:** We are very confident that the true effect lies close to that of the estimate of the effect

**Moderate quality:** We are moderately confident in the effect estimate: The true effect is likely to be close to the estimate of the effect, but there is a possibility that it is substantially different

**Low quality:** Our confidence in the effect estimate is limited: The true effect may be substantially different from the estimate of the effect

**Very low quality:** We have very little confidence in the effect estimate: The true effect is likely to be substantially different from the estimate of effect

1. Significant heterogeneity with  $I^2=50\%$
2. Different length of follow-up period
3. More than half of studies had unclear or high risk of bias
4. Different definition of barotrauma
5. Wide confidence limits



## CQ3

## Question: Low tidal volume compared with conventional tidal volume ventilation for adult patients with ARDS

| Quality assessment   |                   |                      |                        |              |                      |                      | № of patients      |                           | Effect                 |                                               | Quality             | Importance |
|----------------------|-------------------|----------------------|------------------------|--------------|----------------------|----------------------|--------------------|---------------------------|------------------------|-----------------------------------------------|---------------------|------------|
| № of studies         | Study design      | Risk of bias         | Inconsistency          | Indirectness | Imprecision          | Other considerations | lower tidal volume | conventional tidal volume | Relative (95% CI)      | Absolute (95% CI)                             |                     |            |
| Short-term mortality |                   |                      |                        |              |                      |                      |                    |                           |                        |                                               |                     |            |
| 6                    | Randomized trials | Not serious          | Serious <sup>1,2</sup> | Not serious  | Serious <sup>5</sup> | None                 | 212/658 (32.2%)    | 257/647 (39.7%)           | RR 0.84 (0.67 to 1.07) | 64 fewer per 1000 (from 28 more to 131 fewer) | ⊕ ⊕ ⊖ ⊖<br>LOW      | CRITICAL   |
|                      |                   |                      |                        |              |                      |                      |                    | 38.0%                     |                        | 61 fewer per 1000 (from 27 more to 125 fewer) |                     |            |
|                      |                   |                      |                        |              |                      |                      |                    | 56.0%                     |                        | 90 fewer per 1000 (from 39 more to 185 fewer) |                     |            |
| barotrauma           |                   |                      |                        |              |                      |                      |                    |                           |                        |                                               |                     |            |
| 6                    | randomised trials | serious <sup>3</sup> | serious <sup>2,4</sup> | not serious  | serious <sup>5</sup> | none                 | 63/655 (9.6%)      | 73/642 (11.4%)            | RR 0.82 (0.48 to 1.41) | 20 fewer per 1000 (from 47 more to 59 fewer)  | ⊕ ⊖ ⊖ ⊖<br>VERY LOW | CRITICAL   |
|                      |                   |                      |                        |              |                      |                      |                    | 3.8%                      |                        | 7 fewer per 1000 (from 16 more to 20 fewer)   |                     |            |
|                      |                   |                      |                        |              |                      |                      |                    | 12.0%                     |                        | 22 fewer per 1000 (from 49 more to 62 fewer)  |                     |            |
| VFD                  |                   |                      |                        |              |                      |                      |                    |                           |                        |                                               |                     |            |
| 3                    | randomised trials | serious <sup>3</sup> | not serious            | not serious  | not serious          | none                 | 508                | 500                       | -                      | MD 2.52 more (0.53 more to 4.51 more)         | ⊕ ⊕ ⊕ ⊖<br>MODERATE | CRITICAL   |

CI: Confidence interval; RR: Risk ratio; MD: Mean difference

1. Significant heterogeneity with  $I^2=50\%$
2. Different length of follow-up period
3. More than half of studies had unclear or high risk of bias
4. Different definition of barotrauma
5. Wide confidence limits

Evidence-to-Decision table

**CQ03 : Should low tidal volume be used in adult patients with ARDS?**

PATIENTS: ADULT PATIENTS WITH ARDS

INTERVENTION: LOW TIDAL VOLUME

| CRITERIA                                                                                        | JUDGEMENTS                                                                                                                                                                                                                                                                                                                                              | RESERCH EVIDENCE                                                                                                                                                                                                                                                                                                                                                                                                                                   | ADDITIONAL CONSIDERRATIONS                                                                                                                                                                                                                                                                                                                                                                                                                                                                                                                                                                                                                                                                                                                                                                                                                                                                                                                                                                                                                                                                                                                                                                                                                                                                                                                                                                                                                                                                                                                                                                                                                                                                                                                                                                                                                                                                                                                          |                                   |                     |                                   |                                            |          |             |            |          |                  |                         |          |                  |         |                           |                  |                     |                               |                                          |              |                           |                                               |                            |              |                           |                                               |              |                           |                                               |            |              |                         |                                              |                            |             |                        |                                             |              |                         |                                              |                         |                                    |                                       |                                            |   |
|-------------------------------------------------------------------------------------------------|---------------------------------------------------------------------------------------------------------------------------------------------------------------------------------------------------------------------------------------------------------------------------------------------------------------------------------------------------------|----------------------------------------------------------------------------------------------------------------------------------------------------------------------------------------------------------------------------------------------------------------------------------------------------------------------------------------------------------------------------------------------------------------------------------------------------|-----------------------------------------------------------------------------------------------------------------------------------------------------------------------------------------------------------------------------------------------------------------------------------------------------------------------------------------------------------------------------------------------------------------------------------------------------------------------------------------------------------------------------------------------------------------------------------------------------------------------------------------------------------------------------------------------------------------------------------------------------------------------------------------------------------------------------------------------------------------------------------------------------------------------------------------------------------------------------------------------------------------------------------------------------------------------------------------------------------------------------------------------------------------------------------------------------------------------------------------------------------------------------------------------------------------------------------------------------------------------------------------------------------------------------------------------------------------------------------------------------------------------------------------------------------------------------------------------------------------------------------------------------------------------------------------------------------------------------------------------------------------------------------------------------------------------------------------------------------------------------------------------------------------------------------------------------|-----------------------------------|---------------------|-----------------------------------|--------------------------------------------|----------|-------------|------------|----------|------------------|-------------------------|----------|------------------|---------|---------------------------|------------------|---------------------|-------------------------------|------------------------------------------|--------------|---------------------------|-----------------------------------------------|----------------------------|--------------|---------------------------|-----------------------------------------------|--------------|---------------------------|-----------------------------------------------|------------|--------------|-------------------------|----------------------------------------------|----------------------------|-------------|------------------------|---------------------------------------------|--------------|-------------------------|----------------------------------------------|-------------------------|------------------------------------|---------------------------------------|--------------------------------------------|---|
| <b>PROBLEM</b><br>Is the problem a priority?                                                    | <input type="radio"/> No<br><input type="radio"/> Probably no<br><input type="radio"/> Probably yes<br><input checked="" type="radio"/> Yes<br>-----<br><input type="radio"/> Varies<br><input type="radio"/> Don't know                                                                                                                                | The strategy for mechanical ventilation is very important in patients with acute respiratory distress syndrome (ARDS), as well as the treatment of the primary disease. In particular, mechanical ventilation settings have the highest priority for patients with ARDS. To reduce further lung injury in patients with ARDS, studies have been conducted to determine the optimal ventilation strategy to limit tidal volume and airway pressure. |                                                                                                                                                                                                                                                                                                                                                                                                                                                                                                                                                                                                                                                                                                                                                                                                                                                                                                                                                                                                                                                                                                                                                                                                                                                                                                                                                                                                                                                                                                                                                                                                                                                                                                                                                                                                                                                                                                                                                     |                                   |                     |                                   |                                            |          |             |            |          |                  |                         |          |                  |         |                           |                  |                     |                               |                                          |              |                           |                                               |                            |              |                           |                                               |              |                           |                                               |            |              |                         |                                              |                            |             |                        |                                             |              |                         |                                              |                         |                                    |                                       |                                            |   |
| <b>BENEFITS &amp; HARMS OF THE OPTIONS</b>                                                      | What is the overall certainty of the evidence of effects?                                                                                                                                                                                                                                                                                               | <input type="radio"/> Very low<br><input type="radio"/> Low<br><input checked="" type="radio"/> Moderate<br><input type="radio"/> High<br>-----<br><input type="radio"/> No included studies                                                                                                                                                                                                                                                       | <p><b>The relative importance or values of the main outcomes of interest:</b></p> <table border="1"> <thead> <tr> <th>Outcome</th> <th>Relative importance</th> <th>Certainty of the evidence (GRADE)</th> </tr> </thead> <tbody> <tr> <td>Mortality (Short term)<sup>(note 1)</sup></td> <td>CRITICAL</td> <td>⊕⊕⊖⊖<br/>LOW</td> </tr> <tr> <td>barotrauma</td> <td>CRITICAL</td> <td>⊕⊖⊖⊖<br/>VERY LOW</td> </tr> <tr> <td>VFD<sup>(note 2)</sup></td> <td>CRITICAL</td> <td>⊕⊕⊕⊖<br/>MODERATE</td> </tr> </tbody> </table> <p><b>Summary of findings:</b></p> <table border="1"> <thead> <tr> <th>Outcome</th> <th>Conventional tidal volume</th> <th>Low tidal volume</th> <th>Difference (95% CI)</th> <th>Relative effect (RR) (95% CI)</th> </tr> </thead> <tbody> <tr> <td rowspan="3">Short-term mortality<sup>(note 1)</sup></td> <td>397 per 1000</td> <td>334 per 1000 (266 to 425)</td> <td>64 fewer per 1000 (from 28 more to 131 fewer)</td> <td rowspan="3"><b>RR 0.84</b> (0.67-1.07)</td> </tr> <tr> <td>380 per 1000</td> <td>319 per 1000 (255 to 407)</td> <td>61 fewer per 1000 (from 27 more to 125 fewer)</td> </tr> <tr> <td>560 per 1000</td> <td>470 per 1000 (375 to 599)</td> <td>90 fewer per 1000 (from 39 more to 185 fewer)</td> </tr> <tr> <td rowspan="3">Barotrauma</td> <td>114 per 1000</td> <td>93 per 1000 (55 to 160)</td> <td>20 fewer per 1000 (from 47 more to 59 fewer)</td> <td rowspan="3"><b>RR 0.82</b> (0.48-1.41)</td> </tr> <tr> <td>38 per 1000</td> <td>31 per 1000 (18 to 54)</td> <td>7 fewer per 1000 (from 16 more to 20 fewer)</td> </tr> <tr> <td>120 per 1000</td> <td>98 per 1000 (58 to 169)</td> <td>22 fewer per 1000 (from 49 more to 62 fewer)</td> </tr> <tr> <td>VFD<sup>(note 2)</sup></td> <td>The mean VFD at 28days was 10 days</td> <td>The mean VFD at 28days was 11.4. days</td> <td>MD 2.52 more (from 0.53 more to 4.51 more)</td> <td>-</td> </tr> </tbody> </table> | Outcome                           | Relative importance | Certainty of the evidence (GRADE) | Mortality (Short term) <sup>(note 1)</sup> | CRITICAL | ⊕⊕⊖⊖<br>LOW | barotrauma | CRITICAL | ⊕⊖⊖⊖<br>VERY LOW | VFD <sup>(note 2)</sup> | CRITICAL | ⊕⊕⊕⊖<br>MODERATE | Outcome | Conventional tidal volume | Low tidal volume | Difference (95% CI) | Relative effect (RR) (95% CI) | Short-term mortality <sup>(note 1)</sup> | 397 per 1000 | 334 per 1000 (266 to 425) | 64 fewer per 1000 (from 28 more to 131 fewer) | <b>RR 0.84</b> (0.67-1.07) | 380 per 1000 | 319 per 1000 (255 to 407) | 61 fewer per 1000 (from 27 more to 125 fewer) | 560 per 1000 | 470 per 1000 (375 to 599) | 90 fewer per 1000 (from 39 more to 185 fewer) | Barotrauma | 114 per 1000 | 93 per 1000 (55 to 160) | 20 fewer per 1000 (from 47 more to 59 fewer) | <b>RR 0.82</b> (0.48-1.41) | 38 per 1000 | 31 per 1000 (18 to 54) | 7 fewer per 1000 (from 16 more to 20 fewer) | 120 per 1000 | 98 per 1000 (58 to 169) | 22 fewer per 1000 (from 49 more to 62 fewer) | VFD <sup>(note 2)</sup> | The mean VFD at 28days was 10 days | The mean VFD at 28days was 11.4. days | MD 2.52 more (from 0.53 more to 4.51 more) | - |
|                                                                                                 | Outcome                                                                                                                                                                                                                                                                                                                                                 | Relative importance                                                                                                                                                                                                                                                                                                                                                                                                                                |                                                                                                                                                                                                                                                                                                                                                                                                                                                                                                                                                                                                                                                                                                                                                                                                                                                                                                                                                                                                                                                                                                                                                                                                                                                                                                                                                                                                                                                                                                                                                                                                                                                                                                                                                                                                                                                                                                                                                     | Certainty of the evidence (GRADE) |                     |                                   |                                            |          |             |            |          |                  |                         |          |                  |         |                           |                  |                     |                               |                                          |              |                           |                                               |                            |              |                           |                                               |              |                           |                                               |            |              |                         |                                              |                            |             |                        |                                             |              |                         |                                              |                         |                                    |                                       |                                            |   |
|                                                                                                 | Mortality (Short term) <sup>(note 1)</sup>                                                                                                                                                                                                                                                                                                              | CRITICAL                                                                                                                                                                                                                                                                                                                                                                                                                                           |                                                                                                                                                                                                                                                                                                                                                                                                                                                                                                                                                                                                                                                                                                                                                                                                                                                                                                                                                                                                                                                                                                                                                                                                                                                                                                                                                                                                                                                                                                                                                                                                                                                                                                                                                                                                                                                                                                                                                     | ⊕⊕⊖⊖<br>LOW                       |                     |                                   |                                            |          |             |            |          |                  |                         |          |                  |         |                           |                  |                     |                               |                                          |              |                           |                                               |                            |              |                           |                                               |              |                           |                                               |            |              |                         |                                              |                            |             |                        |                                             |              |                         |                                              |                         |                                    |                                       |                                            |   |
|                                                                                                 | barotrauma                                                                                                                                                                                                                                                                                                                                              | CRITICAL                                                                                                                                                                                                                                                                                                                                                                                                                                           |                                                                                                                                                                                                                                                                                                                                                                                                                                                                                                                                                                                                                                                                                                                                                                                                                                                                                                                                                                                                                                                                                                                                                                                                                                                                                                                                                                                                                                                                                                                                                                                                                                                                                                                                                                                                                                                                                                                                                     | ⊕⊖⊖⊖<br>VERY LOW                  |                     |                                   |                                            |          |             |            |          |                  |                         |          |                  |         |                           |                  |                     |                               |                                          |              |                           |                                               |                            |              |                           |                                               |              |                           |                                               |            |              |                         |                                              |                            |             |                        |                                             |              |                         |                                              |                         |                                    |                                       |                                            |   |
| VFD <sup>(note 2)</sup>                                                                         | CRITICAL                                                                                                                                                                                                                                                                                                                                                | ⊕⊕⊕⊖<br>MODERATE                                                                                                                                                                                                                                                                                                                                                                                                                                   |                                                                                                                                                                                                                                                                                                                                                                                                                                                                                                                                                                                                                                                                                                                                                                                                                                                                                                                                                                                                                                                                                                                                                                                                                                                                                                                                                                                                                                                                                                                                                                                                                                                                                                                                                                                                                                                                                                                                                     |                                   |                     |                                   |                                            |          |             |            |          |                  |                         |          |                  |         |                           |                  |                     |                               |                                          |              |                           |                                               |                            |              |                           |                                               |              |                           |                                               |            |              |                         |                                              |                            |             |                        |                                             |              |                         |                                              |                         |                                    |                                       |                                            |   |
| Outcome                                                                                         | Conventional tidal volume                                                                                                                                                                                                                                                                                                                               | Low tidal volume                                                                                                                                                                                                                                                                                                                                                                                                                                   | Difference (95% CI)                                                                                                                                                                                                                                                                                                                                                                                                                                                                                                                                                                                                                                                                                                                                                                                                                                                                                                                                                                                                                                                                                                                                                                                                                                                                                                                                                                                                                                                                                                                                                                                                                                                                                                                                                                                                                                                                                                                                 | Relative effect (RR) (95% CI)     |                     |                                   |                                            |          |             |            |          |                  |                         |          |                  |         |                           |                  |                     |                               |                                          |              |                           |                                               |                            |              |                           |                                               |              |                           |                                               |            |              |                         |                                              |                            |             |                        |                                             |              |                         |                                              |                         |                                    |                                       |                                            |   |
| Short-term mortality <sup>(note 1)</sup>                                                        | 397 per 1000                                                                                                                                                                                                                                                                                                                                            | 334 per 1000 (266 to 425)                                                                                                                                                                                                                                                                                                                                                                                                                          | 64 fewer per 1000 (from 28 more to 131 fewer)                                                                                                                                                                                                                                                                                                                                                                                                                                                                                                                                                                                                                                                                                                                                                                                                                                                                                                                                                                                                                                                                                                                                                                                                                                                                                                                                                                                                                                                                                                                                                                                                                                                                                                                                                                                                                                                                                                       | <b>RR 0.84</b> (0.67-1.07)        |                     |                                   |                                            |          |             |            |          |                  |                         |          |                  |         |                           |                  |                     |                               |                                          |              |                           |                                               |                            |              |                           |                                               |              |                           |                                               |            |              |                         |                                              |                            |             |                        |                                             |              |                         |                                              |                         |                                    |                                       |                                            |   |
|                                                                                                 | 380 per 1000                                                                                                                                                                                                                                                                                                                                            | 319 per 1000 (255 to 407)                                                                                                                                                                                                                                                                                                                                                                                                                          | 61 fewer per 1000 (from 27 more to 125 fewer)                                                                                                                                                                                                                                                                                                                                                                                                                                                                                                                                                                                                                                                                                                                                                                                                                                                                                                                                                                                                                                                                                                                                                                                                                                                                                                                                                                                                                                                                                                                                                                                                                                                                                                                                                                                                                                                                                                       |                                   |                     |                                   |                                            |          |             |            |          |                  |                         |          |                  |         |                           |                  |                     |                               |                                          |              |                           |                                               |                            |              |                           |                                               |              |                           |                                               |            |              |                         |                                              |                            |             |                        |                                             |              |                         |                                              |                         |                                    |                                       |                                            |   |
|                                                                                                 | 560 per 1000                                                                                                                                                                                                                                                                                                                                            | 470 per 1000 (375 to 599)                                                                                                                                                                                                                                                                                                                                                                                                                          | 90 fewer per 1000 (from 39 more to 185 fewer)                                                                                                                                                                                                                                                                                                                                                                                                                                                                                                                                                                                                                                                                                                                                                                                                                                                                                                                                                                                                                                                                                                                                                                                                                                                                                                                                                                                                                                                                                                                                                                                                                                                                                                                                                                                                                                                                                                       |                                   |                     |                                   |                                            |          |             |            |          |                  |                         |          |                  |         |                           |                  |                     |                               |                                          |              |                           |                                               |                            |              |                           |                                               |              |                           |                                               |            |              |                         |                                              |                            |             |                        |                                             |              |                         |                                              |                         |                                    |                                       |                                            |   |
| Barotrauma                                                                                      | 114 per 1000                                                                                                                                                                                                                                                                                                                                            | 93 per 1000 (55 to 160)                                                                                                                                                                                                                                                                                                                                                                                                                            | 20 fewer per 1000 (from 47 more to 59 fewer)                                                                                                                                                                                                                                                                                                                                                                                                                                                                                                                                                                                                                                                                                                                                                                                                                                                                                                                                                                                                                                                                                                                                                                                                                                                                                                                                                                                                                                                                                                                                                                                                                                                                                                                                                                                                                                                                                                        | <b>RR 0.82</b> (0.48-1.41)        |                     |                                   |                                            |          |             |            |          |                  |                         |          |                  |         |                           |                  |                     |                               |                                          |              |                           |                                               |                            |              |                           |                                               |              |                           |                                               |            |              |                         |                                              |                            |             |                        |                                             |              |                         |                                              |                         |                                    |                                       |                                            |   |
|                                                                                                 | 38 per 1000                                                                                                                                                                                                                                                                                                                                             | 31 per 1000 (18 to 54)                                                                                                                                                                                                                                                                                                                                                                                                                             | 7 fewer per 1000 (from 16 more to 20 fewer)                                                                                                                                                                                                                                                                                                                                                                                                                                                                                                                                                                                                                                                                                                                                                                                                                                                                                                                                                                                                                                                                                                                                                                                                                                                                                                                                                                                                                                                                                                                                                                                                                                                                                                                                                                                                                                                                                                         |                                   |                     |                                   |                                            |          |             |            |          |                  |                         |          |                  |         |                           |                  |                     |                               |                                          |              |                           |                                               |                            |              |                           |                                               |              |                           |                                               |            |              |                         |                                              |                            |             |                        |                                             |              |                         |                                              |                         |                                    |                                       |                                            |   |
|                                                                                                 | 120 per 1000                                                                                                                                                                                                                                                                                                                                            | 98 per 1000 (58 to 169)                                                                                                                                                                                                                                                                                                                                                                                                                            | 22 fewer per 1000 (from 49 more to 62 fewer)                                                                                                                                                                                                                                                                                                                                                                                                                                                                                                                                                                                                                                                                                                                                                                                                                                                                                                                                                                                                                                                                                                                                                                                                                                                                                                                                                                                                                                                                                                                                                                                                                                                                                                                                                                                                                                                                                                        |                                   |                     |                                   |                                            |          |             |            |          |                  |                         |          |                  |         |                           |                  |                     |                               |                                          |              |                           |                                               |                            |              |                           |                                               |              |                           |                                               |            |              |                         |                                              |                            |             |                        |                                             |              |                         |                                              |                         |                                    |                                       |                                            |   |
| VFD <sup>(note 2)</sup>                                                                         | The mean VFD at 28days was 10 days                                                                                                                                                                                                                                                                                                                      | The mean VFD at 28days was 11.4. days                                                                                                                                                                                                                                                                                                                                                                                                              | MD 2.52 more (from 0.53 more to 4.51 more)                                                                                                                                                                                                                                                                                                                                                                                                                                                                                                                                                                                                                                                                                                                                                                                                                                                                                                                                                                                                                                                                                                                                                                                                                                                                                                                                                                                                                                                                                                                                                                                                                                                                                                                                                                                                                                                                                                          | -                                 |                     |                                   |                                            |          |             |            |          |                  |                         |          |                  |         |                           |                  |                     |                               |                                          |              |                           |                                               |                            |              |                           |                                               |              |                           |                                               |            |              |                         |                                              |                            |             |                        |                                             |              |                         |                                              |                         |                                    |                                       |                                            |   |
| Is there important uncertainty about or variability in how much people value the main outcomes? | <input type="radio"/> Important uncertainty or variability<br><input type="radio"/> Possibly important uncertainty or variability<br><input checked="" type="radio"/> Possibly no important uncertainty or variability<br><input type="radio"/> No important uncertainty or variability<br>-----<br><input type="radio"/> No known undesirable outcomes |                                                                                                                                                                                                                                                                                                                                                                                                                                                    |                                                                                                                                                                                                                                                                                                                                                                                                                                                                                                                                                                                                                                                                                                                                                                                                                                                                                                                                                                                                                                                                                                                                                                                                                                                                                                                                                                                                                                                                                                                                                                                                                                                                                                                                                                                                                                                                                                                                                     |                                   |                     |                                   |                                            |          |             |            |          |                  |                         |          |                  |         |                           |                  |                     |                               |                                          |              |                           |                                               |                            |              |                           |                                               |              |                           |                                               |            |              |                         |                                              |                            |             |                        |                                             |              |                         |                                              |                         |                                    |                                       |                                            |   |
| How substantial are the desirable anticipated effects?                                          | <input type="radio"/> Trivial<br><input type="radio"/> Small<br><input checked="" type="radio"/> Moderate<br><input type="radio"/> Large<br>-----<br><input type="radio"/> Varies<br><input type="radio"/> Don't know                                                                                                                                   |                                                                                                                                                                                                                                                                                                                                                                                                                                                    | <p>The ventilation settings used in the low tidal volume and conventional tidal volume groups were from Amato1998: 6-12 mL/kg(actual body weight: ABW), Brochard1998: 6-10 v 10-15ml/kg (ABW), Stewart1998: 8 vs. 10-15ml/kg (predicted body weight: PBW), Brower 1999: 5-8 vs. 10-12ml/kg (PBW), ARDS netwok2000: 6 vs. 12ml/kg (PBW) and Villar 2006: 5 to 8 vs. 9 to 11 mL/kg (PBW), respectively with a range of 5 to 10 mL/kg in the low tidal volume groups. However, the actual ventilation was approximately 6.2 to 7.1 mL/kg in the low tidal volume group and approximately 10 to 11.8 mL/kg in the conventional tidal volume group</p> <p>Although a low tidal volume can cause hypercapnia, it can be overcome to some extent by increasing the ventilator rate.</p> <p>In general, patients on mechanical ventilation require sedative or analgesic agents to improve patient-ventilator synchronization and to reduce discomfort during ventilator wearing, but the dosage of sedatives or analgesics during low tidal volume ventilation are not increased.<sup>1)</sup></p>                                                                                                                                                                                                                                                                                                                                                                                                                                                                                                                                                                                                                                                                                                                                                                                                                                                         |                                   |                     |                                   |                                            |          |             |            |          |                  |                         |          |                  |         |                           |                  |                     |                               |                                          |              |                           |                                               |                            |              |                           |                                               |              |                           |                                               |            |              |                         |                                              |                            |             |                        |                                             |              |                         |                                              |                         |                                    |                                       |                                            |   |
| How substantial are the undesirable anticipated effects?                                        | <input type="radio"/> Large<br><input type="radio"/> Moderate<br><input checked="" type="radio"/> Small<br><input type="radio"/> Trivial<br>-----<br><input type="radio"/> Varies<br><input type="radio"/> Don't know                                                                                                                                   |                                                                                                                                                                                                                                                                                                                                                                                                                                                    |                                                                                                                                                                                                                                                                                                                                                                                                                                                                                                                                                                                                                                                                                                                                                                                                                                                                                                                                                                                                                                                                                                                                                                                                                                                                                                                                                                                                                                                                                                                                                                                                                                                                                                                                                                                                                                                                                                                                                     |                                   |                     |                                   |                                            |          |             |            |          |                  |                         |          |                  |         |                           |                  |                     |                               |                                          |              |                           |                                               |                            |              |                           |                                               |              |                           |                                               |            |              |                         |                                              |                            |             |                        |                                             |              |                         |                                              |                         |                                    |                                       |                                            |   |

**CQ03 : Should low tidal volume be used in adult patients with ARDS?**

PATIENTS: ADULT PATIENTS WITH ARDS

INTERVENTION: LOW TIDAL VOLUME

| CRITERIA     |                                                                                                        | JUDGEMENTS                                                                                                                                                                                                                                                                                                                                                                                        | RESERCH EVIDENCE                                                                                                                                                                                                                                                                                                                                                                                                                                                                                                                   | ADDITIONAL CONSIDERRATIONS |
|--------------|--------------------------------------------------------------------------------------------------------|---------------------------------------------------------------------------------------------------------------------------------------------------------------------------------------------------------------------------------------------------------------------------------------------------------------------------------------------------------------------------------------------------|------------------------------------------------------------------------------------------------------------------------------------------------------------------------------------------------------------------------------------------------------------------------------------------------------------------------------------------------------------------------------------------------------------------------------------------------------------------------------------------------------------------------------------|----------------------------|
|              | Does the balance between desirable effects and undesirable effects favor the option or the comparison? | <input type="radio"/> Favors the intervention<br><input checked="" type="radio"/> Probably Favors the intervention<br><input type="radio"/> Do not know<br><input type="radio"/> Probably Favors the comparison<br><input type="radio"/> Favors the comparison<br>-----<br><input type="radio"/> Varies                                                                                           | <b>Summary:</b><br>Although the number of deaths in patients with ARDS tends to be lower with low tidal volume than with conventional tidal volume, the difference is insignificant (RR 0.84, 95%CI 0.67-1.07). There is no significant decrease in the incidence of barotrauma in the low tidal volume group (RR0.82, 95%CI 0.48-1.41). The mean ventilator free days (VFD) were significantly greater (mean difference 2.52 days [95%CI 0.53-4.51]) in patients with lower tidal volume compared with conventional tidal volume. |                            |
| RESOURCE USE | How large are the resource requirements (costs)?                                                       | <input type="radio"/> Favors the comparison<br><input type="radio"/> Probably favors the comparison<br><input type="radio"/> Does not favor either the intervention or the comparison<br><input checked="" type="radio"/> Probably favors the intervention<br><input type="radio"/> Favors the intervention<br>-----<br><input type="radio"/> Varies<br><input type="radio"/> Don't know          | Changes in ventilator settings can be applied for all patients by adjusting the settings panel, without any additional resources.                                                                                                                                                                                                                                                                                                                                                                                                  |                            |
|              | Does the cost effectiveness of the option favor the option or the comparison?                          | <input type="radio"/> Large costs<br><input type="radio"/> Moderate costs<br><input type="radio"/> Negligible costs and savings<br><input type="radio"/> Moderate savings<br><input checked="" type="radio"/> Large savings<br>-----<br><input type="radio"/> Varies<br><input type="radio"/> Don't know                                                                                          | Since no new resources are required, there is no increase in cost.                                                                                                                                                                                                                                                                                                                                                                                                                                                                 |                            |
| EQUITY       | What would be the impact on health equity?                                                             | <input type="radio"/> Favors the comparison<br><input type="radio"/> Probably favors the comparison<br><input type="radio"/> Does not favor either the intervention or the comparison<br><input type="radio"/> Probably favors the intervention<br><input checked="" type="radio"/> Favors the intervention<br>-----<br><input type="radio"/> Varies<br><input type="radio"/> No included studies | This treatment can be provided in any institution where mechanical ventilators are available. Thus, all patients will be able to receive equal treatment.                                                                                                                                                                                                                                                                                                                                                                          |                            |

**CQ03 : Should low tidal volume be used in adult patients with ARDS?**

PATIENTS: ADULT PATIENTS WITH ARDS

INTERVENTION: LOW TIDAL VOLUME

| CRITERIA      |                                               | JUDGEMENTS                                                                                                                                                                                                                                                                                 | RESERCH EVIDENCE                                                                     | ADDITIONAL CONSIDERRATIONS |
|---------------|-----------------------------------------------|--------------------------------------------------------------------------------------------------------------------------------------------------------------------------------------------------------------------------------------------------------------------------------------------|--------------------------------------------------------------------------------------|----------------------------|
| ACCEPTABILITY | Is the option acceptable to key stakeholders? | <input checked="" type="radio"/> Reduced<br><input type="radio"/> Probably reduced<br><input type="radio"/> Probably no impact<br><input type="radio"/> Probably increased<br><input type="radio"/> Increased<br>-----<br><input type="radio"/> Varies<br><input type="radio"/> Don't know |                                                                                      |                            |
| FEASIBILITY   | Is the option feasible to implement?          | <input type="radio"/> No<br><input type="radio"/> Probably no<br><input checked="" type="radio"/> Probably yes<br><input type="radio"/> Yes<br>-----<br><input type="radio"/> Varies<br><input type="radio"/> Don't know                                                                   | The widespread adoption of this ventilation strategy seems to be an achievable goal. |                            |

## Recommendation

### CQ03 : Should low tidal volume be used in adult patients with ARDS?

| Balance of consequences | Undesirable consequences <i>clearly outweigh</i> desirable consequences in most settings | Undesirable consequences <i>probably outweigh</i> desirable consequences in most settings | The balance between desirable and undesirable consequences is <i>closely balanced or uncertain</i> | Desirable consequences <i>probably outweigh</i> undesirable consequences in most settings | Desirable consequences <i>clearly outweigh</i> undesirable consequences in most settings |
|-------------------------|------------------------------------------------------------------------------------------|-------------------------------------------------------------------------------------------|----------------------------------------------------------------------------------------------------|-------------------------------------------------------------------------------------------|------------------------------------------------------------------------------------------|
| Judgement               | ○                                                                                        | ○                                                                                         | ○                                                                                                  | ●                                                                                         | ○                                                                                        |

| Type of recommendation | Strong recommendation against the intervention | Conditional recommendation against the intervention | Conditional recommendation for either the intervention or the comparison | Conditional recommendation for the intervention |
|------------------------|------------------------------------------------|-----------------------------------------------------|--------------------------------------------------------------------------|-------------------------------------------------|
| Judgement              | ○                                              | ○                                                   | ○                                                                        | ●                                               |

|                       |                                                                                                                                                                                                                                                                                                                                                                                                                                                                                                                                                                                                                                                                                                                                                                                                                                                                                                                                                                                                                                                                                                                                                                                                                                                                                                                                                                                                                                                                                                                                                                                                                                                                                                                                                                                                                                                                                                                                                                                                                                                                                                                                                                                                                                                                                                                                                                                                                                                                                                                                                                                                                                                                                                                                                                                                                                                                                                                                                                                                                                                                                                                                                                                                                                                                                                                                                                                                                                                                                                                                                                                                                               |
|-----------------------|-------------------------------------------------------------------------------------------------------------------------------------------------------------------------------------------------------------------------------------------------------------------------------------------------------------------------------------------------------------------------------------------------------------------------------------------------------------------------------------------------------------------------------------------------------------------------------------------------------------------------------------------------------------------------------------------------------------------------------------------------------------------------------------------------------------------------------------------------------------------------------------------------------------------------------------------------------------------------------------------------------------------------------------------------------------------------------------------------------------------------------------------------------------------------------------------------------------------------------------------------------------------------------------------------------------------------------------------------------------------------------------------------------------------------------------------------------------------------------------------------------------------------------------------------------------------------------------------------------------------------------------------------------------------------------------------------------------------------------------------------------------------------------------------------------------------------------------------------------------------------------------------------------------------------------------------------------------------------------------------------------------------------------------------------------------------------------------------------------------------------------------------------------------------------------------------------------------------------------------------------------------------------------------------------------------------------------------------------------------------------------------------------------------------------------------------------------------------------------------------------------------------------------------------------------------------------------------------------------------------------------------------------------------------------------------------------------------------------------------------------------------------------------------------------------------------------------------------------------------------------------------------------------------------------------------------------------------------------------------------------------------------------------------------------------------------------------------------------------------------------------------------------------------------------------------------------------------------------------------------------------------------------------------------------------------------------------------------------------------------------------------------------------------------------------------------------------------------------------------------------------------------------------------------------------------------------------------------------------------------------------|
| <b>Recommendation</b> | <p><b>We recommend the use of low tidal volume at 6-8 mL/kg (predicted body weight: PBW) in adult patients with ARDS. (GRADE 1B, Strength of recommendation “strong recommendation” / Quality of evidence “moderate”)</b></p>                                                                                                                                                                                                                                                                                                                                                                                                                                                                                                                                                                                                                                                                                                                                                                                                                                                                                                                                                                                                                                                                                                                                                                                                                                                                                                                                                                                                                                                                                                                                                                                                                                                                                                                                                                                                                                                                                                                                                                                                                                                                                                                                                                                                                                                                                                                                                                                                                                                                                                                                                                                                                                                                                                                                                                                                                                                                                                                                                                                                                                                                                                                                                                                                                                                                                                                                                                                                 |
| <b>Justification</b>  | <p><b>Question:</b> Should low tidal volume be used in adult patients with ARDS?<br/> <b>Patients:</b> Adult patients with ARDS<br/> <b>Interventions:</b> low tidal volume (approximately 6-8 mL/kg PBW)<br/> <b>Comparison:</b> conventional tidal volume (approximately 10-12 mL/kg PBW)<br/> <b>Outcomes:</b> Short term mortality *1, barotrauma, Ventilator-free days (VFD) *2</p> <p><b>Summary of the evidence:</b><br/> Based on this systematic review, a total of six randomized controlled trials (RCTs) qualified for inclusion where a lung protective ventilation strategy with low tidal volume was studied in adult patients with ARDS. These six RCTs were also analyzed by Petrucci et al. in 2013 and no new RCT has been published since then. Although the duration of follow-up was different, all six RCTs (n=1,305) demonstrated a non-significant decrease in mortality in the low tidal volume group compared with the conventional tidal volume group (RR0.84, 95%CI 0.67-1.07). The occurrence of barotrauma (pneumothorax secondary to elevated airway pressure) was analyzed in all six RCTs, and there was no significant difference between the two groups (RR0.82, 95%CI 0.48-1.41). Ventilator Free Days (VFD) was analyzed in only three RCTs and VFD was significantly longer (median, 2.52 more days) in the low tidal volume group than in the conventional tidal volume group (95%CI 0.53 to 4.51)</p> <p><b>Quality of the evidence:</b><br/> The certainty of evidence regarding mortality decreased by two levels and was rated “low” for three reasons. First, there was a difference in the length of follow-up regarding mortality (28-day, 60-day, and hospital) among the RCTs. Second, there was heterogeneity of the cohorts among the RCTs (<math>I^2=50\%</math>). Third, the confidence interval was wide. For barotrauma, the certainty of evidence was rated “very low”. For VFD, the certainty of evidence was rated “moderate”. Overall, the quality of evidence was rated “moderate” since a lung protective ventilation strategy had a non-significant, but positive impact on all outcomes.</p> <p><b>Judgement of benefit and harm, resources and cost:</b><br/> A change in tidal volume settings with mechanical ventilation can be applied to all patients undergoing mechanical ventilation and requires no new resources or additional costs. The use of low tidal volume increases VFD significantly with a tendency to decrease mortality and barotrauma. Although this strategy may induce hypercarbia or respiratory acidosis as a potential complication, benefits will outweigh the potential risks.</p> <p><b>Recommendations:</b><br/> We recommend the use of low tidal volume at 6-8 mL/kg (predicted body weight: PBW) in adult patients with ARDS. (GRADE 1B, Strength of recommendation “strong recommendation” / Quality of evidence “moderate”)</p> <p><b>Supplementary conditions:</b><br/> Tidal volume is calculated based on PBW {Male:<math>50+0.91 \times [\text{Height (cm)} - 152.4]</math>, Female:<math>45.5+0.9 \times [\text{Height (cm)} - 152.4]</math>} rather than actual body weight. When a lung protective ventilation strategy is applied, a tidal volume equal to or less than 10mL/kg PBW is considered beneficial. However, the optimal tidal volume still remains to be determined. Of the RCTs analyzed in this review, the actual tidal volume delivered in the lung protective strategy group was 6.2-7.6 mL/kg. Therefore, we recommend a tidal volume of 6-8 mL/kg PBW. In case of an excessive spontaneous</p> |

|                                                 |                                                                                                                                                                                                                                                                                                                                                                                                                                                                                                                                                                           |
|-------------------------------------------------|---------------------------------------------------------------------------------------------------------------------------------------------------------------------------------------------------------------------------------------------------------------------------------------------------------------------------------------------------------------------------------------------------------------------------------------------------------------------------------------------------------------------------------------------------------------------------|
|                                                 | breathing effort, the actual tidal volume may sometimes exceed the targeted tidal volume. To prevent this, respiratory parameters such as driving pressure or trans-pulmonary pressure may need to be used as monitoring tools to determine an appropriate tidal volume.                                                                                                                                                                                                                                                                                                  |
| <b>Subgroup considerations</b>                  | When patients with ARDS have been on conventional tidal volume (10 mL/kg or greater PBW) for more than a week, the efficacy of introducing a low tidal volume still remains to be determined.                                                                                                                                                                                                                                                                                                                                                                             |
| <b>Implementation considerations</b>            | A low tidal volume (compared to a conventional tidal volume) will decrease the minute ventilation, and as a result, hypercarbia or respiratory acidosis may pursue. However, these incidences will be reversed by increasing the set respiratory rate.                                                                                                                                                                                                                                                                                                                    |
| <b>Monitoring and evaluation considerations</b> | Monitoring of respiratory parameters (arterial oxygen or carbon dioxide levels, airway pressure etc.) is required to assess adequate arterial oxygenation and ventilation.                                                                                                                                                                                                                                                                                                                                                                                                |
| <b>Research priorities</b>                      | Since a lung protective strategy has been accepted as the global standard ventilation technique in patients with ARDS, a new RCT to compare the efficacy of a low tidal volume strategy with a conventional tidal volume strategy has not been conducted since 2006. However, the ideal tidal volume still remains to be determined (e.g. 6mL/kg vs. 8mL/kg PBW), and thus, further studies are required. Another future research interest may focus on driving pressure or transpulmonary pressure as potential ideal markers for lung protective low-tidal ventilation. |

Note 1) Mortality at the end of the study. For the study by ARDS Network in 2000, a survival curve was used to determine short term mortality at 28-days and the number was used.

Note 2) VFD means the number of days free from mechanical ventilation for the initial 28 days. If the patient expired within 28 days, VFD was counted as a zero.

#### References

1. Kahn JM, Andersson L, Karir V, et al. Low tidal volume ventilation does not increase sedation use in patients with acute lung injury. *Critical care medicine* **33**(4): 766-71, 2005. PMID 15818103
2. Petrucci N, De Feo C. Lung protective ventilation strategy for the acute respiratory distress syndrome. *Cochrane database of systematic reviews* **2**: CD003844, 2013. PMID 23450544

## CQ04. Study flow diagram

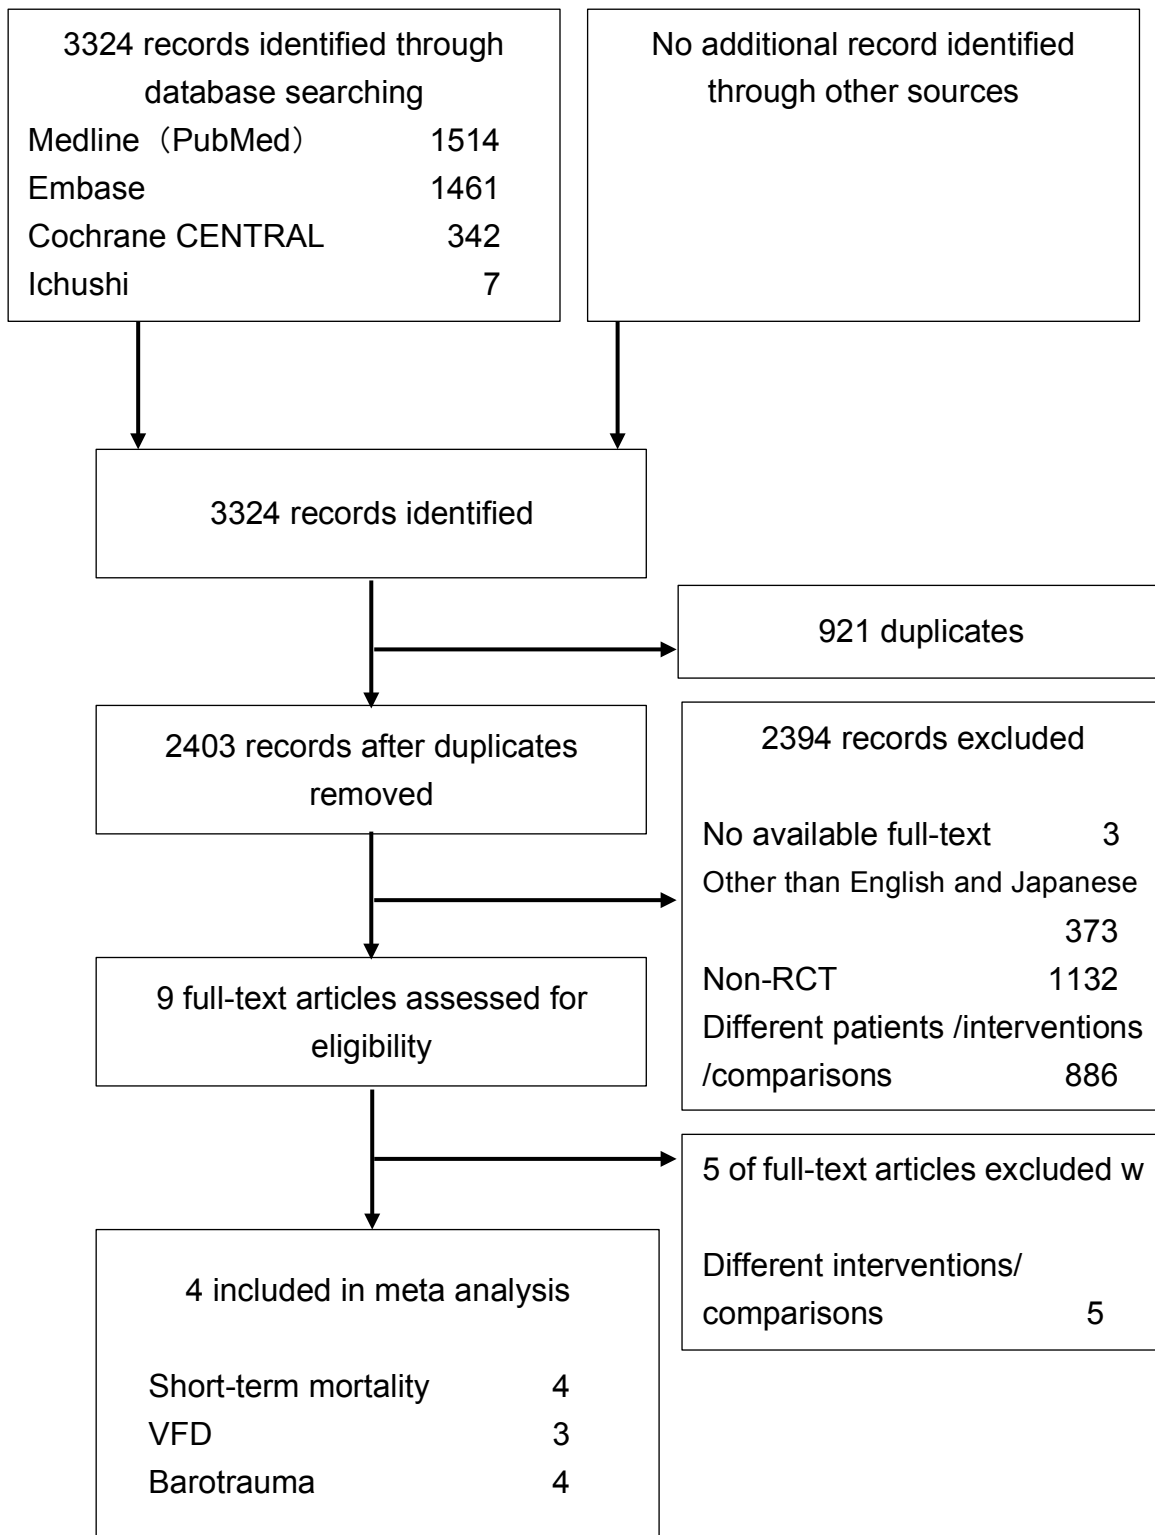

| Outcome |                            | Short term mortality                      |                                    | risk of bias                              |                                                                                                                             | serious (-1)                                                                  |                                              |                                                                      |                                                                   |
|---------|----------------------------|-------------------------------------------|------------------------------------|-------------------------------------------|-----------------------------------------------------------------------------------------------------------------------------|-------------------------------------------------------------------------------|----------------------------------------------|----------------------------------------------------------------------|-------------------------------------------------------------------|
| 番号      | 著者名 発表年<br>(Forest plot表示) | risk of bias評価                            |                                    |                                           |                                                                                                                             |                                                                               |                                              |                                                                      |                                                                   |
|         |                            | ランダム割付順序の生成<br>random sequence generation | 割り付けの隠蔽化<br>allocation concealment | ブラインド<br>blinding                         |                                                                                                                             | 不完全なアウトカムデータ<br>incomplete outcome data                                       | 選択されたアウトカムの報告<br>selective outcome reporting | その他のバイアス<br>Other sources of bias                                    | 研究内でのバイアスのリスク<br>Risk of bias within a study                      |
|         |                            |                                           |                                    | 研究参加者と治療提供者<br>participants and personnel | アウトカム評価者<br>outcome assessors                                                                                               |                                                                               |                                              |                                                                      |                                                                   |
| 1       | Brochard 1998              | Low risk                                  | Low risk                           | High risk                                 | Unclear risk                                                                                                                | Low risk                                                                      | Unclear risk                                 | Low risk                                                             | Unclear risk                                                      |
| 2       | Brower 1999                | Unclear risk                              | Low risk                           | High risk                                 | Unclear risk                                                                                                                | Low risk                                                                      | Unclear risk                                 | Low risk                                                             | Unclear risk                                                      |
| 3       | ARDS network 2000          | Unclear risk                              | Low risk                           | High risk                                 | Unclear risk                                                                                                                | Low risk                                                                      | Low risk                                     | Low risk                                                             | Unclear risk                                                      |
| 4       | Villar 2006                | Low risk                                  | Low risk                           | High risk                                 | Unclear risk                                                                                                                | Low risk                                                                      | Unclear risk                                 | Low risk                                                             | Unclear risk                                                      |
|         |                            |                                           |                                    |                                           |                                                                                                                             |                                                                               |                                              |                                                                      |                                                                   |
| 番号      | 著者名 発表年<br>(Forest plot表示) | risk of biasコメント                          |                                    |                                           |                                                                                                                             |                                                                               |                                              |                                                                      |                                                                   |
| 1       | Brochard 1998              | 封筒法であるが乱数表を使用している                         | 封筒法であるが隠蔽化されている                    | 一回換気量・プラトー庄の違いを盲検化することは不可能                | Blindに関しては不明だが、結果の評価についてバイアスが生じる可能性は低い                                                                                      | 100%フォローされた                                                                   | protocolを参照できない                              | ただし中間解析で両群に有意差なく早期中止されている                                            | blind化に関してbiasが大きい<br>が、その他の項目ではlow riskが多いことから、全体的にはunclearとなった。 |
| 2       | Brower 1999                | 乱数表を使ったか否かの説明なし                           | 隠蔽化されている                           | 一回換気量・プラトー庄の違いを盲検化することは不可能                | 記載はないが、all members of the study team and clinical staffsがマスクされているとの記載あり、同様にout comeの評価者もマスクされていると判断、統計解析する人がマスクされているかの記載はなし | 100%フォローされた                                                                   | protocolを参照できない                              | intension-to-treat解析の記載はないが、その他のbiasはなし<br>ただし、中間解析に基づき、研究が早期中止されている | blind化に関してbiasが大きい<br>が、その他の項目ではlow riskが多いことから、全体的にはunclearとなった。 |
| 3       | ARDS network 2000          | 乱数表を使ったか否かの説明なし                           | 隠蔽化されている                           | 一回換気量・プラトー庄の違いを盲検化することは不可能                | Blindに関しては不明だが、結果の評価についてバイアスが生じる可能性は低い                                                                                      | 100%フォローされた                                                                   | 100%報告された                                    | ただし、中間解析に基づき、研究が早期中止されている                                            | blind化に関してbiasが大きい<br>が、その他の項目ではlow riskが多いことから、全体的にはunclearとなった。 |
| 4       | Villar 2006                | 封筒法であるが乱数表を使用している                         | 封筒法であるが隠蔽化されている                    | 一回換気量・プラトー庄の違いを盲検化することは不可能                | Blindに関しては不明だが、結果の評価についてバイアスが生じる可能性は低い                                                                                      | 100%フォローされた。しかしランダム化に問題ありとして8人が除外された。mortalityに関しては全数が報告されていたので、除外前のデータを採用した。 | 100%報告されたと思われるが、protocolを参照できない              | ただし、中間解析に基づき、研究が早期中止されている                                            | blind化に関してbiasが大きい<br>が、その他の項目ではlow riskが多いことから、全体的にはunclearとなった。 |



| Outcome |                            | VFD                                       |                                    | risk of bias                              |                                                                                                                             | serious (-1)                            |                                              |                                                                      |                                                                               |
|---------|----------------------------|-------------------------------------------|------------------------------------|-------------------------------------------|-----------------------------------------------------------------------------------------------------------------------------|-----------------------------------------|----------------------------------------------|----------------------------------------------------------------------|-------------------------------------------------------------------------------|
| 番号      | 著者名 発表年<br>(Forest plot表示) | risk of bias評価                            |                                    |                                           |                                                                                                                             |                                         |                                              |                                                                      |                                                                               |
|         |                            | ランダム割付順序の生成<br>random sequence generation | 割り付けの隠蔽化<br>allocation concealment | ブラインド<br>blinding                         |                                                                                                                             | 不完全なアウトカムデータ<br>incomplete outcome data | 選択されたアウトカムの報告<br>selective outcome reporting | その他のバイアス<br>Other sources of bias                                    | 研究内でのバイアスのリスク<br>Risk of bias within a study                                  |
|         |                            |                                           |                                    | 研究参加者と治療提供者<br>participants and personnel | アウトカム評価者<br>outcome assessors                                                                                               |                                         |                                              |                                                                      |                                                                               |
| 1       | Brower 1999                | Unclear risk                              | Low risk                           | High risk                                 | Unclear risk                                                                                                                | Low risk                                | Unclear risk                                 | Low risk                                                             | Unclear risk                                                                  |
| 2       | ARDS network 2000          | Unclear risk                              | Low risk                           | High risk                                 | Unclear risk                                                                                                                | Low risk                                | Low risk                                     | Low risk                                                             | Unclear risk                                                                  |
| 3       | Villar 2006                | Low risk                                  | Low risk                           | High risk                                 | Unclear risk                                                                                                                | High risk                               | Unclear risk                                 | Low risk                                                             | High risk                                                                     |
| 4       |                            | Unclear risk                              | Unclear risk                       | Unclear risk                              | Unclear risk                                                                                                                | Unclear risk                            | Unclear risk                                 | Unclear risk                                                         | Unclear risk                                                                  |
| 5       |                            | Unclear risk                              | Unclear risk                       | Unclear risk                              | Unclear risk                                                                                                                | Unclear risk                            | Unclear risk                                 | Unclear risk                                                         | Unclear risk                                                                  |
| 6       |                            | Unclear risk                              | Unclear risk                       | Unclear risk                              | Unclear risk                                                                                                                | Unclear risk                            | Unclear risk                                 | Unclear risk                                                         | Unclear risk                                                                  |
| 7       |                            | Unclear risk                              | Unclear risk                       | Unclear risk                              | Unclear risk                                                                                                                | Unclear risk                            | Unclear risk                                 | Unclear risk                                                         | Unclear risk                                                                  |
| 8       |                            | Unclear risk                              | Unclear risk                       | Unclear risk                              | Unclear risk                                                                                                                | Unclear risk                            | Unclear risk                                 | Unclear risk                                                         | Unclear risk                                                                  |
| 9       |                            | Unclear risk                              | Unclear risk                       | Unclear risk                              | Unclear risk                                                                                                                | Unclear risk                            | Unclear risk                                 | Unclear risk                                                         | Unclear risk                                                                  |
| 10      |                            | Unclear risk                              | Unclear risk                       | Unclear risk                              | Unclear risk                                                                                                                | Unclear risk                            | Unclear risk                                 | Unclear risk                                                         | Unclear risk                                                                  |
|         |                            |                                           |                                    |                                           |                                                                                                                             |                                         |                                              |                                                                      |                                                                               |
| 番号      | 著者名 発表年<br>(Forest plot表示) | risk of biasコメント                          |                                    |                                           |                                                                                                                             |                                         |                                              |                                                                      |                                                                               |
| 1       | Brower 1999                | 乱数表を使ったか否かの説明なし                           | 隠蔽化されている                           | 一回換気量・プラトー圧の違いを盲検化することは不可能                | 記載はないが、all members of the study team and clinical staffsがマスクされているとの記載あり、同様にout comeの評価者もマスクされていると判断、統計解析する人がマスクされているかの記載はなし | 100%フォローされた                             | protocolを参照できない                              | intension-to-treat解析の記載はないが、その他のbiasはなし<br>ただし、中間解析に基づき、研究が早期中止されている | blind化に関してbiasが大きい<br>が、その他の項目ではlow riskが多いことから、全体的にはunclearとなった。             |
| 2       | ARDS network 2000          | 乱数表を使ったか否かの説明なし                           | 隠蔽化されている                           | 一回換気量・プラトー圧の違いを盲検化することは不可能                | Blindに関しては不明だが、結果の評価についてバイアスが生じる可能性は低い                                                                                      | 100%フォローされた                             | 100%報告された                                    | ただし、中間解析に基づき、研究が早期中止されている                                            | blind化に関してbiasが大きい<br>が、その他の項目ではlow riskが多いことから、全体的にはunclearとなった。             |
| 3       | Villar 2006                | 封筒法であるが乱数表を使用している                         | 封筒法であるが隠蔽化されている                    | 一回換気量・プラトー圧の違いを盲検化することは不可能                | Blindに関しては不明だが、結果の評価についてバイアスが生じる可能性は低い                                                                                      | 8人がランダム化に問題があったとして除外されている。              | 100%報告されたと思われるが、protocolを参照できない              | ただし、中間解析に基づき、研究が早期中止されている                                            | blind化に関してbiasが大き<br>く、このアウトカムに対してはランダム化にも問題を抱えているために、全体としてhigh riskであると判断した。 |

| Outcome |                            | Barotrauma                                |                                    | risk of bias                              |                                                                                                                            | serious (-1)                            |                                              |                                                                      |                                                                            |
|---------|----------------------------|-------------------------------------------|------------------------------------|-------------------------------------------|----------------------------------------------------------------------------------------------------------------------------|-----------------------------------------|----------------------------------------------|----------------------------------------------------------------------|----------------------------------------------------------------------------|
| 番号      | 著者名 発表年<br>(Forest plot表示) | risk of bias評価                            |                                    |                                           |                                                                                                                            |                                         |                                              |                                                                      |                                                                            |
|         |                            | ランダム割付順序の生成<br>random sequence generation | 割り付けの隠蔽化<br>allocation concealment | ブラインド<br>blinding                         |                                                                                                                            | 不完全なアウトカムデータ<br>incomplete outcome data | 選択されたアウトカムの報告<br>selective outcome reporting | その他のバイアス<br>Other sources of bias                                    | 研究内でのバイアスのリスク<br>Risk of bias within a study                               |
|         |                            |                                           |                                    | 研究参加者と治療提供者<br>participants and personnel | アウトカム評価者<br>outcome assessors                                                                                              |                                         |                                              |                                                                      |                                                                            |
| 1       | Brochard 1998              | Low risk                                  | Low risk                           | High risk                                 | Unclear risk                                                                                                               | Low risk                                | Unclear risk                                 | Low risk                                                             | Unclear risk                                                               |
| 2       | Brower 1999                | Unclear risk                              | Low risk                           | High risk                                 | Unclear risk                                                                                                               | Low risk                                | Unclear risk                                 | Low risk                                                             | Unclear risk                                                               |
| 3       | ARDS network 2000          | Unclear risk                              | Low risk                           | High risk                                 | Unclear risk                                                                                                               | Low risk                                | Low risk                                     | Low risk                                                             | Unclear risk                                                               |
| 4       | Villar 2006                | Low risk                                  | Low risk                           | High risk                                 | Unclear risk                                                                                                               | High risk                               | Unclear risk                                 | Low risk                                                             | High risk                                                                  |
| 5       |                            | Unclear risk                              | Unclear risk                       | Unclear risk                              | Unclear risk                                                                                                               | Unclear risk                            | Unclear risk                                 | Unclear risk                                                         | Unclear risk                                                               |
| 6       |                            | Unclear risk                              | Unclear risk                       | Unclear risk                              | Unclear risk                                                                                                               | Unclear risk                            | Unclear risk                                 | Unclear risk                                                         | Unclear risk                                                               |
| 7       |                            | Unclear risk                              | Unclear risk                       | Unclear risk                              | Unclear risk                                                                                                               | Unclear risk                            | Unclear risk                                 | Unclear risk                                                         | Unclear risk                                                               |
| 8       |                            | Unclear risk                              | Unclear risk                       | Unclear risk                              | Unclear risk                                                                                                               | Unclear risk                            | Unclear risk                                 | Unclear risk                                                         | Unclear risk                                                               |
| 9       |                            | Unclear risk                              | Unclear risk                       | Unclear risk                              | Unclear risk                                                                                                               | Unclear risk                            | Unclear risk                                 | Unclear risk                                                         | Unclear risk                                                               |
| 10      |                            | Unclear risk                              | Unclear risk                       | Unclear risk                              | Unclear risk                                                                                                               | Unclear risk                            | Unclear risk                                 | Unclear risk                                                         | Unclear risk                                                               |
|         |                            |                                           |                                    |                                           |                                                                                                                            |                                         |                                              |                                                                      |                                                                            |
| 番号      | 著者名 発表年<br>(Forest plot表示) | risk of biasコメント                          |                                    |                                           |                                                                                                                            |                                         |                                              |                                                                      |                                                                            |
| 1       | Brochard 1998              | 封筒法であるが乱数表を使用している                         | 封筒法であるが隠蔽化されている                    | 一回換気量・プラトー圧の違いを盲検化することは不可能                | Blindに関しては不明だが、結果の評価についてバイアスが生じる可能性は低い                                                                                     | 100%フォローされた                             | protocolを参照できない                              | ただし中間解析で両群に有意差なく早期中止されている                                            | blind化に関してbiasが大きいですが、その他の項目ではlow riskが多いことから、全体的にはunclearとなった。            |
| 2       | Brower 1999                | 乱数表を使ったか否かの説明なし                           | 隠蔽化されている                           | 一回換気量・プラトー圧の違いを盲検化することは不可能                | 記載はないが、all members of the study team and clinical staffsがマスクされているとの記載あり、同様にoutcomeの評価者もマスクされていると判断、統計解析する人がマスクされているかの記載はなし | 100%フォローされた                             | protocolを参照できない                              | intension-to-treat解析の記載はないが、その他のbiasはなし<br>ただし、中間解析に基づき、研究が早期中止されている | blind化に関してbiasが大きいですが、その他の項目ではlow riskが多いことから、全体的にはunclearとなった。            |
| 3       | ARDS network 2000          | 乱数表を使ったか否かの説明なし                           | 隠蔽化されている                           | 一回換気量・プラトー圧の違いを盲検化することは不可能                | Blindに関しては不明だが、結果の評価についてバイアスが生じる可能性は低い                                                                                     | 100%フォローされた                             | 100%報告された                                    | ただし、中間解析に基づき、研究が早期中止されている                                            | blind化に関してbiasが大きいですが、その他の項目ではlow riskが多いことから、全体的にはunclearとなった。            |
| 4       | Villar 2006                | 封筒法であるが乱数表を使用している                         | 封筒法であるが隠蔽化されている                    | 一回換気量・プラトー圧の違いを盲検化することは不可能                | Blindに関しては不明だが、結果の評価についてバイアスが生じる可能性は低い                                                                                     | 8人がランダム化に問題があったとして除外されている。              | 100%報告されたと思われるが、protocolを参照できない              | ただし、中間解析に基づき、研究が早期中止されている                                            | blind化に関してbiasが大きいく、このアウトカムに対してはランダム化にも問題を抱えているために、全体としてhigh riskであると判断した。 |

## Short term mortality

|                   | Random sequence generation (selection bias) | Allocation concealment (selection bias) | Blinding of participants and personnel (performance bias) | Blinding of outcome assessment (detection bias) | Incomplete outcome data (attrition bias) | Selective reporting (reporting bias) | Other bias |
|-------------------|---------------------------------------------|-----------------------------------------|-----------------------------------------------------------|-------------------------------------------------|------------------------------------------|--------------------------------------|------------|
| ARDS network 2000 | ?                                           | +                                       | -                                                         | ?                                               | +                                        | +                                    | +          |
| Brochard 1998     | +                                           | +                                       | -                                                         | ?                                               | +                                        | ?                                    | +          |
| Brower 1999       | ?                                           | +                                       | -                                                         | ?                                               | +                                        | ?                                    | +          |
| Villar 2006       | +                                           | +                                       | -                                                         | ?                                               | +                                        | ?                                    | +          |

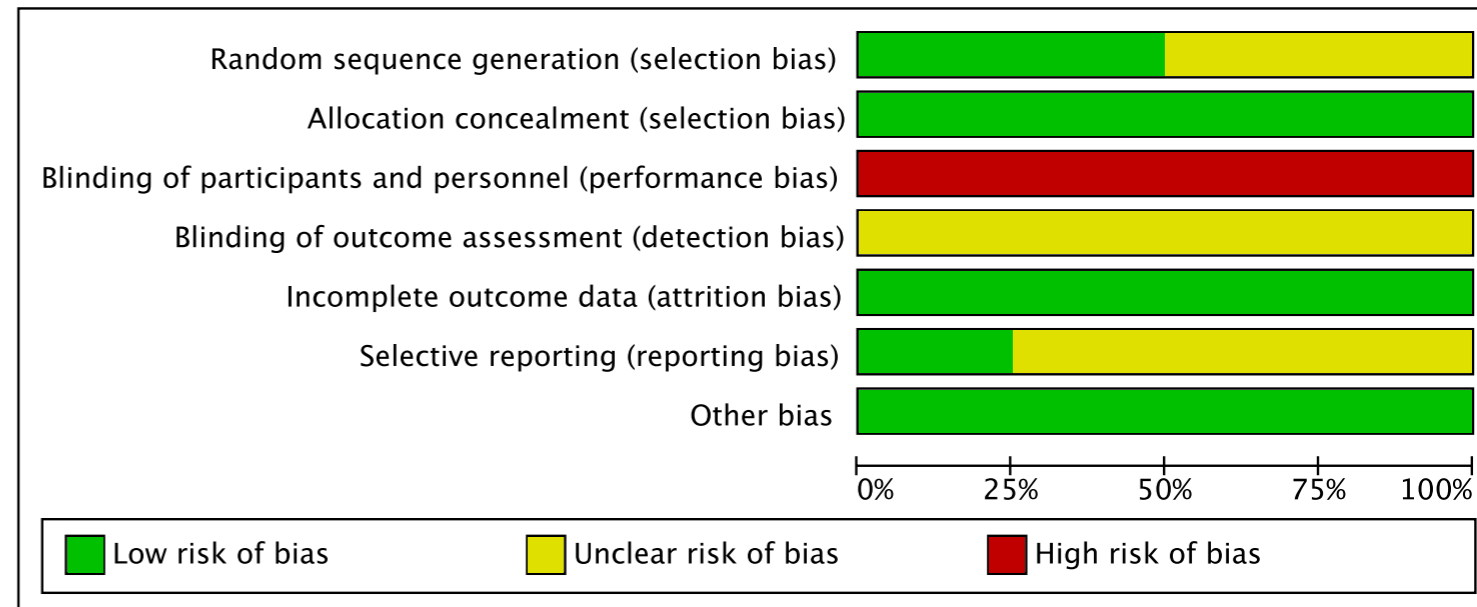

# VFD

|                   | Random sequence generation (selection bias) | Allocation concealment (selection bias) | Blinding of participants and personnel (performance bias) | Blinding of outcome assessment (detection bias) | Incomplete outcome data (attrition bias) | Selective reporting (reporting bias) | Other bias |
|-------------------|---------------------------------------------|-----------------------------------------|-----------------------------------------------------------|-------------------------------------------------|------------------------------------------|--------------------------------------|------------|
| ARDS network 2000 | ?                                           | +                                       | -                                                         | ?                                               | +                                        | +                                    | +          |
| Brower 1999       | ?                                           | +                                       | -                                                         | ?                                               | +                                        | ?                                    | +          |
| Villar 2006       | +                                           | +                                       | -                                                         | ?                                               | -                                        | ?                                    | +          |

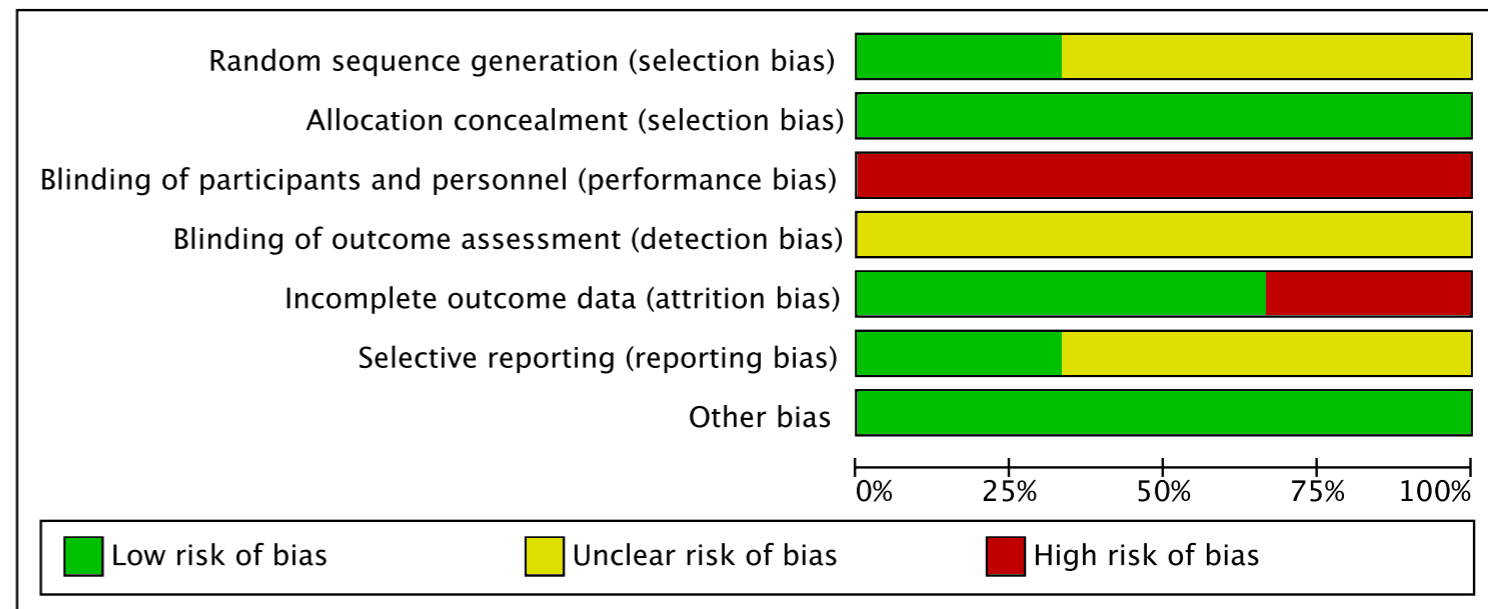

## Barotrauma

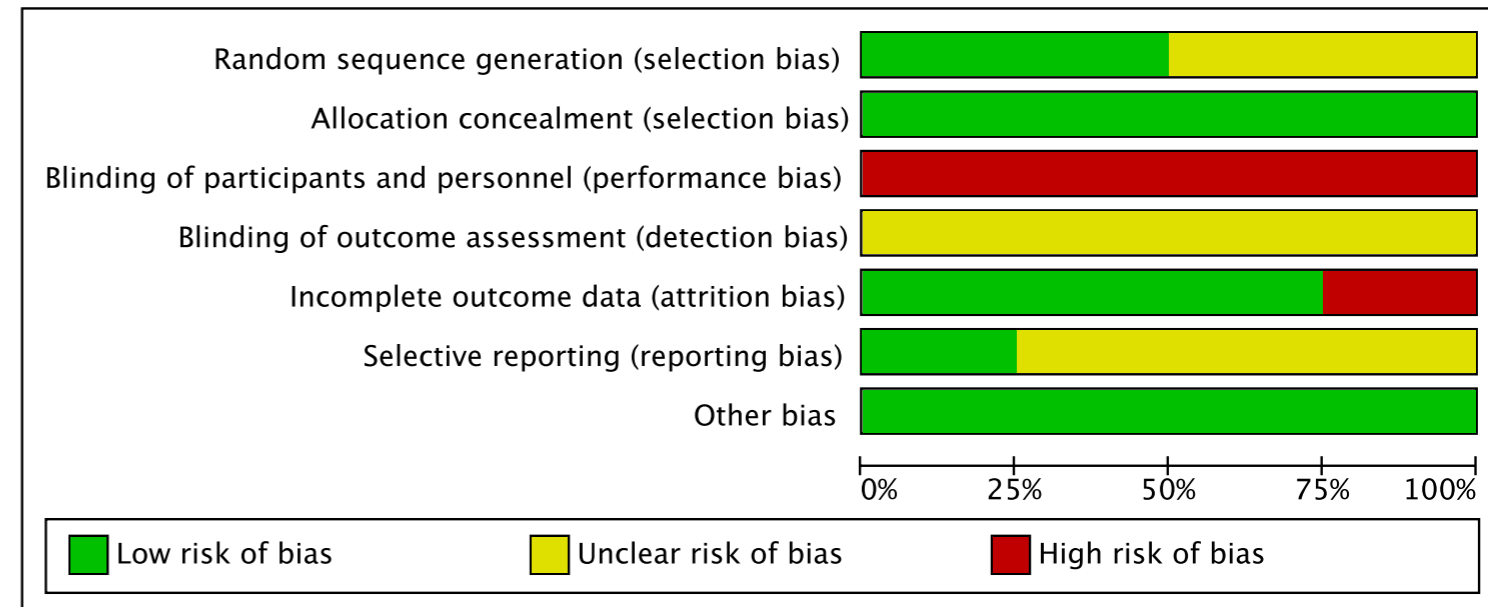

|                   | Random sequence generation (selection bias) | Allocation concealment (selection bias) | Blinding of participants and personnel (performance bias) | Blinding of outcome assessment (detection bias) | Incomplete outcome data (attrition bias) | Selective reporting (reporting bias) | Other bias |
|-------------------|---------------------------------------------|-----------------------------------------|-----------------------------------------------------------|-------------------------------------------------|------------------------------------------|--------------------------------------|------------|
| ARDS network 2000 | ?                                           | +                                       | -                                                         | ?                                               | +                                        | +                                    | +          |
| Brochard 1998     | +                                           | +                                       | -                                                         | ?                                               | +                                        | ?                                    | +          |
| Brower 1999       | ?                                           | +                                       | -                                                         | ?                                               | +                                        | ?                                    | +          |
| Villar 2006       | +                                           | +                                       | -                                                         | ?                                               | -                                        | ?                                    | +          |

## Short term mortality

| Study or Subgroup                                                                                           | low-plateau pressure |            | high-plateau pressure |            | Weight        | Risk Ratio               |
|-------------------------------------------------------------------------------------------------------------|----------------------|------------|-----------------------|------------|---------------|--------------------------|
|                                                                                                             | Events               | Total      | Events                | Total      |               | M-H, Random, 95% CI      |
| ARDS network 2000                                                                                           | 112                  | 432        | 150                   | 429        | 36.4%         | 0.74 [0.60, 0.91]        |
| Brochard 1998                                                                                               | 27                   | 58         | 22                    | 58         | 23.7%         | 1.23 [0.80, 1.89]        |
| Brower 1999                                                                                                 | 13                   | 26         | 12                    | 26         | 17.8%         | 1.08 [0.62, 1.91]        |
| Villar 2006                                                                                                 | 17                   | 53         | 28                    | 50         | 22.1%         | 0.57 [0.36, 0.91]        |
| <b>Total (95% CI)</b>                                                                                       |                      | <b>569</b> |                       | <b>563</b> | <b>100.0%</b> | <b>0.84 [0.62, 1.15]</b> |
| Total events                                                                                                | 169                  |            | 212                   |            |               |                          |
| Heterogeneity: $\text{Tau}^2 = 0.06$ ; $\text{Chi}^2 = 7.47$ , $\text{df} = 3$ ( $P = 0.06$ ); $I^2 = 60\%$ |                      |            |                       |            |               |                          |
| Test for overall effect: $Z = 1.07$ ( $P = 0.29$ )                                                          |                      |            |                       |            |               |                          |

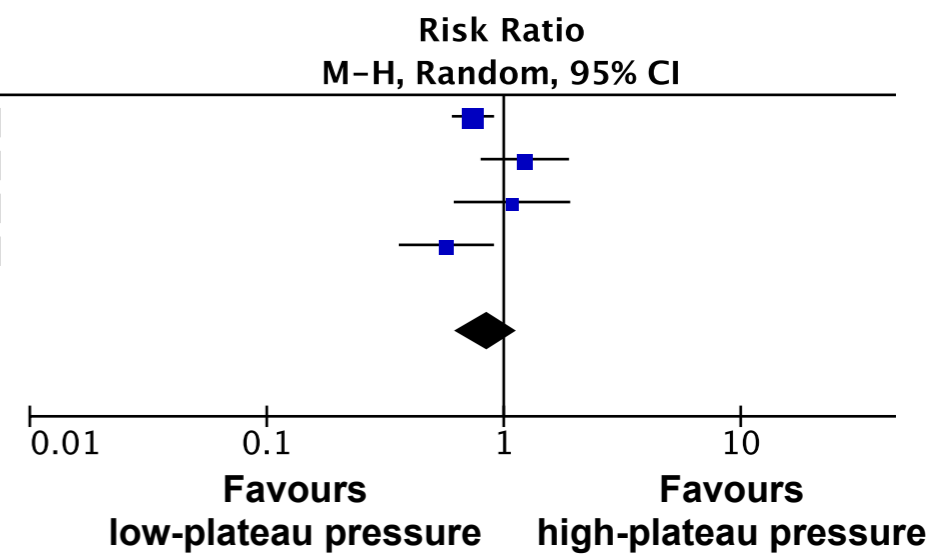

## VFD

| Study or Subgroup                                                                                           | low-plateau pressure |      |            | high-plateau pressure |     |            | Weight        | Mean Difference          |
|-------------------------------------------------------------------------------------------------------------|----------------------|------|------------|-----------------------|-----|------------|---------------|--------------------------|
|                                                                                                             | Mean                 | SD   | Total      | Mean                  | SD  | Total      |               | IV, Random, 95% CI       |
| ARDS network 2000                                                                                           | 12                   | 11   | 432        | 10                    | 11  | 429        | 64.2%         | 2.00 [0.53, 3.47]        |
| Brower 1999                                                                                                 | 9.6                  | 10.3 | 26         | 9.3                   | 9.8 | 26         | 11.7%         | 0.30 [-5.16, 5.76]       |
| Villar 2006                                                                                                 | 10.9                 | 9.5  | 50         | 6                     | 8   | 45         | 24.1%         | 4.90 [1.38, 8.42]        |
| <b>Total (95% CI)</b>                                                                                       |                      |      | <b>508</b> |                       |     | <b>500</b> | <b>100.0%</b> | <b>2.50 [0.51, 4.49]</b> |
| Heterogeneity: $\text{Tau}^2 = 1.04$ ; $\text{Chi}^2 = 2.77$ , $\text{df} = 2$ ( $P = 0.25$ ); $I^2 = 28\%$ |                      |      |            |                       |     |            |               |                          |
| Test for overall effect: $Z = 2.47$ ( $P = 0.01$ )                                                          |                      |      |            |                       |     |            |               |                          |

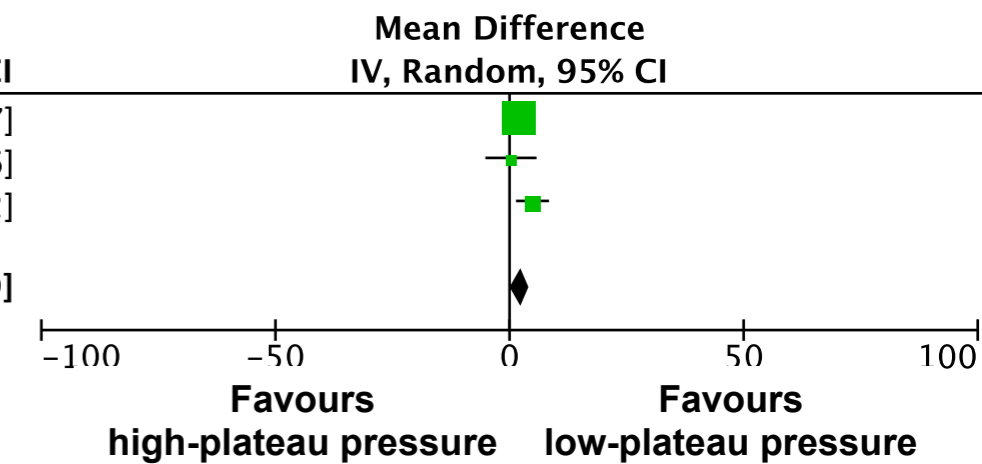

## Barotrauma

| Study or Subgroup                                                                                          | low-plateau pressure |            | high-plateau pressure |            | Weight        | Risk Ratio               |
|------------------------------------------------------------------------------------------------------------|----------------------|------------|-----------------------|------------|---------------|--------------------------|
|                                                                                                            | Events               | Total      | Events                | Total      |               | M-H, Random, 95% CI      |
| ARDS network 2000                                                                                          | 43                   | 432        | 47                    | 429        | 79.7%         | 0.91 [0.61, 1.34]        |
| Brochard 1998                                                                                              | 8                    | 58         | 7                     | 58         | 13.6%         | 1.14 [0.44, 2.95]        |
| Brower 1999                                                                                                | 2                    | 26         | 1                     | 26         | 2.2%          | 2.00 [0.19, 20.72]       |
| Villar 2006                                                                                                | 2                    | 50         | 4                     | 45         | 4.5%          | 0.45 [0.09, 2.34]        |
| <b>Total (95% CI)</b>                                                                                      |                      | <b>566</b> |                       | <b>558</b> | <b>100.0%</b> | <b>0.92 [0.65, 1.31]</b> |
| Total events                                                                                               | 55                   |            | 59                    |            |               |                          |
| Heterogeneity: $\text{Tau}^2 = 0.00$ ; $\text{Chi}^2 = 1.35$ , $\text{df} = 3$ ( $P = 0.72$ ); $I^2 = 0\%$ |                      |            |                       |            |               |                          |
| Test for overall effect: $Z = 0.44$ ( $P = 0.66$ )                                                         |                      |            |                       |            |               |                          |

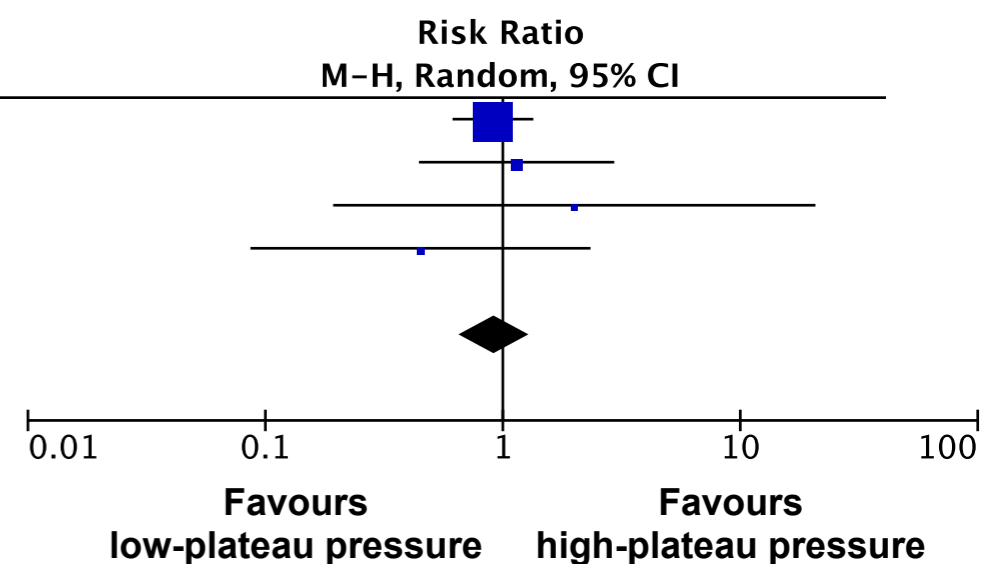

## Summary of findings:

**Lower plateau pressure ( $\leq 30$  cmH<sub>2</sub>O) compared to higher plateau pressure ( $>30$ cmH<sub>2</sub>O) for ARDS**

Patient or population: ARDS

Intervention: Lower plateau pressure ( $\leq 30$  cmH<sub>2</sub>O)Comparison: higher plateau pressure ( $>30$ cmH<sub>2</sub>O)

| Outcomes             | Anticipated absolute effects* (95% CI)                        |                                                                  | Relative effect (95% CI)  | No of participants (studies) | Quality of the evidence (GRADE) | Comments |
|----------------------|---------------------------------------------------------------|------------------------------------------------------------------|---------------------------|------------------------------|---------------------------------|----------|
|                      | Risk with higher plateau pressure ( $>30$ cmH <sub>2</sub> O) | Risk with lower plateau pressure ( $\leq 30$ cmH <sub>2</sub> O) |                           |                              |                                 |          |
| Short term mortality | Study population                                              |                                                                  | RR 0.84<br>(0.62 to 1.15) | 1132<br>(4 RCTs)             | ⊕⊕○○<br>LOW <sup>12</sup>       |          |
|                      | 377 per 1000                                                  | <b>316 per 1000</b><br>(233 to 433)                              |                           |                              |                                 |          |
|                      | Low                                                           |                                                                  |                           |                              |                                 |          |
|                      | 380 per 1000                                                  | <b>319 per 1000</b><br>(236 to 437)                              |                           |                              |                                 |          |
|                      | High                                                          |                                                                  |                           |                              |                                 |          |
|                      | 560 per 1000                                                  | <b>470 per 1000</b><br>(347 to 644)                              |                           |                              |                                 |          |
| VFD                  | Mean <b>9.0</b> days                                          | 2.5 day more MD<br>(0.51 more to 4.49 more)                      |                           | 1008<br>(3 RCTs)             | ⊕⊕⊕○<br>MODERATE <sup>1</sup>   |          |
| Barotrauma           | Study population                                              |                                                                  | RR 0.92<br>(0.65 to 1.31) | 1124<br>(4 RCTs)             | ⊕○○○<br>VERY LOW <sup>123</sup> |          |
|                      | 106 per 1000                                                  | <b>97 per 1000</b><br>(69 to 139)                                |                           |                              |                                 |          |
|                      | Low                                                           |                                                                  |                           |                              |                                 |          |
|                      | 38 per 1000                                                   | <b>35 per 1000</b><br>(24 to 50)                                 |                           |                              |                                 |          |
|                      | High                                                          |                                                                  |                           |                              |                                 |          |
|                      | 120 per 1000                                                  | <b>110 per 1000</b><br>(78 to 157)                               |                           |                              |                                 |          |

\*The risk in the intervention group (and its 95% confidence interval) is based on the assumed risk in the comparison group and the relative effect of the intervention (and its 95% CI).

CI: Confidence interval; RR: Risk ratio ; MD: Mean difference

**GRADE Working Group grades of evidence**

**High quality:** We are very confident that the true effect lies close to that of the estimate of the effect

**Moderate quality:** We are moderately confident in the effect estimate: The true effect is likely to be close to the estimate of the effect, but there is a possibility that it is substantially different

**Low quality:** Our confidence in the effect estimate is limited: The true effect may be substantially different from the estimate of the effect

**Very low quality:** We have very little confidence in the effect estimate: The true effect is likely to be substantially different from the estimate of effect

- 1 Since several studies included this analysis could not make physicians blinded to intervention, the quality of evidence was downgraded by one level.
- 2 Since the confidence interval is wide, the quality of evidence was downgraded by one level.
- 3 Since the sample size was very small, the quality of evidence was downgraded by one level.

**CQ4**

**Question:** How do we set the plateau pressure on artificial respiratory ventilation in adult patients with ARDS?

| Quality assessment   |                   |                      |                          |              |                             |                      | № of patients                                          |                                                     | Effect                 |                                               | Quality                           | Importance |
|----------------------|-------------------|----------------------|--------------------------|--------------|-----------------------------|----------------------|--------------------------------------------------------|-----------------------------------------------------|------------------------|-----------------------------------------------|-----------------------------------|------------|
| № of studies         | Study design      | Risk of bias         | Inconsistency            | Indirectness | Imprecision                 | Other considerations | Lower plateau pressure ( $\leq 30$ cmH <sub>2</sub> O) | higher plateau pressure ( $>30$ cmH <sub>2</sub> O) | Relative (95% CI)      | Absolute (95% CI)                             |                                   |            |
| Short term mortality |                   |                      |                          |              |                             |                      |                                                        |                                                     |                        |                                               |                                   |            |
| 4                    | randomised trials | serious <sup>1</sup> | not serious              | not serious  | serious <sup>2</sup>        | none                 | 169/569 (29.7%)                                        | 212/563 (37.7%)                                     | RR 0.84 (0.62 to 1.15) | 60 fewer per 1000 (from 56 more to 143 fewer) | ⊕⊕○○<br>LOW <sup>1,2</sup>        | CRITICAL   |
|                      |                   |                      |                          |              |                             |                      |                                                        | 38.0%                                               |                        | 61 fewer per 1000 (from 57 more to 144 fewer) |                                   |            |
|                      |                   |                      |                          |              |                             |                      |                                                        | 56.0%                                               |                        | 90 fewer per 1000 (from 84 more to 213 fewer) |                                   |            |
| VFD                  |                   |                      |                          |              |                             |                      |                                                        |                                                     |                        |                                               |                                   |            |
| 3                    | randomised trials | serious <sup>1</sup> | not serious <sup>3</sup> | not serious  | not serious                 | none                 | 508                                                    | 500                                                 |                        | MD 2.5 day more (0.51 more to 4.49 more)      | ⊕⊕⊕○<br>MODERATE <sup>1</sup>     | CRITICAL   |
| Barotrauma           |                   |                      |                          |              |                             |                      |                                                        |                                                     |                        |                                               |                                   |            |
| 4                    | randomised trials | serious <sup>1</sup> | not serious <sup>3</sup> | not serious  | Very serious <sup>2,3</sup> | none                 | 55/566 (9.7%)                                          | 59/558 (10.6%)                                      | RR 0.92 (0.65 to 1.31) | 8 fewer per 1000 (from 33 more to 37 fewer)   | ⊕○○○<br>VERY LOW <sup>1,2,3</sup> | CRITICAL   |
|                      |                   |                      |                          |              |                             |                      |                                                        | 3.8%                                                |                        | 3 fewer per 1000 (from 12 more to 13 fewer)   |                                   |            |
|                      |                   |                      |                          |              |                             |                      |                                                        | 12.0%                                               |                        | 10 fewer per 1000 (from 37 more to 42 fewer)  |                                   |            |

CI: Confidence interval; RR: Risk ratio; MD: Mean difference

- 1 Since several studies included this analysis could not make physicians blinded to intervention, the quality of evidence was downgraded by one level.
- 2 Since the confidence interval is wide, the quality of evidence was downgraded by one level.
- 3 Since the sample size was very small, the quality of evidence was downgraded by one level.



**Evidence-to-Decision table**

**CQ4: How do we set the plateau pressure for mechanical ventilation in adult patients with ARDS?**

PATIENTS: ADULT PATIENTS WITH ARDS

INTERVENTION: LOWER PLATEAU PRESSURE ( $\leq 30$  cmH<sub>2</sub>O)

| CRITERIA                                    | JUDGEMENTS                                                                                                                                                                                                                                                                                                                                                                                                                                                            | RESEARCH EVIDENCE                                                                                                                                                                                                                                                                                                                                                                                                                                                                                                                                                                                                                                                                                                                                                                                                                                                                                                                                                                                                                                                                                                                                                                                                                                                                                                                                                                                                          | ADDITIONAL CONSIDERATIONS                     |                                                           |                                                                  |                                          |                          |                                          |                         |                         |                                               |                        |            |                         |                                               |            |                         |                                               |                         |                 |                  |                                      |   |            |            |                       |                                             |                        |           |                      |                                             |            |                        |                                              |  |
|---------------------------------------------|-----------------------------------------------------------------------------------------------------------------------------------------------------------------------------------------------------------------------------------------------------------------------------------------------------------------------------------------------------------------------------------------------------------------------------------------------------------------------|----------------------------------------------------------------------------------------------------------------------------------------------------------------------------------------------------------------------------------------------------------------------------------------------------------------------------------------------------------------------------------------------------------------------------------------------------------------------------------------------------------------------------------------------------------------------------------------------------------------------------------------------------------------------------------------------------------------------------------------------------------------------------------------------------------------------------------------------------------------------------------------------------------------------------------------------------------------------------------------------------------------------------------------------------------------------------------------------------------------------------------------------------------------------------------------------------------------------------------------------------------------------------------------------------------------------------------------------------------------------------------------------------------------------------|-----------------------------------------------|-----------------------------------------------------------|------------------------------------------------------------------|------------------------------------------|--------------------------|------------------------------------------|-------------------------|-------------------------|-----------------------------------------------|------------------------|------------|-------------------------|-----------------------------------------------|------------|-------------------------|-----------------------------------------------|-------------------------|-----------------|------------------|--------------------------------------|---|------------|------------|-----------------------|---------------------------------------------|------------------------|-----------|----------------------|---------------------------------------------|------------|------------------------|----------------------------------------------|--|
| <b>PROBLEM</b>                              | <input type="radio"/> No<br><input type="radio"/> Probably no<br><input checked="" type="radio"/> Probably yes<br><input type="radio"/> Yes<br>-----<br><input type="radio"/> Varies<br><input type="radio"/> Don't know                                                                                                                                                                                                                                              | <p>When providing mechanical ventilation to adult patients with ARDS, decreased lung compliance is one of the main etiologic factors for the development of ventilator associated lung injury. Ventilator associated lung injury leads not only to delayed weaning, but also increased mortality<sup>1</sup>. Among several causes of ventilator associated lung injury, increased tidal volume and airway pressure are important. Limiting plateau pressure can control both of these factors<sup>2</sup>. Although limiting the plateau pressure is beneficial, it may lead to adverse events such as hypercapnia<sup>3</sup>. While there is as yet no practical way to determine optimal plateau pressure, a method should be developed to minimize ventilator associated lung injury. Therefore, the priority of this CQ is high. As the optimal plateau pressure is undefined, studies comparing various plateau pressures are needed.</p>                                                                                                                                                                                                                                                                                                                                                                                                                                                                           |                                               |                                                           |                                                                  |                                          |                          |                                          |                         |                         |                                               |                        |            |                         |                                               |            |                         |                                               |                         |                 |                  |                                      |   |            |            |                       |                                             |                        |           |                      |                                             |            |                        |                                              |  |
| <b>BENEFITS &amp; HARMES OF THE OPTIONS</b> | <p><b>What is the overall certainty of the evidence of effects?</b></p> <input type="radio"/> Very low<br><input type="radio"/> Low<br><input checked="" type="radio"/> Moderate<br><input type="radio"/> High<br>-----<br><input type="radio"/> No included studies                                                                                                                                                                                                  | <p><b>The relative importance or values of the main outcomes of interest:</b></p> <table border="1"> <thead> <tr> <th>Outcomes</th> <th>Relative importance</th> <th>Certainty of the evidence (GRADE)</th> </tr> </thead> <tbody> <tr> <td>Short term mortality<sub>(note 1)</sub></td> <td>CRITICAL</td> <td>⊕⊕○○<br/>LOW</td> </tr> <tr> <td>VFD<sub>(note 2)</sub></td> <td>CRITICAL</td> <td>⊕⊕⊕○<br/>MODERATE</td> </tr> <tr> <td>Barotrauma</td> <td>CRITICAL</td> <td>⊕○○○<br/>VERY LOW</td> </tr> </tbody> </table>                                                                                                                                                                                                                                                                                                                                                                                                                                                                                                                                                                                                                                                                                                                                                                                                                                                                                               | Outcomes                                      | Relative importance                                       | Certainty of the evidence (GRADE)                                | Short term mortality <sub>(note 1)</sub> | CRITICAL                 | ⊕⊕○○<br>LOW                              | VFD <sub>(note 2)</sub> | CRITICAL                | ⊕⊕⊕○<br>MODERATE                              | Barotrauma             | CRITICAL   | ⊕○○○<br>VERY LOW        |                                               |            |                         |                                               |                         |                 |                  |                                      |   |            |            |                       |                                             |                        |           |                      |                                             |            |                        |                                              |  |
| Outcomes                                    | Relative importance                                                                                                                                                                                                                                                                                                                                                                                                                                                   | Certainty of the evidence (GRADE)                                                                                                                                                                                                                                                                                                                                                                                                                                                                                                                                                                                                                                                                                                                                                                                                                                                                                                                                                                                                                                                                                                                                                                                                                                                                                                                                                                                          |                                               |                                                           |                                                                  |                                          |                          |                                          |                         |                         |                                               |                        |            |                         |                                               |            |                         |                                               |                         |                 |                  |                                      |   |            |            |                       |                                             |                        |           |                      |                                             |            |                        |                                              |  |
| Short term mortality <sub>(note 1)</sub>    | CRITICAL                                                                                                                                                                                                                                                                                                                                                                                                                                                              | ⊕⊕○○<br>LOW                                                                                                                                                                                                                                                                                                                                                                                                                                                                                                                                                                                                                                                                                                                                                                                                                                                                                                                                                                                                                                                                                                                                                                                                                                                                                                                                                                                                                |                                               |                                                           |                                                                  |                                          |                          |                                          |                         |                         |                                               |                        |            |                         |                                               |            |                         |                                               |                         |                 |                  |                                      |   |            |            |                       |                                             |                        |           |                      |                                             |            |                        |                                              |  |
| VFD <sub>(note 2)</sub>                     | CRITICAL                                                                                                                                                                                                                                                                                                                                                                                                                                                              | ⊕⊕⊕○<br>MODERATE                                                                                                                                                                                                                                                                                                                                                                                                                                                                                                                                                                                                                                                                                                                                                                                                                                                                                                                                                                                                                                                                                                                                                                                                                                                                                                                                                                                                           |                                               |                                                           |                                                                  |                                          |                          |                                          |                         |                         |                                               |                        |            |                         |                                               |            |                         |                                               |                         |                 |                  |                                      |   |            |            |                       |                                             |                        |           |                      |                                             |            |                        |                                              |  |
| Barotrauma                                  | CRITICAL                                                                                                                                                                                                                                                                                                                                                                                                                                                              | ⊕○○○<br>VERY LOW                                                                                                                                                                                                                                                                                                                                                                                                                                                                                                                                                                                                                                                                                                                                                                                                                                                                                                                                                                                                                                                                                                                                                                                                                                                                                                                                                                                                           |                                               |                                                           |                                                                  |                                          |                          |                                          |                         |                         |                                               |                        |            |                         |                                               |            |                         |                                               |                         |                 |                  |                                      |   |            |            |                       |                                             |                        |           |                      |                                             |            |                        |                                              |  |
|                                             | <p><b>Is there important uncertainty about or variability in how much people value the main outcomes?</b></p> <input type="radio"/> Important uncertainty or variability<br><input type="radio"/> Possibly important uncertainty or variability<br><input type="radio"/> Possibly no important uncertainty or variability<br><input checked="" type="radio"/> No important uncertainty or variability<br>-----<br><input type="radio"/> No known undesirable outcomes | <p><b>Summary of findings:</b></p> <table border="1"> <thead> <tr> <th>Outcomes</th> <th>Risk with higher plateau pressure (&gt;30cmH<sub>2</sub>O)</th> <th>Risk with lower plateau pressure (<math>\leq 30</math> cmH<sub>2</sub>O)</th> <th>Absolute (95% CI)</th> <th>Relative effect (95% CI)</th> </tr> </thead> <tbody> <tr> <td rowspan="3">Short term mortality<sub>(note 1)</sub></td> <td>377 / 1000</td> <td>316 / 1000 (233 to 433)</td> <td>60 fewer per 1000 (from 56 more to 143 fewer)</td> <td rowspan="3">RR 0.84 (0.62 to 1.15)</td> </tr> <tr> <td>380 / 1000</td> <td>319 / 1000 (236 to 437)</td> <td>61 fewer per 1000 (from 57 more to 144 fewer)</td> </tr> <tr> <td>560 / 1000</td> <td>470 / 1000 (347 to 644)</td> <td>90 fewer per 1000 (from 84 more to 213 fewer)</td> </tr> <tr> <td>VFD<sub>(note 2)</sub></td> <td>Average 9.0 day</td> <td>Average 11.5 day</td> <td>MD 2.5 more (0.51 more to 4.49 more)</td> <td>-</td> </tr> <tr> <td rowspan="3">Barotrauma</td> <td>106 / 1000</td> <td>97 / 1000 (69 to 139)</td> <td>8 fewer per 1000 (from 33 more to 37 fewer)</td> <td rowspan="3">RR 0.92 (0.65 to 1.31)</td> </tr> <tr> <td>38 / 1000</td> <td>35 / 1000 (25 to 50)</td> <td>3 fewer per 1000 (from 12 more to 13 fewer)</td> </tr> <tr> <td>120 / 1000</td> <td>110 / 1000 (78 to 157)</td> <td>10 fewer per 1000 (from 37 more to 42 fewer)</td> </tr> </tbody> </table> | Outcomes                                      | Risk with higher plateau pressure (>30cmH <sub>2</sub> O) | Risk with lower plateau pressure ( $\leq 30$ cmH <sub>2</sub> O) | Absolute (95% CI)                        | Relative effect (95% CI) | Short term mortality <sub>(note 1)</sub> | 377 / 1000              | 316 / 1000 (233 to 433) | 60 fewer per 1000 (from 56 more to 143 fewer) | RR 0.84 (0.62 to 1.15) | 380 / 1000 | 319 / 1000 (236 to 437) | 61 fewer per 1000 (from 57 more to 144 fewer) | 560 / 1000 | 470 / 1000 (347 to 644) | 90 fewer per 1000 (from 84 more to 213 fewer) | VFD <sub>(note 2)</sub> | Average 9.0 day | Average 11.5 day | MD 2.5 more (0.51 more to 4.49 more) | - | Barotrauma | 106 / 1000 | 97 / 1000 (69 to 139) | 8 fewer per 1000 (from 33 more to 37 fewer) | RR 0.92 (0.65 to 1.31) | 38 / 1000 | 35 / 1000 (25 to 50) | 3 fewer per 1000 (from 12 more to 13 fewer) | 120 / 1000 | 110 / 1000 (78 to 157) | 10 fewer per 1000 (from 37 more to 42 fewer) |  |
| Outcomes                                    | Risk with higher plateau pressure (>30cmH <sub>2</sub> O)                                                                                                                                                                                                                                                                                                                                                                                                             | Risk with lower plateau pressure ( $\leq 30$ cmH <sub>2</sub> O)                                                                                                                                                                                                                                                                                                                                                                                                                                                                                                                                                                                                                                                                                                                                                                                                                                                                                                                                                                                                                                                                                                                                                                                                                                                                                                                                                           | Absolute (95% CI)                             | Relative effect (95% CI)                                  |                                                                  |                                          |                          |                                          |                         |                         |                                               |                        |            |                         |                                               |            |                         |                                               |                         |                 |                  |                                      |   |            |            |                       |                                             |                        |           |                      |                                             |            |                        |                                              |  |
| Short term mortality <sub>(note 1)</sub>    | 377 / 1000                                                                                                                                                                                                                                                                                                                                                                                                                                                            | 316 / 1000 (233 to 433)                                                                                                                                                                                                                                                                                                                                                                                                                                                                                                                                                                                                                                                                                                                                                                                                                                                                                                                                                                                                                                                                                                                                                                                                                                                                                                                                                                                                    | 60 fewer per 1000 (from 56 more to 143 fewer) | RR 0.84 (0.62 to 1.15)                                    |                                                                  |                                          |                          |                                          |                         |                         |                                               |                        |            |                         |                                               |            |                         |                                               |                         |                 |                  |                                      |   |            |            |                       |                                             |                        |           |                      |                                             |            |                        |                                              |  |
|                                             | 380 / 1000                                                                                                                                                                                                                                                                                                                                                                                                                                                            | 319 / 1000 (236 to 437)                                                                                                                                                                                                                                                                                                                                                                                                                                                                                                                                                                                                                                                                                                                                                                                                                                                                                                                                                                                                                                                                                                                                                                                                                                                                                                                                                                                                    | 61 fewer per 1000 (from 57 more to 144 fewer) |                                                           |                                                                  |                                          |                          |                                          |                         |                         |                                               |                        |            |                         |                                               |            |                         |                                               |                         |                 |                  |                                      |   |            |            |                       |                                             |                        |           |                      |                                             |            |                        |                                              |  |
|                                             | 560 / 1000                                                                                                                                                                                                                                                                                                                                                                                                                                                            | 470 / 1000 (347 to 644)                                                                                                                                                                                                                                                                                                                                                                                                                                                                                                                                                                                                                                                                                                                                                                                                                                                                                                                                                                                                                                                                                                                                                                                                                                                                                                                                                                                                    | 90 fewer per 1000 (from 84 more to 213 fewer) |                                                           |                                                                  |                                          |                          |                                          |                         |                         |                                               |                        |            |                         |                                               |            |                         |                                               |                         |                 |                  |                                      |   |            |            |                       |                                             |                        |           |                      |                                             |            |                        |                                              |  |
| VFD <sub>(note 2)</sub>                     | Average 9.0 day                                                                                                                                                                                                                                                                                                                                                                                                                                                       | Average 11.5 day                                                                                                                                                                                                                                                                                                                                                                                                                                                                                                                                                                                                                                                                                                                                                                                                                                                                                                                                                                                                                                                                                                                                                                                                                                                                                                                                                                                                           | MD 2.5 more (0.51 more to 4.49 more)          | -                                                         |                                                                  |                                          |                          |                                          |                         |                         |                                               |                        |            |                         |                                               |            |                         |                                               |                         |                 |                  |                                      |   |            |            |                       |                                             |                        |           |                      |                                             |            |                        |                                              |  |
| Barotrauma                                  | 106 / 1000                                                                                                                                                                                                                                                                                                                                                                                                                                                            | 97 / 1000 (69 to 139)                                                                                                                                                                                                                                                                                                                                                                                                                                                                                                                                                                                                                                                                                                                                                                                                                                                                                                                                                                                                                                                                                                                                                                                                                                                                                                                                                                                                      | 8 fewer per 1000 (from 33 more to 37 fewer)   | RR 0.92 (0.65 to 1.31)                                    |                                                                  |                                          |                          |                                          |                         |                         |                                               |                        |            |                         |                                               |            |                         |                                               |                         |                 |                  |                                      |   |            |            |                       |                                             |                        |           |                      |                                             |            |                        |                                              |  |
|                                             | 38 / 1000                                                                                                                                                                                                                                                                                                                                                                                                                                                             | 35 / 1000 (25 to 50)                                                                                                                                                                                                                                                                                                                                                                                                                                                                                                                                                                                                                                                                                                                                                                                                                                                                                                                                                                                                                                                                                                                                                                                                                                                                                                                                                                                                       | 3 fewer per 1000 (from 12 more to 13 fewer)   |                                                           |                                                                  |                                          |                          |                                          |                         |                         |                                               |                        |            |                         |                                               |            |                         |                                               |                         |                 |                  |                                      |   |            |            |                       |                                             |                        |           |                      |                                             |            |                        |                                              |  |
|                                             | 120 / 1000                                                                                                                                                                                                                                                                                                                                                                                                                                                            | 110 / 1000 (78 to 157)                                                                                                                                                                                                                                                                                                                                                                                                                                                                                                                                                                                                                                                                                                                                                                                                                                                                                                                                                                                                                                                                                                                                                                                                                                                                                                                                                                                                     | 10 fewer per 1000 (from 37 more to 42 fewer)  |                                                           |                                                                  |                                          |                          |                                          |                         |                         |                                               |                        |            |                         |                                               |            |                         |                                               |                         |                 |                  |                                      |   |            |            |                       |                                             |                        |           |                      |                                             |            |                        |                                              |  |
|                                             | <p><b>How substantial are the desirable anticipated effects?</b></p> <input type="radio"/> Trivial<br><input type="radio"/> Small<br><input checked="" type="radio"/> Moderate<br><input type="radio"/> Large<br>-----<br><input type="radio"/> Varies<br><input type="radio"/> Don't know                                                                                                                                                                            |                                                                                                                                                                                                                                                                                                                                                                                                                                                                                                                                                                                                                                                                                                                                                                                                                                                                                                                                                                                                                                                                                                                                                                                                                                                                                                                                                                                                                            |                                               |                                                           |                                                                  |                                          |                          |                                          |                         |                         |                                               |                        |            |                         |                                               |            |                         |                                               |                         |                 |                  |                                      |   |            |            |                       |                                             |                        |           |                      |                                             |            |                        |                                              |  |
|                                             | <p><b>How substantial are the undesirable anticipated effects?</b></p> <input type="radio"/> Large<br><input type="radio"/> Moderate<br><input type="radio"/> Small<br><input checked="" type="radio"/> Trivial<br>-----<br><input type="radio"/> Varies<br><input type="radio"/> Don't know                                                                                                                                                                          |                                                                                                                                                                                                                                                                                                                                                                                                                                                                                                                                                                                                                                                                                                                                                                                                                                                                                                                                                                                                                                                                                                                                                                                                                                                                                                                                                                                                                            |                                               |                                                           |                                                                  |                                          |                          |                                          |                         |                         |                                               |                        |            |                         |                                               |            |                         |                                               |                         |                 |                  |                                      |   |            |            |                       |                                             |                        |           |                      |                                             |            |                        |                                              |  |
|                                             |                                                                                                                                                                                                                                                                                                                                                                                                                                                                       | <p><b>Summary:</b> After starting mechanical ventilation, setting plateau pressure below</p>                                                                                                                                                                                                                                                                                                                                                                                                                                                                                                                                                                                                                                                                                                                                                                                                                                                                                                                                                                                                                                                                                                                                                                                                                                                                                                                               |                                               |                                                           |                                                                  |                                          |                          |                                          |                         |                         |                                               |                        |            |                         |                                               |            |                         |                                               |                         |                 |                  |                                      |   |            |            |                       |                                             |                        |           |                      |                                             |            |                        |                                              |  |

|                                                                                    |                                                                                                                      |                                                                                                                                                                                                                                                                                                                                                                                                                                                      |                                                                                                                                                                                                                  |  |
|------------------------------------------------------------------------------------|----------------------------------------------------------------------------------------------------------------------|------------------------------------------------------------------------------------------------------------------------------------------------------------------------------------------------------------------------------------------------------------------------------------------------------------------------------------------------------------------------------------------------------------------------------------------------------|------------------------------------------------------------------------------------------------------------------------------------------------------------------------------------------------------------------|--|
|                                                                                    | <p><b>Does the balance between desirable effects and undesirable effects favor the option or the comparison?</b></p> | <p> <input type="radio"/> Favors the comparison<br/> <input type="radio"/> Probably favors the comparison<br/> <input type="radio"/> Does not favor either the intervention or the comparison<br/> <input type="radio"/> Probably favors the intervention<br/> <input checked="" type="radio"/> Favors the intervention<br/>                 -----<br/> <input type="radio"/> Varies<br/> <input type="radio"/> Don't know             </p>          | <p>30cmH2O show both the extension of VFD (absolute difference 2.5, 95% CI 0.51-4.49) and trends of decrease of mortality RR 0.84, 95% CI 0.62-1.15), but neither are not significant in stastical analysis.</p> |  |
|                                                                                    | <p><b>How large are the resource requirements (costs)?</b></p>                                                       | <p> <input type="radio"/> Large costs<br/> <input type="radio"/> Moderate costs<br/> <input type="radio"/> Negligible costs and savings<br/> <input type="radio"/> Moderate savings<br/> <input checked="" type="radio"/> Large savings<br/>                 -----<br/> <input type="radio"/> Varies<br/> <input type="radio"/> Don't know             </p>                                                                                          | <p>No additional resources are necessary as there is only a change in ventilator settings.</p>                                                                                                                   |  |
| <p style="writing-mode: vertical-rl; transform: rotate(180deg);">RESOURCE USE</p>  | <p><b>Does the cost effectiveness of the option favor the option or the comparison?</b></p>                          | <p> <input type="radio"/> Favors the comparison<br/> <input type="radio"/> Probably favors the comparison<br/> <input type="radio"/> Does not favor either the intervention or the comparison<br/> <input type="radio"/> Probably favors the intervention<br/> <input checked="" type="radio"/> Favors the intervention<br/>                 -----<br/> <input type="radio"/> Varies<br/> <input type="radio"/> No included studies             </p> | <p>As there are no additional resources required, the cost effectiveness of the option favors the intervention.</p>                                                                                              |  |
| <p style="writing-mode: vertical-rl; transform: rotate(180deg);">EQUITY</p>        | <p><b>What would be the impact on health equity?</b></p>                                                             | <p> <input checked="" type="radio"/> Reduced<br/> <input type="radio"/> Probably reduced<br/> <input type="radio"/> Probably no impact<br/> <input type="radio"/> Probably increased<br/> <input type="radio"/> Increased<br/>                 -----<br/> <input type="radio"/> Varies<br/> <input type="radio"/> Don't know             </p>                                                                                                        | <p>The suggested intervention is available in any medical facility that provides mechanical ventilation, no additional procedures are required. Thus, unfairness cannot occur.</p>                               |  |
| <p style="writing-mode: vertical-rl; transform: rotate(180deg);">ACCEPTABILITY</p> | <p><b>Is the option acceptable to key stakeholders?</b></p>                                                          | <p> <input type="radio"/> No<br/> <input type="radio"/> Probably no<br/> <input checked="" type="radio"/> Probably yes<br/> <input type="radio"/> Yes<br/>                 -----<br/> <input type="radio"/> Varies<br/> <input type="radio"/> Don't know             </p>                                                                                                                                                                            |                                                                                                                                                                                                                  |  |

|             |                                                    |                                                                                                                                                                                                                                                                                                                                                      |  |
|-------------|----------------------------------------------------|------------------------------------------------------------------------------------------------------------------------------------------------------------------------------------------------------------------------------------------------------------------------------------------------------------------------------------------------------|--|
| FEASIBILITY | <p><b>Is the option feasible to implement?</b></p> | <p> <input type="radio"/> No<br/> <input type="radio"/> Probably no<br/> <input type="radio"/> Probably yes<br/> <input checked="" type="radio"/> Yes<br/>                 -----<br/> <input type="radio"/> Varies<br/> <input type="radio"/> Don't know             </p> <p>It is feasible, because it is only a change in ventilator settings.</p> |  |
|-------------|----------------------------------------------------|------------------------------------------------------------------------------------------------------------------------------------------------------------------------------------------------------------------------------------------------------------------------------------------------------------------------------------------------------|--|

## Recommendation

### CQ4: How do we set the plateau pressure for mechanical ventilation in adult patients with ARDS?

| Balance of consequences | Undesirable consequences <i>clearly outweigh</i> desirable consequences in most settings | Undesirable consequences <i>probably outweigh</i> desirable consequences in most settings | The balance between desirable and undesirable consequences is closely <i>balanced or uncertain</i> | Desirable consequences <i>probably outweigh</i> undesirable consequences in most settings | Desirable consequences <i>clearly outweigh</i> undesirable consequences in most settings |
|-------------------------|------------------------------------------------------------------------------------------|-------------------------------------------------------------------------------------------|----------------------------------------------------------------------------------------------------|-------------------------------------------------------------------------------------------|------------------------------------------------------------------------------------------|
| Judgement               | ○                                                                                        | ○                                                                                         | ○                                                                                                  | ●                                                                                         | ○                                                                                        |

| Type of recommendation               | We recommend against offering this option                                                                                                                                                                                                                                                                                                                                                                                                                                                                                                                                                                                                                                                                                                                                                                                                                                                                                                                                                                                                                                                                                                                                                                                                                                                                                                                                                                                                                                                                                                                                                                                                                                                                                                                                                                                                                                                                                                                                                                                                                                                                                                                                                                                                                                                                                                                                                                                                                                                                                                                                                                                                                                                                                                                                                                                                                                 | We suggest not offering this option | We suggest offering this option | We recommend offering this option |
|--------------------------------------|---------------------------------------------------------------------------------------------------------------------------------------------------------------------------------------------------------------------------------------------------------------------------------------------------------------------------------------------------------------------------------------------------------------------------------------------------------------------------------------------------------------------------------------------------------------------------------------------------------------------------------------------------------------------------------------------------------------------------------------------------------------------------------------------------------------------------------------------------------------------------------------------------------------------------------------------------------------------------------------------------------------------------------------------------------------------------------------------------------------------------------------------------------------------------------------------------------------------------------------------------------------------------------------------------------------------------------------------------------------------------------------------------------------------------------------------------------------------------------------------------------------------------------------------------------------------------------------------------------------------------------------------------------------------------------------------------------------------------------------------------------------------------------------------------------------------------------------------------------------------------------------------------------------------------------------------------------------------------------------------------------------------------------------------------------------------------------------------------------------------------------------------------------------------------------------------------------------------------------------------------------------------------------------------------------------------------------------------------------------------------------------------------------------------------------------------------------------------------------------------------------------------------------------------------------------------------------------------------------------------------------------------------------------------------------------------------------------------------------------------------------------------------------------------------------------------------------------------------------------------------|-------------------------------------|---------------------------------|-----------------------------------|
| Judgement                            | ○                                                                                                                                                                                                                                                                                                                                                                                                                                                                                                                                                                                                                                                                                                                                                                                                                                                                                                                                                                                                                                                                                                                                                                                                                                                                                                                                                                                                                                                                                                                                                                                                                                                                                                                                                                                                                                                                                                                                                                                                                                                                                                                                                                                                                                                                                                                                                                                                                                                                                                                                                                                                                                                                                                                                                                                                                                                                         | ○                                   | ●                               | ○                                 |
| <b>Recommendation</b>                | <b>We suggest setting the plateau pressure at 30cmH<sub>2</sub>O or less in adult patients with ARDS undergoing mechanical ventilation. (GRADE2B, weak recommendation / evidence level moderate)</b>                                                                                                                                                                                                                                                                                                                                                                                                                                                                                                                                                                                                                                                                                                                                                                                                                                                                                                                                                                                                                                                                                                                                                                                                                                                                                                                                                                                                                                                                                                                                                                                                                                                                                                                                                                                                                                                                                                                                                                                                                                                                                                                                                                                                                                                                                                                                                                                                                                                                                                                                                                                                                                                                      |                                     |                                 |                                   |
| <b>Justification</b>                 | <p><b>Question:</b> What is the optimal plateau pressure for mechanical ventilation in adult patients with ARDS?</p> <p><b>Patients:</b> ARDS patients requiring mechanical ventilation.</p> <p><b>Interventions:</b> Lower plateau pressure (<math>\leq 30</math> cmH<sub>2</sub>O)</p> <p><b>Comparison:</b> higher plateau pressure (<math>&gt;30</math>cmH<sub>2</sub>O)</p> <p><b>Outcomes:</b> Mortality*1, Ventilator Free Days*2, barotrauma*3</p> <p><b>Summary of the evidence:</b> Four RCTs (total number of patients=1132) were selected for this systematic review. By setting the plateau pressure below 30cmH<sub>2</sub>O, the number of ventilator free days (VFD) was significantly increased (mean 2.5days, 95% CI 0.51-4.49). The mortality (RR 0.84, 95%CI 0.62-1.15) and lung injury caused by high airway pressure (RR 0.92, 95%CI 0.65-1.31) were decreased, but there is no statistically significant difference.</p> <p><b>Quality of the evidence:</b> In these RCTs that compare values of ventilator settings (such as comparing two plateau pressures), it is difficult to blind the entire study to patients and medical staff. Thus, we determined the risk of bias for all outcomes as 'serious' and downgraded them as a whole. There is no inconsistency or indirectness. Although the total number of events (death, 381/1132 patients), is sufficient, there is no statistically significant difference. The 95% confidence interval is considered to be wide. Thus we determined it is 'serious' in terms of mortality. Overall, we conclude that the quality of evidence in these 4 RCTs is "moderate".</p> <p><b>Judgement of benefit and harm, resources and cost:</b> Ventilator associated respiratory injury caused by an increase in plateau pressure is obviously a serious adverse event. Thus, limiting the plateau pressure would be accepted by patients without any hesitation. It is assumed that most patients will select limiting plateau pressure on the ventilator. There is no change in resources required by changing the ventilator settings. As there is no additional increase of required resources, the benefit prevails. Hypoxemia, hypercapnia and increased work of breathing caused by inappropriate ventilator settings are possible harms in this CQ. However, these harms are relatively permissive and should not cause any serious sequelae.</p> <p><b>Recommendations:</b> We suggest setting the plateau pressure at 30cmH<sub>2</sub>O or less in adult patients with ARDS undergoing mechanical ventilation. (GRADE2B, weak recommendation / evidence level moderate)</p> <p><b>Additional considerations:</b> As trans-pulmonary pressure is now drawing a lot of attention, it is necessary to consider a comparison of plateau pressures when patients are spontaneously breathing.</p> |                                     |                                 |                                   |
| <b>Subgroup considerations</b>       | None                                                                                                                                                                                                                                                                                                                                                                                                                                                                                                                                                                                                                                                                                                                                                                                                                                                                                                                                                                                                                                                                                                                                                                                                                                                                                                                                                                                                                                                                                                                                                                                                                                                                                                                                                                                                                                                                                                                                                                                                                                                                                                                                                                                                                                                                                                                                                                                                                                                                                                                                                                                                                                                                                                                                                                                                                                                                      |                                     |                                 |                                   |
| <b>Implementation considerations</b> | In some cases, it may be difficult to ensure sufficient minute ventilation by managing low plateau pressure, that may cause decreased oxygenation, increased carbon dioxide concentration and/or                                                                                                                                                                                                                                                                                                                                                                                                                                                                                                                                                                                                                                                                                                                                                                                                                                                                                                                                                                                                                                                                                                                                                                                                                                                                                                                                                                                                                                                                                                                                                                                                                                                                                                                                                                                                                                                                                                                                                                                                                                                                                                                                                                                                                                                                                                                                                                                                                                                                                                                                                                                                                                                                          |                                     |                                 |                                   |

|                                                 |                                                                                                                                                                                                                                                                               |
|-------------------------------------------------|-------------------------------------------------------------------------------------------------------------------------------------------------------------------------------------------------------------------------------------------------------------------------------|
|                                                 | increased work of breathing.                                                                                                                                                                                                                                                  |
| <b>Monitoring and evaluation considerations</b> | As the intervention is a change in ventilator settings, we should monitor oxygenation and other appropriate parameters of mechanical ventilation.                                                                                                                             |
| <b>Research possibilities</b>                   | As the optimal plateau pressure is undefined, studies comparing various plateau pressures are needed. As trans-pulmonary pressure is now drawing a lot of attention, it is necessary to consider a comparison of plateau pressures when patients are spontaneously breathing. |

Note 1) Mortality rate in ARDS 2000 is 28days mortality (read from Kaplan-Meier Curve), and the others are death at the end of research.

Note 2) VFD means the number of days free from mechanical ventilation in the initial 28 days. If the patient expired within 28 days, VFD was counted as zero.

## CQ05. Study flow diagram

\*This CQ was partly evaluated by Santa Cruz using Cochrane database (to May 2013)<sup>1)</sup>. We also searched literature from 2013 to May 2015.

1. Santa Cruz R, Rojas JI, Nervi R, et al. High versus low positive end-expiratory pressure (PEEP) levels for mechanically ventilated adult patients with acute lung injury and acute respiratory distress syndrome. *Cochrane Database Syst Rev* 6: CD009098, 2013. PMID 23740697

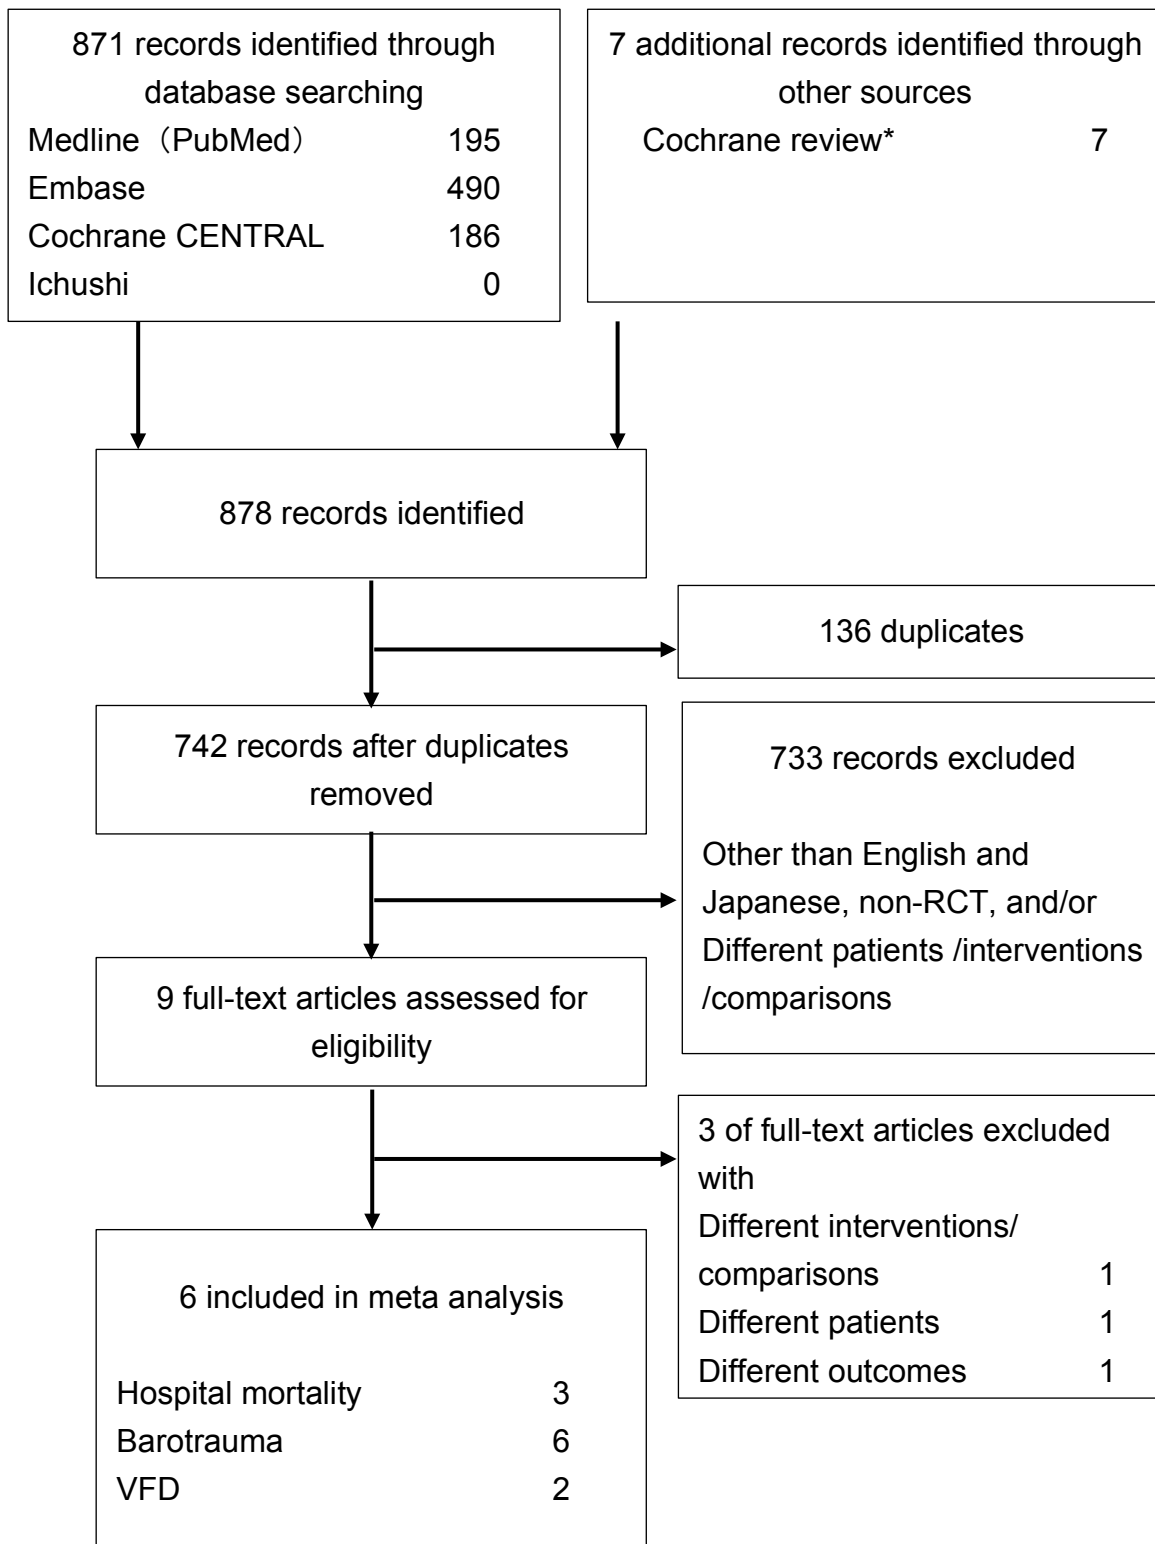

| mortality                                 |                               | Short term mortality                      |                                    | risk of bias       |                    | not serious (0)                         |                                                              |                                   |                                              |
|-------------------------------------------|-------------------------------|-------------------------------------------|------------------------------------|--------------------|--------------------|-----------------------------------------|--------------------------------------------------------------|-----------------------------------|----------------------------------------------|
| 番号                                        | 著者名 発表年<br>(Forest plot表示)    | risk of bias評価                            |                                    |                    |                    |                                         |                                                              |                                   |                                              |
|                                           |                               | ランダム割付順序の生成<br>random sequence generation | 割り付けの隠蔽化<br>allocation concealment | ブラインド<br>blinding  |                    | 不完全なアウトカムデータ<br>incomplete outcome data | 選択されたアウトカムの報告<br>selective outcome reporting                 | その他のバイアス<br>Other sources of bias | 研究内でのバイアスのリスク<br>Risk of bias within a study |
| 研究参加者と治療提供者<br>participants and personnel | アウトカム評価者<br>outcome assessors |                                           |                                    |                    |                    |                                         |                                                              |                                   |                                              |
| 1                                         | Brower 2004                   | Low risk                                  | Low risk                           | Low risk           | Low risk           | Low risk                                | High risk                                                    | High risk                         | Unclear risk                                 |
| 2                                         | Meade 2008                    | Low risk                                  | Low risk                           | Low risk           | Low risk           | Low risk                                | Low risk                                                     | Low risk                          | Low risk                                     |
| 3                                         | Mercat 2008                   | Low risk                                  | Low risk                           | Low risk           | Low risk           | Low risk                                | Low risk                                                     | Low risk                          | Low risk                                     |
|                                           |                               |                                           |                                    |                    |                    |                                         |                                                              |                                   |                                              |
| 番号                                        | 著者名 発表年<br>(Forest plot表示)    | risk of biasコメント                          |                                    |                    |                    |                                         |                                                              |                                   |                                              |
| 1                                         | Brower 2004                   | 乱数表を使ったか否かの説明なし                           | 隠蔽化されている                           | 死亡というoutcomeに影響しない | 死亡というoutcomeに影響しない | 100%フォローされた                             | supplementary appendix 1で示されているoutcomeと論文中のoutcomeの記載に不一致がある | 死亡数が144で中断                        | 2つのhigh riskがあり、看過できない                       |
| 2                                         | Meade 2008                    | 中央システムでランダム化                              | allocation concealmentされている        | 死亡というoutcomeに影響しない | 死亡というoutcomeに影響しない | 100%フォローされた                             | 100%報告されている                                                  | 年齢・敗血症割合ともに差は大きくない                | 全てがlow riskのため                               |
| 3                                         | Mercat 2008                   | 方法は不明であるが中央でランダム割付と記されている                 | 中央割付である                            | 死亡というoutcomeに影響しない | 死亡というoutcomeに影響しない | 欠損は両群あわせて1であり、問題ない                      | trial registrationがされ予め決められており、全てのoutcomeが報告されている            | studyが中断されているが死亡数が200以上である        | 全てがlow riskのため                               |

| Outcome                                   |                               | VFD                                       | risk of bias                       |                                    | not serious (0)                |                                         |                                                              |                                   |                                              |
|-------------------------------------------|-------------------------------|-------------------------------------------|------------------------------------|------------------------------------|--------------------------------|-----------------------------------------|--------------------------------------------------------------|-----------------------------------|----------------------------------------------|
| 番号                                        | 著者名 発表年<br>(Forest plot表示)    | risk of bias評価                            |                                    |                                    |                                |                                         |                                                              |                                   |                                              |
|                                           |                               | ランダム割付順序の生成<br>random sequence generation | 割り付けの隠蔽化<br>allocation concealment | ブラインド<br>blinding                  |                                | 不完全なアウトカムデータ<br>incomplete outcome data | 選択されたアウトカムの報告<br>selective outcome reporting                 | その他のバイアス<br>Other sources of bias | 研究内でのバイアスのリスク<br>Risk of bias within a study |
| 研究参加者と治療提供者<br>participants and personnel | アウトカム評価者<br>outcome assessors |                                           |                                    |                                    |                                |                                         |                                                              |                                   |                                              |
| 1                                         | Brower 2004                   | Low risk                                  | Low risk                           | High risk                          | Low risk                       | Low risk                                | High risk                                                    | Low risk                          | Unclear risk                                 |
| 2                                         | Villar 2006                   | Low risk                                  | Low risk                           | High risk                          | Low risk                       | Low risk                                | Unclear risk                                                 | High risk                         | Unclear risk                                 |
|                                           |                               |                                           |                                    |                                    |                                |                                         |                                                              |                                   |                                              |
| 番号                                        | 著者名 発表年<br>(Forest plot表示)    | risk of biasコメント                          |                                    |                                    |                                |                                         |                                                              |                                   |                                              |
| 1                                         | Brower 2004                   | ランダム化されているが方法が未記載                         | 隠蔽化されている                           | Blindされていないため、抜管という判断にbiasが入る余地がある | VFDというoutcomeの評価に影響するとは考えられない。 | 100%フォローされた                             | supplementary appendix 1で示されているoutcomeと論文中のoutcomeの記載に不一致がある | studyが中断されているが、標本数が500以上。         | high riskが2項目あるため                            |
| 2                                         | Villar 2006                   | 封筒法                                       | 隠蔽化されている                           | Blindされていないため、抜管の判断にBiasが入る余地がある   | VFDというoutcomeに影響しない            | randomizationに失敗した施設の患者を除外したため、問題ない     | pre-registrationについての記述がない                                   | イベント数が98でstudyが中断                 | high riskが2項目あるため                            |



| Outcome |                            | barotrauma                                |                                    | risk of bias                                       |                               | not serious (0)                         |                                                              |                                         |                                              |
|---------|----------------------------|-------------------------------------------|------------------------------------|----------------------------------------------------|-------------------------------|-----------------------------------------|--------------------------------------------------------------|-----------------------------------------|----------------------------------------------|
| 番号      | 著者名 発表年<br>(Forest plot表示) | risk of bias評価                            |                                    |                                                    |                               |                                         |                                                              |                                         |                                              |
|         |                            | ランダム割付順序の生成<br>random sequence generation | 割り付けの隠蔽化<br>allocation concealment | ブラインド<br>blinding                                  |                               | 不完全なアウトカムデータ<br>incomplete outcome data | 選択されたアウトカムの報告<br>selective outcome reporting                 | その他のバイアス<br>Other sources of bias       | 研究内でのバイアスのリスク<br>Risk of bias within a study |
|         |                            |                                           |                                    | 研究参加者と治療提供者<br>participants and personnel          | アウトカム評価者<br>outcome assessors |                                         |                                                              |                                         |                                              |
| 1       | Amato 1998                 | Low risk                                  | Low risk                           | Low risk                                           | Unclear risk                  | Low risk                                | Low risk                                                     | High risk                               | Low risk                                     |
| 2       | Brower 2004                | Low risk                                  | Low risk                           | Low risk                                           | High risk                     | Low risk                                | High risk                                                    | High risk                               | Unclear risk                                 |
| 3       | Huh 2009                   | Low risk                                  | Unclear risk                       | Low risk                                           | Unclear risk                  | High risk                               | Low risk                                                     | Low risk                                | Low risk                                     |
| 4       | Meade 2008                 | Low risk                                  | Low risk                           | Low risk                                           | Unclear risk                  | Low risk                                | Low risk                                                     | Low risk                                | Low risk                                     |
| 5       | Mercat 2008                | Low risk                                  | Low risk                           | Low risk                                           | Unclear risk                  | Low risk                                | Low risk                                                     | High risk                               | Low risk                                     |
| 6       | Villar 2006                | Low risk                                  | Low risk                           | Low risk                                           | Unclear risk                  | Low risk                                | Unclear risk                                                 | High risk                               | Low risk                                     |
|         |                            |                                           |                                    |                                                    |                               |                                         |                                                              |                                         |                                              |
| 番号      | 著者名 発表年<br>(Forest plot表示) | risk of biasコメント                          |                                    |                                                    |                               |                                         |                                                              |                                         |                                              |
| 1       | Amato 1998                 | ランダム化の方法の情報が不十分                           | sealed envelopeで1:1にrandomizeされている | 換気量の違いをblindすることはできないがoutcomeに開胸は無いと思われる           | outcomeの評価に主観が入りうる            | 100%フォローされた                             | 100%報告された                                                    | 死亡数が53でstudyが中断されている                    | 全項目ほぼLow risk                                |
| 2       | Brower 2004                | ランダム化の方法が未記載                              | 隠蔽化されている                           | 圧損傷というoutcomeに影響しない                                | 画像での評価のため、主観が入りうる             | 100%フォローされた                             | supplementary appendix 1で示されているoutcomeと論文中のoutcomeの記載に不一致がある | イベント数が55で中断                             | 全項目ほぼLow risk                                |
| 3       | Huh 2009                   | 方法は不明であるがランダム割り付けたと記されている                 | ランダム化の詳細の記載がなく、判断できない              | 肺合併症というoutcomeに影響しない                               | 評価表の記載がなく、主観が入りうる             | PEEP-only groupで10%が脱落                  | 100%報告された                                                    | 研究の中断なし                                 | 全項目ほぼLow risk                                |
| 4       | Meade 2008                 | 中央システムでランダム化                              | Concealed randomizationされている       | 肺合併症というoutcomeに影響しない                               | 評価表の記載がなく、主観が入りうる             | 100%フォローされた                             | 100%報告された                                                    | 7人の患者がwithdrawしているが、outcomeに影響はないと考えられる | 全項目ともLow risk                                |
| 5       | Mercat 2008                | 方法は不明であるが中央でランダム割付と記されている                 | 中央割付である                            | 研究の主要な職員には盲検化がなされていないと考えられるが、それがアウトカムに影響するとは考えられない | 評価表の記載がなく、主観が入りうる             | 欠損は両群あわせて1であり、問題ない                      | 事前登録がされず決められていた                                              | studyが中断されており、総event数が48でしかないためriskは高い  | 1項目high riskがあるものの、多くの項目がlow riskであるから       |
| 6       | Villar 2006                | 封筒法                                       | 隠蔽化されている                           | 肺合併症というoutcomeに影響しない                               | 評価表の記載がなく、主観が入りうる             | ランダム化に失敗した施設の患者を除外したため、問題ない             | 事前登録についての記述がない                                               | studyが中断されている                           | 1項目high riskがあるものの、多くの項目がlow riskであるから       |

## Short term mortality

|            | Random sequence generation (selection bias) | Allocation concealment (selection bias) | Blinding of participants and personnel (performance bias) | Blinding of outcome assessment (detection bias) | Incomplete outcome data (attrition bias) | Selective reporting (reporting bias) | Other bias |
|------------|---------------------------------------------|-----------------------------------------|-----------------------------------------------------------|-------------------------------------------------|------------------------------------------|--------------------------------------|------------|
| Brower2004 | +                                           | +                                       | +                                                         | +                                               | +                                        | -                                    | -          |
| Meade2008  | +                                           | +                                       | +                                                         | +                                               | +                                        | +                                    | +          |
| Mercat2008 | +                                           | +                                       | +                                                         | +                                               | +                                        | +                                    | +          |

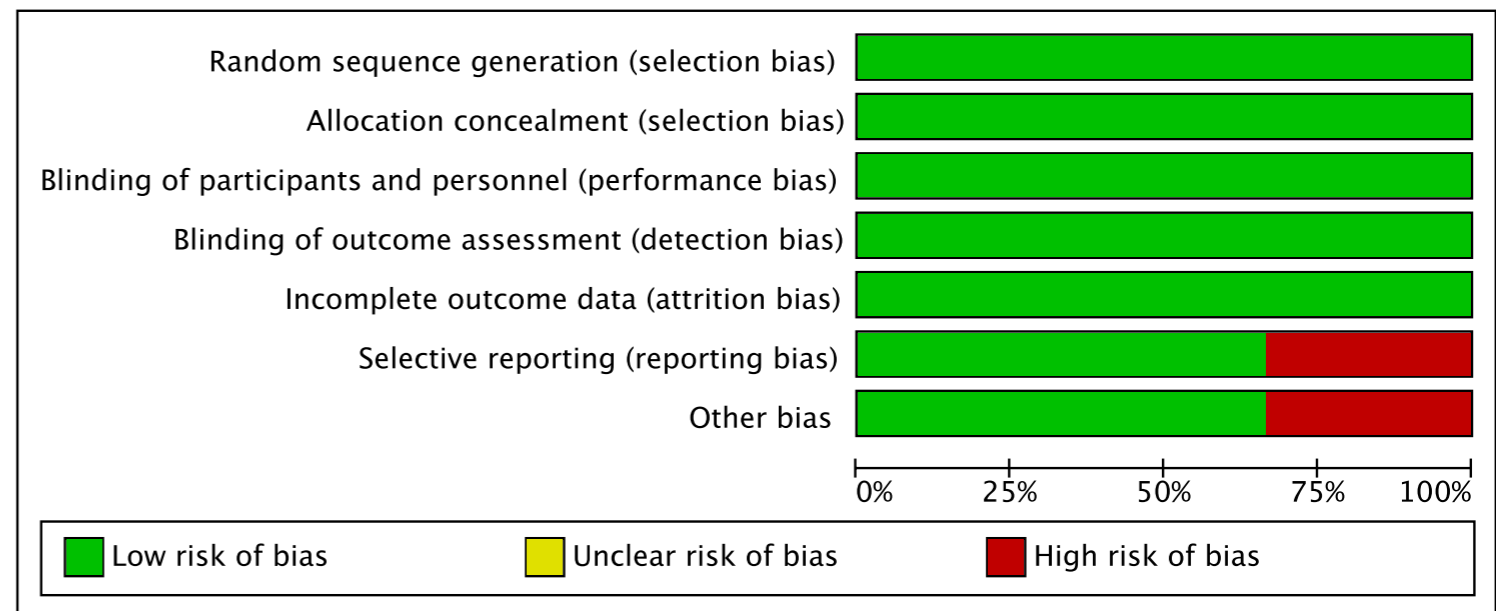

## Barotrauma

|            | Random sequence generation (selection bias) | Allocation concealment (selection bias) | Blinding of participants and personnel (performance bias) | Blinding of outcome assessment (detection bias) | Incomplete outcome data (attrition bias) | Selective reporting (reporting bias) | Other bias |
|------------|---------------------------------------------|-----------------------------------------|-----------------------------------------------------------|-------------------------------------------------|------------------------------------------|--------------------------------------|------------|
| Amato1998  | +                                           | +                                       | +                                                         | ?                                               | +                                        | +                                    | -          |
| Brower2004 | +                                           | +                                       | +                                                         | -                                               | +                                        | -                                    | -          |
| Huh2009    | +                                           | ?                                       | +                                                         | ?                                               | -                                        | +                                    | +          |
| Meade2008  | +                                           | +                                       | +                                                         | ?                                               | +                                        | +                                    | +          |
| Mercat2008 | +                                           | +                                       | +                                                         | ?                                               | +                                        | +                                    | -          |
| Villar2006 | +                                           | +                                       | +                                                         | ?                                               | +                                        | ?                                    | -          |

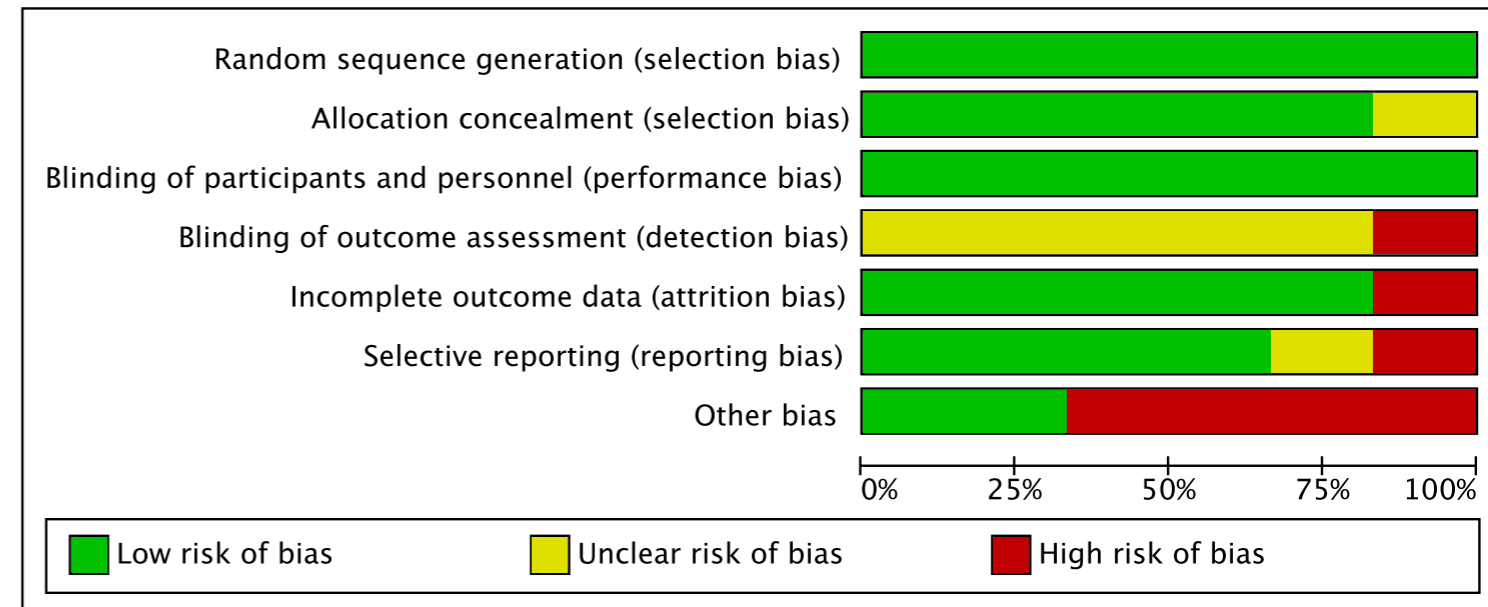

# VFD

|            | Random sequence generation (selection bias) | Allocation concealment (selection bias) | Blinding of participants and personnel (performance bias) | Blinding of outcome assessment (detection bias) | Incomplete outcome data (attrition bias) | Selective reporting (reporting bias) | Other bias |
|------------|---------------------------------------------|-----------------------------------------|-----------------------------------------------------------|-------------------------------------------------|------------------------------------------|--------------------------------------|------------|
| Brower2004 | +                                           | +                                       | -                                                         | +                                               | +                                        | -                                    | +          |
| Villar2006 | +                                           | +                                       | -                                                         | +                                               | +                                        | ?                                    | -          |

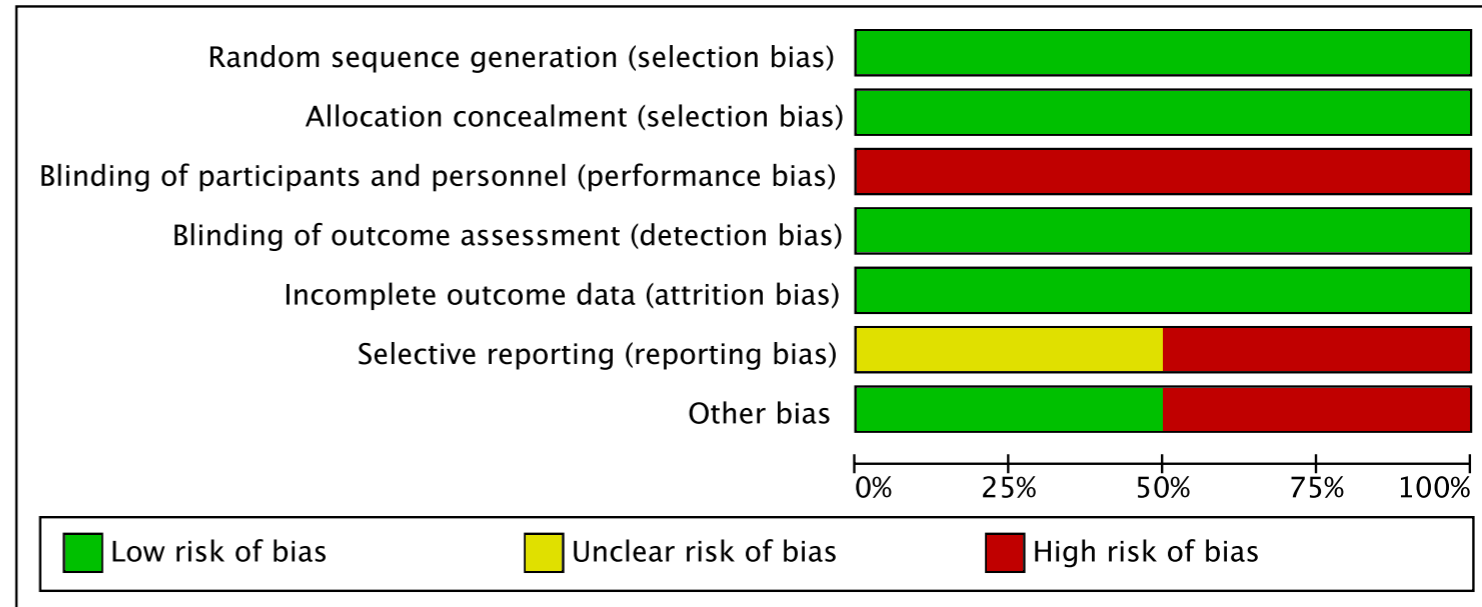

## Short term mortality

| Study or Subgroup                                                                                       | High PEEP |             | Low PEEP |             | Weight        | Risk Ratio<br>M-H, Random, 95% CI |
|---------------------------------------------------------------------------------------------------------|-----------|-------------|----------|-------------|---------------|-----------------------------------|
|                                                                                                         | Events    | Total       | Events   | Total       |               |                                   |
| Brower2004                                                                                              | 76        | 276         | 68       | 273         | 15.5%         | 1.11 [0.83, 1.46]                 |
| Meade2008                                                                                               | 173       | 475         | 205      | 508         | 48.4%         | 0.90 [0.77, 1.06]                 |
| Mercat2008                                                                                              | 136       | 385         | 149      | 382         | 36.0%         | 0.91 [0.75, 1.09]                 |
| <b>Total (95% CI)</b>                                                                                   |           | <b>1136</b> |          | <b>1163</b> | <b>100.0%</b> | <b>0.93 [0.83, 1.04]</b>          |
| Total events                                                                                            | 385       |             | 422      |             |               |                                   |
| Heterogeneity: Tau <sup>2</sup> = 0.00; Chi <sup>2</sup> = 1.67, df = 2 (P = 0.43); I <sup>2</sup> = 0% |           |             |          |             |               |                                   |
| Test for overall effect: Z = 1.24 (P = 0.22)                                                            |           |             |          |             |               |                                   |

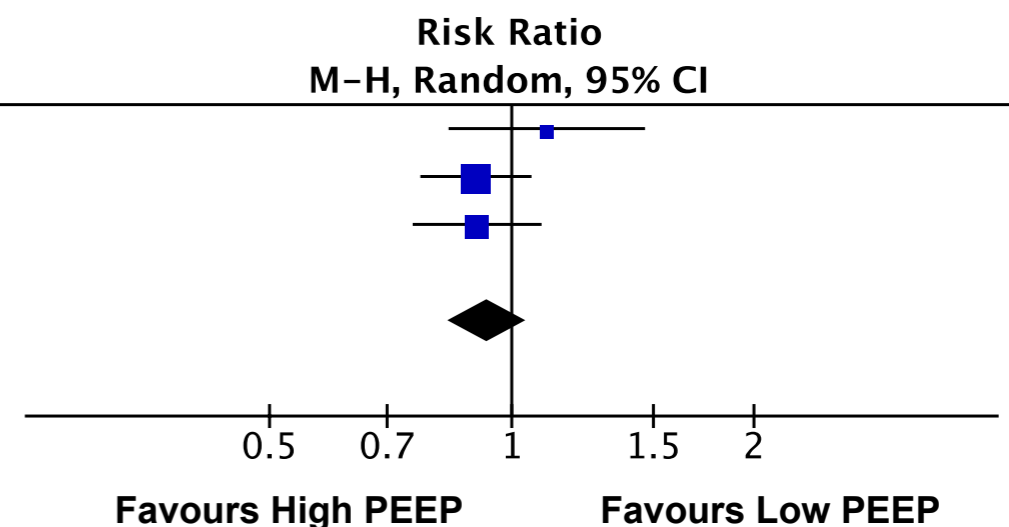

## Barotrauma

| Study or Subgroup                                                                                        | High PEEP |             | Low PEEP |             | Weight        | Risk Ratio<br>M-H, Random, 95% CI |
|----------------------------------------------------------------------------------------------------------|-----------|-------------|----------|-------------|---------------|-----------------------------------|
|                                                                                                          | Events    | Total       | Events   | Total       |               |                                   |
| Amato1998                                                                                                | 2         | 29          | 10       | 24          | 6.3%          | 0.17 [0.04, 0.68]                 |
| Brower2004                                                                                               | 30        | 276         | 27       | 273         | 26.6%         | 1.10 [0.67, 1.80]                 |
| Huh2009                                                                                                  | 3         | 30          | 3        | 27          | 5.6%          | 0.90 [0.20, 4.09]                 |
| Meade2008                                                                                                | 53        | 475         | 47       | 508         | 32.8%         | 1.21 [0.83, 1.75]                 |
| Mercat2008                                                                                               | 26        | 385         | 22       | 382         | 23.9%         | 1.17 [0.68, 2.03]                 |
| Villar2006                                                                                               | 2         | 50          | 4        | 45          | 4.8%          | 0.45 [0.09, 2.34]                 |
| <b>Total (95% CI)</b>                                                                                    |           | <b>1245</b> |          | <b>1259</b> | <b>100.0%</b> | <b>0.97 [0.66, 1.42]</b>          |
| Total events                                                                                             | 116       |             | 113      |             |               |                                   |
| Heterogeneity: Tau <sup>2</sup> = 0.08; Chi <sup>2</sup> = 8.33, df = 5 (P = 0.14); I <sup>2</sup> = 40% |           |             |          |             |               |                                   |
| Test for overall effect: Z = 0.17 (P = 0.87)                                                             |           |             |          |             |               |                                   |

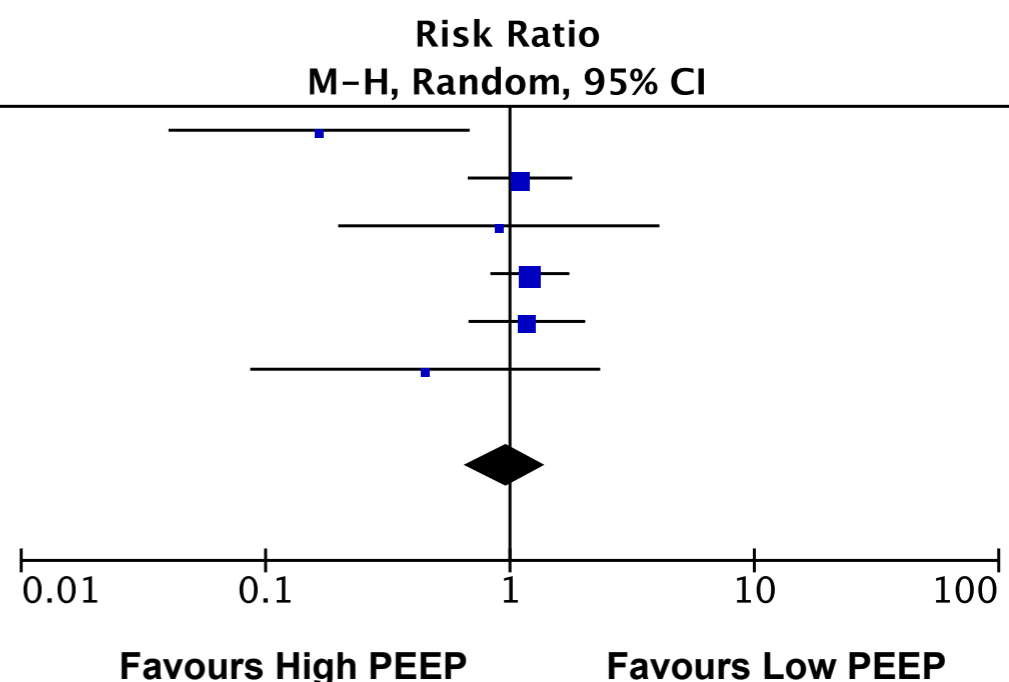

## VFD

| Study or Subgroup                                                                                          | High PEEP |      |            | Low PEEP |      |            | Weight        | Mean Difference<br>IV, Random, 95% CI |
|------------------------------------------------------------------------------------------------------------|-----------|------|------------|----------|------|------------|---------------|---------------------------------------|
|                                                                                                            | Mean      | SD   | Total      | Mean     | SD   | Total      |               |                                       |
| Brower2004                                                                                                 | 13.8      | 10.6 | 276        | 14.5     | 10.4 | 273        | 53.7%         | -0.70 [-2.46, 1.06]                   |
| Villar2006                                                                                                 | 10.9      | 9.4  | 50         | 6        | 7.9  | 45         | 46.3%         | 4.90 [1.42, 8.38]                     |
| <b>Total (95% CI)</b>                                                                                      |           |      | <b>326</b> |          |      | <b>318</b> | <b>100.0%</b> | <b>1.89 [-3.58, 7.36]</b>             |
| Heterogeneity: Tau <sup>2</sup> = 13.70; Chi <sup>2</sup> = 7.92, df = 1 (P = 0.005); I <sup>2</sup> = 87% |           |      |            |          |      |            |               |                                       |
| Test for overall effect: Z = 0.68 (P = 0.50)                                                               |           |      |            |          |      |            |               |                                       |

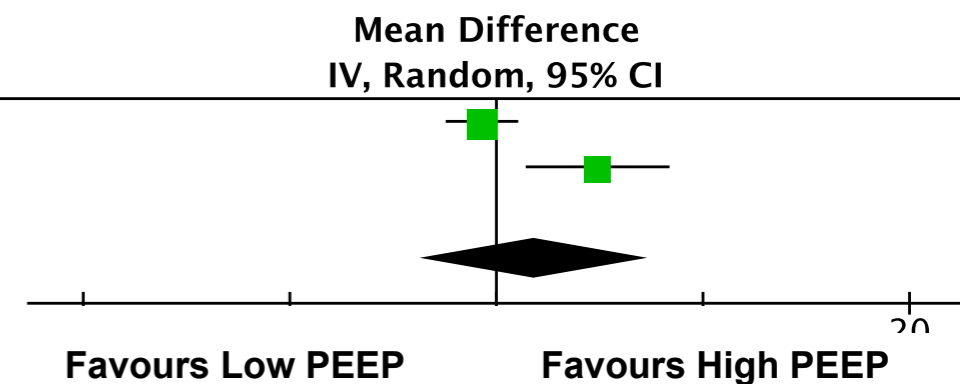

subgroup analysis  
Short term mortality (All RCTs)

| Study or Subgroup     | High PEEP   |       | Low PEEP    |       | Weight        | Risk Ratio               |
|-----------------------|-------------|-------|-------------|-------|---------------|--------------------------|
|                       | Events      | Total | Events      | Total |               | M-H, Random, 95% CI      |
| Talmor2008            | 5           | 30    | 12          | 31    | 2.8%          | 0.43 [0.17, 1.07]        |
| Villar2006            | 16          | 50    | 24          | 45    | 8.6%          | 0.60 [0.37, 0.98]        |
| Amato1998             | 13          | 29    | 17          | 24    | 8.8%          | 0.63 [0.39, 1.02]        |
| Meade2008             | 173         | 475   | 205         | 508   | 29.7%         | 0.90 [0.77, 1.06]        |
| Mercat2008            | 136         | 385   | 149         | 382   | 27.0%         | 0.91 [0.75, 1.09]        |
| Brower2004            | 76          | 276   | 68          | 273   | 18.3%         | 1.11 [0.83, 1.46]        |
| Huh2009               | 12          | 30    | 9           | 27    | 4.8%          | 1.20 [0.60, 2.39]        |
| <b>Total (95% CI)</b> | <b>1275</b> |       | <b>1290</b> |       | <b>100.0%</b> | <b>0.87 [0.74, 1.02]</b> |

Total events 431 484  
Heterogeneity:  $\tau^2 = 0.02$ ;  $\chi^2 = 9.96$ ,  $df = 6$  ( $P = 0.13$ );  $I^2 = 40\%$   
Test for overall effect:  $Z = 1.70$  ( $P = 0.09$ )

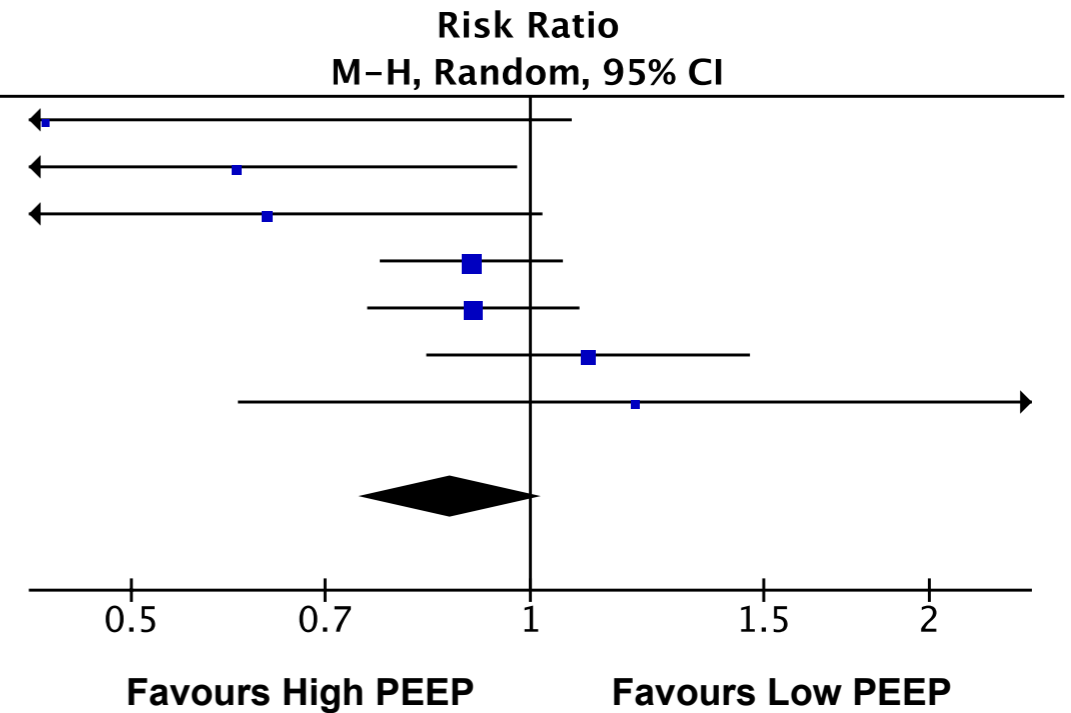

subgroup analysis  
Short term mortality (All RCTs)  
patients with P/F ratio  $\leq 200$

| Study or Subgroup     | High PEEP  |       | Low PEEP   |       | Weight        | Risk Ratio               |
|-----------------------|------------|-------|------------|-------|---------------|--------------------------|
|                       | Events     | Total | Events     | Total |               | M-H, Random, 95% CI      |
| Amato1998             | 13         | 29    | 17         | 24    | 5.8%          | 0.63 [0.39, 1.02]        |
| Brower2004            | 0          | 0     | 0          | 0     |               | Not estimable            |
| Huh2009               | 14         | 30    | 15         | 27    | 5.1%          | 0.84 [0.50, 1.40]        |
| Meade2008             | 155        | 408   | 187        | 419   | 49.5%         | 0.85 [0.72, 1.00]        |
| Mercat2008            | 114        | 323   | 132        | 318   | 34.1%         | 0.85 [0.70, 1.04]        |
| Talmor2008            | 0          | 0     | 0          | 0     |               | Not estimable            |
| Villar2006            | 16         | 50    | 24         | 45    | 5.6%          | 0.60 [0.37, 0.98]        |
| <b>Total (95% CI)</b> | <b>840</b> |       | <b>833</b> |       | <b>100.0%</b> | <b>0.82 [0.73, 0.92]</b> |

Total events 312 375  
Heterogeneity:  $\tau^2 = 0.00$ ;  $\chi^2 = 3.04$ ,  $df = 4$  ( $P = 0.55$ );  $I^2 = 0\%$   
Test for overall effect:  $Z = 3.39$  ( $P = 0.0007$ )

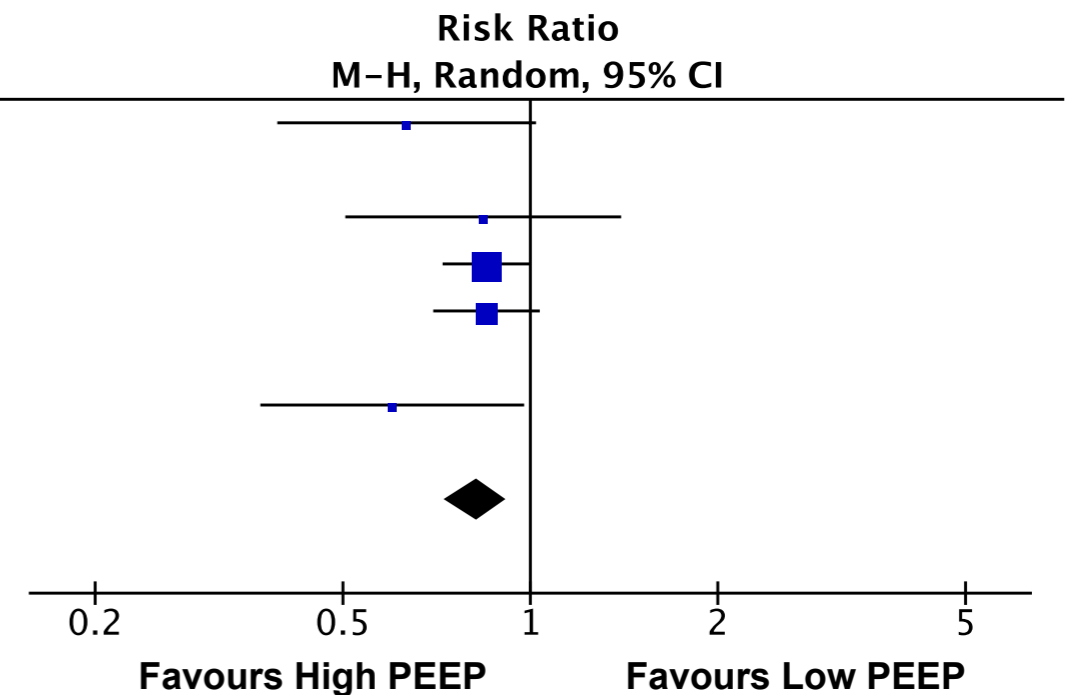

## subgroup analysis

Short term mortality (RCTs were excluded, if other than PEEP might influence the study outcome)  
patients with P/F ratio  $\leq 200$

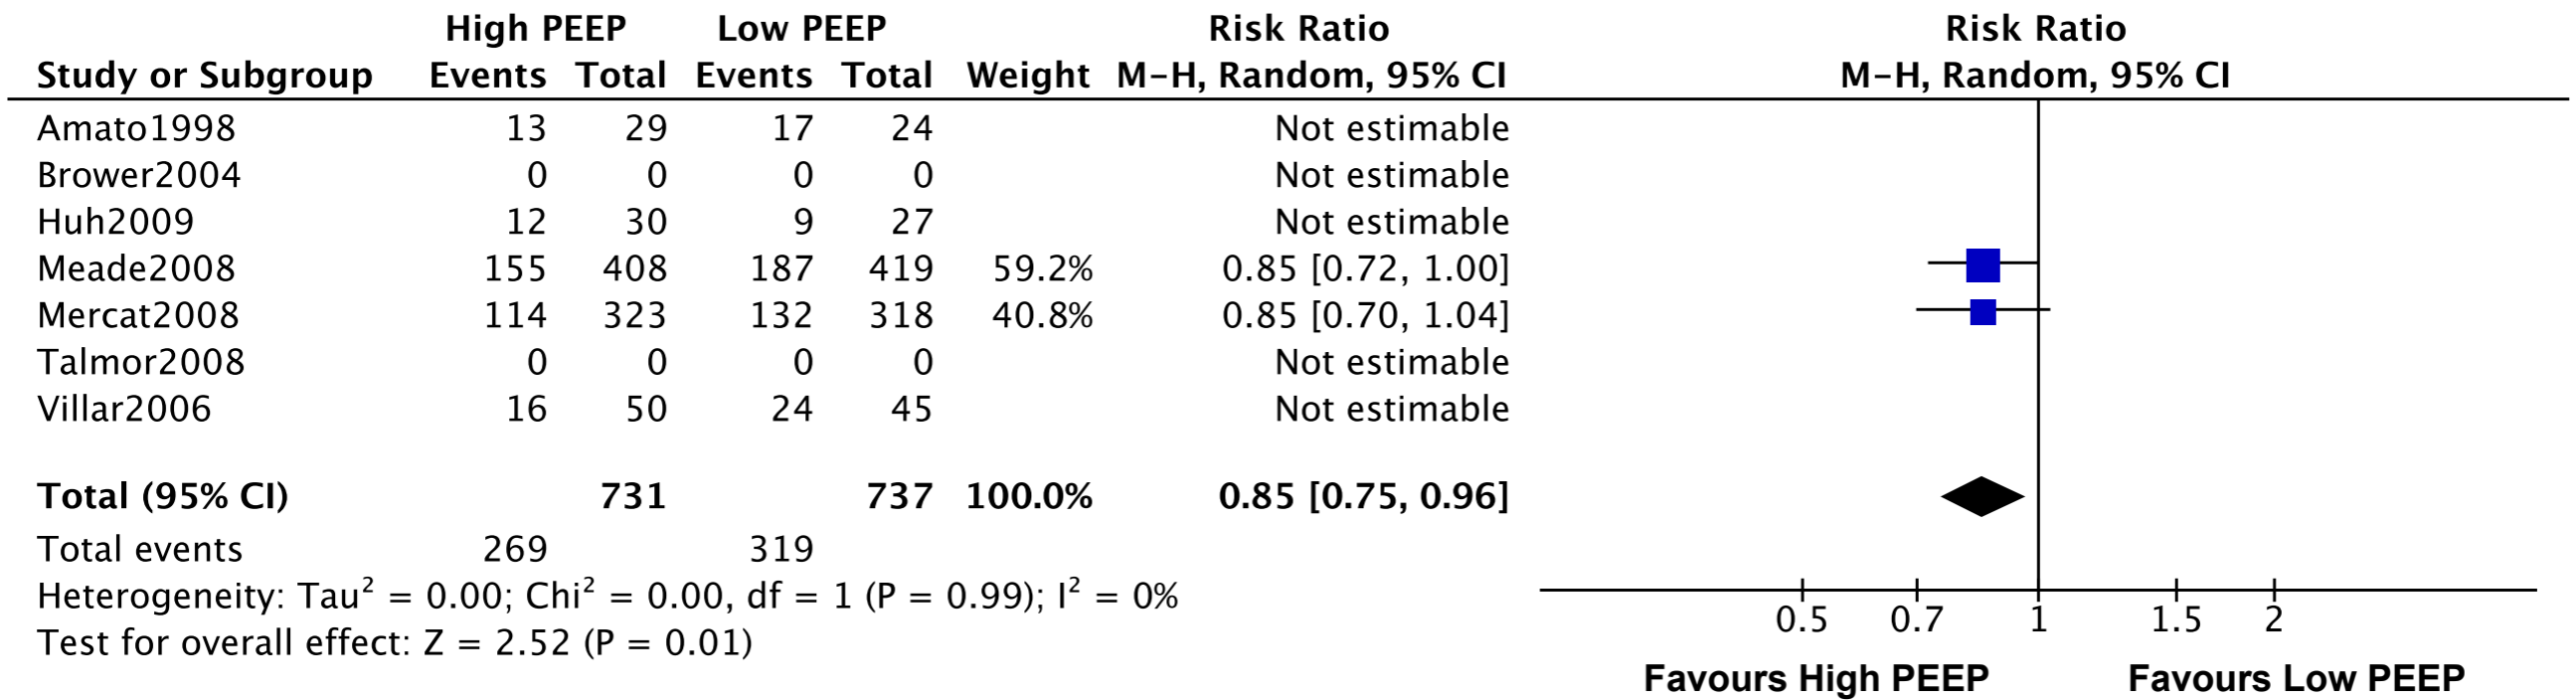

## Summary of findings

### High compared to low PEEP for ARDS patients

**Setting :**

**Intervention :** high PEEP

**Comparison :** low PEEP

| Outcomes           | Anticipated absolute effects (95% CI) |                                               | Relative effect (95% CI)        | No of participants (studies) | Quality of the evidence (GRADE) | Comments |
|--------------------|---------------------------------------|-----------------------------------------------|---------------------------------|------------------------------|---------------------------------|----------|
|                    | Risk with low PEEP                    | Risk with high PEEP                           |                                 |                              |                                 |          |
| Hospital mortality | <b>Study population</b>               |                                               | <b>RR 0.93</b><br>(0.83 - 1.04) | 2299<br>(3 RCTs)             | ⊕⊕⊕○<br>MODERATE <sup>1</sup>   |          |
|                    | 363 / 1000                            | <b>337 / 1000</b><br>(301 - 377)              |                                 |                              |                                 |          |
|                    | <b>Low</b>                            |                                               |                                 |                              |                                 |          |
|                    | 380 / 1000                            | <b>353 / 1000</b><br>(315 - 395)              |                                 |                              |                                 |          |
|                    | <b>High</b>                           |                                               |                                 |                              |                                 |          |
|                    | 560 / 1000                            | <b>521 / 1000</b><br>(465 - 582)              |                                 |                              |                                 |          |
| Barotrauma         | <b>Study population</b>               |                                               | <b>RR 0.97</b><br>(0.66 - 1.42) | 2504<br>(6 RCTs)             | ⊕⊕⊕○<br>MODERATE <sup>1</sup>   |          |
|                    | 90 / 1000                             | <b>87 / 1000</b><br>(59 - 127)                |                                 |                              |                                 |          |
|                    | <b>Low</b>                            |                                               |                                 |                              |                                 |          |
|                    | 38 / 1000                             | <b>37 / 1000</b><br>(25 - 54)                 |                                 |                              |                                 |          |
|                    | <b>High</b>                           |                                               |                                 |                              |                                 |          |
|                    | 120 / 1000                            | <b>116 / 1000</b><br>(79 - 170)               |                                 |                              |                                 |          |
| VFD                | Mean 10.56 days                       | 1.89 days more MD<br>(3.58 fewer - 7.36 more) | -                               | 644<br>(2 RCTs)              | ⊕⊕⊕○<br>MODERATE <sup>2</sup>   |          |

\*The risk in the intervention group (and its 95% confidence interval) is based on the assumed risk in the comparison group and the relative effect of the intervention (and its 95% CI).

CI: Confidence interval; RR: Risk ratio ; MD: Mean difference

#### GRADE Working Group grades of evidence

**High quality:** We are very confident that the true effect lies close to that of the estimate of the effect

**Moderate quality:** We are moderately confident in the effect estimate: The true effect is likely to be close to the estimate of the effect, but there is a possibility that it is substantially different

**Low quality:** Our confidence in the effect estimate is limited: The true effect may be substantially different from the estimate of the effect

**Very low quality:** We have very little confidence in the effect estimate: The true effect is likely to be substantially different from the estimate of effect

1. Three trials were stopped early based on pre-specified efficacy stopping criteria.
2. The heterogeneity is significant with  $I^2=87\%$ ,  $p=0.005$ .



**CQ5:**

**Question:** How should positive end-expiratory pressure (PEEP) be set in adult patients with ARDS?

| Quality assessment   |                   |              |               |              |             |                      | No of patients   |                  | Effect                           |                                              | Quality            | Importance |
|----------------------|-------------------|--------------|---------------|--------------|-------------|----------------------|------------------|------------------|----------------------------------|----------------------------------------------|--------------------|------------|
| No of studies        | Study design      | Risk of bias | Inconsistency | Indirectness | Imprecision | Other considerations | High PEEP        | Low PEEP         | relative (95% CI)                | absolute (95% CI)                            |                    |            |
| short term mortality |                   |              |               |              |             |                      |                  |                  |                                  |                                              |                    |            |
| 3                    | randomized trials | serious1     | not serious   | not serious  | not serious | none                 | 385/1136 (33.9%) | 422/1163 (36.3%) | <b>RR 0.93</b><br>(0.83 to 1.04) | 25 fewer per 1000 (from 15 more to 62 fewer) | ⊕⊕⊕○<br>MODERATE 1 | CRITICAL   |
|                      |                   |              |               |              |             |                      |                  | 38.0%            |                                  | 27 fewer per 1000 (from 15 more to 65 fewer) |                    |            |
|                      |                   |              |               |              |             |                      |                  | 56.0%            |                                  | 39 fewer per 1000 (from 22 more to 95 fewer) |                    |            |
| Barotrauma           |                   |              |               |              |             |                      |                  |                  |                                  |                                              |                    |            |
| 6                    | randomized trials | serious1     | not serious   | not serious  | not serious | none                 | 116/1245 (9.3%)  | 113/1259 (9.0%)  | <b>RR 0.97</b><br>(0.66 to 1.42) | 3 fewer per 1000 (from 38 more to 31 fewer)  | ⊕⊕⊕○<br>MODERATE 1 | IMPORTANT  |
|                      |                   |              |               |              |             |                      |                  | 3.8%             |                                  | 1 fewer per 1000 (from 16 more to 13 fewer)  |                    |            |
|                      |                   |              |               |              |             |                      |                  | 12.0%            |                                  | 4 fewer per 1000 (from 50 more to 41 fewer)  |                    |            |
| VFD                  |                   |              |               |              |             |                      |                  |                  |                                  |                                              |                    |            |
| 2                    | randomized trials | not serious  | serious2      | not serious  | not serious | none                 | 10.56            | 12.46            | -                                | MD 1.89 more (3.58 fewer to 7.36 more)       | ⊕⊕⊕○<br>MODERATE2  | IMPORTANT  |

MD- mean difference, RR-Relative risk

1. Three trials were stopped early based on pre-specified efficacy stopping rule.
2. The heterogeneity is significant with I<sup>2</sup>=87% p=0.005

10. Evidence-to-Decision table

**CQ5 : What is the optimal positive end-expiratory pressure (PEEP) in adult patients with ARDS?**

POPULATION : ADULT PATIENTS WITH ARDS

INTERVENTION : HIGH PEEP

| CRITERIA                                                                                        |                                                                                                                                                                                                                                                                                                                                                         | JUDGEMENT                                                                                                                                                                                                                | RESEARCH EVIDENCE                                                                                                                                                                                                                                                                                                                                                                                                                                                                                                                                                                                                          | ADDITIONAL CONSIDERATIONS                                        |                     |                                   |                               |          |                  |            |          |                  |                         |          |                  |  |
|-------------------------------------------------------------------------------------------------|---------------------------------------------------------------------------------------------------------------------------------------------------------------------------------------------------------------------------------------------------------------------------------------------------------------------------------------------------------|--------------------------------------------------------------------------------------------------------------------------------------------------------------------------------------------------------------------------|----------------------------------------------------------------------------------------------------------------------------------------------------------------------------------------------------------------------------------------------------------------------------------------------------------------------------------------------------------------------------------------------------------------------------------------------------------------------------------------------------------------------------------------------------------------------------------------------------------------------------|------------------------------------------------------------------|---------------------|-----------------------------------|-------------------------------|----------|------------------|------------|----------|------------------|-------------------------|----------|------------------|--|
| <b>PROBLEM</b>                                                                                  | Is the problem a priority?                                                                                                                                                                                                                                                                                                                              | <input type="radio"/> No<br><input type="radio"/> Probably no<br><input checked="" type="radio"/> Probably yes<br><input type="radio"/> Yes<br>-----<br><input type="radio"/> Varies<br><input type="radio"/> Don't know | It is well known that PEEP prevents atelectasis and improves oxygenation in patients undergoing mechanical ventilation. It has been suggested that PEEP not only improves oxygenation but also prevents ventilator-induced lung injury by recruiting alveoli collapsed by inflammation and exudative fluid in patients with ARDS.<br>The priority of this issue is thought to be high although the optimal PEEP level is undefined.                                                                                                                                                                                        | See note 3 for the definitions of "higher PEEP" and "lower PEEP" |                     |                                   |                               |          |                  |            |          |                  |                         |          |                  |  |
|                                                                                                 | What is the overall certainty of the evidence of effects?                                                                                                                                                                                                                                                                                               | <input type="radio"/> Very low<br><input type="radio"/> Low<br><input checked="" type="radio"/> Moderate<br><input type="radio"/> High<br>-----<br><input type="radio"/> No included studies                             | <b>The relative importance or values of the main outcomes of interest:</b> <table border="1" style="width: 100%; border-collapse: collapse;"> <thead> <tr> <th style="width: 33%;">Outcome</th> <th style="width: 33%;">Relative importance</th> <th style="width: 33%;">Certainty of the evidence (GRADE)</th> </tr> </thead> <tbody> <tr> <td>Mortality<sup>(note 1)</sup></td> <td>Critical</td> <td>⊕⊕⊕○<br/>Moderate</td> </tr> <tr> <td>Barotrauma</td> <td>Critical</td> <td>⊕⊕⊕○<br/>Moderate</td> </tr> <tr> <td>VFD<sup>(note 2)</sup></td> <td>Critical</td> <td>⊕⊕⊕○<br/>Moderate</td> </tr> </tbody> </table> | Outcome                                                          | Relative importance | Certainty of the evidence (GRADE) | Mortality <sup>(note 1)</sup> | Critical | ⊕⊕⊕○<br>Moderate | Barotrauma | Critical | ⊕⊕⊕○<br>Moderate | VFD <sup>(note 2)</sup> | Critical | ⊕⊕⊕○<br>Moderate |  |
|                                                                                                 | Outcome                                                                                                                                                                                                                                                                                                                                                 | Relative importance                                                                                                                                                                                                      |                                                                                                                                                                                                                                                                                                                                                                                                                                                                                                                                                                                                                            | Certainty of the evidence (GRADE)                                |                     |                                   |                               |          |                  |            |          |                  |                         |          |                  |  |
| Mortality <sup>(note 1)</sup>                                                                   | Critical                                                                                                                                                                                                                                                                                                                                                | ⊕⊕⊕○<br>Moderate                                                                                                                                                                                                         |                                                                                                                                                                                                                                                                                                                                                                                                                                                                                                                                                                                                                            |                                                                  |                     |                                   |                               |          |                  |            |          |                  |                         |          |                  |  |
| Barotrauma                                                                                      | Critical                                                                                                                                                                                                                                                                                                                                                | ⊕⊕⊕○<br>Moderate                                                                                                                                                                                                         |                                                                                                                                                                                                                                                                                                                                                                                                                                                                                                                                                                                                                            |                                                                  |                     |                                   |                               |          |                  |            |          |                  |                         |          |                  |  |
| VFD <sup>(note 2)</sup>                                                                         | Critical                                                                                                                                                                                                                                                                                                                                                | ⊕⊕⊕○<br>Moderate                                                                                                                                                                                                         |                                                                                                                                                                                                                                                                                                                                                                                                                                                                                                                                                                                                                            |                                                                  |                     |                                   |                               |          |                  |            |          |                  |                         |          |                  |  |
| Is there important uncertainty about or variability in how much people value the main outcomes? | <input type="radio"/> Important uncertainty or variability<br><input type="radio"/> Possibly important uncertainty or variability<br><input type="radio"/> Possibly no important uncertainty or variability<br><input checked="" type="radio"/> No important uncertainty or variability<br>-----<br><input type="radio"/> No known undesirable outcomes |                                                                                                                                                                                                                          |                                                                                                                                                                                                                                                                                                                                                                                                                                                                                                                                                                                                                            |                                                                  |                     |                                   |                               |          |                  |            |          |                  |                         |          |                  |  |
| How substantial are the desirable anticipated effects?                                          | <input type="radio"/> Trivial<br><input type="radio"/> Small<br><input type="radio"/> Moderate<br><input type="radio"/> Large<br>-----                                                                                                                                                                                                                  |                                                                                                                                                                                                                          |                                                                                                                                                                                                                                                                                                                                                                                                                                                                                                                                                                                                                            |                                                                  |                     |                                   |                               |          |                  |            |          |                  |                         |          |                  |  |

|                                                                                                                                                                                                                                           | <ul style="list-style-type: none"> <li>●Varies</li> <li>○Don't know</li> </ul>                                                                                                                                                                                                                                             | <p><b>Summary of findings:</b></p> <table border="1"> <thead> <tr> <th>Outcome</th> <th>High PEEP</th> <th>Low PEEP</th> <th>Absolute effect (95% CI)</th> <th>Relative effect (RR) (95% CI)</th> </tr> </thead> <tbody> <tr> <td rowspan="3">Mortality</td> <td>363 / 1000</td> <td>337 / 1000<br/>(301 ~ 377)</td> <td>25 fewer per 1000 (from 15 more to 62 fewer)</td> <td rowspan="3"><b>RR 0.93</b><br/>(0.83 ~ 1.04)</td> </tr> <tr> <td>380 / 1000</td> <td>353 / 1000<br/>(315 ~ 395)</td> <td>27 fewer per 1000 (from 15 more to 65 fewer)</td> </tr> <tr> <td>560 / 1000</td> <td>521 / 1000<br/>(465 ~ 582)</td> <td>39 fewer per 1000 (from 22 more to 95 fewer)</td> </tr> <tr> <td rowspan="3">Barotrauma</td> <td>90 / 1000</td> <td>87 / 1000<br/>(59 ~ 127)</td> <td>3 fewer per 1000 (from 38 more to 31 fewer)</td> <td rowspan="3"><b>RR 0.97</b><br/>(0.66 ~ 1.42)</td> </tr> <tr> <td>38 / 1000</td> <td>37 / 1000<br/>(25 ~ 54)</td> <td>1 fewer per 1000 (from 16 more to 13 fewer)</td> </tr> <tr> <td>120 / 1000</td> <td>116 / 1000<br/>(79 ~ 170)</td> <td>4 fewer per 1000 (from 50 more to 41 fewer)</td> </tr> <tr> <td>VFD</td> <td>Average 10.56 days</td> <td>Average 12.46 days</td> <td><b>MD 1.89 more</b><br/>(3.58 fewer to 7.36 more)</td> <td></td> </tr> </tbody> </table> <p><b>Summary:</b> There are no differences in hospital mortality, incidence of barotrauma or ventilator-free days (VFD) comparing patient groups receiving higher PEEP and lower PEEP levels (hospital mortality RR 0.93; 95%CI 0.83-1.04, barotrauma RR 0.97; 95%CI 0.66-1.42, VFD 1.89 days more; 95%CI -3.58~7.36).</p> | Outcome                                          | High PEEP                       | Low PEEP                 | Absolute effect (95% CI)      | Relative effect (RR) (95% CI) | Mortality | 363 / 1000 | 337 / 1000<br>(301 ~ 377) | 25 fewer per 1000 (from 15 more to 62 fewer) | <b>RR 0.93</b><br>(0.83 ~ 1.04) | 380 / 1000 | 353 / 1000<br>(315 ~ 395) | 27 fewer per 1000 (from 15 more to 65 fewer) | 560 / 1000 | 521 / 1000<br>(465 ~ 582) | 39 fewer per 1000 (from 22 more to 95 fewer) | Barotrauma | 90 / 1000 | 87 / 1000<br>(59 ~ 127) | 3 fewer per 1000 (from 38 more to 31 fewer) | <b>RR 0.97</b><br>(0.66 ~ 1.42) | 38 / 1000 | 37 / 1000<br>(25 ~ 54) | 1 fewer per 1000 (from 16 more to 13 fewer) | 120 / 1000 | 116 / 1000<br>(79 ~ 170) | 4 fewer per 1000 (from 50 more to 41 fewer) | VFD | Average 10.56 days | Average 12.46 days | <b>MD 1.89 more</b><br>(3.58 fewer to 7.36 more) |  |
|-------------------------------------------------------------------------------------------------------------------------------------------------------------------------------------------------------------------------------------------|----------------------------------------------------------------------------------------------------------------------------------------------------------------------------------------------------------------------------------------------------------------------------------------------------------------------------|---------------------------------------------------------------------------------------------------------------------------------------------------------------------------------------------------------------------------------------------------------------------------------------------------------------------------------------------------------------------------------------------------------------------------------------------------------------------------------------------------------------------------------------------------------------------------------------------------------------------------------------------------------------------------------------------------------------------------------------------------------------------------------------------------------------------------------------------------------------------------------------------------------------------------------------------------------------------------------------------------------------------------------------------------------------------------------------------------------------------------------------------------------------------------------------------------------------------------------------------------------------------------------------------------------------------------------------------------------------------------------------------------------------------------------------------------------------------------------------------------------------------------------------------------------------------------------------------------------------------------------------------------|--------------------------------------------------|---------------------------------|--------------------------|-------------------------------|-------------------------------|-----------|------------|---------------------------|----------------------------------------------|---------------------------------|------------|---------------------------|----------------------------------------------|------------|---------------------------|----------------------------------------------|------------|-----------|-------------------------|---------------------------------------------|---------------------------------|-----------|------------------------|---------------------------------------------|------------|--------------------------|---------------------------------------------|-----|--------------------|--------------------|--------------------------------------------------|--|
|                                                                                                                                                                                                                                           | Outcome                                                                                                                                                                                                                                                                                                                    |                                                                                                                                                                                                                                                                                                                                                                                                                                                                                                                                                                                                                                                                                                                                                                                                                                                                                                                                                                                                                                                                                                                                                                                                                                                                                                                                                                                                                                                                                                                                                                                                                                                   | High PEEP                                        | Low PEEP                        | Absolute effect (95% CI) | Relative effect (RR) (95% CI) |                               |           |            |                           |                                              |                                 |            |                           |                                              |            |                           |                                              |            |           |                         |                                             |                                 |           |                        |                                             |            |                          |                                             |     |                    |                    |                                                  |  |
| Mortality                                                                                                                                                                                                                                 | 363 / 1000                                                                                                                                                                                                                                                                                                                 | 337 / 1000<br>(301 ~ 377)                                                                                                                                                                                                                                                                                                                                                                                                                                                                                                                                                                                                                                                                                                                                                                                                                                                                                                                                                                                                                                                                                                                                                                                                                                                                                                                                                                                                                                                                                                                                                                                                                         | 25 fewer per 1000 (from 15 more to 62 fewer)     | <b>RR 0.93</b><br>(0.83 ~ 1.04) |                          |                               |                               |           |            |                           |                                              |                                 |            |                           |                                              |            |                           |                                              |            |           |                         |                                             |                                 |           |                        |                                             |            |                          |                                             |     |                    |                    |                                                  |  |
|                                                                                                                                                                                                                                           | 380 / 1000                                                                                                                                                                                                                                                                                                                 | 353 / 1000<br>(315 ~ 395)                                                                                                                                                                                                                                                                                                                                                                                                                                                                                                                                                                                                                                                                                                                                                                                                                                                                                                                                                                                                                                                                                                                                                                                                                                                                                                                                                                                                                                                                                                                                                                                                                         | 27 fewer per 1000 (from 15 more to 65 fewer)     |                                 |                          |                               |                               |           |            |                           |                                              |                                 |            |                           |                                              |            |                           |                                              |            |           |                         |                                             |                                 |           |                        |                                             |            |                          |                                             |     |                    |                    |                                                  |  |
|                                                                                                                                                                                                                                           | 560 / 1000                                                                                                                                                                                                                                                                                                                 | 521 / 1000<br>(465 ~ 582)                                                                                                                                                                                                                                                                                                                                                                                                                                                                                                                                                                                                                                                                                                                                                                                                                                                                                                                                                                                                                                                                                                                                                                                                                                                                                                                                                                                                                                                                                                                                                                                                                         | 39 fewer per 1000 (from 22 more to 95 fewer)     |                                 |                          |                               |                               |           |            |                           |                                              |                                 |            |                           |                                              |            |                           |                                              |            |           |                         |                                             |                                 |           |                        |                                             |            |                          |                                             |     |                    |                    |                                                  |  |
| Barotrauma                                                                                                                                                                                                                                | 90 / 1000                                                                                                                                                                                                                                                                                                                  | 87 / 1000<br>(59 ~ 127)                                                                                                                                                                                                                                                                                                                                                                                                                                                                                                                                                                                                                                                                                                                                                                                                                                                                                                                                                                                                                                                                                                                                                                                                                                                                                                                                                                                                                                                                                                                                                                                                                           | 3 fewer per 1000 (from 38 more to 31 fewer)      | <b>RR 0.97</b><br>(0.66 ~ 1.42) |                          |                               |                               |           |            |                           |                                              |                                 |            |                           |                                              |            |                           |                                              |            |           |                         |                                             |                                 |           |                        |                                             |            |                          |                                             |     |                    |                    |                                                  |  |
|                                                                                                                                                                                                                                           | 38 / 1000                                                                                                                                                                                                                                                                                                                  | 37 / 1000<br>(25 ~ 54)                                                                                                                                                                                                                                                                                                                                                                                                                                                                                                                                                                                                                                                                                                                                                                                                                                                                                                                                                                                                                                                                                                                                                                                                                                                                                                                                                                                                                                                                                                                                                                                                                            | 1 fewer per 1000 (from 16 more to 13 fewer)      |                                 |                          |                               |                               |           |            |                           |                                              |                                 |            |                           |                                              |            |                           |                                              |            |           |                         |                                             |                                 |           |                        |                                             |            |                          |                                             |     |                    |                    |                                                  |  |
|                                                                                                                                                                                                                                           | 120 / 1000                                                                                                                                                                                                                                                                                                                 | 116 / 1000<br>(79 ~ 170)                                                                                                                                                                                                                                                                                                                                                                                                                                                                                                                                                                                                                                                                                                                                                                                                                                                                                                                                                                                                                                                                                                                                                                                                                                                                                                                                                                                                                                                                                                                                                                                                                          | 4 fewer per 1000 (from 50 more to 41 fewer)      |                                 |                          |                               |                               |           |            |                           |                                              |                                 |            |                           |                                              |            |                           |                                              |            |           |                         |                                             |                                 |           |                        |                                             |            |                          |                                             |     |                    |                    |                                                  |  |
| VFD                                                                                                                                                                                                                                       | Average 10.56 days                                                                                                                                                                                                                                                                                                         | Average 12.46 days                                                                                                                                                                                                                                                                                                                                                                                                                                                                                                                                                                                                                                                                                                                                                                                                                                                                                                                                                                                                                                                                                                                                                                                                                                                                                                                                                                                                                                                                                                                                                                                                                                | <b>MD 1.89 more</b><br>(3.58 fewer to 7.36 more) |                                 |                          |                               |                               |           |            |                           |                                              |                                 |            |                           |                                              |            |                           |                                              |            |           |                         |                                             |                                 |           |                        |                                             |            |                          |                                             |     |                    |                    |                                                  |  |
| <p><b>How substantial are the undesirable anticipated effects?</b></p> <ul style="list-style-type: none"> <li>○Large</li> <li>○Moderate</li> <li>○Small</li> <li>○Trivial</li> <li>-----</li> <li>○Varies</li> <li>●Don't know</li> </ul> | <ul style="list-style-type: none"> <li>○Favors the comparison</li> <li>○Probably favors the comparison</li> <li>○Does not favor either the intervention or the comparison</li> <li>○Probably favors the intervention</li> <li>○Favors the intervention</li> <li>-----</li> <li>●Varies</li> <li>○Don't know</li> </ul>     |                                                                                                                                                                                                                                                                                                                                                                                                                                                                                                                                                                                                                                                                                                                                                                                                                                                                                                                                                                                                                                                                                                                                                                                                                                                                                                                                                                                                                                                                                                                                                                                                                                                   |                                                  |                                 |                          |                               |                               |           |            |                           |                                              |                                 |            |                           |                                              |            |                           |                                              |            |           |                         |                                             |                                 |           |                        |                                             |            |                          |                                             |     |                    |                    |                                                  |  |
| RESOURCES REQUIRED                                                                                                                                                                                                                        | <p><b>How large are the resource requirements (costs)?</b></p> <ul style="list-style-type: none"> <li>○Large costs</li> <li>○Moderate costs</li> <li>●Negligible costs and savings</li> <li>○Moderate savings</li> <li>○Large savings</li> <li>-----</li> <li>○Varies</li> <li>○Don't know</li> </ul>                      | <p>The costs of increasing PEEP is negligible.</p>                                                                                                                                                                                                                                                                                                                                                                                                                                                                                                                                                                                                                                                                                                                                                                                                                                                                                                                                                                                                                                                                                                                                                                                                                                                                                                                                                                                                                                                                                                                                                                                                |                                                  |                                 |                          |                               |                               |           |            |                           |                                              |                                 |            |                           |                                              |            |                           |                                              |            |           |                         |                                             |                                 |           |                        |                                             |            |                          |                                             |     |                    |                    |                                                  |  |
|                                                                                                                                                                                                                                           | <p><b>Does the cost-effectiveness of the intervention favor the intervention or the comparison?</b></p> <ul style="list-style-type: none"> <li>○Favors the comparison</li> <li>○Probably favors the comparison</li> <li>○Does not favor either the intervention or the comparison</li> <li>○Probably favors the</li> </ul> | <p>As there is no difference in the number of VFD comparing groups receiving high and low PEEP, no differences in costs or resources are expected.</p>                                                                                                                                                                                                                                                                                                                                                                                                                                                                                                                                                                                                                                                                                                                                                                                                                                                                                                                                                                                                                                                                                                                                                                                                                                                                                                                                                                                                                                                                                            |                                                  |                                 |                          |                               |                               |           |            |                           |                                              |                                 |            |                           |                                              |            |                           |                                              |            |           |                         |                                             |                                 |           |                        |                                             |            |                          |                                             |     |                    |                    |                                                  |  |

|                      |                                                            |                                                                                                                                                                                                                                                                                            |                                                                            |  |
|----------------------|------------------------------------------------------------|--------------------------------------------------------------------------------------------------------------------------------------------------------------------------------------------------------------------------------------------------------------------------------------------|----------------------------------------------------------------------------|--|
|                      |                                                            | intervention<br><input type="radio"/> Favors the intervention<br>-----<br><input checked="" type="radio"/> Varies<br><input type="radio"/> No included studies                                                                                                                             |                                                                            |  |
| <b>EQUITY</b>        | <b>What would be the impact on health equity?</b>          | <input type="radio"/> Reduced<br><input type="radio"/> Probably reduced<br><input checked="" type="radio"/> Probably no impact<br><input type="radio"/> Probably increased<br><input type="radio"/> Increased<br>-----<br><input type="radio"/> Varies<br><input type="radio"/> Don't know | Special medical facilities or equipment are not required to increase PEEP. |  |
| <b>ACCEPTABILITY</b> | <b>Is the intervention acceptable to key stakeholders?</b> | <input type="radio"/> No<br><input type="radio"/> Probably no<br><input checked="" type="radio"/> Probably yes<br><input type="radio"/> Yes<br>-----<br><input type="radio"/> Varies<br><input type="radio"/> Don't know                                                                   |                                                                            |  |
| <b>FEASIBILITY</b>   | <b>Is the intervention feasible implement?</b>             | <input type="radio"/> No<br><input type="radio"/> Probably no<br><input type="radio"/> Probably yes<br><input checked="" type="radio"/> Yes<br>-----<br><input type="radio"/> Varies<br><input type="radio"/> Don't know                                                                   | Special medical facilities or equipment are not required to increase PEEP. |  |

## Recommendations

## CQ5 : What is the optimal positive end-expiratory pressure (PEEP) in adult patients with ARDS?

| Balance of consequences | Undesirable consequences <i>clearly outweigh</i> desirable consequences in most settings | Undesirable consequences <i>probably outweigh</i> desirable consequences in most settings | The balance between desirable and undesirable consequences is closely <i>balanced or uncertain</i> | Desirable consequences <i>probably outweigh</i> undesirable consequences in most settings | Desirable consequences <i>clearly outweigh</i> undesirable consequences in most settings |
|-------------------------|------------------------------------------------------------------------------------------|-------------------------------------------------------------------------------------------|----------------------------------------------------------------------------------------------------|-------------------------------------------------------------------------------------------|------------------------------------------------------------------------------------------|
| Judgement               | ○                                                                                        | ○                                                                                         | ●                                                                                                  | ○                                                                                         | ○                                                                                        |

| Type of recommendation | Strong recommendation against the intervention                                                                                                                                                                                                                                                                                                                                                                                                                                                                                                                                                                                                                                                                                                                                                                                                                                                                                                                                                                                                                                                                                                                                                                                                                                                                                                                                                                                                                                                                                                                                                                                                                                                                 | Conditional recommendation against the intervention | Conditional recommendation for either the intervention or the comparison | Conditional recommendation for the intervention |
|------------------------|----------------------------------------------------------------------------------------------------------------------------------------------------------------------------------------------------------------------------------------------------------------------------------------------------------------------------------------------------------------------------------------------------------------------------------------------------------------------------------------------------------------------------------------------------------------------------------------------------------------------------------------------------------------------------------------------------------------------------------------------------------------------------------------------------------------------------------------------------------------------------------------------------------------------------------------------------------------------------------------------------------------------------------------------------------------------------------------------------------------------------------------------------------------------------------------------------------------------------------------------------------------------------------------------------------------------------------------------------------------------------------------------------------------------------------------------------------------------------------------------------------------------------------------------------------------------------------------------------------------------------------------------------------------------------------------------------------------|-----------------------------------------------------|--------------------------------------------------------------------------|-------------------------------------------------|
| Judgement              | ○                                                                                                                                                                                                                                                                                                                                                                                                                                                                                                                                                                                                                                                                                                                                                                                                                                                                                                                                                                                                                                                                                                                                                                                                                                                                                                                                                                                                                                                                                                                                                                                                                                                                                                              | ○                                                   | ●                                                                        | ○                                               |
| Recommendation         | <p><b>We suggest using PEEP within the range of plateau pressures less than or equal to 30cmH<sub>2</sub>O, without compromising hemodynamics (Grade 2B, strength of recommendation “weak recommendation” / Quality of evidence “moderate”). We also suggest using higher PEEP levels in patients with moderate to severe ARDS (Grade 2B, Strength of recommendation “weak recommendation” / Quality of evidence “moderate”).</b></p> <p>●Supplementary statements: Increasing PEEP levels may result in high plateau pressures, hypotension or a decrease in tidal volume. Close monitoring of hemodynamics and other parameters is necessary when high PEEP levels are used.</p>                                                                                                                                                                                                                                                                                                                                                                                                                                                                                                                                                                                                                                                                                                                                                                                                                                                                                                                                                                                                                             |                                                     |                                                                          |                                                 |
| Justification          | <p><b>Question:</b> What is the optimal positive end-expiratory pressure (PEEP) in adult patients with ARDS?<br/> <b>Patients:</b> ADULT PATIENTS WITH ARDS<br/> <b>Interventions:</b> High PEEP<br/> <b>Comparison:</b> Low PEEP<br/> <b>Outcomes:</b> Short Term Mortality<sup>(note 1)</sup>、Barotrauma、VFD</p> <p><b>Summary of the evidence:</b> We conducted a systematic review and included seven randomized clinical trials, which show that there are no differences in hospital mortality, incidence of barotrauma or ventilator-free days (VFD) comparing patient groups receiving higher PEEP and lower PEEP levels (hospital mortality RR 0.93; 95%CI 0.83-1.04, barotrauma RR 0.97; 95%CI 0.66-1.42, VFD 1.89 days more; 95%CI -3.58~7.36). Only three trials (Brower2004、Meade2008、Mercat2008) were included in the analysis for hospital mortality because trials that had interventions with potential effects on the outcome other than PEEP in the experimental groups were excluded<sup>1-3</sup>.</p> <p><b>Quality of the evidence:</b> Among the seven studies included in this systematic review, five (Amato 1998, Brower 2004, Mercat 2008, Talmor 2008 and Villar 2006) were terminated early<sup>1, 3-6</sup> and three (Amato 1998, Talmor 2008 and Villar 2006) had inadequate sample sizes. Therefore, the overall quality of evidence for each outcome is considered “moderate” after downgrading by one level.</p> <p><b>Judgement of benefit and harm, resources and cost:</b> No obvious benefits or harms were identified. There are no direct effects on cost by changing ventilator settings. Hemodynamic changes due to high levels of PEEP needs to be monitored.</p> |                                                     |                                                                          |                                                 |

|                                                 |                                                                                                                                                                                                                                                                                                                                                                                                                                                                                                                                                                                                                                                                                                                                                                                                                                                                                                                                                                                                                                                                                                                                                                                                                                                                                                                                                                                                 |
|-------------------------------------------------|-------------------------------------------------------------------------------------------------------------------------------------------------------------------------------------------------------------------------------------------------------------------------------------------------------------------------------------------------------------------------------------------------------------------------------------------------------------------------------------------------------------------------------------------------------------------------------------------------------------------------------------------------------------------------------------------------------------------------------------------------------------------------------------------------------------------------------------------------------------------------------------------------------------------------------------------------------------------------------------------------------------------------------------------------------------------------------------------------------------------------------------------------------------------------------------------------------------------------------------------------------------------------------------------------------------------------------------------------------------------------------------------------|
|                                                 | <p><b>Recommendations:</b> We suggest using PEEP within the range of plateau pressures less than or equal to 30cmH<sub>2</sub>O, without compromising hemodynamics (Grade 2B, strength of recommendation “weak recommendation” / Quality of evidence “moderate”). We also suggest using higher PEEP levels in patients with moderate to severe ARDS (Grade 2B, Strength of recommendation “weak recommendation” / Quality of evidence “moderate”).</p> <p><b>Additional considerations:</b> In the panel discussion, the focus was on the higher level of PEEP in patients with moderate to severe ARDS. It was proposed that another panel discussion be held after adding a subgroup analysis including only patients with moderate to severe ARDS. Since the subgroup analysis did not show a significant difference in mortality comparing higher and lower PEEP levels, the recommendation not to use a higher PEEP level routinely was suggested. However, because the PEEP levels used in the lower PEEP groups in Brower 2004, Meade 2008, and Mercat 2008 were not “low” in general, some panelists raised the concern that the recommendation may lead to ventilator settings with unnecessarily low PEEP and there was no consensus to accept the recommendation during the second panel discussion. The final version was approved through an email discussion among panelists.</p> |
| <b>Subgroup considerations</b>                  | A subgroup analysis comparing the mortality rate of higher PEEP and lower PEEP groups in patients with moderate to severe ARDS (P/F ≤200) showed a significantly lower hospital mortality in the higher PEEP group in both analyses in all trials and the analysis excluding trials that had interventions other than PEEP in experimental groups (RR 0.82, 95%CI 0.73~0.92、RR 0.85, 95%CI 0.75~0.96 respectively).                                                                                                                                                                                                                                                                                                                                                                                                                                                                                                                                                                                                                                                                                                                                                                                                                                                                                                                                                                             |
| <b>Implementation considerations</b>            | The panel meeting concluded that it is appropriate to use the FiO <sub>2</sub> /PEEP ladder used in ARDSnetwork 2000 and Brower 2004 to determine the PEEP level required at present <sup>7</sup> , as there are no other methods shown to be more practical or better to determine the optimal PEEP level.                                                                                                                                                                                                                                                                                                                                                                                                                                                                                                                                                                                                                                                                                                                                                                                                                                                                                                                                                                                                                                                                                     |
| <b>Monitoring and evaluation considerations</b> | Monitoring of indices related to mechanical ventilation such as oxygenation, ventilation, pressures and volumes is important. High PEEP requires careful monitoring of hemodynamic status.                                                                                                                                                                                                                                                                                                                                                                                                                                                                                                                                                                                                                                                                                                                                                                                                                                                                                                                                                                                                                                                                                                                                                                                                      |
| <b>Research possibilities</b>                   | It is necessary to identify which subgroups benefit from lower PEEP or higher PEEP. Further studies are also required to compare methods to determine the optimal PEEP level for individual patients, rather than compare lower and higher PEEP levels.                                                                                                                                                                                                                                                                                                                                                                                                                                                                                                                                                                                                                                                                                                                                                                                                                                                                                                                                                                                                                                                                                                                                         |

Note 1) We used 28-day mortality or ICU mortality as “short term mortality”.

Note 2) VFD means the number of days free from mechanical ventilation during the initial 28 days. If the patient expired within 28 days, VFD was counted as zero.

Note 3) : The definitions of “higher PEEP” and “lower PEEP”

Each RCT has its own definitions of “higher PEEP” and “lower PEEP”. The definitions of “higher PEEP” and “lower PEEP” in the RCTs included in this systematic review are as follows.

Brower2004 : The PEEP level is predetermined for each required FiO<sub>2</sub> level. PEEP levels in the higher PEEP group are set higher than those in the lower PEEP group for each required FiO<sub>2</sub> (See Part 1 section 9 in published version).

Meade2008 : The PEEP level is predetermined for each required FiO<sub>2</sub> level. PEEP levels in the higher PEEP group are set higher than those in the lower PEEP group for each required FiO<sub>2</sub>.

PEEP ladder used in lower PEEP group

CQ05 Evidence-to-Decision table

|                               |     |     |     |     |     |     |     |     |     |     |     |     |     |     |     |     |     |
|-------------------------------|-----|-----|-----|-----|-----|-----|-----|-----|-----|-----|-----|-----|-----|-----|-----|-----|-----|
| F <sub>I</sub> O <sub>2</sub> | 0.3 | 0.4 | 0.4 | 0.5 | 0.5 | 0.6 | 0.7 | 0.7 | 0.7 | 0.8 | 0.9 | 0.9 | 0.9 | 1.0 | 1.0 | 1.0 | 1.0 |
| PEEP                          | 5   | 5   | 8   | 8   | 10  | 10  | 10  | 12  | 14  | 14  | 14  | 16  | 18  | 18  | 20  | 22  | 24  |

PEEP ladder used in higher PEEP group

|                               |     |     |     |     |     |     |         |     |     |       |
|-------------------------------|-----|-----|-----|-----|-----|-----|---------|-----|-----|-------|
| F <sub>I</sub> O <sub>2</sub> | 0.3 | 0.3 | 0.4 | 0.4 | 0.5 | 0.5 | 0.5-0.8 | 0.8 | 0.9 | 1.0   |
| PEEP                          | 12  | 14  | 14  | 16  | 16  | 18  | 20      | 22  | 22  | 22-24 |

The two FiO<sub>2</sub>/PEEP ladders above are based on the ladder used in the ARMA study <sup>7</sup>.

Mercat2008 : PEEP was set at 5-9 cmH<sub>2</sub>O in the lower PEEP group and it set to reach a plateau pressure of 28 to 30 cm H<sub>2</sub>O

1. Brower RG, Lanken PN, MacIntyre N, et al. Higher versus lower positive end-expiratory pressures in patients with the acute respiratory distress syndrome. *N Engl J Med* **351**(4): 327-36, 2004. PMID 15269312
2. Meade MO, Cook DJ, Guyatt GH, et al. Ventilation strategy using low tidal volumes, recruitment maneuvers, and high positive end-expiratory pressure for acute lung injury and acute respiratory distress syndrome: a randomized controlled trial. *JAMA* **299**(6): 637-45, 2008. PMID 18270352
3. Mercat A, Richard JC, Vielle B, et al. Positive end-expiratory pressure setting in adults with acute lung injury and acute respiratory distress syndrome: a randomized controlled trial. *JAMA* **299**(6): 646-55, 2008. PMID 18270353
4. Amato MB, Barbas CS, Medeiros DM, et al. Effect of a protective-ventilation strategy on mortality in the acute respiratory distress syndrome. *N Engl J Med* **338**(6): 347-54, 1998. PMID 9449727
5. Talmor D, Sarge T, Malhotra A, et al. Mechanical ventilation guided by esophageal pressure in acute lung injury. *N Engl J Med* **359**(20): 2095-104, 2008. PMID 19001507
6. Villar J, Kacmarek RM, Perez-Mendez L, et al. A high positive end-expiratory pressure, low tidal volume ventilatory strategy improves outcome in persistent acute respiratory distress syndrome: a randomized, controlled trial. *Crit Care Med* **34**(5): 1311-8, 2006. PMID 16557151
7. ARDS Network. Ventilation with lower tidal volumes as compared with traditional tidal volumes for acute lung injury and the acute respiratory distress syndrome. The Acute Respiratory Distress Syndrome Network. *N Engl J Med* **342**(18): 1301-8, 2000. PMID 10793162





## CQ06. Study flow diagram

\*This CQ was partly evaluated by Blackwood using Cochrane database (to Feb 2014)<sup>1</sup>. We also searched literature from 2014 to May 2015.

Blackwood B, Burns KE, Cardwell CR, et al. Protocolized versus non-protocolized weaning for reducing the duration of mechanical ventilation in critically ill adult patients. *Cochrane Database Syst Rev* 11: CD006904, 2014. PMID 25375085

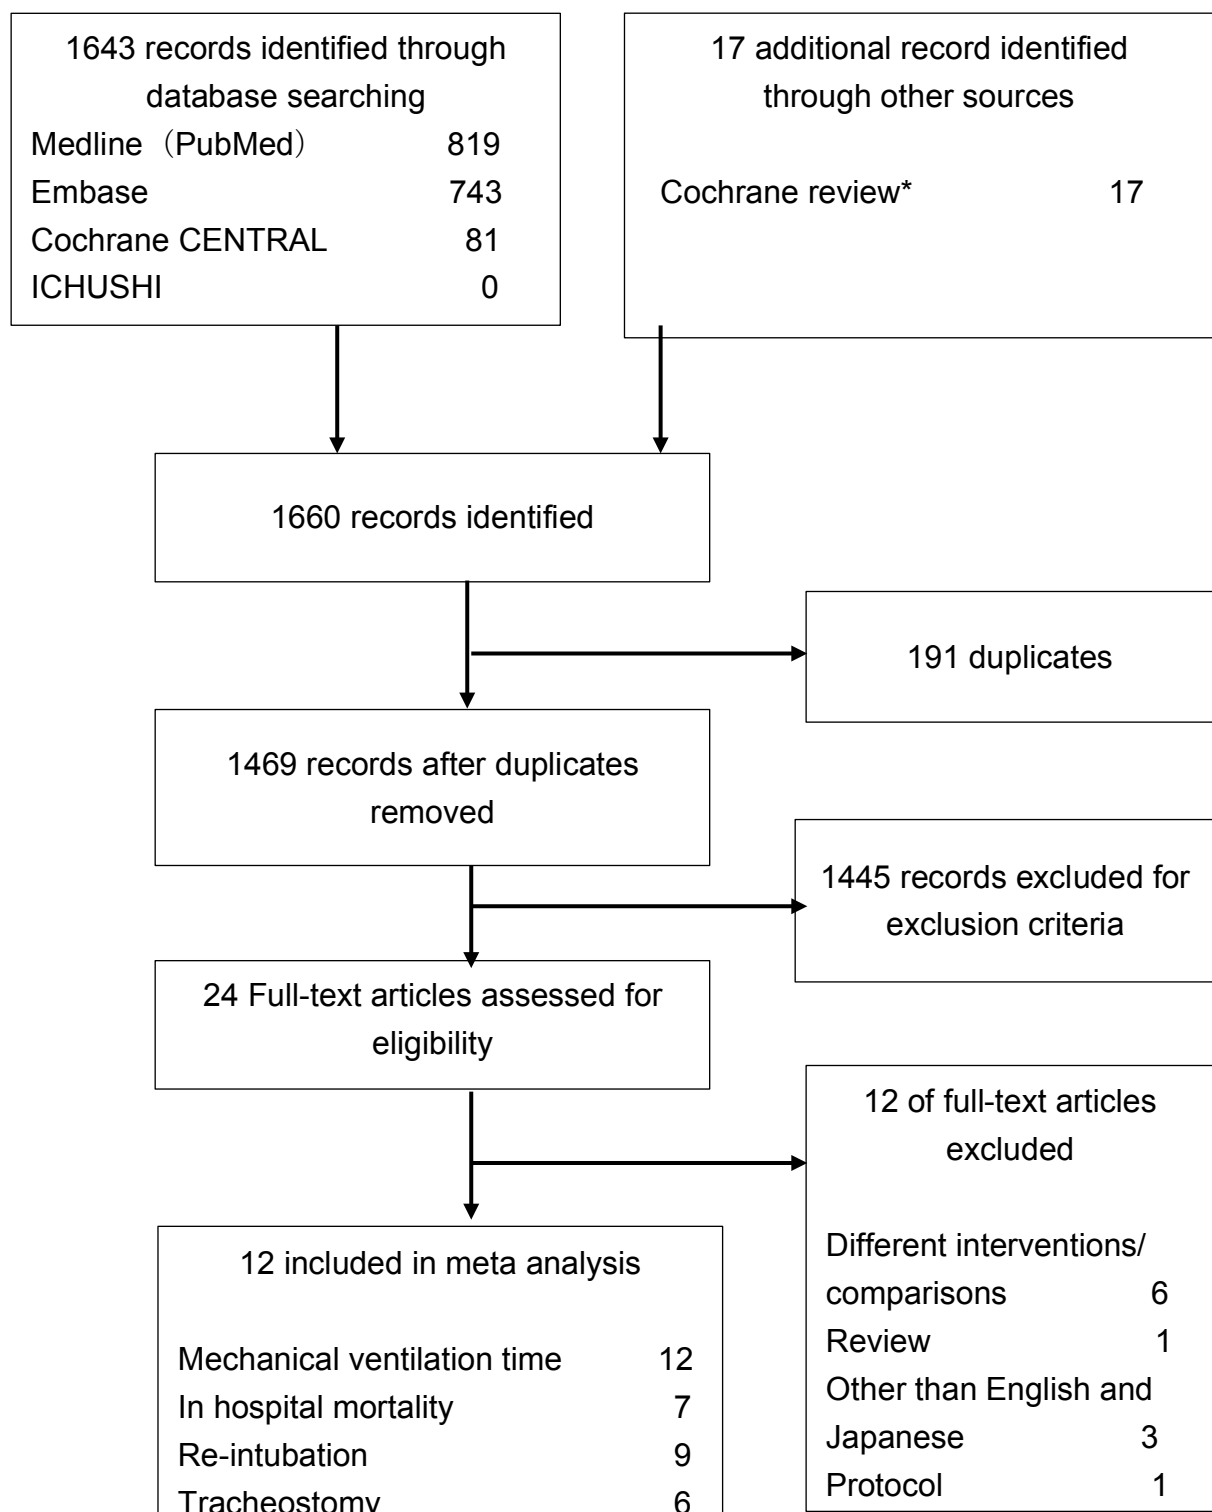

| Outcome |                            | Total duration of MV                      |                                    | risk of bias                              |                               | not serious (0)                         |                                              |                                   |                                              |
|---------|----------------------------|-------------------------------------------|------------------------------------|-------------------------------------------|-------------------------------|-----------------------------------------|----------------------------------------------|-----------------------------------|----------------------------------------------|
| 番号      | 著者名 発表年<br>(Forest plot表示) | risk of bias評価                            |                                    |                                           |                               |                                         |                                              |                                   |                                              |
|         |                            | ランダム割付順序の生成<br>random sequence generation | 割り付けの隠蔽化<br>allocation concealment | ブラインド<br>blinding                         |                               | 不完全なアウトカムデータ<br>incomplete outcome data | 選択されたアウトカムの報告<br>selective outcome reporting | その他のバイアス<br>Other sources of bias | 研究内でのバイアスのリスク<br>Risk of bias within a study |
|         |                            |                                           |                                    | 研究参加者と治療提供者<br>participants and personnel | アウトカム評価者<br>outcome assessors |                                         |                                              |                                   |                                              |
| 1       | Chaiwat 2010               | Low risk                                  | Unclear risk                       | High risk                                 | Low risk                      | Low risk                                | Unclear risk                                 | High risk                         | Unclear risk                                 |
| 2       | Ely 1996                   | Low risk                                  | Low risk                           | High risk                                 | Low risk                      | Low risk                                | Low risk                                     | Low risk                          | Low risk                                     |
| 3       | Kollef 1997                | Low risk                                  | Unclear risk                       | High risk                                 | Low risk                      | Low risk                                | Low risk                                     | Low risk                          | Low risk                                     |
| 4       | Krishnan 2004              | High risk                                 | High risk                          | High risk                                 | Low risk                      | Low risk                                | Low risk                                     | Low risk                          | Unclear risk                                 |
| 5       | Marelich 2000              | Low risk                                  | Low risk                           | High risk                                 | Low risk                      | Low risk                                | Low risk                                     | Low risk                          | Low risk                                     |
| 6       | Namen 2001                 | Unclear risk                              | Unclear risk                       | High risk                                 | Low risk                      | Low risk                                | Low risk                                     | Unclear risk                      | Low risk                                     |
| 7       | Navalesi 2008              | Unclear risk                              | Unclear risk                       | High risk                                 | Low risk                      | Low risk                                | Low risk                                     | Low risk                          | Low risk                                     |
| 8       | Roh 2012                   | Low risk                                  | Low risk                           | High risk                                 | Low risk                      | Unclear risk                            | Unclear risk                                 | Low risk                          | Low risk                                     |
| 9       | Rose 2008                  | Low risk                                  | Unclear risk                       | High risk                                 | Low risk                      | Low risk                                | Low risk                                     | Low risk                          | Low risk                                     |
| 10      | Simeone 2002               | Unclear risk                              | Unclear risk                       | High risk                                 | Low risk                      | Unclear risk                            | Unclear risk                                 | Unclear risk                      | Unclear risk                                 |
| 11      | Stahl 2009                 | Low risk                                  | Unclear risk                       | High risk                                 | Low risk                      | Low risk                                | Low risk                                     | Unclear risk                      | Low risk                                     |
|         |                            |                                           |                                    |                                           |                               |                                         |                                              |                                   |                                              |
| 番号      | 著者名 発表年<br>(Forest plot表示) | risk of biasコメント                          |                                    |                                           |                               |                                         |                                              |                                   |                                              |
| 1       | Chaiwat 2010               | ブロック無作為                                   | Opaque envelopeだがブロック無作為のため        | 盲検化は不可能                                   | 盲検化しなくても評価に影響なし               | データの欠損なし                                | 研究プロトコルが利用できないため、情報が不十分(死亡率もない)              | 有意な結果で早期中止                        | low3項目、high2項目                               |
| 2       | Ely 1996                   | コンピュータを使用                                 | opaque envelope                    | 盲検化は不可能                                   | 盲検化しなくても評価に影響なし               | データ欠損なし                                 | 期待アウトカム含む プロトコル記載あり                          | 特になし                              | low6項目、high1項目                               |
| 3       | Kollef 1997                | ブロック無作為のため                                | ブロックのため                            | 盲検化は不可能                                   | 盲検化しなくても評価に影響なし               | データ欠損なし                                 | 期待アウトカム含む、プロトコル記載あり                          | 特になし                              | low5項目、high1項目                               |
| 4       | Krishnan 2004              | 病院での番号が偶数が奇数かで割り付け                        | 偶数が奇数かなので予想可能                      | 盲検化は不可能                                   | 盲検化しなくても評価に影響なし               | データ欠損なし                                 | 研究プロトコル入手可能、期待アウトカム含む                        | 特になし                              | low4項目、high3項目                               |
| 5       | Marelich 2000              | 見えない状態でシャッフル                              | opaque envelopeを使用                 | 盲検化は不可能                                   | 盲検化しなくても評価に影響なし               | データ欠損なし                                 | 詳細プロトコル入手可、期待アウトカムあり                         | 特になし                              | low6項目、high1項目                               |
| 6       | Namen 2001                 | ランダム記載のみで詳述なし                             | 詳述なし                               | 盲検化は不可能                                   | 盲検化しなくても評価に影響なし               | データの欠損なし                                | 研究プロトコルが利用でき、予め決められたアウトカムの報告あり               | 差が出ず早期に終了                         | low3項目、high1項目                               |
| 7       | Navalesi 2008              | 詳細な記載なし                                   | 詳細な記載なし                            | 盲検化は不可能                                   | 盲検化しなくても評価に影響なし               | データの欠損なし                                | 研究プロトコルが利用でき、予め決められたアウトカムの報告あり               | 他のbiasなし                          | low4項目、high1項目                               |
| 8       | Roh 2012                   | computerによるランダム化                          | 割り付けの隠蔽化の手順に問題なし                   | 盲検化は不可能                                   | 盲検化しなくても評価に影響なし               | データの欠損あり(122人中93人の人工呼吸期間を調査、欠損に群間差はない)  | 研究プロトコルが入手不可のため判断困難(再挿管率がない)                 | 他のbiasなし                          | low4項目、high1項目                               |
| 9       | Rose 2008                  | computerによるランダム化                          | ブロック無作為化のため割り付けを予測できる可能性がある        | 盲検化は不可能                                   | 盲検化しなくても評価に影響なし               | データの欠損なし                                | 研究プロトコルが利用でき、アウトカムの報告あり                      | 他のbiasなし                          | low5項目、high1項目                               |
| 10      | Simeone 2002               | 詳細な記載なし                                   | 詳細な記載なし                            | 盲検化は不可能                                   | 盲検化しなくても評価に影響なし               | 判断するには情報が不十分                            | 研究プロトコルが利用できず、判断するには情報が不十分                   | 評価するための十分な情報がない                   | low1項目、high1項目                               |
| 11      | Stahl 2009                 | ブロックランダム割付                                | ブロック無作為化のため割り付けを予測できる可能性がある        | 盲検化は不可能                                   | 盲検化しなくても評価に影響なし               | データの欠損なし                                | 予め決められたアウトカムは報告されている                         | 有効性認めず早期終了                        | low4項目、high1項目                               |

| Outcome |                          | Hospital mortality                      |                                 | risk of bias                                 |          | not serious (0)            |                                      |                                           |                                |
|---------|--------------------------|-----------------------------------------|---------------------------------|----------------------------------------------|----------|----------------------------|--------------------------------------|-------------------------------------------|--------------------------------|
| 番号      | 著者名 発表年 (Forest plot 表示) | risk of bias評価                          |                                 |                                              |          |                            |                                      |                                           |                                |
|         |                          | ランダム割付 順番の生成 random sequence generation | 割り付けの隠蔽化 allocation concealment | ブラインド blinding<br>研究参加者と 治療提供者 and personnel |          | アウトカム評価者 outcome assessors | 不完全なアウトカムデータ incomplete outcome data | 選択されたアウトカムの報告 selective outcome reporting | その他のバイアス Other sources of bias |
| 1       | Ely 1996                 | Low risk                                | Low risk                        | High risk                                    | Low risk | Low risk                   | Low risk                             | Low risk                                  | Low risk                       |
| 2       | Kollef 1997              | Low risk                                | Unclear risk                    | High risk                                    | Low risk | Low risk                   | Low risk                             | Low risk                                  | Low risk                       |
| 3       | Krishnan 2004            | High risk                               | High risk                       | High risk                                    | Low risk | Low risk                   | Low risk                             | Low risk                                  | Unclear risk                   |
| 4       | Marelich 2000            | Low risk                                | Low risk                        | High risk                                    | Low risk | Low risk                   | Low risk                             | Low risk                                  | Low risk                       |
| 5       | Namen 2001               | Unclear risk                            | Unclear risk                    | High risk                                    | Low risk | Low risk                   | Low risk                             | Unclear risk                              | Low risk                       |
| 6       | Roh 2012                 | Low risk                                | Low risk                        | High risk                                    | Low risk | Unclear risk               | Unclear risk                         | Low risk                                  | Low risk                       |
| 7       | Stahl 2009               | Low risk                                | Unclear risk                    | High risk                                    | Low risk | Low risk                   | Low risk                             | Unclear risk                              | Low risk                       |

| 番号 | 著者名 発表年 (Forest plot 表示) | risk of biasコメント                        |                                 |                                              |                 |                                         |                                      |                                           |                                |
|----|--------------------------|-----------------------------------------|---------------------------------|----------------------------------------------|-----------------|-----------------------------------------|--------------------------------------|-------------------------------------------|--------------------------------|
|    |                          | ランダム割付 順番の生成 random sequence generation | 割り付けの隠蔽化 allocation concealment | ブラインド blinding<br>研究参加者と 治療提供者 and personnel |                 | アウトカム評価者 outcome assessors              | 不完全なアウトカムデータ incomplete outcome data | 選択されたアウトカムの報告 selective outcome reporting | その他のバイアス Other sources of bias |
| 1  | Ely 1996                 | コンピュータを使用                               | opaque envelope                 | 盲検化は不可能                                      | 盲検化しなくても評価に影響なし | データ欠損なし                                 | 期待アウトカム含む プロトコル記載あり                  | 特になし                                      | low6項目、high1項目                 |
| 2  | Kollef 1997              | ブロック無作為のため                              | ブロックのため                         | 盲検化は不可能                                      | 盲検化しなくても評価に影響なし | データ欠損なし                                 | 期待アウトカム含む、プロトコル記載あり                  | 特になし                                      | low5項目、high1項目                 |
| 3  | Krishnan 2004            | 病院での番号が偶数か奇数かで割り付け                      | 偶数か奇数かなので予想可能                   | 盲検化は不可能                                      | 盲検化しなくても評価に影響なし | データ欠損なし                                 | 研究プロトコル入手可能、期待アウトカム含む                | 特になし                                      | low4項目、high3項目                 |
| 4  | Marelich 2000            | 見えない状態でシャッフル                            | opaque envelopeを使用              | 盲検化は不可能                                      | 盲検化しなくても評価に影響なし | データ欠損なし                                 | 詳細プロトコル入手可、期待アウトカムあり                 | 特になし                                      | low6項目、high1項目                 |
| 5  | Namen 2001               | ランダム記載のみで詳述なし                           | 詳述なし                            | 盲検化は不可能                                      | 盲検化しなくても評価に影響なし | データの欠損なし                                | 研究プロトコルが利用でき、予め決められたアウトカムの報告あり       | 差が出ず早期に終了                                 | low3項目、high1項目                 |
| 6  | Roh 2012                 | computerによるランダム化                        | 割り付けの隠蔽化の手順に問題なし                | 盲検化は不可能                                      | 盲検化しなくても評価に影響なし | データの欠損あり (122人中93人の人工呼吸期間を調査、欠損に群間差はない) | 研究プロトコルが入手不可のため判断困難(再挿管率がない)         | 他のbiasなし                                  | low4項目、high1項目                 |
| 7  | Stahl 2009               | ブロックランダム割付                              | ブロック無作為化のため割り付けを予想できる可能性がある     | 盲検化は不可能                                      | 盲検化しなくても評価に影響なし | データの欠損なし                                | 予め決められたアウトカムは報告されている                 | 有効性認めず早期終了                                | low4項目、high1項目                 |

CQ06  
Risk of bias table, Reintubation

| Outcome |                             | Reintubation                                        | risk of bias                              |                                                  | not serious (0)                      |                                                |                                                            |                                          |                                                     |
|---------|-----------------------------|-----------------------------------------------------|-------------------------------------------|--------------------------------------------------|--------------------------------------|------------------------------------------------|------------------------------------------------------------|------------------------------------------|-----------------------------------------------------|
| 番号      | 著者名 発表年<br>(Forest plot 表示) | risk of bias評価                                      |                                           |                                                  |                                      |                                                |                                                            |                                          |                                                     |
|         |                             | ランダム割付<br>順番の生成<br>random<br>sequence<br>generation | 割り付けの隠<br>蔽化<br>allocation<br>concealment | ブラインド<br>blinding                                |                                      | 不完全なアウト<br>カムデータ<br>incomplete<br>outcome data | 選択されたア<br>ウトカムの報<br>告<br>selective<br>outcome<br>reporting | その他のバイ<br>アス<br>Other sources<br>of bias | 研究内でのバ<br>イアスのリスク<br>Risk of bias<br>within a study |
|         |                             |                                                     |                                           | 研究参加者と<br>治療提供者<br>participants<br>and personnel | アウトカム評<br>価者<br>outcome<br>assessors |                                                |                                                            |                                          |                                                     |
| 1       | Chaiwat 2010                | Low risk                                            | Unclear risk                              | High risk                                        | Low risk                             | Low risk                                       | Unclear risk                                               | High risk                                | Unclear risk                                        |
| 2       | Ely 1996                    | Low risk                                            | Low risk                                  | High risk                                        | Low risk                             | Low risk                                       | Low risk                                                   | Low risk                                 | Low risk                                            |
| 3       | Kollef 1997                 | Low risk                                            | Unclear risk                              | High risk                                        | Low risk                             | Low risk                                       | Low risk                                                   | Low risk                                 | Low risk                                            |
| 4       | Namen 2001                  | Unclear risk                                        | Unclear risk                              | High risk                                        | Low risk                             | Low risk                                       | Low risk                                                   | Unclear risk                             | Low risk                                            |
| 5       | Navalesi 2008               | Unclear risk                                        | Unclear risk                              | High risk                                        | Low risk                             | Low risk                                       | Low risk                                                   | Low risk                                 | Low risk                                            |
| 6       | Piotto 2011                 | High risk                                           | High risk                                 | High risk                                        | Low risk                             | Unclear risk                                   | Low risk                                                   | Low risk                                 | Unclear risk                                        |
| 7       | Rose 2008                   | Low risk                                            | Unclear risk                              | High risk                                        | Low risk                             | Low risk                                       | Low risk                                                   | Low risk                                 | Low risk                                            |
| 8       | Simeone 2002                | Unclear risk                                        | Unclear risk                              | High risk                                        | Low risk                             | Unclear risk                                   | Unclear risk                                               | Unclear risk                             | Unclear risk                                        |
| 9       | Stahl 2009                  | Low risk                                            | Unclear risk                              | High risk                                        | Low risk                             | Low risk                                       | Low risk                                                   | Unclear risk                             | Low risk                                            |

| 番号 | 著者名 発表年<br>(Forest plot 表示) | risk of biasコメント     |                                                 |         |                     |                     |                                             |                     |                    |
|----|-----------------------------|----------------------|-------------------------------------------------|---------|---------------------|---------------------|---------------------------------------------|---------------------|--------------------|
| 1  | Chaiwat 2010                | ブロック無作為              | Opaque envelope <sup>だ</sup><br>がブロック無作為<br>のため | 盲検化は不可能 | 盲検化しなくても評<br>価に影響なし | データの欠損なし            | 研究プロトコル<br>が利用できないた<br>め、情報が不十分<br>(死亡率もない) | 有意な結果で早期<br>中止      | low3項目、high2項<br>目 |
| 2  | Ely 1996                    | コンピュータを使用            | opaque envelope                                 | 盲検化は不可能 | 盲検化しなくても評<br>価に影響なし | データ欠損なし             | 期待アウトカム含<br>む プロトコル記載<br>あり                 | 特になし                | low6項目、high1項<br>目 |
| 3  | Kollef 1997                 | ブロック無作為の<br>ため       | ブロックのため                                         | 盲検化は不可能 | 盲検化しなくても評<br>価に影響なし | データ欠損なし             | 期待アウトカム含<br>む、プロトコル記載<br>あり                 | 特になし                | low5項目、high1項<br>目 |
| 4  | Namen 2001                  | ランダムに記載の<br>みで詳述なし   | 詳述なし                                            | 盲検化は不可能 | 盲検化しなくても評<br>価に影響なし | データの欠損なし            | 研究プロトコル<br>が利用でき、予め<br>決められたアウトカ<br>ムの報告あり  | 差が出ず早期に終<br>了       | low3項目、high1項<br>目 |
| 5  | Navalesi 2008               | 詳細な記載なし              | 詳細な記載なし                                         | 盲検化は不可能 | 盲検化しなくても評<br>価に影響なし | データの欠損なし            | 研究プロトコル<br>が利用でき、予め<br>決められたアウトカ<br>ムの報告あり  | 他のbiasなし            | low4項目、high1項<br>目 |
| 6  | Piotto 2011                 | 交互に割付された             | 交互に割付された                                        | 盲検化は不可能 | 盲検化しなくても評<br>価に影響なし | 判断するための十<br>分な情報がない | 研究プロトコル<br>が利用でき、予め<br>決められたアウトカ<br>ムの報告あり  | 他のbiasなし            | low3項目、high3項<br>目 |
| 7  | Rose 2008                   | computerによるラ<br>ンダム化 | ブロック無作為化<br>のため割り付けを<br>予測できる可能性<br>がある         | 盲検化は不可能 | 盲検化しなくても評<br>価に影響なし | データの欠損なし            | 研究プロトコル<br>が利用でき、アウト<br>カムの報告あり             | 他のbiasなし            | low5項目、high1項<br>目 |
| 8  | Simeone 2002                | 詳細な記載なし              | 詳細な記載なし                                         | 盲検化は不可能 | 盲検化しなくても評<br>価に影響なし | 判断するには情報<br>が不十分    | 研究プロトコル<br>が利用できず、判<br>断するには情報が<br>不十分      | 評価するための十<br>分な情報がない | low1項目、high1項<br>目 |
| 8  | Stahl 2009                  | ブロックランダム割<br>付       | ブロック無作為化<br>のため割り付けを<br>予測できる可能性<br>がある         | 盲検化は不可能 | 盲検化しなくても評<br>価に影響なし | データの欠損なし            | 予め決められたア<br>ウトカムは報告さ<br>れている                | 有効性認めず早期<br>終了      | low4項目、high1項<br>目 |

CQ06  
Risk of bias table, Tracheostomy

| Tracheostomy |                             | Tracheostomy                                        |                                       | risk of bias                                 |                                  | not serious (0)                            |                                       |                                      |                                                 |
|--------------|-----------------------------|-----------------------------------------------------|---------------------------------------|----------------------------------------------|----------------------------------|--------------------------------------------|---------------------------------------|--------------------------------------|-------------------------------------------------|
| 番号           | 著者名 発表年<br>(Forest plot 表示) | ランダム割付<br>順番の生成<br>random<br>sequence<br>generation | 割り付けの隠蔽化<br>allocation<br>concealment | ブラインド                                        |                                  | 不完全なアウトカムデータ<br>incomplete<br>outcome data | 選択されたアウトカムの報告<br>selective<br>outcome | その他のバイアス<br>Other sources<br>of bias | 研究内でのバイアスのリスク<br>Risk of bias<br>within a study |
|              |                             |                                                     |                                       | 研究参加者と治療提供者<br>participants<br>and personnel | アウトカム評価者<br>outcome<br>assessors |                                            |                                       |                                      |                                                 |
| 1            | Ely 1996                    | Low risk                                            | Low risk                              | High risk                                    | Low risk                         | Low risk                                   | Low risk                              | Low risk                             | Low risk                                        |
| 2            | Marelich 2000               | Low risk                                            | Low risk                              | High risk                                    | Low risk                         | Low risk                                   | Low risk                              | Low risk                             | Low risk                                        |
| 3            | Namen 2001                  | Unclear risk                                        | Unclear risk                          | High risk                                    | Low risk                         | Low risk                                   | Low risk                              | Unclear risk                         | Low risk                                        |
| 4            | Navalesi 2008               | Unclear risk                                        | Unclear risk                          | High risk                                    | Low risk                         | Low risk                                   | Low risk                              | Low risk                             | Low risk                                        |
| 5            | Roh 2012                    | Low risk                                            | Low risk                              | High risk                                    | Low risk                         | Unclear risk                               | Unclear risk                          | Low risk                             | Low risk                                        |
| 6            | Rose 2008                   | Low risk                                            | Unclear risk                          | High risk                                    | Low risk                         | Low risk                                   | Low risk                              | Low risk                             | Low risk                                        |

| 番号 | 著者名 発表年<br>(Forest plot 表示) | risk of biasコメント |                                     |         |                 |                                                |                                    |           |                |
|----|-----------------------------|------------------|-------------------------------------|---------|-----------------|------------------------------------------------|------------------------------------|-----------|----------------|
| 1  | Ely 1996                    | コンピュータを使用        | opaque envelope                     | 盲検化は不可能 | 盲検化しなくても評価に影響なし | データ欠損なし                                        | 期待アウトカム含む<br>プロトコル記載あり             | 特になし      | low6項目、high1項目 |
| 2  | Marelich 2000               | 見えない状態でシャッフル     | opaque envelopeを使用                  | 盲検化は不可能 | 盲検化しなくても評価に影響なし | データ欠損なし                                        | 詳細プロトコル<br>入手可、期待アウトカムあり           | 特になし      | low6項目、high1項目 |
| 3  | Namen 2001                  | ランダム記載のみで詳述なし    | 詳述なし                                | 盲検化は不可能 | 盲検化しなくても評価に影響なし | データの欠損なし                                       | 研究プロトコルが<br>利用でき、予め決められたアウトカムの報告あり | 差が出ず早期に終了 | low3項目、high1項目 |
| 4  | Navalesi 2008               | 詳細な記載なし          | 詳細な記載なし                             | 盲検化は不可能 | 盲検化しなくても評価に影響なし | データの欠損なし                                       | 研究プロトコルが<br>利用でき、予め決められたアウトカムの報告あり | 他のbiasなし  | low4項目、high1項目 |
| 5  | Roh 2012                    | computerによるランダム化 | 割り付けの隠蔽化の<br>手順に問題なし                | 盲検化は不可能 | 盲検化しなくても評価に影響なし | データの欠損あり<br>(122人中93人の人工呼吸期間を調査、<br>欠損に群間差はない) | 研究プロトコルが<br>入手不可のため判断困難(再挿管率がない)   | 他のbiasなし  | low4項目、high1項目 |
| 6  | Rose 2008                   | computerによるランダム化 | ブロック無作為化のため<br>割り付けを予測できる可能性<br>がある | 盲検化は不可能 | 盲検化しなくても評価に影響なし | データの欠損なし                                       | 研究プロトコルが<br>利用でき、アウトカムの報告あり        | 他のbiasなし  | low5項目、high1項目 |

## Mechanical Ventilation Time

|              | Random sequence generation (selection bias) | Allocation concealment (selection bias) | Blinding of participants and personnel (performance bias) | Blinding of outcome assessment (detection bias) | Incomplete outcome data (attrition bias) | Selective reporting (reporting bias) | Other bias |
|--------------|---------------------------------------------|-----------------------------------------|-----------------------------------------------------------|-------------------------------------------------|------------------------------------------|--------------------------------------|------------|
| Chaiwat2010  | +                                           | ?                                       | -                                                         | +                                               | +                                        | ?                                    | -          |
| Ely1996      | +                                           | +                                       | -                                                         | +                                               | +                                        | +                                    | +          |
| Kollef1997   | +                                           | ?                                       | -                                                         | +                                               | +                                        | +                                    | +          |
| Krishnan2004 | -                                           | -                                       | -                                                         | +                                               | +                                        | +                                    | +          |
| Marelich2000 | +                                           | +                                       | -                                                         | +                                               | +                                        | +                                    | +          |
| Namen2001    | ?                                           | ?                                       | -                                                         | +                                               | +                                        | +                                    | ?          |
| Navalesi2008 | ?                                           | ?                                       | -                                                         | +                                               | +                                        | +                                    | +          |
| Piotto2011   | -                                           | -                                       | -                                                         | +                                               | ?                                        | +                                    | +          |
| Roh2012      | +                                           | +                                       | -                                                         | +                                               | ?                                        | ?                                    | +          |
| Rose2008     | +                                           | ?                                       | -                                                         | +                                               | +                                        | +                                    | +          |
| simeone2002  | ?                                           | ?                                       | -                                                         | +                                               | ?                                        | ?                                    | ?          |
| Stahl2009    | +                                           | ?                                       | -                                                         | +                                               | +                                        | +                                    | ?          |

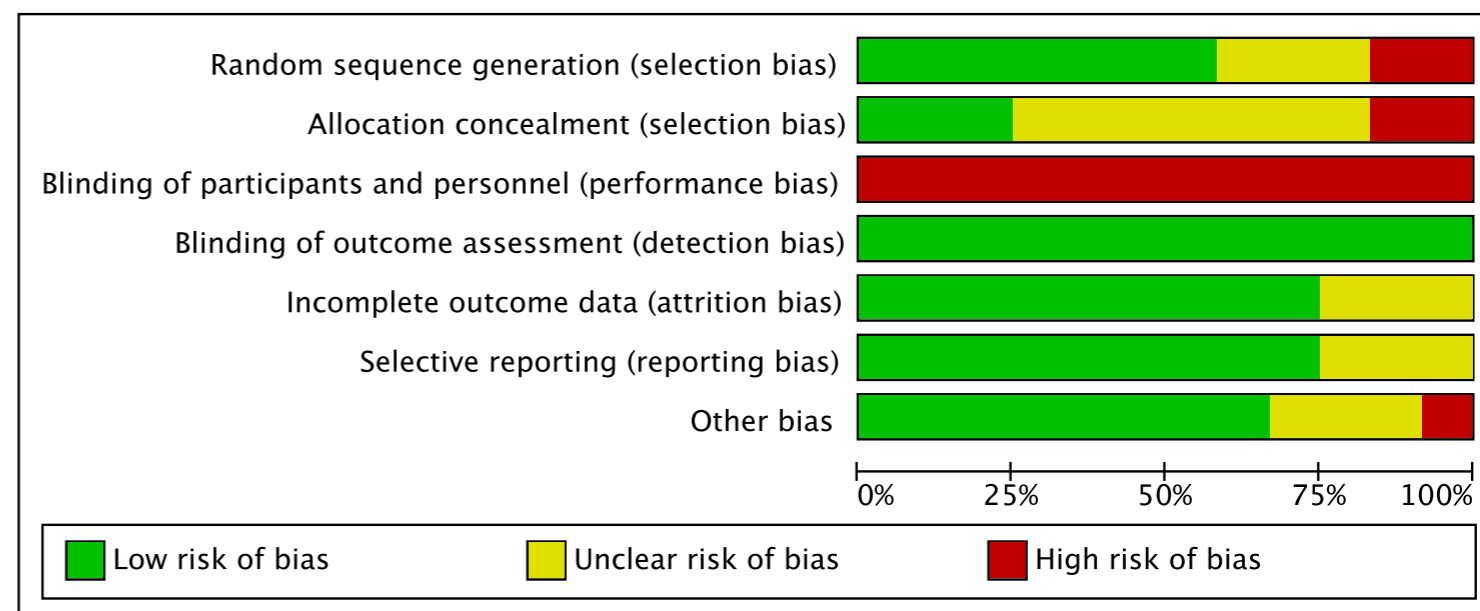

## In hospital mortality

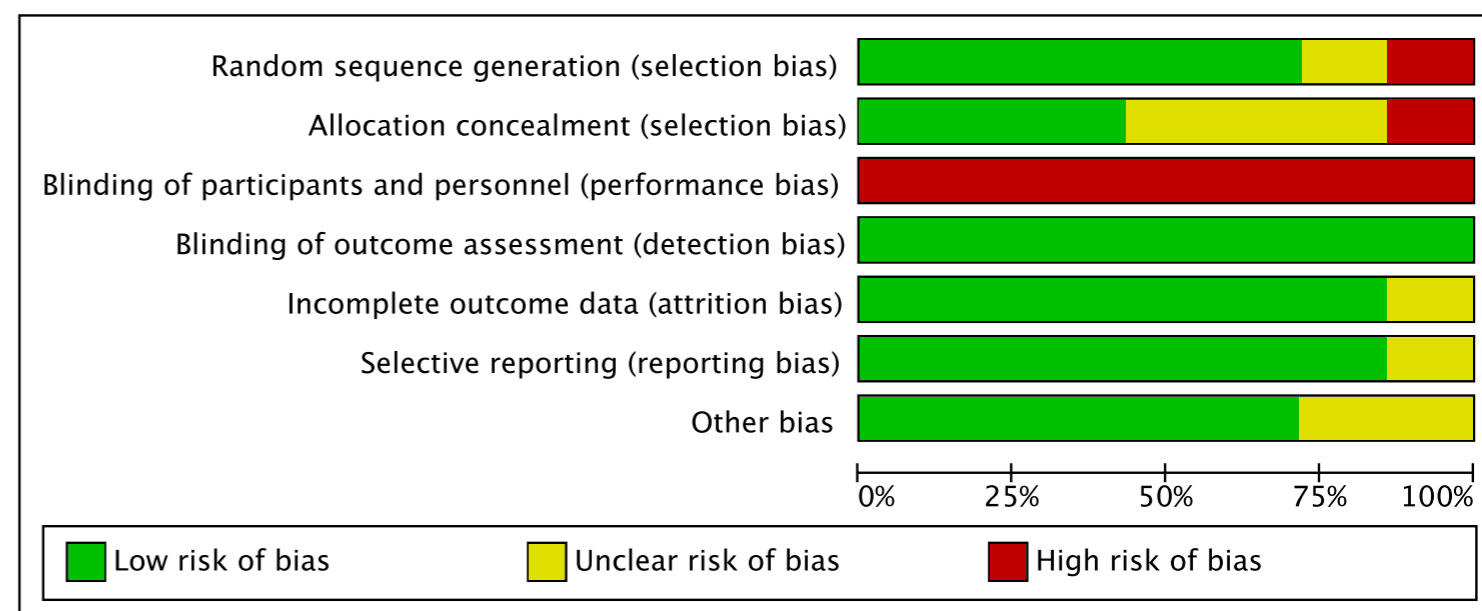

|              | Random sequence generation (selection bias) | Allocation concealment (selection bias) | Blinding of participants and personnel (performance bias) | Blinding of outcome assessment (detection bias) | Incomplete outcome data (attrition bias) | Selective reporting (reporting bias) | Other bias |
|--------------|---------------------------------------------|-----------------------------------------|-----------------------------------------------------------|-------------------------------------------------|------------------------------------------|--------------------------------------|------------|
| Ely1996      | +                                           | +                                       | -                                                         | +                                               | +                                        | +                                    | +          |
| Kollef1997   | +                                           | ?                                       | -                                                         | +                                               | +                                        | +                                    | +          |
| Krishnan2004 | -                                           | -                                       | -                                                         | +                                               | +                                        | +                                    | +          |
| Marelich2000 | +                                           | +                                       | -                                                         | +                                               | +                                        | +                                    | +          |
| Namen2001    | ?                                           | ?                                       | -                                                         | +                                               | +                                        | +                                    | ?          |
| Roh2012      | +                                           | +                                       | -                                                         | +                                               | ?                                        | ?                                    | +          |
| Stahl2009    | +                                           | ?                                       | -                                                         | +                                               | +                                        | +                                    | ?          |

## Re-intubation

|              | Random sequence generation (selection bias) | Allocation concealment (selection bias) | Blinding of participants and personnel (performance bias) | Blinding of outcome assessment (detection bias) | Incomplete outcome data (attrition bias) | Selective reporting (reporting bias) | Other bias |
|--------------|---------------------------------------------|-----------------------------------------|-----------------------------------------------------------|-------------------------------------------------|------------------------------------------|--------------------------------------|------------|
| Chaiwat2010  | +                                           | ?                                       | -                                                         | +                                               | +                                        | ?                                    | -          |
| Ely1996      | +                                           | +                                       | -                                                         | +                                               | +                                        | +                                    | +          |
| Kollef1997   | +                                           | ?                                       | -                                                         | +                                               | +                                        | +                                    | +          |
| Namen2001    | ?                                           | ?                                       | -                                                         | +                                               | +                                        | +                                    | ?          |
| Navalesi2008 | ?                                           | ?                                       | -                                                         | +                                               | +                                        | +                                    | +          |
| Piotto2011   | -                                           | -                                       | -                                                         | +                                               | ?                                        | +                                    | +          |
| Rose2008     | +                                           | ?                                       | -                                                         | +                                               | +                                        | +                                    | +          |
| simeone2002  | ?                                           | ?                                       | -                                                         | +                                               | ?                                        | ?                                    | ?          |
| Stahl2009    | +                                           | ?                                       | -                                                         | +                                               | +                                        | +                                    | ?          |

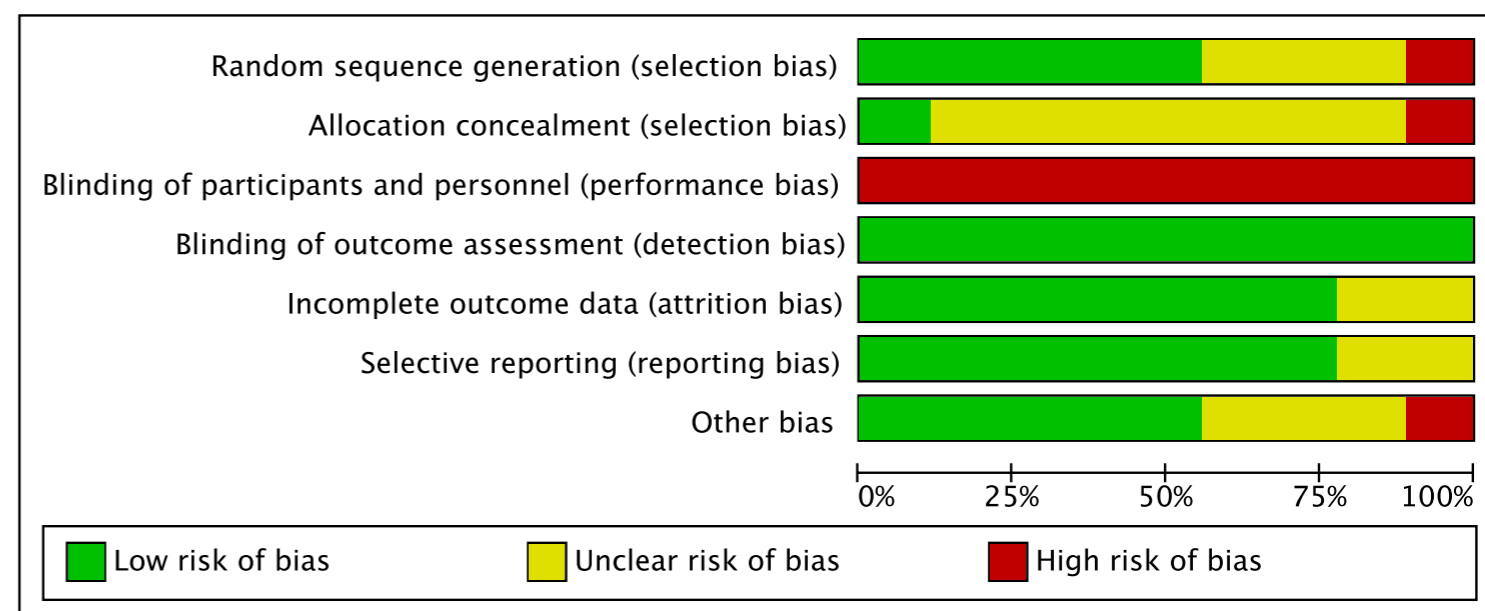



# tracheostomy

|              | Random sequence generation (selection bias) | Allocation concealment (selection bias) | Blinding of participants and personnel (performance bias) | Blinding of outcome assessment (detection bias) | Incomplete outcome data (attrition bias) | Selective reporting (reporting bias) | Other bias |
|--------------|---------------------------------------------|-----------------------------------------|-----------------------------------------------------------|-------------------------------------------------|------------------------------------------|--------------------------------------|------------|
| Ely1996      | +                                           | +                                       | -                                                         | +                                               | +                                        | +                                    | +          |
| Marelich2000 | +                                           | +                                       | -                                                         | +                                               | +                                        | +                                    | +          |
| Namen2001    | ?                                           | ?                                       | -                                                         | +                                               | +                                        | +                                    | ?          |
| Navalesi2008 | ?                                           | ?                                       | -                                                         | +                                               | +                                        | +                                    | +          |
| Roh2012      | +                                           | +                                       | -                                                         | +                                               | ?                                        | ?                                    | +          |
| Rose2008     | +                                           | ?                                       | -                                                         | +                                               | +                                        | +                                    | +          |

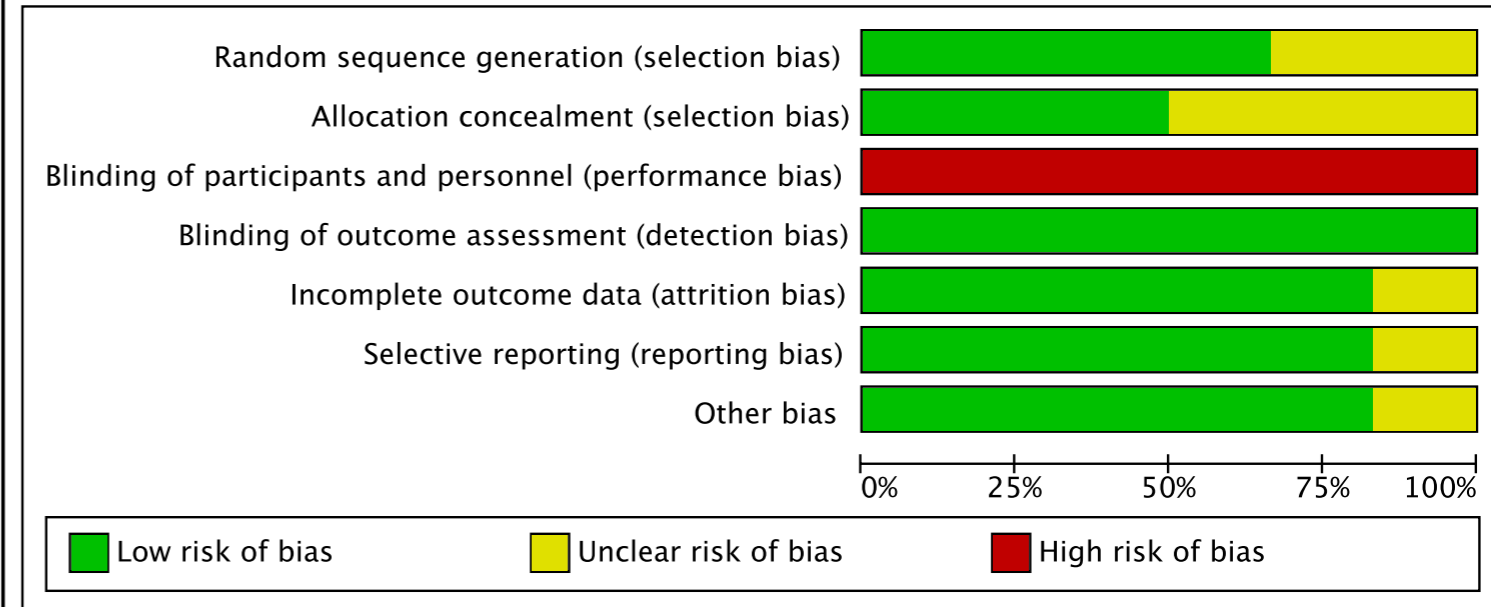

## Mechanical Ventilation Time

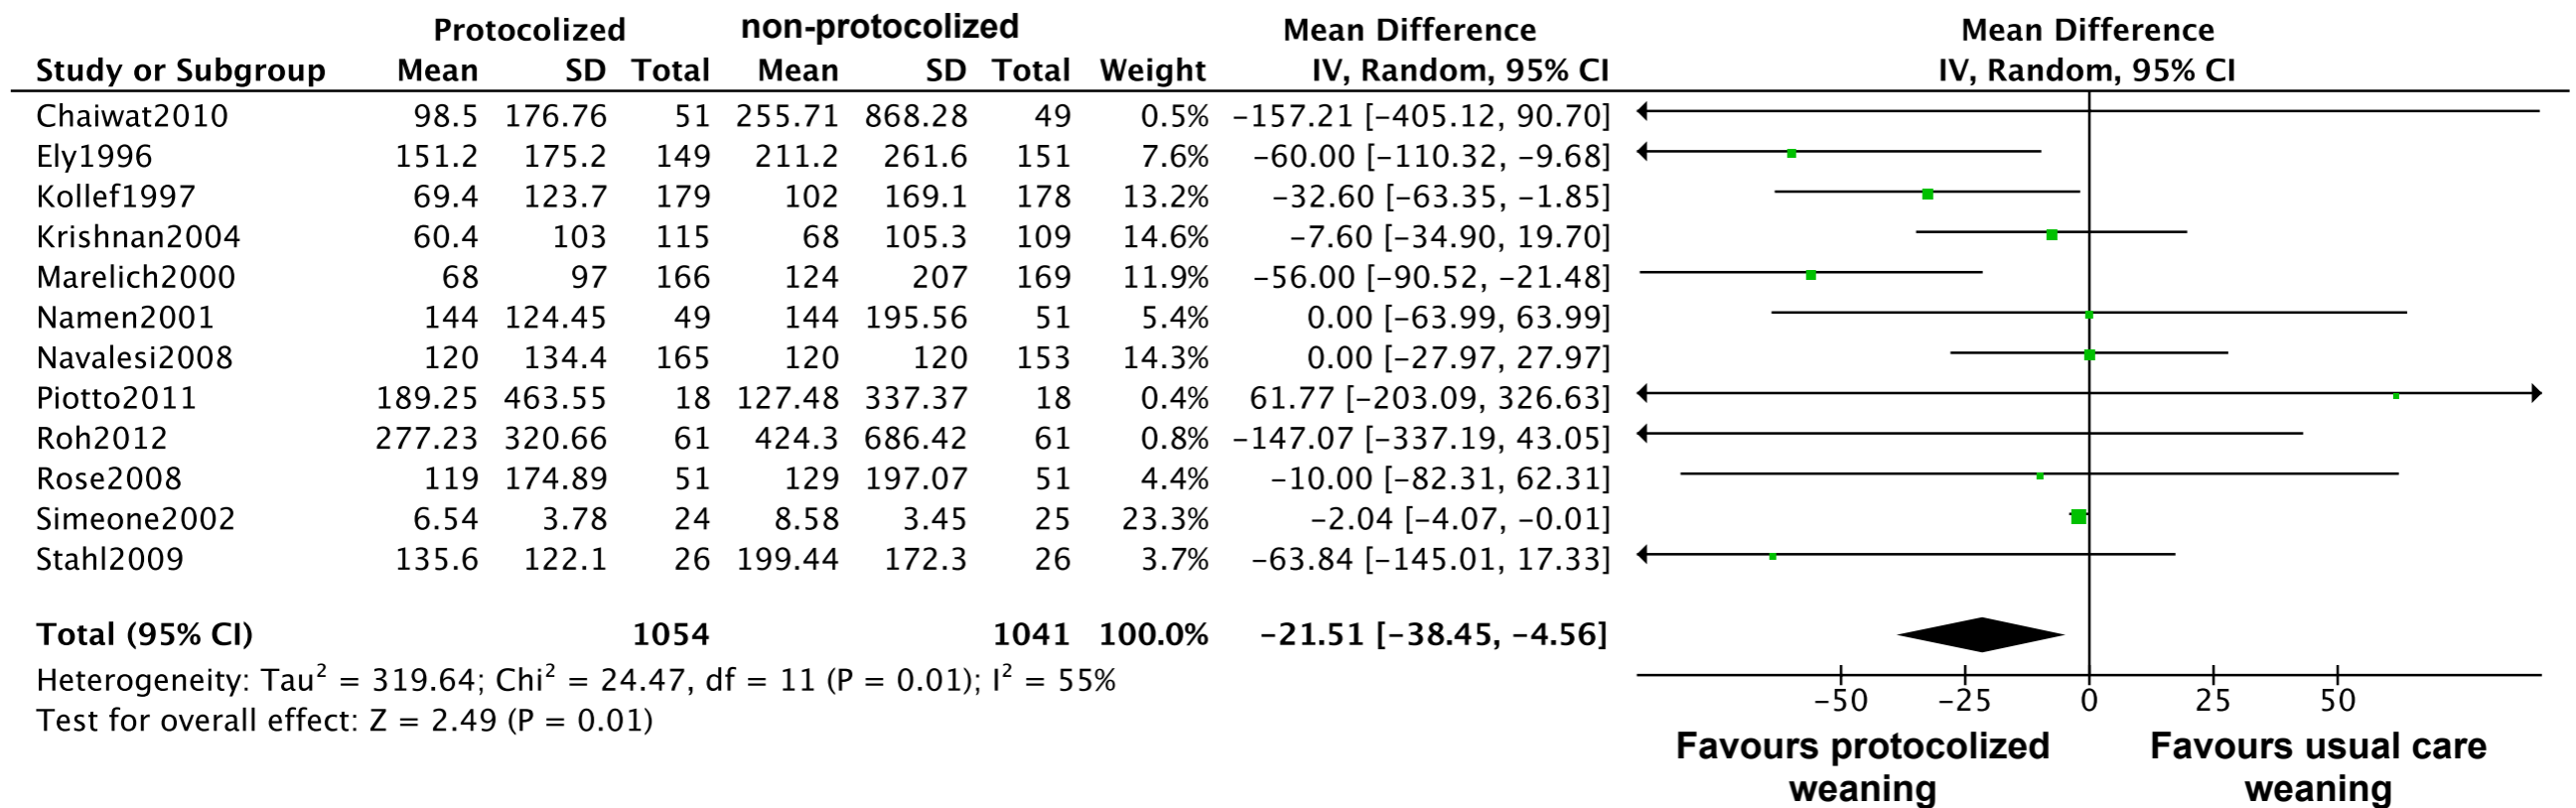

## In hospital mortality

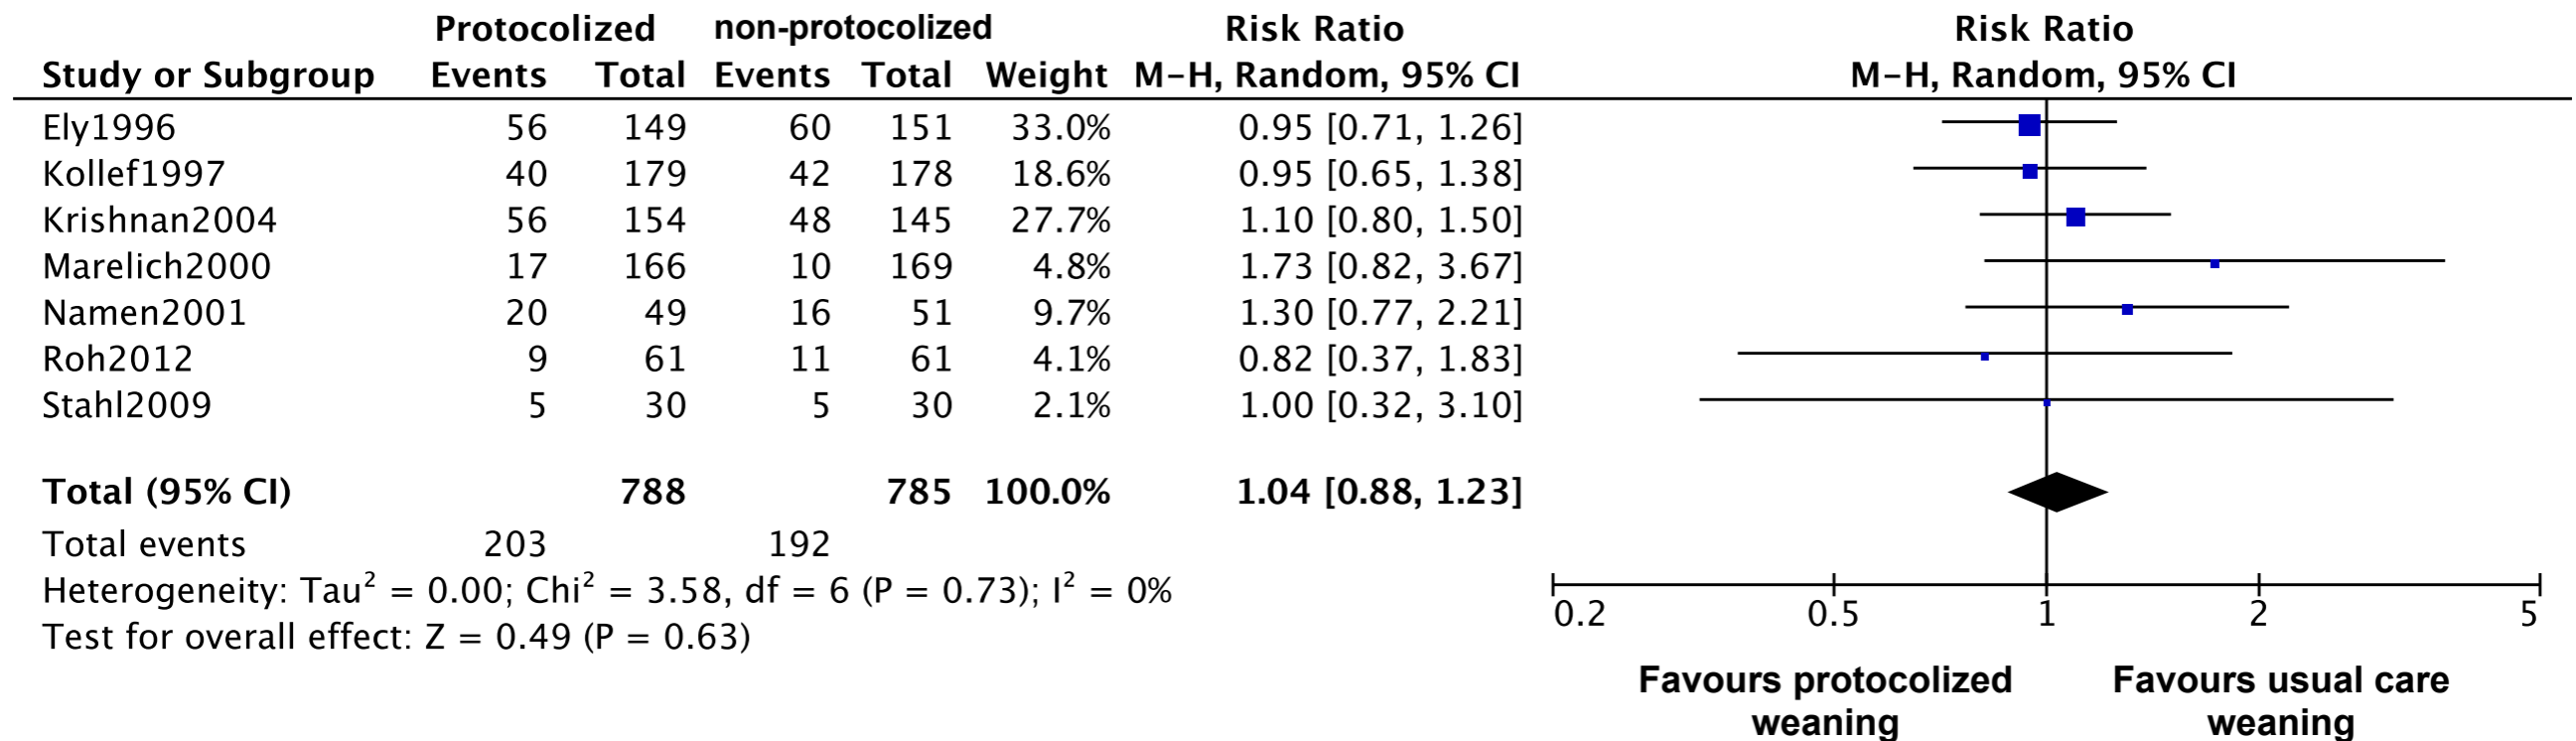

## Re-intubation

| Study or Subgroup                                                                                            | Protocolized |            | non-protocolized |            | Weight        | Risk Ratio               |
|--------------------------------------------------------------------------------------------------------------|--------------|------------|------------------|------------|---------------|--------------------------|
|                                                                                                              | Events       | Total      | Events           | Total      |               | M-H, Random, 95% CI      |
| Chaiwat2010                                                                                                  | 2            | 51         | 3                | 49         | 5.6%          | 0.64 [0.11, 3.67]        |
| Ely1996                                                                                                      | 5            | 149        | 12               | 151        | 11.6%         | 0.42 [0.15, 1.17]        |
| Kollef1997                                                                                                   | 23           | 179        | 18               | 178        | 18.6%         | 1.27 [0.71, 2.27]        |
| Namen2001                                                                                                    | 10           | 49         | 6                | 51         | 12.7%         | 1.73 [0.68, 4.41]        |
| Navalesi2008                                                                                                 | 9            | 165        | 18               | 153        | 15.2%         | 0.46 [0.21, 1.00]        |
| Piotto2011                                                                                                   | 3            | 18         | 12               | 18         | 10.8%         | 0.25 [0.08, 0.74]        |
| Rose2008                                                                                                     | 5            | 51         | 6                | 51         | 10.4%         | 0.83 [0.27, 2.56]        |
| Simeone2002                                                                                                  | 1            | 24         | 0                | 25         | 2.0%          | 3.12 [0.13, 73.04]       |
| Stahl2009                                                                                                    | 8            | 26         | 6                | 26         | 13.1%         | 1.33 [0.54, 3.31]        |
| <b>Total (95% CI)</b>                                                                                        |              | <b>712</b> |                  | <b>702</b> | <b>100.0%</b> | <b>0.79 [0.50, 1.26]</b> |
| Total events                                                                                                 | 66           |            | 81               |            |               |                          |
| Heterogeneity: $\text{Tau}^2 = 0.21$ ; $\text{Chi}^2 = 14.92$ , $\text{df} = 8$ ( $P = 0.06$ ); $I^2 = 46\%$ |              |            |                  |            |               |                          |
| Test for overall effect: $Z = 0.99$ ( $P = 0.32$ )                                                           |              |            |                  |            |               |                          |

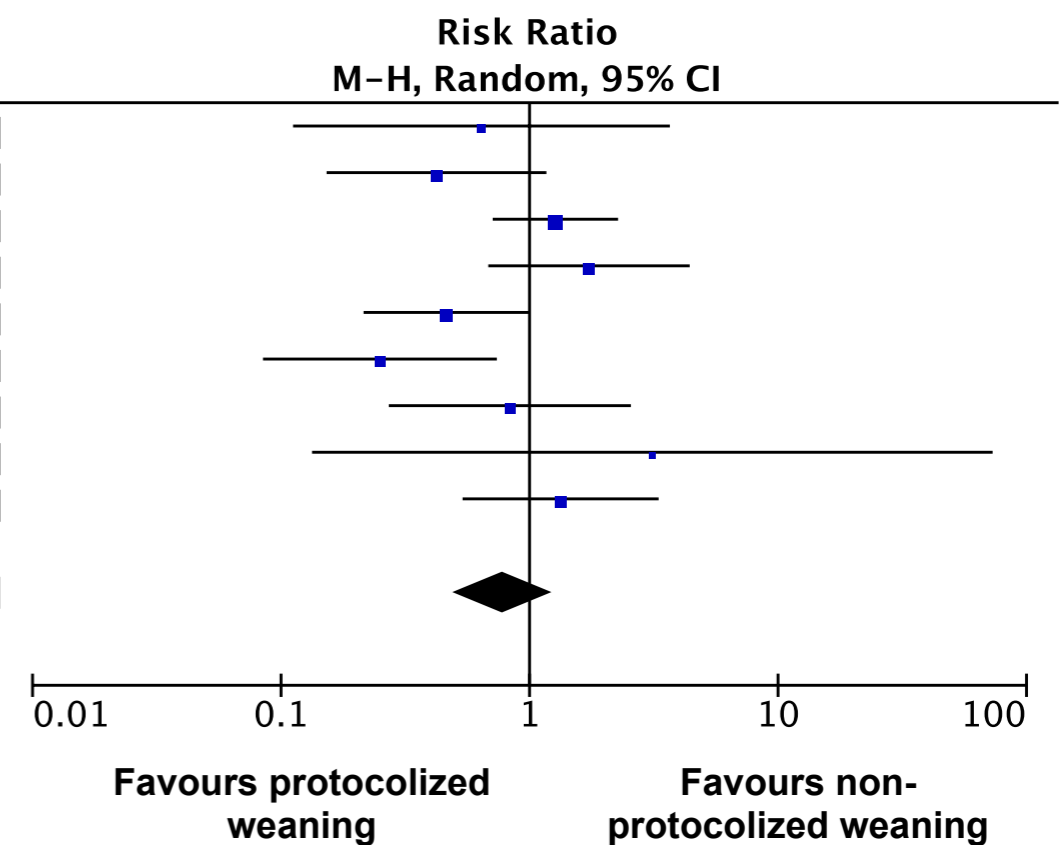

## Tracheostomy

| Study or Subgroup                                                                                          | Protocolized |            | non-protocolized |            | Weight        | Risk Ratio               |
|------------------------------------------------------------------------------------------------------------|--------------|------------|------------------|------------|---------------|--------------------------|
|                                                                                                            | Events       | Total      | Events           | Total      |               | M-H, Random, 95% CI      |
| Ely1996                                                                                                    | 13           | 149        | 22               | 151        | 24.3%         | 0.60 [0.31, 1.14]        |
| Marellich2000                                                                                              | 13           | 166        | 21               | 169        | 23.5%         | 0.63 [0.33, 1.22]        |
| Namen2001                                                                                                  | 14           | 49         | 15               | 51         | 27.0%         | 0.97 [0.53, 1.79]        |
| Navalesi2008                                                                                               | 5            | 165        | 11               | 153        | 9.5%          | 0.42 [0.15, 1.19]        |
| Roh2012                                                                                                    | 5            | 61         | 3                | 61         | 5.3%          | 1.67 [0.42, 6.67]        |
| Rose2008                                                                                                   | 6            | 51         | 8                | 51         | 10.5%         | 0.75 [0.28, 2.01]        |
| <b>Total (95% CI)</b>                                                                                      |              | <b>641</b> |                  | <b>636</b> | <b>100.0%</b> | <b>0.72 [0.52, 0.99]</b> |
| Total events                                                                                               | 56           |            | 80               |            |               |                          |
| Heterogeneity: $\text{Tau}^2 = 0.00$ ; $\text{Chi}^2 = 3.85$ , $\text{df} = 5$ ( $P = 0.57$ ); $I^2 = 0\%$ |              |            |                  |            |               |                          |
| Test for overall effect: $Z = 2.00$ ( $P = 0.05$ )                                                         |              |            |                  |            |               |                          |

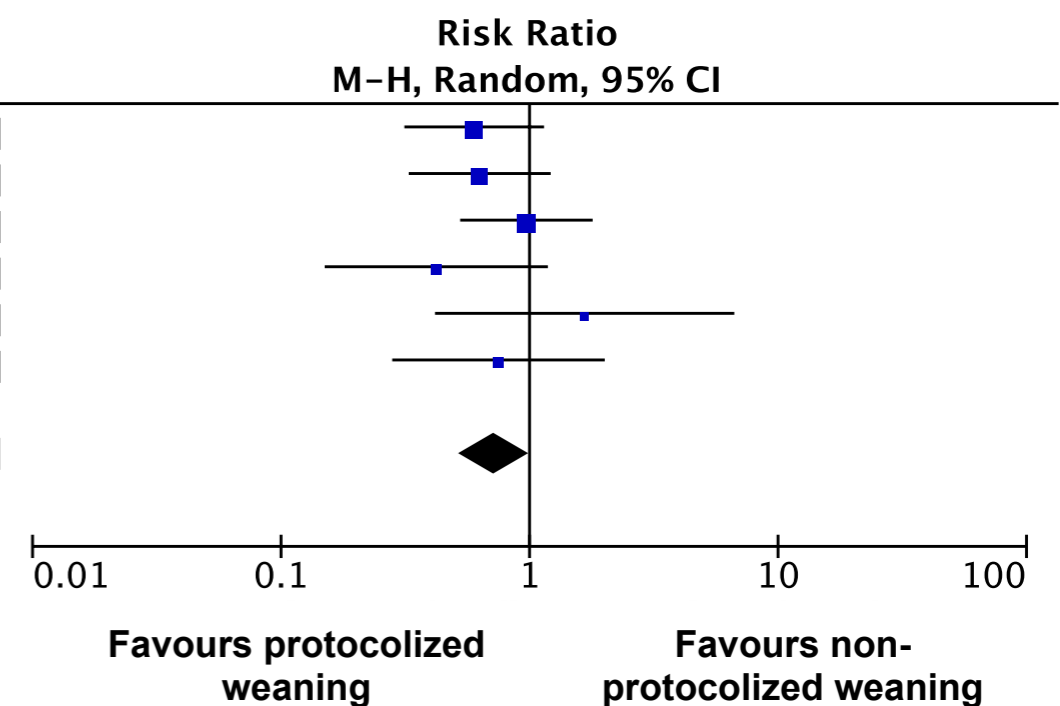

subgroup analysis  
Mechanical ventilation time  
(RCTs with SBT protocol)

| Study or Subgroup     | protocolized |        | non-protocolized |        |        | Weight     | Mean Difference<br>IV, Random, 95% CI |                              |
|-----------------------|--------------|--------|------------------|--------|--------|------------|---------------------------------------|------------------------------|
|                       | Mean         | SD     | Total            | Mean   | SD     |            |                                       |                              |
| Chaiwat2010           | 98.5         | 176.76 | 51               | 255.71 | 868.28 | 49         | 0.7%                                  | -157.21 [-405.12, 90.70]     |
| Ely1996               | 151.2        | 175.2  | 149              | 211.2  | 261.6  | 151        | 15.1%                                 | -60.00 [-110.32, -9.68]      |
| Kollef1997            | 69.4         | 123.7  | 179              | 102    | 169.1  | 178        | 0.0%                                  | -32.60 [-63.35, -1.85]       |
| Krishnan2004          | 60.4         | 103    | 115              | 68     | 105.3  | 109        | 37.3%                                 | -7.60 [-34.90, 19.70]        |
| Marelich2000          | 68           | 97     | 166              | 124    | 207    | 169        | 0.0%                                  | -56.00 [-90.52, -21.48]      |
| Namen2001             | 144          | 124.45 | 49               | 144    | 195.56 | 51         | 10.0%                                 | 0.00 [-63.99, 63.99]         |
| Navalesi2008          | 120          | 134.4  | 165              | 120    | 120    | 153        | 36.2%                                 | 0.00 [-27.97, 27.97]         |
| Piotto2011            | 189          | 463.5  | 18               | 127.5  | 337.4  | 18         | 0.6%                                  | 61.50 [-203.35, 326.35]      |
| Roh2012               | 277.23       | 320.66 | 61               | 424.3  | 686.42 | 61         | 0.0%                                  | -147.07 [-337.19, 43.05]     |
| Rose2008              | 119          | 174.89 | 51               | 129    | 197.07 | 51         | 0.0%                                  | -10.00 [-82.31, 62.31]       |
| Simeone2002           | 6.54         | 3.78   | 24               | 8.58   | 3.45   | 25         | 0.0%                                  | -2.04 [-4.07, -0.01]         |
| Stahl2009             | 135.6        | 122.1  | 26               | 199.44 | 172.3  | 26         | 0.0%                                  | -63.84 [-145.01, 17.33]      |
| <b>Total (95% CI)</b> |              |        | <b>547</b>       |        |        | <b>531</b> | <b>100.0%</b>                         | <b>-12.67 [-34.00, 8.65]</b> |

Heterogeneity: Tau<sup>2</sup> = 123.36; Chi<sup>2</sup> = 6.03, df = 5 (P = 0.30); I<sup>2</sup> = 17%  
Test for overall effect: Z = 1.16 (P = 0.24)

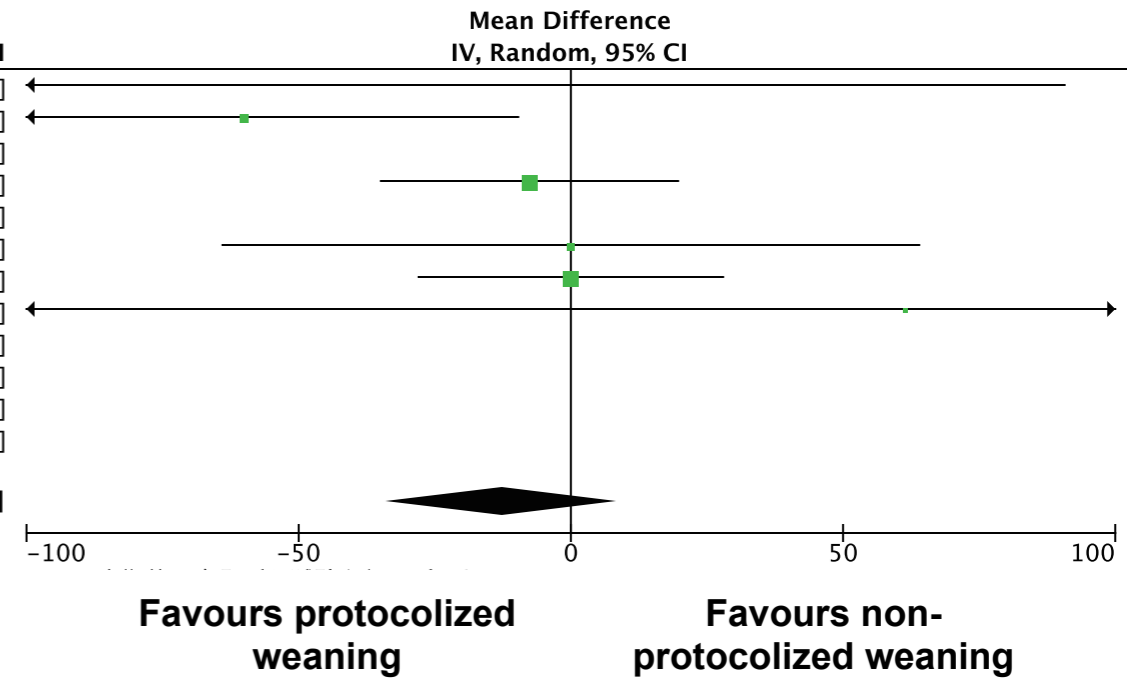

subgroup analysis  
Mechanical ventilation time  
(RCTs with stepwise reduction protocol)

| Study or Subgroup     | protocolized |        | non-protocolized |        |        | Weight     | Mean Difference<br>IV, Random, 95% CI |                               |
|-----------------------|--------------|--------|------------------|--------|--------|------------|---------------------------------------|-------------------------------|
|                       | Mean         | SD     | Total            | Mean   | SD     |            |                                       |                               |
| Chaiwat2010           | 98.5         | 176.76 | 51               | 255.71 | 868.28 | 49         | Not estimable                         |                               |
| Ely1996               | 151.2        | 175.2  | 149              | 211.2  | 261.6  | 151        | Not estimable                         |                               |
| Kollef1997            | 69.4         | 123.7  | 179              | 102    | 169.1  | 178        | 23.6%                                 | -32.60 [-63.35, -1.85]        |
| Krishnan2004          | 60.4         | 103    | 115              | 68     | 105.3  | 109        | Not estimable                         |                               |
| Marelich2000          | 68           | 97     | 166              | 124    | 207    | 169        | 22.2%                                 | -56.00 [-90.52, -21.48]       |
| Namen2001             | 144          | 124.45 | 49               | 144    | 195.56 | 51         | Not estimable                         |                               |
| Navalesi2008          | 120          | 134.4  | 165              | 120    | 120    | 153        | Not estimable                         |                               |
| Piotto2011            | 189.25       | 463.55 | 18               | 127.48 | 337.37 | 18         | Not estimable                         |                               |
| Roh2012               | 277.23       | 320.66 | 61               | 424.3  | 686.42 | 61         | 2.3%                                  | -147.07 [-337.19, 43.05]      |
| Rose2008              | 119          | 174.89 | 51               | 129    | 197.07 | 51         | 11.0%                                 | -10.00 [-82.31, 62.31]        |
| Simeone2002           | 6.54         | 3.78   | 24               | 8.58   | 3.45   | 25         | 31.6%                                 | -2.04 [-4.07, -0.01]          |
| Stahl2009             | 135.6        | 122.1  | 26               | 199.44 | 172.3  | 26         | 9.4%                                  | -63.84 [-145.01, 17.33]       |
| <b>Total (95% CI)</b> |              |        | <b>507</b>       |        |        | <b>510</b> | <b>100.0%</b>                         | <b>-31.17 [-60.86, -1.49]</b> |

Heterogeneity: Tau<sup>2</sup> = 725.26; Chi<sup>2</sup> = 17.55, df = 5 (P = 0.004); I<sup>2</sup> = 72%  
Test for overall effect: Z = 2.06 (P = 0.04)

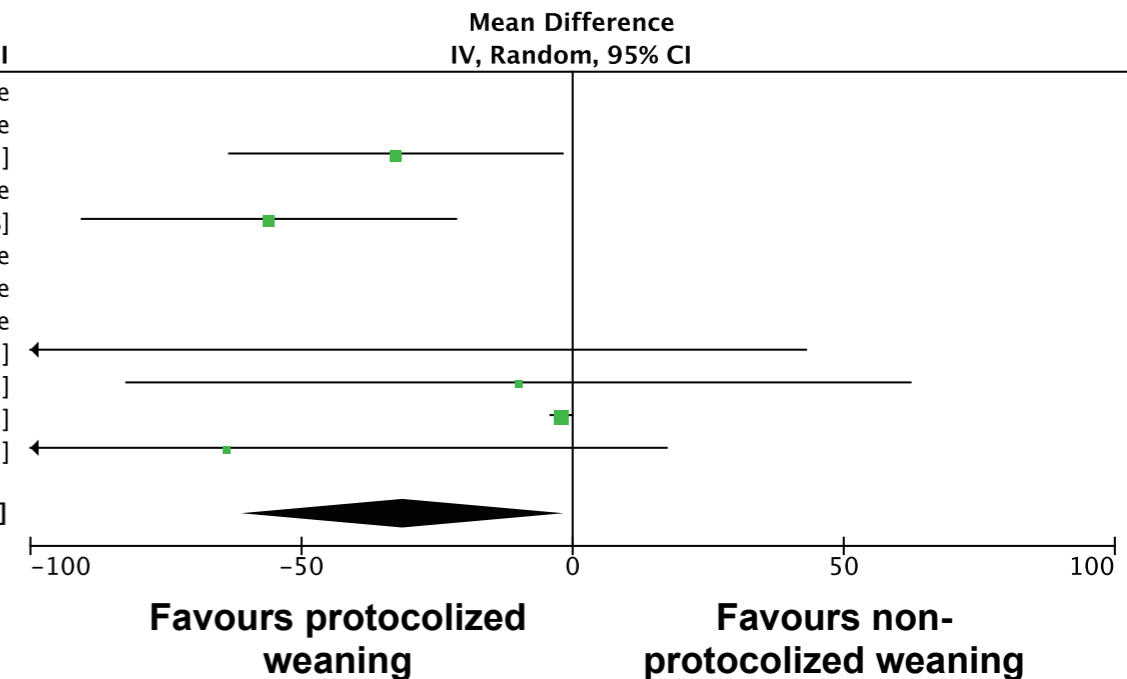

subgroup analysis  
Mechanical ventilation time  
(RCTs with professional-led weaning protocol)

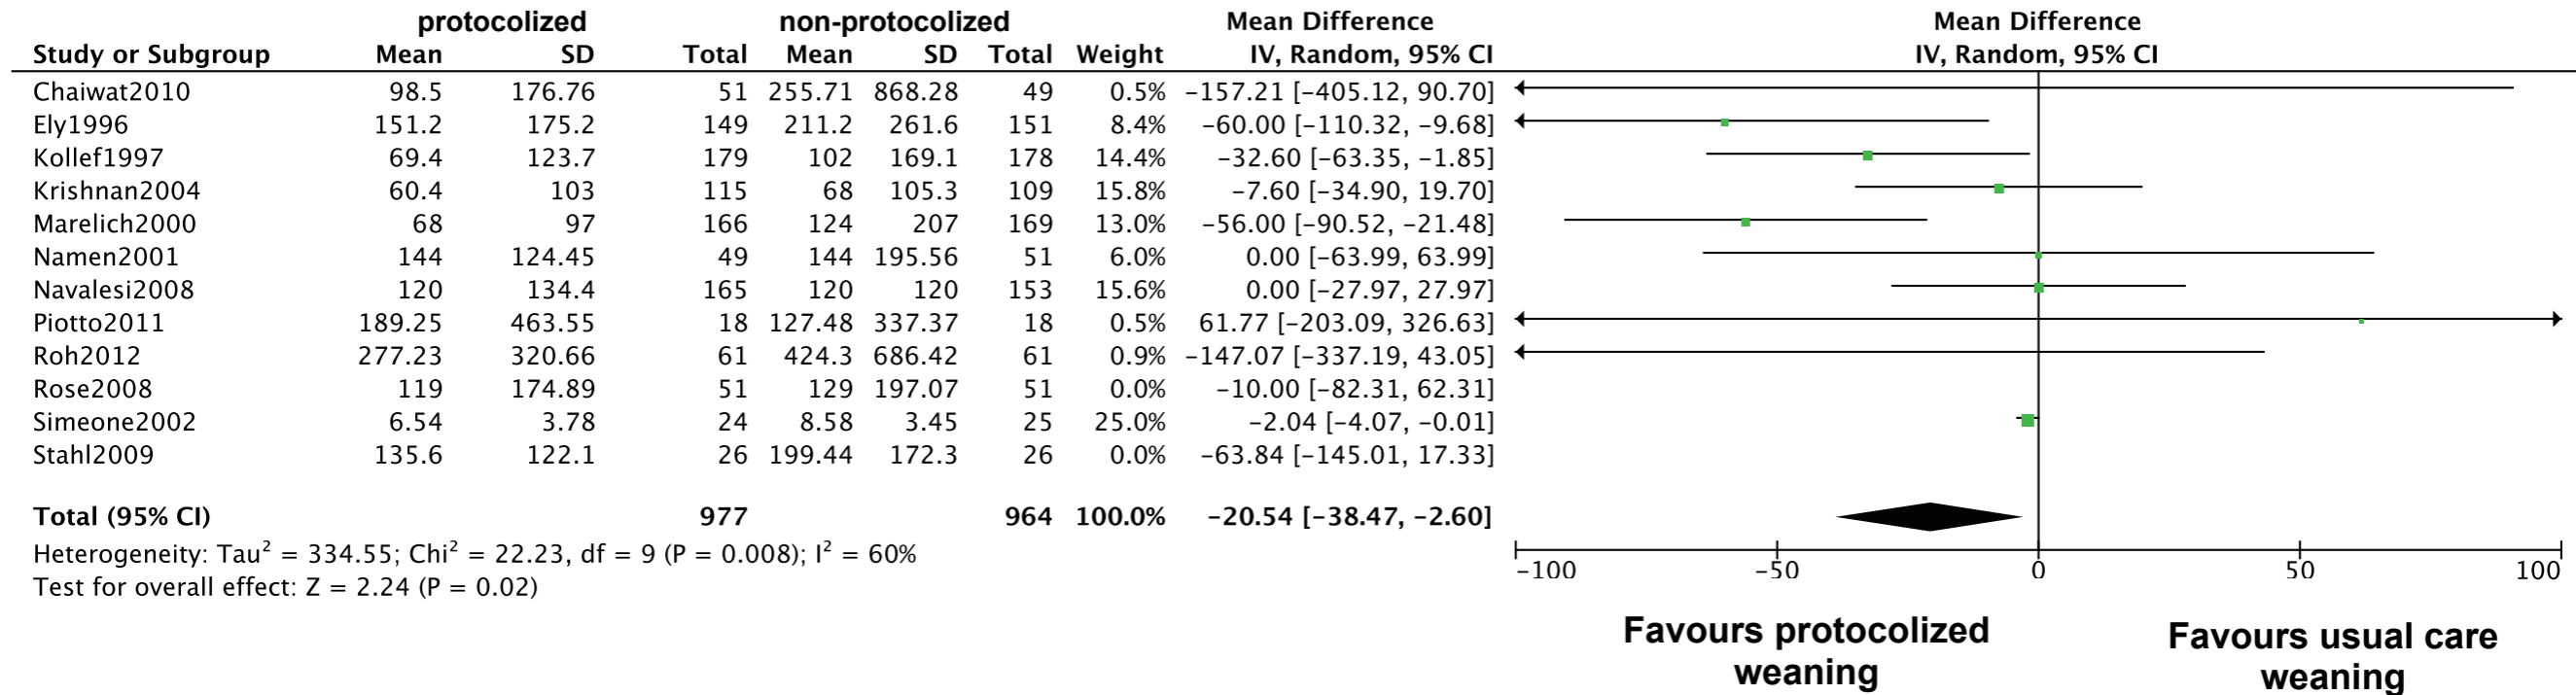

subgroup analysis  
Mechanical ventilation time  
(RCTs with computer-driven weaning protocol)

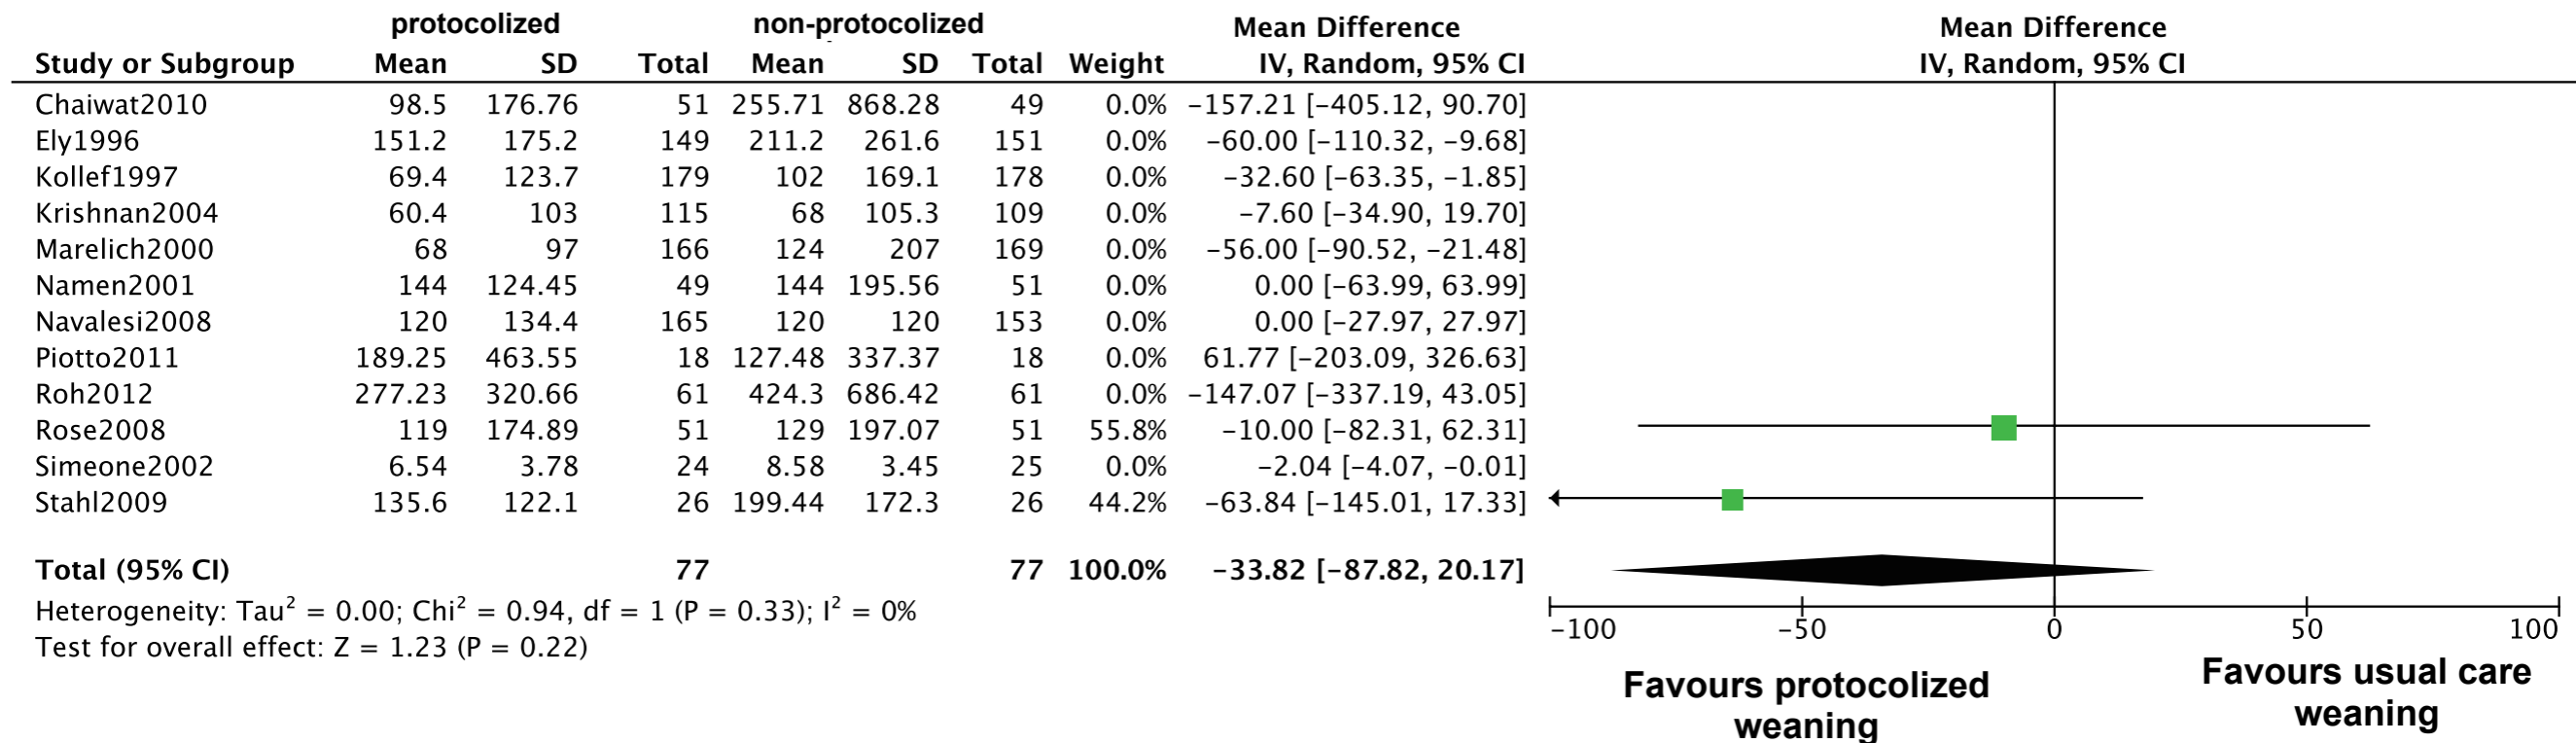

## Mechanical Ventilation Time

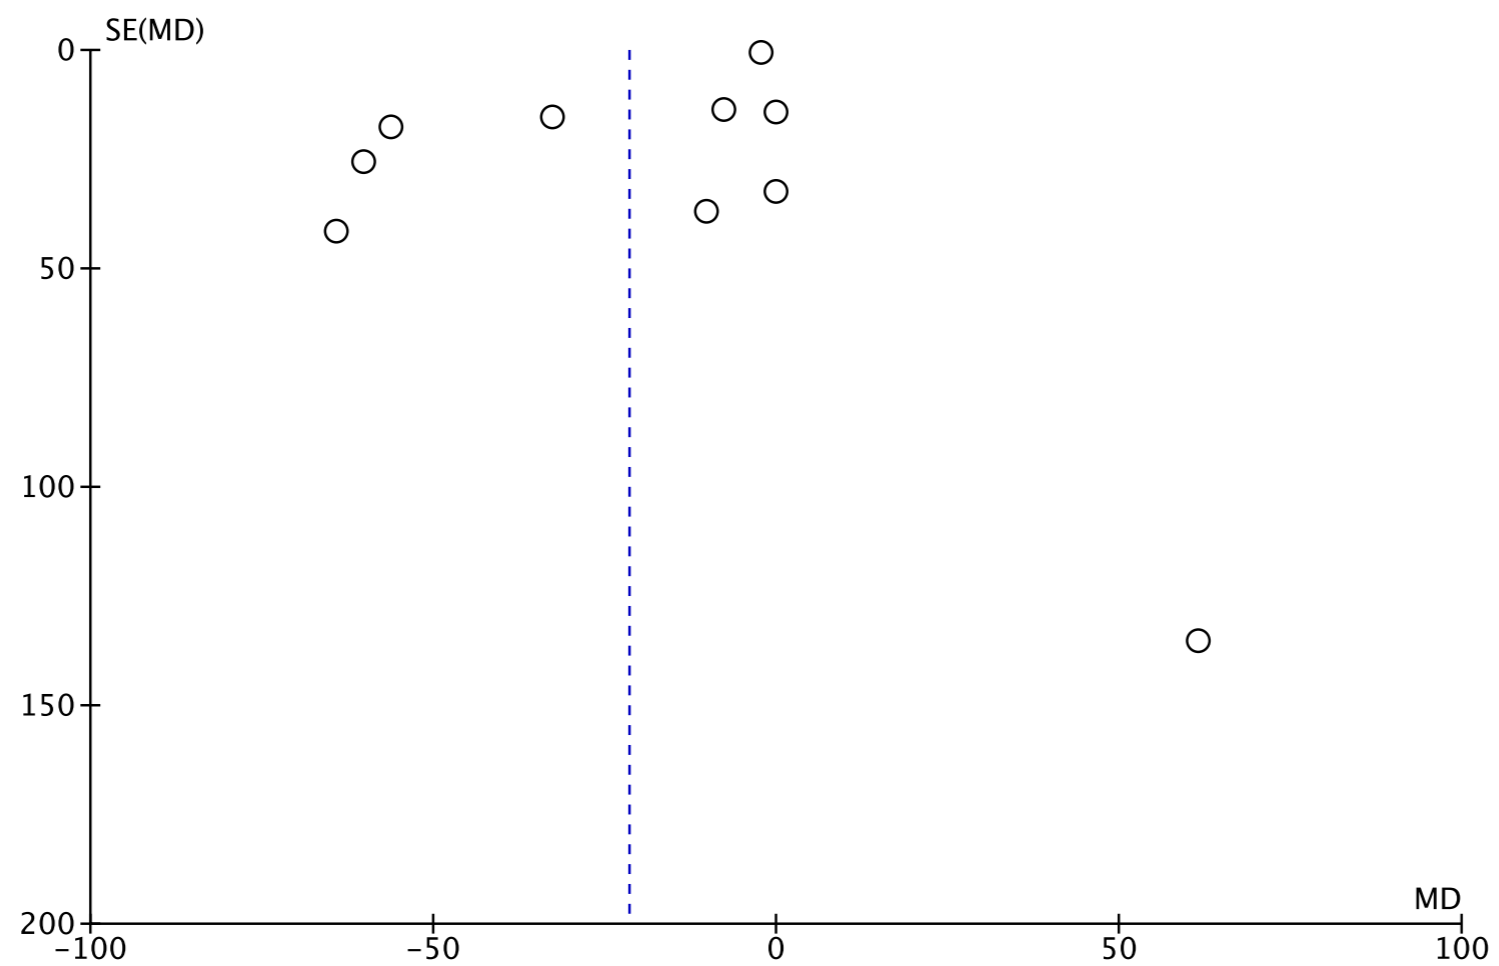

## Summary of findings:

Protocolized methods for liberation from mechanical ventilation compared to non-protocolized for adult severe patients on ventilator

Patient: population: adult severe patients on ventilator

Intervention: Protocolized methods for liberation from mechanical ventilation

Comparison: non-protocolized methods for liberation from mechanical ventilation

| Outcomes                    | Anticipated absolute effects*(95% CI) |                                                                                              | Relative effect (95% CI) | No of participants (studies) | Quality of the evidence (GRADE) | Comments |
|-----------------------------|---------------------------------------|----------------------------------------------------------------------------------------------|--------------------------|------------------------------|---------------------------------|----------|
|                             | Risk with non-protocolized            | Risk with Protocolized                                                                       |                          |                              |                                 |          |
| Mechanical Ventilation Time | The mean was 99.34                    | The mean in the intervention group was 21.51hours fewer (38.45hours fewer - 4.56hours fewer) | -                        | 2095 (12 RCTs)               | ⊕○○○<br>VERY LOW <sup>123</sup> |          |
| In hospital mortality       | <b>Study population</b>               |                                                                                              | RR 1.04<br>(0.88 ~ 1.23) | 1573 (7 RCTs)                | ⊕⊕⊕○<br>MODERATE <sup>3</sup>   |          |
|                             | 245 / 1000                            | <b>254 / 1000</b><br>(215 ~ 301)                                                             |                          |                              |                                 |          |
|                             | <b>Low risk population</b>            |                                                                                              |                          |                              |                                 |          |
|                             | 166 / 1000                            | <b>173 / 1000</b><br>(146 ~ 204)                                                             |                          |                              |                                 |          |
| Re-intubation               | <b>Study population</b>               |                                                                                              | RR 0.79<br>(0.50 ~ 1.26) | 1414 (9 RCTs)                | ⊕⊕○○<br>LOW <sup>13</sup>       |          |
|                             | 115 / 1000                            | <b>91 / 1000</b><br>(58 ~ 145)                                                               |                          |                              |                                 |          |
|                             | <b>Low risk population</b>            |                                                                                              |                          |                              |                                 |          |
|                             | 61 / 1000                             | <b>48 / 1000</b><br>(31 ~ 77)                                                                |                          |                              |                                 |          |
| Tracheostomy                | <b>Study population</b>               |                                                                                              | RR 0.72<br>(0.52 ~ 0.99) | 1277 (6 RCTs)                | ⊕⊕○○<br>LOW <sup>13</sup>       |          |
|                             | 126 / 1000                            | <b>91 / 1000</b><br>(65 ~ 125)                                                               |                          |                              |                                 |          |
|                             | <b>Low risk population</b>            |                                                                                              |                          |                              |                                 |          |
|                             | 72 / 1000                             | <b>52 / 1000</b><br>(37 ~ 71)                                                                |                          |                              |                                 |          |
|                             | <b>High risk population</b>           |                                                                                              |                          |                              |                                 |          |
|                             | 157 / 1000                            | <b>113 / 1000</b><br>(82 ~ 155)                                                              |                          |                              |                                 |          |

\*The risk in the intervention group (and its 95% confidence interval) is based on the assumed risk in the comparison group and the relative effect of the intervention (and its 95% CI).

CI: Confidence interval; RR: Risk ratio

**GRADE Working Group grades of evidence**

**High quality:** We are very confident that the true effect lies close to that of the estimate of the effect

**Moderate quality:** We are moderately confident in the effect estimate: The true effect is likely to be close to the estimate of the effect, but there is a possibility that it is substantially different

**Low quality:** Our confidence in the effect estimate is limited: The true effect may be substantially different from the estimate of the effect

**Very low quality:** We have very little confidence in the effect estimate: The true effect is likely to be substantially different from the estimate of effect

---

1. As none of the studied was blinded due to the nature of the design, the possibility of having impact on outcomes cannot be excluded and the risk of bias is high.
2.  $I^2=55\%$   $P=0.001$
3. The included patients are “critically ill patients on mechanical ventilation” not only patients with ARDS.



**CQ6:****Question:** Should protocolized methods be used for liberation from mechanical ventilation in patients with ARDS?

| Quality assessment                 |                   |                      |                      |              |             |                      | № of patients      |                  | Effect                           |                                                      | Quality                           | Importance |
|------------------------------------|-------------------|----------------------|----------------------|--------------|-------------|----------------------|--------------------|------------------|----------------------------------|------------------------------------------------------|-----------------------------------|------------|
| № of studies                       | Study design      | Risk of bias         | Inconsistency        | Indirectness | Imprecision | Other considerations | Protocolized       | non-protocolized | Relative (95% CI)                | Absolute (95% CI)                                    |                                   |            |
| Duration of mechanical ventilation |                   |                      |                      |              |             |                      |                    |                  |                                  |                                                      |                                   |            |
| 12                                 | randomised trials | serious <sup>1</sup> | serious <sup>2</sup> | not serious  | not serious | none                 | 1054               | 1041             | -                                | MD <b>21.51 fewer</b><br>(4.56 fewer to 38.45 fewer) | ⊕○○○<br>VERY LOW <sup>1,2,3</sup> | CRITICAL   |
| Hospital mortality                 |                   |                      |                      |              |             |                      |                    |                  |                                  |                                                      |                                   |            |
| 7                                  | randomised trials | not serious          | not serious          | not serious  | not serious | none                 | 203/788<br>(25.8%) | 192/785 (24.5%)  | <b>RR 1.04</b><br>(0.88 to 1.23) | 10 more per 1000 (from 29 fewer to 56 more)          | ⊕⊕⊕○<br>MODERATE <sup>3</sup>     | CRITICAL   |
|                                    |                   |                      |                      |              |             |                      |                    | 17.0%            |                                  | 7 more per 1000 (from 20 fewer to 38 more)           |                                   |            |
|                                    |                   |                      |                      |              |             |                      |                    | 33.0%            |                                  | 13 more per 1000 (from 40 fewer to 76 more)          |                                   |            |
| Re-intubation                      |                   |                      |                      |              |             |                      |                    |                  |                                  |                                                      |                                   |            |
| 9                                  | randomised trials | serious <sup>1</sup> | not serious          | not serious  | not serious | none                 | 66/712<br>(9.3%)   | 81/702 (11.5%)   | <b>RR 0.79</b><br>(0.50 to 1.26) | 24 fewer per 1000 (from 30 more to 58 fewer)         | ⊕⊕○○<br>LOW <sup>1,3</sup>        | CRITICAL   |
|                                    |                   |                      |                      |              |             |                      |                    | 6.1%             |                                  | 13 fewer per 1000 (from 16 more to 31 fewer)         |                                   |            |
|                                    |                   |                      |                      |              |             |                      |                    | 23.0%            |                                  | 48 fewer per 1000 (from 60 more to 115 fewer)        |                                   |            |
| Tracheostomy                       |                   |                      |                      |              |             |                      |                    |                  |                                  |                                                      |                                   |            |
| 6                                  | randomised trials | serious <sup>1</sup> | not serious          | not serious  | not serious | none                 | 56/641<br>(8.7%)   | 80/636 (12.6%)   | <b>RR 0.72</b><br>(0.52 to 0.99) | 35 fewer per 1000 (from 1 fewer to 60 fewer)         | ⊕⊕○○<br>LOW <sup>1,3</sup>        | IMPORTANT  |
|                                    |                   |                      |                      |              |             |                      |                    | 7.2%             |                                  | 20 fewer per 1000 (from 1 fewer to 35 fewer)         |                                   |            |
|                                    |                   |                      |                      |              |             |                      |                    | 15.7%            |                                  | 44 fewer per 1000 (from 2 fewer to 75 fewer)         |                                   |            |

MD – mean difference, RR – relative risk

RR – Relative risk

- As none of the studied was blinded due to the nature of the design, the possibility of having impact on outcomes cannot be excluded and the risk of bias is high.
- $I_2=55\%$   $P=0.001$
- The included patients are “critically ill patients on mechanical ventilation” not only patients with ARDS.

10. Evidence-to-Decision

| CQ6 : Should liberation from mechanical ventilation be protocolized in patients with ARDS? |                                                                                                 |                                                                                                                                                                                                                                                                                                                                                      |                                                                                                                                                                                                                                                                                                                                                                                                                                                                                                                                                                                                                                                                                                                          |                           |         |                     |                                   |                                    |          |                  |                    |          |                  |               |          |             |              |           |             |
|--------------------------------------------------------------------------------------------|-------------------------------------------------------------------------------------------------|------------------------------------------------------------------------------------------------------------------------------------------------------------------------------------------------------------------------------------------------------------------------------------------------------------------------------------------------------|--------------------------------------------------------------------------------------------------------------------------------------------------------------------------------------------------------------------------------------------------------------------------------------------------------------------------------------------------------------------------------------------------------------------------------------------------------------------------------------------------------------------------------------------------------------------------------------------------------------------------------------------------------------------------------------------------------------------------|---------------------------|---------|---------------------|-----------------------------------|------------------------------------|----------|------------------|--------------------|----------|------------------|---------------|----------|-------------|--------------|-----------|-------------|
| POPULATION: CRITICAL ILL PATIENTS UNDERGOING MECHANICAL VENTILATION                        |                                                                                                 |                                                                                                                                                                                                                                                                                                                                                      |                                                                                                                                                                                                                                                                                                                                                                                                                                                                                                                                                                                                                                                                                                                          |                           |         |                     |                                   |                                    |          |                  |                    |          |                  |               |          |             |              |           |             |
| INTERVENTION : EARLY TRACHEOSTOMY                                                          |                                                                                                 |                                                                                                                                                                                                                                                                                                                                                      |                                                                                                                                                                                                                                                                                                                                                                                                                                                                                                                                                                                                                                                                                                                          |                           |         |                     |                                   |                                    |          |                  |                    |          |                  |               |          |             |              |           |             |
| CRITERIA                                                                                   |                                                                                                 | JUDGEMENT                                                                                                                                                                                                                                                                                                                                            | RESEARCH EVIDENCE                                                                                                                                                                                                                                                                                                                                                                                                                                                                                                                                                                                                                                                                                                        | ADDITIONAL CONSIDERATIONS |         |                     |                                   |                                    |          |                  |                    |          |                  |               |          |             |              |           |             |
| <b>PROBLEM</b>                                                                             | Is the problem a priority?                                                                      | <input type="radio"/> No<br><input type="radio"/> Probably no<br><input checked="" type="radio"/> Probably yes<br><input type="radio"/> Yes<br><hr/> <input type="radio"/> Varies<br><input type="radio"/> Don't know                                                                                                                                | Since the process of liberation (formerly referred to as “weaning”) from mechanical ventilation is not standardized in Japan, it is likely that a large number of patients remain on mechanical ventilation longer than necessary. It is suggested that the use of protocols for liberation from mechanical ventilation will prevent unnecessarily prolonged mechanical ventilation with a significant reduction in the duration of mechanical ventilation. Many patients with ARDS require a long period of mechanical ventilation and they would greatly benefit if the use of liberation protocols is effective in shortening the period of mechanical ventilation.                                                   |                           |         |                     |                                   |                                    |          |                  |                    |          |                  |               |          |             |              |           |             |
|                                                                                            | What is the overall certainty of the evidence of effects?                                       | <input checked="" type="radio"/> Very low<br><input type="radio"/> Low<br><input type="radio"/> Moderate<br><input type="radio"/> High<br><hr/> <input type="radio"/> No included studies                                                                                                                                                            |                                                                                                                                                                                                                                                                                                                                                                                                                                                                                                                                                                                                                                                                                                                          |                           |         |                     |                                   |                                    |          |                  |                    |          |                  |               |          |             |              |           |             |
| <b>DESIRABLE AND UNDESIRABLE EFFECTS</b>                                                   | Is there important uncertainty about or variability in how much people value the main outcomes? | <input type="radio"/> Important uncertainty or variability<br><input type="radio"/> Possibly important uncertainty or variability<br><input type="radio"/> Possibly no important uncertainty or variability<br><input checked="" type="radio"/> No important uncertainty or variability<br><hr/> <input type="radio"/> No known undesirable outcomes | <b>The relative importance or values of the main outcomes of interest:</b> <table border="1" style="width: 100%; border-collapse: collapse; text-align: center;"> <thead> <tr> <th style="width: 40%;">Outcome</th> <th style="width: 20%;">Relative importance</th> <th style="width: 40%;">Certainty of the evidence (GRADE)</th> </tr> </thead> <tbody> <tr> <td>Duration of mechanical ventilation</td> <td>Critical</td> <td>⊕○○○<br/>Very low</td> </tr> <tr> <td>Hospital mortality</td> <td>Critical</td> <td>⊕⊕⊕○<br/>Moderate</td> </tr> <tr> <td>Re-intubation</td> <td>Critical</td> <td>⊕⊕○○<br/>Low</td> </tr> <tr> <td>Tracheostomy</td> <td>Important</td> <td>⊕⊕○○<br/>Low</td> </tr> </tbody> </table> |                           | Outcome | Relative importance | Certainty of the evidence (GRADE) | Duration of mechanical ventilation | Critical | ⊕○○○<br>Very low | Hospital mortality | Critical | ⊕⊕⊕○<br>Moderate | Re-intubation | Critical | ⊕⊕○○<br>Low | Tracheostomy | Important | ⊕⊕○○<br>Low |
|                                                                                            | Outcome                                                                                         | Relative importance                                                                                                                                                                                                                                                                                                                                  | Certainty of the evidence (GRADE)                                                                                                                                                                                                                                                                                                                                                                                                                                                                                                                                                                                                                                                                                        |                           |         |                     |                                   |                                    |          |                  |                    |          |                  |               |          |             |              |           |             |
| Duration of mechanical ventilation                                                         | Critical                                                                                        | ⊕○○○<br>Very low                                                                                                                                                                                                                                                                                                                                     |                                                                                                                                                                                                                                                                                                                                                                                                                                                                                                                                                                                                                                                                                                                          |                           |         |                     |                                   |                                    |          |                  |                    |          |                  |               |          |             |              |           |             |
| Hospital mortality                                                                         | Critical                                                                                        | ⊕⊕⊕○<br>Moderate                                                                                                                                                                                                                                                                                                                                     |                                                                                                                                                                                                                                                                                                                                                                                                                                                                                                                                                                                                                                                                                                                          |                           |         |                     |                                   |                                    |          |                  |                    |          |                  |               |          |             |              |           |             |
| Re-intubation                                                                              | Critical                                                                                        | ⊕⊕○○<br>Low                                                                                                                                                                                                                                                                                                                                          |                                                                                                                                                                                                                                                                                                                                                                                                                                                                                                                                                                                                                                                                                                                          |                           |         |                     |                                   |                                    |          |                  |                    |          |                  |               |          |             |              |           |             |
| Tracheostomy                                                                               | Important                                                                                       | ⊕⊕○○<br>Low                                                                                                                                                                                                                                                                                                                                          |                                                                                                                                                                                                                                                                                                                                                                                                                                                                                                                                                                                                                                                                                                                          |                           |         |                     |                                   |                                    |          |                  |                    |          |                  |               |          |             |              |           |             |
|                                                                                            |                                                                                                 |                                                                                                                                                                                                                                                                                                                                                      |                                                                                                                                                                                                                                                                                                                                                                                                                                                                                                                                                                                                                                                                                                                          |                           |         |                     |                                   |                                    |          |                  |                    |          |                  |               |          |             |              |           |             |

| <b>RESOURCES REQUIRED</b>                                                                                                                                                                                                                                                                                                                                           | <p><b>How substantial are the desirable anticipated effects?</b></p> <p> <input type="radio"/> Trivial<br/> <input type="radio"/> Small<br/> <input checked="" type="radio"/> Moderate<br/> <input type="radio"/> Large<br/> <hr/> <input type="radio"/> Varies<br/> <input type="radio"/> Don't know                 </p>                                                                                                                                                                                                                    | <p><b>Summary of findings:</b></p> <table border="1"> <thead> <tr> <th>Outcome</th> <th>Late</th> <th>Early</th> <th>Absolute effect (95% CI)</th> <th>Relative effect (RR) (95% CI)</th> </tr> </thead> <tbody> <tr> <td>Duration of mechanical ventilation</td> <td>Average 99.34 hours</td> <td>Average 77.62 hours</td> <td>Average 21.51 hours fewer (38.45 hours fewer - 4.56 hours fewer)</td> <td></td> </tr> <tr> <td rowspan="3">Hospital mortality</td> <td>245 / 1000</td> <td>254 / 1000 (215 ~ 301)</td> <td>10 more / 1000 (29 fewer- 56 more)</td> <td rowspan="3">RR 1.04 (0.88~1.23)</td> </tr> <tr> <td>166 / 1000</td> <td>173 / 1000 (146 ~ 204)</td> <td>7 more / 1000 (20 fewer- 38 more)</td> </tr> <tr> <td>331 / 1000</td> <td>344 / 1000 (291 ~ 407)</td> <td>13 more / 1000 (40 fewer-76 more)</td> </tr> <tr> <td rowspan="3">Re-intubation</td> <td>115 / 1000</td> <td>91 / 1000 (58 ~ 145)</td> <td>24 fewer / 1000 (58 fewer-30 more)</td> <td rowspan="3">RR 0.79 (0.50~1.26)</td> </tr> <tr> <td>61 / 1000</td> <td>48 / 1000 (31 ~ 77)</td> <td>13 fewer / 1000 (31 fewer-16 more)</td> </tr> <tr> <td>230 / 1000</td> <td>182 / 1000 (115 ~ 290)</td> <td>48 fewer / 1000 (115 fewer~60 more)</td> </tr> <tr> <td rowspan="3">Tracheostomy</td> <td>126 / 1000</td> <td>91 / 1000 (65 ~ 125)</td> <td>35 fewer / 1000 (60 fewer- 1 fewer)</td> <td rowspan="3">RR 0.72 (0.52~0.99)</td> </tr> <tr> <td>72 / 1000</td> <td>52 / 1000 (37 ~ 71)</td> <td>20 fewer / 1000 (35 fewer- 1 fewer)</td> </tr> <tr> <td>157 / 1000</td> <td>113 / 1000 (82 ~ 155)</td> <td>44 fewer / 1000 (75 fewer-2 fewer)</td> </tr> </tbody> </table> |                                     |                                                                  |                               | Outcome | Late | Early | Absolute effect (95% CI) | Relative effect (RR) (95% CI) | Duration of mechanical ventilation | Average 99.34 hours | Average 77.62 hours | Average 21.51 hours fewer (38.45 hours fewer - 4.56 hours fewer) |  | Hospital mortality | 245 / 1000 | 254 / 1000 (215 ~ 301) | 10 more / 1000 (29 fewer- 56 more) | RR 1.04 (0.88~1.23) | 166 / 1000 | 173 / 1000 (146 ~ 204) | 7 more / 1000 (20 fewer- 38 more) | 331 / 1000 | 344 / 1000 (291 ~ 407) | 13 more / 1000 (40 fewer-76 more) | Re-intubation | 115 / 1000 | 91 / 1000 (58 ~ 145) | 24 fewer / 1000 (58 fewer-30 more) | RR 0.79 (0.50~1.26) | 61 / 1000 | 48 / 1000 (31 ~ 77) | 13 fewer / 1000 (31 fewer-16 more) | 230 / 1000 | 182 / 1000 (115 ~ 290) | 48 fewer / 1000 (115 fewer~60 more) | Tracheostomy | 126 / 1000 | 91 / 1000 (65 ~ 125) | 35 fewer / 1000 (60 fewer- 1 fewer) | RR 0.72 (0.52~0.99) | 72 / 1000 | 52 / 1000 (37 ~ 71) | 20 fewer / 1000 (35 fewer- 1 fewer) | 157 / 1000 | 113 / 1000 (82 ~ 155) | 44 fewer / 1000 (75 fewer-2 fewer) |
|---------------------------------------------------------------------------------------------------------------------------------------------------------------------------------------------------------------------------------------------------------------------------------------------------------------------------------------------------------------------|-----------------------------------------------------------------------------------------------------------------------------------------------------------------------------------------------------------------------------------------------------------------------------------------------------------------------------------------------------------------------------------------------------------------------------------------------------------------------------------------------------------------------------------------------|------------------------------------------------------------------------------------------------------------------------------------------------------------------------------------------------------------------------------------------------------------------------------------------------------------------------------------------------------------------------------------------------------------------------------------------------------------------------------------------------------------------------------------------------------------------------------------------------------------------------------------------------------------------------------------------------------------------------------------------------------------------------------------------------------------------------------------------------------------------------------------------------------------------------------------------------------------------------------------------------------------------------------------------------------------------------------------------------------------------------------------------------------------------------------------------------------------------------------------------------------------------------------------------------------------------------------------------------------------------------------------------------------------------------------------------------------------------------------------------------------------------------------------------------------------------------------------------------------------------------------------------------------------------------|-------------------------------------|------------------------------------------------------------------|-------------------------------|---------|------|-------|--------------------------|-------------------------------|------------------------------------|---------------------|---------------------|------------------------------------------------------------------|--|--------------------|------------|------------------------|------------------------------------|---------------------|------------|------------------------|-----------------------------------|------------|------------------------|-----------------------------------|---------------|------------|----------------------|------------------------------------|---------------------|-----------|---------------------|------------------------------------|------------|------------------------|-------------------------------------|--------------|------------|----------------------|-------------------------------------|---------------------|-----------|---------------------|-------------------------------------|------------|-----------------------|------------------------------------|
|                                                                                                                                                                                                                                                                                                                                                                     | Outcome                                                                                                                                                                                                                                                                                                                                                                                                                                                                                                                                       | Late                                                                                                                                                                                                                                                                                                                                                                                                                                                                                                                                                                                                                                                                                                                                                                                                                                                                                                                                                                                                                                                                                                                                                                                                                                                                                                                                                                                                                                                                                                                                                                                                                                                                   | Early                               | Absolute effect (95% CI)                                         | Relative effect (RR) (95% CI) |         |      |       |                          |                               |                                    |                     |                     |                                                                  |  |                    |            |                        |                                    |                     |            |                        |                                   |            |                        |                                   |               |            |                      |                                    |                     |           |                     |                                    |            |                        |                                     |              |            |                      |                                     |                     |           |                     |                                     |            |                       |                                    |
|                                                                                                                                                                                                                                                                                                                                                                     | Duration of mechanical ventilation                                                                                                                                                                                                                                                                                                                                                                                                                                                                                                            | Average 99.34 hours                                                                                                                                                                                                                                                                                                                                                                                                                                                                                                                                                                                                                                                                                                                                                                                                                                                                                                                                                                                                                                                                                                                                                                                                                                                                                                                                                                                                                                                                                                                                                                                                                                                    | Average 77.62 hours                 | Average 21.51 hours fewer (38.45 hours fewer - 4.56 hours fewer) |                               |         |      |       |                          |                               |                                    |                     |                     |                                                                  |  |                    |            |                        |                                    |                     |            |                        |                                   |            |                        |                                   |               |            |                      |                                    |                     |           |                     |                                    |            |                        |                                     |              |            |                      |                                     |                     |           |                     |                                     |            |                       |                                    |
|                                                                                                                                                                                                                                                                                                                                                                     | Hospital mortality                                                                                                                                                                                                                                                                                                                                                                                                                                                                                                                            | 245 / 1000                                                                                                                                                                                                                                                                                                                                                                                                                                                                                                                                                                                                                                                                                                                                                                                                                                                                                                                                                                                                                                                                                                                                                                                                                                                                                                                                                                                                                                                                                                                                                                                                                                                             | 254 / 1000 (215 ~ 301)              | 10 more / 1000 (29 fewer- 56 more)                               | RR 1.04 (0.88~1.23)           |         |      |       |                          |                               |                                    |                     |                     |                                                                  |  |                    |            |                        |                                    |                     |            |                        |                                   |            |                        |                                   |               |            |                      |                                    |                     |           |                     |                                    |            |                        |                                     |              |            |                      |                                     |                     |           |                     |                                     |            |                       |                                    |
| 166 / 1000                                                                                                                                                                                                                                                                                                                                                          |                                                                                                                                                                                                                                                                                                                                                                                                                                                                                                                                               | 173 / 1000 (146 ~ 204)                                                                                                                                                                                                                                                                                                                                                                                                                                                                                                                                                                                                                                                                                                                                                                                                                                                                                                                                                                                                                                                                                                                                                                                                                                                                                                                                                                                                                                                                                                                                                                                                                                                 | 7 more / 1000 (20 fewer- 38 more)   |                                                                  |                               |         |      |       |                          |                               |                                    |                     |                     |                                                                  |  |                    |            |                        |                                    |                     |            |                        |                                   |            |                        |                                   |               |            |                      |                                    |                     |           |                     |                                    |            |                        |                                     |              |            |                      |                                     |                     |           |                     |                                     |            |                       |                                    |
| 331 / 1000                                                                                                                                                                                                                                                                                                                                                          |                                                                                                                                                                                                                                                                                                                                                                                                                                                                                                                                               | 344 / 1000 (291 ~ 407)                                                                                                                                                                                                                                                                                                                                                                                                                                                                                                                                                                                                                                                                                                                                                                                                                                                                                                                                                                                                                                                                                                                                                                                                                                                                                                                                                                                                                                                                                                                                                                                                                                                 | 13 more / 1000 (40 fewer-76 more)   |                                                                  |                               |         |      |       |                          |                               |                                    |                     |                     |                                                                  |  |                    |            |                        |                                    |                     |            |                        |                                   |            |                        |                                   |               |            |                      |                                    |                     |           |                     |                                    |            |                        |                                     |              |            |                      |                                     |                     |           |                     |                                     |            |                       |                                    |
| Re-intubation                                                                                                                                                                                                                                                                                                                                                       | 115 / 1000                                                                                                                                                                                                                                                                                                                                                                                                                                                                                                                                    | 91 / 1000 (58 ~ 145)                                                                                                                                                                                                                                                                                                                                                                                                                                                                                                                                                                                                                                                                                                                                                                                                                                                                                                                                                                                                                                                                                                                                                                                                                                                                                                                                                                                                                                                                                                                                                                                                                                                   | 24 fewer / 1000 (58 fewer-30 more)  | RR 0.79 (0.50~1.26)                                              |                               |         |      |       |                          |                               |                                    |                     |                     |                                                                  |  |                    |            |                        |                                    |                     |            |                        |                                   |            |                        |                                   |               |            |                      |                                    |                     |           |                     |                                    |            |                        |                                     |              |            |                      |                                     |                     |           |                     |                                     |            |                       |                                    |
|                                                                                                                                                                                                                                                                                                                                                                     | 61 / 1000                                                                                                                                                                                                                                                                                                                                                                                                                                                                                                                                     | 48 / 1000 (31 ~ 77)                                                                                                                                                                                                                                                                                                                                                                                                                                                                                                                                                                                                                                                                                                                                                                                                                                                                                                                                                                                                                                                                                                                                                                                                                                                                                                                                                                                                                                                                                                                                                                                                                                                    | 13 fewer / 1000 (31 fewer-16 more)  |                                                                  |                               |         |      |       |                          |                               |                                    |                     |                     |                                                                  |  |                    |            |                        |                                    |                     |            |                        |                                   |            |                        |                                   |               |            |                      |                                    |                     |           |                     |                                    |            |                        |                                     |              |            |                      |                                     |                     |           |                     |                                     |            |                       |                                    |
|                                                                                                                                                                                                                                                                                                                                                                     | 230 / 1000                                                                                                                                                                                                                                                                                                                                                                                                                                                                                                                                    | 182 / 1000 (115 ~ 290)                                                                                                                                                                                                                                                                                                                                                                                                                                                                                                                                                                                                                                                                                                                                                                                                                                                                                                                                                                                                                                                                                                                                                                                                                                                                                                                                                                                                                                                                                                                                                                                                                                                 | 48 fewer / 1000 (115 fewer~60 more) |                                                                  |                               |         |      |       |                          |                               |                                    |                     |                     |                                                                  |  |                    |            |                        |                                    |                     |            |                        |                                   |            |                        |                                   |               |            |                      |                                    |                     |           |                     |                                    |            |                        |                                     |              |            |                      |                                     |                     |           |                     |                                     |            |                       |                                    |
| Tracheostomy                                                                                                                                                                                                                                                                                                                                                        | 126 / 1000                                                                                                                                                                                                                                                                                                                                                                                                                                                                                                                                    | 91 / 1000 (65 ~ 125)                                                                                                                                                                                                                                                                                                                                                                                                                                                                                                                                                                                                                                                                                                                                                                                                                                                                                                                                                                                                                                                                                                                                                                                                                                                                                                                                                                                                                                                                                                                                                                                                                                                   | 35 fewer / 1000 (60 fewer- 1 fewer) | RR 0.72 (0.52~0.99)                                              |                               |         |      |       |                          |                               |                                    |                     |                     |                                                                  |  |                    |            |                        |                                    |                     |            |                        |                                   |            |                        |                                   |               |            |                      |                                    |                     |           |                     |                                    |            |                        |                                     |              |            |                      |                                     |                     |           |                     |                                     |            |                       |                                    |
|                                                                                                                                                                                                                                                                                                                                                                     | 72 / 1000                                                                                                                                                                                                                                                                                                                                                                                                                                                                                                                                     | 52 / 1000 (37 ~ 71)                                                                                                                                                                                                                                                                                                                                                                                                                                                                                                                                                                                                                                                                                                                                                                                                                                                                                                                                                                                                                                                                                                                                                                                                                                                                                                                                                                                                                                                                                                                                                                                                                                                    | 20 fewer / 1000 (35 fewer- 1 fewer) |                                                                  |                               |         |      |       |                          |                               |                                    |                     |                     |                                                                  |  |                    |            |                        |                                    |                     |            |                        |                                   |            |                        |                                   |               |            |                      |                                    |                     |           |                     |                                    |            |                        |                                     |              |            |                      |                                     |                     |           |                     |                                     |            |                       |                                    |
|                                                                                                                                                                                                                                                                                                                                                                     | 157 / 1000                                                                                                                                                                                                                                                                                                                                                                                                                                                                                                                                    | 113 / 1000 (82 ~ 155)                                                                                                                                                                                                                                                                                                                                                                                                                                                                                                                                                                                                                                                                                                                                                                                                                                                                                                                                                                                                                                                                                                                                                                                                                                                                                                                                                                                                                                                                                                                                                                                                                                                  | 44 fewer / 1000 (75 fewer-2 fewer)  |                                                                  |                               |         |      |       |                          |                               |                                    |                     |                     |                                                                  |  |                    |            |                        |                                    |                     |            |                        |                                   |            |                        |                                   |               |            |                      |                                    |                     |           |                     |                                    |            |                        |                                     |              |            |                      |                                     |                     |           |                     |                                     |            |                       |                                    |
| <p><b>How substantial are the undesirable anticipated effects?</b></p> <p> <input type="radio"/> Large<br/> <input type="radio"/> Moderate<br/> <input checked="" type="radio"/> Small<br/> <input type="radio"/> Trivial<br/> <hr/> <input type="radio"/> Varies<br/> <input type="radio"/> Don't know                 </p>                                        | <p><b>Does the balance between desirable and undesirable effects favor the intervention or the comparison?</b></p> <p> <input type="radio"/> Favors the comparison<br/> <input checked="" type="radio"/> Probably favors the comparison<br/> <input type="radio"/> Does not favor either the intervention or the comparison<br/> <input type="radio"/> Probably favors the intervention<br/> <input type="radio"/> Favors the intervention<br/> <hr/> <input type="radio"/> Varies<br/> <input type="radio"/> Don't know                 </p> | <p><b>Summary:</b> The meta-analysis shows a significantly shorter duration of mechanical ventilation in patients liberated according to a protocol compared to patients liberated without a protocol. It also shows that protocolized liberation from mechanical ventilation significantly reduced the number of tracheostomies needed</p>                                                                                                                                                                                                                                                                                                                                                                                                                                                                                                                                                                                                                                                                                                                                                                                                                                                                                                                                                                                                                                                                                                                                                                                                                                                                                                                            |                                     |                                                                  |                               |         |      |       |                          |                               |                                    |                     |                     |                                                                  |  |                    |            |                        |                                    |                     |            |                        |                                   |            |                        |                                   |               |            |                      |                                    |                     |           |                     |                                    |            |                        |                                     |              |            |                      |                                     |                     |           |                     |                                     |            |                       |                                    |
| <p><b>How large are the resource requirements (costs)?</b></p> <p> <input type="radio"/> Large costs<br/> <input type="radio"/> Moderate costs<br/> <input type="radio"/> Negligible costs and savings<br/> <input type="radio"/> Moderate savings<br/> <input type="radio"/> Large savings<br/> <hr/> <input checked="" type="radio"/> Varies                 </p> | <p>The cost of using liberation protocols is expected to be minimal except when protocols programmed into the ventilators are used.</p>                                                                                                                                                                                                                                                                                                                                                                                                       |                                                                                                                                                                                                                                                                                                                                                                                                                                                                                                                                                                                                                                                                                                                                                                                                                                                                                                                                                                                                                                                                                                                                                                                                                                                                                                                                                                                                                                                                                                                                                                                                                                                                        |                                     |                                                                  |                               |         |      |       |                          |                               |                                    |                     |                     |                                                                  |  |                    |            |                        |                                    |                     |            |                        |                                   |            |                        |                                   |               |            |                      |                                    |                     |           |                     |                                    |            |                        |                                     |              |            |                      |                                     |                     |           |                     |                                     |            |                       |                                    |

|                      |                                                                                                  |                                                                                                                                                                                                                                                                                                                                                                                                |                                                                                                                                                                                                                                     |  |
|----------------------|--------------------------------------------------------------------------------------------------|------------------------------------------------------------------------------------------------------------------------------------------------------------------------------------------------------------------------------------------------------------------------------------------------------------------------------------------------------------------------------------------------|-------------------------------------------------------------------------------------------------------------------------------------------------------------------------------------------------------------------------------------|--|
|                      |                                                                                                  | <input type="radio"/> Don't know                                                                                                                                                                                                                                                                                                                                                               |                                                                                                                                                                                                                                     |  |
|                      | <b>Does the cost-effectiveness of the intervention favor the intervention or the comparison?</b> | <input type="radio"/> Favors the comparison<br><input type="radio"/> Probably favors the comparison<br><input type="radio"/> Does not favor either the intervention or the comparison<br><input type="radio"/> Probably favors the intervention<br><input type="radio"/> Favors the intervention<br><hr/> <input checked="" type="radio"/> Varies<br><input type="radio"/> No included studies | The benefits are expected to outweigh the costs or resources needed when liberation protocols programmed into the ventilator are not used. Development of protocols and education of staff to apply a protocol may incur some cost. |  |
| <b>EQUITY</b>        | <b>What would be the impact on health equity?</b>                                                | <input type="radio"/> Reduced<br><input checked="" type="radio"/> Probably reduced<br><input type="radio"/> Probably no impact<br><input type="radio"/> Probably increased<br><input type="radio"/> Increased<br><hr/> <input type="radio"/> Varies<br><input type="radio"/> Don't know                                                                                                        | There may be some difficulty in developing and initiating protocols among facilities.                                                                                                                                               |  |
| <b>ACCEPTABILITY</b> | <b>Is the intervention acceptable to key stakeholders?</b>                                       | <input type="radio"/> No<br><input type="radio"/> Probably no<br><input checked="" type="radio"/> Probably yes<br><input type="radio"/> Yes<br><hr/> <input type="radio"/> Varies<br><input type="radio"/> Don't know                                                                                                                                                                          | Since the patients' burden and incidence of adverse events are not likely to increase and the time needed for mechanical ventilation is expected to decrease by applying the protocols, it should be acceptable.                    |  |
| <b>FEASIBILITY</b>   | <b>Is the intervention feasible implement?</b>                                                   | <input type="radio"/> No<br><input type="radio"/> Probably no<br><input checked="" type="radio"/> Probably yes<br><input type="radio"/> Yes<br><hr/> <input type="radio"/> Varies<br><input type="radio"/> Don't know                                                                                                                                                                          | It is feasible to initiate and establish liberation protocols.                                                                                                                                                                      |  |

## Recommendations

### CQ6 : Should liberation from mechanical ventilation be protocolized in patients with ARDS?

|                         |                                                                                          |                                                                                           |                                                                                                    |                                                                                           |                                                                                          |
|-------------------------|------------------------------------------------------------------------------------------|-------------------------------------------------------------------------------------------|----------------------------------------------------------------------------------------------------|-------------------------------------------------------------------------------------------|------------------------------------------------------------------------------------------|
| Balance of consequences | Undesirable consequences <i>clearly outweigh</i> desirable consequences in most settings | Undesirable consequences <i>probably outweigh</i> desirable consequences in most settings | The balance between desirable and undesirable consequences is closely <i>balanced or uncertain</i> | Desirable consequences <i>probably outweigh</i> undesirable consequences in most settings | Desirable consequences <i>clearly outweigh</i> undesirable consequences in most settings |
| Judgement               | ○                                                                                        | ○                                                                                         | ○                                                                                                  | ●                                                                                         | ○                                                                                        |

|                        |                                           |                                     |                                 |                                   |
|------------------------|-------------------------------------------|-------------------------------------|---------------------------------|-----------------------------------|
| Type of recommendation | We recommend against offering this option | We suggest not offering this option | We suggest offering this option | We recommend offering this option |
| Judgement              | ○                                         | ○                                   | ●                               | ○                                 |

**Recommendation:** We suggest using protocolized methods for liberation from mechanical ventilation in patients with ARDS (Grade 2D, Strength of recommendation “weak recommendation” / Quality of evidence “Very low”).

●Supplementary statements:  
When developing protocols for liberation, the level of knowledge and skills of the personnel who apply the protocol in each facility must be taken into account. Education and training regarding mechanical ventilation are required, especially for non-physician staff members. A previous meta-analysis<sup>1</sup> showed a reduction in the duration of mechanical ventilation for patients in medical, surgical and medical/surgical ICUs but not in a neurological ICU.

**Justification**

**Question:** Should liberation from mechanical ventilation be protocolized in patients with ARDS?  
**Patients:** CRITICAL ILL PATIENTS UNDERGOING MECHANICAL VENTILATION  
**Interventions:** Protocolized liberation  
**Comparison:** Non-protocolized liberation  
**Outcomes:** Duration of mechanical ventilation, hospital mortality, re-intubation, tracheostomy

**Summary of the evidence:** Since this systematic review revealed that there are no previous studies which evaluated only patients with ARDS, we included 12 RCTs that included critical ill patients undergoing mechanical ventilation in this meta-analysis. The meta-analysis shows a significantly shorter duration of mechanical ventilation in patients liberated according to a protocol compared to patients liberated without a protocol (average difference -21.51 hours 95%CI -38.45 - -4.56 hours). It also shows that protocolized liberation from mechanical ventilation significantly reduced the number of tracheostomies needed (RR 0.72, 95%CI 0.52-0.99) . There were no significant differences in the incidence of adverse events between the two groups (re-intubation : RR 0.79, 95%CI 0.50-1.26, hospital mortality : RR 1.04, 95%CI 0.88-1.23) .

**Quality of the evidence:** The results of this meta-analysis must be cautiously applied to clinical practice as it includes studies that included “critically ill patients on mechanical ventilation” not “patients with ARDS” resulting in the inclusion of a large variety of patients, including those in medical, surgical and neurological ICUs. The heterogeneity of the analysis is high (p=0.01, I<sup>2</sup>=55%) leading to downgrading of the evidence. As none of the studies was blinded due to their design, the possibility of having an impact on outcomes cannot be excluded and the risk of bias is high. As a result, the confidence level on the overall quality of evidence was rated as “very low”.

**Judgement of benefit and harm, resources and cost:** The benefits are expected to outweigh the harms, as the initiation of liberation protocols is less likely to increase the patients’ burden or incidence of adverse events. The cost of using liberation protocols is expected to be minimal except when protocols programmed into the ventilators are used. Development of

|                                                 |                                                                                                                                                                                                                                                                                                                                                                                                                                                                                                                                                                                                                                                                                                                                        |
|-------------------------------------------------|----------------------------------------------------------------------------------------------------------------------------------------------------------------------------------------------------------------------------------------------------------------------------------------------------------------------------------------------------------------------------------------------------------------------------------------------------------------------------------------------------------------------------------------------------------------------------------------------------------------------------------------------------------------------------------------------------------------------------------------|
|                                                 | <p>protocols and education of staff to apply a protocol may incur some cost.</p> <p><b>Recommendations:</b> We suggest using protocolized methods for liberation from mechanical ventilation in patients with ARDS (Grade 2D, Strength of recommendation “weak recommendation” / Quality of evidence “Very low”).</p> <p><b>Additional considerations:</b> A previous meta-analysis<sup>1</sup> showed a reduction in the duration of mechanical ventilation for patients in medical, surgical and medical/surgical ICUs but not in a neurological ICU.</p>                                                                                                                                                                            |
| <b>Subgroup considerations</b>                  | <p>Liberation protocols are divided into two groups, “step-wise reduction of mechanical ventilator support protocols” and “spontaneous breathing trial (SBT) protocols”. Another way to classify liberation protocols is to divide them into “professional-led protocols” where staff such as nurses or respiratory therapists change ventilator settings based on protocols and “computer-driven protocols” where the settings are changed automatically based on computer programs built into the ventilators. Although it was decided that another panel discussion be held to reassess the recommendation after subgroup analyses are conducted, the recommendation did not require any change based on the subgroup analyses.</p> |
| <b>Implementation considerations</b>            | <p>When developing protocols for liberation, the level of knowledge and skills of the personnel who apply the protocol in each facility must be taken into account. Education and training regarding mechanical ventilation are required, especially for non-physician staff members.</p>                                                                                                                                                                                                                                                                                                                                                                                                                                              |
| <b>Monitoring and evaluation considerations</b> | <p>In addition to respiratory and hemodynamic parameters, respiratory patterns and patient’s facial expressions need to be observed.</p>                                                                                                                                                                                                                                                                                                                                                                                                                                                                                                                                                                                               |
| <b>Research possibilities</b>                   | <p>Studies including only patients with ARDS are needed. It is also necessary to identify subgroups which may benefit more or less from liberation protocols.</p>                                                                                                                                                                                                                                                                                                                                                                                                                                                                                                                                                                      |

## References

1. Blackwood B, Burns KE, Cardwell CR, et al. Protocolized versus non-protocolized weaning for reducing the duration of mechanical ventilation in critically ill adult patients. *Cochrane Database Syst Rev* 11: CD006904, 2014. PMID 25375085

### CQ07. Study flow diagram

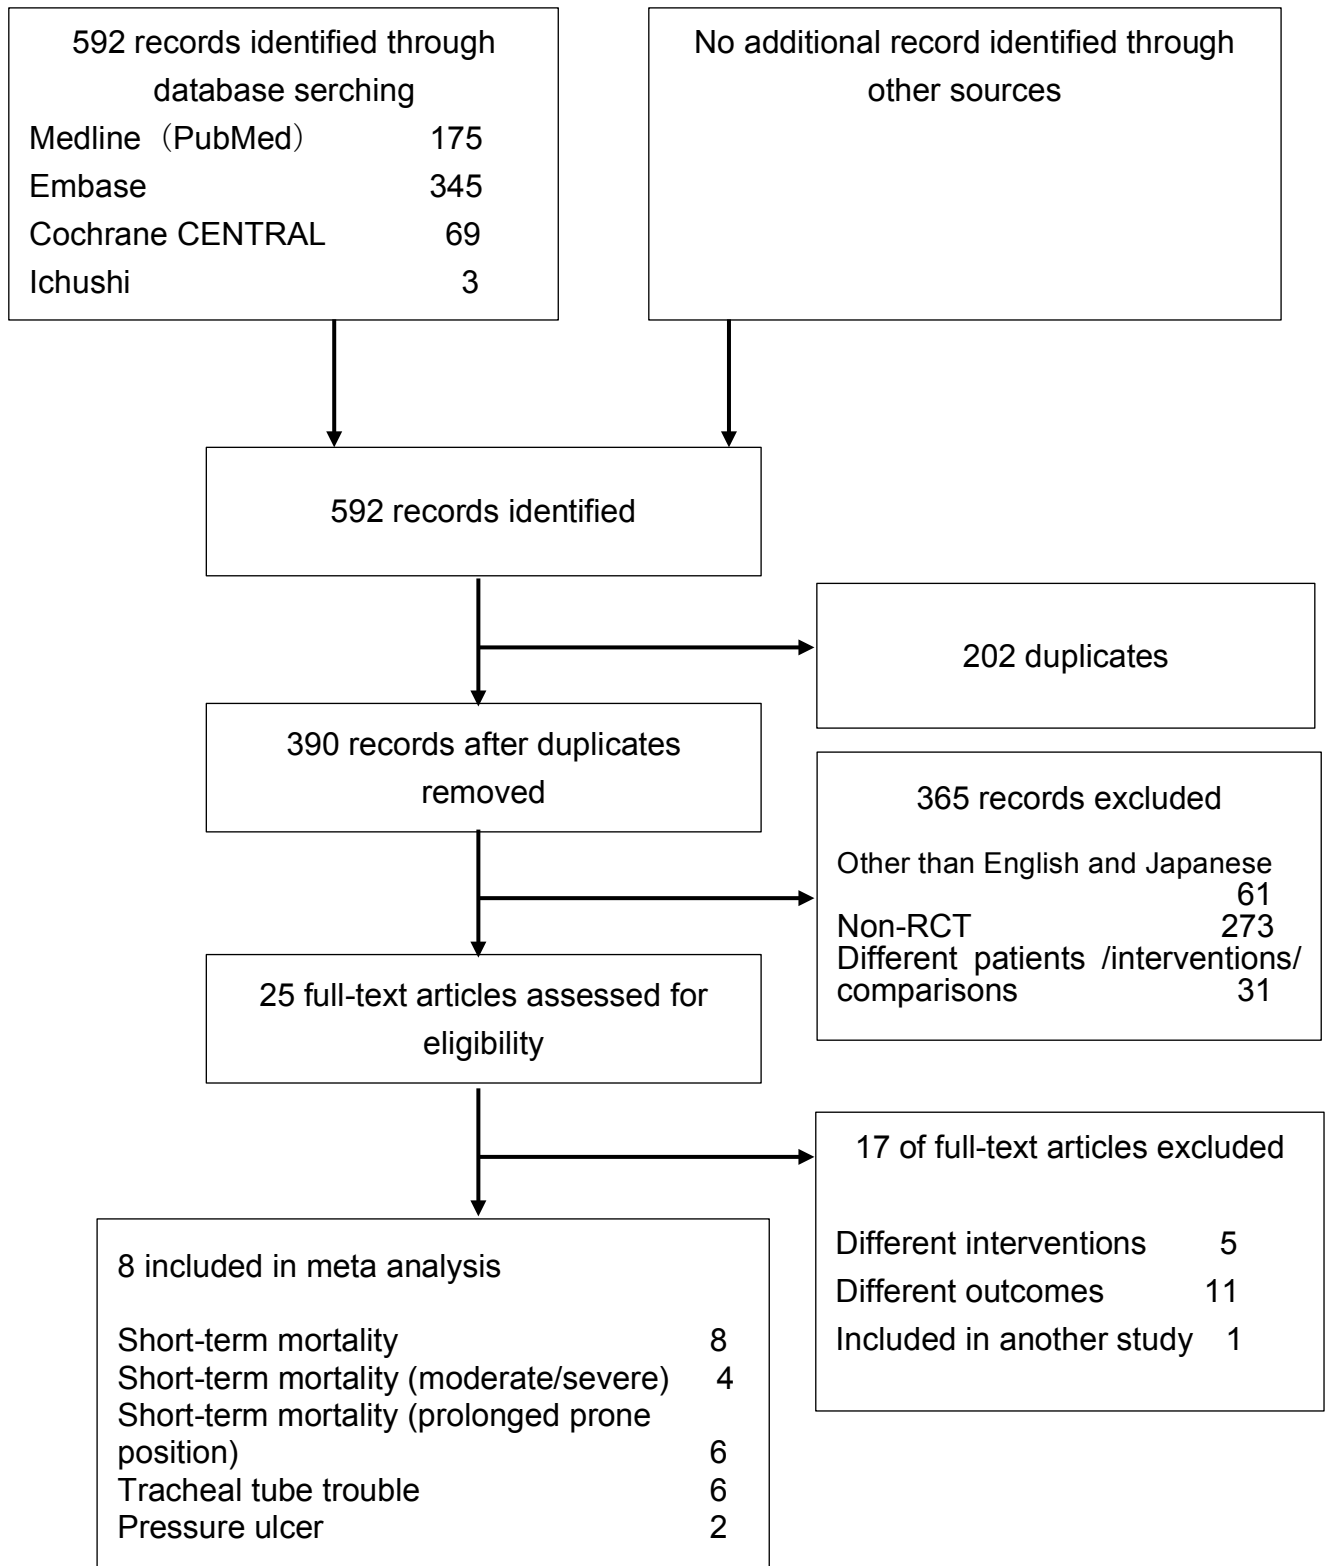

| Outcome |                            | Short term mortality                               |                                                         | risk of bias                                          |                                                                                                                                       | not serious (0)                         |                                              |                                                                                                                                                              |                                              |
|---------|----------------------------|----------------------------------------------------|---------------------------------------------------------|-------------------------------------------------------|---------------------------------------------------------------------------------------------------------------------------------------|-----------------------------------------|----------------------------------------------|--------------------------------------------------------------------------------------------------------------------------------------------------------------|----------------------------------------------|
| 番号      | 著者名 発表年<br>(Forest plot表示) | risk of bias評価                                     |                                                         |                                                       |                                                                                                                                       |                                         |                                              |                                                                                                                                                              |                                              |
|         |                            | ランダム割付順序の生成<br>random sequence generation          | 割り付けの隠蔽化<br>allocation concealment                      | ブラインド<br>blinding                                     |                                                                                                                                       | 不完全なアウトカムデータ<br>incomplete outcome data | 選択されたアウトカムの報告<br>selective outcome reporting | その他のバイアス<br>Other sources of bias                                                                                                                            | 研究内でのバイアスのリスク<br>Risk of bias within a study |
|         |                            |                                                    |                                                         | 研究参加者と治療提供者<br>participants and personnel             | アウトカム評価者<br>outcome assessors                                                                                                         |                                         |                                              |                                                                                                                                                              |                                              |
| 1       | Beuret 2002                | Unclear risk                                       | Unclear risk                                            | Unclear risk                                          | Low risk                                                                                                                              | Low risk                                | Unclear risk                                 | High risk                                                                                                                                                    | Unclear risk                                 |
| 2       | Fernandez 2008             | Low risk                                           | Low risk                                                | Unclear risk                                          | Low risk                                                                                                                              | Low risk                                | Unclear risk                                 | High risk                                                                                                                                                    | Unclear risk                                 |
| 3       | Gattinoni 2001             | Low risk                                           | Low risk                                                | Unclear risk                                          | Low risk                                                                                                                              | Low risk                                | Unclear risk                                 | High risk                                                                                                                                                    | Low risk                                     |
| 4       | Guerin 2004                | Low risk                                           | Low risk                                                | High risk                                             | Low risk                                                                                                                              | Low risk                                | Unclear risk                                 | High risk                                                                                                                                                    | Unclear risk                                 |
| 5       | Guerin 2013                | Low risk                                           | Low risk                                                | High risk                                             | Low risk                                                                                                                              | Low risk                                | Low risk                                     | Low risk                                                                                                                                                     | Low risk                                     |
| 6       | Mancebo 2006               | Low risk                                           | Low risk                                                | Unclear risk                                          | Low risk                                                                                                                              | Low risk                                | Unclear risk                                 | High risk                                                                                                                                                    | Unclear risk                                 |
| 7       | Taccone 2009               | Low risk                                           | Low risk                                                | Unclear risk                                          | Low risk                                                                                                                              | Low risk                                | Low risk                                     | High risk                                                                                                                                                    | Low risk                                     |
| 8       | Voggenreiter 2005          | Low risk                                           | Low risk                                                | Unclear risk                                          | Low risk                                                                                                                              | Low risk                                | Unclear risk                                 | Low risk                                                                                                                                                     | Low risk                                     |
|         |                            |                                                    |                                                         |                                                       |                                                                                                                                       |                                         |                                              |                                                                                                                                                              |                                              |
| 番号      | 著者名 発表年<br>(Forest plot表示) | risk of biasコメント                                   |                                                         |                                                       |                                                                                                                                       |                                         |                                              |                                                                                                                                                              |                                              |
| 1       | Beuret 2002                | 記載なし                                               | 記載なし                                                    | 記載なし                                                  | 記載ないが影響なし                                                                                                                             | Intention to treat analysisで、欠損数<10%    | Pre-registration dataなし                      | crossover許容                                                                                                                                                  | unclearが多く、crossoverの影響も不明                   |
| 2       | Fernandez 2008             | computer-generated random sequence                 | a centralized call center                               | 記載なし                                                  | 記載ないが影響なし                                                                                                                             | Intention to treat analysisで、欠損数<10%    | Pre-registration dataなし                      | 必要サンプルサイズは250であったが、初年度に42人しか参加がなく、早期中止 crossover許容                                                                                                           | 早期中止やcrossoverの影響が不明                         |
| 3       | Gattinoni 2001             | permuted-block algorithm                           | centrally by telephone                                  | 記載なし                                                  | 記載ないが影響なし                                                                                                                             | Intention to treat analysisで、欠損数<10%    | Pre-registration dataなし                      | 先行1年で次第に参加者が減り、必要サンプルサイズは死亡者95人であったが、70人の時点で早期中止                                                                                                             | 早期中止されたものの、8割弱リクルートできており、結果の解釈への影響は大きくはない    |
| 4       | Guerin 2004                | computer-generated                                 | sequentially numbered, opaque, and sealed envelopes     | data collectors were not blinded                      | outcomes assessors were not blinded,ただし影響なし                                                                                           | Intention to treat analysisで、欠損数<10%    | Pre-registration dataなし                      | crossover許容                                                                                                                                                  | crossoverの影響不明                               |
| 5       | Guerin 2013                | computer-generated                                 | centralized Web-based management system                 | data collectors were aware of study group assignments | outcomes assessors were not aware of study group assignments                                                                          | Intention to treat analysisで、欠損数<10%    | Pre-registration dataの通り                     | 特記事項なし (COIあり) crossoverなし                                                                                                                                   | 治療者のblindingはないが影響は小さい                       |
| 6       | Mancebo 2006               | computer-generated                                 | concealment was performed using sealed opaque envelopes | 記載なし                                                  | 記載ないが影響なし                                                                                                                             | Intention to treat analysisで、欠損数<10%    | Pre-registration dataなし                      | 必要サンプルサイズは200であったが、登録数の減少により、早期中止 crossover許容<br>著者の一人はRotaprone Bed製造業者(KCI)のコンサルタントで報酬を得ているが、この研究にRotaprone Bedは使用されておらず、製造業者の関与なし                         | 早期中止や利益相反の研究への影響は不明                          |
| 7       | Taccone 2009               | computer-generated with a permuted-block algorithm | a centralized telephone randomization system            | 記載なし                                                  | outcome data were available during the study only to the members of the data and safety monitoring board for interim analysis,ただし影響なし | Intention to treat analysisで、欠損数<10%    | Pre-registration dataの通り                     | crossover許容<br>Rotaprone rotational bedの製造業者(KCI)により同ベッドが無料で提供され、本研究の20施設で使用された。KCIは研究のコーディネーターや研究者の定例会議の秘書業務を担ったが、研究自体への関与なし<br>著者の一人はKCI本部諮問会議委員として報酬を得ている | crossoverや利益相反の研究への影響は不明                     |
| 8       | Voggenreiter 2005          | permuted-block algorithm                           | centrally by telephone                                  | 記載なし                                                  | 記載ないが影響なし                                                                                                                             | Intention to treat analysisで、欠損数<10%    | Pre-registration dataなし                      | 特記事項なし                                                                                                                                                       | unclearな要素もあるが、全体的にriskは低い                   |



| Outcome |                            | Short-term mortality (moderate/ severe)            |                                                         | risk of bias                                          |                                                                                                                                        | not serious (0)                         |                                              |                                                                                                                                                               |                                              |
|---------|----------------------------|----------------------------------------------------|---------------------------------------------------------|-------------------------------------------------------|----------------------------------------------------------------------------------------------------------------------------------------|-----------------------------------------|----------------------------------------------|---------------------------------------------------------------------------------------------------------------------------------------------------------------|----------------------------------------------|
| 番号      | 著者名 発表年<br>(Forest plot表示) | risk of bias評価                                     |                                                         |                                                       |                                                                                                                                        |                                         |                                              |                                                                                                                                                               |                                              |
|         |                            | ランダム割付順番の生成<br>random sequence generation          | 割り付けの隠蔽化<br>allocation concealment                      | ブラインド<br>blinding                                     |                                                                                                                                        | 不完全なアウトカムデータ<br>incomplete outcome data | 選択されたアウトカムの報告<br>selective outcome reporting | その他のバイアス<br>Other sources of bias                                                                                                                             | 研究内でのバイアスのリスク<br>Risk of bias within a study |
|         |                            |                                                    |                                                         | 研究参加者と治療提供者<br>participants and personnel             | アウトカム評価者<br>outcome assessors                                                                                                          |                                         |                                              |                                                                                                                                                               |                                              |
| 1       | Fernandez 2008             | Low risk                                           | Low risk                                                | Unclear risk                                          | Low risk                                                                                                                               | Low risk                                | Unclear risk                                 | High risk                                                                                                                                                     | Unclear risk                                 |
| 2       | Guerin 2013                | Low risk                                           | Low risk                                                | High risk                                             | Low risk                                                                                                                               | Low risk                                | Low risk                                     | Low risk                                                                                                                                                      | Low risk                                     |
| 3       | Mancebo 2006               | Low risk                                           | Low risk                                                | Unclear risk                                          | Low risk                                                                                                                               | Low risk                                | Unclear risk                                 | High risk                                                                                                                                                     | Unclear risk                                 |
| 4       | Taccone 2009               | Low risk                                           | Low risk                                                | Unclear risk                                          | Low risk                                                                                                                               | Low risk                                | Low risk                                     | High risk                                                                                                                                                     | Low risk                                     |
|         |                            |                                                    |                                                         |                                                       |                                                                                                                                        |                                         |                                              |                                                                                                                                                               |                                              |
| 番号      | 著者名 発表年<br>(Forest plot表示) | risk of biasコメント                                   |                                                         |                                                       |                                                                                                                                        |                                         |                                              |                                                                                                                                                               |                                              |
| 1       | Fernandez 2008             | computer-generated random sequence                 | a centralized call center                               | 記載なし                                                  | 記載ないが影響なし                                                                                                                              | Intention to treat analysisで、欠損数<10%    | Pre-registration dataなし                      | 必要サンプルサイズは250であったが、初年度に42人しか参加がなく、早期中止 crossover許容                                                                                                            | 早期中止やcrossoverの影響が不明                         |
| 2       | Guerin 2013                | computer-generated                                 | centralized Web-based management system                 | data collectors were aware of study group assignments | outcomes assessors were not aware of study group assignments                                                                           | Intention to treat analysisで、欠損数<10%    | Pre-registration dataの通り                     | 特記事項なし(COIあり) crossoverなし                                                                                                                                     | 治療者のblindingはないが影響は小さい                       |
| 3       | Mancebo 2006               | computer-generated                                 | concealment was performed using sealed opaque envelopes | 記載なし                                                  | 記載ないが影響なし                                                                                                                              | Intention to treat analysisで、欠損数<10%    | Pre-registration dataなし                      | 必要サンプルサイズは200であったが、登録数の減少により、早期中止 crossover許容<br>著者の一人はRotaprone Bed製造業者(KCI)のコンサルタントで報酬を得ているが、この研究にRotaprone Bedは使用されておらず、製造業者の関与なし                          | 早期中止や利益相反の研究への影響は不明                          |
| 4       | Taccone 2009               | computer-generated with a permuted-block algorithm | a centralized telephone randomization system            | 記載なし                                                  | outcome data were available during the study only to the members of the data and safety monitoring board for interim analysis, ただし影響なし | Intention to treat analysisで、欠損数<10%    | Pre-registration dataの通り                     | crossover許容<br>Rotaprone rotational bedの製造業者(KCI)により同ベッドが無料で提供され、本研究の20施設で使用された。KCIは研究のコーディネーターや研究者の定例会議の秘書業務を担当したが、研究自体への関与なし<br>著者の一人はKCI本部諮問会議委員として報酬を得ている | crossoverや利益相反の研究への影響は不明                     |

| Outcome |                            | Short-term mortality (prolonged prone)             |                                                         | risk of bias                                          |                                                                                                                                        | not serious (0)                         |                                              |                                                                                                                                                                  |                                              |
|---------|----------------------------|----------------------------------------------------|---------------------------------------------------------|-------------------------------------------------------|----------------------------------------------------------------------------------------------------------------------------------------|-----------------------------------------|----------------------------------------------|------------------------------------------------------------------------------------------------------------------------------------------------------------------|----------------------------------------------|
| 番号      | 著者名 発表年<br>(Forest plot表示) | risk of bias評価                                     |                                                         |                                                       |                                                                                                                                        |                                         |                                              |                                                                                                                                                                  |                                              |
|         |                            | ランダム割付順序の生成<br>random sequence generation          | 割り付けの隠蔽化<br>allocation concealment                      | ブラインド<br>blinding                                     |                                                                                                                                        | 不完全なアウトカムデータ<br>incomplete outcome data | 選択されたアウトカムの報告<br>selective outcome reporting | その他のバイアス<br>Other sources of bias                                                                                                                                | 研究内でのバイアスのリスク<br>Risk of bias within a study |
|         |                            |                                                    |                                                         | 研究参加者と治療提供者<br>participants and personnel             | アウトカム評価者<br>outcome assessors                                                                                                          |                                         |                                              |                                                                                                                                                                  |                                              |
| 1       | Fernandez 2008             | Low risk                                           | Low risk                                                | Unclear risk                                          | Low risk                                                                                                                               | Low risk                                | Unclear risk                                 | High risk                                                                                                                                                        | Unclear risk                                 |
| 2       | Guerin 2004                | Low risk                                           | Low risk                                                | High risk                                             | Low risk                                                                                                                               | Low risk                                | Unclear risk                                 | High risk                                                                                                                                                        | Unclear risk                                 |
| 3       | Guerin 2013                | Low risk                                           | Low risk                                                | High risk                                             | Low risk                                                                                                                               | Low risk                                | Low risk                                     | Low risk                                                                                                                                                         | Low risk                                     |
| 4       | Mancebo 2006               | Low risk                                           | Low risk                                                | Unclear risk                                          | Low risk                                                                                                                               | Low risk                                | Unclear risk                                 | High risk                                                                                                                                                        | Unclear risk                                 |
| 5       | Taccone 2009               | Low risk                                           | Low risk                                                | Unclear risk                                          | Low risk                                                                                                                               | Low risk                                | Low risk                                     | High risk                                                                                                                                                        | Low risk                                     |
| 6       | Voggenreiter 2005          | Low risk                                           | Low risk                                                | Unclear risk                                          | Low risk                                                                                                                               | Low risk                                | Unclear risk                                 | Low risk                                                                                                                                                         | Low risk                                     |
|         |                            |                                                    |                                                         |                                                       |                                                                                                                                        |                                         |                                              |                                                                                                                                                                  |                                              |
| 番号      | 著者名 発表年<br>(Forest plot表示) | risk of biasコメント                                   |                                                         |                                                       |                                                                                                                                        |                                         |                                              |                                                                                                                                                                  |                                              |
| 1       | Fernandez 2008             | computer-generated random sequence                 | a centralized call center                               | 記載なし                                                  | 記載ないが影響なし                                                                                                                              | Intention to treat analysisで、欠損数<10%    | Pre-registration dataなし                      | 必要サンプルサイズは250であったが、初年度に42人しか参加がなく、早期中止 crossover許容                                                                                                               | 早期中止やcrossoverの影響が不明                         |
| 2       | Guerin 2004                | computer-generated                                 | sequentially numbered, opaque, and sealed envelopes     | data collectors were not blinded                      | outcomes assessors were not blinded, ただし影響なし                                                                                           | Intention to treat analysisで、欠損数<10%    | Pre-registration dataなし                      | crossover許容                                                                                                                                                      | crossoverの影響不明                               |
| 3       | Guerin 2013                | computer-generated                                 | centralized Web-based management system                 | data collectors were aware of study group assignments | outcomes assessors were not aware of study group assignments                                                                           | Intention to treat analysisで、欠損数<10%    | Pre-registration dataの通り                     | 特記事項なし(COIあり) crossoverなし                                                                                                                                        | 治療者のblindingはないが影響は小さい                       |
| 4       | Mancebo 2006               | computer-generated                                 | concealment was performed using sealed opaque envelopes | 記載なし                                                  | 記載ないが影響なし                                                                                                                              | Intention to treat analysisで、欠損数<10%    | Pre-registration dataなし                      | 必要サンプルサイズは200であったが、登録数の減少により、早期中止 crossover許容<br>著者の一人はRotaprone Bed製造業者(KCI)のコンサルタントで報酬を得ているが、この研究にRotaprone Bedは使用されておらず、製造業者の関与なし                             | 早期中止や利益相反の研究への影響は不明                          |
| 5       | Taccone 2009               | computer-generated with a permuted-block algorithm | a centralized telephone randomization system            | 記載なし                                                  | outcome data were available during the study only to the members of the data and safety monitoring board for interim analysis, ただし影響なし | Intention to treat analysisで、欠損数<10%    | Pre-registration dataの通り                     | crossover許容<br>Rotaprone rotational bedの製造業者(KCI)により同ベッドが無料で提供され、本研究の20施設で使用された。KCIは研究のコーディネートセンターや研究者の定例会議の秘書業務を担当したが、研究自体への関与なし<br>著者の一人はKCI本部諮問会議委員として報酬を得ている | crossoverや利益相反の研究への影響は不明                     |
| 6       | Voggenreiter 2005          | permuted-block algorithm                           | centrally by telephone                                  | 記載なし                                                  | 記載ないが影響なし                                                                                                                              | Intention to treat analysisで、欠損数<10%    | Pre-registration dataなし                      | 特記事項なし                                                                                                                                                           | unclearな要素もあるが、全体的にriskは低い                   |

| Outcome |                            | Tracheal tube trouble                              |                                                         | risk of bias                                          |                                                                                                                                       | serious (-1)                            |                                              |                                                                                                                                                               |                                                  |
|---------|----------------------------|----------------------------------------------------|---------------------------------------------------------|-------------------------------------------------------|---------------------------------------------------------------------------------------------------------------------------------------|-----------------------------------------|----------------------------------------------|---------------------------------------------------------------------------------------------------------------------------------------------------------------|--------------------------------------------------|
| 番号      | 著者名 発表年<br>(Forest plot表示) | risk of bias評価                                     |                                                         |                                                       |                                                                                                                                       |                                         |                                              |                                                                                                                                                               |                                                  |
|         |                            | ランダム割付順序の生成<br>random sequence generation          | 割り付けの隠蔽化<br>allocation concealment                      | ブラインド<br>blinding                                     |                                                                                                                                       | 不完全なアウトカムデータ<br>incomplete outcome data | 選択されたアウトカムの報告<br>selective outcome reporting | その他のバイアス<br>Other sources of bias                                                                                                                             | 研究内でのバイアスのリスク<br>Risk of bias within a study     |
|         |                            |                                                    |                                                         | 研究参加者と治療提供者<br>participants and personnel             | アウトカム評価者<br>outcome assessors                                                                                                         |                                         |                                              |                                                                                                                                                               |                                                  |
| 1       | Fernandez 2008             | Low risk                                           | Low risk                                                | Unclear risk                                          | Low risk                                                                                                                              | Low risk                                | Unclear risk                                 | High risk                                                                                                                                                     | Unclear risk                                     |
| 2       | Gattinoni 2001             | Low risk                                           | Low risk                                                | Unclear risk                                          | Low risk                                                                                                                              | Low risk                                | Unclear risk                                 | High risk                                                                                                                                                     | Low risk                                         |
| 3       | Guerin 2013                | Low risk                                           | Low risk                                                | High risk                                             | Low risk                                                                                                                              | Low risk                                | High risk                                    | Low risk                                                                                                                                                      | Unclear risk                                     |
| 4       | Mancebo 2006               | Low risk                                           | Low risk                                                | Unclear risk                                          | Low risk                                                                                                                              | Low risk                                | Unclear risk                                 | High risk                                                                                                                                                     | Unclear risk                                     |
| 5       | Taccone 2009               | Low risk                                           | Low risk                                                | Unclear risk                                          | Low risk                                                                                                                              | Low risk                                | High risk                                    | High risk                                                                                                                                                     | High risk                                        |
| 6       | Voggenreiter 2005          | Low risk                                           | Low risk                                                | Unclear risk                                          | Low risk                                                                                                                              | Low risk                                | Unclear risk                                 | Low risk                                                                                                                                                      | Low risk                                         |
|         |                            |                                                    |                                                         |                                                       |                                                                                                                                       |                                         |                                              |                                                                                                                                                               |                                                  |
| 番号      | 著者名 発表年<br>(Forest plot表示) | risk of biasコメント                                   |                                                         |                                                       |                                                                                                                                       |                                         |                                              |                                                                                                                                                               |                                                  |
| 1       | Fernandez 2008             | computer-generated random sequence                 | a centralized call center                               | 記載なし                                                  | 記載ないが影響なし                                                                                                                             | Intention to treat analysisで、欠損数<10%    | Pre-registration dataなし                      | 必要サンプルサイズは250であったが、初年度に42人しか参加がなく、早期中止crossover許容                                                                                                             | 早期中止やcrossoverの影響が不明                             |
| 2       | Gattinoni 2001             | permuted-block algorithm                           | centrally by telephone                                  | 記載なし                                                  | 記載ないが影響なし                                                                                                                             | Intention to treat analysisで、欠損数<10%    | Pre-registration dataなし                      | 先行1年で次第に参加者が減り、必要サンプルサイズは死亡者95人であったが、70人の時点で早期中止                                                                                                              | 早期中止されたものの、8割弱リクルートできており、結果の解釈への影響は大きくはない        |
| 3       | Guerin 2013                | computer-generated                                 | centralized Web-based management system                 | data collectors were aware of study group assignments | outcomes assessors were not aware of study group assignments                                                                          | Intention to treat analysisで、欠損数<10%    | Pre-registration dataに合併症の記載なし               | 特記事項なし(OOIあり)crossoverなし                                                                                                                                      | 事前計画になかったアウトカムであり、結果の解釈への影響不明                    |
| 4       | Mancebo 2006               | computer-generated                                 | concealment was performed using sealed opaque envelopes | 記載なし                                                  | 記載ないが影響なし                                                                                                                             | Intention to treat analysisで、欠損数<10%    | Pre-registration dataなし                      | 必要サンプルサイズは200であったが、登録数の減少により、早期中止crossover許容<br>著者の一人はRotaprone Bed製造業者(KCI)のコンサルタントで報酬を得ているが、この研究にRotaprone Bedは使用されておらず、製造業者の関与なし                           | 早期中止や利益相反の研究への影響は不明                              |
| 5       | Taccone 2009               | computer-generated with a permuted-block algorithm | a centralized telephone randomization system            | 記載なし                                                  | outcome data were available during the study only to the members of the data and safety monitoring board for interim analysis、ただし影響なし | Intention to treat analysisで、欠損数<10%    | Pre-registration dataに合併症の記載なし               | crossover許容<br>Rotoprone rotational bedの製造業者(KCI)により同ベッドが無料で提供され、本研究の20施設で使用された。KCIは研究のコーディネーターや研究者の定例会議の秘書業務を担当したが、研究自体への関与なし<br>著者の一人はKCI本部諮問会議委員として報酬を得ている | 事前計画になかったアウトカムであり、crossoverや利益相反もあり、biasのriskは高い |
| 6       | Voggenreiter 2005          | permuted-block algorithm                           | centrally by telephone                                  | 記載なし                                                  | 記載ないが影響なし                                                                                                                             | Intention to treat analysisで、欠損数<10%    | Pre-registration dataなし                      | 特記事項なし                                                                                                                                                        | unclearな要素もあるが、全体的にriskは低い                       |

| Outcome                                   |                               | Pressure ulcer                            |                                    | risk of bias      |               | not serious (0)                         |                                              |                                                  |                                              |
|-------------------------------------------|-------------------------------|-------------------------------------------|------------------------------------|-------------------|---------------|-----------------------------------------|----------------------------------------------|--------------------------------------------------|----------------------------------------------|
| 番号                                        | 著者名 発表年<br>(Forest plot表示)    | risk of bias評価                            |                                    |                   |               |                                         |                                              |                                                  |                                              |
|                                           |                               | ランダム割付順序の生成<br>random sequence generation | 割り付けの隠蔽化<br>allocation concealment | ブラインド<br>blinding |               | 不完全なアウトカムデータ<br>incomplete outcome data | 選択されたアウトカムの報告<br>selective outcome reporting | その他のバイアス<br>Other sources of bias                | 研究内でのバイアスのリスク<br>Risk of bias within a study |
| 研究参加者と治療提供者<br>participants and personnel | アウトカム評価者<br>outcome assessors |                                           |                                    |                   |               |                                         |                                              |                                                  |                                              |
| 1                                         | Gattinoni 2001                | Low risk                                  | Low risk                           | Unclear risk      | Low risk      | Low risk                                | Unclear risk                                 | High risk                                        | Low risk                                     |
| 2                                         | Voggenreiter 2005             | Low risk                                  | Low risk                           | Unclear risk      | Low risk      | Low risk                                | Unclear risk                                 | Low risk                                         | Low risk                                     |
|                                           |                               |                                           |                                    |                   |               |                                         |                                              |                                                  |                                              |
| 番号                                        | 著者名 発表年<br>(Forest plot表示)    | risk of biasコメント                          |                                    |                   |               |                                         |                                              |                                                  |                                              |
| 1                                         | Gattinoni 2001                | permuted-block algorithm                  | centrally by telephone             | 記載なし              | 記載ないが定義あり影響なし | Intention to treat analysisで、欠損数<10%    | Pre-registration dataなし                      | 先行1年で次第に参加者が減り、必要サンプルサイズは死亡者95人であったが、70人の時点で早期中止 | 早期中止されたものの、8割弱リクルートできており、結果の解釈への影響は大きくはない    |
| 2                                         | Voggenreiter 2005             | permuted-block algorithm                  | centrally by telephone             | 記載なし              | 記載ないが影響なし     | Intention to treat analysisで、欠損数<10%    | Pre-registration dataなし                      | 特記事項なし                                           | unclearな要素もあるが、全体的にriskは低い                   |

## Short term mortality

|                   | Random sequence generation (selection bias) | Allocation concealment (selection bias) | Blinding of participants and personnel (performance bias) | Blinding of outcome assessment (detection bias) | Incomplete outcome data (attrition bias) | Selective reporting (reporting bias) | Other bias |
|-------------------|---------------------------------------------|-----------------------------------------|-----------------------------------------------------------|-------------------------------------------------|------------------------------------------|--------------------------------------|------------|
| Beuret 2002       | ?                                           | ?                                       | ?                                                         | +                                               | +                                        | ?                                    | -          |
| Fernandez 2008    | +                                           | +                                       | ?                                                         | +                                               | +                                        | ?                                    | -          |
| Gattinoni 2001    | +                                           | +                                       | ?                                                         | +                                               | +                                        | ?                                    | -          |
| Guerin 2004       | +                                           | +                                       | -                                                         | +                                               | +                                        | ?                                    | -          |
| Guerin 2013       | +                                           | +                                       | -                                                         | +                                               | +                                        | +                                    | +          |
| Mancebo 2006      | +                                           | +                                       | ?                                                         | +                                               | +                                        | ?                                    | -          |
| Taccone 2009      | +                                           | +                                       | ?                                                         | +                                               | +                                        | +                                    | -          |
| Voggenreiter 2005 | +                                           | +                                       | ?                                                         | +                                               | +                                        | ?                                    | +          |

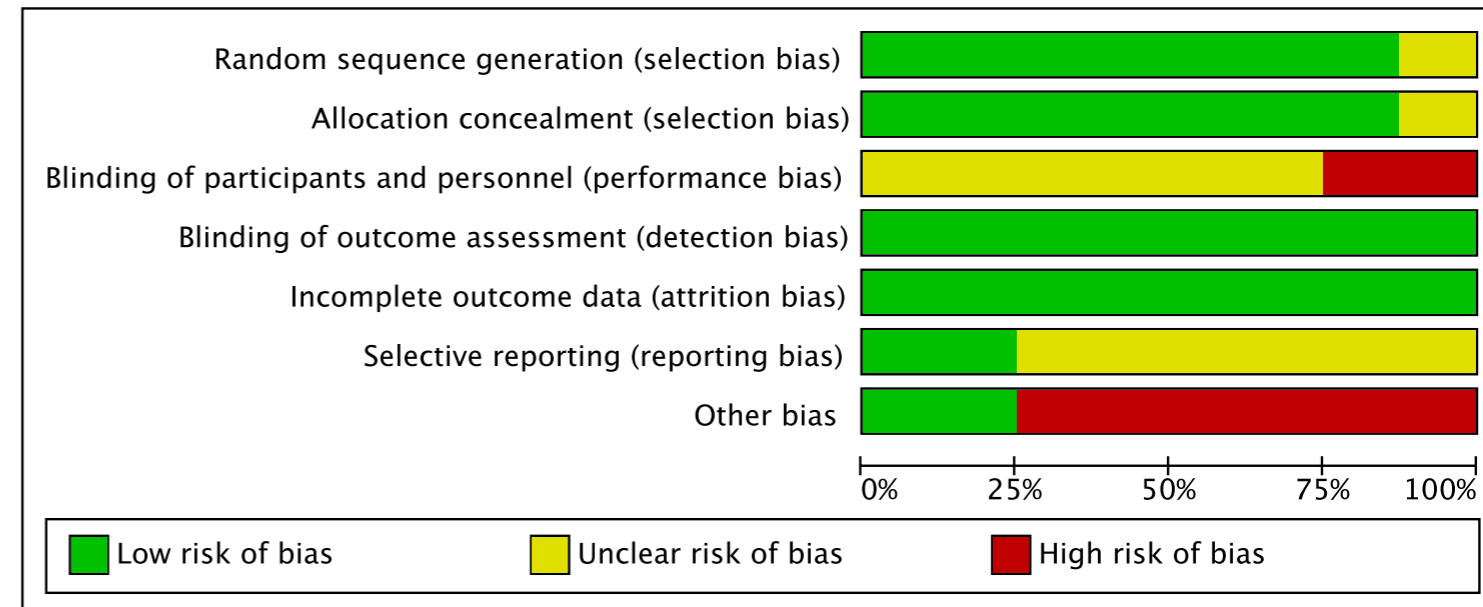

## Complications on tracheal tube (accidental extubation, dislocation of tube)

|                   | Random sequence generation (selection bias) | Allocation concealment (selection bias) | Blinding of participants and personnel (performance bias) | Blinding of outcome assessment (detection bias) | Incomplete outcome data (attrition bias) | Selective reporting (reporting bias) | Other bias |
|-------------------|---------------------------------------------|-----------------------------------------|-----------------------------------------------------------|-------------------------------------------------|------------------------------------------|--------------------------------------|------------|
| Fernandez 2008    | +                                           | +                                       | ?                                                         | +                                               | +                                        | ?                                    | -          |
| Gattinoni 2001    | +                                           | +                                       | ?                                                         | +                                               | +                                        | ?                                    | -          |
| Guerin 2013       | +                                           | +                                       | -                                                         | +                                               | +                                        | -                                    | +          |
| Mancebo 2006      | +                                           | +                                       | ?                                                         | +                                               | +                                        | ?                                    | -          |
| Taccone 2009      | +                                           | +                                       | ?                                                         | +                                               | +                                        | -                                    | -          |
| Voggenreiter 2005 | +                                           | +                                       | ?                                                         | +                                               | +                                        | ?                                    | +          |

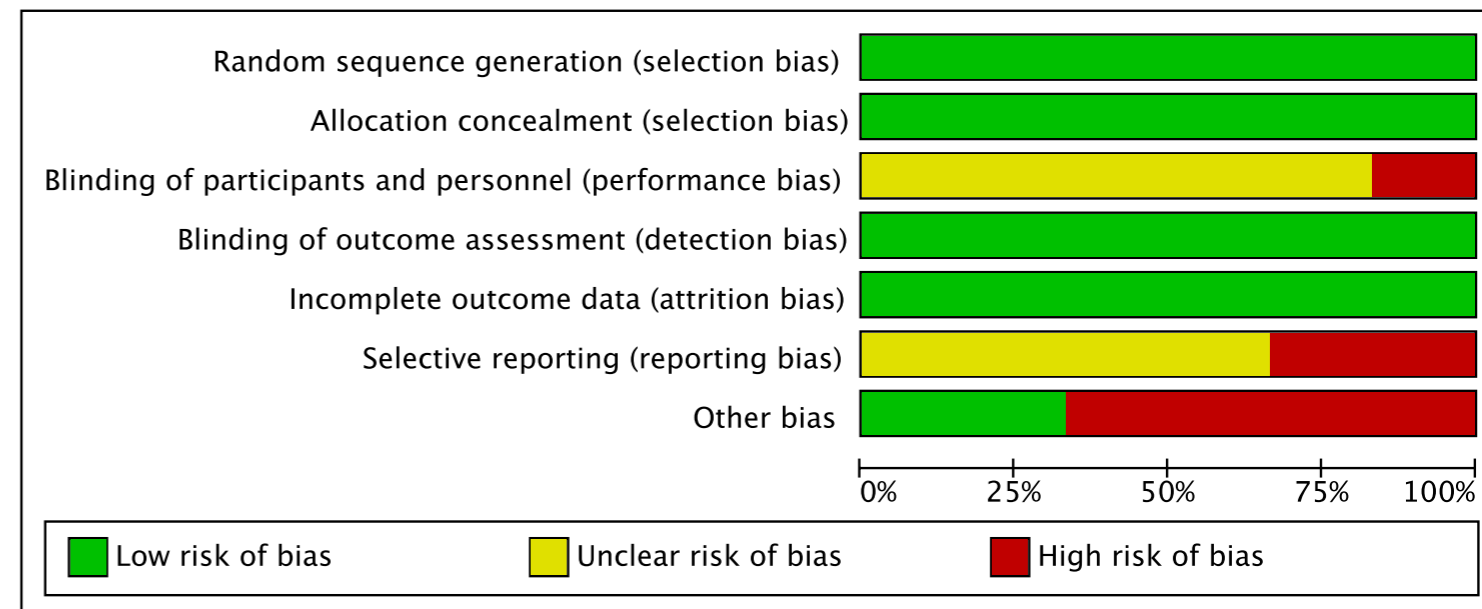

## Decubitus

|                   | Random sequence generation (selection bias) | Allocation concealment (selection bias) | Blinding of participants and personnel (performance bias) | Blinding of outcome assessment (detection bias) | Incomplete outcome data (attrition bias) | Selective reporting (reporting bias) | Other bias |
|-------------------|---------------------------------------------|-----------------------------------------|-----------------------------------------------------------|-------------------------------------------------|------------------------------------------|--------------------------------------|------------|
| Gattinoni 2001    | +                                           | +                                       | ?                                                         | +                                               | +                                        | ?                                    | -          |
| Voggenreiter 2005 | +                                           | +                                       | ?                                                         | +                                               | +                                        | ?                                    | +          |

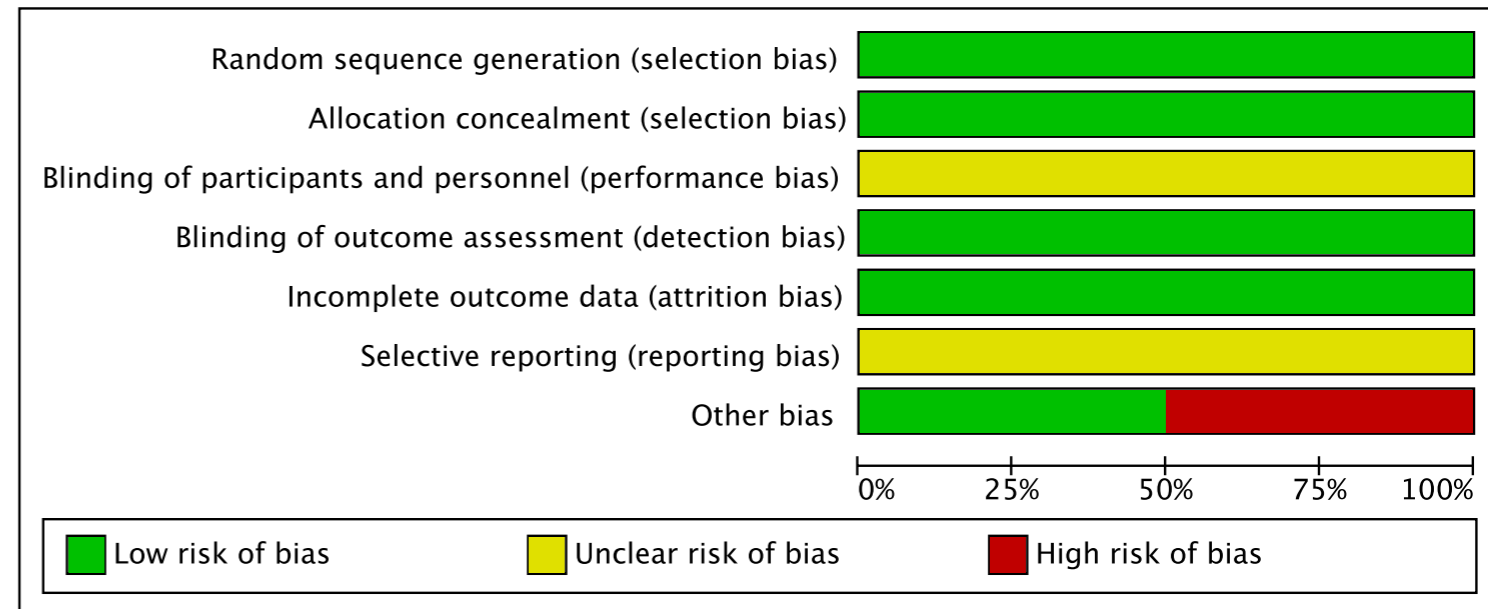

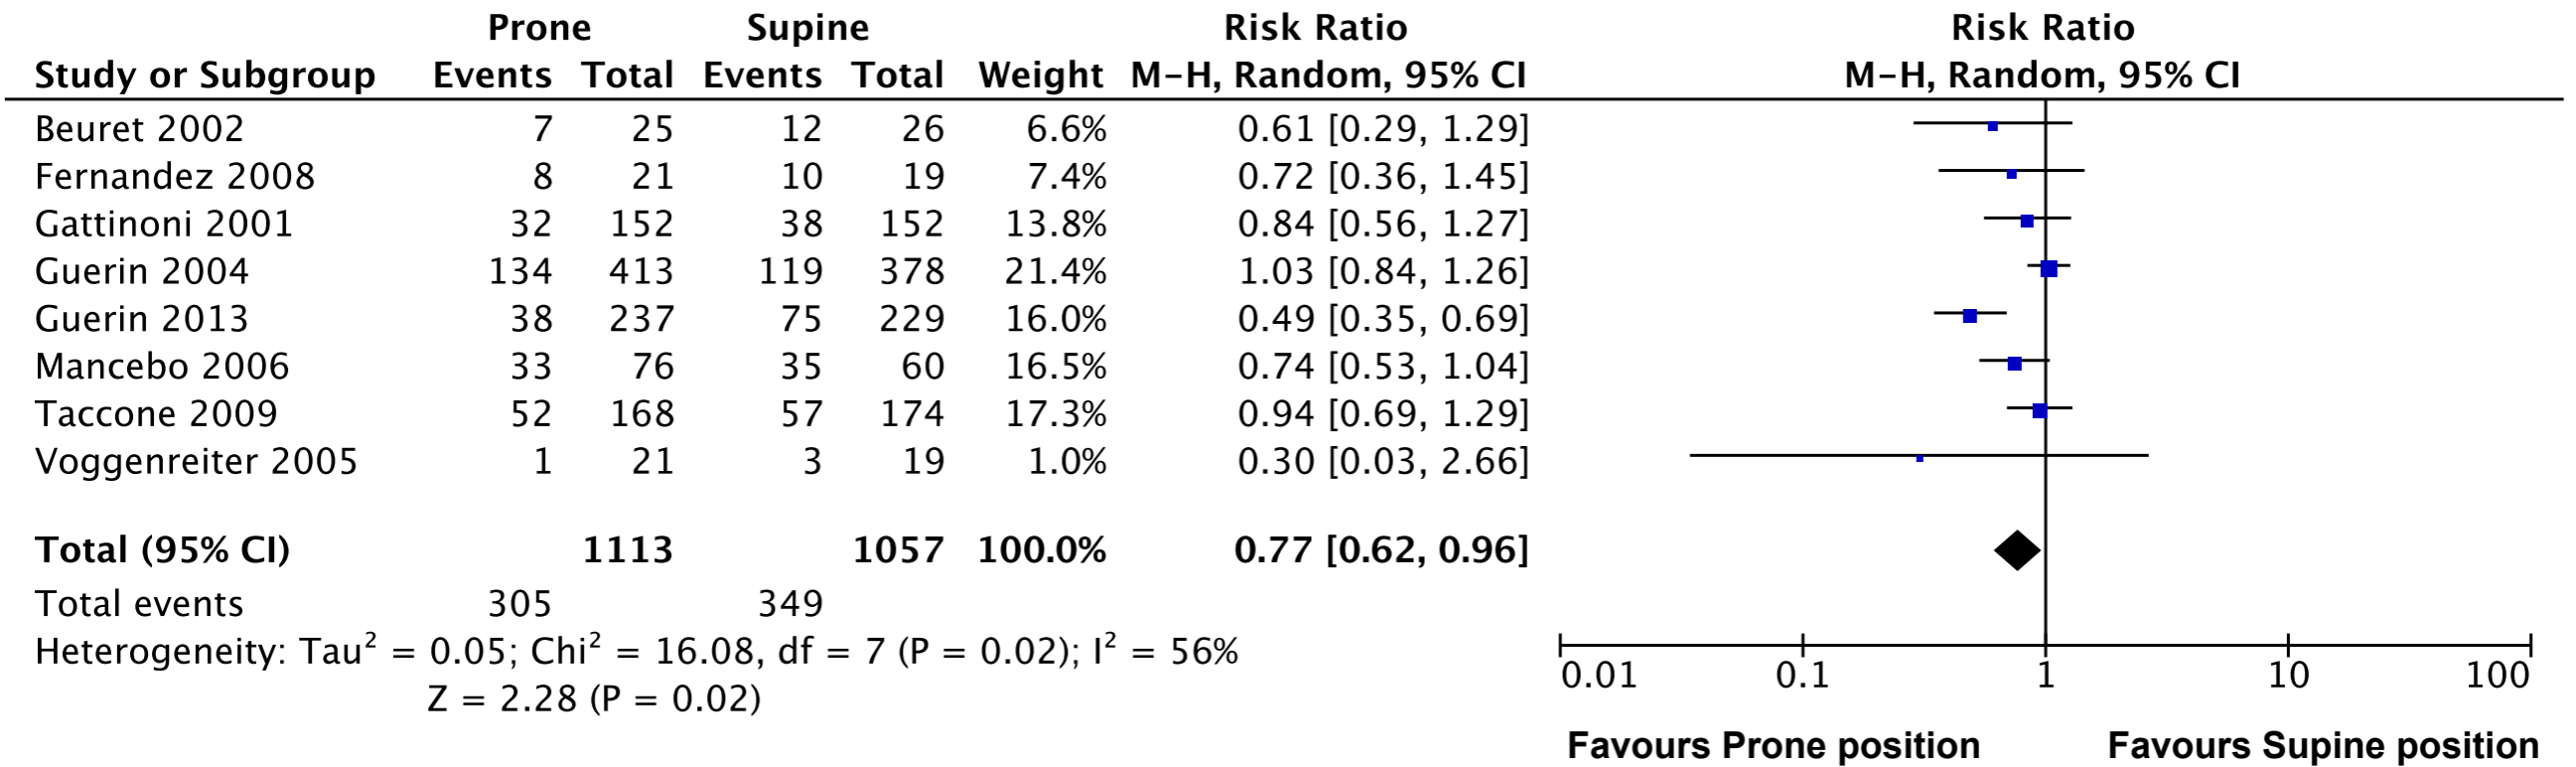

Complications on tracheal tube (accidental extubation, dislocation of tube)

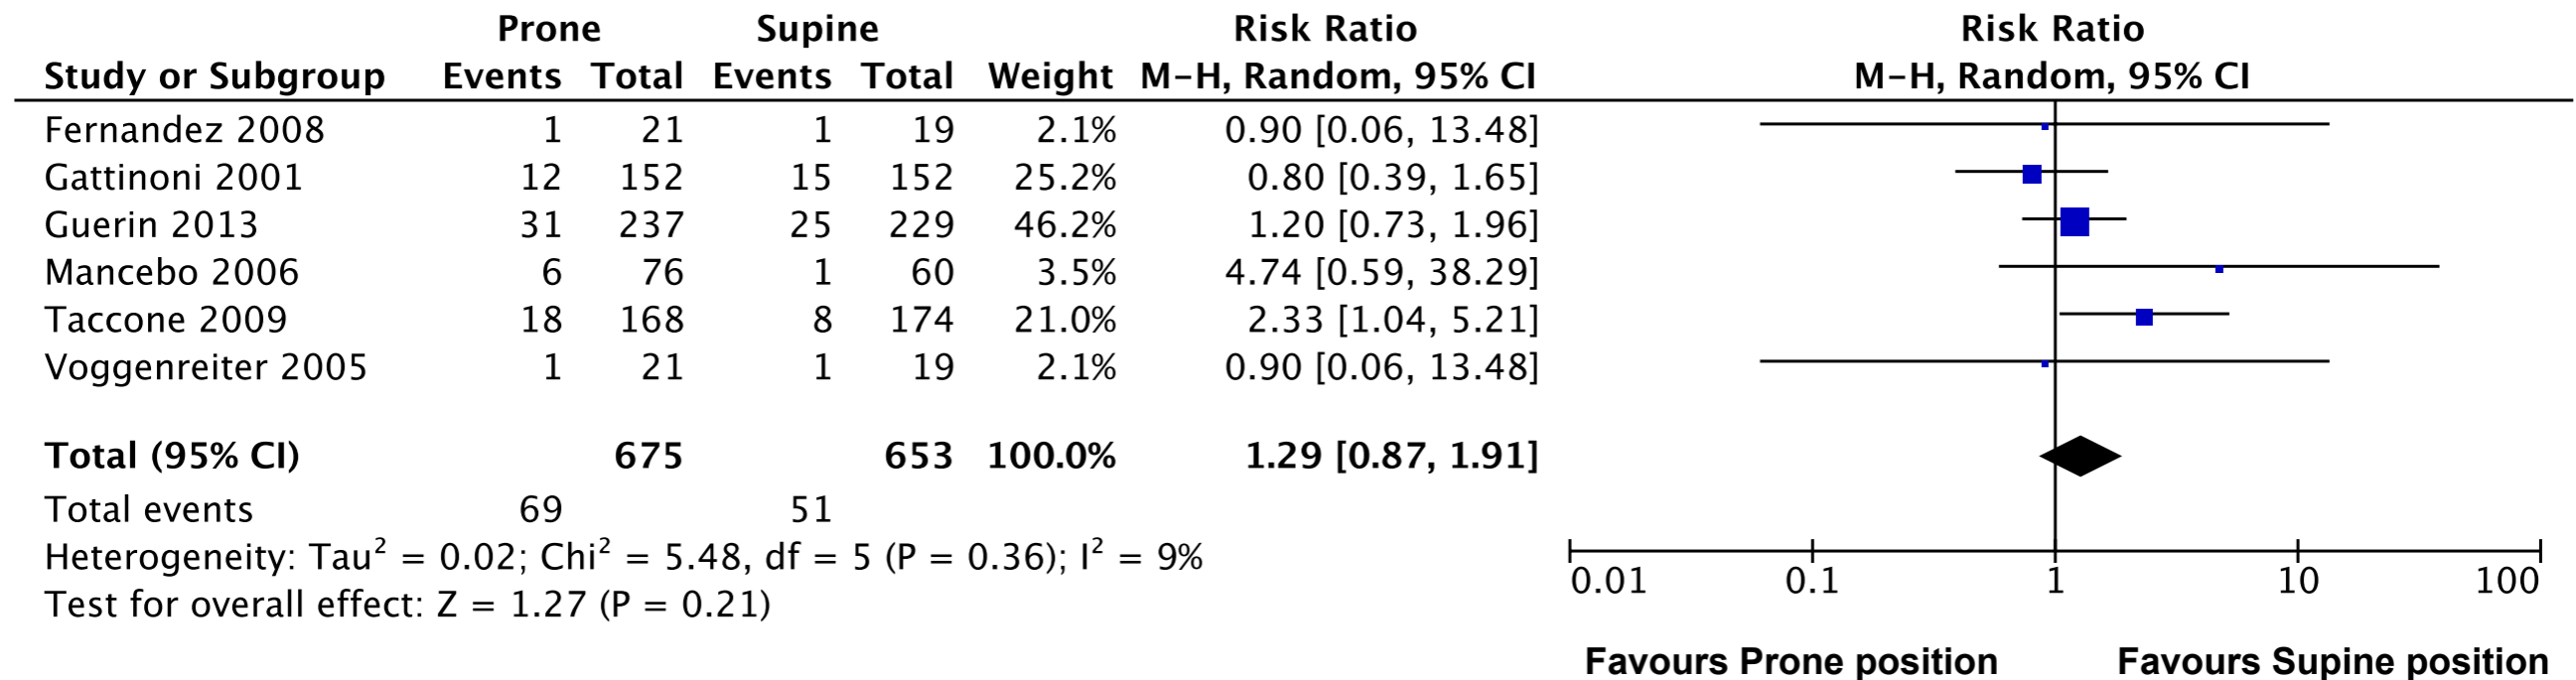



### Decubitus

| Study or Subgroup                                                                                       | Prone  |            | Supine |            | Weight        | Risk Ratio               |
|---------------------------------------------------------------------------------------------------------|--------|------------|--------|------------|---------------|--------------------------|
|                                                                                                         | Events | Total      | Events | Total      |               | M-H, Random, 95% CI      |
| Gattinoni 2001                                                                                          | 55     | 152        | 42     | 152        | 55.3%         | 1.31 [0.94, 1.83]        |
| Voggenreiter 2005                                                                                       | 19     | 21         | 12     | 19         | 44.7%         | 1.43 [0.99, 2.07]        |
| <b>Total (95% CI)</b>                                                                                   |        | <b>173</b> |        | <b>171</b> | <b>100.0%</b> | <b>1.36 [1.06, 1.75]</b> |
| Total events                                                                                            | 74     |            | 54     |            |               |                          |
| Heterogeneity: Tau <sup>2</sup> = 0.00; Chi <sup>2</sup> = 0.15, df = 1 (P = 0.70); I <sup>2</sup> = 0% |        |            |        |            |               |                          |
| Test for overall effect: Z = 2.45 (P = 0.01)                                                            |        |            |        |            |               |                          |

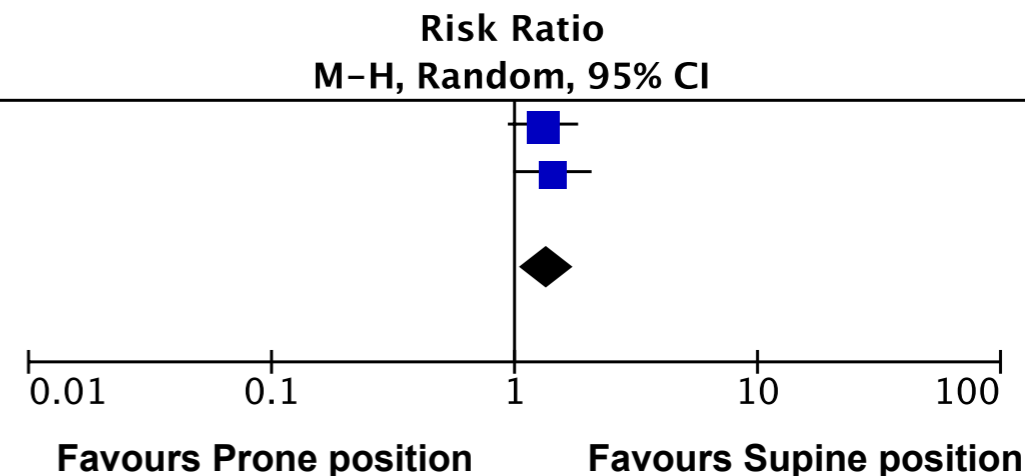

### subgroup analysis, Short term mortality (moderate to severe ARDS)

| Study or Subgroup                                                                                        | Prone  |            | Supine |            | Weight        | Risk Ratio               |
|----------------------------------------------------------------------------------------------------------|--------|------------|--------|------------|---------------|--------------------------|
|                                                                                                          | Events | Total      | Events | Total      |               | M-H, Random, 95% CI      |
| Fernandez 2008                                                                                           | 8      | 21         | 10     | 19         | 13.8%         | 0.72 [0.36, 1.45]        |
| Guerin 2013                                                                                              | 38     | 237        | 75     | 229        | 27.9%         | 0.49 [0.35, 0.69]        |
| Mancebo 2006                                                                                             | 33     | 76         | 35     | 60         | 28.5%         | 0.74 [0.53, 1.04]        |
| Taccone 2009                                                                                             | 52     | 168        | 57     | 174        | 29.8%         | 0.94 [0.69, 1.29]        |
| <b>Total (95% CI)</b>                                                                                    |        | <b>502</b> |        | <b>482</b> | <b>100.0%</b> | <b>0.71 [0.52, 0.97]</b> |
| Total events                                                                                             | 131    |            | 177    |            |               |                          |
| Heterogeneity: Tau <sup>2</sup> = 0.06; Chi <sup>2</sup> = 7.86, df = 3 (P = 0.05); I <sup>2</sup> = 62% |        |            |        |            |               |                          |
| Test for overall effect: Z = 2.16 (P = 0.03)                                                             |        |            |        |            |               |                          |

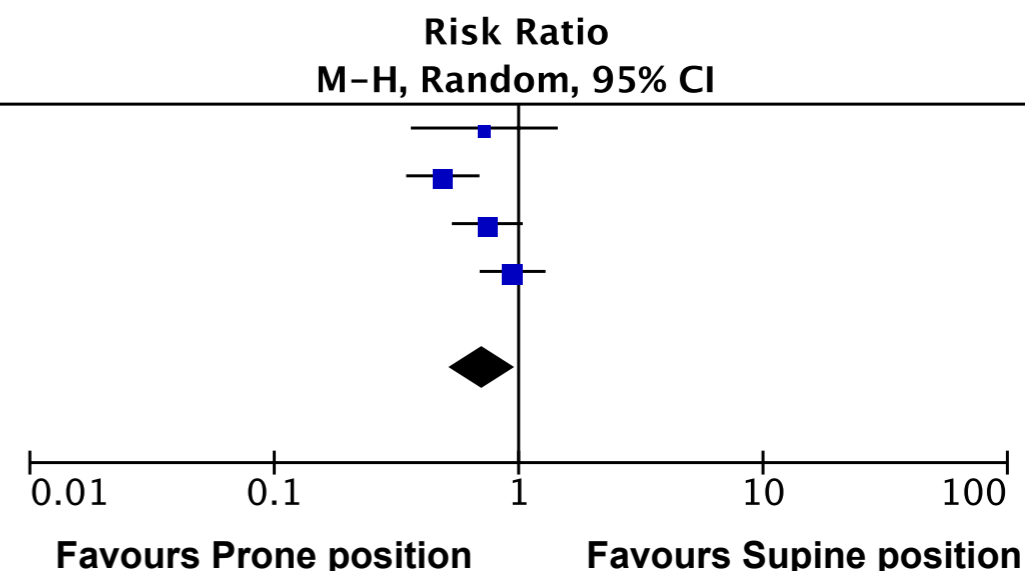

### subgroup analysis, Short term mortality (prone position with long duration)

| Study or Subgroup                                                                                          | Prone  |            | Supine |            | Weight        | Risk Ratio               |
|------------------------------------------------------------------------------------------------------------|--------|------------|--------|------------|---------------|--------------------------|
|                                                                                                            | Events | Total      | Events | Total      |               | M-H, Random, 95% CI      |
| Fernandez 2008                                                                                             | 8      | 21         | 10     | 19         | 10.5%         | 0.72 [0.36, 1.45]        |
| Guerin 2004                                                                                                | 134    | 413        | 119    | 378        | 25.4%         | 1.03 [0.84, 1.26]        |
| Guerin 2013                                                                                                | 38     | 237        | 75     | 229        | 20.3%         | 0.49 [0.35, 0.69]        |
| Mancebo 2006                                                                                               | 33     | 76         | 35     | 60         | 20.7%         | 0.74 [0.53, 1.04]        |
| Taccone 2009                                                                                               | 52     | 168        | 57     | 174        | 21.6%         | 0.94 [0.69, 1.29]        |
| Voggenreiter 2005                                                                                          | 1      | 21         | 3      | 19         | 1.6%          | 0.30 [0.03, 2.66]        |
| <b>Total (95% CI)</b>                                                                                      |        | <b>936</b> |        | <b>879</b> | <b>100.0%</b> | <b>0.77 [0.58, 1.02]</b> |
| Total events                                                                                               | 266    |            | 299    |            |               |                          |
| Heterogeneity: Tau <sup>2</sup> = 0.07; Chi <sup>2</sup> = 15.39, df = 5 (P = 0.009); I <sup>2</sup> = 68% |        |            |        |            |               |                          |
| Test for overall effect: Z = 1.84 (P = 0.07)                                                               |        |            |        |            |               |                          |

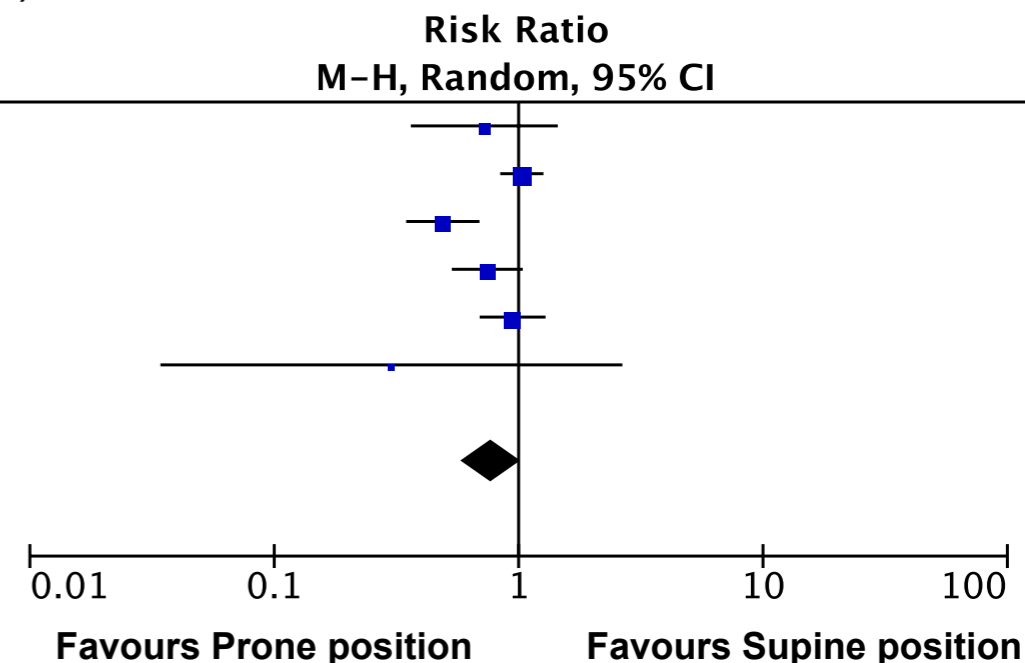

## Summary of findings:

## Prone positioning compared to supine positioning for adult ARDS

Patient or population: adult ARDS

Intervention: prone positioning

Comparison: supine positioning

| Outcomes                                                 | Anticipated absolute effects* (95% CI) |                                  | Relative effect (95% CI)  | № of participants (studies) | Quality of the evidence (GRADE) | Comments |                           |                  |                            |  |
|----------------------------------------------------------|----------------------------------------|----------------------------------|---------------------------|-----------------------------|---------------------------------|----------|---------------------------|------------------|----------------------------|--|
|                                                          | Risk with supine positioning           | Risk with prone positioning      |                           |                             |                                 |          |                           |                  |                            |  |
| Short-term mortality                                     | Study population                       |                                  | RR 0.77<br>(0.62 to 0.96) | 2170<br>(8 RCTs)            | ⊕⊕⊕○<br>MODERATE <sup>1</sup>   |          |                           |                  |                            |  |
|                                                          | 330 / 1000                             | <b>254 / 1000</b><br>(205 ~ 317) |                           |                             |                                 |          |                           |                  |                            |  |
|                                                          | Low                                    |                                  |                           |                             |                                 |          |                           |                  |                            |  |
|                                                          | 250 / 1000                             | <b>193 / 1000</b><br>(155 ~ 240) |                           |                             |                                 |          |                           |                  |                            |  |
|                                                          | High                                   |                                  |                           |                             |                                 |          |                           |                  |                            |  |
|                                                          | 526 / 1000                             | <b>405 / 1000</b><br>(326 ~ 505) |                           |                             |                                 |          |                           |                  |                            |  |
|                                                          | Study population                       |                                  |                           |                             |                                 |          | RR 0.71<br>(0.52 to 0.97) | 984<br>(4 RCTs)  | ⊕⊕⊕○<br>LOW <sup>2,3</sup> |  |
|                                                          | 367 / 1000                             | <b>261 / 1000</b><br>(191 ~ 356) |                           |                             |                                 |          |                           |                  |                            |  |
| Low                                                      |                                        |                                  |                           |                             |                                 |          |                           |                  |                            |  |
| 328 / 1000                                               | <b>233 / 1000</b><br>(171 ~ 318)       |                                  |                           |                             |                                 |          |                           |                  |                            |  |
|                                                          | High                                   |                                  |                           |                             |                                 |          |                           |                  |                            |  |
|                                                          | 526 / 1000                             | <b>373 / 1000</b><br>(274 ~ 510) |                           |                             |                                 |          |                           |                  |                            |  |
|                                                          | Study population                       |                                  |                           |                             |                                 |          | RR 0.77<br>(0.58 to 1.02) | 1815<br>(6 RCTs) | ⊕⊕⊕○<br>LOW <sup>4,5</sup> |  |
|                                                          | 340 / 1000                             | <b>262 / 1000</b><br>(197 ~ 347) |                           |                             |                                 |          |                           |                  |                            |  |
| Low                                                      |                                        |                                  |                           |                             |                                 |          |                           |                  |                            |  |
| 315 / 1000                                               | <b>243 / 1000</b><br>(183 ~ 321)       |                                  |                           |                             |                                 |          |                           |                  |                            |  |
|                                                          | High                                   |                                  |                           |                             |                                 |          |                           |                  |                            |  |
|                                                          | 526 / 1000                             | <b>405 / 1000</b><br>(305 ~ 537) |                           |                             |                                 |          |                           |                  |                            |  |
|                                                          | Study population                       |                                  |                           |                             |                                 |          | RR 1.29<br>(0.87 to 1.91) | 1328<br>(6 RCTs) | ⊕⊕⊕○<br>LOW <sup>6,7</sup> |  |
|                                                          | 78 / 1000                              | <b>101 / 1000</b><br>(68 ~ 149)  |                           |                             |                                 |          |                           |                  |                            |  |
| Low                                                      |                                        |                                  |                           |                             |                                 |          |                           |                  |                            |  |
| 46 / 1000                                                | <b>59 / 1000</b><br>(40 ~ 88)          |                                  |                           |                             |                                 |          |                           |                  |                            |  |
| Tracheal tube trouble (unplanned extubation/dislocation) | High                                   |                                  |                           |                             |                                 |          |                           |                  |                            |  |
|                                                          | 99 / 1000                              | <b>128 / 1000</b><br>(86 ~ 189)  |                           |                             |                                 |          |                           |                  |                            |  |

|                |                         |                                   |                                  |                 |                               |
|----------------|-------------------------|-----------------------------------|----------------------------------|-----------------|-------------------------------|
| Pressure ulcer | <b>Study population</b> |                                   | <b>RR 1.36</b><br>(1.06 to 1.75) | 344<br>(2 RCTs) | ⊕⊕⊕○<br>MODERATE <sup>3</sup> |
|                | 316 / 1000              | <b>429 / 1000</b><br>(335 ~ 553)  |                                  |                 |                               |
|                | <b>Low</b>              |                                   |                                  |                 |                               |
|                | 276 / 1000              | <b>375 / 1000</b><br>(293 ~ 483)  |                                  |                 |                               |
|                | <b>High</b>             |                                   |                                  |                 |                               |
|                | 632 / 1000              | <b>860 / 1000</b><br>(670 ~ 1000) |                                  |                 |                               |

\*The risk in the intervention group (and its 95% confidence interval) is based on the assumed risk in the comparison group and the relative effect of the intervention (and its 95% CI).

CI: Confidence interval; RR: Risk ratio;

#### GRADE Working Group grades of evidence

**High quality:** We are very confident that the true effect lies close to that of the estimate of the effect

**Moderate quality:** We are moderately confident in the effect estimate: The true effect is likely to be close to the estimate of the effect, but there is a possibility that it is substantially different

**Low quality:** Our confidence in the effect estimate is limited: The true effect may be substantially different from the estimate of the effect

**Very low quality:** We have very little confidence in the effect estimate: The true effect is likely to be substantially different from the estimate of effect

1. There is moderate heterogeneity with I<sup>2</sup>=56%.
2. There is substantial heterogeneity with I<sup>2</sup>=62%.
3. Sample size is small.
4. There is substantial heterogeneity with I<sup>2</sup>=68%.
5. Sample size is small and 95%CI crosses clinical decision threshold.
6. This outcome was not prearranged measurement item in two RCTs that have large weights.
7. Sample size is small and 95%CI is wide and crosses clinical decision threshold.

**Table 1G. Evidence profile**  
**CQ7 : Prone positioning compared with supine positioning for adult patients with ARDS**

| Quality assessment                                       |                   |                      |                      |              |                      |                      | N <sup>o</sup> of patients |                  | Effect                           |                                                    | Quality                       | Importance |
|----------------------------------------------------------|-------------------|----------------------|----------------------|--------------|----------------------|----------------------|----------------------------|------------------|----------------------------------|----------------------------------------------------|-------------------------------|------------|
| N <sup>o</sup> of studies                                | Study design      | Risk of bias         | Inconsistency        | Indirectness | Imprecision          | Other considerations | Prone                      | Supine           | Relative (95% CI)                | Absolute (95% CI)                                  |                               |            |
| Short-term mortality                                     |                   |                      |                      |              |                      |                      |                            |                  |                                  |                                                    |                               |            |
| 8                                                        | Randomized trials | Not serious          | Serious <sup>1</sup> | Not serious  | Not serious          | None                 | 305/1113 (27.4%)           | 349/1057 (33.0%) | <b>RR 0.77</b><br>(0.62 to 0.96) | 76 fewer per 1000<br>(from 13 fewer to 125 fewer)  | ⊕⊕⊕○<br>MODERATE <sup>1</sup> | CRITICAL   |
|                                                          |                   |                      |                      |              |                      |                      |                            | 25.0%            |                                  | 57 fewer per 1000<br>(from 10 fewer to 95 fewer)   |                               |            |
|                                                          |                   |                      |                      |              |                      |                      |                            | 52.6%            |                                  | 121 fewer per 1000<br>(from 21 fewer to 200 fewer) |                               |            |
| Short-term mortality (moderate/severe)                   |                   |                      |                      |              |                      |                      |                            |                  |                                  |                                                    |                               |            |
| 4                                                        | Randomized trials | Not serious          | Serious <sup>2</sup> | Not serious  | Serious <sup>3</sup> | None                 | 131/502 (26.1%)            | 177/482 (36.7%)  | <b>RR 0.71</b><br>(0.52 to 0.97) | 106 fewer per 1000<br>(from 11 fewer to 176 fewer) | ⊕⊕○○<br>LOW <sup>2,3</sup>    | CRITICAL   |
|                                                          |                   |                      |                      |              |                      |                      |                            | 32.8%            |                                  | 95 fewer per 1000<br>(from 10 fewer to 157 fewer)  |                               |            |
|                                                          |                   |                      |                      |              |                      |                      |                            | 52.6%            |                                  | 153 fewer per 1000<br>(from 16 fewer to 252 fewer) |                               |            |
| Short-term mortality (prolonged prone)                   |                   |                      |                      |              |                      |                      |                            |                  |                                  |                                                    |                               |            |
| 6                                                        | Randomized trials | Not serious          | Serious <sup>4</sup> | Not serious  | Serious <sup>5</sup> | None                 | 266/936 (28.4%)            | 299/879 (34.0%)  | <b>RR 0.77</b><br>(0.58 to 1.02) | 78 fewer per 1000<br>(from 7 more to 143 fewer)    | ⊕⊕○○<br>LOW <sup>4,5</sup>    | CRITICAL   |
|                                                          |                   |                      |                      |              |                      |                      |                            | 31.5%            |                                  | 72 fewer per 1000<br>(from 6 more to 132 fewer)    |                               |            |
|                                                          |                   |                      |                      |              |                      |                      |                            | 52.6%            |                                  | 121 fewer per 1000<br>(from 11 more to 221 fewer)  |                               |            |
| Tracheal tube trouble (unplanned extubation/dislocation) |                   |                      |                      |              |                      |                      |                            |                  |                                  |                                                    |                               |            |
| 6                                                        | Randomized trials | Serious <sup>6</sup> | Not serious          | Not serious  | Serious <sup>7</sup> | None                 | 69/675 (10.2%)             | 51/653 (7.8%)    | <b>RR 1.29</b><br>(0.87 to 1.91) | 23 more per 1000<br>(from 10 fewer to 71 more)     | ⊕⊕○○<br>LOW <sup>6,7</sup>    | CRITICAL   |
|                                                          |                   |                      |                      |              |                      |                      |                            | 4.6%             |                                  | 13 more per 1000<br>(from 6 fewer to 42 more)      |                               |            |
|                                                          |                   |                      |                      |              |                      |                      |                            | 9.9%             |                                  | 29 more per 1000<br>(from 13 fewer to 90 more)     |                               |            |

CQ07 Evidence profile

| Pressure ulcer |                   |             |             |             |                      |      |                |                |                                  |                                                 |                                                                                                           |           |
|----------------|-------------------|-------------|-------------|-------------|----------------------|------|----------------|----------------|----------------------------------|-------------------------------------------------|-----------------------------------------------------------------------------------------------------------|-----------|
| 2              | Randomized trials | Not serious | Not serious | Not serious | Serious <sup>3</sup> | None | 74/173 (42.8%) | 54/171 (31.6%) | <b>RR 1.36</b><br>(1.06 to 1.75) | 114 more per 1000<br>(from 19 more to 237 more) |  MODERATE <sup>3</sup> | IMPORTANT |
|                |                   |             |             |             |                      |      |                | 27.6%          |                                  | 99 more per 1000<br>(from 17 more to 207 more)  |                                                                                                           |           |
|                |                   |             |             |             |                      |      |                | 63.2%          |                                  | 228 more per 1000<br>(from 38 more to 474 more) |                                                                                                           |           |

- 1 There is moderate heterogeneity with I2=56%.
- 2 There is substantial heterogeneity with I2=62%.
- 3 Sample size is small.
- 4 There is substantial heterogeneity with I2=68%.
- 5 Sample size is small and 95%CI crosses the clinical decision threshold.
- 6 This outcome was not a predetermined measurement item in two RCTs with large weights.
- 7 Sample size is small and 95%CI is wide and crosses the clinical decision threshold

**Evidence-to-Decision table**

**CQ7: Should prone positioning be performed in adult patients with ARDS?**

PATIENTS: ADULT ARDS

INTERVENTION: PRONE POSITION MANAGEMENT

| CRITERIA                                                                                                |                                                                                                                                                                                                                                               | JUDGEMENTS                                                                                                                                                                                                                                                                                                                                              | RESEARCH EVIDENCE                                                                                                                                                                                                                                                                                                                                                                                                                                                                                                                                                                                                                                                                                                                                                                                                                                                                                                                                                                                                                                                                                                                                                                                                                                                                                                                                                                                                                                                                                                                                                                                                                                                                                                                                                                                                                                                                                                                                                                                                                                                                                                                                                                      |                                                 |                               |  | ADDITIONAL CONSIDERATIONS |                     |                                   |                                     |                               |                                     |                                                       |                        |                                                |                                                       |            |                        |                                                          |            |                        |                                                 |                                                        |                  |                        |                                                 |                       |            |                        |                                                |            |                        |                                                 |                                                       |            |                        |                                              |                       |            |                        |                                              |            |                        |                                                |                                                          |           |                       |                                             |                       |           |                     |                                            |           |                       |                                             |  |
|---------------------------------------------------------------------------------------------------------|-----------------------------------------------------------------------------------------------------------------------------------------------------------------------------------------------------------------------------------------------|---------------------------------------------------------------------------------------------------------------------------------------------------------------------------------------------------------------------------------------------------------------------------------------------------------------------------------------------------------|----------------------------------------------------------------------------------------------------------------------------------------------------------------------------------------------------------------------------------------------------------------------------------------------------------------------------------------------------------------------------------------------------------------------------------------------------------------------------------------------------------------------------------------------------------------------------------------------------------------------------------------------------------------------------------------------------------------------------------------------------------------------------------------------------------------------------------------------------------------------------------------------------------------------------------------------------------------------------------------------------------------------------------------------------------------------------------------------------------------------------------------------------------------------------------------------------------------------------------------------------------------------------------------------------------------------------------------------------------------------------------------------------------------------------------------------------------------------------------------------------------------------------------------------------------------------------------------------------------------------------------------------------------------------------------------------------------------------------------------------------------------------------------------------------------------------------------------------------------------------------------------------------------------------------------------------------------------------------------------------------------------------------------------------------------------------------------------------------------------------------------------------------------------------------------------|-------------------------------------------------|-------------------------------|--|---------------------------|---------------------|-----------------------------------|-------------------------------------|-------------------------------|-------------------------------------|-------------------------------------------------------|------------------------|------------------------------------------------|-------------------------------------------------------|------------|------------------------|----------------------------------------------------------|------------|------------------------|-------------------------------------------------|--------------------------------------------------------|------------------|------------------------|-------------------------------------------------|-----------------------|------------|------------------------|------------------------------------------------|------------|------------------------|-------------------------------------------------|-------------------------------------------------------|------------|------------------------|----------------------------------------------|-----------------------|------------|------------------------|----------------------------------------------|------------|------------------------|------------------------------------------------|----------------------------------------------------------|-----------|-----------------------|---------------------------------------------|-----------------------|-----------|---------------------|--------------------------------------------|-----------|-----------------------|---------------------------------------------|--|
| PROBLEM                                                                                                 | Is there a problem priority?                                                                                                                                                                                                                  | <input type="radio"/> No<br><input type="radio"/> Probably no<br><input checked="" type="radio"/> Probably yes<br><input type="radio"/> Yes<br>-----<br><input type="radio"/> Varies<br><input type="radio"/> Don't know                                                                                                                                | Prone positioning is expected to be effective for ARDS because of pathophysiological improvement in respiratory mechanics, oxygenation, and hemodynamics or prevention of VILI. <sup>1,2</sup> Although many RCTs and their meta-analyses on prone positioning for ARDS have been conducted, the results are not consistent, and therefore, the effects of prone positioning for ARDS are controversial. <sup>3-7</sup> As prone positioning can be performed without specialized equipment, to examine the effectiveness of prone positioning for ARDS is considered a high priority.                                                                                                                                                                                                                                                                                                                                                                                                                                                                                                                                                                                                                                                                                                                                                                                                                                                                                                                                                                                                                                                                                                                                                                                                                                                                                                                                                                                                                                                                                                                                                                                                 |                                                 |                               |  |                           |                     |                                   |                                     |                               |                                     |                                                       |                        |                                                |                                                       |            |                        |                                                          |            |                        |                                                 |                                                        |                  |                        |                                                 |                       |            |                        |                                                |            |                        |                                                 |                                                       |            |                        |                                              |                       |            |                        |                                              |            |                        |                                                |                                                          |           |                       |                                             |                       |           |                     |                                            |           |                       |                                             |  |
|                                                                                                         | What is the overall certainty of the evidence of effects?                                                                                                                                                                                     | <input type="radio"/> Very low<br><input checked="" type="radio"/> Low<br><input type="radio"/> Moderate<br><input type="radio"/> High<br>-----<br><input type="radio"/> No included studies                                                                                                                                                            | <b>The relative importance or values of the main outcomes of interest:</b> <table border="1"> <thead> <tr> <th>Outcome</th> <th>Relative importance</th> <th>Certainty of the evidence (GRADE)</th> </tr> </thead> <tbody> <tr> <td>Short-term mortality<sup>(1)</sup></td> <td>CRITICAL</td> <td>⊕⊕⊕○<br/>MODERATE</td> </tr> <tr> <td>Short-term mortality (moderate/severe)<sup>(2)</sup></td> <td>CRITICAL</td> <td>⊕⊕○○<br/>LOW</td> </tr> <tr> <td>Short-term mortality (prolonged prone)<sup>(3)</sup></td> <td>CRITICAL</td> <td>⊕⊕○○<br/>LOW</td> </tr> <tr> <td>Tracheal tube trouble (unplanned extubation/dislocation)</td> <td>CRITICAL</td> <td>⊕⊕○○<br/>LOW</td> </tr> <tr> <td>Pressure ulcer</td> <td>IMPORTANT</td> <td>⊕⊕⊕○<br/>MODERATE</td> </tr> </tbody> </table>                                                                                                                                                                                                                                                                                                                                                                                                                                                                                                                                                                                                                                                                                                                                                                                                                                                                                                                                                                                                                                                                                                                                                                                                                                                                                                                                                                                               |                                                 |                               |  | Outcome                   | Relative importance | Certainty of the evidence (GRADE) | Short-term mortality <sup>(1)</sup> | CRITICAL                      | ⊕⊕⊕○<br>MODERATE                    | Short-term mortality (moderate/severe) <sup>(2)</sup> | CRITICAL               | ⊕⊕○○<br>LOW                                    | Short-term mortality (prolonged prone) <sup>(3)</sup> | CRITICAL   | ⊕⊕○○<br>LOW            | Tracheal tube trouble (unplanned extubation/dislocation) | CRITICAL   | ⊕⊕○○<br>LOW            | Pressure ulcer                                  | IMPORTANT                                              | ⊕⊕⊕○<br>MODERATE |                        |                                                 |                       |            |                        |                                                |            |                        |                                                 |                                                       |            |                        |                                              |                       |            |                        |                                              |            |                        |                                                |                                                          |           |                       |                                             |                       |           |                     |                                            |           |                       |                                             |  |
| Outcome                                                                                                 | Relative importance                                                                                                                                                                                                                           | Certainty of the evidence (GRADE)                                                                                                                                                                                                                                                                                                                       |                                                                                                                                                                                                                                                                                                                                                                                                                                                                                                                                                                                                                                                                                                                                                                                                                                                                                                                                                                                                                                                                                                                                                                                                                                                                                                                                                                                                                                                                                                                                                                                                                                                                                                                                                                                                                                                                                                                                                                                                                                                                                                                                                                                        |                                                 |                               |  |                           |                     |                                   |                                     |                               |                                     |                                                       |                        |                                                |                                                       |            |                        |                                                          |            |                        |                                                 |                                                        |                  |                        |                                                 |                       |            |                        |                                                |            |                        |                                                 |                                                       |            |                        |                                              |                       |            |                        |                                              |            |                        |                                                |                                                          |           |                       |                                             |                       |           |                     |                                            |           |                       |                                             |  |
| Short-term mortality <sup>(1)</sup>                                                                     | CRITICAL                                                                                                                                                                                                                                      | ⊕⊕⊕○<br>MODERATE                                                                                                                                                                                                                                                                                                                                        |                                                                                                                                                                                                                                                                                                                                                                                                                                                                                                                                                                                                                                                                                                                                                                                                                                                                                                                                                                                                                                                                                                                                                                                                                                                                                                                                                                                                                                                                                                                                                                                                                                                                                                                                                                                                                                                                                                                                                                                                                                                                                                                                                                                        |                                                 |                               |  |                           |                     |                                   |                                     |                               |                                     |                                                       |                        |                                                |                                                       |            |                        |                                                          |            |                        |                                                 |                                                        |                  |                        |                                                 |                       |            |                        |                                                |            |                        |                                                 |                                                       |            |                        |                                              |                       |            |                        |                                              |            |                        |                                                |                                                          |           |                       |                                             |                       |           |                     |                                            |           |                       |                                             |  |
| Short-term mortality (moderate/severe) <sup>(2)</sup>                                                   | CRITICAL                                                                                                                                                                                                                                      | ⊕⊕○○<br>LOW                                                                                                                                                                                                                                                                                                                                             |                                                                                                                                                                                                                                                                                                                                                                                                                                                                                                                                                                                                                                                                                                                                                                                                                                                                                                                                                                                                                                                                                                                                                                                                                                                                                                                                                                                                                                                                                                                                                                                                                                                                                                                                                                                                                                                                                                                                                                                                                                                                                                                                                                                        |                                                 |                               |  |                           |                     |                                   |                                     |                               |                                     |                                                       |                        |                                                |                                                       |            |                        |                                                          |            |                        |                                                 |                                                        |                  |                        |                                                 |                       |            |                        |                                                |            |                        |                                                 |                                                       |            |                        |                                              |                       |            |                        |                                              |            |                        |                                                |                                                          |           |                       |                                             |                       |           |                     |                                            |           |                       |                                             |  |
| Short-term mortality (prolonged prone) <sup>(3)</sup>                                                   | CRITICAL                                                                                                                                                                                                                                      | ⊕⊕○○<br>LOW                                                                                                                                                                                                                                                                                                                                             |                                                                                                                                                                                                                                                                                                                                                                                                                                                                                                                                                                                                                                                                                                                                                                                                                                                                                                                                                                                                                                                                                                                                                                                                                                                                                                                                                                                                                                                                                                                                                                                                                                                                                                                                                                                                                                                                                                                                                                                                                                                                                                                                                                                        |                                                 |                               |  |                           |                     |                                   |                                     |                               |                                     |                                                       |                        |                                                |                                                       |            |                        |                                                          |            |                        |                                                 |                                                        |                  |                        |                                                 |                       |            |                        |                                                |            |                        |                                                 |                                                       |            |                        |                                              |                       |            |                        |                                              |            |                        |                                                |                                                          |           |                       |                                             |                       |           |                     |                                            |           |                       |                                             |  |
| Tracheal tube trouble (unplanned extubation/dislocation)                                                | CRITICAL                                                                                                                                                                                                                                      | ⊕⊕○○<br>LOW                                                                                                                                                                                                                                                                                                                                             |                                                                                                                                                                                                                                                                                                                                                                                                                                                                                                                                                                                                                                                                                                                                                                                                                                                                                                                                                                                                                                                                                                                                                                                                                                                                                                                                                                                                                                                                                                                                                                                                                                                                                                                                                                                                                                                                                                                                                                                                                                                                                                                                                                                        |                                                 |                               |  |                           |                     |                                   |                                     |                               |                                     |                                                       |                        |                                                |                                                       |            |                        |                                                          |            |                        |                                                 |                                                        |                  |                        |                                                 |                       |            |                        |                                                |            |                        |                                                 |                                                       |            |                        |                                              |                       |            |                        |                                              |            |                        |                                                |                                                          |           |                       |                                             |                       |           |                     |                                            |           |                       |                                             |  |
| Pressure ulcer                                                                                          | IMPORTANT                                                                                                                                                                                                                                     | ⊕⊕⊕○<br>MODERATE                                                                                                                                                                                                                                                                                                                                        |                                                                                                                                                                                                                                                                                                                                                                                                                                                                                                                                                                                                                                                                                                                                                                                                                                                                                                                                                                                                                                                                                                                                                                                                                                                                                                                                                                                                                                                                                                                                                                                                                                                                                                                                                                                                                                                                                                                                                                                                                                                                                                                                                                                        |                                                 |                               |  |                           |                     |                                   |                                     |                               |                                     |                                                       |                        |                                                |                                                       |            |                        |                                                          |            |                        |                                                 |                                                        |                  |                        |                                                 |                       |            |                        |                                                |            |                        |                                                 |                                                       |            |                        |                                              |                       |            |                        |                                              |            |                        |                                                |                                                          |           |                       |                                             |                       |           |                     |                                            |           |                       |                                             |  |
| BENEFITS & HARMS OF THE OPTIONS                                                                         | Is there important uncertainty about or variability in how much people value the main outcomes?                                                                                                                                               | <input type="radio"/> Important uncertainty or variability<br><input checked="" type="radio"/> Possibly important uncertainty or variability<br><input type="radio"/> Possibly no important uncertainty or variability<br><input type="radio"/> No important uncertainty or variability<br>-----<br><input type="radio"/> No known undesirable outcomes | <b>Summary of findings:</b> <table border="1"> <thead> <tr> <th>Outcome</th> <th>Supine position</th> <th>Prone position</th> <th>Absolute effect (95% CI)</th> <th>Relative effect (RR) (95% CI)</th> </tr> </thead> <tbody> <tr> <td rowspan="3">Short-term mortality<sup>(1)</sup></td> <td>330 / 1000</td> <td>254 / 1000 (205 ~ 317)</td> <td>76 fewer per 1000 (from 13 fewer to 125 fewer)</td> <td rowspan="3">RR 0.77 (0.62 ~ 0.96)</td> </tr> <tr> <td>250 / 1000</td> <td>193 / 1000 (155 ~ 240)</td> <td>57 fewer per 1000 (from 10 fewer to 95 fewer)</td> </tr> <tr> <td>526 / 1000</td> <td>405 / 1000 (326 ~ 505)</td> <td>121 fewer per 1000 (from 21 fewer to 200 fewer)</td> </tr> <tr> <td rowspan="3">Short-term mortality (moderate/ severe)<sup>(2)</sup></td> <td>367 / 1000</td> <td>261 / 1000 (191 ~ 356)</td> <td>106 fewer per 1000 (from 11 fewer to 176 fewer)</td> <td rowspan="3">RR 0.71 (0.52 ~ 0.97)</td> </tr> <tr> <td>328 / 1000</td> <td>233 / 1000 (171 ~ 318)</td> <td>95 fewer per 1000 (from 10 fewer to 157 fewer)</td> </tr> <tr> <td>526 / 1000</td> <td>373 / 1000 (274 ~ 510)</td> <td>153 fewer per 1000 (from 16 fewer to 252 fewer)</td> </tr> <tr> <td rowspan="3">Short-term mortality (prolonged prone)<sup>(3)</sup></td> <td>340 / 1000</td> <td>262 / 1000 (197 ~ 347)</td> <td>78 fewer per 1000 (from 7 more to 143 fewer)</td> <td rowspan="3">RR 0.77 (0.58 ~ 1.02)</td> </tr> <tr> <td>315 / 1000</td> <td>243 / 1000 (183 ~ 321)</td> <td>72 fewer per 1000 (from 6 more to 132 fewer)</td> </tr> <tr> <td>526 / 1000</td> <td>405 / 1000 (305 ~ 537)</td> <td>121 fewer per 1000 (from 11 more to 221 fewer)</td> </tr> <tr> <td rowspan="3">Tracheal tube trouble (unplanned extubation/dislocation)</td> <td>78 / 1000</td> <td>101 / 1000 (68 ~ 149)</td> <td>23 more per 1000 (from 10 fewer to 71 more)</td> <td rowspan="3">RR 1.29 (0.87 ~ 1.91)</td> </tr> <tr> <td>46 / 1000</td> <td>59 / 1000 (40 ~ 88)</td> <td>13 more per 1000 (from 6 fewer to 42 more)</td> </tr> <tr> <td>99 / 1000</td> <td>128 / 1000 (86 ~ 189)</td> <td>29 more per 1000 (from 13 fewer to 90 more)</td> </tr> </tbody> </table> |                                                 |                               |  | Outcome                   | Supine position     | Prone position                    | Absolute effect (95% CI)            | Relative effect (RR) (95% CI) | Short-term mortality <sup>(1)</sup> | 330 / 1000                                            | 254 / 1000 (205 ~ 317) | 76 fewer per 1000 (from 13 fewer to 125 fewer) | RR 0.77 (0.62 ~ 0.96)                                 | 250 / 1000 | 193 / 1000 (155 ~ 240) | 57 fewer per 1000 (from 10 fewer to 95 fewer)            | 526 / 1000 | 405 / 1000 (326 ~ 505) | 121 fewer per 1000 (from 21 fewer to 200 fewer) | Short-term mortality (moderate/ severe) <sup>(2)</sup> | 367 / 1000       | 261 / 1000 (191 ~ 356) | 106 fewer per 1000 (from 11 fewer to 176 fewer) | RR 0.71 (0.52 ~ 0.97) | 328 / 1000 | 233 / 1000 (171 ~ 318) | 95 fewer per 1000 (from 10 fewer to 157 fewer) | 526 / 1000 | 373 / 1000 (274 ~ 510) | 153 fewer per 1000 (from 16 fewer to 252 fewer) | Short-term mortality (prolonged prone) <sup>(3)</sup> | 340 / 1000 | 262 / 1000 (197 ~ 347) | 78 fewer per 1000 (from 7 more to 143 fewer) | RR 0.77 (0.58 ~ 1.02) | 315 / 1000 | 243 / 1000 (183 ~ 321) | 72 fewer per 1000 (from 6 more to 132 fewer) | 526 / 1000 | 405 / 1000 (305 ~ 537) | 121 fewer per 1000 (from 11 more to 221 fewer) | Tracheal tube trouble (unplanned extubation/dislocation) | 78 / 1000 | 101 / 1000 (68 ~ 149) | 23 more per 1000 (from 10 fewer to 71 more) | RR 1.29 (0.87 ~ 1.91) | 46 / 1000 | 59 / 1000 (40 ~ 88) | 13 more per 1000 (from 6 fewer to 42 more) | 99 / 1000 | 128 / 1000 (86 ~ 189) | 29 more per 1000 (from 13 fewer to 90 more) |  |
|                                                                                                         | Outcome                                                                                                                                                                                                                                       | Supine position                                                                                                                                                                                                                                                                                                                                         | Prone position                                                                                                                                                                                                                                                                                                                                                                                                                                                                                                                                                                                                                                                                                                                                                                                                                                                                                                                                                                                                                                                                                                                                                                                                                                                                                                                                                                                                                                                                                                                                                                                                                                                                                                                                                                                                                                                                                                                                                                                                                                                                                                                                                                         | Absolute effect (95% CI)                        | Relative effect (RR) (95% CI) |  |                           |                     |                                   |                                     |                               |                                     |                                                       |                        |                                                |                                                       |            |                        |                                                          |            |                        |                                                 |                                                        |                  |                        |                                                 |                       |            |                        |                                                |            |                        |                                                 |                                                       |            |                        |                                              |                       |            |                        |                                              |            |                        |                                                |                                                          |           |                       |                                             |                       |           |                     |                                            |           |                       |                                             |  |
|                                                                                                         | Short-term mortality <sup>(1)</sup>                                                                                                                                                                                                           | 330 / 1000                                                                                                                                                                                                                                                                                                                                              | 254 / 1000 (205 ~ 317)                                                                                                                                                                                                                                                                                                                                                                                                                                                                                                                                                                                                                                                                                                                                                                                                                                                                                                                                                                                                                                                                                                                                                                                                                                                                                                                                                                                                                                                                                                                                                                                                                                                                                                                                                                                                                                                                                                                                                                                                                                                                                                                                                                 | 76 fewer per 1000 (from 13 fewer to 125 fewer)  | RR 0.77 (0.62 ~ 0.96)         |  |                           |                     |                                   |                                     |                               |                                     |                                                       |                        |                                                |                                                       |            |                        |                                                          |            |                        |                                                 |                                                        |                  |                        |                                                 |                       |            |                        |                                                |            |                        |                                                 |                                                       |            |                        |                                              |                       |            |                        |                                              |            |                        |                                                |                                                          |           |                       |                                             |                       |           |                     |                                            |           |                       |                                             |  |
|                                                                                                         |                                                                                                                                                                                                                                               | 250 / 1000                                                                                                                                                                                                                                                                                                                                              | 193 / 1000 (155 ~ 240)                                                                                                                                                                                                                                                                                                                                                                                                                                                                                                                                                                                                                                                                                                                                                                                                                                                                                                                                                                                                                                                                                                                                                                                                                                                                                                                                                                                                                                                                                                                                                                                                                                                                                                                                                                                                                                                                                                                                                                                                                                                                                                                                                                 | 57 fewer per 1000 (from 10 fewer to 95 fewer)   |                               |  |                           |                     |                                   |                                     |                               |                                     |                                                       |                        |                                                |                                                       |            |                        |                                                          |            |                        |                                                 |                                                        |                  |                        |                                                 |                       |            |                        |                                                |            |                        |                                                 |                                                       |            |                        |                                              |                       |            |                        |                                              |            |                        |                                                |                                                          |           |                       |                                             |                       |           |                     |                                            |           |                       |                                             |  |
|                                                                                                         |                                                                                                                                                                                                                                               | 526 / 1000                                                                                                                                                                                                                                                                                                                                              | 405 / 1000 (326 ~ 505)                                                                                                                                                                                                                                                                                                                                                                                                                                                                                                                                                                                                                                                                                                                                                                                                                                                                                                                                                                                                                                                                                                                                                                                                                                                                                                                                                                                                                                                                                                                                                                                                                                                                                                                                                                                                                                                                                                                                                                                                                                                                                                                                                                 | 121 fewer per 1000 (from 21 fewer to 200 fewer) |                               |  |                           |                     |                                   |                                     |                               |                                     |                                                       |                        |                                                |                                                       |            |                        |                                                          |            |                        |                                                 |                                                        |                  |                        |                                                 |                       |            |                        |                                                |            |                        |                                                 |                                                       |            |                        |                                              |                       |            |                        |                                              |            |                        |                                                |                                                          |           |                       |                                             |                       |           |                     |                                            |           |                       |                                             |  |
|                                                                                                         | Short-term mortality (moderate/ severe) <sup>(2)</sup>                                                                                                                                                                                        | 367 / 1000                                                                                                                                                                                                                                                                                                                                              | 261 / 1000 (191 ~ 356)                                                                                                                                                                                                                                                                                                                                                                                                                                                                                                                                                                                                                                                                                                                                                                                                                                                                                                                                                                                                                                                                                                                                                                                                                                                                                                                                                                                                                                                                                                                                                                                                                                                                                                                                                                                                                                                                                                                                                                                                                                                                                                                                                                 | 106 fewer per 1000 (from 11 fewer to 176 fewer) | RR 0.71 (0.52 ~ 0.97)         |  |                           |                     |                                   |                                     |                               |                                     |                                                       |                        |                                                |                                                       |            |                        |                                                          |            |                        |                                                 |                                                        |                  |                        |                                                 |                       |            |                        |                                                |            |                        |                                                 |                                                       |            |                        |                                              |                       |            |                        |                                              |            |                        |                                                |                                                          |           |                       |                                             |                       |           |                     |                                            |           |                       |                                             |  |
|                                                                                                         |                                                                                                                                                                                                                                               | 328 / 1000                                                                                                                                                                                                                                                                                                                                              | 233 / 1000 (171 ~ 318)                                                                                                                                                                                                                                                                                                                                                                                                                                                                                                                                                                                                                                                                                                                                                                                                                                                                                                                                                                                                                                                                                                                                                                                                                                                                                                                                                                                                                                                                                                                                                                                                                                                                                                                                                                                                                                                                                                                                                                                                                                                                                                                                                                 | 95 fewer per 1000 (from 10 fewer to 157 fewer)  |                               |  |                           |                     |                                   |                                     |                               |                                     |                                                       |                        |                                                |                                                       |            |                        |                                                          |            |                        |                                                 |                                                        |                  |                        |                                                 |                       |            |                        |                                                |            |                        |                                                 |                                                       |            |                        |                                              |                       |            |                        |                                              |            |                        |                                                |                                                          |           |                       |                                             |                       |           |                     |                                            |           |                       |                                             |  |
|                                                                                                         |                                                                                                                                                                                                                                               | 526 / 1000                                                                                                                                                                                                                                                                                                                                              | 373 / 1000 (274 ~ 510)                                                                                                                                                                                                                                                                                                                                                                                                                                                                                                                                                                                                                                                                                                                                                                                                                                                                                                                                                                                                                                                                                                                                                                                                                                                                                                                                                                                                                                                                                                                                                                                                                                                                                                                                                                                                                                                                                                                                                                                                                                                                                                                                                                 | 153 fewer per 1000 (from 16 fewer to 252 fewer) |                               |  |                           |                     |                                   |                                     |                               |                                     |                                                       |                        |                                                |                                                       |            |                        |                                                          |            |                        |                                                 |                                                        |                  |                        |                                                 |                       |            |                        |                                                |            |                        |                                                 |                                                       |            |                        |                                              |                       |            |                        |                                              |            |                        |                                                |                                                          |           |                       |                                             |                       |           |                     |                                            |           |                       |                                             |  |
|                                                                                                         | Short-term mortality (prolonged prone) <sup>(3)</sup>                                                                                                                                                                                         | 340 / 1000                                                                                                                                                                                                                                                                                                                                              | 262 / 1000 (197 ~ 347)                                                                                                                                                                                                                                                                                                                                                                                                                                                                                                                                                                                                                                                                                                                                                                                                                                                                                                                                                                                                                                                                                                                                                                                                                                                                                                                                                                                                                                                                                                                                                                                                                                                                                                                                                                                                                                                                                                                                                                                                                                                                                                                                                                 | 78 fewer per 1000 (from 7 more to 143 fewer)    | RR 0.77 (0.58 ~ 1.02)         |  |                           |                     |                                   |                                     |                               |                                     |                                                       |                        |                                                |                                                       |            |                        |                                                          |            |                        |                                                 |                                                        |                  |                        |                                                 |                       |            |                        |                                                |            |                        |                                                 |                                                       |            |                        |                                              |                       |            |                        |                                              |            |                        |                                                |                                                          |           |                       |                                             |                       |           |                     |                                            |           |                       |                                             |  |
|                                                                                                         |                                                                                                                                                                                                                                               | 315 / 1000                                                                                                                                                                                                                                                                                                                                              | 243 / 1000 (183 ~ 321)                                                                                                                                                                                                                                                                                                                                                                                                                                                                                                                                                                                                                                                                                                                                                                                                                                                                                                                                                                                                                                                                                                                                                                                                                                                                                                                                                                                                                                                                                                                                                                                                                                                                                                                                                                                                                                                                                                                                                                                                                                                                                                                                                                 | 72 fewer per 1000 (from 6 more to 132 fewer)    |                               |  |                           |                     |                                   |                                     |                               |                                     |                                                       |                        |                                                |                                                       |            |                        |                                                          |            |                        |                                                 |                                                        |                  |                        |                                                 |                       |            |                        |                                                |            |                        |                                                 |                                                       |            |                        |                                              |                       |            |                        |                                              |            |                        |                                                |                                                          |           |                       |                                             |                       |           |                     |                                            |           |                       |                                             |  |
| 526 / 1000                                                                                              |                                                                                                                                                                                                                                               | 405 / 1000 (305 ~ 537)                                                                                                                                                                                                                                                                                                                                  | 121 fewer per 1000 (from 11 more to 221 fewer)                                                                                                                                                                                                                                                                                                                                                                                                                                                                                                                                                                                                                                                                                                                                                                                                                                                                                                                                                                                                                                                                                                                                                                                                                                                                                                                                                                                                                                                                                                                                                                                                                                                                                                                                                                                                                                                                                                                                                                                                                                                                                                                                         |                                                 |                               |  |                           |                     |                                   |                                     |                               |                                     |                                                       |                        |                                                |                                                       |            |                        |                                                          |            |                        |                                                 |                                                        |                  |                        |                                                 |                       |            |                        |                                                |            |                        |                                                 |                                                       |            |                        |                                              |                       |            |                        |                                              |            |                        |                                                |                                                          |           |                       |                                             |                       |           |                     |                                            |           |                       |                                             |  |
| Tracheal tube trouble (unplanned extubation/dislocation)                                                | 78 / 1000                                                                                                                                                                                                                                     | 101 / 1000 (68 ~ 149)                                                                                                                                                                                                                                                                                                                                   | 23 more per 1000 (from 10 fewer to 71 more)                                                                                                                                                                                                                                                                                                                                                                                                                                                                                                                                                                                                                                                                                                                                                                                                                                                                                                                                                                                                                                                                                                                                                                                                                                                                                                                                                                                                                                                                                                                                                                                                                                                                                                                                                                                                                                                                                                                                                                                                                                                                                                                                            | RR 1.29 (0.87 ~ 1.91)                           |                               |  |                           |                     |                                   |                                     |                               |                                     |                                                       |                        |                                                |                                                       |            |                        |                                                          |            |                        |                                                 |                                                        |                  |                        |                                                 |                       |            |                        |                                                |            |                        |                                                 |                                                       |            |                        |                                              |                       |            |                        |                                              |            |                        |                                                |                                                          |           |                       |                                             |                       |           |                     |                                            |           |                       |                                             |  |
|                                                                                                         | 46 / 1000                                                                                                                                                                                                                                     | 59 / 1000 (40 ~ 88)                                                                                                                                                                                                                                                                                                                                     | 13 more per 1000 (from 6 fewer to 42 more)                                                                                                                                                                                                                                                                                                                                                                                                                                                                                                                                                                                                                                                                                                                                                                                                                                                                                                                                                                                                                                                                                                                                                                                                                                                                                                                                                                                                                                                                                                                                                                                                                                                                                                                                                                                                                                                                                                                                                                                                                                                                                                                                             |                                                 |                               |  |                           |                     |                                   |                                     |                               |                                     |                                                       |                        |                                                |                                                       |            |                        |                                                          |            |                        |                                                 |                                                        |                  |                        |                                                 |                       |            |                        |                                                |            |                        |                                                 |                                                       |            |                        |                                              |                       |            |                        |                                              |            |                        |                                                |                                                          |           |                       |                                             |                       |           |                     |                                            |           |                       |                                             |  |
|                                                                                                         | 99 / 1000                                                                                                                                                                                                                                     | 128 / 1000 (86 ~ 189)                                                                                                                                                                                                                                                                                                                                   | 29 more per 1000 (from 13 fewer to 90 more)                                                                                                                                                                                                                                                                                                                                                                                                                                                                                                                                                                                                                                                                                                                                                                                                                                                                                                                                                                                                                                                                                                                                                                                                                                                                                                                                                                                                                                                                                                                                                                                                                                                                                                                                                                                                                                                                                                                                                                                                                                                                                                                                            |                                                 |                               |  |                           |                     |                                   |                                     |                               |                                     |                                                       |                        |                                                |                                                       |            |                        |                                                          |            |                        |                                                 |                                                        |                  |                        |                                                 |                       |            |                        |                                                |            |                        |                                                 |                                                       |            |                        |                                              |                       |            |                        |                                              |            |                        |                                                |                                                          |           |                       |                                             |                       |           |                     |                                            |           |                       |                                             |  |
| How substantial are the desirable anticipated effects?                                                  | <input type="radio"/> Trivial<br><input type="radio"/> Small<br><input checked="" type="radio"/> Moderate<br><input type="radio"/> Large<br>-----<br><input type="radio"/> Varies<br><input type="radio"/> Don't know                         |                                                                                                                                                                                                                                                                                                                                                         |                                                                                                                                                                                                                                                                                                                                                                                                                                                                                                                                                                                                                                                                                                                                                                                                                                                                                                                                                                                                                                                                                                                                                                                                                                                                                                                                                                                                                                                                                                                                                                                                                                                                                                                                                                                                                                                                                                                                                                                                                                                                                                                                                                                        |                                                 |                               |  |                           |                     |                                   |                                     |                               |                                     |                                                       |                        |                                                |                                                       |            |                        |                                                          |            |                        |                                                 |                                                        |                  |                        |                                                 |                       |            |                        |                                                |            |                        |                                                 |                                                       |            |                        |                                              |                       |            |                        |                                              |            |                        |                                                |                                                          |           |                       |                                             |                       |           |                     |                                            |           |                       |                                             |  |
| How substantial are the undesirable anticipated effects?                                                | <input type="radio"/> Large<br><input type="radio"/> Moderate<br><input type="radio"/> Small<br><input type="radio"/> Trivial<br>-----<br><input checked="" type="radio"/> Varies<br><input type="radio"/> Don't know                         |                                                                                                                                                                                                                                                                                                                                                         |                                                                                                                                                                                                                                                                                                                                                                                                                                                                                                                                                                                                                                                                                                                                                                                                                                                                                                                                                                                                                                                                                                                                                                                                                                                                                                                                                                                                                                                                                                                                                                                                                                                                                                                                                                                                                                                                                                                                                                                                                                                                                                                                                                                        |                                                 |                               |  |                           |                     |                                   |                                     |                               |                                     |                                                       |                        |                                                |                                                       |            |                        |                                                          |            |                        |                                                 |                                                        |                  |                        |                                                 |                       |            |                        |                                                |            |                        |                                                 |                                                       |            |                        |                                              |                       |            |                        |                                              |            |                        |                                                |                                                          |           |                       |                                             |                       |           |                     |                                            |           |                       |                                             |  |
| Does the balance between desirable effects and undesirable effects favour the option or the comparison? | <input type="radio"/> Favors the comparison<br><input type="radio"/> Probably favors the comparison<br><input type="radio"/> Does not favor either the intervention or the comparison<br><input checked="" type="radio"/> Probably favors the |                                                                                                                                                                                                                                                                                                                                                         |                                                                                                                                                                                                                                                                                                                                                                                                                                                                                                                                                                                                                                                                                                                                                                                                                                                                                                                                                                                                                                                                                                                                                                                                                                                                                                                                                                                                                                                                                                                                                                                                                                                                                                                                                                                                                                                                                                                                                                                                                                                                                                                                                                                        |                                                 |                               |  |                           |                     |                                   |                                     |                               |                                     |                                                       |                        |                                                |                                                       |            |                        |                                                          |            |                        |                                                 |                                                        |                  |                        |                                                 |                       |            |                        |                                                |            |                        |                                                 |                                                       |            |                        |                                              |                       |            |                        |                                              |            |                        |                                                |                                                          |           |                       |                                             |                       |           |                     |                                            |           |                       |                                             |  |

CQ07 Evidence-to-Decision table

|                |                                                                                                                                                                                                                                                                                                                                                                                                                                                                                                                           |                                                                                                                                                                                                                                                                                                                                                                                                                                                                                                                                                                                                                                                                                                                                                                                                                                                                                                                                                                                                                                                                                                                                                                                                                                                                                                 |                                                 |                          |  |       |  |                |            |                           |                                                 |                          |            |                           |                                                |            |                            |                                                 |
|----------------|---------------------------------------------------------------------------------------------------------------------------------------------------------------------------------------------------------------------------------------------------------------------------------------------------------------------------------------------------------------------------------------------------------------------------------------------------------------------------------------------------------------------------|-------------------------------------------------------------------------------------------------------------------------------------------------------------------------------------------------------------------------------------------------------------------------------------------------------------------------------------------------------------------------------------------------------------------------------------------------------------------------------------------------------------------------------------------------------------------------------------------------------------------------------------------------------------------------------------------------------------------------------------------------------------------------------------------------------------------------------------------------------------------------------------------------------------------------------------------------------------------------------------------------------------------------------------------------------------------------------------------------------------------------------------------------------------------------------------------------------------------------------------------------------------------------------------------------|-------------------------------------------------|--------------------------|--|-------|--|----------------|------------|---------------------------|-------------------------------------------------|--------------------------|------------|---------------------------|------------------------------------------------|------------|----------------------------|-------------------------------------------------|
|                | <p>intervention<br/> <input type="radio"/> Favors the intervention<br/>         -----<br/> <input type="radio"/> Varies<br/> <input type="radio"/> Don't know</p>                                                                                                                                                                                                                                                                                                                                                         | <table border="1" data-bbox="422 156 1452 436"> <tr> <td></td> <td></td> <td></td> <td>more)</td> <td></td> </tr> <tr> <td rowspan="3">Pressure ulcer</td> <td>316 / 1000</td> <td>429 / 1000<br/>(335 ~ 553)</td> <td>114 more per 1000<br/>(from 19 more to 237 more)</td> <td rowspan="3">RR 1.36<br/>(1.06 ~ 1.75)</td> </tr> <tr> <td>276 / 1000</td> <td>375 / 1000<br/>(293 ~ 483)</td> <td>99 more per 1000<br/>(from 17 more to 207 more)</td> </tr> <tr> <td>632 / 1000</td> <td>860 / 1000<br/>(670 ~ 1000)</td> <td>228 more per 1000<br/>(from 38 more to 474 more)</td> </tr> </table> <p>Summary: Prone positioning significantly reduced the mortality (RR 0.77, 95%CI 0.62 ~ 0.96). In a subanalysis of 4 RCTs which addressed moderate and severe ARDS (P/F ≤ 200), the mortality was significantly reduced (RR 0.71, 95%CI 0.52~0.97). In a subanalysis of 6 RCTs which addressed prolonged prone positioning (≥ 8 hours), although similar tendency was shown, there was no significant difference between prone and supine (RR 0.77, 95%CI 0.58~1.02). In addition, although prone positioning did not increase serious adverse events such as tracheal tube trouble (RR 1.29, 95%CI 0.87~1.91), it significantly increased pressure ulcer (RR 1.36, 95%CI 1.06~1.75).</p> |                                                 |                          |  | more) |  | Pressure ulcer | 316 / 1000 | 429 / 1000<br>(335 ~ 553) | 114 more per 1000<br>(from 19 more to 237 more) | RR 1.36<br>(1.06 ~ 1.75) | 276 / 1000 | 375 / 1000<br>(293 ~ 483) | 99 more per 1000<br>(from 17 more to 207 more) | 632 / 1000 | 860 / 1000<br>(670 ~ 1000) | 228 more per 1000<br>(from 38 more to 474 more) |
|                |                                                                                                                                                                                                                                                                                                                                                                                                                                                                                                                           |                                                                                                                                                                                                                                                                                                                                                                                                                                                                                                                                                                                                                                                                                                                                                                                                                                                                                                                                                                                                                                                                                                                                                                                                                                                                                                 | more)                                           |                          |  |       |  |                |            |                           |                                                 |                          |            |                           |                                                |            |                            |                                                 |
| Pressure ulcer | 316 / 1000                                                                                                                                                                                                                                                                                                                                                                                                                                                                                                                | 429 / 1000<br>(335 ~ 553)                                                                                                                                                                                                                                                                                                                                                                                                                                                                                                                                                                                                                                                                                                                                                                                                                                                                                                                                                                                                                                                                                                                                                                                                                                                                       | 114 more per 1000<br>(from 19 more to 237 more) | RR 1.36<br>(1.06 ~ 1.75) |  |       |  |                |            |                           |                                                 |                          |            |                           |                                                |            |                            |                                                 |
|                | 276 / 1000                                                                                                                                                                                                                                                                                                                                                                                                                                                                                                                | 375 / 1000<br>(293 ~ 483)                                                                                                                                                                                                                                                                                                                                                                                                                                                                                                                                                                                                                                                                                                                                                                                                                                                                                                                                                                                                                                                                                                                                                                                                                                                                       | 99 more per 1000<br>(from 17 more to 207 more)  |                          |  |       |  |                |            |                           |                                                 |                          |            |                           |                                                |            |                            |                                                 |
|                | 632 / 1000                                                                                                                                                                                                                                                                                                                                                                                                                                                                                                                | 860 / 1000<br>(670 ~ 1000)                                                                                                                                                                                                                                                                                                                                                                                                                                                                                                                                                                                                                                                                                                                                                                                                                                                                                                                                                                                                                                                                                                                                                                                                                                                                      | 228 more per 1000<br>(from 38 more to 474 more) |                          |  |       |  |                |            |                           |                                                 |                          |            |                           |                                                |            |                            |                                                 |
| 資源利用           | <p><b>How large are the resource requirements (costs)?</b><br/> <input type="radio"/> Large costs<br/> <input checked="" type="radio"/> Moderate costs<br/> <input type="radio"/> Negligible costs and savings<br/> <input type="radio"/> Moderate savings<br/> <input type="radio"/> Large savings<br/>         -----<br/> <input type="radio"/> Varies<br/> <input type="radio"/> Don't know</p>                                                                                                                        | <p>Changing position to prone requires more manpower than usual. Although there is a specialized bed that can reduce burden in manpower (e.g. RotoProne bed<sup>®</sup>), it takes a high cost and is not approved in Japan. In addition, prone positioning requires more careful monitoring than usual. However, even if considering the burden in manpower and cost, prone position has significant effects to reduce mortality without increase in severe adverse effects. Therefore, the benefit of prone positioning is greater than the burden in cost or resources.</p>                                                                                                                                                                                                                                                                                                                                                                                                                                                                                                                                                                                                                                                                                                                  |                                                 |                          |  |       |  |                |            |                           |                                                 |                          |            |                           |                                                |            |                            |                                                 |
|                | <p><b>Does the cost effectiveness of the option favour the option or the comparison?</b><br/> <input type="radio"/> Favors the comparison<br/> <input type="radio"/> Probably favors the comparison<br/> <input type="radio"/> Does not favor either the intervention or the comparison<br/> <input checked="" type="radio"/> Probably favors the intervention<br/> <input type="radio"/> Favors the intervention<br/>         -----<br/> <input type="radio"/> Varies<br/> <input type="radio"/> No included studies</p> | <p>Compared to the benefit of reducing mortality, increases in cost and manpower are within an allowance.</p>                                                                                                                                                                                                                                                                                                                                                                                                                                                                                                                                                                                                                                                                                                                                                                                                                                                                                                                                                                                                                                                                                                                                                                                   |                                                 |                          |  |       |  |                |            |                           |                                                 |                          |            |                           |                                                |            |                            |                                                 |
| EQUITY         | <p><b>What would be the impact on health equity?</b><br/> <input type="radio"/> Reduced<br/> <input type="radio"/> Probably reduced<br/> <input type="radio"/> Probably no impact<br/> <input checked="" type="radio"/> Probably increased<br/> <input type="radio"/> Increased<br/>         -----<br/> <input type="radio"/> Varies<br/> <input type="radio"/> Don't know</p>                                                                                                                                            | <p>Prone position can be performed at standard hospitals, especially at facilities that can provide intensive care for ARDS. However, the safety may differ among hospitals depending on staff resources. In addition, the effectiveness may vary according to patient's physical constitution or underlying disease.</p>                                                                                                                                                                                                                                                                                                                                                                                                                                                                                                                                                                                                                                                                                                                                                                                                                                                                                                                                                                       |                                                 |                          |  |       |  |                |            |                           |                                                 |                          |            |                           |                                                |            |                            |                                                 |
| ACCEPTABILITY  | <p><b>Is the option acceptable to key stakeholders?</b><br/> <input type="radio"/> No<br/> <input type="radio"/> Probably no<br/> <input checked="" type="radio"/> Probably yes<br/> <input type="radio"/> Yes<br/>         -----<br/> <input type="radio"/> Varies<br/> <input type="radio"/> Don't know</p>                                                                                                                                                                                                             | <p>Prone position itself is one of the common positions that everyone can take. However, someone may refuse it when he/she is forced to take prone position for a long time for therapeutic purposes.</p>                                                                                                                                                                                                                                                                                                                                                                                                                                                                                                                                                                                                                                                                                                                                                                                                                                                                                                                                                                                                                                                                                       |                                                 |                          |  |       |  |                |            |                           |                                                 |                          |            |                           |                                                |            |                            |                                                 |

|                    |                                                    |                                                                                                                                                                                                                                                                 |                                                                                                                                     |  |
|--------------------|----------------------------------------------------|-----------------------------------------------------------------------------------------------------------------------------------------------------------------------------------------------------------------------------------------------------------------|-------------------------------------------------------------------------------------------------------------------------------------|--|
| <b>FEASIBILITY</b> | <p><b>Is the option feasible to implement?</b></p> | <p> <input type="radio"/> No<br/> <input type="radio"/> Probably no<br/> <input checked="" type="radio"/> Probably yes<br/> <input type="radio"/> Yes<br/>           -----<br/> <input type="radio"/> Varies<br/> <input type="radio"/> Don't know         </p> | <p>Prone position can be performed if plural staff can be secured while changing position and after positioning for monitoring.</p> |  |
|--------------------|----------------------------------------------------|-----------------------------------------------------------------------------------------------------------------------------------------------------------------------------------------------------------------------------------------------------------------|-------------------------------------------------------------------------------------------------------------------------------------|--|



## Recommendation

| CQ7: Should prone positioning be performed in adult patients with ARDS? |                                                                                                                                                                                                                                                                                                                                                                                                                                                                                                                                                                                                                                                                                                                                                                                                                                                                                                                                                                                                                                                                                                                                                                                                                                                                                                                                                                                                                                                                                                                                                                                                                                                                                                                                                                                                                                                                                                                                                                                                                                                                                                                                                                                                                                                                                                                                                                                                                                                                                                                                                                                                                                                                                                                                                                                                                                                                                                                                                                                                                                                                                                                                            |                                                                                           |                                                                                                    |                                                                                           |                                                                                          |
|-------------------------------------------------------------------------|--------------------------------------------------------------------------------------------------------------------------------------------------------------------------------------------------------------------------------------------------------------------------------------------------------------------------------------------------------------------------------------------------------------------------------------------------------------------------------------------------------------------------------------------------------------------------------------------------------------------------------------------------------------------------------------------------------------------------------------------------------------------------------------------------------------------------------------------------------------------------------------------------------------------------------------------------------------------------------------------------------------------------------------------------------------------------------------------------------------------------------------------------------------------------------------------------------------------------------------------------------------------------------------------------------------------------------------------------------------------------------------------------------------------------------------------------------------------------------------------------------------------------------------------------------------------------------------------------------------------------------------------------------------------------------------------------------------------------------------------------------------------------------------------------------------------------------------------------------------------------------------------------------------------------------------------------------------------------------------------------------------------------------------------------------------------------------------------------------------------------------------------------------------------------------------------------------------------------------------------------------------------------------------------------------------------------------------------------------------------------------------------------------------------------------------------------------------------------------------------------------------------------------------------------------------------------------------------------------------------------------------------------------------------------------------------------------------------------------------------------------------------------------------------------------------------------------------------------------------------------------------------------------------------------------------------------------------------------------------------------------------------------------------------------------------------------------------------------------------------------------------------|-------------------------------------------------------------------------------------------|----------------------------------------------------------------------------------------------------|-------------------------------------------------------------------------------------------|------------------------------------------------------------------------------------------|
| Balance of consequences                                                 | Undesirable consequences <i>clearly outweigh</i> desirable consequences in most settings                                                                                                                                                                                                                                                                                                                                                                                                                                                                                                                                                                                                                                                                                                                                                                                                                                                                                                                                                                                                                                                                                                                                                                                                                                                                                                                                                                                                                                                                                                                                                                                                                                                                                                                                                                                                                                                                                                                                                                                                                                                                                                                                                                                                                                                                                                                                                                                                                                                                                                                                                                                                                                                                                                                                                                                                                                                                                                                                                                                                                                                   | Undesirable consequences <i>probably outweigh</i> desirable consequences in most settings | The balance between desirable and undesirable consequences is closely <i>balanced or uncertain</i> | Desirable consequences <i>probably outweigh</i> undesirable consequences in most settings | Desirable consequences <i>clearly outweigh</i> undesirable consequences in most settings |
| Judgement                                                               | <input type="radio"/>                                                                                                                                                                                                                                                                                                                                                                                                                                                                                                                                                                                                                                                                                                                                                                                                                                                                                                                                                                                                                                                                                                                                                                                                                                                                                                                                                                                                                                                                                                                                                                                                                                                                                                                                                                                                                                                                                                                                                                                                                                                                                                                                                                                                                                                                                                                                                                                                                                                                                                                                                                                                                                                                                                                                                                                                                                                                                                                                                                                                                                                                                                                      | <input type="radio"/>                                                                     | <input type="radio"/>                                                                              | <input checked="" type="radio"/>                                                          | <input type="radio"/>                                                                    |
| Type of recommendation                                                  | We recommend against offering this option                                                                                                                                                                                                                                                                                                                                                                                                                                                                                                                                                                                                                                                                                                                                                                                                                                                                                                                                                                                                                                                                                                                                                                                                                                                                                                                                                                                                                                                                                                                                                                                                                                                                                                                                                                                                                                                                                                                                                                                                                                                                                                                                                                                                                                                                                                                                                                                                                                                                                                                                                                                                                                                                                                                                                                                                                                                                                                                                                                                                                                                                                                  | We suggest not offering this option                                                       | We suggest offering this option                                                                    | We recommend offering this option                                                         |                                                                                          |
| Judgement                                                               | <input type="radio"/>                                                                                                                                                                                                                                                                                                                                                                                                                                                                                                                                                                                                                                                                                                                                                                                                                                                                                                                                                                                                                                                                                                                                                                                                                                                                                                                                                                                                                                                                                                                                                                                                                                                                                                                                                                                                                                                                                                                                                                                                                                                                                                                                                                                                                                                                                                                                                                                                                                                                                                                                                                                                                                                                                                                                                                                                                                                                                                                                                                                                                                                                                                                      | <input type="radio"/>                                                                     | <input checked="" type="radio"/>                                                                   | <input type="radio"/>                                                                     |                                                                                          |
| Recommendation                                                          | <b>We suggest prone positioning in adult patients with ARDS (especially in moderate and severe cases). (GRADE 2C, Strength of recommendation “weak recommendation” / Quality of evidence “low”)</b>                                                                                                                                                                                                                                                                                                                                                                                                                                                                                                                                                                                                                                                                                                                                                                                                                                                                                                                                                                                                                                                                                                                                                                                                                                                                                                                                                                                                                                                                                                                                                                                                                                                                                                                                                                                                                                                                                                                                                                                                                                                                                                                                                                                                                                                                                                                                                                                                                                                                                                                                                                                                                                                                                                                                                                                                                                                                                                                                        |                                                                                           |                                                                                                    |                                                                                           |                                                                                          |
| Justification                                                           | <p><b>Question:</b> Should prone positioning be performed in adult patients with ARDS?</p> <p><b>Patients:</b> Adult ARDS</p> <p><b>Interventions:</b> Prone positioning</p> <p><b>Comparison:</b> Supine positioning</p> <p><b>Outcomes:</b> Mortality, Adverse effects (Tracheal tube trouble, Pressure ulcer)</p> <p><b>Summary of the evidence:</b> We conducted a systematic review of RCTs on prone positioning for adult ARDS. In a meta-analysis of 8 RCTs, prone positioning significantly reduced the mortality (RR 0.77, 95%CI 0.62 ~ 0.96). In a subanalysis of 4 RCTs which addressed moderate and severe ARDS (P/F ≤ 200), the mortality was significantly reduced (RR 0.71, 95%CI 0.52 ~ 0.97). In a subanalysis of 6 RCTs which addressed prolonged prone positioning (≥ 8 hours), although similar tendency was shown, there was no significant difference between prone and supine (RR 0.77, 95%CI 0.58 ~ 1.02). In addition, although prone positioning did not increase serious adverse events such as tracheal tube trouble (RR 1.29, 95%CI 0.87 ~ 1.91), it significantly increased pressure ulcer (RR 1.36, 95%CI 1.06 ~ 1.75).</p> <p><b>Quality of the evidence:</b> All studies included in the meta-analysis were RCTs. RCTs examining mortality generally had low risk of bias but had inconsistency. There were no serious indirectness or imprecision. Publication bias could not be assessed because of small number of studies. The certainty of the evidence of effects of prone positioning for adult ARDS on mortality was evaluated as “moderate”. In the subanalysis focusing on moderate and severe ARDS cases, sample size was small. In the subanalysis focusing on prolonged prone positioning, confidence interval crossed clinical decision threshold. Thus, the certainty of the evidence for both of these two subanalyses was evaluated as “low” because of imprecision.</p> <p>As the meta-analysis addressing tracheal tube trouble included RCTs whose risk of bias was not low and showed imprecision, the certainty of the evidence was evaluated as “low”. The meta-analysis addressing pressure ulcer included RCTs whose risk of bias was low and did not show serious inconsistency or indirectness. However, because of the small number of studies and imprecision, the certainty of the evidence was evaluated as “moderate”. Thus, the overall certainty of the evidence was evaluated as “low”.</p> <p><b>Judgement of benefit and harm, resources and cost:</b> As prone positioning reduces mortality without significant increases of serious adverse events, benefit is greater than harm, resources and cost. However, it should be noted that the facilities which participated in the RCT were well experienced. During implementation, you should be careful of troubles with tubes and lines and occurrence of pressure ulcer.</p> <p><b>Recommendations:</b> <b>We suggest prone positioning in adult patients with ARDS (especially in moderate and severe cases). (GRADE 2C, Strength of recommendation “weak recommendation” / Quality of evidence “low”)</b></p> |                                                                                           |                                                                                                    |                                                                                           |                                                                                          |

|                                                 |                                                                                                                                                                                                                                                                                                                                                                                                                                                                                                                                                                                                                                                                                                                                                                                     |
|-------------------------------------------------|-------------------------------------------------------------------------------------------------------------------------------------------------------------------------------------------------------------------------------------------------------------------------------------------------------------------------------------------------------------------------------------------------------------------------------------------------------------------------------------------------------------------------------------------------------------------------------------------------------------------------------------------------------------------------------------------------------------------------------------------------------------------------------------|
|                                                 | <p><b>Additional considerations:</b> Among panelists, there was an opinion that “strong recommendation” is more preferable with emphasis on the effects of reduction of mortality. However, the certainty of the evidence is low and prone positioning requires experience. Additionally, implementation rate differs greatly between facilities. Thus, panel meeting decided prone positioning for adult ARDS as “weak recommendation”. As a supplemental explanation, this recommendation does not mean that prone positioning should be restricted to a certain facility that is well experienced in prone position management. Rather, organizing a system, including securing manpower and educating staff, for providing prone position management anywhere is important.</p> |
| <b>Subgroup considerations</b>                  | In subanalyses, although the estimate of effect of prolonged prone positioning ( $\geq 8$ hours) was similar, there was no significant difference. On the other hand, the effect of prone positioning for moderate and severe ARDS ( $P/F \leq 200$ ) was expected to be greater.                                                                                                                                                                                                                                                                                                                                                                                                                                                                                                   |
| <b>Implementation considerations</b>            | Plural practiced personnel are required when performing prone positioning. The effect of prone positioning may be insufficient if it is performed in a short time only when enough personnel can be secured. Knowing actual status of one’s own facility is required.                                                                                                                                                                                                                                                                                                                                                                                                                                                                                                               |
| <b>Monitoring and evaluation considerations</b> | Increase of blood pressure and heart rate due to stimulus, decrease of blood pressure due to fluid shift, arrhythmia, change in tidal volume or airway pressure due to decrease of lung-thorax compliance, obstruction, malposition, or unplanned extubation of tracheal tube, aspiration of oral secretions, flexion or unplanned removal of important tube and line, compression injury of eyeball or external genitals, pressure ulcer, peripheral neuropathy, vascular insufficiency of skin.                                                                                                                                                                                                                                                                                   |
| <b>Research possibilities</b>                   | Investigation for long-term mortality and functional prognosis as well as short-term mortality is required. In addition, study on optimal subject (severity) or optimal methods (i.e., duration or repetition) of prone positioning is required.                                                                                                                                                                                                                                                                                                                                                                                                                                                                                                                                    |

1) Short-term mortality was defined as 10-day, 28-day, 60-day, 90-day, or ICU mortality

2) Moderate and severe ARDS was defined as  $P/F \leq 200$

3) Prolonged prone positioning was defined as prone positioning  $\geq 8$  hours per day

#### Reference

1. Guerin C, Baboi L, Richard JC. Mechanisms of the effects of prone positioning in acute respiratory distress syndrome. *Intensive Care Med* **40**(11): 1634-42, 2014. PMID 25266133
2. Gattinoni L, Taccone P, Carlesso E, et al. Prone position in acute respiratory distress syndrome. Rationale, indications, and limits. *Am J Respir Crit Care Med* **188**(11): 1286-93, 2013. PMID 24134414
3. Bloomfield R, Noble DW, Sudlow A. Prone position for acute respiratory failure in adults. *Cochrane Database Syst Rev* **11**: CD008095, 2015. PMID 26561745
4. Sud S, Friedrich JO, Adhikari NK, et al. Effect of prone positioning during mechanical ventilation on mortality among patients with acute respiratory distress syndrome: a systematic review and meta-analysis. *CMAJ* **186**(10): E381-90, 2014. PMID 24863923

5. Beitler JR, Shaefi S, Montesi SB, et al. Prone positioning reduces mortality from acute respiratory distress syndrome in the low tidal volume era: a meta-analysis. *Intensive Care Med* **40**(3): 332-41, 2014. PMID 24435203
6. Lee JM, Bae W, Lee YJ, et al. The efficacy and safety of prone positional ventilation in acute respiratory distress syndrome: updated study-level meta-analysis of 11 randomized controlled trials. *Crit Care Med* **42**(5): 1252-62, 2014. PMID 24368348
7. Hu SL, He HL, Pan C, et al. The effect of prone positioning on mortality in patients with acute respiratory distress syndrome: a meta-analysis of randomized controlled trials. *Crit Care* **18**(3): R109, 2014. PMID 24887034

## CQ08. Study flow diagram

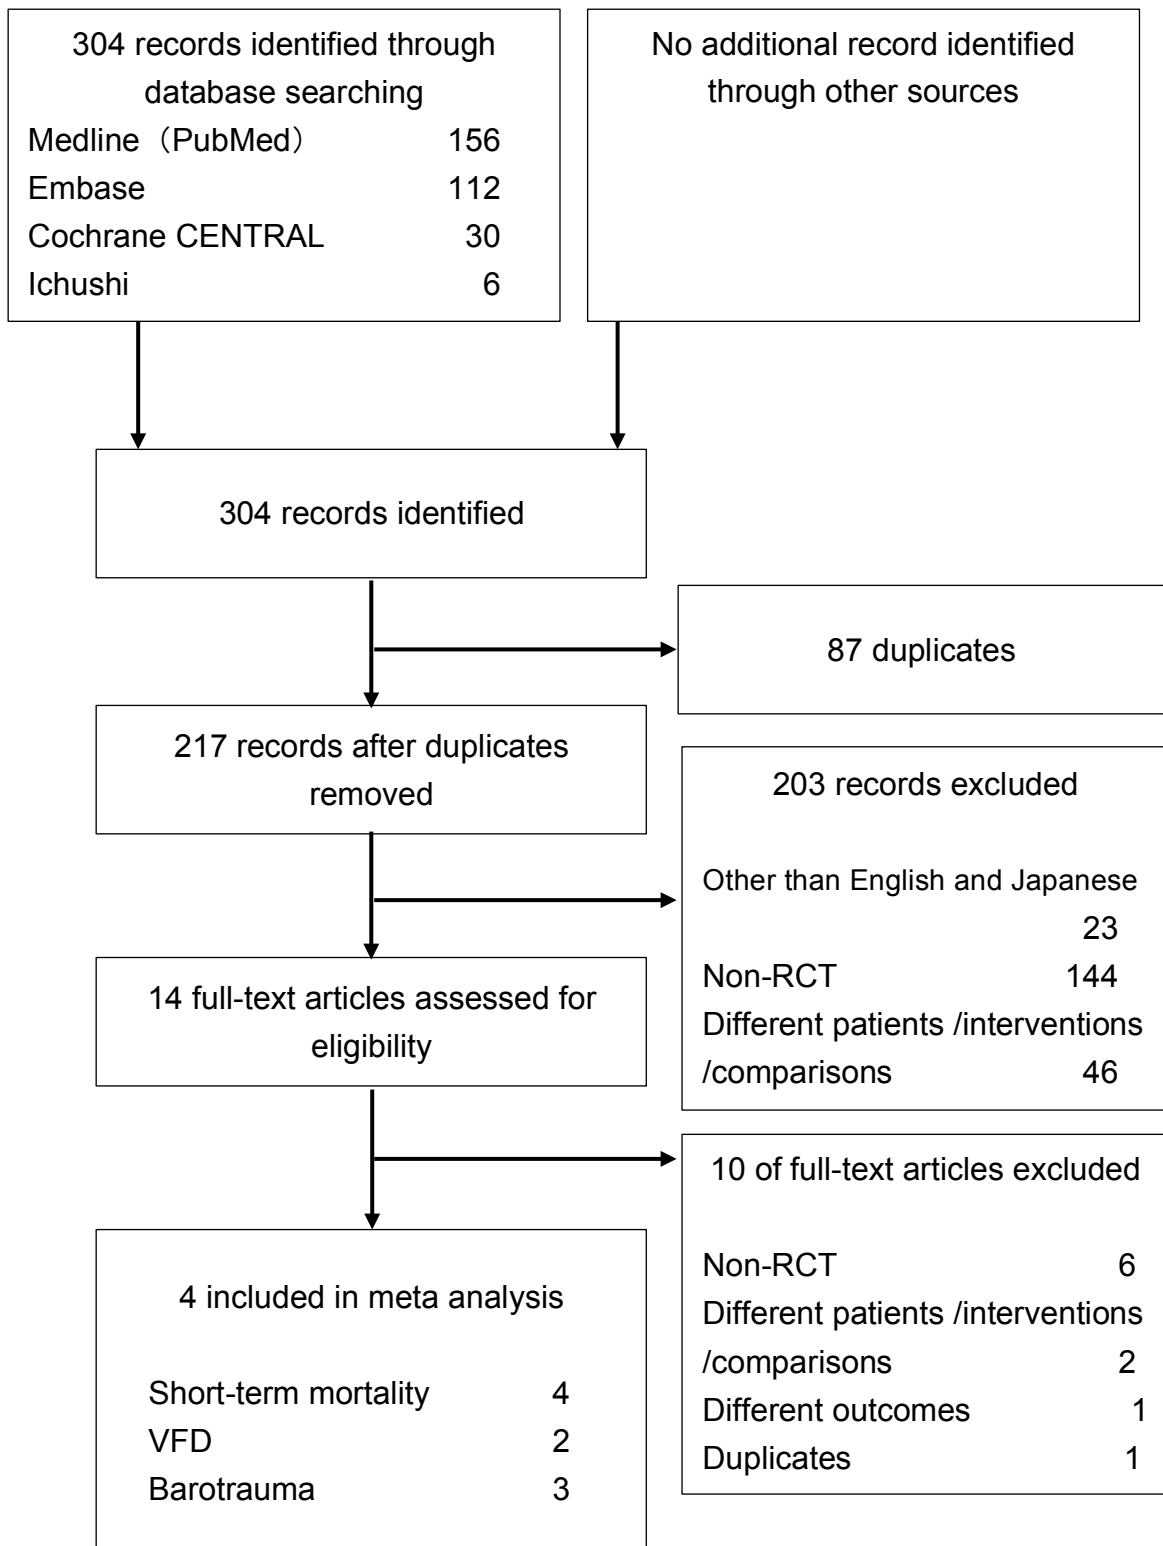

| Outcome |                            | Short term mortality                      |                                    | risk of bias                              |                               | serious (-1)                            |                                              |                                                                                        |                                              |
|---------|----------------------------|-------------------------------------------|------------------------------------|-------------------------------------------|-------------------------------|-----------------------------------------|----------------------------------------------|----------------------------------------------------------------------------------------|----------------------------------------------|
| 番号      | 著者名 発表年<br>(Forest plot表示) | risk of bias評価                            |                                    |                                           |                               |                                         |                                              |                                                                                        |                                              |
|         |                            | ランダム割付順序の生成<br>random sequence generation | 割り付けの隠蔽化<br>allocation concealment | ブラインド<br>blinding                         |                               | 不完全なアウトカムデータ<br>incomplete outcome data | 選択されたアウトカムの報告<br>selective outcome reporting | その他のバイアス<br>Other sources of bias                                                      | 研究内でのバイアスのリスク<br>Risk of bias within a study |
|         |                            |                                           |                                    | 研究参加者と治療提供者<br>participants and personnel | アウトカム評価者<br>outcome assessors |                                         |                                              |                                                                                        |                                              |
| 1       | Derdak 2002                | Low risk                                  | Unclear risk                       | High risk                                 | Unclear risk                  | Low risk                                | Low risk                                     | High risk                                                                              | High risk                                    |
| 2       | Bollen 2005                | Low risk                                  | Unclear risk                       | High risk                                 | High risk                     | Low risk                                | Low risk                                     | High risk                                                                              | High risk                                    |
| 3       | Young 2013                 | Low risk                                  | Unclear risk                       | High risk                                 | Unclear risk                  | Low risk                                | Low risk                                     | High risk                                                                              | High risk                                    |
| 4       | Ferguson 2013              | Low risk                                  | Low risk                           | High risk                                 | High risk                     | Low risk                                | Low risk                                     | High risk                                                                              | High risk                                    |
|         |                            |                                           |                                    |                                           |                               |                                         |                                              |                                                                                        |                                              |
| 番号      | 著者名 発表年<br>(Forest plot表示) | risk of biasコメント                          |                                    |                                           |                               |                                         |                                              |                                                                                        |                                              |
| 1       | Derdak 2002                | コンピュータで作成された乱数を使用                         | 記載が見当たらない                          | 人工呼吸器のモードの比較でありブラインド化はできない                | 記載が見当たらない                     | 100%フォローされた                             | 100%報告された                                    | クロスオーバーしている                                                                            | high riskが多い                                 |
| 2       | Bollen 2005                | コンピュータで作成された乱数を使用                         | 記載が見当たらない                          | 人工呼吸器のモードの比較でありブラインド化はできない                | ブラインド化されていない                  | 100%フォローされた                             | 100%報告された                                    | 患者選択のダイアグラムが提示されていないのでセレクションバイアスについては判断出来ない。その他バイアスについての情報が少なく判断出来ない。                  | high riskが多い                                 |
| 3       | Young 2013                 | コンピュータで作成された乱数を使用                         | 記載が見当たらない                          | 人工呼吸器のモードの比較でありブラインド化はできない                | 記載が見当たらない                     | 100%フォローされた                             | 100%報告された                                    | Eligibleな患者のうち半分以下しかランダム化に参加していない。試験に参加しなかった場合は従来モードで管理されることが補償されており、セレクションバイアスが危惧される。 | high riskが多い                                 |
| 4       | Ferguson 2013              | コンピュータで作成された乱数を使用                         | 研究者たちは全員、割り付けやブロックサイズを知らされていなかった。  | 人工呼吸器のモードの比較でありブラインド化はできない                | ブラインド化されていない                  | 100%フォローされた                             | 100%報告された                                    | Eligibleな患者のうち半分以下しかランダム化に参加していない。試験に参加しなかった場合は従来モードで管理されることが補償されており、セレクションバイアスが危惧される。 | high riskが多い                                 |

| Outcome |                            | VFD                                       | risk of bias                       |                                           | serious (-1)                  |                                         |                                              |                                                                                             |                                              |
|---------|----------------------------|-------------------------------------------|------------------------------------|-------------------------------------------|-------------------------------|-----------------------------------------|----------------------------------------------|---------------------------------------------------------------------------------------------|----------------------------------------------|
| 番号      | 著者名 発表年<br>(Forest plot表示) | risk of bias評価                            |                                    |                                           |                               |                                         |                                              |                                                                                             |                                              |
|         |                            | ランダム割付順序の生成<br>random sequence generation | 割り付けの隠蔽化<br>allocation concealment | ブラインド<br>blinding                         |                               | 不完全なアウトカムデータ<br>incomplete outcome data | 選択されたアウトカムの報告<br>selective outcome reporting | その他のバイアス<br>Other sources of bias                                                           | 研究内でのバイアスのリスク<br>Risk of bias within a study |
|         |                            |                                           |                                    | 研究参加者と治療提供者<br>participants and personnel | アウトカム評価者<br>outcome assessors |                                         |                                              |                                                                                             |                                              |
| 1       | Young 2013                 | Low risk                                  | Unclear risk                       | High risk                                 | Unclear risk                  | Low risk                                | Low risk                                     | High risk                                                                                   | High risk                                    |
| 2       | Ferguson 2013              | Low risk                                  | Low risk                           | High risk                                 | High risk                     | Low risk                                | Low risk                                     | High risk                                                                                   | High risk                                    |
|         |                            |                                           |                                    |                                           |                               |                                         |                                              |                                                                                             |                                              |
| 番号      | 著者名 発表年<br>(Forest plot表示) | risk of biasコメント                          |                                    |                                           |                               |                                         |                                              |                                                                                             |                                              |
| 1       | Young 2013                 | コンピュータで作成された乱数を使用                         | 記載が見当たらない                          | 人工呼吸器のモードの比較でありブラインド化はできない                | 記載が見当たらない                     | 100%フォローされた                             | 100%報告された                                    | Eligibleな患者のうち半分以下しかランダム化セッションに参加していない。試験に参加しなかった場合は従来のモードで管理されることが補償されており、セクションバイアスが危惧される。 | high riskが多い                                 |
| 2       | Ferguson 2013              | コンピュータで作成された乱数を使用                         | 研究者たちは全員、割り付けやブロックサイズを知らされていなかった。  | 人工呼吸器のモードの比較でありブラインド化はできない                | ブラインド化されていない                  | 100%フォローされた                             | 100%報告された                                    | Eligibleな患者のうち半分以下しかランダム化セッションに参加していない。試験に参加しなかった場合は従来のモードで管理されることが補償されており、セクションバイアスが危惧される。 | high riskが多い                                 |

| Outcome |                            | Barotrauma                                |                                    | risk of bias                              |                               | serious (-1)                            |                                              |                                                                                               |                                              |
|---------|----------------------------|-------------------------------------------|------------------------------------|-------------------------------------------|-------------------------------|-----------------------------------------|----------------------------------------------|-----------------------------------------------------------------------------------------------|----------------------------------------------|
| 番号      | 著者名 発表年<br>(Forest plot表示) | risk of bias評価                            |                                    |                                           |                               |                                         |                                              |                                                                                               |                                              |
|         |                            | ランダム割付順序の生成<br>random sequence generation | 割り付けの隠蔽化<br>allocation concealment | ブラインド<br>blinding                         |                               | 不完全なアウトカムデータ<br>incomplete outcome data | 選択されたアウトカムの報告<br>selective outcome reporting | その他のバイアス<br>Other sources of bias                                                             | 研究内でのバイアスのリスク<br>Risk of bias within a study |
|         |                            |                                           |                                    | 研究参加者と治療提供者<br>participants and personnel | アウトカム評価者<br>outcome assessors |                                         |                                              |                                                                                               |                                              |
| 1       | Derdak 2002                | Low risk                                  | Unclear risk                       | High risk                                 | Unclear risk                  | Low risk                                | Low risk                                     | High risk                                                                                     | High risk                                    |
| 2       | Bollen 2005                | Low risk                                  | Unclear risk                       | High risk                                 | High risk                     | Low risk                                | Low risk                                     | High risk                                                                                     | High risk                                    |
| 3       | Ferguson 2013              | Low risk                                  | Low risk                           | High risk                                 | High risk                     | Low risk                                | Low risk                                     | High risk                                                                                     | High risk                                    |
|         |                            |                                           |                                    |                                           |                               |                                         |                                              |                                                                                               |                                              |
| 番号      | 著者名 発表年<br>(Forest plot表示) | risk of biasコメント                          |                                    |                                           |                               |                                         |                                              |                                                                                               |                                              |
| 1       | Derdak 2002                | コンピュータで作成された乱数を使用                         | 記載が見当たらない                          | 人工呼吸器のモードの比較でありブラインド化はできない                | 記載が見当たらない                     | 100%フォローされた                             | 100%報告された                                    | クロスオーバーしている                                                                                   | high riskが多い                                 |
| 2       | Bollen 2005                | コンピュータで作成された乱数を使用                         | 記載が見当たらない                          | 人工呼吸器のモードの比較でありブラインド化はできない                | ブラインド化されていない                  | 100%フォローされた                             | 100%報告された                                    | 患者選択のダイアグラムが提示されていないのでセレクションバイアスについては判断出来ない。その他バイアスについての情報が少なく判断出来ない。                         | high riskが多い                                 |
| 3       | Ferguson 2013              | コンピュータで作成された乱数を使用                         | 研究者たちは全員、割り付けやブロックサイズを知らされていなかった。  | 人工呼吸器のモードの比較でありブラインド化はできない                | ブラインド化されていない                  | 100%フォローされた                             | 100%報告された                                    | Eligibleな患者のうち半分以下しかランダムマイゼーションに参加していない。試験に参加しなかった場合は従来のモードで管理されることが補償されており、セレクションバイアスが危惧される。 | high riskが多い                                 |

## Short term mortality

|               | Random sequence generation (selection bias) | Allocation concealment (selection bias) | Blinding of participants and personnel (performance bias) | Blinding of outcome assessment (detection bias) | Incomplete outcome data (attrition bias) | Selective reporting (reporting bias) | Other bias |
|---------------|---------------------------------------------|-----------------------------------------|-----------------------------------------------------------|-------------------------------------------------|------------------------------------------|--------------------------------------|------------|
| Bollen 2005   | +                                           | ?                                       | -                                                         | -                                               | +                                        | +                                    | -          |
| Derdak 2002   | +                                           | ?                                       | -                                                         | ?                                               | +                                        | +                                    | -          |
| Ferguson 2013 | +                                           | +                                       | -                                                         | -                                               | +                                        | +                                    | -          |
| Young 2013    | +                                           | ?                                       | -                                                         | ?                                               | +                                        | +                                    | -          |

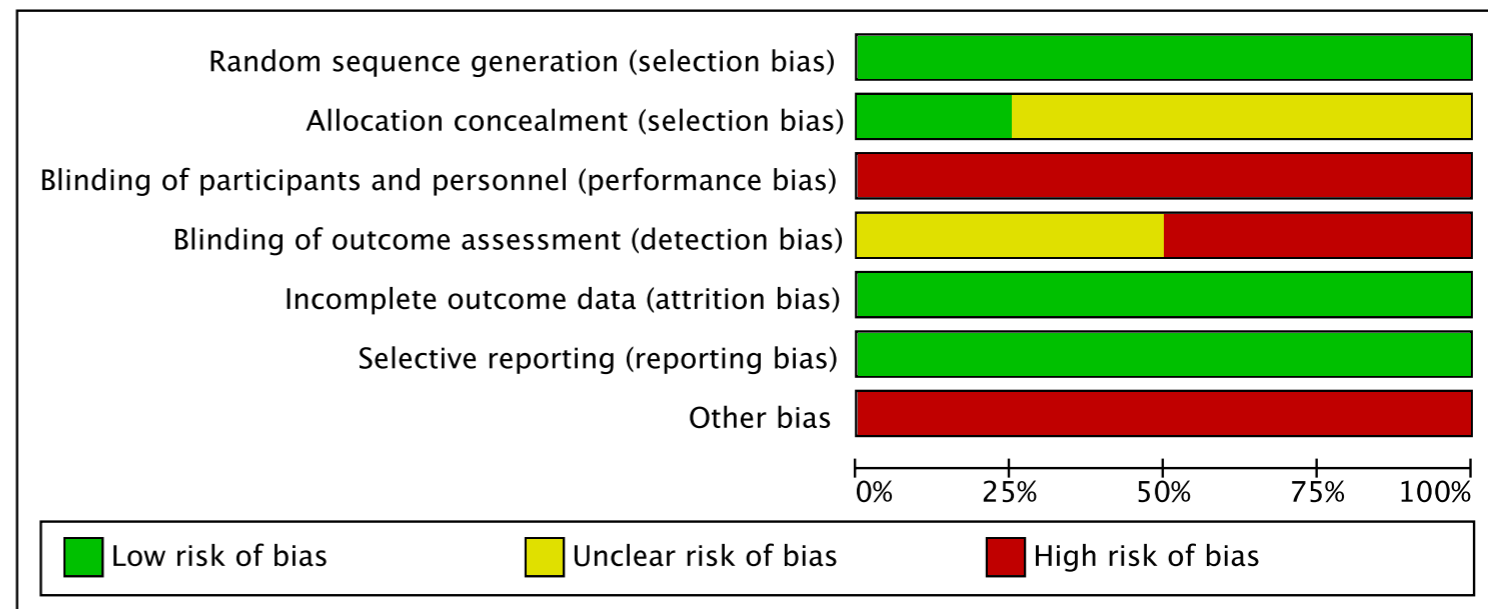



# VFD

|               | Random sequence generation (selection bias) | Allocation concealment (selection bias) | Blinding of participants and personnel (performance bias) | Blinding of outcome assessment (detection bias) | Incomplete outcome data (attrition bias) | Selective reporting (reporting bias) | Other bias |
|---------------|---------------------------------------------|-----------------------------------------|-----------------------------------------------------------|-------------------------------------------------|------------------------------------------|--------------------------------------|------------|
| Ferguson 2013 | +                                           | +                                       | -                                                         | -                                               | +                                        | +                                    | -          |
| Young 2013    | +                                           | ?                                       | -                                                         | ?                                               | +                                        | +                                    | -          |

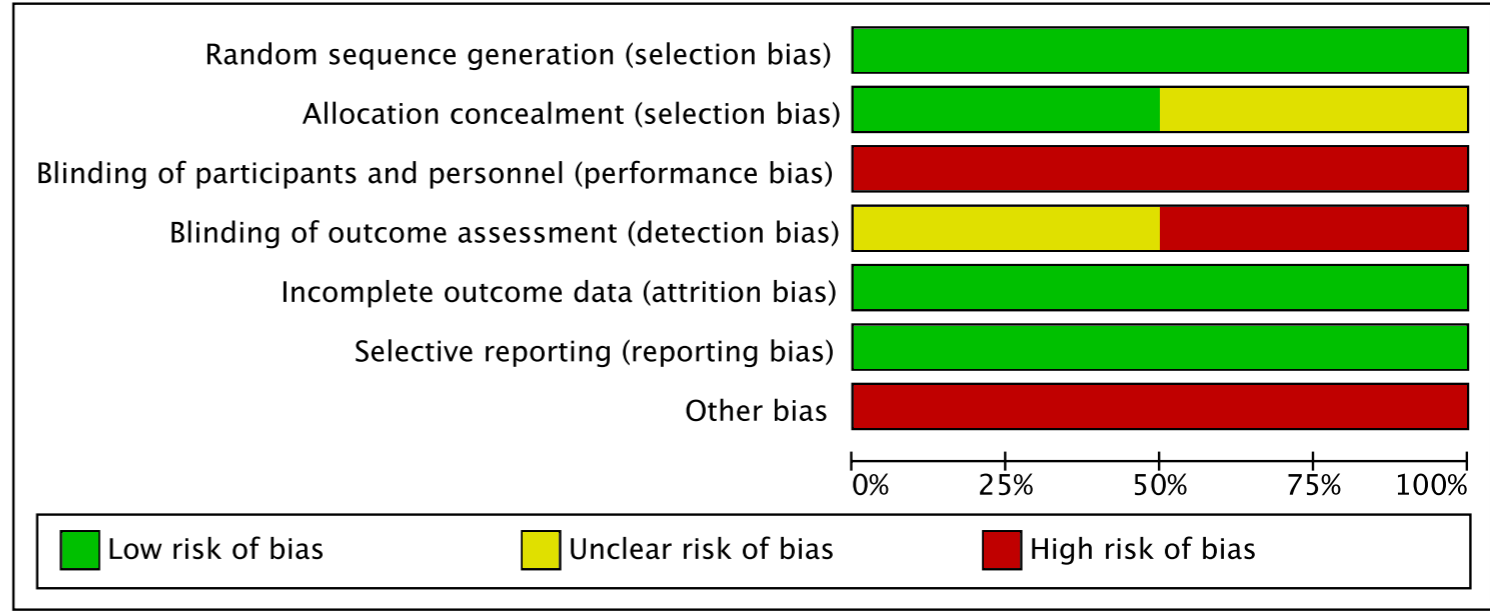

# Barotrauma

|               | Random sequence generation (selection bias) | Allocation concealment (selection bias) | Blinding of participants and personnel (performance bias) | Blinding of outcome assessment (detection bias) | Incomplete outcome data (attrition bias) | Selective reporting (reporting bias) | Other bias |
|---------------|---------------------------------------------|-----------------------------------------|-----------------------------------------------------------|-------------------------------------------------|------------------------------------------|--------------------------------------|------------|
| Bollen 2005   | +                                           | ?                                       | -                                                         | -                                               | +                                        | +                                    | -          |
| Derdak 2002   | +                                           | ?                                       | -                                                         | ?                                               | +                                        | +                                    | -          |
| Ferguson 2013 | +                                           | +                                       | -                                                         | -                                               | +                                        | +                                    | -          |

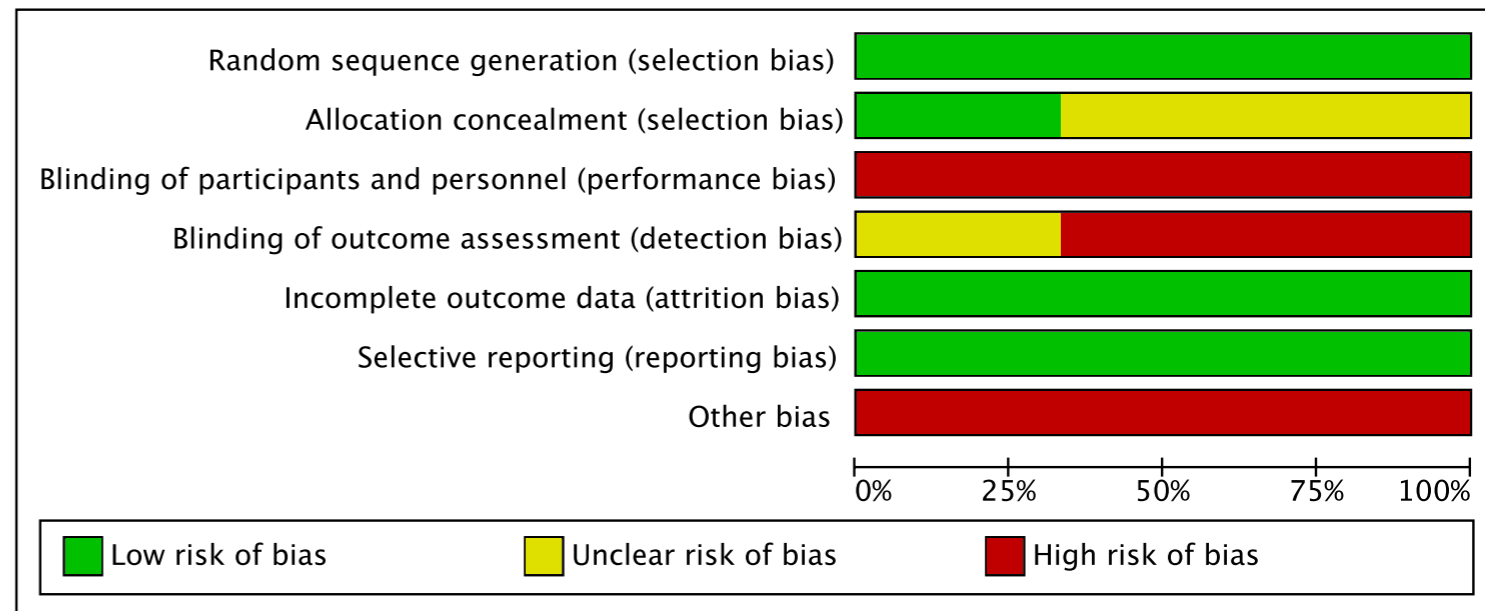

## Short term mortality

| Study or Subgroup     | HFOV   |            | CMV    |            | Weight        | Risk Ratio<br>M-H, Random, 95% CI |
|-----------------------|--------|------------|--------|------------|---------------|-----------------------------------|
|                       | Events | Total      | Events | Total      |               |                                   |
| Bollen 2005           | 16     | 37         | 8      | 24         | 10.6%         | 1.30 [0.66, 2.55]                 |
| Derdak 2002           | 28     | 75         | 38     | 73         | 22.2%         | 0.72 [0.50, 1.03]                 |
| Ferguson 2013         | 129    | 275        | 96     | 273        | 32.4%         | 1.33 [1.09, 1.64]                 |
| Young 2013            | 166    | 398        | 163    | 397        | 34.9%         | 1.02 [0.86, 1.20]                 |
| <b>Total (95% CI)</b> |        | <b>785</b> |        | <b>767</b> | <b>100.0%</b> | <b>1.05 [0.82, 1.36]</b>          |

Total events

339

305

Heterogeneity:  $\text{Tau}^2 = 0.04$ ;  $\text{Chi}^2 = 9.70$ ,  $\text{df} = 3$  ( $P = 0.02$ );  $I^2 = 69\%$ Test for overall effect:  $Z = 0.40$  ( $P = 0.69$ )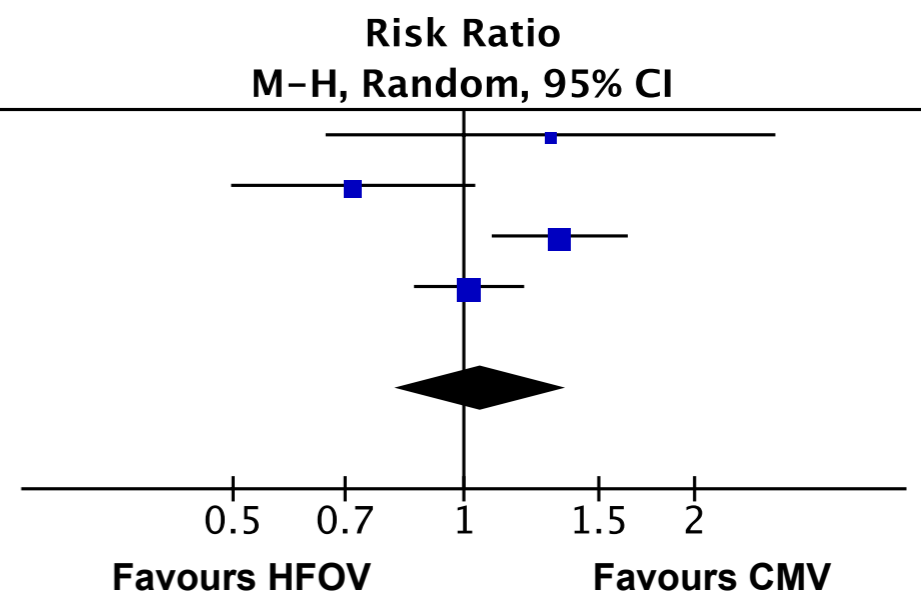

## VFD

| Study or Subgroup     | HFOV |     |            | CMV  |     |            | Weight        | Mean Difference<br>IV, Random, 95% CI |
|-----------------------|------|-----|------------|------|-----|------------|---------------|---------------------------------------|
|                       | Mean | SD  | Total      | Mean | SD  | Total      |               |                                       |
| Ferguson 2013         | 17.6 | 8.7 | 275        | 17.6 | 8.9 | 273        | 40.3%         | 0.00 [-1.47, 1.47]                    |
| Young 2013            | 17.1 | 8.6 | 398        | 17.6 | 8.8 | 397        | 59.7%         | -0.50 [-1.71, 0.71]                   |
| <b>Total (95% CI)</b> |      |     | <b>673</b> |      |     | <b>670</b> | <b>100.0%</b> | <b>-0.30 [-1.23, 0.64]</b>            |

Heterogeneity:  $\text{Tau}^2 = 0.00$ ;  $\text{Chi}^2 = 0.26$ ,  $\text{df} = 1$  ( $P = 0.61$ );  $I^2 = 0\%$ Test for overall effect:  $Z = 0.63$  ( $P = 0.53$ )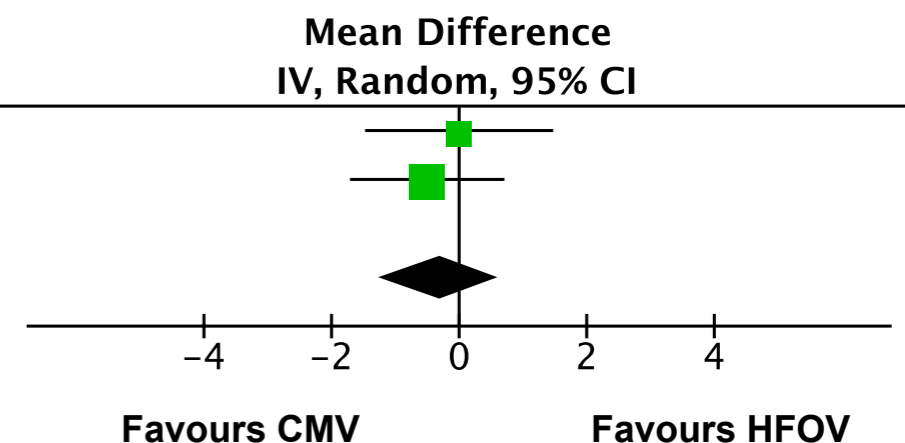

## Barotrauma

| Study or Subgroup     | HFOV   |            | CMV    |            | Weight        | Risk Ratio<br>M-H, Random, 95% CI |
|-----------------------|--------|------------|--------|------------|---------------|-----------------------------------|
|                       | Events | Total      | Events | Total      |               |                                   |
| Bollen 2005           | 1      | 37         | 1      | 24         | 1.9%          | 0.65 [0.04, 9.88]                 |
| Derdak 2002           | 7      | 75         | 9      | 73         | 15.9%         | 0.76 [0.30, 1.93]                 |
| Ferguson 2013         | 46     | 275        | 34     | 273        | 82.2%         | 1.34 [0.89, 2.02]                 |
| <b>Total (95% CI)</b> |        | <b>387</b> |        | <b>370</b> | <b>100.0%</b> | <b>1.21 [0.83, 1.76]</b>          |

Total events

54

44

Heterogeneity:  $\text{Tau}^2 = 0.00$ ;  $\text{Chi}^2 = 1.42$ ,  $\text{df} = 2$  ( $P = 0.49$ );  $I^2 = 0\%$ Test for overall effect:  $Z = 1.00$  ( $P = 0.32$ )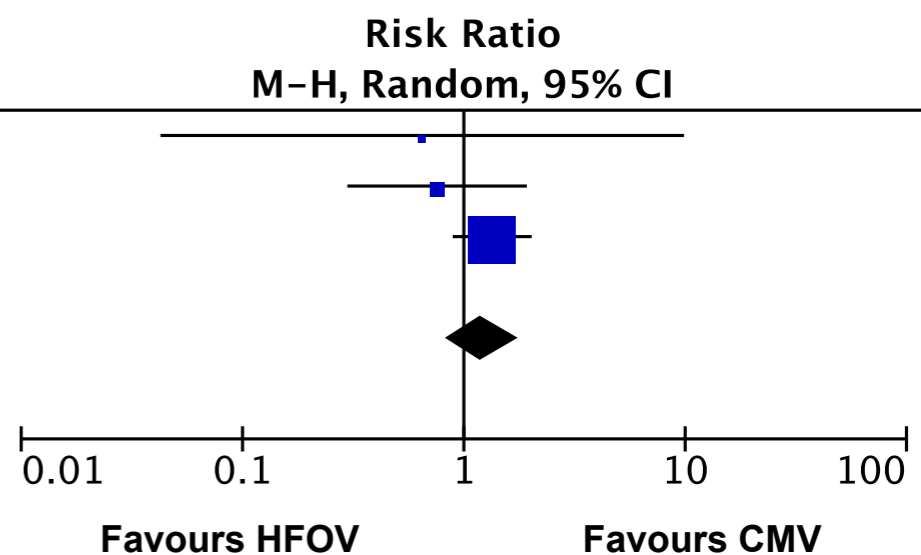

## Summary of findings:

### High Frequency Oscillation (HFO) compared to Conventional Mechanical Ventilation (CMV) for ARDS

Patient or population: ARDS

Intervention: High Frequency Oscillation (HFO)

Comparison: Conventional Mechanical Ventilation (CMV)

| Outcomes             | Anticipated absolute effects* (95% CI)              |                                                | Relative effect (95% CI)  | № of participants (studies) | Quality of the evidence (GRADE) | Comments |
|----------------------|-----------------------------------------------------|------------------------------------------------|---------------------------|-----------------------------|---------------------------------|----------|
|                      | Risk with Conventional Mechanical Ventilation (CMV) | Risk with High Frequency Oscillation (HFO)     |                           |                             |                                 |          |
| Short term mortality | Study population                                    |                                                | RR 1.05<br>(0.82 to 1.36) | 152<br>(4 RCTs)             | ⊕○○○<br>VERY<br>LOW 1 2 3       |          |
|                      | 398 per 1000                                        | 418 per 1000<br>(326 to 541)                   |                           |                             |                                 |          |
|                      | Low                                                 |                                                |                           |                             |                                 |          |
|                      | 352 per 1000                                        | 370 per 1000<br>(338 to 560)                   |                           |                             |                                 |          |
|                      | High                                                |                                                |                           |                             |                                 |          |
|                      | 412 per 1000                                        | 433 per 1000<br>(358 to 644)                   |                           |                             |                                 |          |
| VFD                  | Mean 17.6 days                                      | 0.3 days fewer MD<br>(1.23 fewer to 0.64 more) |                           | 1343<br>(2 RCTs)            | ⊕⊕○○<br>LOW 1 3                 |          |
| Barotrauma           | Study population                                    |                                                | RR 1.21<br>(0.83 to 1.76) | 757<br>(3 RCTs)             | ⊕○○○<br>VERY<br>LOW 1 3 4       |          |
|                      | 119 per 1000                                        | 144 per 1000<br>(99 to 209)                    |                           |                             |                                 |          |
|                      | Low                                                 |                                                |                           |                             |                                 |          |
|                      | 42 per 1000                                         | 51 per 1000<br>(35 to 74)                      |                           |                             |                                 |          |
|                      | High                                                |                                                |                           |                             |                                 |          |
|                      | 125 per 1000                                        | 151 per 1000<br>(104 to 220)                   |                           |                             |                                 |          |

\*The risk in the intervention group (and its 95% confidence interval) is based on the assumed risk in the comparison group and the relative effect of the intervention (and its 95% CI).

CI: Confidence interval; RR: Risk ratio;

#### GRADE Working Group grades of evidence

**High quality:** We are very confident that the true effect lies close to that of the estimate of the effect

**Moderate quality:** We are moderately confident in the effect estimate: The true effect is likely to be close to the estimate of the effect, but there is a possibility that it is substantially different

**Low quality:** Our confidence in the effect estimate is limited: The true effect may be substantially different from the estimate of the effect

**Very low quality:** We have very little confidence in the effect estimate: The true effect is likely to be substantially different from the estimate of effect

- 1 Since several studies included this analysis could not make physicians blinded to intervention, the quality of evidence was downgraded by one level.
- 2 Since the confidence interval is partially overlapped and the heterogeneity is significant with  $I^2=69\%$ , the quality of evidence was downgraded by one level.
- 3 Since the confidence interval is wide and is partially overlapped, the quality of evidence was downgraded by one level.
- 4 Since the sample size was very small, the quality of evidence was downgraded by one level.

**CQ8:****Question: Should High Frequency Oscillation be used in adult patients with ARDS?**

| Quality assessment   |                   |                      |                      |              |                             |                      | № of patients                    |                                           | Effect                 |                                               | Quality                           | Importance |
|----------------------|-------------------|----------------------|----------------------|--------------|-----------------------------|----------------------|----------------------------------|-------------------------------------------|------------------------|-----------------------------------------------|-----------------------------------|------------|
| № of studies         | Study design      | Risk of bias         | Inconsistency        | Indirectness | Imprecision                 | Other considerations | High Frequency Oscillation (HFO) | Conventional Mechanical Ventilation (CMV) | Relative (95% CI)      | Absolute (95% CI)                             |                                   |            |
| Short term mortality |                   |                      |                      |              |                             |                      |                                  |                                           |                        |                                               |                                   |            |
| 4                    | randomised trials | serious <sup>1</sup> | serious <sup>2</sup> | not serious  | serious <sup>3</sup>        | none                 | 339/785 (43.2%)                  | 305/767 (39.8%)                           | RR 1.05 (0.82 to 1.36) | 20 more per 1000 (from 72 fewer to 143 more)  | ⊕○○○<br>VERY LOW <sup>1,2,3</sup> | CRITICAL   |
|                      |                   |                      |                      |              |                             |                      |                                  | 35.2%                                     |                        | 18 more per 1000 (from 63 fewer to 127 more)  |                                   |            |
|                      |                   |                      |                      |              |                             |                      |                                  | 41.2%                                     |                        | 21 fewer per 1000 (from 74 fewer to 148 more) |                                   |            |
| VFD                  |                   |                      |                      |              |                             |                      |                                  |                                           |                        |                                               |                                   |            |
| 2                    | randomised trials | serious <sup>1</sup> | not serious          | not serious  | serious <sup>1</sup>        | none                 | 673                              | 670                                       |                        | MD 0.3 day fewer (1.23 fewer to 0.64 more)    | ⊕⊕○○<br>LOW <sup>1,3</sup>        | CRITICAL   |
| Barotrauma           |                   |                      |                      |              |                             |                      |                                  |                                           |                        |                                               |                                   |            |
| 3                    | randomised trials | serious <sup>1</sup> | not serious          | not serious  | very serious <sup>3,4</sup> | none                 | 54/387 (14.0%)                   | 44/370 (11.9%)                            | RR 1.21 (0.83 to 1.76) | 25 more per 1000 (from 20 fewer to 90 more)   | ⊕○○○<br>VERY LOW <sup>1,3,4</sup> | CRITICAL   |
|                      |                   |                      |                      |              |                             |                      |                                  | 4.2%                                      |                        | 9 more per 1000 (from 7 fewer to 32 more)     |                                   |            |
|                      |                   |                      |                      |              |                             |                      |                                  | 12.5%                                     |                        | 26 more per 1000 (from 21 fewer to 95 more)   |                                   |            |

CI: Confidence interval; RR: Risk ratio; MD: Mean difference

- 1 Since several studies included in this analysis could not blind physicians to the intervention, the quality of evidence was downgraded by one level.
- 2 Since the confidence interval is partially overlapped and the heterogeneity is significant with  $I^2=69\%$ , the quality of evidence was downgraded by one level.
- 3 Since the confidence interval is wide and is partially overlapped, the quality of evidence was downgraded by one level.
- 4 Since the sample size was very small, the quality of evidence was downgraded by one level.

**Evidence-to-Decision table**

| CQ8 : Should High Frequency Oscillation be used in adult patients with ARDS?                                                                                                                                                                                                                                                 |                                                                                                                                                                                                                                                                                                                                                                                                                                                                                                                                                                                       |                                                                                                                                                                                                                                                                                                                                                                                                                                                                                                                                                                                                                                                                                                                                                                                                                                                                                                                                                                                                                                                                                                                                                                                                                                                                                                                                                                                            |                                             |                                               |                           |                                                     |                                            |                                          |                          |                                          |                         |                         |                                              |                        |            |                         |                                              |            |                         |                                               |                         |                   |                  |                                            |   |            |            |                        |                                             |                        |           |                      |                                           |            |                         |                                             |  |
|------------------------------------------------------------------------------------------------------------------------------------------------------------------------------------------------------------------------------------------------------------------------------------------------------------------------------|---------------------------------------------------------------------------------------------------------------------------------------------------------------------------------------------------------------------------------------------------------------------------------------------------------------------------------------------------------------------------------------------------------------------------------------------------------------------------------------------------------------------------------------------------------------------------------------|--------------------------------------------------------------------------------------------------------------------------------------------------------------------------------------------------------------------------------------------------------------------------------------------------------------------------------------------------------------------------------------------------------------------------------------------------------------------------------------------------------------------------------------------------------------------------------------------------------------------------------------------------------------------------------------------------------------------------------------------------------------------------------------------------------------------------------------------------------------------------------------------------------------------------------------------------------------------------------------------------------------------------------------------------------------------------------------------------------------------------------------------------------------------------------------------------------------------------------------------------------------------------------------------------------------------------------------------------------------------------------------------|---------------------------------------------|-----------------------------------------------|---------------------------|-----------------------------------------------------|--------------------------------------------|------------------------------------------|--------------------------|------------------------------------------|-------------------------|-------------------------|----------------------------------------------|------------------------|------------|-------------------------|----------------------------------------------|------------|-------------------------|-----------------------------------------------|-------------------------|-------------------|------------------|--------------------------------------------|---|------------|------------|------------------------|---------------------------------------------|------------------------|-----------|----------------------|-------------------------------------------|------------|-------------------------|---------------------------------------------|--|
| POPULATION : ADULT PATIENTS ANTICIPATED TO REQUIRE LONG-TERM MECHANICAL VENTILATION                                                                                                                                                                                                                                          |                                                                                                                                                                                                                                                                                                                                                                                                                                                                                                                                                                                       |                                                                                                                                                                                                                                                                                                                                                                                                                                                                                                                                                                                                                                                                                                                                                                                                                                                                                                                                                                                                                                                                                                                                                                                                                                                                                                                                                                                            |                                             |                                               |                           |                                                     |                                            |                                          |                          |                                          |                         |                         |                                              |                        |            |                         |                                              |            |                         |                                               |                         |                   |                  |                                            |   |            |            |                        |                                             |                        |           |                      |                                           |            |                         |                                             |  |
| INTERVENTION : HIGH FREQUENCY OSCILLATION (HFO)                                                                                                                                                                                                                                                                              |                                                                                                                                                                                                                                                                                                                                                                                                                                                                                                                                                                                       |                                                                                                                                                                                                                                                                                                                                                                                                                                                                                                                                                                                                                                                                                                                                                                                                                                                                                                                                                                                                                                                                                                                                                                                                                                                                                                                                                                                            |                                             |                                               |                           |                                                     |                                            |                                          |                          |                                          |                         |                         |                                              |                        |            |                         |                                              |            |                         |                                               |                         |                   |                  |                                            |   |            |            |                        |                                             |                        |           |                      |                                           |            |                         |                                             |  |
| CRITERIA                                                                                                                                                                                                                                                                                                                     | JUDGEMENT                                                                                                                                                                                                                                                                                                                                                                                                                                                                                                                                                                             | RESEARCH EVIDENCE                                                                                                                                                                                                                                                                                                                                                                                                                                                                                                                                                                                                                                                                                                                                                                                                                                                                                                                                                                                                                                                                                                                                                                                                                                                                                                                                                                          |                                             |                                               | ADDITIONAL CONSIDERATIONS |                                                     |                                            |                                          |                          |                                          |                         |                         |                                              |                        |            |                         |                                              |            |                         |                                               |                         |                   |                  |                                            |   |            |            |                        |                                             |                        |           |                      |                                           |            |                         |                                             |  |
| <b>PROBLEM</b>                                                                                                                                                                                                                                                                                                               | <p><b>Is the problem a priority?</b></p> <p> <input type="radio"/> No<br/> <input checked="" type="radio"/> Probably no<br/> <input type="radio"/> Probably yes<br/> <input type="radio"/> Yes<br/> <hr/> <input type="radio"/> Varies<br/> <input type="radio"/> Don't know                 </p>                                                                                                                                                                                                                                                                                     | <p>It is important to avoid ventilation-related lung injuries, which may lead to prolonged ventilation or an increased mortality rate, in patients with ARDS, by using proper ventilation strategies<sup>1</sup>. The mortality rate due to ARDS is still high, despite enormous efforts and multiple studies to define lung protective strategies<sup>2,3</sup>.</p> <p>HFO is an artificial ventilation mode, which can restrict the ventilation tidal volume as well as provide a lung recruitment effect<sup>4</sup>. HFO has been recognized to provide lung protection, however, it is still not commonly used in adult intensive care<sup>5</sup>. Further studies are necessary to determine its effectiveness and safety. However, we conclude that this should not be prioritized to be resolved at the present time.</p>                                                                                                                                                                                                                                                                                                                                                                                                                                                                                                                                                        |                                             |                                               |                           |                                                     |                                            |                                          |                          |                                          |                         |                         |                                              |                        |            |                         |                                              |            |                         |                                               |                         |                   |                  |                                            |   |            |            |                        |                                             |                        |           |                      |                                           |            |                         |                                             |  |
|                                                                                                                                                                                                                                                                                                                              | <p><b>What is the overall certainty of the evidence of effects?</b></p> <p> <input checked="" type="radio"/> Very low<br/> <input type="radio"/> Low<br/> <input type="radio"/> Moderate<br/> <input type="radio"/> High<br/> <hr/> <input type="radio"/> No included studies                 </p>                                                                                                                                                                                                                                                                                    | <p><b>The relative importance or values of the main outcomes of interest:</b></p> <table border="1"> <thead> <tr> <th>Outcomes</th> <th>Relative importance</th> <th>Certainty of the evidence (GRADE)</th> </tr> </thead> <tbody> <tr> <td>Short term mortality<sup>(note 1)</sup></td> <td>CRITICAL</td> <td>⊕○○○<br/>VERY LOW</td> </tr> <tr> <td>VFD<sup>(note 2)</sup></td> <td>CRITICAL</td> <td>⊕⊕○○<br/>LOW</td> </tr> <tr> <td>Barotrauma</td> <td>CRITICAL</td> <td>⊕○○○<br/>VERY LOW</td> </tr> </tbody> </table>                                                                                                                                                                                                                                                                                                                                                                                                                                                                                                                                                                                                                                                                                                                                                                                                                                                               |                                             |                                               | Outcomes                  | Relative importance                                 | Certainty of the evidence (GRADE)          | Short term mortality <sup>(note 1)</sup> | CRITICAL                 | ⊕○○○<br>VERY LOW                         | VFD <sup>(note 2)</sup> | CRITICAL                | ⊕⊕○○<br>LOW                                  | Barotrauma             | CRITICAL   | ⊕○○○<br>VERY LOW        |                                              |            |                         |                                               |                         |                   |                  |                                            |   |            |            |                        |                                             |                        |           |                      |                                           |            |                         |                                             |  |
| Outcomes                                                                                                                                                                                                                                                                                                                     | Relative importance                                                                                                                                                                                                                                                                                                                                                                                                                                                                                                                                                                   | Certainty of the evidence (GRADE)                                                                                                                                                                                                                                                                                                                                                                                                                                                                                                                                                                                                                                                                                                                                                                                                                                                                                                                                                                                                                                                                                                                                                                                                                                                                                                                                                          |                                             |                                               |                           |                                                     |                                            |                                          |                          |                                          |                         |                         |                                              |                        |            |                         |                                              |            |                         |                                               |                         |                   |                  |                                            |   |            |            |                        |                                             |                        |           |                      |                                           |            |                         |                                             |  |
| Short term mortality <sup>(note 1)</sup>                                                                                                                                                                                                                                                                                     | CRITICAL                                                                                                                                                                                                                                                                                                                                                                                                                                                                                                                                                                              | ⊕○○○<br>VERY LOW                                                                                                                                                                                                                                                                                                                                                                                                                                                                                                                                                                                                                                                                                                                                                                                                                                                                                                                                                                                                                                                                                                                                                                                                                                                                                                                                                                           |                                             |                                               |                           |                                                     |                                            |                                          |                          |                                          |                         |                         |                                              |                        |            |                         |                                              |            |                         |                                               |                         |                   |                  |                                            |   |            |            |                        |                                             |                        |           |                      |                                           |            |                         |                                             |  |
| VFD <sup>(note 2)</sup>                                                                                                                                                                                                                                                                                                      | CRITICAL                                                                                                                                                                                                                                                                                                                                                                                                                                                                                                                                                                              | ⊕⊕○○<br>LOW                                                                                                                                                                                                                                                                                                                                                                                                                                                                                                                                                                                                                                                                                                                                                                                                                                                                                                                                                                                                                                                                                                                                                                                                                                                                                                                                                                                |                                             |                                               |                           |                                                     |                                            |                                          |                          |                                          |                         |                         |                                              |                        |            |                         |                                              |            |                         |                                               |                         |                   |                  |                                            |   |            |            |                        |                                             |                        |           |                      |                                           |            |                         |                                             |  |
| Barotrauma                                                                                                                                                                                                                                                                                                                   | CRITICAL                                                                                                                                                                                                                                                                                                                                                                                                                                                                                                                                                                              | ⊕○○○<br>VERY LOW                                                                                                                                                                                                                                                                                                                                                                                                                                                                                                                                                                                                                                                                                                                                                                                                                                                                                                                                                                                                                                                                                                                                                                                                                                                                                                                                                                           |                                             |                                               |                           |                                                     |                                            |                                          |                          |                                          |                         |                         |                                              |                        |            |                         |                                              |            |                         |                                               |                         |                   |                  |                                            |   |            |            |                        |                                             |                        |           |                      |                                           |            |                         |                                             |  |
| <b>DESIRABLE AND UNDESIRABLE EFFECTS</b>                                                                                                                                                                                                                                                                                     | <p><b>Is there important uncertainty about or variability in how much people value the main outcomes?</b></p> <p> <input type="radio"/> Important uncertainty or variability<br/> <input checked="" type="radio"/> Possibly important uncertainty or variability<br/> <input type="radio"/> Possibly no important<br/> <input type="radio"/> uncertainty or variability<br/> <input type="radio"/> No important uncertainty or variability<br/> <hr/> <input type="radio"/> No known undesirable outcomes                 </p>                                                        | <p><b>Summary of findings:</b></p> <table border="1"> <thead> <tr> <th>Outcomes</th> <th>Risk with Conventional Mechanical Ventilation (CMV)</th> <th>Risk with High Frequency Oscillation (HFO)</th> <th>Absolute (95% CI)</th> <th>Relative effect (95% CI)</th> </tr> </thead> <tbody> <tr> <td rowspan="3">Short term mortality<sup>(note 1)</sup></td> <td>398 / 1000</td> <td>418 / 1000 (326 to 541)</td> <td>20 more per 1000 (from 72 fewer to 143 more)</td> <td rowspan="3">RR 1.05 (0.82 to 1.36)</td> </tr> <tr> <td>352 / 1000</td> <td>370 / 1000 (338 to 560)</td> <td>18 more per 1000 (from 63 fewer to 127 more)</td> </tr> <tr> <td>412 / 1000</td> <td>433 / 1000 (358 to 644)</td> <td>21 fewer per 1000 (from 74 fewer to 148 more)</td> </tr> <tr> <td>VFD<sup>(note 2)</sup></td> <td>Average 17.6 days</td> <td>Average 17.3 day</td> <td>MD 0.3 day fewer (1.23 fewer to 0.64 more)</td> <td>-</td> </tr> <tr> <td rowspan="3">Barotrauma</td> <td>119 / 1000</td> <td>144 / 1000 (99 to 209)</td> <td>25 more per 1000 (from 20 fewer to 90 more)</td> <td rowspan="3">RR 1.21 (0.83 to 1.76)</td> </tr> <tr> <td>42 / 1000</td> <td>51 / 1000 (35 to 74)</td> <td>9 more per 1000 (from 7 fewer to 32 more)</td> </tr> <tr> <td>125 / 1000</td> <td>151 / 1000 (104 to 220)</td> <td>26 more per 1000 (from 21 fewer to 95 more)</td> </tr> </tbody> </table> |                                             |                                               | Outcomes                  | Risk with Conventional Mechanical Ventilation (CMV) | Risk with High Frequency Oscillation (HFO) | Absolute (95% CI)                        | Relative effect (95% CI) | Short term mortality <sup>(note 1)</sup> | 398 / 1000              | 418 / 1000 (326 to 541) | 20 more per 1000 (from 72 fewer to 143 more) | RR 1.05 (0.82 to 1.36) | 352 / 1000 | 370 / 1000 (338 to 560) | 18 more per 1000 (from 63 fewer to 127 more) | 412 / 1000 | 433 / 1000 (358 to 644) | 21 fewer per 1000 (from 74 fewer to 148 more) | VFD <sup>(note 2)</sup> | Average 17.6 days | Average 17.3 day | MD 0.3 day fewer (1.23 fewer to 0.64 more) | - | Barotrauma | 119 / 1000 | 144 / 1000 (99 to 209) | 25 more per 1000 (from 20 fewer to 90 more) | RR 1.21 (0.83 to 1.76) | 42 / 1000 | 51 / 1000 (35 to 74) | 9 more per 1000 (from 7 fewer to 32 more) | 125 / 1000 | 151 / 1000 (104 to 220) | 26 more per 1000 (from 21 fewer to 95 more) |  |
|                                                                                                                                                                                                                                                                                                                              | Outcomes                                                                                                                                                                                                                                                                                                                                                                                                                                                                                                                                                                              | Risk with Conventional Mechanical Ventilation (CMV)                                                                                                                                                                                                                                                                                                                                                                                                                                                                                                                                                                                                                                                                                                                                                                                                                                                                                                                                                                                                                                                                                                                                                                                                                                                                                                                                        | Risk with High Frequency Oscillation (HFO)  | Absolute (95% CI)                             | Relative effect (95% CI)  |                                                     |                                            |                                          |                          |                                          |                         |                         |                                              |                        |            |                         |                                              |            |                         |                                               |                         |                   |                  |                                            |   |            |            |                        |                                             |                        |           |                      |                                           |            |                         |                                             |  |
|                                                                                                                                                                                                                                                                                                                              | Short term mortality <sup>(note 1)</sup>                                                                                                                                                                                                                                                                                                                                                                                                                                                                                                                                              | 398 / 1000                                                                                                                                                                                                                                                                                                                                                                                                                                                                                                                                                                                                                                                                                                                                                                                                                                                                                                                                                                                                                                                                                                                                                                                                                                                                                                                                                                                 | 418 / 1000 (326 to 541)                     | 20 more per 1000 (from 72 fewer to 143 more)  | RR 1.05 (0.82 to 1.36)    |                                                     |                                            |                                          |                          |                                          |                         |                         |                                              |                        |            |                         |                                              |            |                         |                                               |                         |                   |                  |                                            |   |            |            |                        |                                             |                        |           |                      |                                           |            |                         |                                             |  |
|                                                                                                                                                                                                                                                                                                                              |                                                                                                                                                                                                                                                                                                                                                                                                                                                                                                                                                                                       | 352 / 1000                                                                                                                                                                                                                                                                                                                                                                                                                                                                                                                                                                                                                                                                                                                                                                                                                                                                                                                                                                                                                                                                                                                                                                                                                                                                                                                                                                                 | 370 / 1000 (338 to 560)                     | 18 more per 1000 (from 63 fewer to 127 more)  |                           |                                                     |                                            |                                          |                          |                                          |                         |                         |                                              |                        |            |                         |                                              |            |                         |                                               |                         |                   |                  |                                            |   |            |            |                        |                                             |                        |           |                      |                                           |            |                         |                                             |  |
|                                                                                                                                                                                                                                                                                                                              |                                                                                                                                                                                                                                                                                                                                                                                                                                                                                                                                                                                       | 412 / 1000                                                                                                                                                                                                                                                                                                                                                                                                                                                                                                                                                                                                                                                                                                                                                                                                                                                                                                                                                                                                                                                                                                                                                                                                                                                                                                                                                                                 | 433 / 1000 (358 to 644)                     | 21 fewer per 1000 (from 74 fewer to 148 more) |                           |                                                     |                                            |                                          |                          |                                          |                         |                         |                                              |                        |            |                         |                                              |            |                         |                                               |                         |                   |                  |                                            |   |            |            |                        |                                             |                        |           |                      |                                           |            |                         |                                             |  |
| VFD <sup>(note 2)</sup>                                                                                                                                                                                                                                                                                                      | Average 17.6 days                                                                                                                                                                                                                                                                                                                                                                                                                                                                                                                                                                     | Average 17.3 day                                                                                                                                                                                                                                                                                                                                                                                                                                                                                                                                                                                                                                                                                                                                                                                                                                                                                                                                                                                                                                                                                                                                                                                                                                                                                                                                                                           | MD 0.3 day fewer (1.23 fewer to 0.64 more)  | -                                             |                           |                                                     |                                            |                                          |                          |                                          |                         |                         |                                              |                        |            |                         |                                              |            |                         |                                               |                         |                   |                  |                                            |   |            |            |                        |                                             |                        |           |                      |                                           |            |                         |                                             |  |
| Barotrauma                                                                                                                                                                                                                                                                                                                   | 119 / 1000                                                                                                                                                                                                                                                                                                                                                                                                                                                                                                                                                                            | 144 / 1000 (99 to 209)                                                                                                                                                                                                                                                                                                                                                                                                                                                                                                                                                                                                                                                                                                                                                                                                                                                                                                                                                                                                                                                                                                                                                                                                                                                                                                                                                                     | 25 more per 1000 (from 20 fewer to 90 more) | RR 1.21 (0.83 to 1.76)                        |                           |                                                     |                                            |                                          |                          |                                          |                         |                         |                                              |                        |            |                         |                                              |            |                         |                                               |                         |                   |                  |                                            |   |            |            |                        |                                             |                        |           |                      |                                           |            |                         |                                             |  |
|                                                                                                                                                                                                                                                                                                                              | 42 / 1000                                                                                                                                                                                                                                                                                                                                                                                                                                                                                                                                                                             | 51 / 1000 (35 to 74)                                                                                                                                                                                                                                                                                                                                                                                                                                                                                                                                                                                                                                                                                                                                                                                                                                                                                                                                                                                                                                                                                                                                                                                                                                                                                                                                                                       | 9 more per 1000 (from 7 fewer to 32 more)   |                                               |                           |                                                     |                                            |                                          |                          |                                          |                         |                         |                                              |                        |            |                         |                                              |            |                         |                                               |                         |                   |                  |                                            |   |            |            |                        |                                             |                        |           |                      |                                           |            |                         |                                             |  |
|                                                                                                                                                                                                                                                                                                                              | 125 / 1000                                                                                                                                                                                                                                                                                                                                                                                                                                                                                                                                                                            | 151 / 1000 (104 to 220)                                                                                                                                                                                                                                                                                                                                                                                                                                                                                                                                                                                                                                                                                                                                                                                                                                                                                                                                                                                                                                                                                                                                                                                                                                                                                                                                                                    | 26 more per 1000 (from 21 fewer to 95 more) |                                               |                           |                                                     |                                            |                                          |                          |                                          |                         |                         |                                              |                        |            |                         |                                              |            |                         |                                               |                         |                   |                  |                                            |   |            |            |                        |                                             |                        |           |                      |                                           |            |                         |                                             |  |
| <p><b>How substantial are the desirable anticipated effects?</b></p> <p> <input type="radio"/> Trivial<br/> <input checked="" type="radio"/> Small<br/> <input type="radio"/> Moderate<br/> <input type="radio"/> Large<br/> <hr/> <input type="radio"/> Varies<br/> <input type="radio"/> Don't know                 </p>   |                                                                                                                                                                                                                                                                                                                                                                                                                                                                                                                                                                                       |                                                                                                                                                                                                                                                                                                                                                                                                                                                                                                                                                                                                                                                                                                                                                                                                                                                                                                                                                                                                                                                                                                                                                                                                                                                                                                                                                                                            |                                             |                                               |                           |                                                     |                                            |                                          |                          |                                          |                         |                         |                                              |                        |            |                         |                                              |            |                         |                                               |                         |                   |                  |                                            |   |            |            |                        |                                             |                        |           |                      |                                           |            |                         |                                             |  |
| <p><b>How substantial are the undesirable anticipated effects?</b></p> <p> <input type="radio"/> Large<br/> <input checked="" type="radio"/> Moderate<br/> <input type="radio"/> Small<br/> <input type="radio"/> Trivial<br/> <hr/> <input type="radio"/> Varies<br/> <input type="radio"/> Don't know                 </p> |                                                                                                                                                                                                                                                                                                                                                                                                                                                                                                                                                                                       |                                                                                                                                                                                                                                                                                                                                                                                                                                                                                                                                                                                                                                                                                                                                                                                                                                                                                                                                                                                                                                                                                                                                                                                                                                                                                                                                                                                            |                                             |                                               |                           |                                                     |                                            |                                          |                          |                                          |                         |                         |                                              |                        |            |                         |                                              |            |                         |                                               |                         |                   |                  |                                            |   |            |            |                        |                                             |                        |           |                      |                                           |            |                         |                                             |  |
| <p><b>Does the balance between desirable and undesirable effects favor the intervention or the comparison?</b></p> <p> <input type="radio"/> Favors the comparison<br/> <input checked="" type="radio"/> Probably favors the comparison<br/> <input type="radio"/> Does not                 </p>                             | <p><b>Summary:</b> Four randomized controlled trials (RCT) were found for evaluating HFO in adult patients with ARDS. There was no statistically significant difference in mortality rate and ventilation free days (VFD) by utilizing HFO; mortality rate (Relative Risk (RR): 1.05, 95% Confidence Interval (CI): 0.82 - 1.36) and VFD (mean difference: -0.30 days, 95%CI: -1.23 - 0.64). Although there is no statistically significant difference, the results show an increasing trend in the incidence of barotrauma in patients treated with HFO (RR: 1.21, 95%CI: 0.83 -</p> |                                                                                                                                                                                                                                                                                                                                                                                                                                                                                                                                                                                                                                                                                                                                                                                                                                                                                                                                                                                                                                                                                                                                                                                                                                                                                                                                                                                            |                                             |                                               |                           |                                                     |                                            |                                          |                          |                                          |                         |                         |                                              |                        |            |                         |                                              |            |                         |                                               |                         |                   |                  |                                            |   |            |            |                        |                                             |                        |           |                      |                                           |            |                         |                                             |  |

|                    |                                                                                                         |                                                                                                                                                                                                                                                                                                                                                                                                                               |                                                                                                                                                                                                                                                                                                  |  |
|--------------------|---------------------------------------------------------------------------------------------------------|-------------------------------------------------------------------------------------------------------------------------------------------------------------------------------------------------------------------------------------------------------------------------------------------------------------------------------------------------------------------------------------------------------------------------------|--------------------------------------------------------------------------------------------------------------------------------------------------------------------------------------------------------------------------------------------------------------------------------------------------|--|
|                    |                                                                                                         | <p>favor either the intervention or the comparison</p> <p><input type="radio"/> Probably favors the intervention</p> <p><input type="radio"/> Favors the intervention</p> <hr/> <p><input type="radio"/> Varies</p> <p><input type="radio"/> Don't know</p>                                                                                                                                                                   | 1.36).                                                                                                                                                                                                                                                                                           |  |
| RESOURCES REQUIRED | <p><b>How large are the resource requirements (costs)?</b></p>                                          | <p><input checked="" type="radio"/> Large costs</p> <p><input type="radio"/> Moderate costs</p> <p><input type="radio"/> Negligible costs and savings</p> <p><input type="radio"/> Moderate savings</p> <p><input type="radio"/> Large savings</p> <hr/> <p><input type="radio"/> Varies</p> <p><input type="radio"/> Don't know</p>                                                                                          | <p>In order to use HFO, a dedicated ventilator is needed (approximately 10 million yen). There is no additional cost if the facility already has access to HFO. Since HFO is not commonly used in adults in Japan, few facilities have the equipment, and the cost for introduction is high.</p> |  |
|                    | <p><b>Does the cost-effectiveness of the intervention favor the intervention or the comparison?</b></p> | <p><input type="radio"/> Favors the comparison</p> <p><input checked="" type="radio"/> Probably favors the comparison</p> <p><input type="radio"/> Does not favor either the intervention or the comparison</p> <p><input type="radio"/> Probably favors the intervention</p> <p><input type="radio"/> Favors the intervention</p> <hr/> <p><input type="radio"/> Varies</p> <p><input type="radio"/> No included studies</p> | <p>The overall benefit for patients by introducing HFO is likely not to be great, based on the results of this review. Furthermore, the estimated cost increase likely exceeds the potential benefits except in facilities which already have access to HFO.</p>                                 |  |
| EQUITY             | <p><b>What would be the impact on health equity?</b></p>                                                | <p><input type="radio"/> Reduced</p> <p><input checked="" type="radio"/> Probably reduced</p> <p><input type="radio"/> Probably no impact</p> <p><input type="radio"/> Probably increased</p> <p><input type="radio"/> Increased</p> <hr/> <p><input type="radio"/> Varies</p> <p><input type="radio"/> Don't know</p>                                                                                                        | <p>Inequity on whether facilities can have an HFO dedicated ventilator may occur.</p>                                                                                                                                                                                                            |  |
| ACCEPTABILITY      | <p><b>Is the intervention acceptable to key stakeholders?</b></p>                                       | <p><input type="radio"/> No</p> <p><input checked="" type="radio"/> Probably no</p> <p><input type="radio"/> Probably yes</p> <p><input type="radio"/> Yes</p> <hr/> <p><input type="radio"/> Varies</p> <p><input type="radio"/> Don't know</p>                                                                                                                                                                              | <p>In facilities that must acquire an expensive HFO dedicated ventilator, since there are few obvious benefits, acceptance is expected to be difficult. Educating staff in the appropriate use in each department is also labor intensive, and adds to the difficulty of acceptance.</p>         |  |
| FEASIBILITY        | <p><b>Is the intervention feasible implement?</b></p>                                                   | <p><input type="radio"/> No</p> <p><input type="radio"/> Probably no</p> <p><input type="radio"/> Probably yes</p> <p><input type="radio"/> Yes</p> <hr/> <p><input checked="" type="radio"/> Varies</p> <p><input type="radio"/> Don't know</p>                                                                                                                                                                              | <p>The intervention of this CQ is an artificial ventilation mode, but adaptation to the patient is feasible. It is necessary to acquire an expensive dedicated ventilator in order to use HFO.</p>                                                                                               |  |





## Recommendation

### CQ8 : Should High Frequency Oscillation be used in adult patients with ARDS?

| Balance of consequences | Undesirable consequences clearly outweigh desirable consequences in most settings | Undesirable consequences probably outweigh desirable consequences in most settings | The balance between desirable and undesirable consequences is closely balanced or uncertain | Desirable consequences probably outweigh undesirable consequences in most settings | Desirable consequences clearly outweigh undesirable consequences in most settings |
|-------------------------|-----------------------------------------------------------------------------------|------------------------------------------------------------------------------------|---------------------------------------------------------------------------------------------|------------------------------------------------------------------------------------|-----------------------------------------------------------------------------------|
| Judgement               | ○                                                                                 | ○                                                                                  | ●                                                                                           | ○                                                                                  | ○                                                                                 |

| Type of recommendation | Strong recommendation against the intervention | Conditional recommendation against the intervention | Conditional recommendation for either the intervention or the comparison | Conditional recommendation for the intervention |
|------------------------|------------------------------------------------|-----------------------------------------------------|--------------------------------------------------------------------------|-------------------------------------------------|
| Judgement              | ○                                              | ●                                                   | ○                                                                        | ○                                               |

|                |                                                                                                                                                                                              |
|----------------|----------------------------------------------------------------------------------------------------------------------------------------------------------------------------------------------|
| Recommendation | <b>We suggest against the use of High Frequency Oscillation (HFO) in adult patients with ARDS. (GRADE 2C, Strength of recommendation “weak recommendation” / Quality of evidence: “low”)</b> |
|----------------|----------------------------------------------------------------------------------------------------------------------------------------------------------------------------------------------|

|               |                                                                                                                                                                                                                                                                                                                                                                                                                                                                                                                                                                                                                                                                                                                                                                                                                                                                                                                                                                                                                                                                                                                                                                                                                                                                                                                                                                                                                                                                                                                                                                                                                                                                                                                                                                                                                                                                                                                                                                                                                                                                                                                                                                                                                                                                                                                                                                                                                                                                                                                                                                                                                                                                                                                                                                                                                                                                                                                                                                                                                                                                                                                                                                                                                                                                                                                                                                                                                                                                                                                                                                                             |
|---------------|---------------------------------------------------------------------------------------------------------------------------------------------------------------------------------------------------------------------------------------------------------------------------------------------------------------------------------------------------------------------------------------------------------------------------------------------------------------------------------------------------------------------------------------------------------------------------------------------------------------------------------------------------------------------------------------------------------------------------------------------------------------------------------------------------------------------------------------------------------------------------------------------------------------------------------------------------------------------------------------------------------------------------------------------------------------------------------------------------------------------------------------------------------------------------------------------------------------------------------------------------------------------------------------------------------------------------------------------------------------------------------------------------------------------------------------------------------------------------------------------------------------------------------------------------------------------------------------------------------------------------------------------------------------------------------------------------------------------------------------------------------------------------------------------------------------------------------------------------------------------------------------------------------------------------------------------------------------------------------------------------------------------------------------------------------------------------------------------------------------------------------------------------------------------------------------------------------------------------------------------------------------------------------------------------------------------------------------------------------------------------------------------------------------------------------------------------------------------------------------------------------------------------------------------------------------------------------------------------------------------------------------------------------------------------------------------------------------------------------------------------------------------------------------------------------------------------------------------------------------------------------------------------------------------------------------------------------------------------------------------------------------------------------------------------------------------------------------------------------------------------------------------------------------------------------------------------------------------------------------------------------------------------------------------------------------------------------------------------------------------------------------------------------------------------------------------------------------------------------------------------------------------------------------------------------------------------------------------|
| Justification | <p><b>Question:</b> Should high frequency oscillation be used in adult patients with ARDS?</p> <p><b>Patients:</b> Adult patients anticipated to require long-term mechanical ventilation</p> <p><b>Interventions:</b> High Frequency Oscillation (HFO)</p> <p><b>Comparison:</b> Conventional Mechanical Ventilation (CMV)</p> <p><b>Outcomes:</b> Short-term mortality <sup>(note 1)</sup>, VFD <sup>(note 2)</sup>, Barotrauma</p> <p><b>Summary of the evidence:</b> Four randomized controlled trials (RCT) were found for evaluating HFO in adult patients with ARDS. There was no statistically significant difference in mortality rate and ventilation free days (VFD) by utilizing HFO; mortality rate (Relative Risk (RR): 1.05, 95% Confidence Interval (CI): 0.82 - 1.36) and VFD (mean difference: -0.30 days, 95%CI: -1.23 - 0.64). Although there is no statistically significant difference, the results show an increasing trend in the incidence of barotrauma in patients treated with HFO (RR: 1.21, 95%CI: 0.83 - 1.36).</p> <p><b>Quality of the evidence:</b> Studies which use ventilation settings as an intervention cannot be performed in a double blinded manner, and the selected studies were no exceptions. The high likelihood of critical selection biases were estimated for all selected studies. One study was conducted with an intent-to-treat-analysis, however, a cross-over RCT was used as the design (6). One study did not provide a patient flow diagram which can be important to decide the quality of the study (7). The other two studies excluded more than half of the initial participants without a clear description of selection criteria in the manuscript (8, 9). Heterogeneity among studies can be high with I2 statistics of 69%. Indirectness in the four selected studies was not sufficiently obvious to lower the evidence grade, given other factors. Precision was considered to be low given the wide 95%CIs, although the number of included cases seemed adequate. Due to the small number of studies selected, publication bias could not be examined. In conclusion, the overall quality of evidence was concluded as low. This included very low for mortality, low for VFD, and very low for barotrauma, respectively.</p> <p><b>Judgement of benefit and harm, resources and cost:</b> Given that most available ventilators cannot provide a HFO mode, in order to introduce HFO as a new modality, a facility needs to invest a large amount of money. Benefits are estimated to be relatively small even with increased spending, considering the results of this review. Although there was an increasing tendency for the development of barotrauma in the HFO group, no statistically significant difference could be seen, hence, the potential for harm secondary to HFO is concluded as low.</p> <p><b>Recommendations:</b> We suggest against the use of High Frequency Oscillation (HFO) in adult patients with ARDS. (GRADE 2C, Strength of recommendation “weak recommendation” / Quality of evidence: “low”)</p> <p><b>Additional considerations:</b> We emphasize that this recommendation is for adult patients. HFO for adult patients with ARDS is not commonly used in current practice as compared to pediatric patients or neonates. HFO can be harmful if applied improperly. However, when used correctly, it can provide better outcomes with fewer complications.</p> <p>In the panel meeting, a vote was conducted because of inability to achieve consensus. As a result, it was</p> |
|---------------|---------------------------------------------------------------------------------------------------------------------------------------------------------------------------------------------------------------------------------------------------------------------------------------------------------------------------------------------------------------------------------------------------------------------------------------------------------------------------------------------------------------------------------------------------------------------------------------------------------------------------------------------------------------------------------------------------------------------------------------------------------------------------------------------------------------------------------------------------------------------------------------------------------------------------------------------------------------------------------------------------------------------------------------------------------------------------------------------------------------------------------------------------------------------------------------------------------------------------------------------------------------------------------------------------------------------------------------------------------------------------------------------------------------------------------------------------------------------------------------------------------------------------------------------------------------------------------------------------------------------------------------------------------------------------------------------------------------------------------------------------------------------------------------------------------------------------------------------------------------------------------------------------------------------------------------------------------------------------------------------------------------------------------------------------------------------------------------------------------------------------------------------------------------------------------------------------------------------------------------------------------------------------------------------------------------------------------------------------------------------------------------------------------------------------------------------------------------------------------------------------------------------------------------------------------------------------------------------------------------------------------------------------------------------------------------------------------------------------------------------------------------------------------------------------------------------------------------------------------------------------------------------------------------------------------------------------------------------------------------------------------------------------------------------------------------------------------------------------------------------------------------------------------------------------------------------------------------------------------------------------------------------------------------------------------------------------------------------------------------------------------------------------------------------------------------------------------------------------------------------------------------------------------------------------------------------------------------------|

|                                                 |                                                                                                                                                                                                                                                                                                                                                                                                                                                                      |
|-------------------------------------------------|----------------------------------------------------------------------------------------------------------------------------------------------------------------------------------------------------------------------------------------------------------------------------------------------------------------------------------------------------------------------------------------------------------------------------------------------------------------------|
|                                                 | proposed not to use HFO (weak recommendation); four answered for “not to recommend” (strong recommendation) and eight voted for “not to propose” (weak recommendation) respectively.                                                                                                                                                                                                                                                                                 |
| <b>Subgroup considerations</b>                  | None                                                                                                                                                                                                                                                                                                                                                                                                                                                                 |
| <b>Implementation considerations</b>            | Since management requiring specialized knowledge and experience with previous ventilator therapy is needed, staff education about how to use and troubleshoot this modality is very important. The high cost, clinical complications (pneumothorax, obstruction) and several complicated issues in HFO settings (target of mean airway pressure, carbon dioxide management, cuff leak management, selection of the proper frequency, etc. ) must also be considered. |
| <b>Monitoring and evaluation considerations</b> | Standard monitoring for oxygenation status, ventilation, and work of breathing are sufficient. It is not feasible to examine ventilation using tidal ventilation volume, end-tidal CO <sub>2</sub> , or lung sounds in patients receiving HFO, thus alternative monitoring is necessary.                                                                                                                                                                             |
| <b>Research possibilities</b>                   | Two of the selected studies(10, 11) adopted a P/F ratio ≤ 200 as the inclusion criteria, therefore, a significant number of patients with moderate ARDS are included, which might lead to dilute the effects of HFO. The effect of HFO in the patients with severe ARDS, which is unable to be managed with a conventional lung protective strategies, should be evaluated in the future studies.                                                                    |

Note 1) Short time mortality is defined as death at the end of the study.

Note 2) Count days off ventilator (until day 28), for subjects who die, ventilator free days equals 0.

## References

1. Esteban A, Ferguson ND, Meade MO, et al. Evolution of mechanical ventilation in response to clinical research. *Am J Respir Crit Care Med* 177 (2): 170-7, 2008. PMID 17962636
2. ARDS Network. Ventilation with lower tidal volumes as compared with traditional tidal volumes for acute lung injury and the acute respiratory distress syndrome. The Acute Respiratory Distress Syndrome Network. *N Engl J Med* 342 (18): 1301-8, 2000. PMID 10793162
3. Phua J, Badia JR, Adhikari NK, et al. Has mortality from acute respiratory distress syndrome decreased over time?: A systematic review. *Am J Respir Crit Care Med* 179 (3): 220-7, 2009. PMID 19011152
4. Rimensberger PC. ICU cornerstone: high frequency ventilation is here to stay. *Crit Care* 7 (5): 342-4, 2003. PMID 12974963
5. Ferguson ND, Slutsky AS. Point: High-frequency ventilation is the optimal physiological approach to ventilate ARDS patients. *J Appl Physiol* (1985) 104 (4): 1230-1, 2008. PMID 18048584
6. Derdak S, Mehta S, Stewart TE, et al. High-frequency oscillatory ventilation for acute respiratory distress syndrome in adults: a randomized, controlled trial. *Am J Respir Crit Care Med* 166 (6): 801-8, 2002. PMID 12231488
7. Bollen CW, van Well GT, Sherry T, et al. High frequency oscillatory ventilation compared with conventional mechanical ventilation in adult respiratory distress syndrome: a randomized controlled trial [ISRCTN24242669]. *Crit Care* 9 (4): R430-9, 2005. PMID 16137357
8. Claesson J, Freundlich M, Gunnarsson I, et al. Scandinavian clinical practice guideline on mechanical ventilation in adults with the acute respiratory distress syndrome. *Acta Anaesthesiol Scand* 59 (3): 286-97, 2015. PMID 25524779
9. Sud S, Sud M, Friedrich JO, et al. High-frequency ventilation versus conventional ventilation for treatment of acute lung injury and acute respiratory distress syndrome. *Cochrane Database Syst Rev* 2 : CD004085, 2013. PMID 23450549
10. Young D, Lamb SE, Shah S, et al. High-frequency oscillation for acute respiratory distress syndrome. *N Engl J Med* 368 (9): 806-13, 2013. PMID 23339638
11. Ferguson ND, Cook DJ, Guyatt GH, et al. High-frequency oscillation in early acute respiratory distress syndrome. *N Engl J Med* 368 (9): 795-805, 2013. PMID 23339639

## CQ09. Study flow diagram

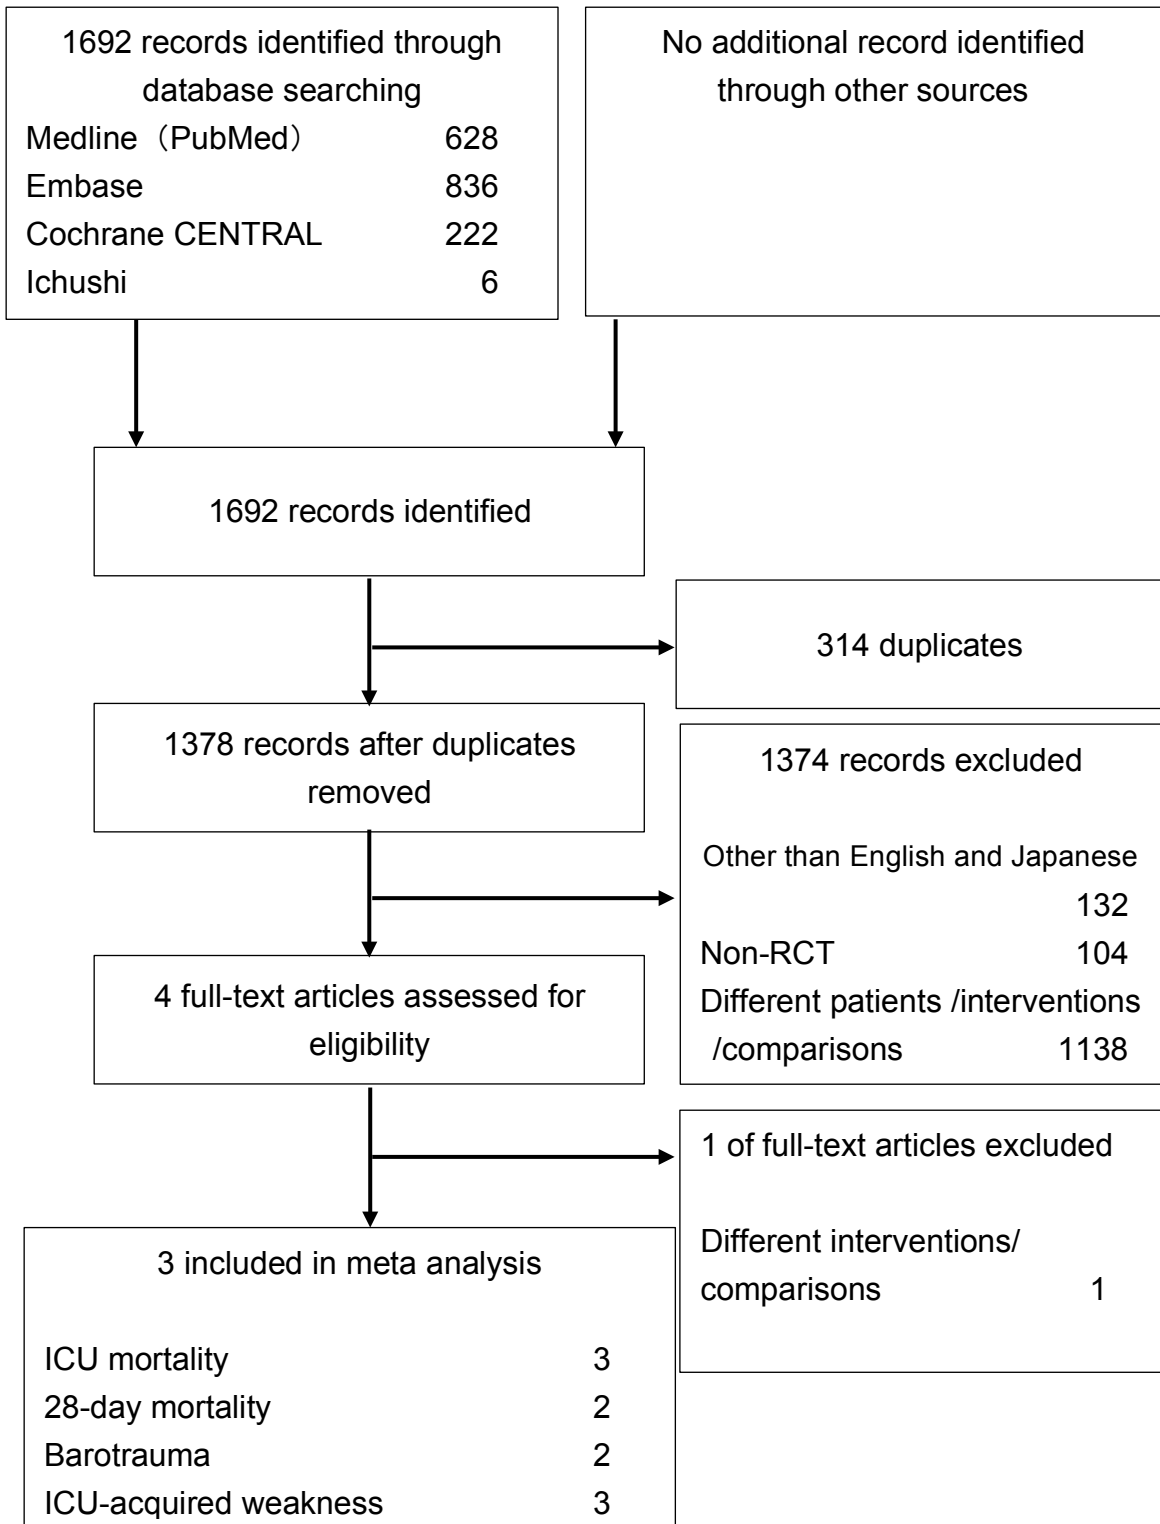

| Outcome                                   |                               | ICU mortality                                                |                                                              | risk of bias                                     |                        | not serious (0)                                         |                                              |                                   |                                              |
|-------------------------------------------|-------------------------------|--------------------------------------------------------------|--------------------------------------------------------------|--------------------------------------------------|------------------------|---------------------------------------------------------|----------------------------------------------|-----------------------------------|----------------------------------------------|
| 番号                                        | 著者名 発表年<br>(Forest plot表示)    | risk of bias評価                                               |                                                              |                                                  |                        |                                                         |                                              |                                   |                                              |
|                                           |                               | ランダム割付順番の生成<br>random sequence generation                    | 割り付けの隠蔽化<br>allocation concealment                           | ブラインド<br>blinding                                |                        | 不完全なアウトカムデータ<br>incomplete outcome data                 | 選択されたアウトカムの報告<br>selective outcome reporting | その他のバイアス<br>Other sources of bias | 研究内でのバイアスのリスク<br>Risk of bias within a study |
| 研究参加者と治療提供者<br>participants and personnel | アウトカム評価者<br>outcome assessors |                                                              |                                                              |                                                  |                        |                                                         |                                              |                                   |                                              |
| 1                                         | Forel 2006                    | Unclear risk                                                 | Low risk                                                     | High risk                                        | Low risk               | Low risk                                                | Low risk                                     | Low risk                          | Low risk                                     |
| 2                                         | Gainnier 2004                 | Unclear risk                                                 | Low risk                                                     | High risk                                        | Low risk               | Low risk                                                | Low risk                                     | Low risk                          | Low risk                                     |
| 3                                         | Papazian 2010                 | Low risk                                                     | Low risk                                                     | Low risk                                         | Low risk               | Low risk                                                | Low risk                                     | Low risk                          | Low risk                                     |
|                                           |                               |                                                              |                                                              |                                                  |                        |                                                         |                                              |                                   |                                              |
| 番号                                        | 著者名 発表年<br>(Forest plot表示)    | risk of biasコメント                                             |                                                              |                                                  |                        |                                                         |                                              |                                   |                                              |
| 1                                         | Forel 2006                    | ランダム化の方法が未記載                                                 | ランダム化は変動サイズブロックで等数になるように割り付けられた。研究者には割り付けを知らされていなかった。        | 担当看護師は筋弛緩薬の割り付けかどうかを知っていた。                       | 研究者には割り付けを知らされていなかった。  | 100%フォローされた                                             | 100%報告された                                    | 研究の中断なし                           | 全項目ほぼLow risk                                |
| 2                                         | Gainnier 2004                 | ランダム化の方法が未記載                                                 | 研究者たちは全員、割り付けやブロックサイズを知らされていなかった。                            | 担当看護師は盲検化されておらず、適切な筋弛緩が得られるまでプロトコルに基づいた流量調整を行った。 | 研究者には割り付けを知らされていなかった。  | 100%フォローされた                                             | 100%報告された                                    | 研究の中断なし                           | 全項目ほぼLow risk                                |
| 3                                         | Papazian 2010                 | 本研究は独立した機関によってデータと安全性を監視された。ランダム化と盲検化はCONSORTガイドラインに準じて行われた。 | 本研究は独立した機関によってデータと安全性を監視された。ランダム化と盲検化はCONSORTガイドラインに準じて行われた。 | 多施設共同ランダム化プラセボ対照二重盲検試験                           | 多施設共同ランダム化プラセボ対照二重盲検試験 | 99.7% (339/340)フォローされた。筋弛緩剤の1名は治療開始前に同意撤回したため、解析から除外した。 | 100%報告された                                    | 研究の中断なし                           | 全項目ともLow risk                                |

CQ09  
Risk of bias table, 28-day mortality

| 28-day mortality                                             |                                                              | risk of bias                                     |                               | not serious (0)                                         |                                              |                                   |                                              |
|--------------------------------------------------------------|--------------------------------------------------------------|--------------------------------------------------|-------------------------------|---------------------------------------------------------|----------------------------------------------|-----------------------------------|----------------------------------------------|
| risk of bias評価                                               |                                                              |                                                  |                               |                                                         |                                              |                                   |                                              |
| ランダム割付順番の生成<br>random sequence generation                    | 割り付けの隠蔽化<br>allocation concealment                           | ブラインド<br>blinding                                |                               | 不完全なアウトカムデータ<br>incomplete outcome data                 | 選択されたアウトカムの報告<br>selective outcome reporting | その他のバイアス<br>Other sources of bias | 研究内でのバイアスのリスク<br>Risk of bias within a study |
|                                                              |                                                              | 研究参加者と治療提供者<br>participants and personnel        | アウトカム評価者<br>outcome assessors |                                                         |                                              |                                   |                                              |
| Unclear risk                                                 | Low risk                                                     | High risk                                        | Low risk                      | Low risk                                                | Low risk                                     | Low risk                          | Low risk                                     |
| Low risk                                                     | Low risk                                                     | Low risk                                         | Low risk                      | Low risk                                                | Low risk                                     | Low risk                          | Low risk                                     |
|                                                              |                                                              |                                                  |                               |                                                         |                                              |                                   |                                              |
| risk of biasコメント                                             |                                                              |                                                  |                               |                                                         |                                              |                                   |                                              |
| ランダム化の方法が未記載                                                 | 研究者たちは全員、割り付けやブロックサイズを知らされていなかった。                            | 担当看護師は盲検化されておらず、適切な筋弛緩が得られるまでプロトコルに基づいた流量調整を行った。 | 研究者には割り付けを知らされていなかった。         | 100%フォローされた                                             | 100%報告された                                    | 研究の中断なし                           | 全項目ほぼLow risk                                |
| 本研究は独立した機関によってデータと安全性を監視された。ランダム化と盲検化はCONSORTガイドラインに準じて行われた。 | 本研究は独立した機関によってデータと安全性を監視された。ランダム化と盲検化はCONSORTガイドラインに準じて行われた。 | 多施設共同ランダム化プラセボ対照二重盲検試験                           | 多施設共同ランダム化プラセボ対照二重盲検試験        | 99.7% (339/340)フォローされた。筋弛緩群の1名は治療開始前に同意撤回したため、解析から除外した。 | 100%報告された                                    | 研究の中断なし                           | 全項目ともLow risk                                |

| Outcome                                   |                               | Barotrauma                                                   |                                                              | risk of bias                                     |                        | not serious (0)                                         |                                              |                                   |                                              |
|-------------------------------------------|-------------------------------|--------------------------------------------------------------|--------------------------------------------------------------|--------------------------------------------------|------------------------|---------------------------------------------------------|----------------------------------------------|-----------------------------------|----------------------------------------------|
| 番号                                        | 著者名 発表年<br>(Forest plot表示)    | risk of bias評価                                               |                                                              |                                                  |                        |                                                         |                                              |                                   |                                              |
|                                           |                               | ランダム割付順序の生成<br>random sequence generation                    | 割り付けの隠蔽化<br>allocation concealment                           | ブラインド<br>blinding                                |                        | 不完全なアウトカムデータ<br>incomplete outcome data                 | 選択されたアウトカムの報告<br>selective outcome reporting | その他のバイアス<br>Other sources of bias | 研究内でのバイアスのリスク<br>Risk of bias within a study |
| 研究参加者と治療提供者<br>participants and personnel | アウトカム評価者<br>outcome assessors |                                                              |                                                              |                                                  |                        |                                                         |                                              |                                   |                                              |
| 2                                         | Gainnier 2004                 | Unclear risk                                                 | Low risk                                                     | High risk                                        | Low risk               | Low risk                                                | Low risk                                     | Low risk                          | Low risk                                     |
| 3                                         | Papazian 2010                 | Low risk                                                     | Low risk                                                     | Low risk                                         | Low risk               | Low risk                                                | Low risk                                     | Low risk                          | Low risk                                     |
|                                           |                               |                                                              |                                                              |                                                  |                        |                                                         |                                              |                                   |                                              |
| 番号                                        | 著者名 発表年<br>(Forest plot表示)    | risk of biasコメント                                             |                                                              |                                                  |                        |                                                         |                                              |                                   |                                              |
| 1                                         | Gainnier 2004                 | ランダム化の方法が未記載                                                 | 研究者たちは全員、割り付けやブロックサイズを知らされていなかった。                            | 担当看護師は盲検化されておらず、適切な筋弛緩が得られるまでプロトコルに基づいた流量調整を行った。 | 研究者には割り付けを知らされていなかった。  | 100%フォローされた                                             | 100%報告された                                    | 研究の中断なし                           | 全項目ほぼLow risk                                |
| 2                                         | Papazian 2010                 | 本研究は独立した機関によってデータと安全性を監視された。ランダム化と盲検化はCONSORTガイドラインに準じて行われた。 | 本研究は独立した機関によってデータと安全性を監視された。ランダム化と盲検化はCONSORTガイドラインに準じて行われた。 | 多施設共同ランダム化プラセボ対照二重盲検試験                           | 多施設共同ランダム化プラセボ対照二重盲検試験 | 99.7% (339/340)フォローされた。筋弛緩群の1名は治療開始前に同意撤回したため、解析から除外した。 | 100%報告された                                    | 研究の中断なし                           | 全項目ともLow risk                                |

| Outcome                                   |                               | ICU-acquired weakness                                        |                                                              | risk of bias                                      |                        | not serious (0)                                         |                                              |                                   |                                              |
|-------------------------------------------|-------------------------------|--------------------------------------------------------------|--------------------------------------------------------------|---------------------------------------------------|------------------------|---------------------------------------------------------|----------------------------------------------|-----------------------------------|----------------------------------------------|
| 番号                                        | 著者名 発表年<br>(Forest plot表示)    | risk of bias評価                                               |                                                              |                                                   |                        |                                                         |                                              |                                   |                                              |
|                                           |                               | ランダム割付順番の生成<br>random sequence generation                    | 割り付けの隠蔽化<br>allocation concealment                           | ブラインド<br>blinding                                 |                        | 不完全なアウトカムデータ<br>incomplete outcome data                 | 選択されたアウトカムの報告<br>selective outcome reporting | その他のバイアス<br>Other sources of bias | 研究内でのバイアスのリスク<br>Risk of bias within a study |
| 研究参加者と治療提供者<br>participants and personnel | アウトカム評価者<br>outcome assessors |                                                              |                                                              |                                                   |                        |                                                         |                                              |                                   |                                              |
| 1                                         | Forel 2006                    | Unclear risk                                                 | Low risk                                                     | High risk                                         | Low risk               | Low risk                                                | Low risk                                     | Low risk                          | Low risk                                     |
| 2                                         | Gainnier 2004                 | Unclear risk                                                 | Low risk                                                     | High risk                                         | Low risk               | Low risk                                                | Low risk                                     | Low risk                          | Low risk                                     |
| 3                                         | Papazian 2010                 | Low risk                                                     | Low risk                                                     | Low risk                                          | Low risk               | Low risk                                                | Low risk                                     | Low risk                          | Low risk                                     |
|                                           |                               |                                                              |                                                              |                                                   |                        |                                                         |                                              |                                   |                                              |
| 番号                                        | 著者名 発表年<br>(Forest plot表示)    | risk of biasコメント                                             |                                                              |                                                   |                        |                                                         |                                              |                                   |                                              |
| 1                                         | Forel 2006                    | ランダム化の方法が未記載                                                 | ランダム化は変動サイズブロックで等数になるように割り付けられた。研究者には割り付けを知らされていないかった。       | 担当看護師は筋弛緩薬の割り付けかどうかを知っていた。                        | 研究者には割り付けを知らされていないかった。 | 100%フォローされた                                             | 100%報告された                                    | 研究の中断なし                           | Low risk 3項目, Unclear 3項目 厳しい評価の方を採用         |
| 2                                         | Gainnier 2004                 | ランダム化の方法が未記載                                                 | 研究者たちは全員、割り付けやブロックサイズを知らされていないかった。                           | 担当看護師は盲検化されておらず、適切な筋弛緩薬が得られるまでプロトコルに基づいた流量調整を行った。 | 研究者には割り付けを知らされていないかった。 | 100%フォローされた                                             | 100%報告された                                    | 研究の中断なし                           | 全項目ほぼLow risk                                |
| 3                                         | Papazian 2010                 | 本研究は独立した機関によってデータと安全性を監視された。ランダム化と盲検化はCONSORTガイドラインに準じて行われた。 | 本研究は独立した機関によってデータと安全性を監視された。ランダム化と盲検化はCONSORTガイドラインに準じて行われた。 | 多施設共同ランダム化プラセボ対照二重盲検試験                            | 多施設共同ランダム化プラセボ対照二重盲検試験 | 99.7% (339/340)フォローされた。筋弛緩薬の1名は治療開始前に同意撤回したため、解析から除外した。 | 100%報告された                                    | 研究の中断なし                           | 全項目ともLow risk                                |

## Mortality in ICU

|               | Random sequence generation (selection bias) | Allocation concealment (selection bias) | Blinding of participants and personnel (performance bias) | Blinding of outcome assessment (detection bias) | Incomplete outcome data (attrition bias) | Selective reporting (reporting bias) | Other bias |
|---------------|---------------------------------------------|-----------------------------------------|-----------------------------------------------------------|-------------------------------------------------|------------------------------------------|--------------------------------------|------------|
| Forel 2006    | ?                                           | +                                       | -                                                         | +                                               | +                                        | +                                    | +          |
| Gainnier 2004 | ?                                           | +                                       | -                                                         | +                                               | +                                        | +                                    | +          |
| Papazian 2010 | +                                           | +                                       | +                                                         | +                                               | +                                        | +                                    | +          |

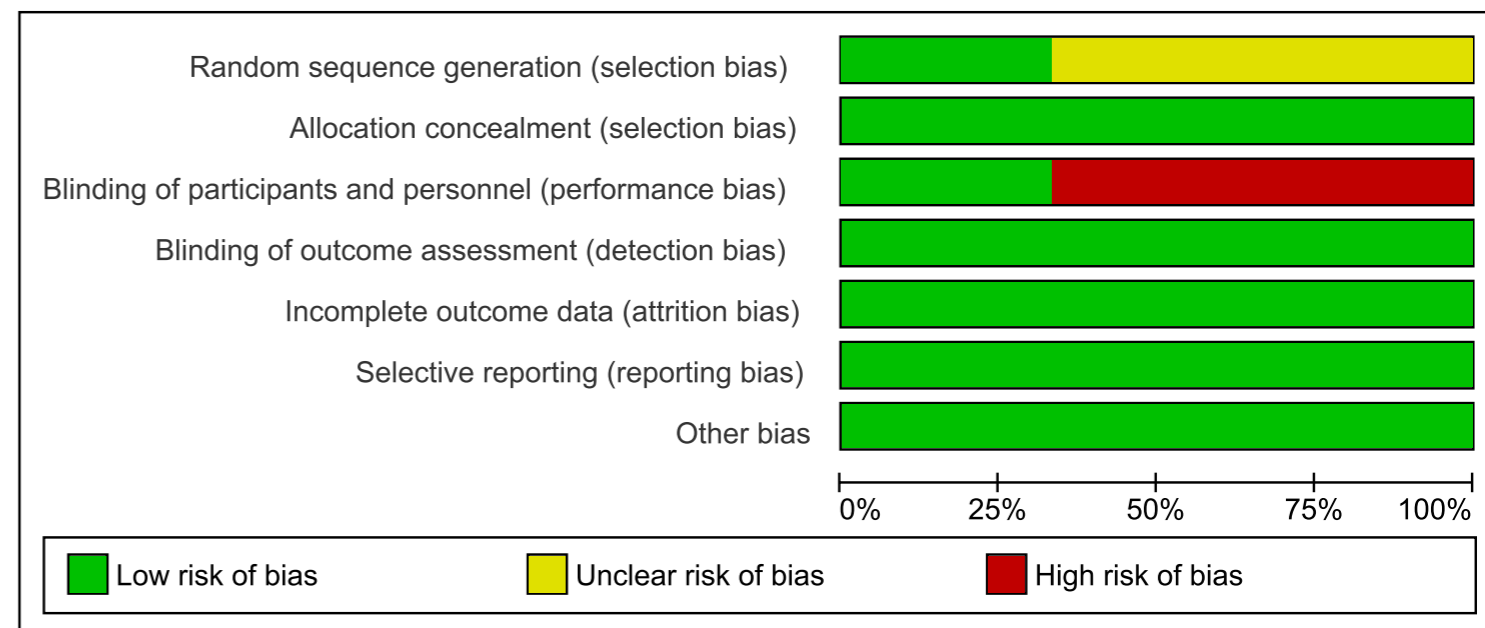



## Mortality (28 days)

|               | Random sequence generation (selection bias) | Allocation concealment (selection bias) | Blinding of participants and personnel (performance bias) | Blinding of outcome assessment (detection bias) | Incomplete outcome data (attrition bias) | Selective reporting (reporting bias) | Other bias |
|---------------|---------------------------------------------|-----------------------------------------|-----------------------------------------------------------|-------------------------------------------------|------------------------------------------|--------------------------------------|------------|
| Gainnier 2004 | ?                                           | +                                       | -                                                         | +                                               | +                                        | +                                    | +          |
| Papazian 2010 | +                                           | +                                       | +                                                         | +                                               | +                                        | +                                    | +          |

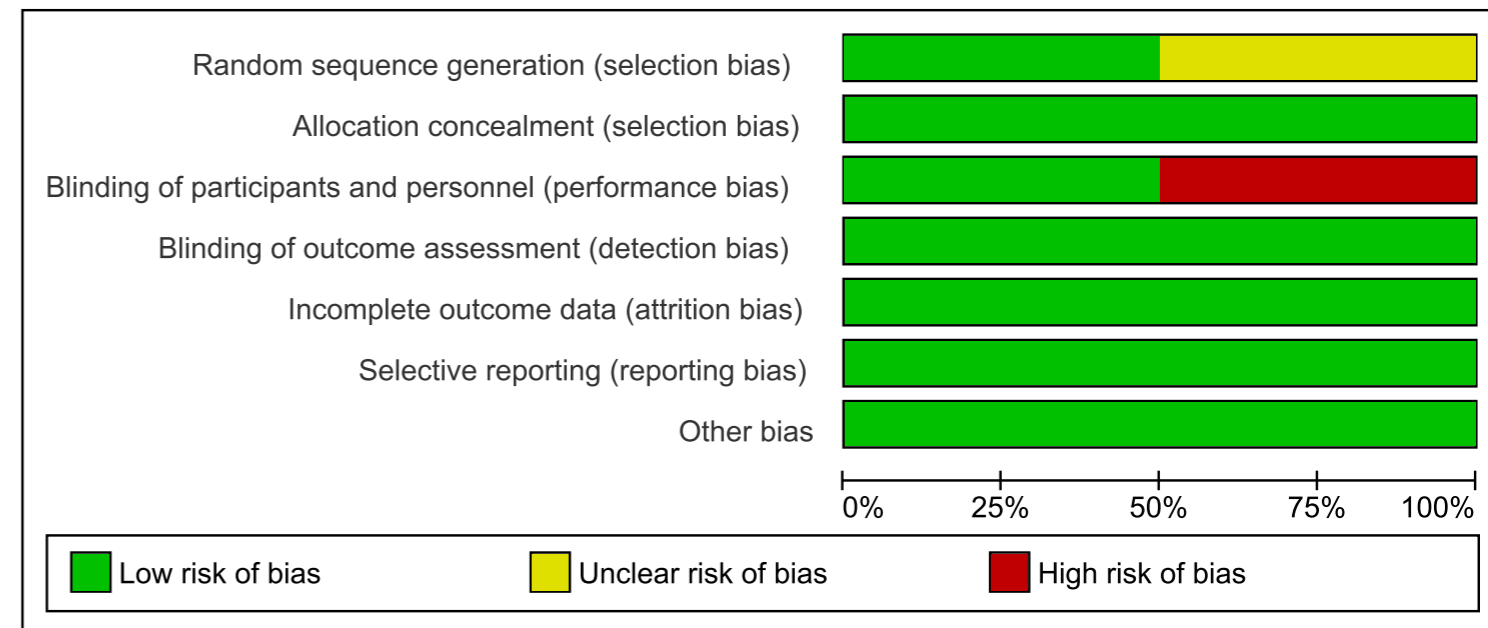

## Barotrauma

|               | Random sequence generation (selection bias) | Allocation concealment (selection bias) | Blinding of participants and personnel (performance bias) | Blinding of outcome assessment (detection bias) | Incomplete outcome data (attrition bias) | Selective reporting (reporting bias) | Other bias |
|---------------|---------------------------------------------|-----------------------------------------|-----------------------------------------------------------|-------------------------------------------------|------------------------------------------|--------------------------------------|------------|
| Gainnier 2004 | ?                                           | +                                       | -                                                         | +                                               | +                                        | +                                    | +          |
| Papazian 2010 | +                                           | +                                       | +                                                         | +                                               | +                                        | +                                    | +          |

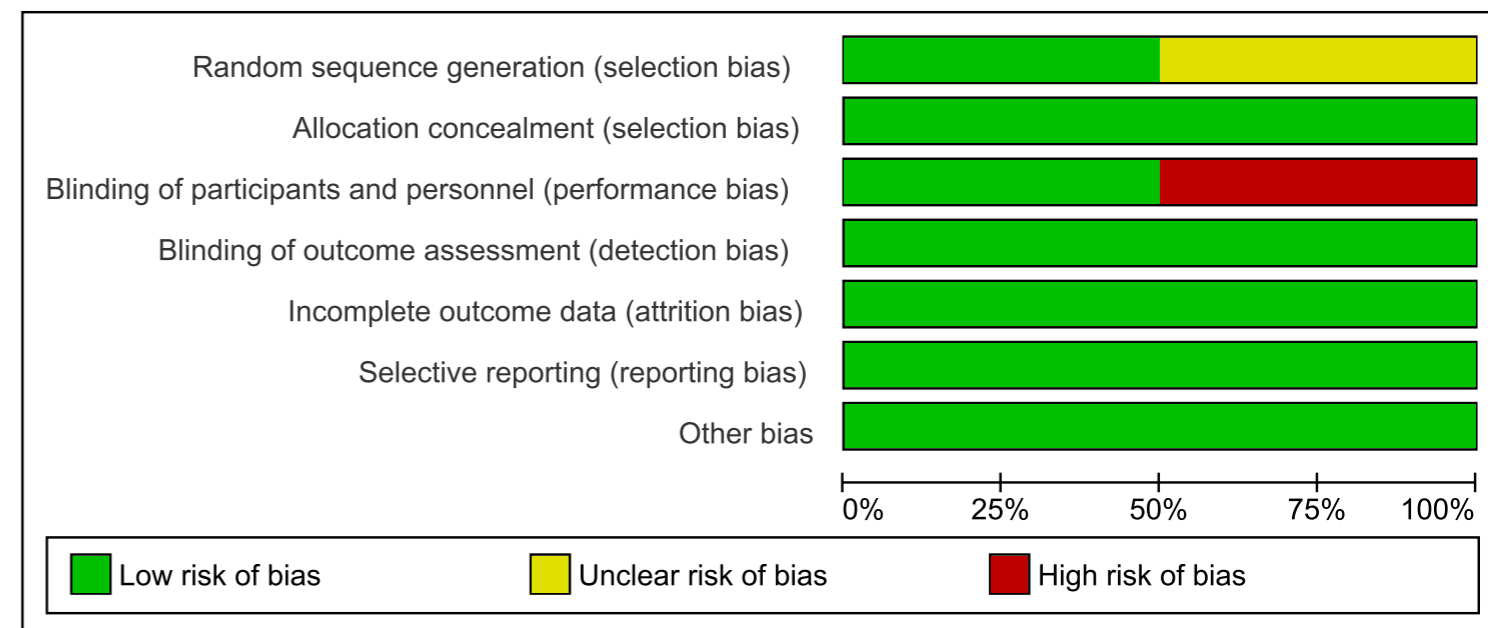

## ICU acquired weakness

|               | Random sequence generation (selection bias) | Allocation concealment (selection bias) | Blinding of participants and personnel (performance bias) | Blinding of outcome assessment (detection bias) | Incomplete outcome data (attrition bias) | Selective reporting (reporting bias) | Other bias |
|---------------|---------------------------------------------|-----------------------------------------|-----------------------------------------------------------|-------------------------------------------------|------------------------------------------|--------------------------------------|------------|
| Forel 2006    | ?                                           | +                                       | -                                                         | +                                               | +                                        | +                                    | +          |
| Gainnier 2004 | ?                                           | +                                       | -                                                         | +                                               | +                                        | +                                    | +          |
| Papazian 2010 | +                                           | +                                       | +                                                         | +                                               | +                                        | +                                    | +          |

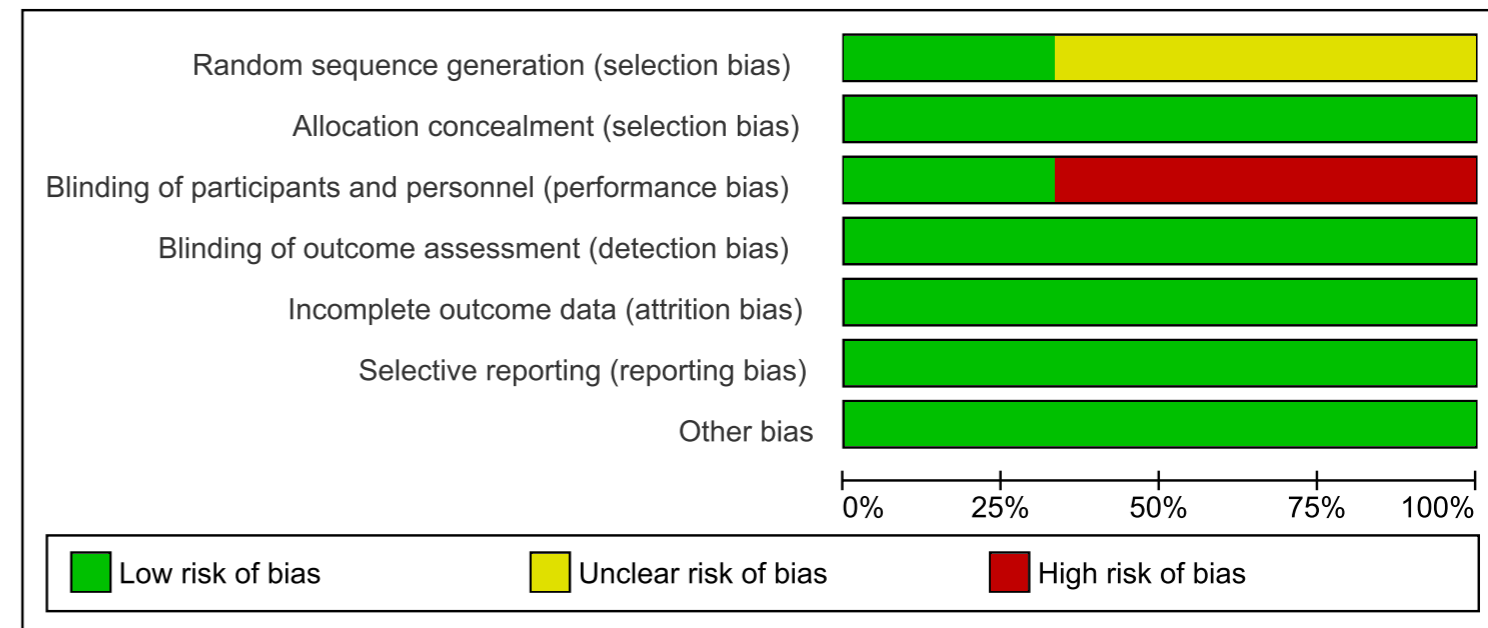

## Mortality in ICU

| Study or Subgroup                                                                                       | Cisatracurium |            | Placebo |            | Weight        | Risk Ratio          |                     |
|---------------------------------------------------------------------------------------------------------|---------------|------------|---------|------------|---------------|---------------------|---------------------|
|                                                                                                         | Events        | Total      | Events  | Total      |               | M-H, Random, 95% CI |                     |
| Forel 2006                                                                                              | 5             | 18         | 10      | 18         | 8.0%          | 0.50                | [0.21, 1.17]        |
| Gainnier 2004                                                                                           | 13            | 28         | 20      | 28         | 27.2%         | 0.65                | [0.41, 1.03]        |
| Papazian 2010                                                                                           | 52            | 177        | 63      | 162        | 64.8%         | 0.76                | [0.56, 1.02]        |
| <b>Total (95% CI)</b>                                                                                   |               | <b>223</b> |         | <b>208</b> | <b>100.0%</b> | <b>0.70</b>         | <b>[0.55, 0.89]</b> |
| Total events                                                                                            | 70            |            | 93      |            |               |                     |                     |
| Heterogeneity: Tau <sup>2</sup> = 0.00; Chi <sup>2</sup> = 0.95, df = 2 (P = 0.62); I <sup>2</sup> = 0% |               |            |         |            |               |                     |                     |
| Test for overall effect: Z = 2.88 (P = 0.004)                                                           |               |            |         |            |               |                     |                     |

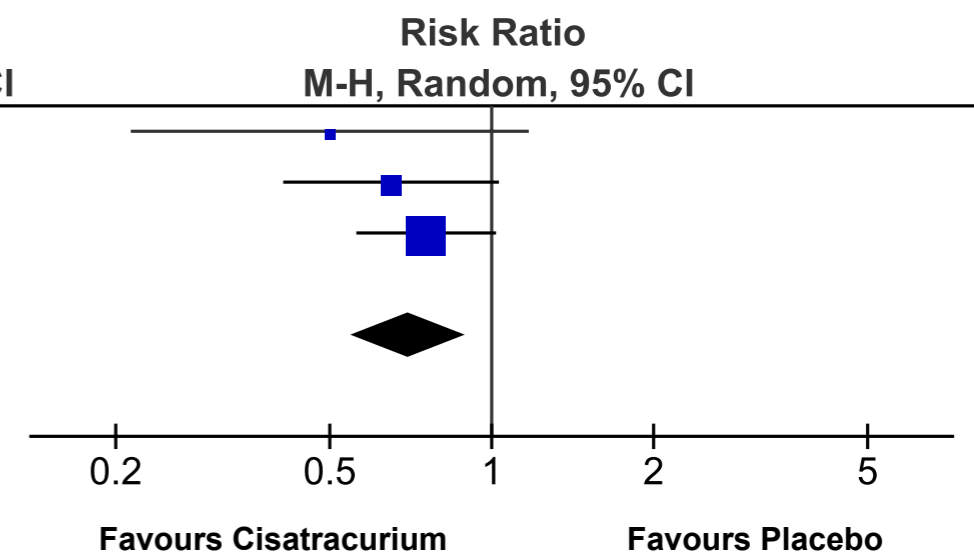

## Mortality (28 days)

| Study or Subgroup                                                                                       | Cisatracurium |            | Placebo |            | Weight        | Risk Ratio          |                     |
|---------------------------------------------------------------------------------------------------------|---------------|------------|---------|------------|---------------|---------------------|---------------------|
|                                                                                                         | Events        | Total      | Events  | Total      |               | M-H, Random, 95% CI |                     |
| Gainnier 2004                                                                                           | 10            | 28         | 17      | 28         | 25.9%         | 0.59                | [0.33, 1.05]        |
| Papazian 2010                                                                                           | 42            | 177        | 54      | 162        | 74.1%         | 0.71                | [0.51, 1.00]        |
| <b>Total (95% CI)</b>                                                                                   |               | <b>205</b> |         | <b>190</b> | <b>100.0%</b> | <b>0.68</b>         | <b>[0.50, 0.91]</b> |
| Total events                                                                                            | 52            |            | 71      |            |               |                     |                     |
| Heterogeneity: Tau <sup>2</sup> = 0.00; Chi <sup>2</sup> = 0.31, df = 1 (P = 0.58); I <sup>2</sup> = 0% |               |            |         |            |               |                     |                     |
| Test for overall effect: Z = 2.59 (P = 0.010)                                                           |               |            |         |            |               |                     |                     |

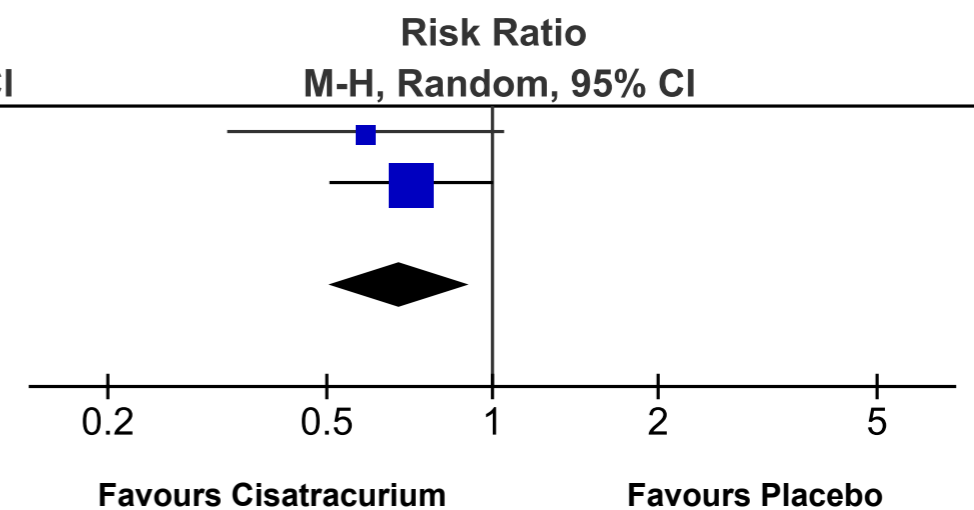

## Barotrauma

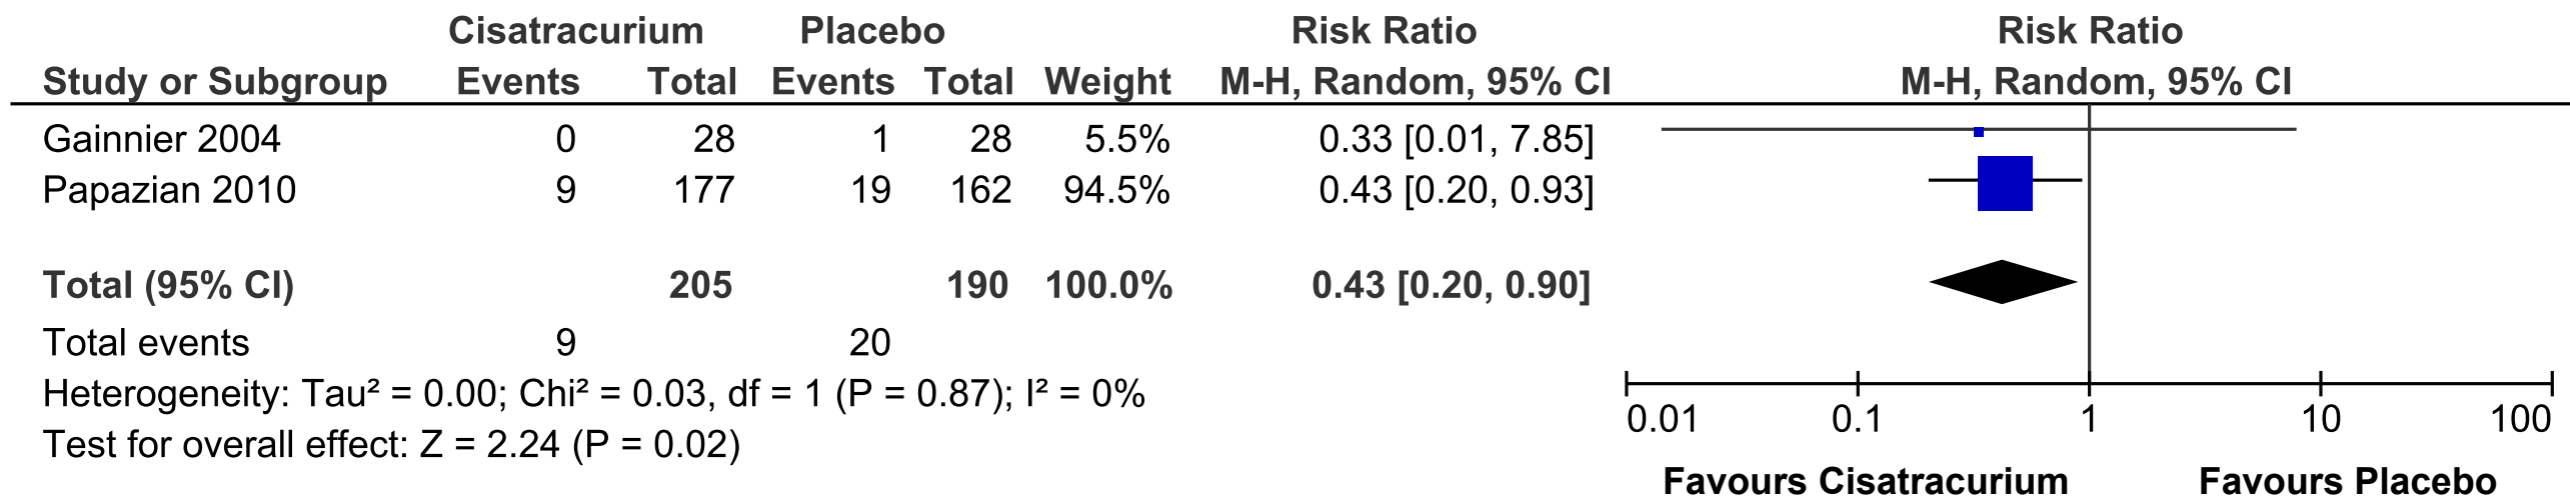

## ICU acquired weakness

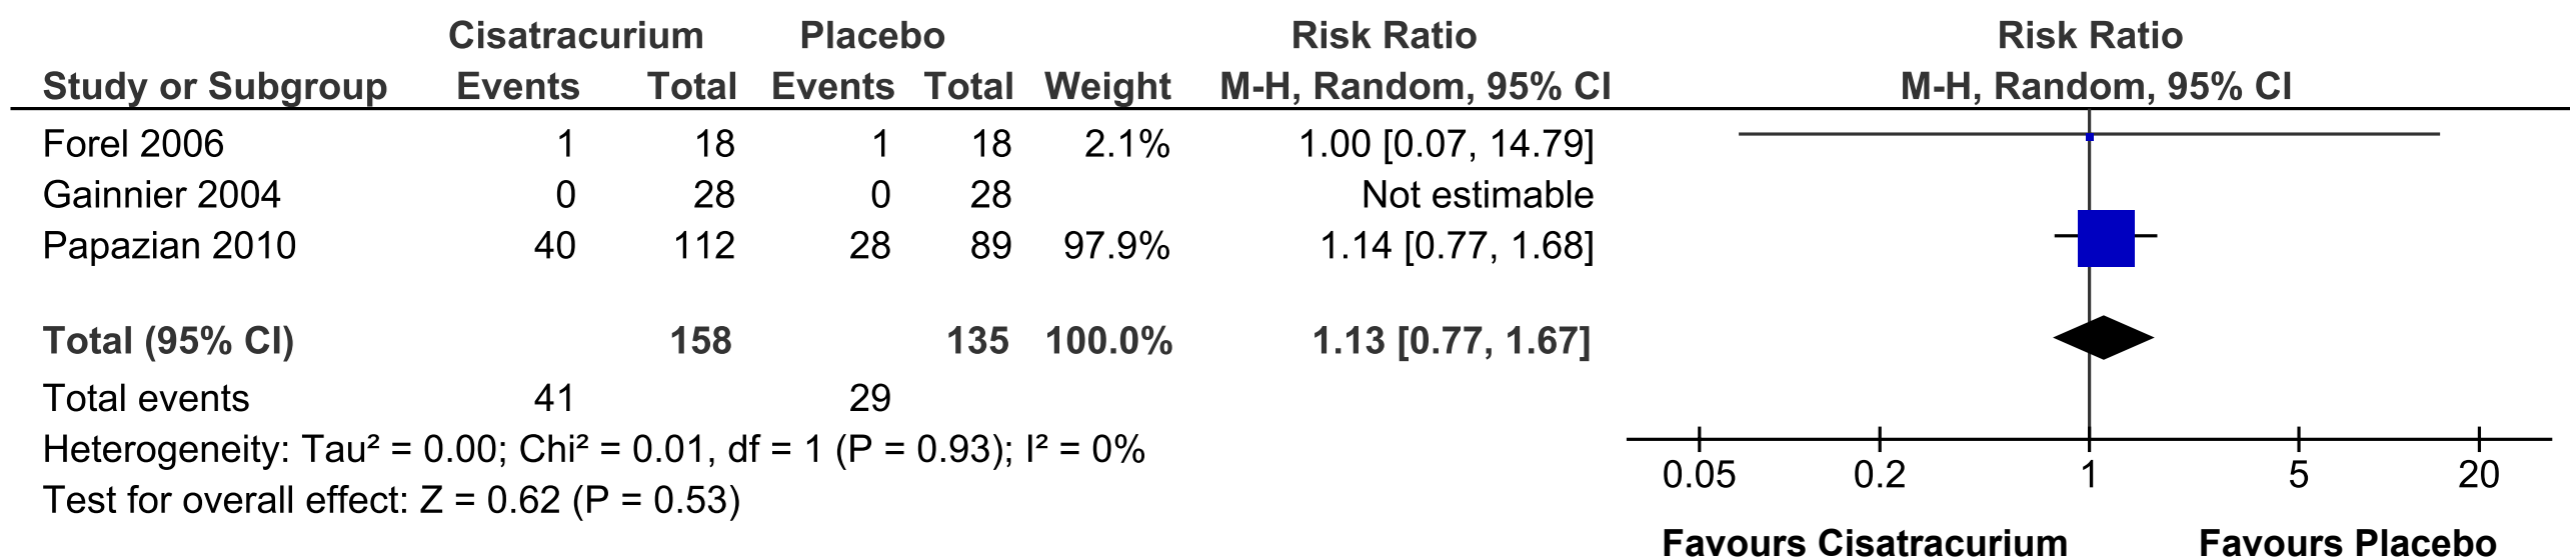

## Summary of findings:

## Neuromuscular blocker for adult ARDS compared to placebo for adult ARDS

**Patient or population :** Moderate to severe adult patients with ARDS within 48 hours from the onset

**Intervention :** Neuromuscular blocker (Cisatracurium) for 48-hour infusion

**Comparison :** Placebo

| Outcomes              | Anticipated absolute effects* (95% CI) |                                     | Relative effect (95% CI)  | № of participants (studies) | Quality of the evidence (GRADE) | Comments |
|-----------------------|----------------------------------------|-------------------------------------|---------------------------|-----------------------------|---------------------------------|----------|
|                       | Risk with placebo                      | Risk with NMB                       |                           |                             |                                 |          |
| ICU mortality         | Study population                       |                                     | RR 0.70<br>(0.55 to 0.89) | 431<br>(3 RCTs)             | ⊕⊕⊕○<br>MODERATE 1,2            |          |
|                       | 447 per 1000                           | <b>313 per 1000</b><br>(246 to 398) |                           |                             |                                 |          |
|                       | Low risk population                    |                                     |                           |                             |                                 |          |
|                       | 313 per 1000                           | <b>219 per 1000</b><br>(172 to 279) |                           |                             |                                 |          |
| 28-day mortality      | High risk population                   |                                     | RR 0.68<br>(0.50 to 0.91) | 395<br>(2 RCTs)             | ⊕⊕⊕○<br>MODERATE 1,2            |          |
|                       | 389 per 1000                           | <b>272 per 1000</b><br>(214 to 346) |                           |                             |                                 |          |
|                       | Study population                       |                                     |                           |                             |                                 |          |
|                       | 374 per 1000                           | <b>254 per 1000</b><br>(187 to 340) |                           |                             |                                 |          |
| Barotrauma            | Low risk population                    |                                     | RR 0.43<br>(0.20 to 0.90) | 395<br>(2 RCTs)             | ⊕⊕⊕○<br>MODERATE 1,2            |          |
|                       | 254 per 1000                           | <b>173 per 1000</b><br>(127 to 231) |                           |                             |                                 |          |
|                       | High risk population                   |                                     |                           |                             |                                 |          |
|                       | 320 per 1000                           | <b>218 per 1000</b><br>(160 to 291) |                           |                             |                                 |          |
| ICU-acquired weakness | Study population                       |                                     | RR 1.13<br>(0.77 to 1.67) | 293<br>(3 RCTs)             | ⊕⊕⊕○<br>MODERATE 1,2            |          |
|                       | 105 per 1000                           | <b>45 per 1000</b><br>(21 to 95)    |                           |                             |                                 |          |
|                       | Moderate risk population               |                                     |                           |                             |                                 |          |
|                       | 33 per 1000                            | <b>14 per 1000</b><br>(7 to 30)     |                           |                             |                                 |          |
| ICU-acquired weakness | Study population                       |                                     | RR 1.13<br>(0.77 to 1.67) | 293<br>(3 RCTs)             | ⊕⊕⊕○<br>MODERATE 1,2            |          |
|                       | 215 per 1000                           | <b>243 per 1000</b><br>(165 to 359) |                           |                             |                                 |          |
|                       | Moderate risk population               |                                     |                           |                             |                                 |          |
|                       | 63 per 1000                            | <b>71 per 1000</b><br>(49 to 105)   |                           |                             |                                 |          |

\*The risk in the intervention group (and its 95% confidence interval) is based on the assumed risk in the comparison group and the relative effect of the intervention (and its 95% CI).

CI: Confidence interval; RR: Risk ratio; OR: Odds ratio

## GRADE Working Group grades of evidence

**High quality:** We are very confident that the true effect lies close to that of the estimate of the effect

**Moderate quality:** We are moderately confident in the effect estimate: The true effect is likely to be close to the estimate of the effect, but there is a possibility that it is substantially different

**Low quality:** Our confidence in the effect estimate is limited: The true effect may be substantially different from the estimate of the effect

**Very low quality:** We have very little confidence in the effect estimate: The true effect is likely to be substantially different from the estimate of effect

1. Although an insufficient blindness of nurses could be a significant bias, a risk of bias was evaluated as "not serious".
2. Because cisatracurium is not available in Japan, indirectness was evaluated as "serious".

Table 1 I. Evidence profile

**CQ9: Neuromuscular blocking agents (NMBA) for adult patients with ARDS compared to placebo for adult patients with ARDS**

| Quality assessment    |                   |                          |               |                      |             |                      | № of patients  |                | Effect                |                                         | Quality                      | Importance |
|-----------------------|-------------------|--------------------------|---------------|----------------------|-------------|----------------------|----------------|----------------|-----------------------|-----------------------------------------|------------------------------|------------|
| № of studies          | Study design      | Risk of bias             | Inconsistency | Indirectness         | Imprecision | Other considerations | NMB for ARDS   | placebo        | Relative (95% CI)     | Absolute (95% CI)                       |                              |            |
| ICU mortality         |                   |                          |               |                      |             |                      |                |                |                       |                                         |                              |            |
| 3                     | Randomized trials | Not serious <sup>1</sup> | Not serious   | Serious <sup>2</sup> | Not serious | None                 | 70/223 (31.4%) | 93/208 (44.7%) | RR 0.70 (0.55 ~ 0.89) | 134 fewer / 1000 (49 fewer ~ 201 fewer) | ⊕⊕⊕⊖ MODERATE <sup>1,2</sup> | CRITICAL   |
|                       |                   |                          |               |                      |             |                      |                | 31.3%          |                       | 94 fewer / 1000 (34 fewer ~ 141 fewer)  |                              |            |
|                       |                   |                          |               |                      |             |                      |                | 38.9%          |                       | 117 fewer / 1000 (43 fewer ~ 175 fewer) |                              |            |
| 28-day mortality      |                   |                          |               |                      |             |                      |                |                |                       |                                         |                              |            |
| 2                     | Randomized trials | Not serious <sup>1</sup> | Not serious   | Serious <sup>2</sup> | Not serious | None                 | 52/205 (25.4%) | 71/190 (37.4%) | RR 0.68 (0.50 ~ 0.91) | 120 fewer / 1000 (34 fewer ~ 187 fewer) | ⊕⊕⊕⊖ MODERATE <sup>1,2</sup> | CRITICAL   |
|                       |                   |                          |               |                      |             |                      |                | 25.4%          |                       | 81 fewer / 1000 (23 fewer ~ 127 fewer)  |                              |            |
|                       |                   |                          |               |                      |             |                      |                | 32.0%          |                       | 102 fewer / 1000 (29 fewer ~ 160 fewer) |                              |            |
| Barotrauma            |                   |                          |               |                      |             |                      |                |                |                       |                                         |                              |            |
| 2                     | Randomized trials | Not serious <sup>1</sup> | Not serious   | Serious <sup>2</sup> | Not serious | None                 | 9/205 (4.4%)   | 20/190 (10.5%) | RR 0.43 (0.20 ~ 0.90) | 60 fewer / 1000 (11 fewer ~ 84 fewer)   | ⊕⊕⊕⊖ MODERATE <sup>1,2</sup> | IMPORTANT  |
|                       |                   |                          |               |                      |             |                      |                | 3.3%           |                       | 19 fewer / 1000 (3 fewer ~ 26 fewer)    |                              |            |
| ICU-acquired weakness |                   |                          |               |                      |             |                      |                |                |                       |                                         |                              |            |
| 3                     | Randomized trials | Not serious <sup>1</sup> | Not serious   | Serious <sup>2</sup> | Not serious | None                 | 41/158 (25.9%) | 29/135 (21.5%) | RR 1.13 (0.77 ~ 1.67) | 28 more / 1000 (49 fewer ~ 144 more)    | ⊕⊕⊕⊖ MODERATE <sup>1,2</sup> | IMPORTANT  |
|                       |                   |                          |               |                      |             |                      |                | 6.3%           |                       | 8 more / 1000 (14 fewer ~ 42 more)      |                              |            |

RR – relative risk

- Although the fact that the nurses could not be blinded to the therapy could be a significant bias, the risk of bias was evaluated as “not serious”.
- Since cisatracurium is not available in Japan, indirectness was evaluated as “serious”.

**Evidence-to-Decision Table**

**CQ9: Should neuromuscular blocking agents be used in adult patients with ARDS requiring mechanical ventilation?**

POPULATION : ADULT PATIENTS WITH MODERATE TO SEVERE ARDS WITHIN 48 HOURS OF ONSET

INTERVENTION : NEUROMUSCULAR BLOCKING AGENT (CISATRACRIUM) FOR 48-HOUR INFUSION

| CRITERIA                                   | JUDGEMENTS                                                                                                                                                                                                                                                                                                                                                                                                                                                            | RESEARCH EVIDENCE                                                                                                                                                                                                                                                                                                                                                                                                                                                                                                                                                                                                                                                                                                                                                                                                                                                                                                                                                                                                                                                                                                                                                                                                                                                                                                                                                                                                                                                                                                                                                                                                                                                                                                                                                                                                                                                                                                                                                                                                                                                                                                                                                                                                                                                                                                                                                                                                                                                                                                                                                                                                                                                        | ADDITIONAL CONSIDERATION                                                                    |                                  |                                 |               |          |                  |                  |          |                  |            |           |                  |                       |           |                  |          |                   |                        |                          |                          |               |            |                                   |                                               |                                  |            |                                   |                                              |            |                                   |                                               |                  |            |                                   |                                               |                                  |            |                                   |                                              |            |                                   |                                               |            |            |                                |                                             |                                  |           |                               |                                            |                       |            |                                   |                                            |                                  |           |                                 |                                          |  |
|--------------------------------------------|-----------------------------------------------------------------------------------------------------------------------------------------------------------------------------------------------------------------------------------------------------------------------------------------------------------------------------------------------------------------------------------------------------------------------------------------------------------------------|--------------------------------------------------------------------------------------------------------------------------------------------------------------------------------------------------------------------------------------------------------------------------------------------------------------------------------------------------------------------------------------------------------------------------------------------------------------------------------------------------------------------------------------------------------------------------------------------------------------------------------------------------------------------------------------------------------------------------------------------------------------------------------------------------------------------------------------------------------------------------------------------------------------------------------------------------------------------------------------------------------------------------------------------------------------------------------------------------------------------------------------------------------------------------------------------------------------------------------------------------------------------------------------------------------------------------------------------------------------------------------------------------------------------------------------------------------------------------------------------------------------------------------------------------------------------------------------------------------------------------------------------------------------------------------------------------------------------------------------------------------------------------------------------------------------------------------------------------------------------------------------------------------------------------------------------------------------------------------------------------------------------------------------------------------------------------------------------------------------------------------------------------------------------------------------------------------------------------------------------------------------------------------------------------------------------------------------------------------------------------------------------------------------------------------------------------------------------------------------------------------------------------------------------------------------------------------------------------------------------------------------------------------------------------|---------------------------------------------------------------------------------------------|----------------------------------|---------------------------------|---------------|----------|------------------|------------------|----------|------------------|------------|-----------|------------------|-----------------------|-----------|------------------|----------|-------------------|------------------------|--------------------------|--------------------------|---------------|------------|-----------------------------------|-----------------------------------------------|----------------------------------|------------|-----------------------------------|----------------------------------------------|------------|-----------------------------------|-----------------------------------------------|------------------|------------|-----------------------------------|-----------------------------------------------|----------------------------------|------------|-----------------------------------|----------------------------------------------|------------|-----------------------------------|-----------------------------------------------|------------|------------|--------------------------------|---------------------------------------------|----------------------------------|-----------|-------------------------------|--------------------------------------------|-----------------------|------------|-----------------------------------|--------------------------------------------|----------------------------------|-----------|---------------------------------|------------------------------------------|--|
| <b>PROBLEM</b>                             | <input type="radio"/> No<br><input type="radio"/> Probably no<br><input checked="" type="radio"/> Probably yes<br><input type="radio"/> Yes<br>-----<br><input type="radio"/> Varies<br><input type="radio"/> Don't know                                                                                                                                                                                                                                              | Recent studies suggest that treatment modalities preserving spontaneous breathing prevent ICU-acquired weakness and ventilation-perfusion mismatch in patients with ARDS {Girard, 2007 #130}. However, several studies suggest that excessive stress in alveoli due to spontaneous breathing impairs alveolar stability, which may contribute to the poor prognosis in patients with ARDS {Rittayamai, 2015 #131}. The decision to preserve spontaneous breathing or to decrease/prohibit spontaneous breathing by using neuromuscular blockers may have opposite effects on the prognosis in patients with ARDS so the priority of this clinical question is high.                                                                                                                                                                                                                                                                                                                                                                                                                                                                                                                                                                                                                                                                                                                                                                                                                                                                                                                                                                                                                                                                                                                                                                                                                                                                                                                                                                                                                                                                                                                                                                                                                                                                                                                                                                                                                                                                                                                                                                                                      |                                                                                             |                                  |                                 |               |          |                  |                  |          |                  |            |           |                  |                       |           |                  |          |                   |                        |                          |                          |               |            |                                   |                                               |                                  |            |                                   |                                              |            |                                   |                                               |                  |            |                                   |                                               |                                  |            |                                   |                                              |            |                                   |                                               |            |            |                                |                                             |                                  |           |                               |                                            |                       |            |                                   |                                            |                                  |           |                                 |                                          |  |
| <b>BENEFITS &amp; HARMS OF THE OPTIONS</b> | <p><b>What is the overall certainty of the evidence of effects?</b></p> <input type="radio"/> Very low<br><input type="radio"/> Low<br><input checked="" type="radio"/> Moderate<br><input type="radio"/> High<br>-----<br><input type="radio"/> No included studies                                                                                                                                                                                                  | <p><b>The relative importance or values of the main outcomes of interest</b></p> <table border="1" style="width: 100%; border-collapse: collapse;"> <thead> <tr> <th>Outcomes</th> <th>Relative importance</th> <th>Quality of the evidence (GRADE)</th> </tr> </thead> <tbody> <tr> <td>ICU mortality</td> <td>CRITICAL</td> <td>⊕⊕⊕⊖<br/>MODERATE</td> </tr> <tr> <td>28-day mortality</td> <td>CRITICAL</td> <td>⊕⊕⊕⊖<br/>MODERATE</td> </tr> <tr> <td>Barotrauma</td> <td>IMPORTANT</td> <td>⊕⊕⊕⊖<br/>MODERATE</td> </tr> <tr> <td>ICU-acquired weakness</td> <td>IMPORTANT</td> <td>⊕⊕⊕⊖<br/>MODERATE</td> </tr> </tbody> </table> <p><b>Summary of findings:</b></p> <table border="1" style="width: 100%; border-collapse: collapse;"> <thead> <tr> <th>Outcomes</th> <th>Risk with placebo</th> <th>Risk with intervention</th> <th>Absolute effect (95% CI)</th> <th>Relative effect (95% CI)</th> </tr> </thead> <tbody> <tr> <td rowspan="3">ICU mortality</td> <td>447 / 1000</td> <td><b>313 / 1000</b><br/>(246 to 398)</td> <td>134 fewer per 1000<br/>(49 fewer to 201 fewer)</td> <td rowspan="3"><b>RR 0.70</b><br/>(0.55 to 0.89)</td> </tr> <tr> <td>313 / 1000</td> <td><b>219 / 1000</b><br/>(172 to 279)</td> <td>94 fewer per 1000<br/>(34 fewer to 141 fewer)</td> </tr> <tr> <td>389 / 1000</td> <td><b>272 / 1000</b><br/>(214 to 346)</td> <td>117 fewer per 1000<br/>(43 fewer to 175 fewer)</td> </tr> <tr> <td rowspan="3">28-day mortality</td> <td>374 / 1000</td> <td><b>254 / 1000</b><br/>(187 to 340)</td> <td>120 fewer per 1000<br/>(34 fewer to 187 fewer)</td> <td rowspan="3"><b>RR 0.68</b><br/>(0.50 to 0.91)</td> </tr> <tr> <td>254 / 1000</td> <td><b>173 / 1000</b><br/>(127 to 231)</td> <td>81 fewer per 1000<br/>(23 fewer to 127 fewer)</td> </tr> <tr> <td>320 / 1000</td> <td><b>218 / 1000</b><br/>(160 to 291)</td> <td>102 fewer per 1000<br/>(29 fewer to 160 fewer)</td> </tr> <tr> <td rowspan="2">Barotrauma</td> <td>105 / 1000</td> <td><b>45 / 1000</b><br/>(21 to 95)</td> <td>60 fewer per 1000<br/>(11 fewer to 84 fewer)</td> <td rowspan="2"><b>RR 0.43</b><br/>(0.20 to 0.90)</td> </tr> <tr> <td>33 / 1000</td> <td><b>14 / 1000</b><br/>(7 to 30)</td> <td>19 fewer per 1000<br/>(3 fewer to 26 fewer)</td> </tr> <tr> <td rowspan="2">ICU-acquired weakness</td> <td>215 / 1000</td> <td><b>243 / 1000</b><br/>(165 to 359)</td> <td>28 more per 1000<br/>(49 fewer to 144 more)</td> <td rowspan="2"><b>RR 1.13</b><br/>(0.77 to 1.67)</td> </tr> <tr> <td>63 / 1000</td> <td><b>71 / 1000</b><br/>(49 to 105)</td> <td>8 more per 1000<br/>(14 fewer to 42 more)</td> </tr> </tbody> </table> | Outcomes                                                                                    | Relative importance              | Quality of the evidence (GRADE) | ICU mortality | CRITICAL | ⊕⊕⊕⊖<br>MODERATE | 28-day mortality | CRITICAL | ⊕⊕⊕⊖<br>MODERATE | Barotrauma | IMPORTANT | ⊕⊕⊕⊖<br>MODERATE | ICU-acquired weakness | IMPORTANT | ⊕⊕⊕⊖<br>MODERATE | Outcomes | Risk with placebo | Risk with intervention | Absolute effect (95% CI) | Relative effect (95% CI) | ICU mortality | 447 / 1000 | <b>313 / 1000</b><br>(246 to 398) | 134 fewer per 1000<br>(49 fewer to 201 fewer) | <b>RR 0.70</b><br>(0.55 to 0.89) | 313 / 1000 | <b>219 / 1000</b><br>(172 to 279) | 94 fewer per 1000<br>(34 fewer to 141 fewer) | 389 / 1000 | <b>272 / 1000</b><br>(214 to 346) | 117 fewer per 1000<br>(43 fewer to 175 fewer) | 28-day mortality | 374 / 1000 | <b>254 / 1000</b><br>(187 to 340) | 120 fewer per 1000<br>(34 fewer to 187 fewer) | <b>RR 0.68</b><br>(0.50 to 0.91) | 254 / 1000 | <b>173 / 1000</b><br>(127 to 231) | 81 fewer per 1000<br>(23 fewer to 127 fewer) | 320 / 1000 | <b>218 / 1000</b><br>(160 to 291) | 102 fewer per 1000<br>(29 fewer to 160 fewer) | Barotrauma | 105 / 1000 | <b>45 / 1000</b><br>(21 to 95) | 60 fewer per 1000<br>(11 fewer to 84 fewer) | <b>RR 0.43</b><br>(0.20 to 0.90) | 33 / 1000 | <b>14 / 1000</b><br>(7 to 30) | 19 fewer per 1000<br>(3 fewer to 26 fewer) | ICU-acquired weakness | 215 / 1000 | <b>243 / 1000</b><br>(165 to 359) | 28 more per 1000<br>(49 fewer to 144 more) | <b>RR 1.13</b><br>(0.77 to 1.67) | 63 / 1000 | <b>71 / 1000</b><br>(49 to 105) | 8 more per 1000<br>(14 fewer to 42 more) |  |
| Outcomes                                   | Relative importance                                                                                                                                                                                                                                                                                                                                                                                                                                                   | Quality of the evidence (GRADE)                                                                                                                                                                                                                                                                                                                                                                                                                                                                                                                                                                                                                                                                                                                                                                                                                                                                                                                                                                                                                                                                                                                                                                                                                                                                                                                                                                                                                                                                                                                                                                                                                                                                                                                                                                                                                                                                                                                                                                                                                                                                                                                                                                                                                                                                                                                                                                                                                                                                                                                                                                                                                                          |                                                                                             |                                  |                                 |               |          |                  |                  |          |                  |            |           |                  |                       |           |                  |          |                   |                        |                          |                          |               |            |                                   |                                               |                                  |            |                                   |                                              |            |                                   |                                               |                  |            |                                   |                                               |                                  |            |                                   |                                              |            |                                   |                                               |            |            |                                |                                             |                                  |           |                               |                                            |                       |            |                                   |                                            |                                  |           |                                 |                                          |  |
| ICU mortality                              | CRITICAL                                                                                                                                                                                                                                                                                                                                                                                                                                                              | ⊕⊕⊕⊖<br>MODERATE                                                                                                                                                                                                                                                                                                                                                                                                                                                                                                                                                                                                                                                                                                                                                                                                                                                                                                                                                                                                                                                                                                                                                                                                                                                                                                                                                                                                                                                                                                                                                                                                                                                                                                                                                                                                                                                                                                                                                                                                                                                                                                                                                                                                                                                                                                                                                                                                                                                                                                                                                                                                                                                         |                                                                                             |                                  |                                 |               |          |                  |                  |          |                  |            |           |                  |                       |           |                  |          |                   |                        |                          |                          |               |            |                                   |                                               |                                  |            |                                   |                                              |            |                                   |                                               |                  |            |                                   |                                               |                                  |            |                                   |                                              |            |                                   |                                               |            |            |                                |                                             |                                  |           |                               |                                            |                       |            |                                   |                                            |                                  |           |                                 |                                          |  |
| 28-day mortality                           | CRITICAL                                                                                                                                                                                                                                                                                                                                                                                                                                                              | ⊕⊕⊕⊖<br>MODERATE                                                                                                                                                                                                                                                                                                                                                                                                                                                                                                                                                                                                                                                                                                                                                                                                                                                                                                                                                                                                                                                                                                                                                                                                                                                                                                                                                                                                                                                                                                                                                                                                                                                                                                                                                                                                                                                                                                                                                                                                                                                                                                                                                                                                                                                                                                                                                                                                                                                                                                                                                                                                                                                         |                                                                                             |                                  |                                 |               |          |                  |                  |          |                  |            |           |                  |                       |           |                  |          |                   |                        |                          |                          |               |            |                                   |                                               |                                  |            |                                   |                                              |            |                                   |                                               |                  |            |                                   |                                               |                                  |            |                                   |                                              |            |                                   |                                               |            |            |                                |                                             |                                  |           |                               |                                            |                       |            |                                   |                                            |                                  |           |                                 |                                          |  |
| Barotrauma                                 | IMPORTANT                                                                                                                                                                                                                                                                                                                                                                                                                                                             | ⊕⊕⊕⊖<br>MODERATE                                                                                                                                                                                                                                                                                                                                                                                                                                                                                                                                                                                                                                                                                                                                                                                                                                                                                                                                                                                                                                                                                                                                                                                                                                                                                                                                                                                                                                                                                                                                                                                                                                                                                                                                                                                                                                                                                                                                                                                                                                                                                                                                                                                                                                                                                                                                                                                                                                                                                                                                                                                                                                                         |                                                                                             |                                  |                                 |               |          |                  |                  |          |                  |            |           |                  |                       |           |                  |          |                   |                        |                          |                          |               |            |                                   |                                               |                                  |            |                                   |                                              |            |                                   |                                               |                  |            |                                   |                                               |                                  |            |                                   |                                              |            |                                   |                                               |            |            |                                |                                             |                                  |           |                               |                                            |                       |            |                                   |                                            |                                  |           |                                 |                                          |  |
| ICU-acquired weakness                      | IMPORTANT                                                                                                                                                                                                                                                                                                                                                                                                                                                             | ⊕⊕⊕⊖<br>MODERATE                                                                                                                                                                                                                                                                                                                                                                                                                                                                                                                                                                                                                                                                                                                                                                                                                                                                                                                                                                                                                                                                                                                                                                                                                                                                                                                                                                                                                                                                                                                                                                                                                                                                                                                                                                                                                                                                                                                                                                                                                                                                                                                                                                                                                                                                                                                                                                                                                                                                                                                                                                                                                                                         |                                                                                             |                                  |                                 |               |          |                  |                  |          |                  |            |           |                  |                       |           |                  |          |                   |                        |                          |                          |               |            |                                   |                                               |                                  |            |                                   |                                              |            |                                   |                                               |                  |            |                                   |                                               |                                  |            |                                   |                                              |            |                                   |                                               |            |            |                                |                                             |                                  |           |                               |                                            |                       |            |                                   |                                            |                                  |           |                                 |                                          |  |
| Outcomes                                   | Risk with placebo                                                                                                                                                                                                                                                                                                                                                                                                                                                     | Risk with intervention                                                                                                                                                                                                                                                                                                                                                                                                                                                                                                                                                                                                                                                                                                                                                                                                                                                                                                                                                                                                                                                                                                                                                                                                                                                                                                                                                                                                                                                                                                                                                                                                                                                                                                                                                                                                                                                                                                                                                                                                                                                                                                                                                                                                                                                                                                                                                                                                                                                                                                                                                                                                                                                   | Absolute effect (95% CI)                                                                    | Relative effect (95% CI)         |                                 |               |          |                  |                  |          |                  |            |           |                  |                       |           |                  |          |                   |                        |                          |                          |               |            |                                   |                                               |                                  |            |                                   |                                              |            |                                   |                                               |                  |            |                                   |                                               |                                  |            |                                   |                                              |            |                                   |                                               |            |            |                                |                                             |                                  |           |                               |                                            |                       |            |                                   |                                            |                                  |           |                                 |                                          |  |
| ICU mortality                              | 447 / 1000                                                                                                                                                                                                                                                                                                                                                                                                                                                            | <b>313 / 1000</b><br>(246 to 398)                                                                                                                                                                                                                                                                                                                                                                                                                                                                                                                                                                                                                                                                                                                                                                                                                                                                                                                                                                                                                                                                                                                                                                                                                                                                                                                                                                                                                                                                                                                                                                                                                                                                                                                                                                                                                                                                                                                                                                                                                                                                                                                                                                                                                                                                                                                                                                                                                                                                                                                                                                                                                                        | 134 fewer per 1000<br>(49 fewer to 201 fewer)                                               | <b>RR 0.70</b><br>(0.55 to 0.89) |                                 |               |          |                  |                  |          |                  |            |           |                  |                       |           |                  |          |                   |                        |                          |                          |               |            |                                   |                                               |                                  |            |                                   |                                              |            |                                   |                                               |                  |            |                                   |                                               |                                  |            |                                   |                                              |            |                                   |                                               |            |            |                                |                                             |                                  |           |                               |                                            |                       |            |                                   |                                            |                                  |           |                                 |                                          |  |
|                                            | 313 / 1000                                                                                                                                                                                                                                                                                                                                                                                                                                                            | <b>219 / 1000</b><br>(172 to 279)                                                                                                                                                                                                                                                                                                                                                                                                                                                                                                                                                                                                                                                                                                                                                                                                                                                                                                                                                                                                                                                                                                                                                                                                                                                                                                                                                                                                                                                                                                                                                                                                                                                                                                                                                                                                                                                                                                                                                                                                                                                                                                                                                                                                                                                                                                                                                                                                                                                                                                                                                                                                                                        | 94 fewer per 1000<br>(34 fewer to 141 fewer)                                                |                                  |                                 |               |          |                  |                  |          |                  |            |           |                  |                       |           |                  |          |                   |                        |                          |                          |               |            |                                   |                                               |                                  |            |                                   |                                              |            |                                   |                                               |                  |            |                                   |                                               |                                  |            |                                   |                                              |            |                                   |                                               |            |            |                                |                                             |                                  |           |                               |                                            |                       |            |                                   |                                            |                                  |           |                                 |                                          |  |
|                                            | 389 / 1000                                                                                                                                                                                                                                                                                                                                                                                                                                                            | <b>272 / 1000</b><br>(214 to 346)                                                                                                                                                                                                                                                                                                                                                                                                                                                                                                                                                                                                                                                                                                                                                                                                                                                                                                                                                                                                                                                                                                                                                                                                                                                                                                                                                                                                                                                                                                                                                                                                                                                                                                                                                                                                                                                                                                                                                                                                                                                                                                                                                                                                                                                                                                                                                                                                                                                                                                                                                                                                                                        | 117 fewer per 1000<br>(43 fewer to 175 fewer)                                               |                                  |                                 |               |          |                  |                  |          |                  |            |           |                  |                       |           |                  |          |                   |                        |                          |                          |               |            |                                   |                                               |                                  |            |                                   |                                              |            |                                   |                                               |                  |            |                                   |                                               |                                  |            |                                   |                                              |            |                                   |                                               |            |            |                                |                                             |                                  |           |                               |                                            |                       |            |                                   |                                            |                                  |           |                                 |                                          |  |
| 28-day mortality                           | 374 / 1000                                                                                                                                                                                                                                                                                                                                                                                                                                                            | <b>254 / 1000</b><br>(187 to 340)                                                                                                                                                                                                                                                                                                                                                                                                                                                                                                                                                                                                                                                                                                                                                                                                                                                                                                                                                                                                                                                                                                                                                                                                                                                                                                                                                                                                                                                                                                                                                                                                                                                                                                                                                                                                                                                                                                                                                                                                                                                                                                                                                                                                                                                                                                                                                                                                                                                                                                                                                                                                                                        | 120 fewer per 1000<br>(34 fewer to 187 fewer)                                               | <b>RR 0.68</b><br>(0.50 to 0.91) |                                 |               |          |                  |                  |          |                  |            |           |                  |                       |           |                  |          |                   |                        |                          |                          |               |            |                                   |                                               |                                  |            |                                   |                                              |            |                                   |                                               |                  |            |                                   |                                               |                                  |            |                                   |                                              |            |                                   |                                               |            |            |                                |                                             |                                  |           |                               |                                            |                       |            |                                   |                                            |                                  |           |                                 |                                          |  |
|                                            | 254 / 1000                                                                                                                                                                                                                                                                                                                                                                                                                                                            | <b>173 / 1000</b><br>(127 to 231)                                                                                                                                                                                                                                                                                                                                                                                                                                                                                                                                                                                                                                                                                                                                                                                                                                                                                                                                                                                                                                                                                                                                                                                                                                                                                                                                                                                                                                                                                                                                                                                                                                                                                                                                                                                                                                                                                                                                                                                                                                                                                                                                                                                                                                                                                                                                                                                                                                                                                                                                                                                                                                        | 81 fewer per 1000<br>(23 fewer to 127 fewer)                                                |                                  |                                 |               |          |                  |                  |          |                  |            |           |                  |                       |           |                  |          |                   |                        |                          |                          |               |            |                                   |                                               |                                  |            |                                   |                                              |            |                                   |                                               |                  |            |                                   |                                               |                                  |            |                                   |                                              |            |                                   |                                               |            |            |                                |                                             |                                  |           |                               |                                            |                       |            |                                   |                                            |                                  |           |                                 |                                          |  |
|                                            | 320 / 1000                                                                                                                                                                                                                                                                                                                                                                                                                                                            | <b>218 / 1000</b><br>(160 to 291)                                                                                                                                                                                                                                                                                                                                                                                                                                                                                                                                                                                                                                                                                                                                                                                                                                                                                                                                                                                                                                                                                                                                                                                                                                                                                                                                                                                                                                                                                                                                                                                                                                                                                                                                                                                                                                                                                                                                                                                                                                                                                                                                                                                                                                                                                                                                                                                                                                                                                                                                                                                                                                        | 102 fewer per 1000<br>(29 fewer to 160 fewer)                                               |                                  |                                 |               |          |                  |                  |          |                  |            |           |                  |                       |           |                  |          |                   |                        |                          |                          |               |            |                                   |                                               |                                  |            |                                   |                                              |            |                                   |                                               |                  |            |                                   |                                               |                                  |            |                                   |                                              |            |                                   |                                               |            |            |                                |                                             |                                  |           |                               |                                            |                       |            |                                   |                                            |                                  |           |                                 |                                          |  |
| Barotrauma                                 | 105 / 1000                                                                                                                                                                                                                                                                                                                                                                                                                                                            | <b>45 / 1000</b><br>(21 to 95)                                                                                                                                                                                                                                                                                                                                                                                                                                                                                                                                                                                                                                                                                                                                                                                                                                                                                                                                                                                                                                                                                                                                                                                                                                                                                                                                                                                                                                                                                                                                                                                                                                                                                                                                                                                                                                                                                                                                                                                                                                                                                                                                                                                                                                                                                                                                                                                                                                                                                                                                                                                                                                           | 60 fewer per 1000<br>(11 fewer to 84 fewer)                                                 | <b>RR 0.43</b><br>(0.20 to 0.90) |                                 |               |          |                  |                  |          |                  |            |           |                  |                       |           |                  |          |                   |                        |                          |                          |               |            |                                   |                                               |                                  |            |                                   |                                              |            |                                   |                                               |                  |            |                                   |                                               |                                  |            |                                   |                                              |            |                                   |                                               |            |            |                                |                                             |                                  |           |                               |                                            |                       |            |                                   |                                            |                                  |           |                                 |                                          |  |
|                                            | 33 / 1000                                                                                                                                                                                                                                                                                                                                                                                                                                                             | <b>14 / 1000</b><br>(7 to 30)                                                                                                                                                                                                                                                                                                                                                                                                                                                                                                                                                                                                                                                                                                                                                                                                                                                                                                                                                                                                                                                                                                                                                                                                                                                                                                                                                                                                                                                                                                                                                                                                                                                                                                                                                                                                                                                                                                                                                                                                                                                                                                                                                                                                                                                                                                                                                                                                                                                                                                                                                                                                                                            | 19 fewer per 1000<br>(3 fewer to 26 fewer)                                                  |                                  |                                 |               |          |                  |                  |          |                  |            |           |                  |                       |           |                  |          |                   |                        |                          |                          |               |            |                                   |                                               |                                  |            |                                   |                                              |            |                                   |                                               |                  |            |                                   |                                               |                                  |            |                                   |                                              |            |                                   |                                               |            |            |                                |                                             |                                  |           |                               |                                            |                       |            |                                   |                                            |                                  |           |                                 |                                          |  |
| ICU-acquired weakness                      | 215 / 1000                                                                                                                                                                                                                                                                                                                                                                                                                                                            | <b>243 / 1000</b><br>(165 to 359)                                                                                                                                                                                                                                                                                                                                                                                                                                                                                                                                                                                                                                                                                                                                                                                                                                                                                                                                                                                                                                                                                                                                                                                                                                                                                                                                                                                                                                                                                                                                                                                                                                                                                                                                                                                                                                                                                                                                                                                                                                                                                                                                                                                                                                                                                                                                                                                                                                                                                                                                                                                                                                        | 28 more per 1000<br>(49 fewer to 144 more)                                                  | <b>RR 1.13</b><br>(0.77 to 1.67) |                                 |               |          |                  |                  |          |                  |            |           |                  |                       |           |                  |          |                   |                        |                          |                          |               |            |                                   |                                               |                                  |            |                                   |                                              |            |                                   |                                               |                  |            |                                   |                                               |                                  |            |                                   |                                              |            |                                   |                                               |            |            |                                |                                             |                                  |           |                               |                                            |                       |            |                                   |                                            |                                  |           |                                 |                                          |  |
|                                            | 63 / 1000                                                                                                                                                                                                                                                                                                                                                                                                                                                             | <b>71 / 1000</b><br>(49 to 105)                                                                                                                                                                                                                                                                                                                                                                                                                                                                                                                                                                                                                                                                                                                                                                                                                                                                                                                                                                                                                                                                                                                                                                                                                                                                                                                                                                                                                                                                                                                                                                                                                                                                                                                                                                                                                                                                                                                                                                                                                                                                                                                                                                                                                                                                                                                                                                                                                                                                                                                                                                                                                                          | 8 more per 1000<br>(14 fewer to 42 more)                                                    |                                  |                                 |               |          |                  |                  |          |                  |            |           |                  |                       |           |                  |          |                   |                        |                          |                          |               |            |                                   |                                               |                                  |            |                                   |                                              |            |                                   |                                               |                  |            |                                   |                                               |                                  |            |                                   |                                              |            |                                   |                                               |            |            |                                |                                             |                                  |           |                               |                                            |                       |            |                                   |                                            |                                  |           |                                 |                                          |  |
|                                            | <p><b>Is there important uncertainty about or variability in how much people value the main outcomes?</b></p> <input type="radio"/> Important uncertainty or variability<br><input type="radio"/> Possibly important uncertainty or variability<br><input checked="" type="radio"/> Possibly no important uncertainty or variability<br><input type="radio"/> No important uncertainty or variability<br>-----<br><input type="radio"/> No known undesirable outcomes |                                                                                                                                                                                                                                                                                                                                                                                                                                                                                                                                                                                                                                                                                                                                                                                                                                                                                                                                                                                                                                                                                                                                                                                                                                                                                                                                                                                                                                                                                                                                                                                                                                                                                                                                                                                                                                                                                                                                                                                                                                                                                                                                                                                                                                                                                                                                                                                                                                                                                                                                                                                                                                                                          |                                                                                             |                                  |                                 |               |          |                  |                  |          |                  |            |           |                  |                       |           |                  |          |                   |                        |                          |                          |               |            |                                   |                                               |                                  |            |                                   |                                              |            |                                   |                                               |                  |            |                                   |                                               |                                  |            |                                   |                                              |            |                                   |                                               |            |            |                                |                                             |                                  |           |                               |                                            |                       |            |                                   |                                            |                                  |           |                                 |                                          |  |
|                                            | <p><b>How substantial are the desirable anticipated effects?</b></p> <input type="radio"/> Trivial<br><input type="radio"/> Small<br><input checked="" type="radio"/> Moderate<br><input type="radio"/> Large<br>-----<br><input type="radio"/> Varies<br><input type="radio"/> Don't know                                                                                                                                                                            |                                                                                                                                                                                                                                                                                                                                                                                                                                                                                                                                                                                                                                                                                                                                                                                                                                                                                                                                                                                                                                                                                                                                                                                                                                                                                                                                                                                                                                                                                                                                                                                                                                                                                                                                                                                                                                                                                                                                                                                                                                                                                                                                                                                                                                                                                                                                                                                                                                                                                                                                                                                                                                                                          |                                                                                             |                                  |                                 |               |          |                  |                  |          |                  |            |           |                  |                       |           |                  |          |                   |                        |                          |                          |               |            |                                   |                                               |                                  |            |                                   |                                              |            |                                   |                                               |                  |            |                                   |                                               |                                  |            |                                   |                                              |            |                                   |                                               |            |            |                                |                                             |                                  |           |                               |                                            |                       |            |                                   |                                            |                                  |           |                                 |                                          |  |
|                                            | <p><b>How substantial are the undesirable anticipated effects?</b></p> <input type="radio"/> Large<br><input type="radio"/> Moderate<br><input checked="" type="radio"/> Small<br><input type="radio"/> Trivial<br>-----<br><input type="radio"/> Varies<br><input type="radio"/> Don't know                                                                                                                                                                          |                                                                                                                                                                                                                                                                                                                                                                                                                                                                                                                                                                                                                                                                                                                                                                                                                                                                                                                                                                                                                                                                                                                                                                                                                                                                                                                                                                                                                                                                                                                                                                                                                                                                                                                                                                                                                                                                                                                                                                                                                                                                                                                                                                                                                                                                                                                                                                                                                                                                                                                                                                                                                                                                          |                                                                                             |                                  |                                 |               |          |                  |                  |          |                  |            |           |                  |                       |           |                  |          |                   |                        |                          |                          |               |            |                                   |                                               |                                  |            |                                   |                                              |            |                                   |                                               |                  |            |                                   |                                               |                                  |            |                                   |                                              |            |                                   |                                               |            |            |                                |                                             |                                  |           |                               |                                            |                       |            |                                   |                                            |                                  |           |                                 |                                          |  |
|                                            | <p><b>Does the balance between desirable effects and undesirable effects favor</b></p> <input type="radio"/> Favors the comparison<br><input type="radio"/> Probably favors the comparison<br><input type="radio"/> Does not favor either                                                                                                                                                                                                                             |                                                                                                                                                                                                                                                                                                                                                                                                                                                                                                                                                                                                                                                                                                                                                                                                                                                                                                                                                                                                                                                                                                                                                                                                                                                                                                                                                                                                                                                                                                                                                                                                                                                                                                                                                                                                                                                                                                                                                                                                                                                                                                                                                                                                                                                                                                                                                                                                                                                                                                                                                                                                                                                                          | Complications associated with the use of neuromuscular blockers include the following three |                                  |                                 |               |          |                  |                  |          |                  |            |           |                  |                       |           |                  |          |                   |                        |                          |                          |               |            |                                   |                                               |                                  |            |                                   |                                              |            |                                   |                                               |                  |            |                                   |                                               |                                  |            |                                   |                                              |            |                                   |                                               |            |            |                                |                                             |                                  |           |                               |                                            |                       |            |                                   |                                            |                                  |           |                                 |                                          |  |



## CQ9: Should neuromuscular blocking agents be used in adult patients with ARDS requiring mechanical ventilation?

POPULATION : ADULT PATIENTS WITH MODERATE TO SEVERE ARDS WITHIN 48 HOURS OF ONSET

INTERVENTION : NEUROMUSCULAR BLOCKING AGENT (CISATRACRIUM) FOR 48-HOUR INFUSION

| CRITERIA                             | JUDGEMENTS                                                                                                                                                                                                                                                                                                                                                                                                                                                                                | RESEARCH EVIDENCE                                                                                                                                                                                                                                                                                    | ADDITIONAL CONSIDERATIONS                                                                                                         |
|--------------------------------------|-------------------------------------------------------------------------------------------------------------------------------------------------------------------------------------------------------------------------------------------------------------------------------------------------------------------------------------------------------------------------------------------------------------------------------------------------------------------------------------------|------------------------------------------------------------------------------------------------------------------------------------------------------------------------------------------------------------------------------------------------------------------------------------------------------|-----------------------------------------------------------------------------------------------------------------------------------|
| <b>the option or the comparison?</b> | the intervention or the comparison<br><input checked="" type="radio"/> Probably favors the intervention<br><input type="radio"/> Favors the intervention<br>-----<br><input type="radio"/> Varies<br><input type="radio"/> Don't know                                                                                                                                                                                                                                                     | <b>Summary:</b> The use of neuromuscular blockers reduces the risk of ICU mortality, 28-day mortality and barotrauma. However, no correlation was observed between the use of neuromuscular blockers and the development of ICU-acquired weakness.                                                   | classifications: polyneuropathy, polymyopathy and neuromyopathy. In addition, DVT, corneal injury and anaphylaxis may also occur. |
| <b>RESOURCE USE</b>                  | <b>How large are the resource requirements (costs)?</b><br><input type="radio"/> Large costs<br><input checked="" type="radio"/> Moderate costs<br><input type="radio"/> Negligible costs and savings<br><input type="radio"/> Moderate savings<br><input type="radio"/> Large savings<br>-----<br><input type="radio"/> Varies<br><input type="radio"/> Don't know                                                                                                                       | The medication is continuously delivered via peripheral vein. The required amount of materials is limited and the daily cost of medication is projected to be in the range of a few thousand yen.                                                                                                    |                                                                                                                                   |
|                                      | <b>Does the cost effectiveness of the option favor the option or the comparison?</b><br><input type="radio"/> Favors the comparison<br><input type="radio"/> Probably favors the comparison<br><input type="radio"/> Does not favor either the intervention or the comparison<br><input checked="" type="radio"/> Probably favors the intervention<br><input type="radio"/> Favors the intervention<br>-----<br><input type="radio"/> Varies<br><input type="radio"/> No included studies | The costs incurred for purchase of required materials and medications are roughly equivalent to that of similar medications (i.e. sedatives).                                                                                                                                                        |                                                                                                                                   |
| <b>EQUITY</b>                        | <input type="radio"/> Reduced<br><input checked="" type="radio"/> Probably reduced<br><input type="radio"/> Probably no impact<br><input type="radio"/> Probably increased<br><input type="radio"/> Increased<br>-----<br><input type="radio"/> Varies<br><input type="radio"/> Don't know                                                                                                                                                                                                | The use of the medication in question does not require special medical facilities/equipment and therefore its overall influence upon patient equality is expected to be universally negligible. However, cisatracrium is not available in Japan and therefore this must be taken into consideration. |                                                                                                                                   |

## CQ9: Should neuromuscular blocking agents be used in adult patients with ARDS requiring mechanical ventilation?

POPULATION : ADULT PATIENTS WITH MODERATE TO SEVERE ARDS WITHIN 48 HOURS OF ONSET

INTERVENTION : NEUROMUSCULAR BLOCKING AGENT (CISATRACRIUM) FOR 48-HOUR INFUSION

| CRITERIA             |                                                      | JUDGEMENTS                                                                                                                                                                                                               | RESEARCH EVIDENCE                                                                                                                           | ADDITIONAL CONSIDERATION |
|----------------------|------------------------------------------------------|--------------------------------------------------------------------------------------------------------------------------------------------------------------------------------------------------------------------------|---------------------------------------------------------------------------------------------------------------------------------------------|--------------------------|
| <b>ACCEPTABILITY</b> | <b>Is the option acceptable to key stakeholders?</b> | <input type="radio"/> No<br><input type="radio"/> Probably no<br><input checked="" type="radio"/> Probably yes<br><input type="radio"/> Yes<br>-----<br><input type="radio"/> Varies<br><input type="radio"/> Don't know | There are no apparent disadvantages to the primary stakeholder and therefore the present option can be expected to be readily accepted.     |                          |
| <b>FEASIBILITY</b>   | <b>Is the option feasible to implement?</b>          | <input type="radio"/> No<br><input type="radio"/> Probably no<br><input checked="" type="radio"/> Probably yes<br><input type="radio"/> Yes<br>-----<br><input type="radio"/> Varies<br><input type="radio"/> Don't know | The use of the medication in question does not require special medical facilities/equipment and is therefore appropriate for practical use. |                          |

## Recommendation

## CQ9: Should neuromuscular blocking agents be used in adult patients with ARDS requiring mechanical ventilation?

| Balance of consequences | Undesirable consequences <i>clearly outweigh</i> desirable consequences in most settings | Undesirable consequences <i>probably outweigh</i> desirable consequences in most settings | The balance between desirable and undesirable consequences is closely <i>balanced or uncertain</i> | Desirable consequences <i>probably outweigh</i> undesirable consequences in most settings | Desirable consequences <i>clearly outweigh</i> undesirable consequences in most settings |
|-------------------------|------------------------------------------------------------------------------------------|-------------------------------------------------------------------------------------------|----------------------------------------------------------------------------------------------------|-------------------------------------------------------------------------------------------|------------------------------------------------------------------------------------------|
| Judgement               | ○                                                                                        | ○                                                                                         | ○                                                                                                  | ●                                                                                         | ○                                                                                        |

| Type of recommendation | Strong recommendation against the intervention | Conditional recommendation against the intervention | Conditional recommendation for either the intervention or the comparison | Conditional recommendation for the intervention |
|------------------------|------------------------------------------------|-----------------------------------------------------|--------------------------------------------------------------------------|-------------------------------------------------|
| Judgement              | ○                                              | ○                                                   | ●                                                                        | ○                                               |

|                       |                                                                                                                                                                                                                                                                                                                                                                                                                                                                                                                                                                                                                                                                                                                                                                                                                                                                                                                                                                                                                                                                                                                                                                                                                                                                                                                                                                                                                                                                                                                                                                                                                                                                                                                                                                                                                                                                                                                                                                                                                                                                                                                                                                                                                                                                                                                                                                                                        |
|-----------------------|--------------------------------------------------------------------------------------------------------------------------------------------------------------------------------------------------------------------------------------------------------------------------------------------------------------------------------------------------------------------------------------------------------------------------------------------------------------------------------------------------------------------------------------------------------------------------------------------------------------------------------------------------------------------------------------------------------------------------------------------------------------------------------------------------------------------------------------------------------------------------------------------------------------------------------------------------------------------------------------------------------------------------------------------------------------------------------------------------------------------------------------------------------------------------------------------------------------------------------------------------------------------------------------------------------------------------------------------------------------------------------------------------------------------------------------------------------------------------------------------------------------------------------------------------------------------------------------------------------------------------------------------------------------------------------------------------------------------------------------------------------------------------------------------------------------------------------------------------------------------------------------------------------------------------------------------------------------------------------------------------------------------------------------------------------------------------------------------------------------------------------------------------------------------------------------------------------------------------------------------------------------------------------------------------------------------------------------------------------------------------------------------------------|
| <b>Recommendation</b> | <p><b>We suggest the use of neuromuscular blocking agents (NMBAs) in adult patients with ARDS requiring mechanical ventilation, under certain circumstances. (GRADE 2B, Strength of recommendation “weak recommendation” / Quality of evidence “moderate”)</b></p> <p><b>Supplementary conditions:</b> The routine use of NMBAs should be avoided. Their use would be justified only if the Berlin definition of ARDS is fulfilled for patients with moderate or severe ARDS (P/F<math>\leq</math>200 on PEEP of <math>\geq</math>5cmH<sub>2</sub>O). We would also limit their use to less than 48 hours in the early phase of the disease. The NMBAs currently available in Japan have some risks for causing myopathy. In particular, the concurrent use of steroids increases the risk, which should be taken into account {Adnet, 2001 #132;Behbehani, 1999 #133;Leatherman, 1996 #134}. NMBAs are generally categorized into depolarizing agents and non-depolarizing agents based on their pharmacologic mechanism. Compared to non-depolarizing agents, depolarizing agents have more side effects such as myalgia, hyperkalemia, and elevated intracranial pressure. Therefore, non-depolarizing agents are preferable in clinical practice. Non-depolarizing NMBAs are further classified into aminosteroids (Rocuronium, Vecuronium, Pancuronium) and benzylisoquinolines (Atracurium, Cisatracurium, Mivacurium) on the basis of their chemical structure. Cisatracurium, which was used in all three RCTs analyzed in this systematic review, is not available in Japan. Rocuronium or vecuronium are alternatives. However, special consideration is required. While the metabolism of benzylisoquinolines such as cisatracurium is not influenced by hepatic or renal function, the metabolism of aminosteroids such as rocuronium or vecuronium is delayed in patients with hepatic or renal dysfunction. In addition, attention needs to be paid to the risk of muscular atrophy due to aminosteroid use. There was a suggestion given by one of the panelists that the routine use of NMBAs should not be recommended because NMBAs currently available in Japan may increase the risk of myopathy. After extensive discussion among the panelists, agreement was reached to make a weak recommendation for their use under certain circumstances, as described in the comments.</p> |
| <b>Justification</b>  | <p><b>Clinical question:</b> Should neuromuscular blocking agents be used in adult patients with ARDS requiring mechanical ventilation?</p> <p><b>Patient or population:</b> Adult patients with moderate to severe ARDS within 48 hours of onset</p> <p><b>Intervention:</b> Neuromuscular blocking agent (Cisatracurium) for 48-hour infusion</p> <p><b>Comparison:</b> Placebo</p> <p><b>Outcomes:</b> ICU mortality, 28-day mortality, barotrauma, ICU-acquired weakness</p> <p><b>Summary of the evidence:</b> All three RCTs analyzed in this systematic review were conducted by the same French group which studied the efficacy of NMBAs in adult patients with ARDS requiring mechanical ventilation {Forel, 2006 #127;Gainnier, 2004 #128;Papazian, 2010 #129}. All cohorts fulfilled the criterion of having moderate or severe ARDS (P/F<math>\leq</math>200 on PEEP of <math>\geq</math>5cmH<sub>2</sub>O) based on the Berlin definition. NMBA use was limited to less than 48 hours from the onset of the disease. Meta-analysis of these 3 RCTs (total 431 patients) demonstrated that the ICU mortality, 28-day mortality, and the rate of barotrauma are significantly lower in the NMBA group compared to the control group (ICU mortality: RR 0.70, 95%CI 0.55-0.89; 28-day mortality: RR 0.68, 95%CI 0.50-0.91; the rate of barotrauma: RR 0.43. 95% CI 0.20-0.90). There is no statistically significant difference between the two groups regarding the occurrence of myopathy due to NMBA use.</p>                                                                                                                                                                                                                                                                                                                                                                                                                                                                                                                                                                                                                                                                                                                                                                                                                                                                            |

|                                                 |                                                                                                                                                                                                                                                                                                                                                                                                                                                                                                                                                                                                                                                                                                                                                                                                                                                                                                                                                                                                                                                                                                                                                                                                                                                                                                                                                                                                                                                                                                                                                                                                                                                                                                                                                                                                                                                                                                                                                                                                                                                                                                                                                                                                                                                                                                                                                                                                                                                                                                                                                                                                                                                                                                                                                                                                                                                                                                                                                                                                                                                                                                                                                                                                                                                                                                                                                                                                                                                                                                                                                                                                                                                                                                                                                                                                        |
|-------------------------------------------------|--------------------------------------------------------------------------------------------------------------------------------------------------------------------------------------------------------------------------------------------------------------------------------------------------------------------------------------------------------------------------------------------------------------------------------------------------------------------------------------------------------------------------------------------------------------------------------------------------------------------------------------------------------------------------------------------------------------------------------------------------------------------------------------------------------------------------------------------------------------------------------------------------------------------------------------------------------------------------------------------------------------------------------------------------------------------------------------------------------------------------------------------------------------------------------------------------------------------------------------------------------------------------------------------------------------------------------------------------------------------------------------------------------------------------------------------------------------------------------------------------------------------------------------------------------------------------------------------------------------------------------------------------------------------------------------------------------------------------------------------------------------------------------------------------------------------------------------------------------------------------------------------------------------------------------------------------------------------------------------------------------------------------------------------------------------------------------------------------------------------------------------------------------------------------------------------------------------------------------------------------------------------------------------------------------------------------------------------------------------------------------------------------------------------------------------------------------------------------------------------------------------------------------------------------------------------------------------------------------------------------------------------------------------------------------------------------------------------------------------------------------------------------------------------------------------------------------------------------------------------------------------------------------------------------------------------------------------------------------------------------------------------------------------------------------------------------------------------------------------------------------------------------------------------------------------------------------------------------------------------------------------------------------------------------------------------------------------------------------------------------------------------------------------------------------------------------------------------------------------------------------------------------------------------------------------------------------------------------------------------------------------------------------------------------------------------------------------------------------------------------------------------------------------------------------|
|                                                 | <p><b>Quality of the evidence:</b> All three RCTs demonstrated that the NMBA-treated groups had a consistent, significant improvement in mortality compared to control groups [Forel, 2006 #127;Gainnier, 2004 #128;Papazian, 2010 #129]. The statistical significance was also confirmed by meta-analysis (<math>I^2=0\%</math> in all outcomes). Although complete concealment of the study drug was not possible due to its pharmacologic characteristics, the possibility of other risk of biases was considered to be low. There was no major issue in selection of the study population or outcome measurement. However, the level of recommendation was downgraded, because cisatracurium, used in these three RCTs, is currently not available in Japan, and as a result, indirectness of these studies is considered serious. The ICU mortality and 28-day mortality were 163/431 (38%) and 123/395 (31%), respectively, and the number of events was considered sufficient to provide precise effect estimates. We need a special caution here for the following reasons before interpreting the results. First, all three RCTs analyzed in this meta-analysis were conducted by the same French study group. Second, the Papazian 2010 study enrolled a much larger cohort compared to the other studies [Papazian, 2010 #129]. As a result, this study might have a disproportionate impact on the results. The number of patients with barotrauma and myopathy was either quite low or not assessed in the other two RCTs. Therefore, when all three RCTs are compared to the Papazian study alone, the outcomes are similar.</p> <p><b>Judgement of benefit and harm, resources and cost:</b> Since a certain degree of benefit is expected with NMBAs, use without serious complications, treatment with NMBAs will be accepted by most patients. However, we recognize that cisatracurium, the drug used in the RCTs, is not available in Japan.</p> <p><b>Recommendations:</b> We suggest the use of neuromuscular blocking agents (NMBAs) in adult patients with ARDS requiring mechanical ventilation, under certain circumstances. (GRADE 2B, Strength of recommendation "weak recommendation" / Quality of evidence "moderate")</p> <p><b>Additional considerations:</b> NMBAs are generally categorized into depolarizing agents and non-depolarizing agents based on their pharmacologic mechanism. Compared to non-depolarizing agents, depolarizing agents have more side effects such as myalgia, hyperkalemia, and elevated intracranial pressure. Therefore, non-depolarizing agents are preferable in clinical practice. Non-depolarizing NMBAs are further classified into aminosteroids (Rocuronium, Vecuronium, Pancuronium) and benzylisoquinolines (Atracurium, Cisatracurium, Mivacurium) on the basis of their chemical structure. Cisatracurium, which was used in all three RCTs analyzed in this systematic review, is not available in Japan. Rocuronium or vecuronium are alternatives. However, special consideration is required. While the metabolism of benzylisoquinolines such as cisatracurium is not influenced by hepatic or renal function, the metabolism of aminosteroids such as rocuronium or vecuronium is delayed in patients with hepatic or renal dysfunction. In addition, attention needs to be paid to the risk of muscular atrophy due to aminosteroid use. There was a suggestion given by one of the panelists that the routine use of NMBAs should not be recommended because NMBAs currently available in Japan may increase the risk of myopathy. After extensive discussion among the panelists, agreement was reached to make a weak recommendation for their use under certain circumstances, as described in the comments.</p> |
| <b>Subgroup considerations</b>                  | According to the severity of ARDS in the Berlin definition, recommendation for the efficacy of NMBAs may be changed.                                                                                                                                                                                                                                                                                                                                                                                                                                                                                                                                                                                                                                                                                                                                                                                                                                                                                                                                                                                                                                                                                                                                                                                                                                                                                                                                                                                                                                                                                                                                                                                                                                                                                                                                                                                                                                                                                                                                                                                                                                                                                                                                                                                                                                                                                                                                                                                                                                                                                                                                                                                                                                                                                                                                                                                                                                                                                                                                                                                                                                                                                                                                                                                                                                                                                                                                                                                                                                                                                                                                                                                                                                                                                   |
| <b>Implementation considerations</b>            | Cisatracurium, which was used in all three RCTs analyzed in this systematic review, is not available in Japan. Adoption of cisatracurium in Japan is expected in the near future.                                                                                                                                                                                                                                                                                                                                                                                                                                                                                                                                                                                                                                                                                                                                                                                                                                                                                                                                                                                                                                                                                                                                                                                                                                                                                                                                                                                                                                                                                                                                                                                                                                                                                                                                                                                                                                                                                                                                                                                                                                                                                                                                                                                                                                                                                                                                                                                                                                                                                                                                                                                                                                                                                                                                                                                                                                                                                                                                                                                                                                                                                                                                                                                                                                                                                                                                                                                                                                                                                                                                                                                                                      |
| <b>Monitoring and evaluation considerations</b> | Respiratory and circulatory monitoring, neuromuscular monitoring with train-of-four (TOF) stimulation, and sedative monitoring (BIS®: Bispectral Index) are necessary to evaluate the adequacy of neuromuscular blockade.                                                                                                                                                                                                                                                                                                                                                                                                                                                                                                                                                                                                                                                                                                                                                                                                                                                                                                                                                                                                                                                                                                                                                                                                                                                                                                                                                                                                                                                                                                                                                                                                                                                                                                                                                                                                                                                                                                                                                                                                                                                                                                                                                                                                                                                                                                                                                                                                                                                                                                                                                                                                                                                                                                                                                                                                                                                                                                                                                                                                                                                                                                                                                                                                                                                                                                                                                                                                                                                                                                                                                                              |
| <b>Research possibilities</b>                   | For patients who fulfill the Berlin definition for mild ARDS, the safety and efficacy of cisatracurium, as well as vecuronium, pancuronium, and rocuronium need to be assessed in further clinical trials.                                                                                                                                                                                                                                                                                                                                                                                                                                                                                                                                                                                                                                                                                                                                                                                                                                                                                                                                                                                                                                                                                                                                                                                                                                                                                                                                                                                                                                                                                                                                                                                                                                                                                                                                                                                                                                                                                                                                                                                                                                                                                                                                                                                                                                                                                                                                                                                                                                                                                                                                                                                                                                                                                                                                                                                                                                                                                                                                                                                                                                                                                                                                                                                                                                                                                                                                                                                                                                                                                                                                                                                             |

## References

## CQ10. Study flow diagram

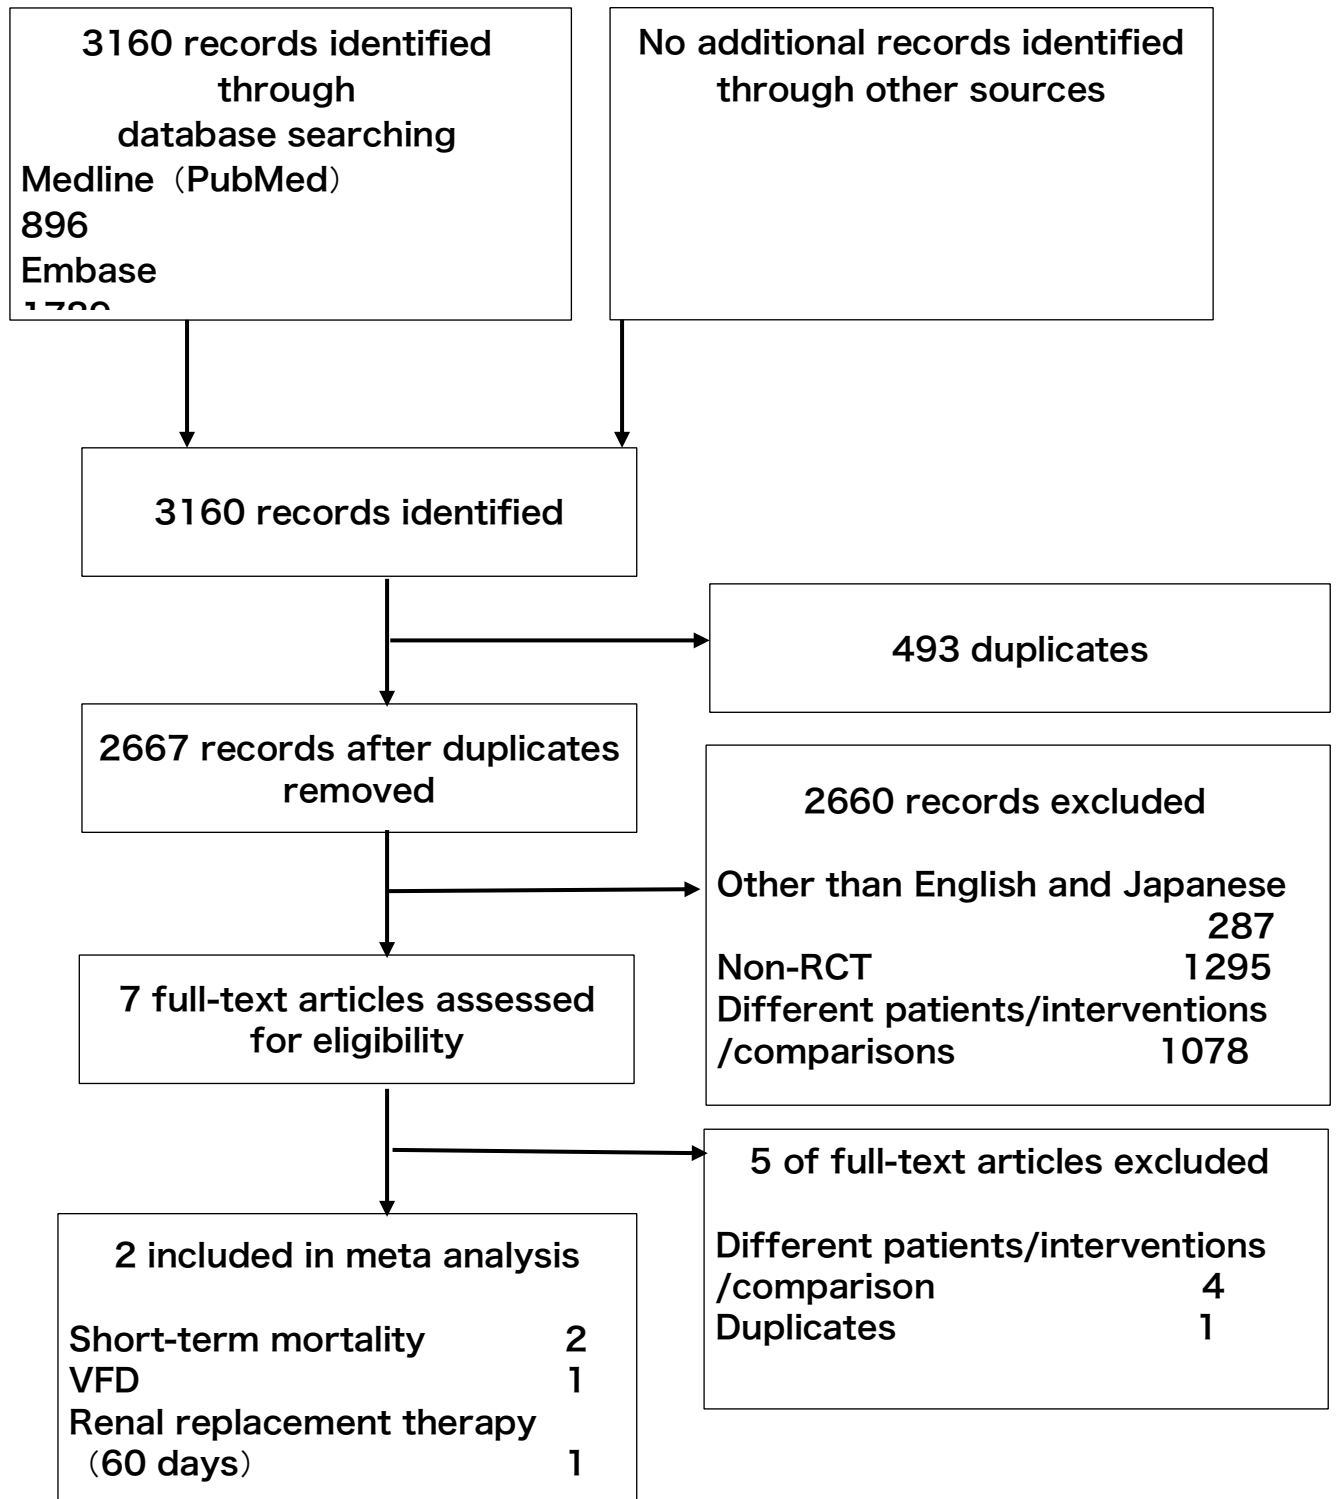

| Outcome                                   |                               | Short term mortality                      |                                          | risk of bias                              |                                            | not serious (0)                         |                                              |                                   |                                              |
|-------------------------------------------|-------------------------------|-------------------------------------------|------------------------------------------|-------------------------------------------|--------------------------------------------|-----------------------------------------|----------------------------------------------|-----------------------------------|----------------------------------------------|
| 番号                                        | 著者名 発表年<br>(Forest plot表示)    | risk of bias評価                            |                                          |                                           |                                            |                                         |                                              |                                   |                                              |
|                                           |                               | ランダム割付順序の生成<br>random sequence generation | 割り付けの隠蔽化<br>allocation concealment       | ブラインド<br>blinding                         |                                            | 不完全なアウトカムデータ<br>incomplete outcome data | 選択されたアウトカムの報告<br>selective outcome reporting | その他のバイアス<br>Other sources of bias | 研究内でのバイアスのリスク<br>Risk of bias within a study |
| 研究参加者と治療提供者<br>participants and personnel | アウトカム評価者<br>outcome assessors |                                           |                                          |                                           |                                            |                                         |                                              |                                   |                                              |
| 1                                         | FACTT 2006                    | Low risk                                  | Low risk                                 | High risk                                 | Low risk                                   | Low risk                                | Low risk                                     | Low risk                          | Low risk                                     |
| 2                                         | Martin 2002                   | Low risk                                  | Low risk                                 | Low risk                                  | Low risk                                   | Low risk                                | Unclear risk                                 | Low risk                          | Low risk                                     |
|                                           |                               |                                           |                                          |                                           |                                            |                                         |                                              |                                   |                                              |
| 番号                                        | 著者名 発表年<br>(Forest plot表示)    | risk of biasコメント                          |                                          |                                           |                                            |                                         |                                              |                                   |                                              |
| 1                                         | FACTT 2006                    | 自動システムを用いたランダム化を行った                       | 自動システムを用いて8個のブロックに分けているため、隠蔽化できていると判断した  | ブラインド化できていない                              | ブラインド化できていないが、死亡の判定には影響なし                  | 比較群で1例のみ解析から除外された                       | 100%報告された                                    | 研究の中断はなく、他のバイアスも指摘できなかった          | Low riskの項目が多いため                             |
| 2                                         | Martin 2002                   | コンピューターを用いてランダム化している                      | 各施設に割り付けとブラインド化を担当する薬剤師がおり、隠蔽化されていると判断した | 上記薬剤師により治験薬とプラセボが管理されており、ブラインド化されていると判断した | 上記によりブラインド化できていると考えられる上に、ブラインド化の有無で結果に影響なし | 100%報告された                               | 事前に計画されたプロトコルが閲覧できなかった                       | 研究の中断なし                           | Low riskの項目が多いため                             |

| Outcome                                   |                               | VFD                                       | risk of bias                            |                   | not serious (0)                                                            |                                         |                                              |                                   |                                              |
|-------------------------------------------|-------------------------------|-------------------------------------------|-----------------------------------------|-------------------|----------------------------------------------------------------------------|-----------------------------------------|----------------------------------------------|-----------------------------------|----------------------------------------------|
| 番号                                        | 著者名 発表年<br>(Forest plot表示)    | risk of bias評価                            |                                         |                   |                                                                            |                                         |                                              |                                   |                                              |
|                                           |                               | ランダム割付順番の生成<br>random sequence generation | 割り付けの隠蔽化<br>allocation concealment      | ブラインド<br>blinding |                                                                            | 不完全なアウトカムデータ<br>incomplete outcome data | 選択されたアウトカムの報告<br>selective outcome reporting | その他のバイアス<br>Other sources of bias | 研究内でのバイアスのリスク<br>Risk of bias within a study |
| 研究参加者と治療提供者<br>participants and personnel | アウトカム評価者<br>outcome assessors |                                           |                                         |                   |                                                                            |                                         |                                              |                                   |                                              |
| 1                                         | FACTT 2006                    | Low risk                                  | Low risk                                | High risk         | Unclear risk                                                               | Low risk                                | Low risk                                     | Low risk                          | Low risk                                     |
|                                           |                               |                                           |                                         |                   |                                                                            |                                         |                                              |                                   |                                              |
| 番号                                        | 著者名 発表年<br>(Forest plot表示)    | risk of biasコメント                          |                                         |                   |                                                                            |                                         |                                              |                                   |                                              |
| 1                                         | FACTT 2006                    | 自動システムを用いたランダム化を行った                       | 自動システムを用いて8個のブロックに分けているため、隠蔽化できていると判断した | ブラインド化できていない      | ブラインド化できていないが、CVP測定は呼吸終末に仰臥位で行っていたため、アウトカム評価者がどちらの群が容易に分からないと判断しUnclearとした | 比較群で1例のみ解析から除外された                       | 100%報告された                                    | 研究の中断はなく、他のバイアスも指摘できなかった          | Low riskの項目が多いため                             |

| Outcome                                   |                               | Renal replacement therapy                 |                                         | risk of bias      |                                                                            | not serious (0)                         |                                              |                                   |                                              |
|-------------------------------------------|-------------------------------|-------------------------------------------|-----------------------------------------|-------------------|----------------------------------------------------------------------------|-----------------------------------------|----------------------------------------------|-----------------------------------|----------------------------------------------|
| 番号                                        | 著者名 発表年<br>(Forest plot表示)    | risk of bias評価                            |                                         |                   |                                                                            |                                         |                                              |                                   |                                              |
|                                           |                               | ランダム割付順序の生成<br>random sequence generation | 割り付けの隠蔽化<br>allocation concealment      | ブラインド<br>blinding |                                                                            | 不完全なアウトカムデータ<br>incomplete outcome data | 選択されたアウトカムの報告<br>selective outcome reporting | その他のバイアス<br>Other sources of bias | 研究内でのバイアスのリスク<br>Risk of bias within a study |
| 研究参加者と治療提供者<br>participants and personnel | アウトカム評価者<br>outcome assessors |                                           |                                         |                   |                                                                            |                                         |                                              |                                   |                                              |
| 1                                         | FACTT 2006                    | Low risk                                  | Low risk                                | High risk         | Unclear risk                                                               | Low risk                                | Low risk                                     | Low risk                          | Low risk                                     |
|                                           |                               |                                           |                                         |                   |                                                                            |                                         |                                              |                                   |                                              |
| 番号                                        | 著者名 発表年<br>(Forest plot表示)    | risk of biasコメント                          |                                         |                   |                                                                            |                                         |                                              |                                   |                                              |
| 1                                         | FACTT 2006                    | 自動システムを用いたランダム化を行った                       | 自動システムを用いて8個のブロックに分けているため、隠蔽化できていると判断した | ブラインド化できていない      | ブラインド化できていないが、CVP測定は呼吸終末に仰臥位で行っていたため、アウトカム評価者がどちらの群か容易に分かれないと判断しUnclearとした | 比較群で1例のみ解析から除外された                       | 100%報告された                                    | 研究の中断はなく、他のバイアスも指摘できなかった          | Low riskの項目が多いため                             |



## Short term mortality

|             | Random sequence generation (selection bias) | Allocation concealment (selection bias) | Blinding of participants and personnel (performance bias) | Blinding of outcome assessment (detection bias) | Incomplete outcome data (attrition bias) | Selective reporting (reporting bias) | Other bias |
|-------------|---------------------------------------------|-----------------------------------------|-----------------------------------------------------------|-------------------------------------------------|------------------------------------------|--------------------------------------|------------|
| FACTT 2006  | +                                           | +                                       | -                                                         | +                                               | +                                        | +                                    | +          |
| Martin 2002 | +                                           | +                                       | +                                                         | +                                               | +                                        | ?                                    | +          |

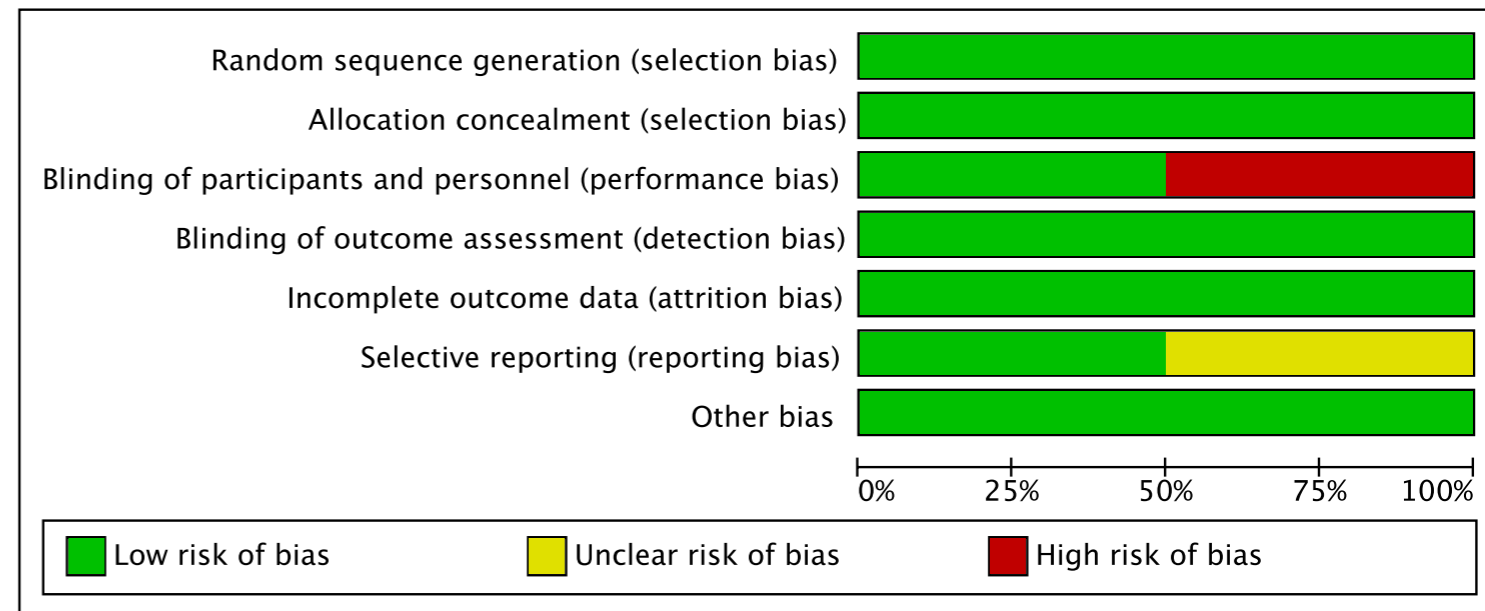

VFD

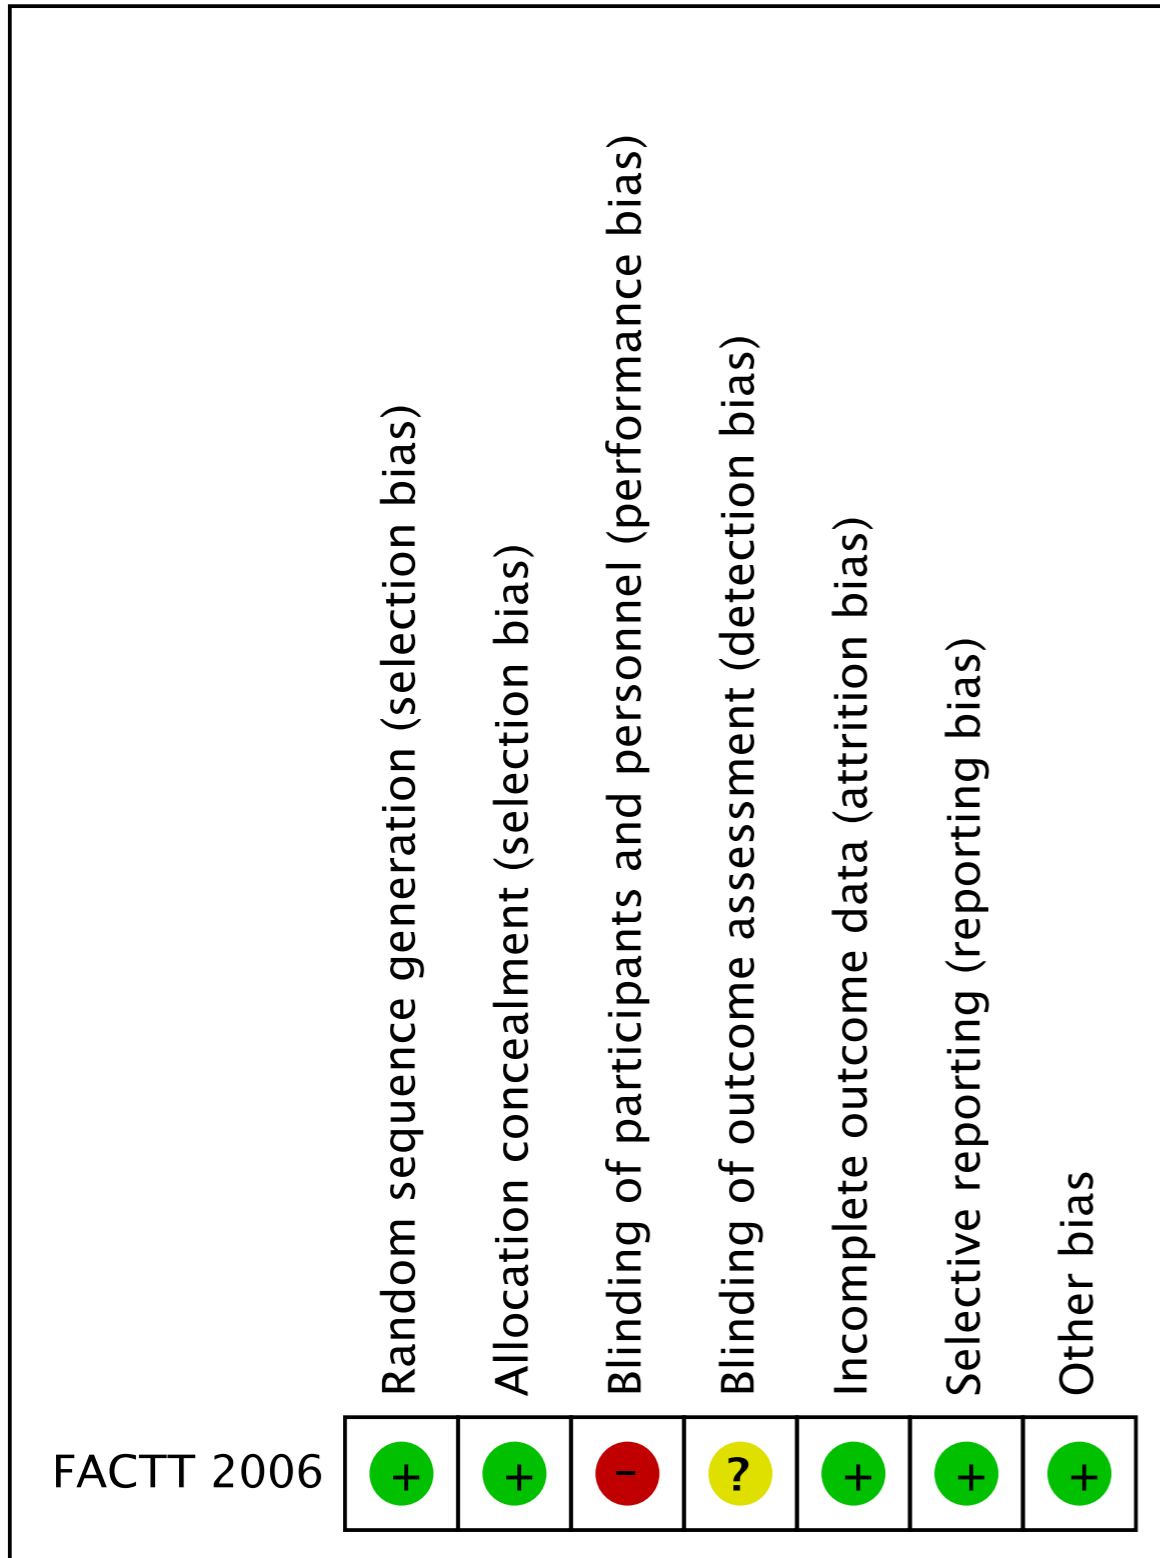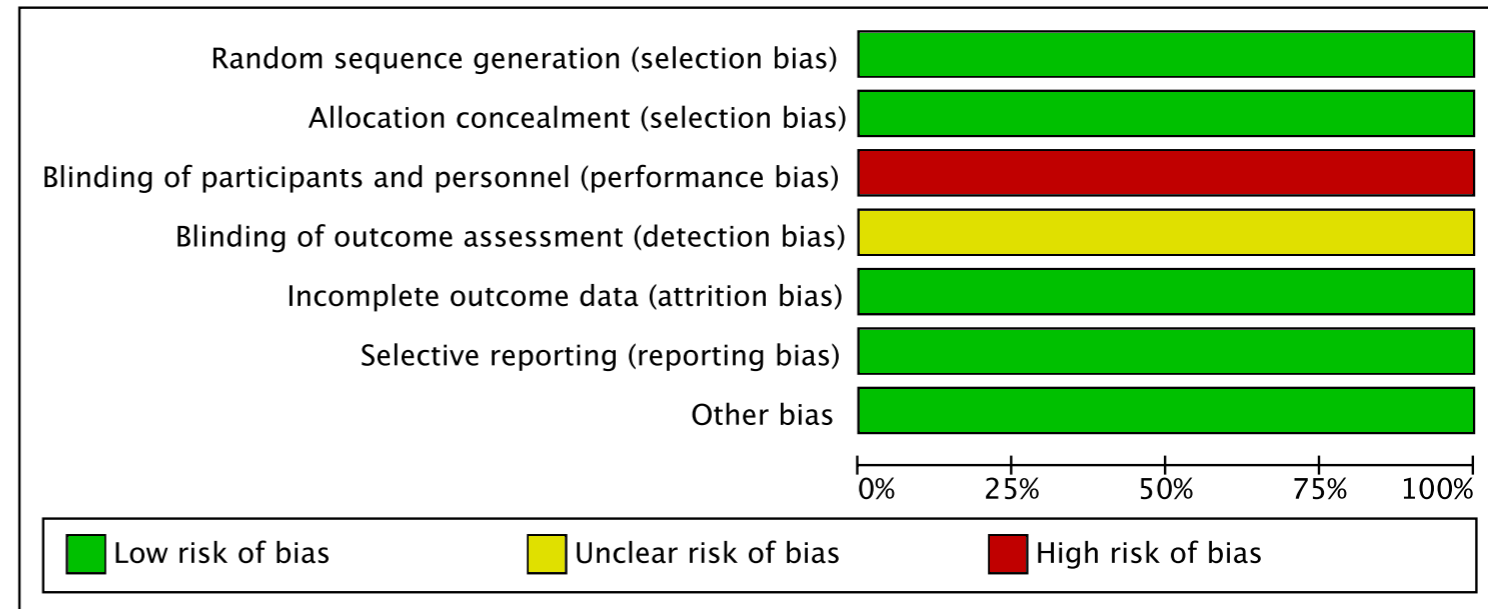

## Renal replacemnt Therapy

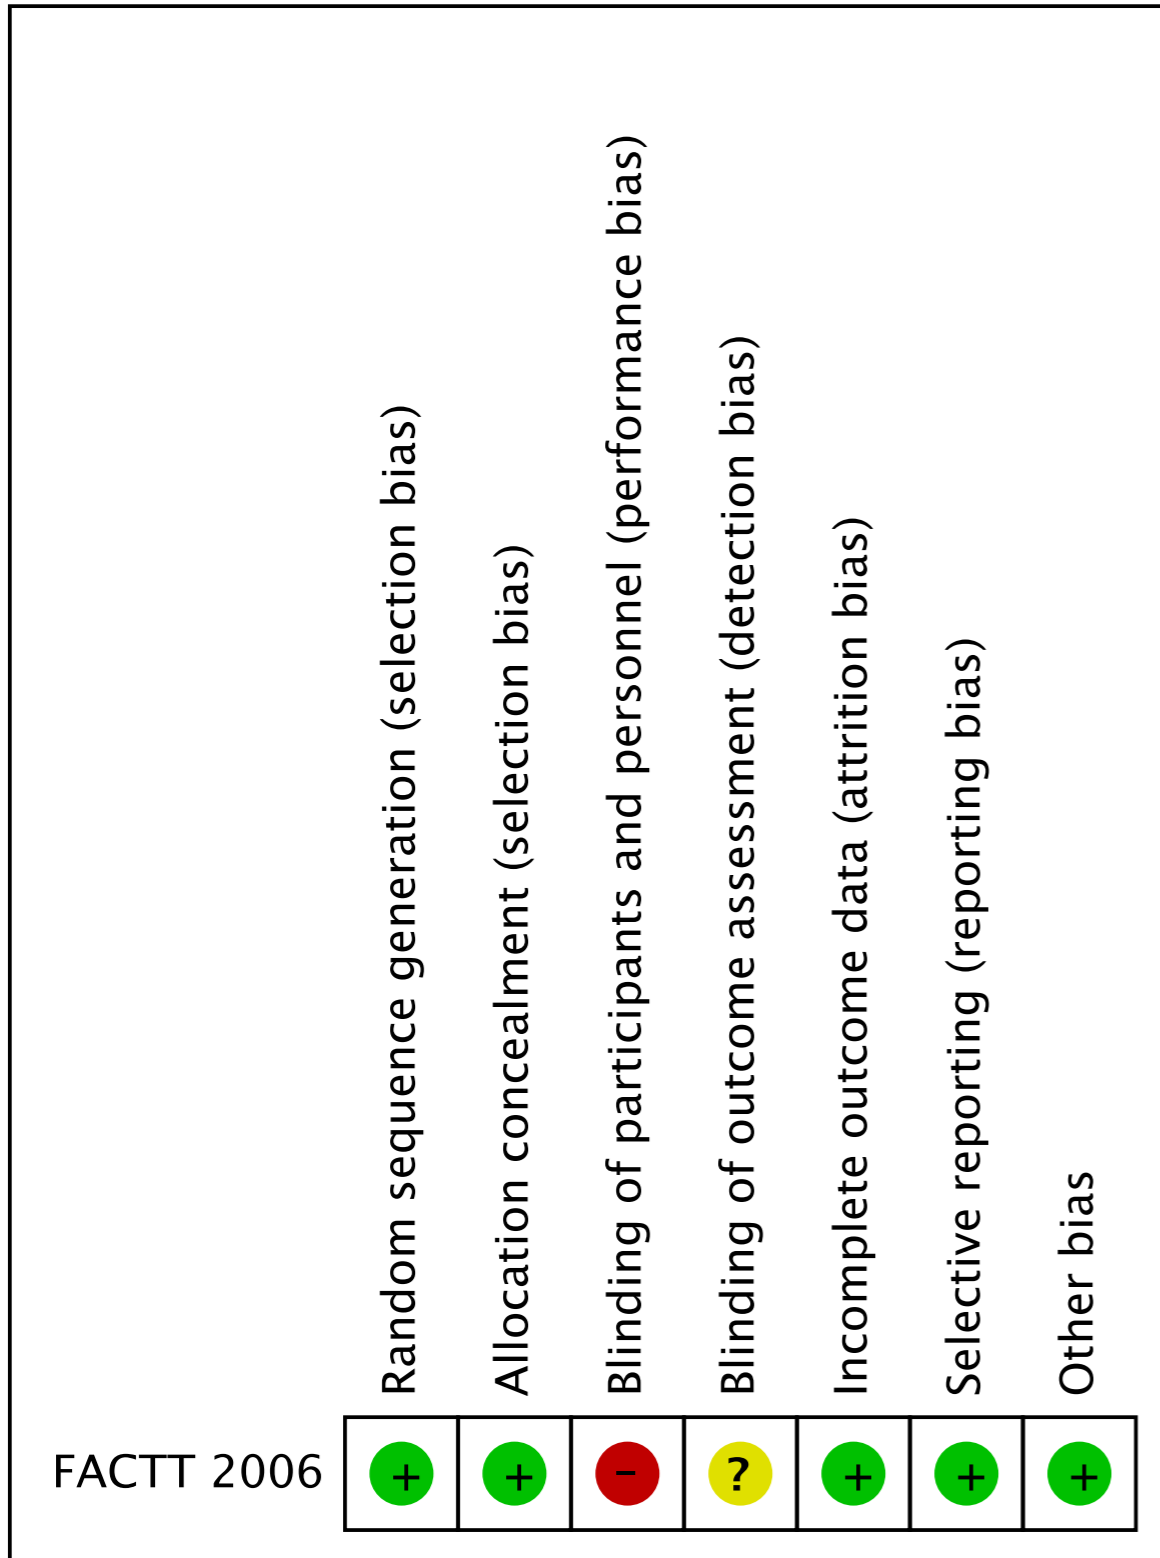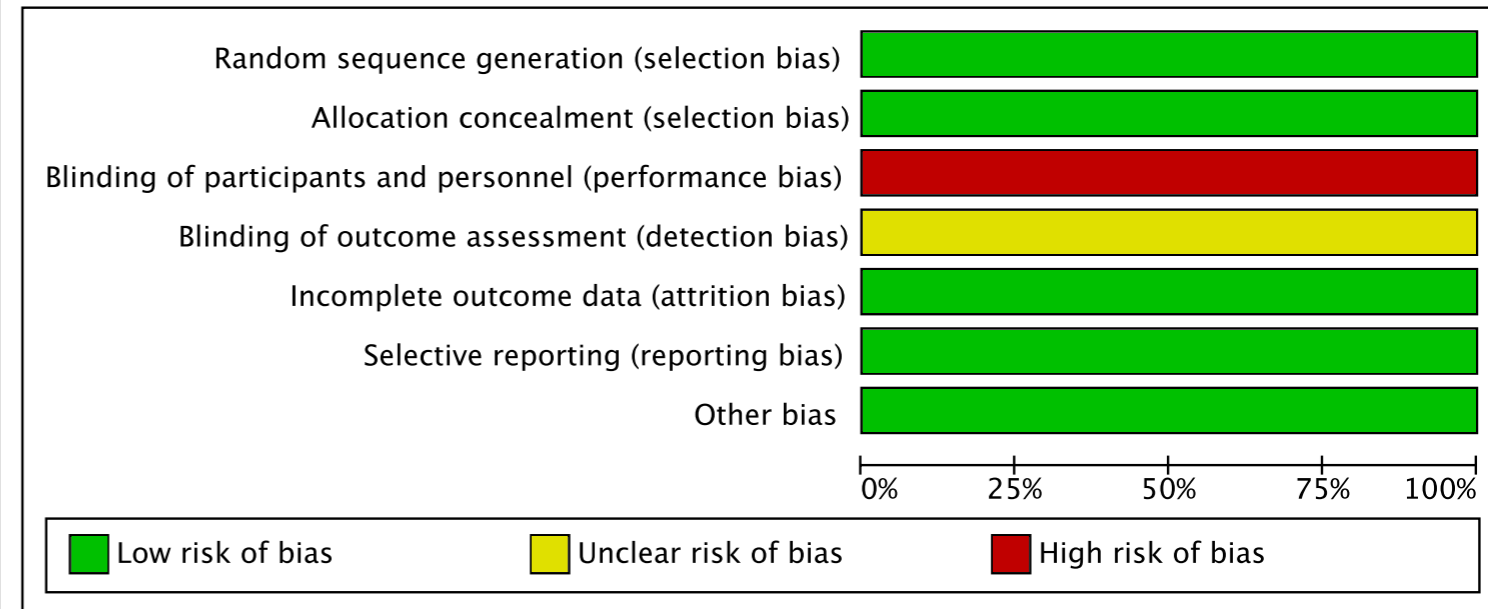

### Short term mortality

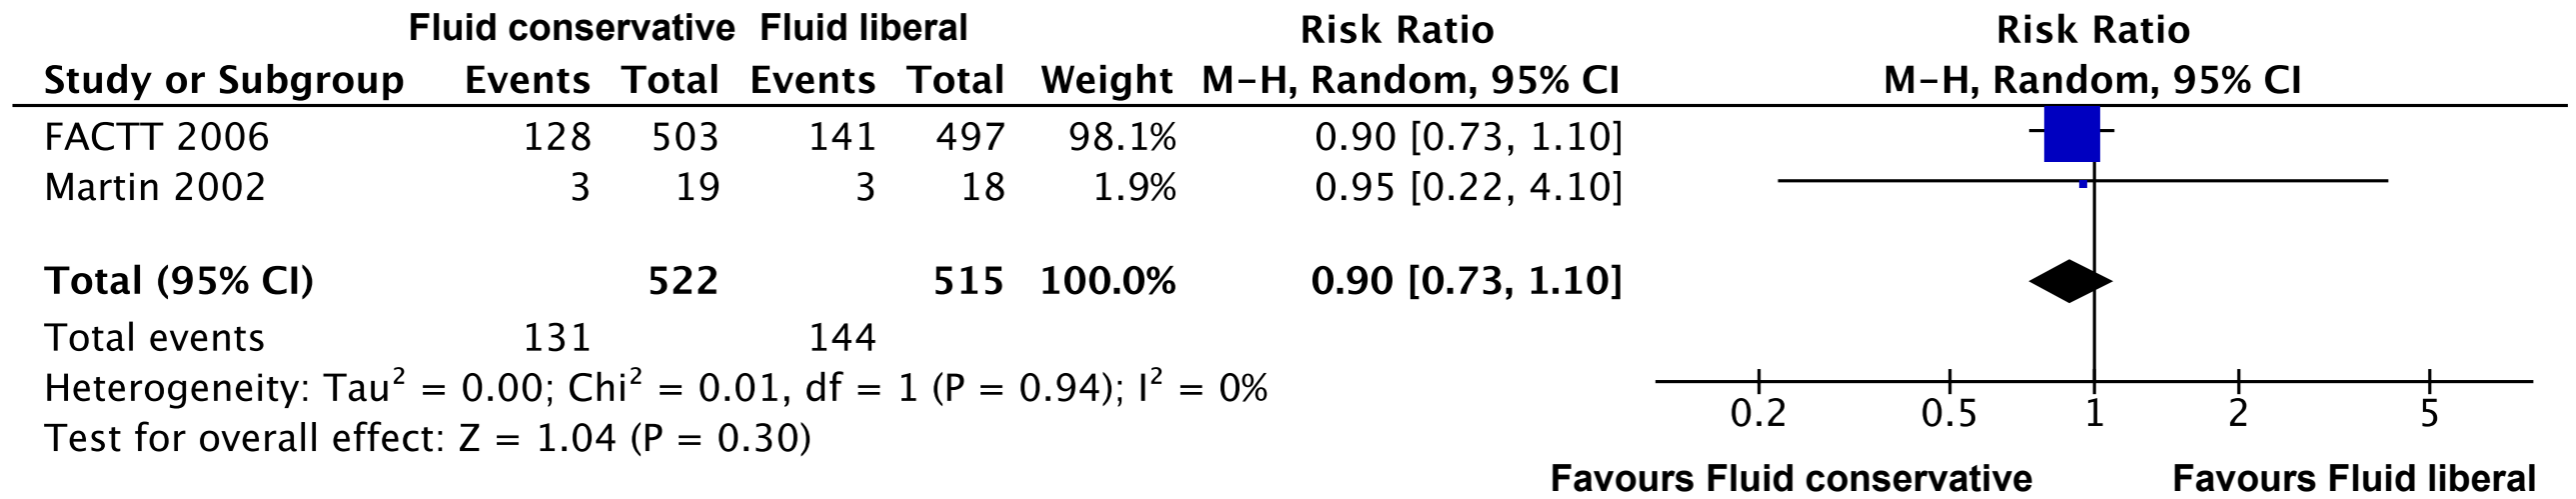

### VFD

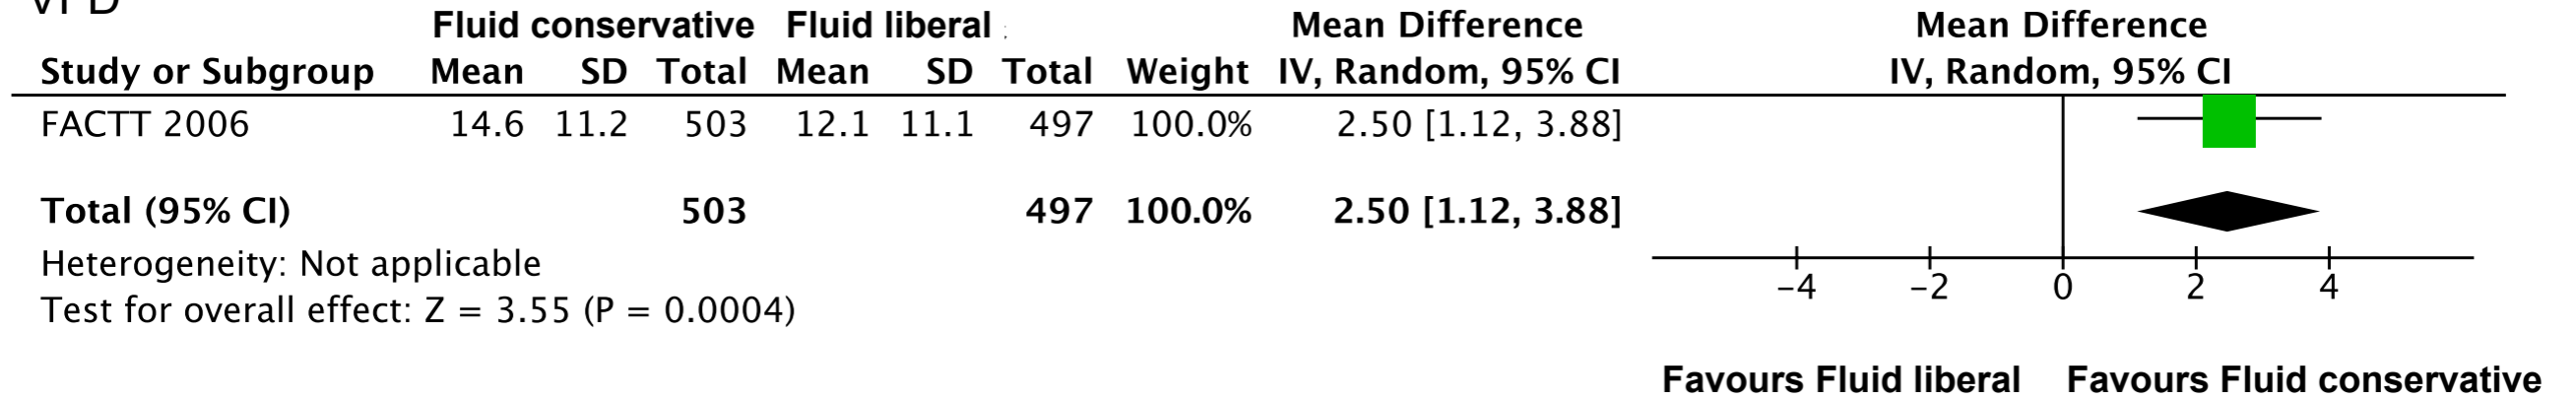

### Renal replacemnt Therapy

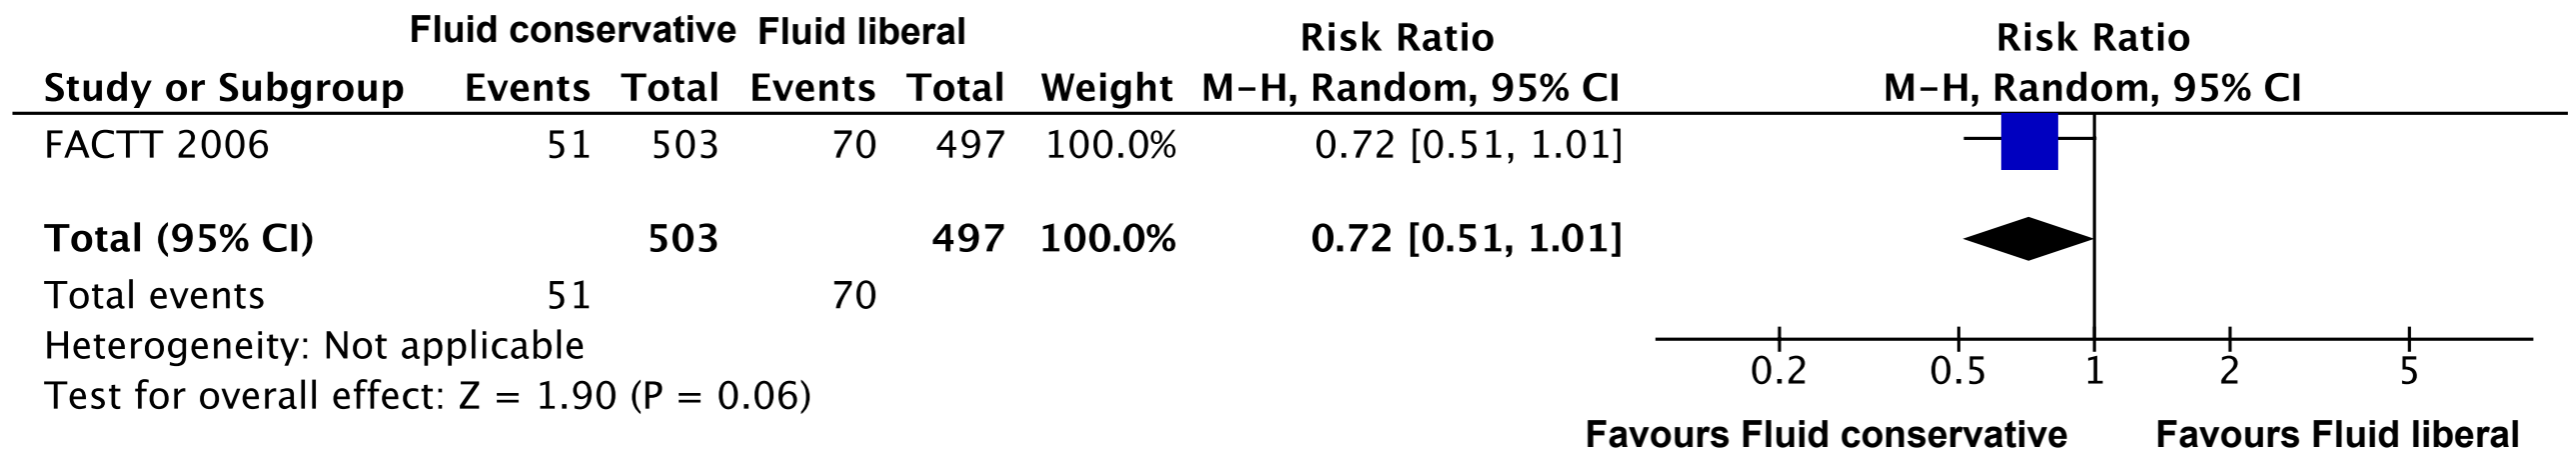

## CQ10 Summary of findings:

**Conservative strategy compared to liberal strategy for adult ARDS****Patients or population:** adult ARDS**Intervention:** conservative strategy**Comparison:** liberal strategy

| Outcomes                            | Anticipated absolute effects (95% CI) |                                   | Relative effect (95% CI)         | No of participants (studies) | Quality of the evidence (GRADE) | Comments |
|-------------------------------------|---------------------------------------|-----------------------------------|----------------------------------|------------------------------|---------------------------------|----------|
|                                     | Risk with liberal strategy            | Risk with conservative strategy   |                                  |                              |                                 |          |
| Short-term (<90d) mortality         | <b>Study population</b>               |                                   | <b>RR 0.90</b><br>(0.73 to 1.10) | 1037<br>(2 RCTs)             | ⊕⊕⊕○<br>MODERATE <sup>1</sup>   |          |
|                                     | 280 / 1000                            | <b>252 / 1000</b><br>(204 to 308) |                                  |                              |                                 |          |
|                                     | <b>Low risk patients</b>              |                                   |                                  |                              |                                 |          |
|                                     | 250 / 1000                            | <b>225 / 1000</b><br>(183 to 275) |                                  |                              |                                 |          |
| VFD                                 | <b>High risk patients</b>             |                                   | -                                | 1000<br>(1 RCT)              | ⊕⊕⊕⊕<br>HIGH                    |          |
|                                     | 450 / 1000                            | <b>405 / 1000</b><br>(329 to 495) |                                  |                              |                                 |          |
| Renal replacement therapy (60 days) | <b>Study population</b>               |                                   | <b>RR 0.72</b><br>(0.51 to 1.01) | 1000<br>(1 RCT)              | ⊕⊕⊕○<br>MODERATE <sup>1</sup>   |          |
|                                     | 141 / 1000                            | <b>101 / 1000</b><br>(72 to 142)  |                                  |                              |                                 |          |
|                                     | <b>Moderate risk patients</b>         |                                   |                                  |                              |                                 |          |
|                                     | 150 / 1000                            | <b>108 / 1000</b><br>(77 to 152)  |                                  |                              |                                 |          |

\*The risk in the intervention group (and its 95% confidence interval) is based on the assumed risk in the comparison group and the relative effect of the intervention (and its 95% CI).

CI: Confidence interval; RR: Risk ratio; MD: Mean difference

**GRADE Working Group grades of evidence**

**High quality:** We are very confident that the true effect lies close to that of the estimate of the effect

**Moderate quality:** We are moderately confident in the effect estimate: The true effect is likely to be close to the estimate of the effect, but there is a possibility that it is substantially different

**Low quality:** Our confidence in the effect estimate is limited: The true effect may be substantially different from the estimate of the effect

**Very low quality:** We have very little confidence in the effect estimate: The true effect is likely to be substantially different from the estimate of effect

1. Wide 95%CI due to small case number

**CQ10****Question:** How should fluid balance be maintained on a daily basis in adult patients with ARDS: Liberal vs. Conservative strategy?

| Quality assessment                           |                   |              |               |              |                      |                      | No of patients        |                  | Effect                           |                                                   | Quality                       | Importance |                                                |
|----------------------------------------------|-------------------|--------------|---------------|--------------|----------------------|----------------------|-----------------------|------------------|----------------------------------|---------------------------------------------------|-------------------------------|------------|------------------------------------------------|
| No of studies                                | Study design      | Risk of bias | Inconsistency | Indirectness | Imprecision          | Other considerations | Conservative strategy | Liberal strategy | Relative (95% CI)                | Absolute (95% CI)                                 |                               |            |                                                |
| Short-term Mortality <sup>Note 1)</sup>      |                   |              |               |              |                      |                      |                       |                  |                                  |                                                   |                               |            |                                                |
| 2                                            | Randomised trials | Not serious  | Not serious   | Not serious  | Serious <sup>1</sup> | None                 | 131/522 (25.1%)       | 144/515 (28.0%)  | <b>RR 0.90</b><br>(0.73 to 1.10) | 28 fewer / 1000<br>(from 28 more to 75 fewer)     | ⊕⊕⊕⊖<br>MODERATE <sup>1</sup> | CRITICAL   |                                                |
|                                              |                   |              |               |              |                      |                      |                       | 25.0%            |                                  |                                                   |                               |            | 25 fewer / 1000<br>(from 25 more to 68 fewer)  |
|                                              |                   |              |               |              |                      |                      |                       | 45.0%            |                                  |                                                   |                               |            | 45 fewer / 1000<br>(from 45 more to 122 fewer) |
| VFD                                          |                   |              |               |              |                      |                      |                       |                  |                                  |                                                   |                               |            |                                                |
| 1                                            | Randomised trials | Not serious  | Not serious   | Not serious  | Not serious          | None                 | 503                   | 497              | -                                | MD 2.5 days more<br>From (1.12 more to 3.88 more) | ⊕⊕⊕⊕<br>HIGH                  | CRITICAL   |                                                |
| Renal Replacement Therapy <sup>Note 2)</sup> |                   |              |               |              |                      |                      |                       |                  |                                  |                                                   |                               |            |                                                |
| 1                                            | Randomised trials | Not serious  | Not serious   | Not serious  | Serious <sup>1</sup> | None                 | 51/503 (10.1%)        | 70/497 (14.1%)   | <b>RR 0.72</b><br>(0.51 to 1.01) | 39 fewer / 1000<br>(from 1 more to 69 fewer)      | ⊕⊕⊕⊖<br>MODERATE <sup>1</sup> | IMPORTANT  |                                                |
|                                              |                   |              |               |              |                      |                      |                       | 15.0%            |                                  |                                                   |                               |            | 42 fewer / 1000<br>(from 2 more to 74 fewer)   |

**CI:** Confidence interval; **RR:** Risk ratio; **MD:** Mean difference

1. Wide 95%CI due to small number of patients

**Evidence-to-Decision table**

**CQ10 : How should fluid balance be maintained on a daily basis in adult patients with ARDS?**

POPULATION : ADULT PATIENTS WITH ARDS

INTERVENTION : FLUID CONSERVATIVE STRATEGY

| CRITERIA                                                                                                                                                                                                                                                                                                                                                                                                        | JUDGEMENTS                                                                                                                                                                                                                                                                                                                                                                                                                                                                                                                   | RESERCH EVIDENCE                                                                                                                                                                                                                                                                                                                                                                                                                                                                                                                                                                                                                                                                                                                                                                                                                                                                                                                                                                                                                                                                                                                                                                                                                             | ADDITIONAL CONSIDERATION                     |                                               |                                   |                                         |                               |                                         |                        |                         |                                             |                                              |            |                         |                                              |            |                         |                                               |                        |                   |                   |                                      |   |                                              |            |                        |                                             |                        |            |                               |                                              |  |
|-----------------------------------------------------------------------------------------------------------------------------------------------------------------------------------------------------------------------------------------------------------------------------------------------------------------------------------------------------------------------------------------------------------------|------------------------------------------------------------------------------------------------------------------------------------------------------------------------------------------------------------------------------------------------------------------------------------------------------------------------------------------------------------------------------------------------------------------------------------------------------------------------------------------------------------------------------|----------------------------------------------------------------------------------------------------------------------------------------------------------------------------------------------------------------------------------------------------------------------------------------------------------------------------------------------------------------------------------------------------------------------------------------------------------------------------------------------------------------------------------------------------------------------------------------------------------------------------------------------------------------------------------------------------------------------------------------------------------------------------------------------------------------------------------------------------------------------------------------------------------------------------------------------------------------------------------------------------------------------------------------------------------------------------------------------------------------------------------------------------------------------------------------------------------------------------------------------|----------------------------------------------|-----------------------------------------------|-----------------------------------|-----------------------------------------|-------------------------------|-----------------------------------------|------------------------|-------------------------|---------------------------------------------|----------------------------------------------|------------|-------------------------|----------------------------------------------|------------|-------------------------|-----------------------------------------------|------------------------|-------------------|-------------------|--------------------------------------|---|----------------------------------------------|------------|------------------------|---------------------------------------------|------------------------|------------|-------------------------------|----------------------------------------------|--|
| <b>PROBLEM</b>                                                                                                                                                                                                                                                                                                                                                                                                  | <p><b>Is the problem a priority?</b></p> <p> <input type="radio"/> No<br/> <input type="radio"/> Probably no<br/> <input checked="" type="radio"/> Probably yes<br/> <input type="radio"/> Yes<br/>                     -----<br/> <input type="radio"/> Varies<br/> <input type="radio"/> Don't know                 </p>                                                                                                                                                                                                   | <p>In patients with ARDS, pulmonary edema is caused by vascular endothelial dysfunction or increased vascular permeability<sup>(3)</sup>. A positive fluid balance in patients with ARDS increases the mortality rate (4). Extravascular lung water content is associated with disease severity and mortality rate (5).</p> <p>However, there is no previous RCT that reported improvement in mortality rate by changing the fluid management in patients with ARDS. It has not been established how fluid balance is maintained in patients with ARDS despite the fact that optimally reducing fluid volume is well known and remains a goal in daily clinical practice. Therefore, the priority of this issue is considered to be high.</p>                                                                                                                                                                                                                                                                                                                                                                                                                                                                                                |                                              |                                               |                                   |                                         |                               |                                         |                        |                         |                                             |                                              |            |                         |                                              |            |                         |                                               |                        |                   |                   |                                      |   |                                              |            |                        |                                             |                        |            |                               |                                              |  |
|                                                                                                                                                                                                                                                                                                                                                                                                                 | <p><b>What is the overall certainty of the evidence of effects?</b></p> <p> <input type="radio"/> Very low<br/> <input type="radio"/> Low<br/> <input checked="" type="radio"/> Moderate<br/> <input type="radio"/> High<br/>                     -----<br/> <input type="radio"/> No included studies                 </p>                                                                                                                                                                                                  | <p><b>The relative importance or values of the main outcomes of interest:</b></p> <table border="1"> <thead> <tr> <th>Outcome</th> <th>Relative importance</th> <th>Certainty of the evidence (GRADE)</th> </tr> </thead> <tbody> <tr> <td>Short term mortality<sup>Note 1)</sup></td> <td>CRITICAL</td> <td>⊕⊕⊕⊖<br/>MODERATE</td> </tr> <tr> <td>VFD<sup>Note 2)</sup></td> <td>CRITICAL</td> <td>⊕⊕⊕⊕<br/>HIGH</td> </tr> <tr> <td>Renal Replacement Therapy<sup>Note 3)</sup></td> <td>IMPORTANT</td> <td>⊕⊕⊕⊖<br/>MODERATE</td> </tr> </tbody> </table>                                                                                                                                                                                                                                                                                                                                                                                                                                                                                                                                                                                                                                                                                 | Outcome                                      | Relative importance                           | Certainty of the evidence (GRADE) | Short term mortality <sup>Note 1)</sup> | CRITICAL                      | ⊕⊕⊕⊖<br>MODERATE                        | VFD <sup>Note 2)</sup> | CRITICAL                | ⊕⊕⊕⊕<br>HIGH                                | Renal Replacement Therapy <sup>Note 3)</sup> | IMPORTANT  | ⊕⊕⊕⊖<br>MODERATE        |                                              |            |                         |                                               |                        |                   |                   |                                      |   |                                              |            |                        |                                             |                        |            |                               |                                              |  |
| Outcome                                                                                                                                                                                                                                                                                                                                                                                                         | Relative importance                                                                                                                                                                                                                                                                                                                                                                                                                                                                                                          | Certainty of the evidence (GRADE)                                                                                                                                                                                                                                                                                                                                                                                                                                                                                                                                                                                                                                                                                                                                                                                                                                                                                                                                                                                                                                                                                                                                                                                                            |                                              |                                               |                                   |                                         |                               |                                         |                        |                         |                                             |                                              |            |                         |                                              |            |                         |                                               |                        |                   |                   |                                      |   |                                              |            |                        |                                             |                        |            |                               |                                              |  |
| Short term mortality <sup>Note 1)</sup>                                                                                                                                                                                                                                                                                                                                                                         | CRITICAL                                                                                                                                                                                                                                                                                                                                                                                                                                                                                                                     | ⊕⊕⊕⊖<br>MODERATE                                                                                                                                                                                                                                                                                                                                                                                                                                                                                                                                                                                                                                                                                                                                                                                                                                                                                                                                                                                                                                                                                                                                                                                                                             |                                              |                                               |                                   |                                         |                               |                                         |                        |                         |                                             |                                              |            |                         |                                              |            |                         |                                               |                        |                   |                   |                                      |   |                                              |            |                        |                                             |                        |            |                               |                                              |  |
| VFD <sup>Note 2)</sup>                                                                                                                                                                                                                                                                                                                                                                                          | CRITICAL                                                                                                                                                                                                                                                                                                                                                                                                                                                                                                                     | ⊕⊕⊕⊕<br>HIGH                                                                                                                                                                                                                                                                                                                                                                                                                                                                                                                                                                                                                                                                                                                                                                                                                                                                                                                                                                                                                                                                                                                                                                                                                                 |                                              |                                               |                                   |                                         |                               |                                         |                        |                         |                                             |                                              |            |                         |                                              |            |                         |                                               |                        |                   |                   |                                      |   |                                              |            |                        |                                             |                        |            |                               |                                              |  |
| Renal Replacement Therapy <sup>Note 3)</sup>                                                                                                                                                                                                                                                                                                                                                                    | IMPORTANT                                                                                                                                                                                                                                                                                                                                                                                                                                                                                                                    | ⊕⊕⊕⊖<br>MODERATE                                                                                                                                                                                                                                                                                                                                                                                                                                                                                                                                                                                                                                                                                                                                                                                                                                                                                                                                                                                                                                                                                                                                                                                                                             |                                              |                                               |                                   |                                         |                               |                                         |                        |                         |                                             |                                              |            |                         |                                              |            |                         |                                               |                        |                   |                   |                                      |   |                                              |            |                        |                                             |                        |            |                               |                                              |  |
| <b>BENEFITS &amp; HARMS OF THE OPTIONS</b>                                                                                                                                                                                                                                                                                                                                                                      | <p><b>Is there important uncertainty about or variability in how much people value the main outcomes?</b></p> <p> <input type="radio"/> Important uncertainty or variability<br/> <input checked="" type="radio"/> Possibly important uncertainty or variability<br/> <input type="radio"/> Possibly no important uncertainty or variability<br/> <input type="radio"/> No important uncertainty or variability<br/>                     -----<br/> <input type="radio"/> No known undesirable outcomes                 </p> | <p><b>Summary of findings:</b></p> <table border="1"> <thead> <tr> <th>Outcome</th> <th>Liberal</th> <th>Conservative</th> <th>Absolute effect (95% CI)</th> <th>Relative effect (RR) (95% CI)</th> </tr> </thead> <tbody> <tr> <td rowspan="3">Short term mortality<sup>Note 1)</sup></td> <td>280 / 1000</td> <td>252 / 1000 (204 to 308)</td> <td>28 fewer per 1000 (from 28 more to 75fewer)</td> <td rowspan="3">RR 0.90 (0.73 to 1.10)</td> </tr> <tr> <td>250 / 1000</td> <td>225 / 1000 (183 to 275)</td> <td>25 fewer per 1000 (from 25 more to 68 fewer)</td> </tr> <tr> <td>450 / 1000</td> <td>405 / 1000 (329 to 495)</td> <td>45 fewer per 1000 (from 45 more to 122 fewer)</td> </tr> <tr> <td>VFD<sup>Note 2)</sup></td> <td>Average 12.1 days</td> <td>Average 14.6 days</td> <td>MD 2.5more (1.12 fewer to 3.38 more)</td> <td>-</td> </tr> <tr> <td rowspan="2">Renal Replacement Therapy<sup>Note 3)</sup></td> <td>141 / 1000</td> <td>101 / 1000 (72 to 142)</td> <td>39 fewer per 1000 (from 1 more to 69 fewer)</td> <td rowspan="2">RR 0.72 (0.51 to 1.01)</td> </tr> <tr> <td>150 / 1000</td> <td><b>108 / 1000</b> (77 to 152)</td> <td>42 fewer per 1000 (from 27 more to 74 fewer)</td> </tr> </tbody> </table> | Outcome                                      | Liberal                                       | Conservative                      | Absolute effect (95% CI)                | Relative effect (RR) (95% CI) | Short term mortality <sup>Note 1)</sup> | 280 / 1000             | 252 / 1000 (204 to 308) | 28 fewer per 1000 (from 28 more to 75fewer) | RR 0.90 (0.73 to 1.10)                       | 250 / 1000 | 225 / 1000 (183 to 275) | 25 fewer per 1000 (from 25 more to 68 fewer) | 450 / 1000 | 405 / 1000 (329 to 495) | 45 fewer per 1000 (from 45 more to 122 fewer) | VFD <sup>Note 2)</sup> | Average 12.1 days | Average 14.6 days | MD 2.5more (1.12 fewer to 3.38 more) | - | Renal Replacement Therapy <sup>Note 3)</sup> | 141 / 1000 | 101 / 1000 (72 to 142) | 39 fewer per 1000 (from 1 more to 69 fewer) | RR 0.72 (0.51 to 1.01) | 150 / 1000 | <b>108 / 1000</b> (77 to 152) | 42 fewer per 1000 (from 27 more to 74 fewer) |  |
|                                                                                                                                                                                                                                                                                                                                                                                                                 | Outcome                                                                                                                                                                                                                                                                                                                                                                                                                                                                                                                      | Liberal                                                                                                                                                                                                                                                                                                                                                                                                                                                                                                                                                                                                                                                                                                                                                                                                                                                                                                                                                                                                                                                                                                                                                                                                                                      | Conservative                                 | Absolute effect (95% CI)                      | Relative effect (RR) (95% CI)     |                                         |                               |                                         |                        |                         |                                             |                                              |            |                         |                                              |            |                         |                                               |                        |                   |                   |                                      |   |                                              |            |                        |                                             |                        |            |                               |                                              |  |
|                                                                                                                                                                                                                                                                                                                                                                                                                 | Short term mortality <sup>Note 1)</sup>                                                                                                                                                                                                                                                                                                                                                                                                                                                                                      | 280 / 1000                                                                                                                                                                                                                                                                                                                                                                                                                                                                                                                                                                                                                                                                                                                                                                                                                                                                                                                                                                                                                                                                                                                                                                                                                                   | 252 / 1000 (204 to 308)                      | 28 fewer per 1000 (from 28 more to 75fewer)   | RR 0.90 (0.73 to 1.10)            |                                         |                               |                                         |                        |                         |                                             |                                              |            |                         |                                              |            |                         |                                               |                        |                   |                   |                                      |   |                                              |            |                        |                                             |                        |            |                               |                                              |  |
|                                                                                                                                                                                                                                                                                                                                                                                                                 |                                                                                                                                                                                                                                                                                                                                                                                                                                                                                                                              | 250 / 1000                                                                                                                                                                                                                                                                                                                                                                                                                                                                                                                                                                                                                                                                                                                                                                                                                                                                                                                                                                                                                                                                                                                                                                                                                                   | 225 / 1000 (183 to 275)                      | 25 fewer per 1000 (from 25 more to 68 fewer)  |                                   |                                         |                               |                                         |                        |                         |                                             |                                              |            |                         |                                              |            |                         |                                               |                        |                   |                   |                                      |   |                                              |            |                        |                                             |                        |            |                               |                                              |  |
|                                                                                                                                                                                                                                                                                                                                                                                                                 |                                                                                                                                                                                                                                                                                                                                                                                                                                                                                                                              | 450 / 1000                                                                                                                                                                                                                                                                                                                                                                                                                                                                                                                                                                                                                                                                                                                                                                                                                                                                                                                                                                                                                                                                                                                                                                                                                                   | 405 / 1000 (329 to 495)                      | 45 fewer per 1000 (from 45 more to 122 fewer) |                                   |                                         |                               |                                         |                        |                         |                                             |                                              |            |                         |                                              |            |                         |                                               |                        |                   |                   |                                      |   |                                              |            |                        |                                             |                        |            |                               |                                              |  |
| VFD <sup>Note 2)</sup>                                                                                                                                                                                                                                                                                                                                                                                          | Average 12.1 days                                                                                                                                                                                                                                                                                                                                                                                                                                                                                                            | Average 14.6 days                                                                                                                                                                                                                                                                                                                                                                                                                                                                                                                                                                                                                                                                                                                                                                                                                                                                                                                                                                                                                                                                                                                                                                                                                            | MD 2.5more (1.12 fewer to 3.38 more)         | -                                             |                                   |                                         |                               |                                         |                        |                         |                                             |                                              |            |                         |                                              |            |                         |                                               |                        |                   |                   |                                      |   |                                              |            |                        |                                             |                        |            |                               |                                              |  |
| Renal Replacement Therapy <sup>Note 3)</sup>                                                                                                                                                                                                                                                                                                                                                                    | 141 / 1000                                                                                                                                                                                                                                                                                                                                                                                                                                                                                                                   | 101 / 1000 (72 to 142)                                                                                                                                                                                                                                                                                                                                                                                                                                                                                                                                                                                                                                                                                                                                                                                                                                                                                                                                                                                                                                                                                                                                                                                                                       | 39 fewer per 1000 (from 1 more to 69 fewer)  | RR 0.72 (0.51 to 1.01)                        |                                   |                                         |                               |                                         |                        |                         |                                             |                                              |            |                         |                                              |            |                         |                                               |                        |                   |                   |                                      |   |                                              |            |                        |                                             |                        |            |                               |                                              |  |
|                                                                                                                                                                                                                                                                                                                                                                                                                 | 150 / 1000                                                                                                                                                                                                                                                                                                                                                                                                                                                                                                                   | <b>108 / 1000</b> (77 to 152)                                                                                                                                                                                                                                                                                                                                                                                                                                                                                                                                                                                                                                                                                                                                                                                                                                                                                                                                                                                                                                                                                                                                                                                                                | 42 fewer per 1000 (from 27 more to 74 fewer) |                                               |                                   |                                         |                               |                                         |                        |                         |                                             |                                              |            |                         |                                              |            |                         |                                               |                        |                   |                   |                                      |   |                                              |            |                        |                                             |                        |            |                               |                                              |  |
| <p><b>How substantial are the desirable anticipated effects?</b></p> <p> <input type="radio"/> Trivial<br/> <input type="radio"/> Small<br/> <input type="radio"/> Moderate<br/> <input type="radio"/> Large<br/>                     -----<br/> <input checked="" type="radio"/> Varies<br/> <input type="radio"/> Don't know                 </p>                                                             | <p>Summary : There was no significant difference in short-term mortality or the need for renal replacement therapy. VFD in patients treated with a conservative strategy was greater than those treated with a liberal strategy (14.6 days vs. 12.1 days).</p>                                                                                                                                                                                                                                                               |                                                                                                                                                                                                                                                                                                                                                                                                                                                                                                                                                                                                                                                                                                                                                                                                                                                                                                                                                                                                                                                                                                                                                                                                                                              |                                              |                                               |                                   |                                         |                               |                                         |                        |                         |                                             |                                              |            |                         |                                              |            |                         |                                               |                        |                   |                   |                                      |   |                                              |            |                        |                                             |                        |            |                               |                                              |  |
| <p><b>How substantial are the undesirable anticipated effects?</b></p> <p> <input type="radio"/> Large<br/> <input checked="" type="radio"/> Moderate<br/> <input type="radio"/> Small<br/> <input type="radio"/> Trivial<br/>                     -----<br/> <input type="radio"/> Varies<br/> <input type="radio"/> Don't know                 </p>                                                           | <p>Renal failure free days also were not different between the two groups in FACTT 2006. In a post hoc analysis of this trial, more patients developed AKI by first the 2 days with a conservative strategy (11), however, after adjustment for fluid balance, the incidence of AKI was greater in patients treated with a liberal strategy (12). Both hypovolemia and congestion are important to maintain organ perfusion. Fluid restriction is not always associated with organ failure.</p>                              |                                                                                                                                                                                                                                                                                                                                                                                                                                                                                                                                                                                                                                                                                                                                                                                                                                                                                                                                                                                                                                                                                                                                                                                                                                              |                                              |                                               |                                   |                                         |                               |                                         |                        |                         |                                             |                                              |            |                         |                                              |            |                         |                                               |                        |                   |                   |                                      |   |                                              |            |                        |                                             |                        |            |                               |                                              |  |
| <p><b>Does the balance between desirable effects and undesirable effects favour the option or the comparison?</b></p> <p> <input type="radio"/> Favors the comparison<br/> <input type="radio"/> Probably favors the comparison<br/> <input type="radio"/> Does not favor either the intervention or the comparison<br/> <input checked="" type="radio"/> Probably favors the intervention                 </p> |                                                                                                                                                                                                                                                                                                                                                                                                                                                                                                                              |                                                                                                                                                                                                                                                                                                                                                                                                                                                                                                                                                                                                                                                                                                                                                                                                                                                                                                                                                                                                                                                                                                                                                                                                                                              |                                              |                                               |                                   |                                         |                               |                                         |                        |                         |                                             |                                              |            |                         |                                              |            |                         |                                               |                        |                   |                   |                                      |   |                                              |            |                        |                                             |                        |            |                               |                                              |  |

|               |                                                                                       |                                                                                                                                                                                                                                                                                                                                                                                                   |                                                                                                                                                                                                                                                                                                                    |  |
|---------------|---------------------------------------------------------------------------------------|---------------------------------------------------------------------------------------------------------------------------------------------------------------------------------------------------------------------------------------------------------------------------------------------------------------------------------------------------------------------------------------------------|--------------------------------------------------------------------------------------------------------------------------------------------------------------------------------------------------------------------------------------------------------------------------------------------------------------------|--|
|               |                                                                                       | <input type="radio"/> Favors the intervention<br>-----<br><input type="radio"/> Varies<br><input type="radio"/> Don't know                                                                                                                                                                                                                                                                        |                                                                                                                                                                                                                                                                                                                    |  |
| RESOURCEUSE   | <b>How large are the resource requirements (costs)?</b>                               | <input type="radio"/> Large costs<br><input type="radio"/> Moderate costs<br><input type="radio"/> Negligible costs and savings<br><input checked="" type="radio"/> Moderate savings<br><input type="radio"/> Large savings<br>-----<br><input type="radio"/> Varies<br><input type="radio"/> Don't know                                                                                          | PAOP or CVP was used to evaluate fluid status in FACTT 2006, but various methods were used in other trials. If we evaluate fluid status in some way, we don't need special resources.                                                                                                                              |  |
|               | <b>Does the cost effectiveness of the option favour the option or the comparison?</b> | <input type="radio"/> Favors the comparison<br><input type="radio"/> Probably favors the comparison<br><input type="radio"/> Does not favor either the intervention or the comparison<br><input checked="" type="radio"/> Probably favors the intervention<br><input type="radio"/> Favors the intervention<br>-----<br><input type="radio"/> Varies<br><input type="radio"/> No included studies | The dose of furosemide increased to 600mg in patients treated with a conservative strategy during the 7day intervention period.<br>The cost of furosemide 20mg is 60 JPY. If 600mg furosemide is used additionally, it costs 1800 JPY more. But, it is considered to be effective, because VFD increases 2.5 days. |  |
| EQUITY        | <b>What would be the impact on health equity?</b>                                     | <input type="radio"/> Reduced<br><input checked="" type="radio"/> Probably reduced<br><input type="radio"/> Probably no impact<br><input type="radio"/> Probably increased<br><input type="radio"/> Increased<br>-----<br><input type="radio"/> Varies<br><input type="radio"/> Don't know                                                                                                        | We can perform fluid restriction in routine practice.                                                                                                                                                                                                                                                              |  |
| ACCEPTABILITY | <b>Is the option acceptable to key stakeholders?</b>                                  | <input type="radio"/> No<br><input type="radio"/> Probably no<br><input checked="" type="radio"/> Probably yes<br><input type="radio"/> Yes<br>-----<br><input type="radio"/> Varies<br><input type="radio"/> Don't know                                                                                                                                                                          | It might be acceptable, because fluid restriction is a common strategy.                                                                                                                                                                                                                                            |  |
| FEASIBILITY   | <b>Is the option feasible to implement?</b>                                           | <input type="radio"/> No<br><input type="radio"/> Probably no<br><input type="radio"/> Probably yes<br><input checked="" type="radio"/> Yes<br>-----<br><input type="radio"/> Varies<br><input type="radio"/> Don't know                                                                                                                                                                          | We can perform fluid restriction in routine practice.                                                                                                                                                                                                                                                              |  |



## Recommendation

## CQ10 : How should fluid balance be maintained on a daily basis in adult patients with ARDS?

| Balance of consequences | Undesirable consequences <i>clearly outweigh</i> desirable consequences in most settings | Undesirable consequences <i>probably outweigh</i> desirable consequences in most settings | The balance between desirable and undesirable consequences is <i>closely balanced or uncertain</i> | Desirable consequences <i>probably outweigh</i> undesirable consequences in most settings | Desirable consequences <i>clearly outweigh</i> undesirable consequences in most settings |
|-------------------------|------------------------------------------------------------------------------------------|-------------------------------------------------------------------------------------------|----------------------------------------------------------------------------------------------------|-------------------------------------------------------------------------------------------|------------------------------------------------------------------------------------------|
| Judgement               | ○                                                                                        | ○                                                                                         | ●                                                                                                  | ○                                                                                         | ○                                                                                        |

| Type of recommendation | Strong recommendation against the intervention | Conditional recommendation against the intervention | Conditional recommendation for either the intervention or the comparison | Conditional recommendation for the intervention |
|------------------------|------------------------------------------------|-----------------------------------------------------|--------------------------------------------------------------------------|-------------------------------------------------|
| Judgement              | ○                                              | ○                                                   | ●                                                                        | ○                                               |

|                                      |                                                                                                                                                                                                                                                                                                                                                                                                                                                                                                                                                                                                                                                                                                                                                                                                                                                                                                                                                                                                                                                                                                                                                                                                                                                                                                                                                                                                                                                                                                                                                                                                                                                                                                                                                                                                                                                                                                                                                                                                                                                                                                                                                                                                                                                                                                                                                                                                                                                                                                                                                                                                                                                                                                                                                                                                                                                                                                                                                                                                                                                                                                                                                                                                                                                     |
|--------------------------------------|-----------------------------------------------------------------------------------------------------------------------------------------------------------------------------------------------------------------------------------------------------------------------------------------------------------------------------------------------------------------------------------------------------------------------------------------------------------------------------------------------------------------------------------------------------------------------------------------------------------------------------------------------------------------------------------------------------------------------------------------------------------------------------------------------------------------------------------------------------------------------------------------------------------------------------------------------------------------------------------------------------------------------------------------------------------------------------------------------------------------------------------------------------------------------------------------------------------------------------------------------------------------------------------------------------------------------------------------------------------------------------------------------------------------------------------------------------------------------------------------------------------------------------------------------------------------------------------------------------------------------------------------------------------------------------------------------------------------------------------------------------------------------------------------------------------------------------------------------------------------------------------------------------------------------------------------------------------------------------------------------------------------------------------------------------------------------------------------------------------------------------------------------------------------------------------------------------------------------------------------------------------------------------------------------------------------------------------------------------------------------------------------------------------------------------------------------------------------------------------------------------------------------------------------------------------------------------------------------------------------------------------------------------------------------------------------------------------------------------------------------------------------------------------------------------------------------------------------------------------------------------------------------------------------------------------------------------------------------------------------------------------------------------------------------------------------------------------------------------------------------------------------------------------------------------------------------------------------------------------------------------|
| <b>Recommendation</b>                | <b>We suggest fluid restriction in the management of adult ARDS patient. (GRADE 2B, “week recommendation” / Quality of evidence “Moderate”)</b>                                                                                                                                                                                                                                                                                                                                                                                                                                                                                                                                                                                                                                                                                                                                                                                                                                                                                                                                                                                                                                                                                                                                                                                                                                                                                                                                                                                                                                                                                                                                                                                                                                                                                                                                                                                                                                                                                                                                                                                                                                                                                                                                                                                                                                                                                                                                                                                                                                                                                                                                                                                                                                                                                                                                                                                                                                                                                                                                                                                                                                                                                                     |
| <b>Justification</b>                 | <p><b>Question:</b> How should fluid balance be maintained on a daily basis in adult patients with ARDS?</p> <p><b>Patients or population:</b> Adult patients with ARDS</p> <p><b>Intervention:</b> Conservative strategy</p> <p><b>Comparison:</b> Liberal strategy</p> <p><b>Outcomes:</b> Short-term mortality<sup>Note 1)</sup>, VFD<sup>Note 2)</sup>, Renal Replacement Therapy<sup>Note 3)</sup></p> <p><b>Summary of Evidence:</b> As a result of a systematic review, three RCTs comparing adult patients with ARDS who underwent fluid restriction with patients who were not fluid restricted were found. A study that examined the infused fluid volume in patients with shock in addition to patients with ARDS was excluded. While FACTT 2006 included a large number of patients, the other two studies included a small number. There was no significant difference in short-term mortality, but VFD out of 28 days was significantly increased (+2.5 days) in patients who underwent fluid restriction. There was no difference in the need for renal replacement therapy within 60 days.</p> <p><b>Quality of evidence:</b> There is no large-scale study that evaluates this CQ other than FACTT 2006, which is a large-scale multi-center study. As a result, two RCTs were included in the meta-analysis for mortality and only FACTT 2006 was included in the meta-analysis for other outcomes. Although FACTT 2006 was insufficiently blinded, it has a low risk for other biases and a sufficient number of patients. Inconsistency in the mortality rate between the studies was low (<math>I^2=0\%</math>), but Martin 2002 included only 37 patients while FACTT 2006 included 1000 patients. Indirectness was classified as ‘not serious’ because the result of FACTT 2006 is well matched to the PICO in this CQ. However, imprecision was classified as ‘serious’ because the confidence interval overlaps with the clinical decision threshold. Based on the above discussion, the overall quality of evidence was evaluated as ‘moderate’.</p> <p><b>Judgement of benefit, harms and costs:</b><br/>Fluid restriction didn’t decrease mortality, but could shorten the duration of mechanical ventilation without increasing the need for renal replacement therapy. Furosemide, which is used in FACTT 2006, is one of common diuretic drugs and a low-cost drug. Based on these reasons, it is considered that the benefits to be obtained are greater than the harms. If furosemide is used, there is a risk of electrolyte abnormalities.</p> <p><b>Recommendation:</b> We suggest fluid restriction in the management of adult ARDS patient. (GRADE 2B, “week recommendation” / Quality of evidence “Moderate”)</p> <p><b>Additional considerations:</b> We have no evidence about how to manage fluid balance, including monitoring or evaluation of fluid status. In recently 2 RCTs, fluid management using extravascular lung water (EVLW) was compared with pulmonary artery wedge pressure (PAWP) or central venous pressure (CVP). EVLW decreased the duration of mechanical ventilation compared with PAWP<sup>10, 11</sup>, but there were no survival benefits in both studies<sup>10, 11</sup>.</p> |
| <b>Subgroup considerations</b>       | none                                                                                                                                                                                                                                                                                                                                                                                                                                                                                                                                                                                                                                                                                                                                                                                                                                                                                                                                                                                                                                                                                                                                                                                                                                                                                                                                                                                                                                                                                                                                                                                                                                                                                                                                                                                                                                                                                                                                                                                                                                                                                                                                                                                                                                                                                                                                                                                                                                                                                                                                                                                                                                                                                                                                                                                                                                                                                                                                                                                                                                                                                                                                                                                                                                                |
| <b>Implementation considerations</b> | We included the study for ARDS patients with hemodynamic stability. If ARDS patient is demonstrating hemodynamic instability, we should consider fluid resuscitation. Furosemide was used in 3 RCTs included our analysis, but we could not find the study about other diuretics. In FACTT 2006, day 1 fluid balance was In 4200ml / Out 3000ml (using furosemide 150mg) in conservative group, In 5000ml / Out 2500ml (using furosemide 75mg) in liberal group. After day 2, the daily fluid balance in conservative group was less than liberal group (-400 to -150ml /day vs. about +500ml). The patients in conservative group were administrated more furosemide (130 to 160mg/day vs. 50 to 80mg/day)                                                                                                                                                                                                                                                                                                                                                                                                                                                                                                                                                                                                                                                                                                                                                                                                                                                                                                                                                                                                                                                                                                                                                                                                                                                                                                                                                                                                                                                                                                                                                                                                                                                                                                                                                                                                                                                                                                                                                                                                                                                                                                                                                                                                                                                                                                                                                                                                                                                                                                                                         |

|                                                 |                                                                                                                                                                                                                                                                                                                                                                                                                                                                                                                                                                                                                                             |
|-------------------------------------------------|---------------------------------------------------------------------------------------------------------------------------------------------------------------------------------------------------------------------------------------------------------------------------------------------------------------------------------------------------------------------------------------------------------------------------------------------------------------------------------------------------------------------------------------------------------------------------------------------------------------------------------------------|
| <b>Monitoring and evaluation considerations</b> | <p>In the sub-group analysis in FACTT 2006, there was no obvious difference between patients with a central venous catheter and those with a pulmonary artery catheter. Therefore, monitoring with a pulmonary artery catheter is not always required. Although there are other indicators including extravascular lung water content, cerebral natriuretic peptide level, and weight, there is no obvious answer regarding which measurement is more useful and what target value is appropriate for each measurement.</p> <p>When using furosemide, electrolytes should be carefully monitored for abnormalities such as hypokalemia.</p> |
| <b>Research priorities</b>                      | <p>Further study is required to determine which measurement is useful and what target value is appropriate for each measurement.</p> <p>In addition, another study may be needed to examine the optimal diuretic medication and infusion fluid.</p> <p>The study that followed the patients in FACTT 2006 up to 12 months suggests that management with fluid restriction might be a risk factor for cognitive dysfunction (10). Therefore, an additional study to examine long-term outcomes is also necessary.</p>                                                                                                                        |

Note 1) Short-term mortality was defined as 30-day or 60-day.

Note 2) Out of 28 days, the number of days for which the patient is not dependent on the mechanical ventilator. If the patient dies within 28 days, the number should be zero.

Note 3) Need for renal replacement therapy within 60 days

1. Donnelly SC, MacGregor I, Zamani A, et al. Plasma elastase levels and the development of the adult respiratory distress syndrome. *Am J Respir Crit Care Med* **151**(5): 1428-33, 1995. PMID 7735596
2. Moraes TJ, Chow CW, Downey GP. Proteases and lung injury. *Crit Care Med* **31**(4 Suppl): S189-94, 2003. PMID 12682439
3. Iwata K, Doi A, Ohji G, et al. Effect of neutrophil elastase inhibitor (sivelestat sodium) in the treatment of acute lung injury (ALI) and acute respiratory distress syndrome (ARDS): a systematic review and meta-analysis. *Intern Med* **49**(22): 2423-32, 2010. PMID 21088343
4. Aikawa N, Kawasaki Y. Clinical utility of the neutrophil elastase inhibitor sivelestat for the treatment of acute respiratory distress syndrome. *Ther Clin Risk Manag* **10**: 621-9, 2014. PMID 25120368

## CQ11. Study flow diagram

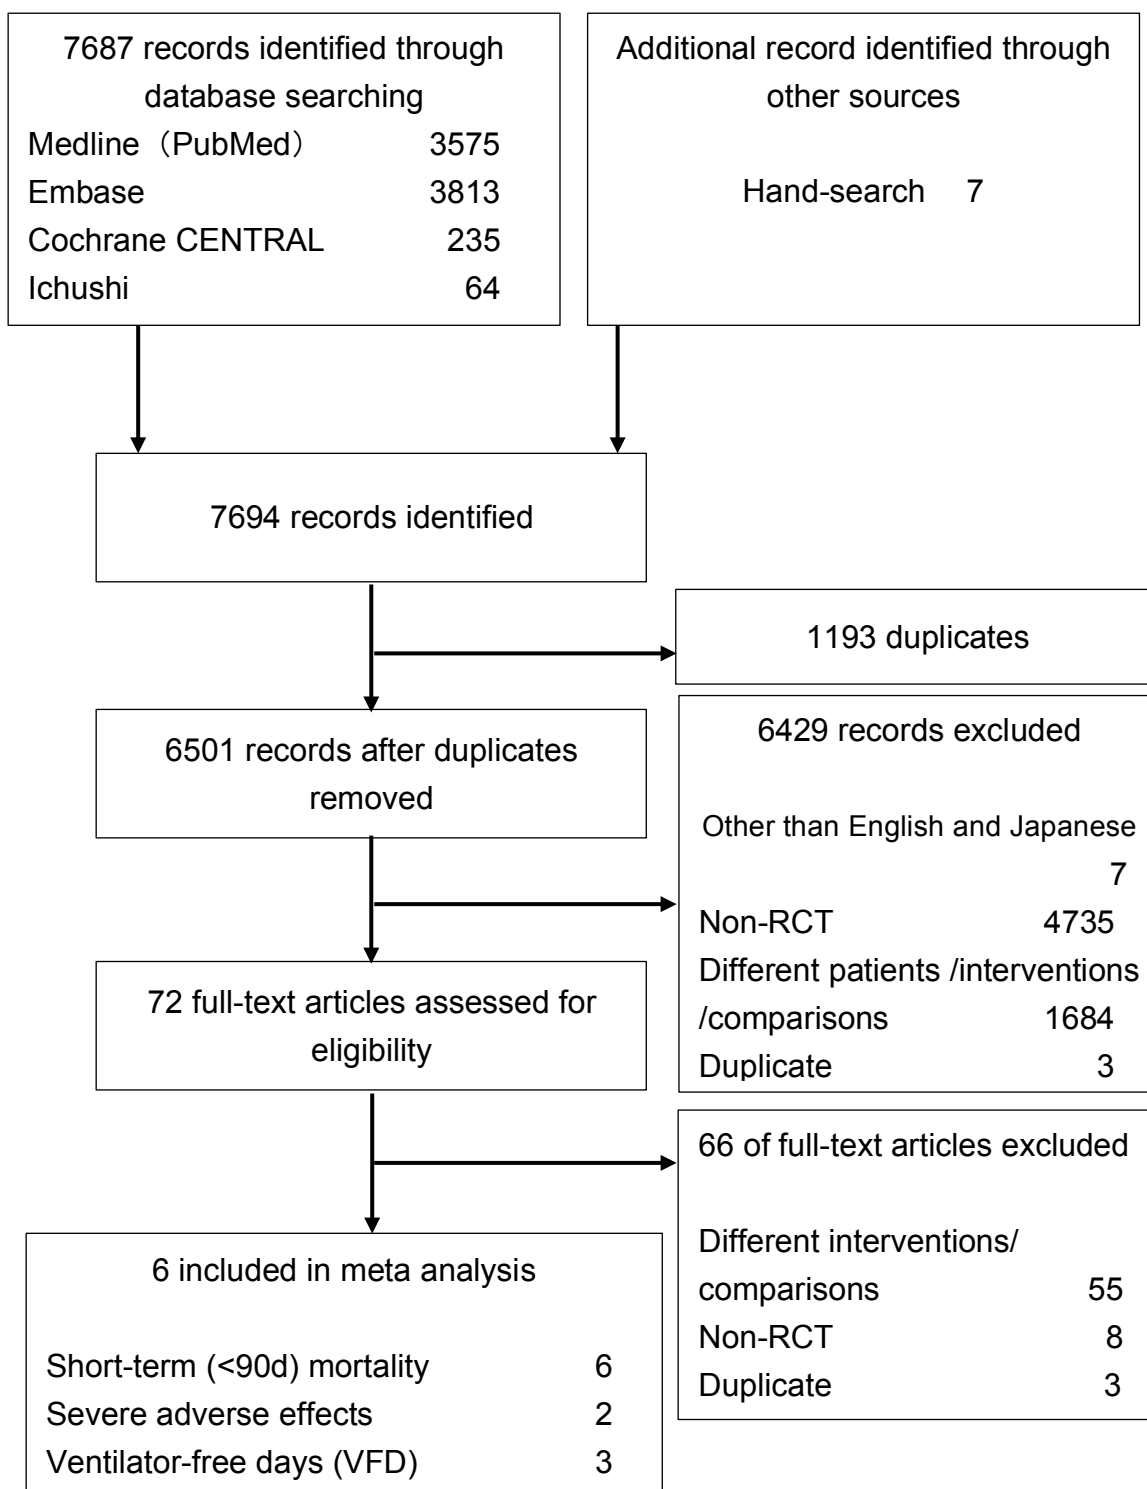

| Outcome |                            | Severe adverse effects                    |                                    | risk of bias                    |                               | serious (-1)                            |                                              |                                   |                                              |
|---------|----------------------------|-------------------------------------------|------------------------------------|---------------------------------|-------------------------------|-----------------------------------------|----------------------------------------------|-----------------------------------|----------------------------------------------|
| 番号      | 著者名 発表年<br>(Forest plot表示) | risk of bias評価                            |                                    |                                 |                               |                                         |                                              |                                   |                                              |
|         |                            | ランダム割付順番の生成<br>random sequence generation | 割り付けの隠蔽化<br>allocation concealment | ブラインド<br>blinding               |                               | 不完全なアウトカムデータ<br>incomplete outcome data | 選択されたアウトカムの報告<br>selective outcome reporting | その他のバイアス<br>Other sources of bias | 研究内でのバイアスのリスク<br>Risk of bias within a study |
|         |                            |                                           |                                    | 研究参加者と治療提供者<br>participants and | アウトカム評価者<br>outcome assessors |                                         |                                              |                                   |                                              |
| 3       | Tamakuma 1998              | Unclear risk                              | Unclear risk                       | High risk                       | High risk                     | Unclear risk                            | Unclear risk                                 | Unclear risk                      | High risk                                    |
| 4       | Zeihner 2004               | Low risk                                  | Low risk                           | Low risk                        | Low risk                      | Low risk                                | Unclear risk                                 | Low risk                          | Low risk                                     |
|         |                            |                                           |                                    |                                 |                               |                                         |                                              |                                   |                                              |
| 番号      | 著者名 発表年<br>(Forest plot表示) | risk of biasコメント                          |                                    |                                 |                               |                                         |                                              |                                   |                                              |
| 3       | Tamakuma 1998              | ランダム化の方法が未記載                              | 割り付け隠蔽化の方法が未記載                     | 盲検化されていない可能性                    | 盲検化されていない可能性                  | 6/20が脱落                                 | 事前に計画されたプロトコルが入手できなかった                       | 情報が不十分                            | high2項目                                      |
| 4       | Zeihner 2004               | 中央でランダム化                                  | 中央で割り付け、薬剤師により外観から薬剤が推定できないようカバーが  | 研究参加者、治療提供者ともブラインド化されている        | アウトカム評価者もブラインド化されている          | データの欠損がない                               | 評価するための十分な情報がない                              | 他のバイアスがない(中間解析で試験中断あり)            | low6項目、high0項目                               |

| Outcome |                            | VFD                                       |                                    | risk of bias                    |                               | not serious (0)                         |                                              |                                   |                                              |
|---------|----------------------------|-------------------------------------------|------------------------------------|---------------------------------|-------------------------------|-----------------------------------------|----------------------------------------------|-----------------------------------|----------------------------------------------|
| 番号      | 著者名 発表年<br>(Forest plot表示) | risk of bias評価                            |                                    |                                 |                               |                                         |                                              |                                   |                                              |
|         |                            | ランダム割付順番の生成<br>random sequence generation | 割り付けの隠蔽化<br>allocation concealment | ブラインド<br>blinding               |                               | 不完全なアウトカムデータ<br>incomplete outcome data | 選択されたアウトカムの報告<br>selective outcome reporting | その他のバイアス<br>Other sources of bias | 研究内でのバイアスのリスク<br>Risk of bias within a study |
|         |                            |                                           |                                    | 研究参加者と治療提供者<br>participants and | アウトカム評価者<br>outcome assessors |                                         |                                              |                                   |                                              |
| 3       | Tamakuma 1998              | Unclear risk                              | Unclear risk                       | High risk                       | High risk                     | Unclear risk                            | Unclear risk                                 | Unclear risk                      | High risk                                    |
| 4       | Zeihher 2004               | Low risk                                  | Low risk                           | Low risk                        | Low risk                      | Low risk                                | Unclear risk                                 | Low risk                          | Low risk                                     |
| 6       | Shirai 2006                | Low risk                                  | Low risk                           | High risk                       | High risk                     | Low risk                                | Unclear risk                                 | Low risk                          | Unclear risk                                 |
|         |                            |                                           |                                    |                                 |                               |                                         |                                              |                                   |                                              |
| 番号      | 著者名 発表年<br>(Forest plot表示) | risk of biasコメント                          |                                    |                                 |                               |                                         |                                              |                                   |                                              |
| 3       | Tamakuma 1998              | ランダム化の方法が未記載                              | 割り付け隠蔽化の方法が未記載                     | 盲検化されていない可能性                    | 盲検化されていない可能性                  | 6/20が脱落                                 | 事前に計画されたプロトコルが入手できなかった                       | 情報が不十分                            | high2項目                                      |
| 4       | Zeihher 2004               | 中央でランダム化                                  | 中央で割り付け、薬剤師により外観から薬剤が推定できないようカバーが  | 研究参加者、治療提供者ともブラインド化されている        | アウトカム評価者もブラインド化されている          | データの欠損がない                               | 評価するための十分な情報がない                              | 他のバイアスがない(中間解析で試験中断あり)            | low6項目、high0項目                               |
| 6       | Shirai 2006                | 封筒法で行った                                   | 封筒法で行った                            | 対照群は非使用群                        | 対照群は非使用群                      | 100%フォローされた                             | 事前に計画されたプロトコルが閲覧できなかった                       | この研究には他のバイアスはなし                   | Low 4項目だが、High 2項目あり、Unclearとした              |

## Short term mortality

|               | Random sequence generation (selection bias) | Allocation concealment (selection bias) | Blinding of participants and personnel (performance bias) | Blinding of outcome assessment (detection bias) | Incomplete outcome data (attrition bias) | Selective reporting (reporting bias) | Other bias |
|---------------|---------------------------------------------|-----------------------------------------|-----------------------------------------------------------|-------------------------------------------------|------------------------------------------|--------------------------------------|------------|
| Endo 2006     | ?                                           | +                                       | -                                                         | +                                               | +                                        | ?                                    | ?          |
| Kadoi 2004    | ?                                           | +                                       | +                                                         | +                                               | +                                        | ?                                    | ?          |
| Nakayama 2013 | +                                           | +                                       | -                                                         | -                                               | +                                        | ?                                    | ?          |
| Shirai 2006   | +                                           | +                                       | -                                                         | -                                               | +                                        | ?                                    | +          |
| Tamakuma 1998 | ?                                           | ?                                       | -                                                         | -                                               | ?                                        | ?                                    | ?          |
| Zeihher 2004  | +                                           | +                                       | +                                                         | +                                               | +                                        | ?                                    | +          |

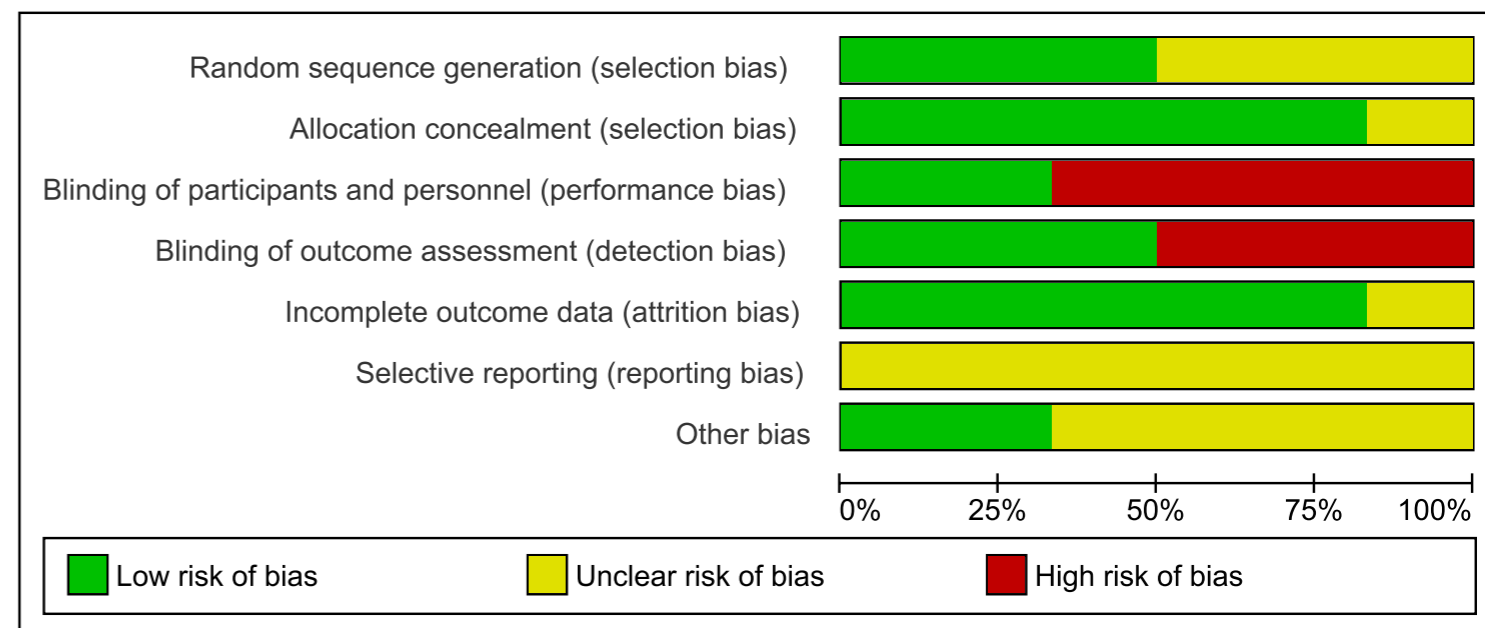

## Severe complication

|               | Random sequence generation (selection bias) | Allocation concealment (selection bias) | Blinding of participants and personnel (performance bias) | Blinding of outcome assessment (detection bias) | Incomplete outcome data (attrition bias) | Selective reporting (reporting bias) | Other bias |
|---------------|---------------------------------------------|-----------------------------------------|-----------------------------------------------------------|-------------------------------------------------|------------------------------------------|--------------------------------------|------------|
| Tamakuma 1998 | ?                                           | ?                                       | -                                                         | -                                               | ?                                        | ?                                    | ?          |
| Zeiber 2004   | +                                           | +                                       | +                                                         | +                                               | +                                        | ?                                    | +          |

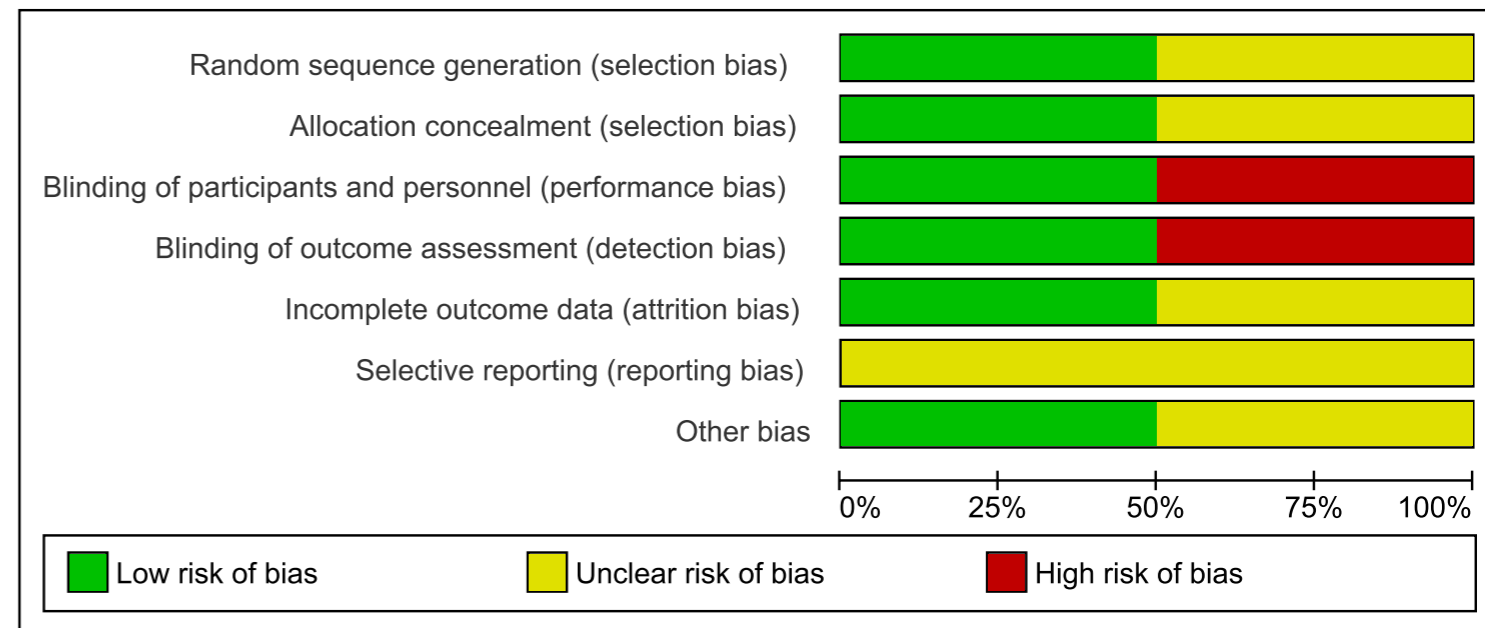

# VFD

|               | Random sequence generation (selection bias) | Allocation concealment (selection bias) | Blinding of participants and personnel (performance bias) | Blinding of outcome assessment (detection bias) | Incomplete outcome data (attrition bias) | Selective reporting (reporting bias) | Other bias |
|---------------|---------------------------------------------|-----------------------------------------|-----------------------------------------------------------|-------------------------------------------------|------------------------------------------|--------------------------------------|------------|
| Shirai 2006   | +                                           | +                                       | -                                                         | -                                               | +                                        | ?                                    | +          |
| Tamakuma 1998 | ?                                           | ?                                       | -                                                         | -                                               | ?                                        | ?                                    | ?          |
| Zeihher 2004  | +                                           | +                                       | +                                                         | +                                               | +                                        | ?                                    | +          |

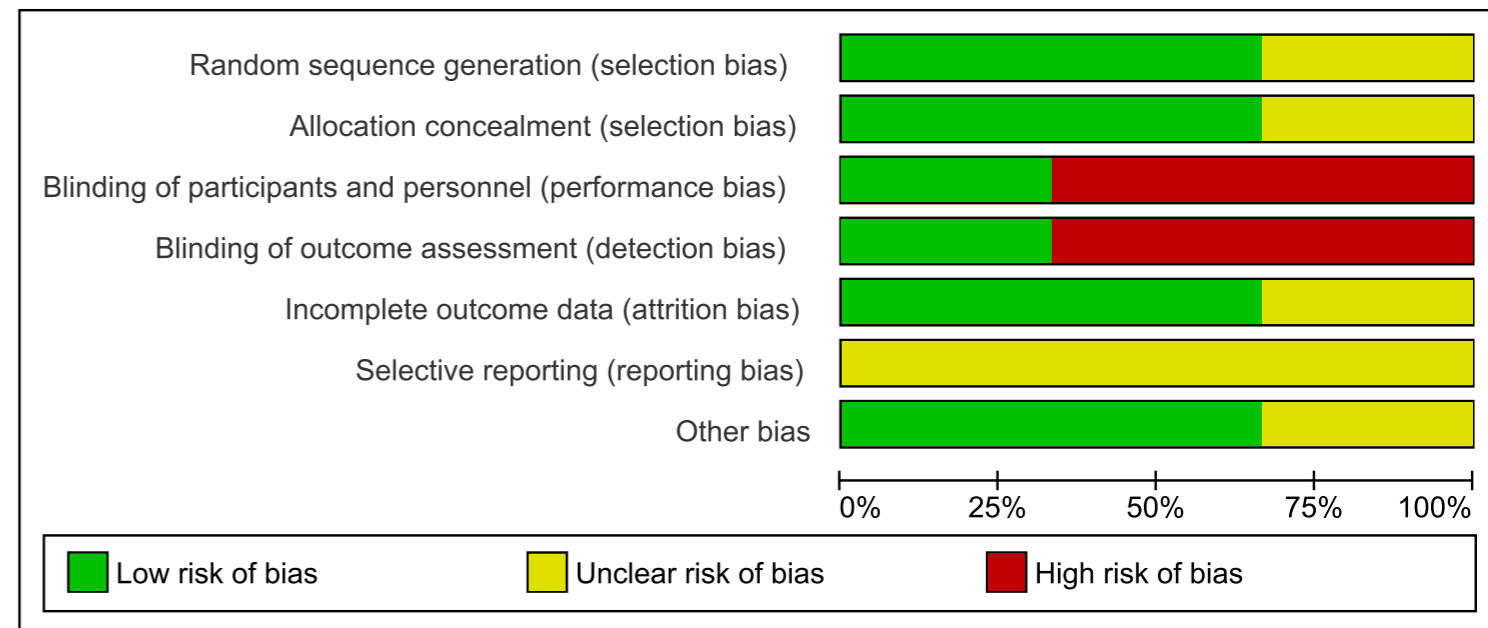



## Short term mortality

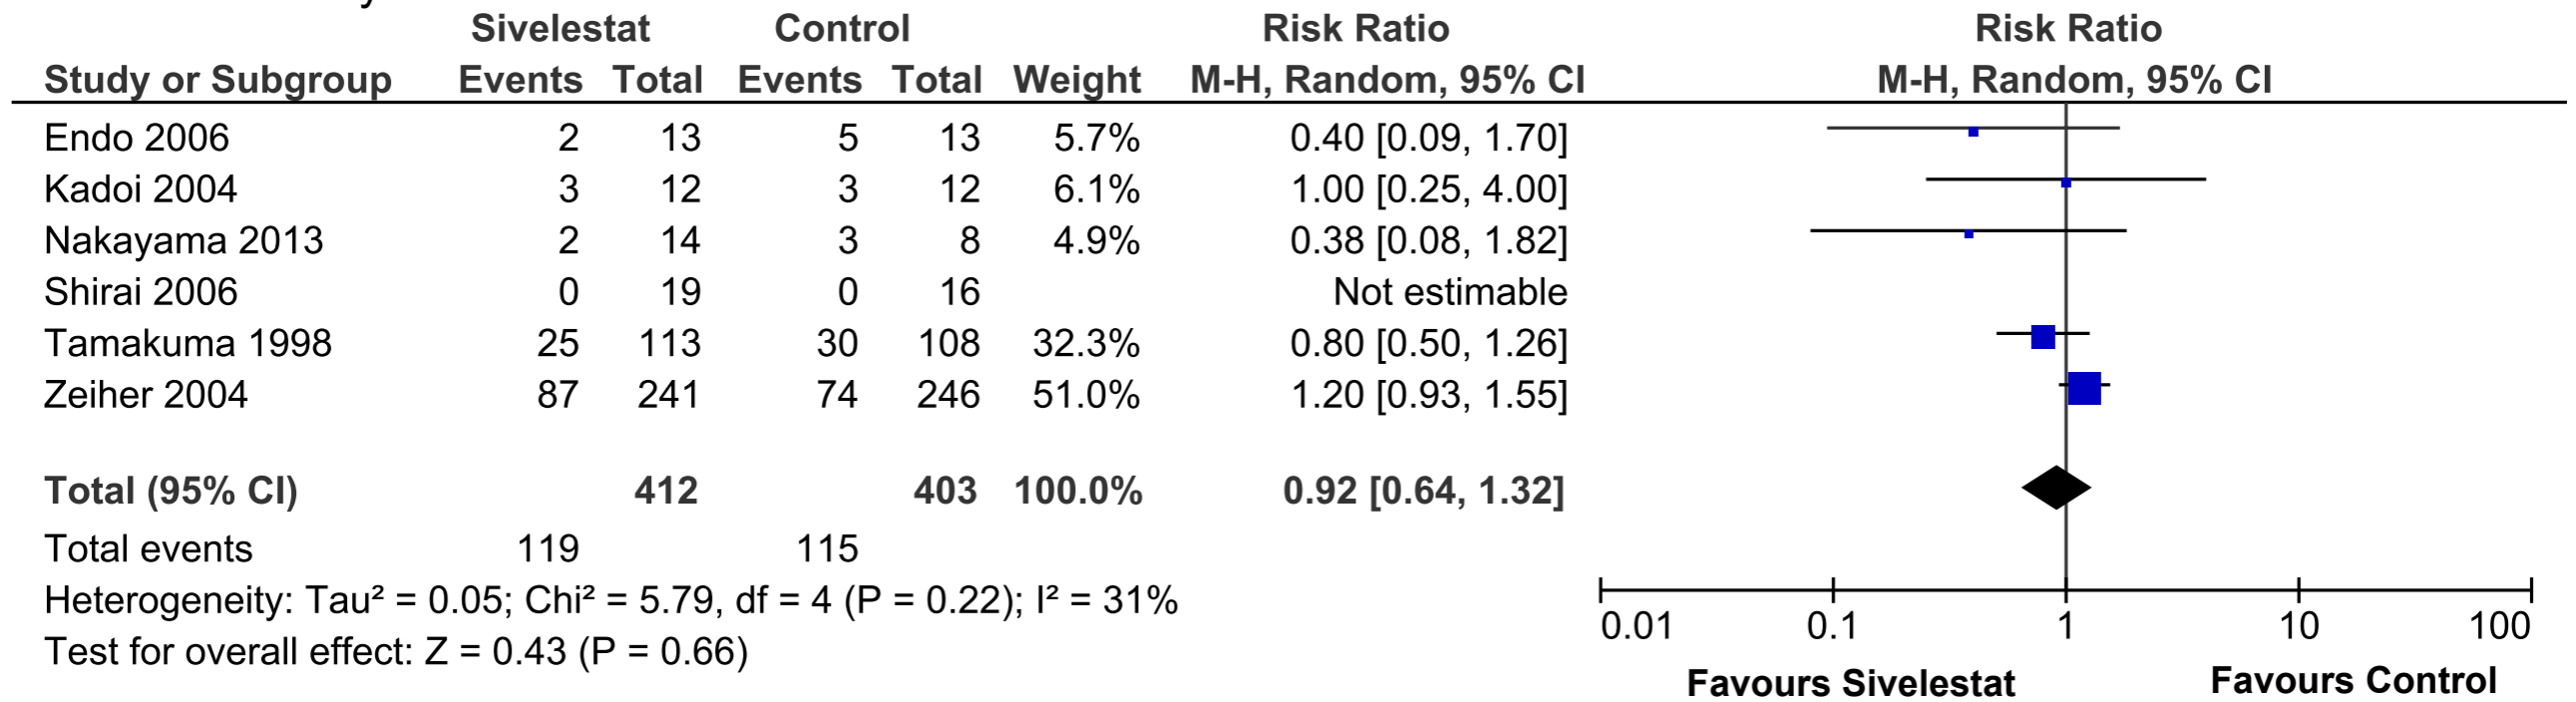

## Severe complication

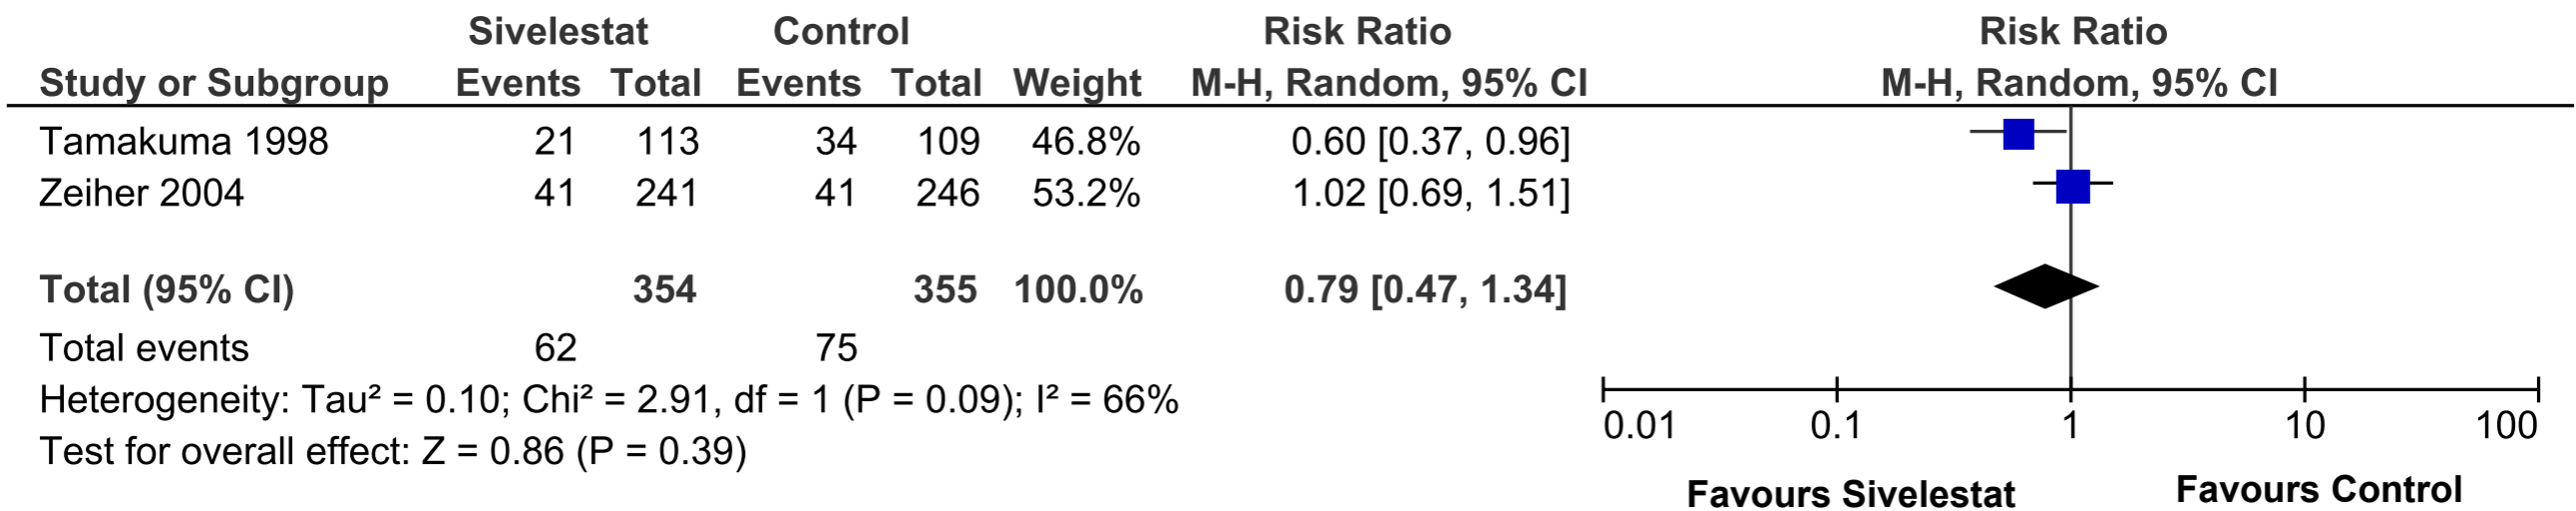

## VFD

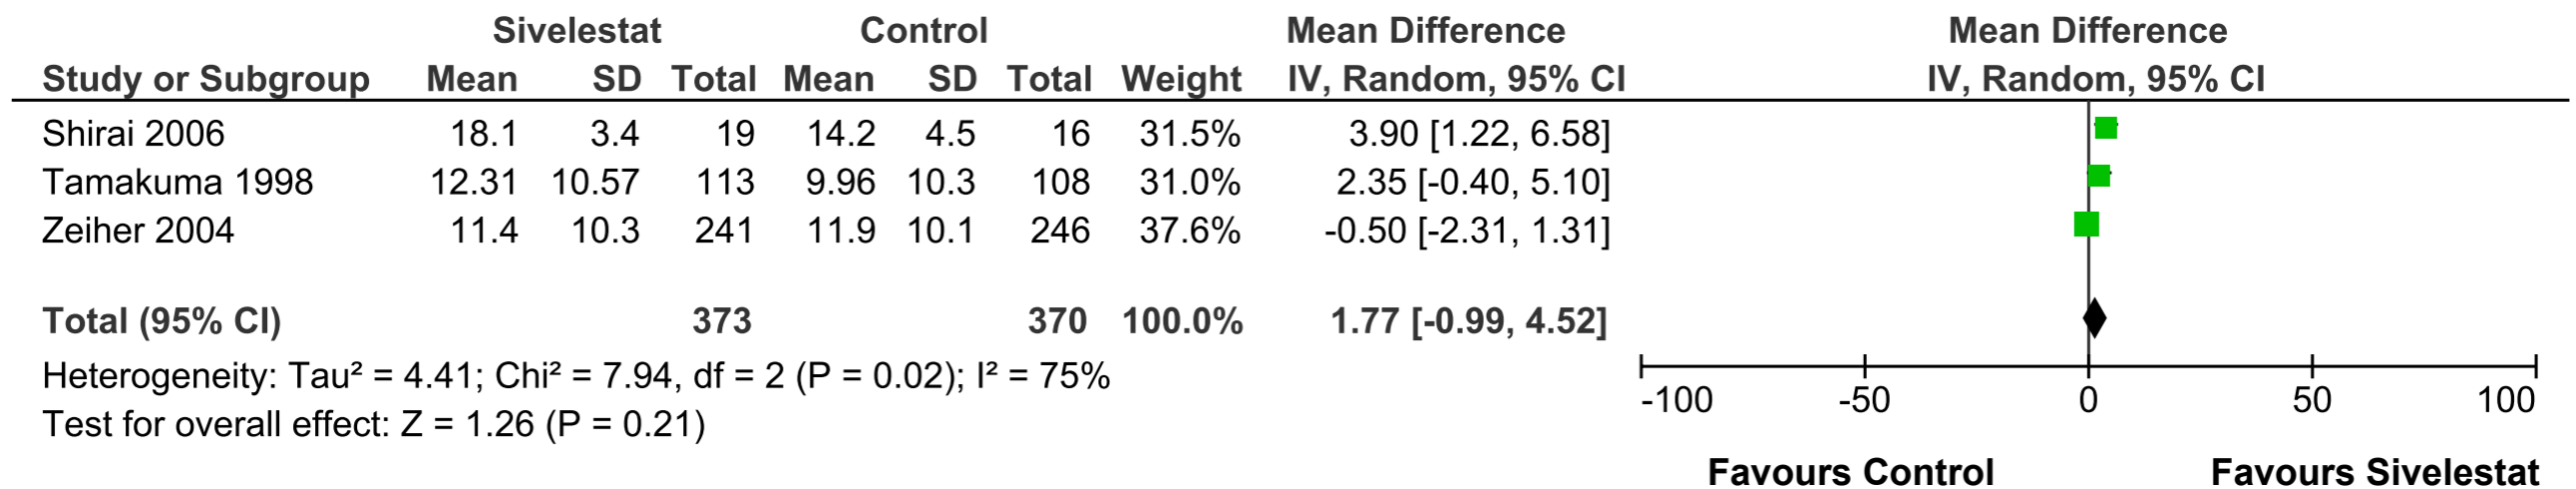

## Summary of findings:

## Sivelestat compared to placebo for adult ARDS

Patient or population: ARDS

Intervention: Sivelestat

Comparison: placebo

| Outcomes               | Anticipated absolute effects* (95% CI) |                                                | Relative effect<br>(95% CI) | No of participants<br>(studies) | Quality of the evidence<br>(GRADE) | Comments |
|------------------------|----------------------------------------|------------------------------------------------|-----------------------------|---------------------------------|------------------------------------|----------|
|                        | Risk with placebo                      | Risk with Sivelestat                           |                             |                                 |                                    |          |
| Short-term mortality   | Study population                       |                                                | RR 0.92<br>(0.64 to 1.32)   | 815<br>(6 RCTs)                 | ⊕○○○<br>VERY LOW <sup>1,2,3</sup>  |          |
|                        | 285 per 1000                           | <b>263 per 1000</b><br>(183 to 377)            |                             |                                 |                                    |          |
|                        | Low risk population                    |                                                |                             |                                 |                                    |          |
|                        | 190 per 1000                           | <b>175 per 1000</b><br>(122 to 251)            |                             |                                 |                                    |          |
| Severe adverse effects | Study population                       |                                                | RR 0.79<br>(0.47 to 1.34)   | 709<br>(2 RCTs)                 | ⊕○○○<br>VERY LOW <sup>1,2,3</sup>  |          |
|                        | 211 per 1000                           | <b>167 per 1000</b><br>(99 to 283)             |                             |                                 |                                    |          |
|                        | Low risk population                    |                                                |                             |                                 |                                    |          |
|                        | 20 per 1000                            | <b>16 per 1000</b><br>(9 to 27)                |                             |                                 |                                    |          |
| VFD                    | High risk population                   |                                                | -                           | 743<br>(3 RCTs)                 | ⊕○○○<br>VERY LOW <sup>1,2,3</sup>  |          |
|                        | 450 per 1000                           | <b>414 per 1000</b><br>(288 to 594)            |                             |                                 |                                    |          |
|                        | Mean 12.0 days                         | 1.77 days more MD<br>(0.99 fewer to 4.52 more) |                             |                                 |                                    |          |

\*The risk in the intervention group (and its 95% confidence interval) is based on the assumed risk in the comparison group and the relative effect of the intervention (and its 95% CI).

CI: Confidence interval; RR: Risk ratio; MD: Mean difference

## GRADE Working Group grades of evidence

**High quality:** We are very confident that the true effect lies close to that of the estimate of the effect

**Moderate quality:** We are moderately confident in the effect estimate: The true effect is likely to be close to the estimate of the effect, but there is a possibility that it is substantially different

**Low quality:** Our confidence in the effect estimate is limited: The true effect may be substantially different from the estimate of the effect

**Very low quality:** We have very little confidence in the effect estimate: The true effect is likely to be substantially different from the estimate of effect

1. A lot of high risk of bias in the blinding procedure
2. High heterogeneity of  $I^2 = 31\%$ ,  $66\%$  and  $75\%$ .
3. Wide range of 95%CI due to a limited number of patients

## CQ 11

**Question:** Should neutrophil elastase inhibitors be used in the treatment of adult patients with ARDS?

| Quality assessment          |                   |                      |                      |              |                      |                      | № of patients       |                     | Effect                 |                                                  | Quality             | Importance |
|-----------------------------|-------------------|----------------------|----------------------|--------------|----------------------|----------------------|---------------------|---------------------|------------------------|--------------------------------------------------|---------------------|------------|
| № of studies                | Study design      | Risk of bias         | Inconsistency        | Indirectness | Imprecision          | Other considerations | Sivelestat for ARDS | Placebo             | Relative (95% CI)      | Absolute (95% CI)                                |                     |            |
| Short-term (<90d) mortality |                   |                      |                      |              |                      |                      |                     |                     |                        |                                                  |                     |            |
| 6                           | Randomised trials | Serious <sup>1</sup> | Serious <sup>2</sup> | Not serious  | Serious <sup>3</sup> | None                 | 119 per 412 (28.9%) | 115 per 403 (28.5%) | RR 0.92 (0.64 to 1.32) | 23 fewer per 1000 (from 91 more to 103 fewer)    | ⊕ ⊖ ⊖ ⊖<br>VERY LOW | CRITICAL   |
|                             |                   |                      |                      |              |                      |                      |                     | 19.0%               |                        | 15 fewer per 1000 (from 61 more to 68 fewer)     |                     |            |
|                             |                   |                      |                      |              |                      |                      |                     | 45.0%               |                        | 36 fewer per 1000 (from 144 more to 162 fewer)   |                     |            |
| Severe adverse effects      |                   |                      |                      |              |                      |                      |                     |                     |                        |                                                  |                     |            |
| 2                           | Randomised trials | Serious <sup>1</sup> | Serious <sup>2</sup> | Not serious  | Serious <sup>3</sup> | None                 | 62 per 354 (17.5%)  | 75 per 355 (21.1%)  | RR 0.79 (0.47 to 1.34) | 44 fewer per 1000 (from 72 more to 112 fewer)    | ⊕ ⊖ ⊖ ⊖<br>VERY LOW | CRITICAL   |
|                             |                   |                      |                      |              |                      |                      |                     | 2.0%                |                        | 4 fewer per 1000 (from 7 more to 11 fewer)       |                     |            |
|                             |                   |                      |                      |              |                      |                      |                     | 24.0%               |                        | 50 fewer per 1000 (from 82 more to 127 fewer)    |                     |            |
| VFD                         |                   |                      |                      |              |                      |                      |                     |                     |                        |                                                  |                     |            |
| 3                           | Randomised trials | Serious <sup>1</sup> | Serious <sup>2</sup> | Not serious  | Serious <sup>3</sup> | None                 | 373                 | 370                 | -                      | MD 1.77 days more (from 0.99 fewer to 4.52 more) | ⊕ ⊖ ⊖ ⊖<br>VERY LOW | CRITICAL   |

CI: Confidence interval; RR: Risk ratio; MD: Mean difference

1. There is a high risk of bias in the blinding procedure
2. High heterogeneity of  $I^2 = 31\%$ ,  $66\%$  and  $75\%$ .
3. Wide range of 95%CI due to a limited number of patients

**Evidence-to-Decision Table**

**CQ11 : Should neutrophil elastase inhibitors be used in the treatment of adult patients with ARDS?**

PATIENTS: ADULT PATIENTS WITH ARDS

INTERVENTION: SIVELESTAT (NEUTROPHIL ELSTASE INHIBITOR)

| CRITERIA                                                                                                                                        | JUDGEMENTS                                                                                                                                                                                                                                                                                                                                              | RESEARCH EVIDENCE                                                                                                                                                                                                                                                                                                                                                                                                                                                                                                                                                                                                                                                                                                                                                                                                                                                                                                                                                                                                                                                                                                                                                                                                                                                                                                                                                                                                                                                                   | ADDITIONAL CONSIDERATION                      |                                                |                                   |                                                  |                             |                                                |                            |                           |                                               |                        |              |                           |                                              |              |                           |                                                |                        |              |                          |                                               |                        |             |                       |                                            |                        |              |                           |                                               |  |                        |                   |                   |                                             |   |  |
|-------------------------------------------------------------------------------------------------------------------------------------------------|---------------------------------------------------------------------------------------------------------------------------------------------------------------------------------------------------------------------------------------------------------------------------------------------------------------------------------------------------------|-------------------------------------------------------------------------------------------------------------------------------------------------------------------------------------------------------------------------------------------------------------------------------------------------------------------------------------------------------------------------------------------------------------------------------------------------------------------------------------------------------------------------------------------------------------------------------------------------------------------------------------------------------------------------------------------------------------------------------------------------------------------------------------------------------------------------------------------------------------------------------------------------------------------------------------------------------------------------------------------------------------------------------------------------------------------------------------------------------------------------------------------------------------------------------------------------------------------------------------------------------------------------------------------------------------------------------------------------------------------------------------------------------------------------------------------------------------------------------------|-----------------------------------------------|------------------------------------------------|-----------------------------------|--------------------------------------------------|-----------------------------|------------------------------------------------|----------------------------|---------------------------|-----------------------------------------------|------------------------|--------------|---------------------------|----------------------------------------------|--------------|---------------------------|------------------------------------------------|------------------------|--------------|--------------------------|-----------------------------------------------|------------------------|-------------|-----------------------|--------------------------------------------|------------------------|--------------|---------------------------|-----------------------------------------------|--|------------------------|-------------------|-------------------|---------------------------------------------|---|--|
| <b>PROBLEM</b><br><br>Is the problem a priority?                                                                                                | <input type="radio"/> No<br><input type="radio"/> Probably no<br><input type="radio"/> Probably yes<br><input checked="" type="radio"/> Yes<br>-----<br><input type="radio"/> Varies<br><input type="radio"/> Don't know                                                                                                                                | The pathogenesis of acute respiratory distress syndrome (ARDS) is pulmonary edema caused by increased permeability associated with nonspecific alveolar inflammation. Neutrophil elastase is thought to be one of the most important mediators related to the pathogenesis of ARDS (1, 2). A neutrophil elastase inhibitor, available for clinical use in Japan, has been intensively investigated as a treatment option to improve the prognosis of patients with ARDS. Several meta-analyses showed that a neutrophil elastase inhibitor did not improve mortality (3), while other studies suggested its potential benefits (4). This discrepancy indicates the importance of this issue. Since a neutrophil elastase inhibitor is reimbursed by the national health insurance system and is widely administered in Japan, the priority of this issue is high.                                                                                                                                                                                                                                                                                                                                                                                                                                                                                                                                                                                                                   |                                               |                                                |                                   |                                                  |                             |                                                |                            |                           |                                               |                        |              |                           |                                              |              |                           |                                                |                        |              |                          |                                               |                        |             |                       |                                            |                        |              |                           |                                               |  |                        |                   |                   |                                             |   |  |
|                                                                                                                                                 | What is the overall certainty of the evidence of effects?<br><input checked="" type="radio"/> Very low<br><input type="radio"/> Low<br><input type="radio"/> Moderate<br><input type="radio"/> High<br>-----<br><input type="radio"/> No included studies                                                                                               | <b>The relative importance or values of the main outcomes of interest:</b> <table border="1" style="width: 100%; border-collapse: collapse;"> <thead> <tr> <th>Outcomes</th> <th>Relative importance</th> <th>Certainty of the evidence (GRADE)</th> </tr> </thead> <tbody> <tr> <td>Mortality (short term)<br/><small>(Note1)</small></td> <td>CRITICAL</td> <td>⊕⊕⊕⊕<br/>VERY LOW</td> </tr> <tr> <td>Significant adverse events</td> <td>CRITICAL</td> <td>⊕⊕⊕⊕<br/>VERY LOW</td> </tr> <tr> <td>VFD<sup>(Note2)</sup></td> <td>IMPORTANT</td> <td>⊕⊕⊕⊕<br/>VERY LOW</td> </tr> </tbody> </table>                                                                                                                                                                                                                                                                                                                                                                                                                                                                                                                                                                                                                                                                                                                                                                                                                                                                                | Outcomes                                      | Relative importance                            | Certainty of the evidence (GRADE) | Mortality (short term)<br><small>(Note1)</small> | CRITICAL                    | ⊕⊕⊕⊕<br>VERY LOW                               | Significant adverse events | CRITICAL                  | ⊕⊕⊕⊕<br>VERY LOW                              | VFD <sup>(Note2)</sup> | IMPORTANT    | ⊕⊕⊕⊕<br>VERY LOW          |                                              |              |                           |                                                |                        |              |                          |                                               |                        |             |                       |                                            |                        |              |                           |                                               |  |                        |                   |                   |                                             |   |  |
| Outcomes                                                                                                                                        | Relative importance                                                                                                                                                                                                                                                                                                                                     | Certainty of the evidence (GRADE)                                                                                                                                                                                                                                                                                                                                                                                                                                                                                                                                                                                                                                                                                                                                                                                                                                                                                                                                                                                                                                                                                                                                                                                                                                                                                                                                                                                                                                                   |                                               |                                                |                                   |                                                  |                             |                                                |                            |                           |                                               |                        |              |                           |                                              |              |                           |                                                |                        |              |                          |                                               |                        |             |                       |                                            |                        |              |                           |                                               |  |                        |                   |                   |                                             |   |  |
| Mortality (short term)<br><small>(Note1)</small>                                                                                                | CRITICAL                                                                                                                                                                                                                                                                                                                                                | ⊕⊕⊕⊕<br>VERY LOW                                                                                                                                                                                                                                                                                                                                                                                                                                                                                                                                                                                                                                                                                                                                                                                                                                                                                                                                                                                                                                                                                                                                                                                                                                                                                                                                                                                                                                                                    |                                               |                                                |                                   |                                                  |                             |                                                |                            |                           |                                               |                        |              |                           |                                              |              |                           |                                                |                        |              |                          |                                               |                        |             |                       |                                            |                        |              |                           |                                               |  |                        |                   |                   |                                             |   |  |
| Significant adverse events                                                                                                                      | CRITICAL                                                                                                                                                                                                                                                                                                                                                | ⊕⊕⊕⊕<br>VERY LOW                                                                                                                                                                                                                                                                                                                                                                                                                                                                                                                                                                                                                                                                                                                                                                                                                                                                                                                                                                                                                                                                                                                                                                                                                                                                                                                                                                                                                                                                    |                                               |                                                |                                   |                                                  |                             |                                                |                            |                           |                                               |                        |              |                           |                                              |              |                           |                                                |                        |              |                          |                                               |                        |             |                       |                                            |                        |              |                           |                                               |  |                        |                   |                   |                                             |   |  |
| VFD <sup>(Note2)</sup>                                                                                                                          | IMPORTANT                                                                                                                                                                                                                                                                                                                                               | ⊕⊕⊕⊕<br>VERY LOW                                                                                                                                                                                                                                                                                                                                                                                                                                                                                                                                                                                                                                                                                                                                                                                                                                                                                                                                                                                                                                                                                                                                                                                                                                                                                                                                                                                                                                                                    |                                               |                                                |                                   |                                                  |                             |                                                |                            |                           |                                               |                        |              |                           |                                              |              |                           |                                                |                        |              |                          |                                               |                        |             |                       |                                            |                        |              |                           |                                               |  |                        |                   |                   |                                             |   |  |
| <b>DESIRABLE AND UNDESIRABLE EFFECTS</b><br><br>Is there important uncertainty about or variability in how much people value the main outcomes? | <input type="radio"/> Important uncertainty or variability<br><input checked="" type="radio"/> Possibly important uncertainty or variability<br><input type="radio"/> Possibly no important uncertainty or variability<br><input type="radio"/> No important uncertainty or variability<br>-----<br><input type="radio"/> No known undesirable outcomes | <b>Summary of findings:</b> <table border="1" style="width: 100%; border-collapse: collapse;"> <thead> <tr> <th>Outcome</th> <th>Risk with placebo</th> <th>Risk with intervention</th> <th>Absolute effect (95% CI)</th> <th>Relative risk (RR) (95% CI)</th> </tr> </thead> <tbody> <tr> <td rowspan="3">Short-term (&lt;90d) mortality<sup>(Note1)</sup></td> <td>285 per 1000</td> <td>263 per 1000 (183 to 377)</td> <td>23 fewer per 1000 (from 91 more to 103 fewer)</td> <td rowspan="3">RR 0.92 (0.64 to 1.32)</td> </tr> <tr> <td>190 per 1000</td> <td>175 per 1000 (122 to 251)</td> <td>15 fewer per 1000 (from 61 more to 68 fewer)</td> </tr> <tr> <td>450 per 1000</td> <td>414 per 1000 (288 to 594)</td> <td>36 fewer per 1000 (from 144 more to 162 fewer)</td> </tr> <tr> <td rowspan="2">Severe adverse effects</td> <td>211 per 1000</td> <td>167 per 1000 (99 to 283)</td> <td>44 fewer per 1000 (from 72 more to 112 fewer)</td> <td rowspan="2">RR 0.79 (0.47 to 1.34)</td> </tr> <tr> <td>20 per 1000</td> <td>16 per 1000 (9 to 27)</td> <td>4 fewer per 1000 (from 7 more to 11 fewer)</td> </tr> <tr> <td>VFD<sup>(Note2)</sup></td> <td>240 per 1000</td> <td>190 per 1000 (113 to 322)</td> <td>50 fewer per 1000 (from 82 more to 127 fewer)</td> <td></td> </tr> <tr> <td>VFD<sup>(Note2)</sup></td> <td>Average 12.0 days</td> <td>Average 13.8 days</td> <td>MD 1.77 more (from 0.99 fewer to 4.52 more)</td> <td>-</td> </tr> </tbody> </table> | Outcome                                       | Risk with placebo                              | Risk with intervention            | Absolute effect (95% CI)                         | Relative risk (RR) (95% CI) | Short-term (<90d) mortality <sup>(Note1)</sup> | 285 per 1000               | 263 per 1000 (183 to 377) | 23 fewer per 1000 (from 91 more to 103 fewer) | RR 0.92 (0.64 to 1.32) | 190 per 1000 | 175 per 1000 (122 to 251) | 15 fewer per 1000 (from 61 more to 68 fewer) | 450 per 1000 | 414 per 1000 (288 to 594) | 36 fewer per 1000 (from 144 more to 162 fewer) | Severe adverse effects | 211 per 1000 | 167 per 1000 (99 to 283) | 44 fewer per 1000 (from 72 more to 112 fewer) | RR 0.79 (0.47 to 1.34) | 20 per 1000 | 16 per 1000 (9 to 27) | 4 fewer per 1000 (from 7 more to 11 fewer) | VFD <sup>(Note2)</sup> | 240 per 1000 | 190 per 1000 (113 to 322) | 50 fewer per 1000 (from 82 more to 127 fewer) |  | VFD <sup>(Note2)</sup> | Average 12.0 days | Average 13.8 days | MD 1.77 more (from 0.99 fewer to 4.52 more) | - |  |
|                                                                                                                                                 | Outcome                                                                                                                                                                                                                                                                                                                                                 | Risk with placebo                                                                                                                                                                                                                                                                                                                                                                                                                                                                                                                                                                                                                                                                                                                                                                                                                                                                                                                                                                                                                                                                                                                                                                                                                                                                                                                                                                                                                                                                   | Risk with intervention                        | Absolute effect (95% CI)                       | Relative risk (RR) (95% CI)       |                                                  |                             |                                                |                            |                           |                                               |                        |              |                           |                                              |              |                           |                                                |                        |              |                          |                                               |                        |             |                       |                                            |                        |              |                           |                                               |  |                        |                   |                   |                                             |   |  |
|                                                                                                                                                 | Short-term (<90d) mortality <sup>(Note1)</sup>                                                                                                                                                                                                                                                                                                          | 285 per 1000                                                                                                                                                                                                                                                                                                                                                                                                                                                                                                                                                                                                                                                                                                                                                                                                                                                                                                                                                                                                                                                                                                                                                                                                                                                                                                                                                                                                                                                                        | 263 per 1000 (183 to 377)                     | 23 fewer per 1000 (from 91 more to 103 fewer)  | RR 0.92 (0.64 to 1.32)            |                                                  |                             |                                                |                            |                           |                                               |                        |              |                           |                                              |              |                           |                                                |                        |              |                          |                                               |                        |             |                       |                                            |                        |              |                           |                                               |  |                        |                   |                   |                                             |   |  |
|                                                                                                                                                 |                                                                                                                                                                                                                                                                                                                                                         | 190 per 1000                                                                                                                                                                                                                                                                                                                                                                                                                                                                                                                                                                                                                                                                                                                                                                                                                                                                                                                                                                                                                                                                                                                                                                                                                                                                                                                                                                                                                                                                        | 175 per 1000 (122 to 251)                     | 15 fewer per 1000 (from 61 more to 68 fewer)   |                                   |                                                  |                             |                                                |                            |                           |                                               |                        |              |                           |                                              |              |                           |                                                |                        |              |                          |                                               |                        |             |                       |                                            |                        |              |                           |                                               |  |                        |                   |                   |                                             |   |  |
|                                                                                                                                                 |                                                                                                                                                                                                                                                                                                                                                         | 450 per 1000                                                                                                                                                                                                                                                                                                                                                                                                                                                                                                                                                                                                                                                                                                                                                                                                                                                                                                                                                                                                                                                                                                                                                                                                                                                                                                                                                                                                                                                                        | 414 per 1000 (288 to 594)                     | 36 fewer per 1000 (from 144 more to 162 fewer) |                                   |                                                  |                             |                                                |                            |                           |                                               |                        |              |                           |                                              |              |                           |                                                |                        |              |                          |                                               |                        |             |                       |                                            |                        |              |                           |                                               |  |                        |                   |                   |                                             |   |  |
| Severe adverse effects                                                                                                                          | 211 per 1000                                                                                                                                                                                                                                                                                                                                            | 167 per 1000 (99 to 283)                                                                                                                                                                                                                                                                                                                                                                                                                                                                                                                                                                                                                                                                                                                                                                                                                                                                                                                                                                                                                                                                                                                                                                                                                                                                                                                                                                                                                                                            | 44 fewer per 1000 (from 72 more to 112 fewer) | RR 0.79 (0.47 to 1.34)                         |                                   |                                                  |                             |                                                |                            |                           |                                               |                        |              |                           |                                              |              |                           |                                                |                        |              |                          |                                               |                        |             |                       |                                            |                        |              |                           |                                               |  |                        |                   |                   |                                             |   |  |
|                                                                                                                                                 | 20 per 1000                                                                                                                                                                                                                                                                                                                                             | 16 per 1000 (9 to 27)                                                                                                                                                                                                                                                                                                                                                                                                                                                                                                                                                                                                                                                                                                                                                                                                                                                                                                                                                                                                                                                                                                                                                                                                                                                                                                                                                                                                                                                               | 4 fewer per 1000 (from 7 more to 11 fewer)    |                                                |                                   |                                                  |                             |                                                |                            |                           |                                               |                        |              |                           |                                              |              |                           |                                                |                        |              |                          |                                               |                        |             |                       |                                            |                        |              |                           |                                               |  |                        |                   |                   |                                             |   |  |
| VFD <sup>(Note2)</sup>                                                                                                                          | 240 per 1000                                                                                                                                                                                                                                                                                                                                            | 190 per 1000 (113 to 322)                                                                                                                                                                                                                                                                                                                                                                                                                                                                                                                                                                                                                                                                                                                                                                                                                                                                                                                                                                                                                                                                                                                                                                                                                                                                                                                                                                                                                                                           | 50 fewer per 1000 (from 82 more to 127 fewer) |                                                |                                   |                                                  |                             |                                                |                            |                           |                                               |                        |              |                           |                                              |              |                           |                                                |                        |              |                          |                                               |                        |             |                       |                                            |                        |              |                           |                                               |  |                        |                   |                   |                                             |   |  |
| VFD <sup>(Note2)</sup>                                                                                                                          | Average 12.0 days                                                                                                                                                                                                                                                                                                                                       | Average 13.8 days                                                                                                                                                                                                                                                                                                                                                                                                                                                                                                                                                                                                                                                                                                                                                                                                                                                                                                                                                                                                                                                                                                                                                                                                                                                                                                                                                                                                                                                                   | MD 1.77 more (from 0.99 fewer to 4.52 more)   | -                                              |                                   |                                                  |                             |                                                |                            |                           |                                               |                        |              |                           |                                              |              |                           |                                                |                        |              |                          |                                               |                        |             |                       |                                            |                        |              |                           |                                               |  |                        |                   |                   |                                             |   |  |
| How substantial are the desirable anticipated effects?                                                                                          | <input type="radio"/> Trivial<br><input type="radio"/> Small<br><input type="radio"/> Moderate<br><input type="radio"/> Large<br>-----<br><input checked="" type="radio"/> Varies<br><input type="radio"/> Don't know                                                                                                                                   |                                                                                                                                                                                                                                                                                                                                                                                                                                                                                                                                                                                                                                                                                                                                                                                                                                                                                                                                                                                                                                                                                                                                                                                                                                                                                                                                                                                                                                                                                     |                                               |                                                |                                   |                                                  |                             |                                                |                            |                           |                                               |                        |              |                           |                                              |              |                           |                                                |                        |              |                          |                                               |                        |             |                       |                                            |                        |              |                           |                                               |  |                        |                   |                   |                                             |   |  |
| How substantial are the undesirable anticipated effects?                                                                                        | <input type="radio"/> Large<br><input type="radio"/> Moderate<br><input type="radio"/> Small<br><input type="radio"/> Trivial<br>-----<br><input checked="" type="radio"/> Varies<br><input type="radio"/> Don't know                                                                                                                                   |                                                                                                                                                                                                                                                                                                                                                                                                                                                                                                                                                                                                                                                                                                                                                                                                                                                                                                                                                                                                                                                                                                                                                                                                                                                                                                                                                                                                                                                                                     |                                               |                                                |                                   |                                                  |                             |                                                |                            |                           |                                               |                        |              |                           |                                              |              |                           |                                                |                        |              |                          |                                               |                        |             |                       |                                            |                        |              |                           |                                               |  |                        |                   |                   |                                             |   |  |
| Does the balance between desirable and undesirable effects favor the intervention?                                                              | <input type="radio"/> Favors the comparison<br><input type="radio"/> Probably favors the comparison<br><input type="radio"/> Does not favor either the intervention or                                                                                                                                                                                  | Summary : Neutrophil elastase inhibitor had no effect on short-term (<90d) mortality, the incidence of significant adverse events or the number of VFD. Certainty of the evidence 「VERY LOW」                                                                                                                                                                                                                                                                                                                                                                                                                                                                                                                                                                                                                                                                                                                                                                                                                                                                                                                                                                                                                                                                                                                                                                                                                                                                                        |                                               |                                                |                                   |                                                  |                             |                                                |                            |                           |                                               |                        |              |                           |                                              |              |                           |                                                |                        |              |                          |                                               |                        |             |                       |                                            |                        |              |                           |                                               |  |                        |                   |                   |                                             |   |  |

|                    |                                                                                                         |                                                                                                                                                                                                                                                                                                                                                                                                                                        |                                                                                                                                                                                                                                                                                                         |  |
|--------------------|---------------------------------------------------------------------------------------------------------|----------------------------------------------------------------------------------------------------------------------------------------------------------------------------------------------------------------------------------------------------------------------------------------------------------------------------------------------------------------------------------------------------------------------------------------|---------------------------------------------------------------------------------------------------------------------------------------------------------------------------------------------------------------------------------------------------------------------------------------------------------|--|
|                    | <p><b>or the comparison?</b></p>                                                                        | <p>the comparison<br/> <input type="radio"/> Probably favors the intervention<br/> <input type="radio"/> Favors the intervention<br/>                 -----<br/> <input checked="" type="radio"/> Varies<br/> <input type="radio"/> Don't know</p>                                                                                                                                                                                     |                                                                                                                                                                                                                                                                                                         |  |
| RESOURCES REQUIRED | <p><b>How large are the resource requirements (costs)?</b></p>                                          | <p><input type="radio"/> Large costs<br/> <input checked="" type="radio"/> Moderate costs<br/> <input type="radio"/> Negligible costs and savings<br/> <input type="radio"/> Moderate savings<br/> <input type="radio"/> Large savings<br/>                 -----<br/> <input type="radio"/> Varies<br/> <input type="radio"/> Don't know</p>                                                                                          | <p>Since neutrophil elastase inhibitors are administered intravenously through peripheral venous catheters, limited equipment is necessary. However, additional costs are required to buy this drug.</p> <p>Neutrophil elastase inhibitor <span style="float: right;">6,216 – 13,551 JPY/day</span></p> |  |
|                    | <p><b>Does the cost effectiveness of the intervention favor the intervention or the comparison?</b></p> | <p><input type="radio"/> Favors the comparison<br/> <input checked="" type="radio"/> Probably favors the comparison<br/> <input type="radio"/> Does not favor either the intervention or the comparison<br/> <input type="radio"/> Probably favors the intervention<br/> <input type="radio"/> Favors the intervention<br/>                 -----<br/> <input type="radio"/> Varies<br/> <input type="radio"/> No included studies</p> | <p>The efficacy of this drug has not been confirmed, and additional expenses are necessary to buy this drug.</p>                                                                                                                                                                                        |  |
| EQUITY             | <p><b>What would be the impact on health equity?</b></p>                                                | <p><input type="radio"/> Reduced<br/> <input checked="" type="radio"/> Probably reduced<br/> <input type="radio"/> Probably no impact<br/> <input type="radio"/> Probably increased<br/> <input type="radio"/> Increased<br/>                 -----<br/> <input type="radio"/> Varies<br/> <input type="radio"/> Don't know</p>                                                                                                        | <p>Since no specialized medical facilities or equipment are necessary, the health equity may be adjusted.</p>                                                                                                                                                                                           |  |
| ACCEPTABILITY      | <p><b>Is the option acceptable to key stakeholders?</b></p>                                             | <p><input type="radio"/> No<br/> <input type="radio"/> Probably no<br/> <input type="radio"/> Probably yes<br/> <input type="radio"/> Yes<br/>                 -----<br/> <input type="radio"/> Varies<br/> <input checked="" type="radio"/> Don't know</p>                                                                                                                                                                            | <p>It is unclear whether it will be accepted by key stakeholders, because this drug is expensive.</p>                                                                                                                                                                                                   |  |
| FEASIBILITY        | <p><b>Is the intervention feasible implement?</b></p>                                                   | <p><input type="radio"/> No<br/> <input type="radio"/> Probably no<br/> <input checked="" type="radio"/> Probably yes<br/> <input type="radio"/> Yes<br/>                 -----<br/> <input type="radio"/> Varies<br/> <input type="radio"/> Don't know</p>                                                                                                                                                                            | <p>The intervention is feasible to implement, because this drug can be administered intravenously and does not require specialized medical facilities or equipment.</p>                                                                                                                                 |  |

## Recommendation

### CQ11 : Should neutrophil elastase inhibitors be used in the treatment of adult patients with ARDS?

| Balance of consequences | Undesirable consequences clearly outweigh desirable consequences in most settings | Undesirable consequences probably outweigh desirable consequences in most settings | The balance between desirable and undesirable consequences is closely balanced or uncertain | Desirable consequences probably outweigh undesirable consequences in most settings | Desirable consequences clearly outweigh undesirable consequences in most settings |
|-------------------------|-----------------------------------------------------------------------------------|------------------------------------------------------------------------------------|---------------------------------------------------------------------------------------------|------------------------------------------------------------------------------------|-----------------------------------------------------------------------------------|
| Judgement               | ○                                                                                 | ○                                                                                  | ●                                                                                           | ○                                                                                  | ○                                                                                 |

| Type of recommendation | Strong recommendation against the intervention | Conditional recommendation against the intervention | Conditional recommendation for either the intervention or the comparison | Conditional recommendation for the intervention |
|------------------------|------------------------------------------------|-----------------------------------------------------|--------------------------------------------------------------------------|-------------------------------------------------|
| Judgement              | ○                                              | ●                                                   | ○                                                                        | ○                                               |

|                                          |                                                                                                                                                                                                                                                                                                                                                                                                                                                                                                                                                                                                                                                                                                                                                                                                                                                                                                                                                                                                                                                                                                                                                                                                                                                                                                                                                                                                                                                                                                                                                                                                                                                                                                                                                                                                                                                                                                                                                                                                                                                                                                                                                                                                                                                                                                                                                                                                                                                                              |
|------------------------------------------|------------------------------------------------------------------------------------------------------------------------------------------------------------------------------------------------------------------------------------------------------------------------------------------------------------------------------------------------------------------------------------------------------------------------------------------------------------------------------------------------------------------------------------------------------------------------------------------------------------------------------------------------------------------------------------------------------------------------------------------------------------------------------------------------------------------------------------------------------------------------------------------------------------------------------------------------------------------------------------------------------------------------------------------------------------------------------------------------------------------------------------------------------------------------------------------------------------------------------------------------------------------------------------------------------------------------------------------------------------------------------------------------------------------------------------------------------------------------------------------------------------------------------------------------------------------------------------------------------------------------------------------------------------------------------------------------------------------------------------------------------------------------------------------------------------------------------------------------------------------------------------------------------------------------------------------------------------------------------------------------------------------------------------------------------------------------------------------------------------------------------------------------------------------------------------------------------------------------------------------------------------------------------------------------------------------------------------------------------------------------------------------------------------------------------------------------------------------------------|
| Recommendation                           | <b>We do not suggest the use of neutrophil elastase inhibitors in adult patients with ARDS. (GRADE 2D, Strength of recommendation “weak recommendation” / Quality of evidence “very low”)</b>                                                                                                                                                                                                                                                                                                                                                                                                                                                                                                                                                                                                                                                                                                                                                                                                                                                                                                                                                                                                                                                                                                                                                                                                                                                                                                                                                                                                                                                                                                                                                                                                                                                                                                                                                                                                                                                                                                                                                                                                                                                                                                                                                                                                                                                                                |
| Justification                            | <p><b>Clinical question:</b> Should neutrophil elastase inhibitors be used in the treatment of adult patients with ARDS?</p> <p><b>Patient or population :</b> Adult patients with ARDS</p> <p><b>Intervention :</b> Sivelestat (Neutrophil elastase inhibitor)</p> <p><b>Comparison :</b> Placebo</p> <p><b>Outcomes:</b> Mortality (short term)<sup>Note 1</sup>, Significant adverse events, VFD<sup>Note 2</sup></p> <p><b>Summary of the evidence:</b> A total of six randomized clinical trials (RCTs, 815 patients) were selected in a systematic review. Meta-analysis demonstrated that neutrophil elastase inhibitors did not improve the short-term (&lt;90 days) mortality (RR 0.92, 95%CI 0.64-1.32), the rate of severe adverse effects (RR 0.79, 95%CI 0.47-1.34) or number of ventilation-free days (VFD) (Mean 1.58 days more, 95%CI 2.72 days fewer to 5.89 days more).</p> <p><b>Quality of evidence:</b> Many studies had a high risk of bias in blinding. Moderate to severe inconsistency was observed for (short-term (&lt;90 days) mortality, <math>I^2 = 31\%</math>; and severe adverse effects, <math>I^2 = 31\%</math>; VFD, <math>I^2 = 86\%</math>). No indirectness was observed. Since the number of patients was less than optimal for the information size resulting in a large 95%CI, the imprecision of this meta-analysis was high. Publication bias could not be determined because of the small number of reported studies.</p> <p><b>Judgement of benefit and harm, resources and cost:</b> Systematic review demonstrated that neither efficacy nor significant adverse effects were found. The benefit was considered to be low compared to the increase in cost.</p> <p><b>Recommendations:</b> We do not suggest the use of neutrophil elastase inhibitors in adult patients with ARDS. (GRADE 2D, Strength of recommendation “weak recommendation” / Quality of evidence “very low”)</p> <p><b>Additional Considerations:</b> Neutrophil elastase inhibitors are reimbursed by the national health insurance system in Japan to treat patients with ARDS with the proviso that the use of neutrophil elastase inhibitors is not recommended in patients with multiple organ failure (four or more organs), burn injuries, or trauma. A nationwide survey conducted by the Japanese Respiratory Society in 2010 showed that neutrophil elastase inhibitors are widely used in Japan for the treatment of patients with ARDS.</p> |
| Subgroup considerations                  | None                                                                                                                                                                                                                                                                                                                                                                                                                                                                                                                                                                                                                                                                                                                                                                                                                                                                                                                                                                                                                                                                                                                                                                                                                                                                                                                                                                                                                                                                                                                                                                                                                                                                                                                                                                                                                                                                                                                                                                                                                                                                                                                                                                                                                                                                                                                                                                                                                                                                         |
| Implementation considerations            | Because of a lot of drug incompatibilities, separated infusion lines are often necessary.                                                                                                                                                                                                                                                                                                                                                                                                                                                                                                                                                                                                                                                                                                                                                                                                                                                                                                                                                                                                                                                                                                                                                                                                                                                                                                                                                                                                                                                                                                                                                                                                                                                                                                                                                                                                                                                                                                                                                                                                                                                                                                                                                                                                                                                                                                                                                                                    |
| Monitoring and evaluation considerations | Cardiorespiratory monitoring and blood tests are necessary to identify the onset of adverse effects.                                                                                                                                                                                                                                                                                                                                                                                                                                                                                                                                                                                                                                                                                                                                                                                                                                                                                                                                                                                                                                                                                                                                                                                                                                                                                                                                                                                                                                                                                                                                                                                                                                                                                                                                                                                                                                                                                                                                                                                                                                                                                                                                                                                                                                                                                                                                                                         |
| Research possibilities                   | Due to the limited number of high-quality RCTs, large-scale, high-quality clinical trials are necessary to demonstrate the efficacy of neutrophil elastase inhibitors in adult patients with ARDS.                                                                                                                                                                                                                                                                                                                                                                                                                                                                                                                                                                                                                                                                                                                                                                                                                                                                                                                                                                                                                                                                                                                                                                                                                                                                                                                                                                                                                                                                                                                                                                                                                                                                                                                                                                                                                                                                                                                                                                                                                                                                                                                                                                                                                                                                           |

Note 1) Short-term (<90 days) mortality indicates death within 90 days, which was analyzed as the main outcome in each study.

Note 2) Ventilation-free days (VFD) indicates the number of days without a ventilator support during a 28-day period. If patients died within 28 days, VFD was defined as zero.

**References**

1. Donnelly SC, MacGregor I, Zamani A, et al. Plasma elastase levels and the development of the adult respiratory distress syndrome. *Am J Respir Crit Care Med* **151**(5): 1428-33, 1995. PMID 7735596
2. Moraes TJ, Chow CW, Downey GP. Proteases and lung injury. *Crit Care Med* **31**(4 Suppl): S189-94, 2003. PMID 12682439
3. Iwata K, Doi A, Ohji G, et al. Effect of neutrophil elastase inhibitor (sivelestat sodium) in the treatment of acute lung injury (ALI) and acute respiratory distress syndrome (ARDS): a systematic review and meta-analysis. *Intern Med* **49**(22): 2423-32, 2010. PMID 21088343
4. Aikawa N, Kawasaki Y. Clinical utility of the neutrophil elastase inhibitor sivelestat for the treatment of acute respiratory distress syndrome. *Ther Clin Risk Manag* **10**: 621-9, 2014. PMID 25120368

## CQ12. Study flow diagram

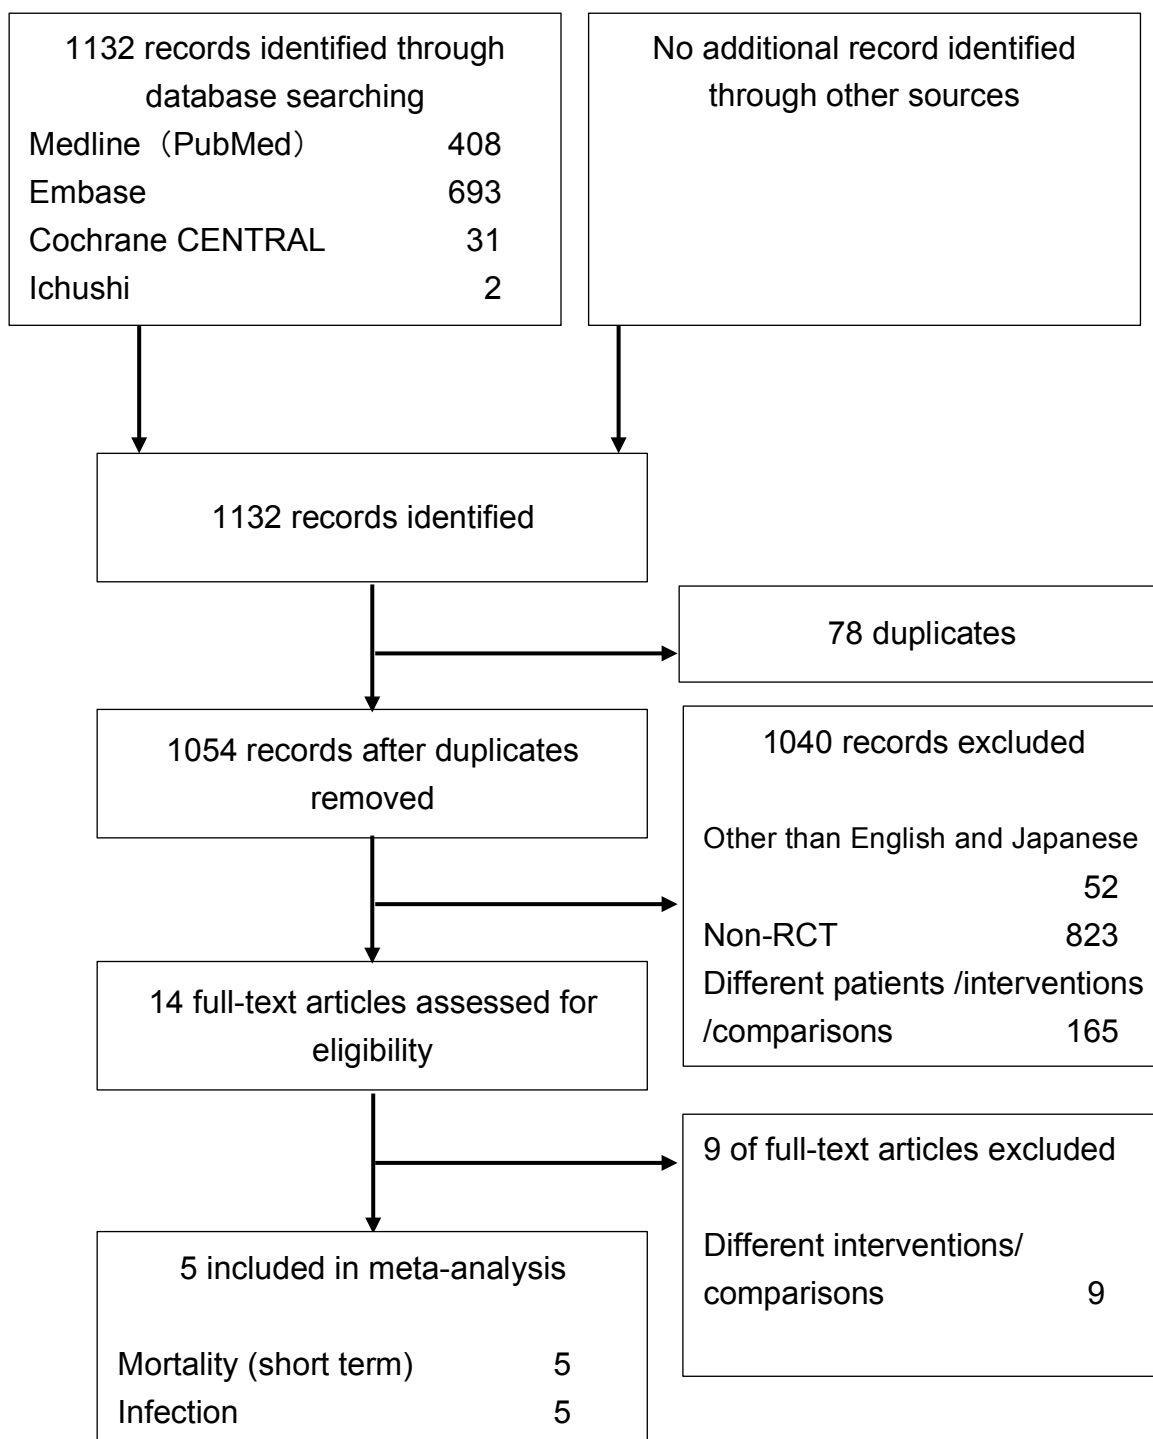



| Outcome |                            | Short term mortality                      |                                                   | risk of bias                                     |                                                  | not serious (0)                                  |                                              |                                    |                                              |
|---------|----------------------------|-------------------------------------------|---------------------------------------------------|--------------------------------------------------|--------------------------------------------------|--------------------------------------------------|----------------------------------------------|------------------------------------|----------------------------------------------|
| 番号      | 著者名 発表年<br>(Forest plot表示) | risk of bias評価                            |                                                   |                                                  |                                                  |                                                  |                                              |                                    |                                              |
|         |                            | ランダム割付順序の生成<br>random sequence generation | 割り付けの隠蔽化<br>allocation concealment                | ブラインド<br>blinding                                |                                                  | 不完全なアウトカムデータ<br>incomplete outcome data          | 選択されたアウトカムの報告<br>selective outcome reporting | その他のバイアス<br>Other sources of bias  | 研究内でのバイアスのリスク<br>Risk of bias within a study |
|         |                            |                                           |                                                   | 研究参加者と治療提供者<br>participants and personnel        | アウトカム評価者<br>outcome assessors                    |                                                  |                                              |                                    |                                              |
| 1       | Annane 2006                | Unclear risk                              | Unclear risk                                      | Low risk                                         | Low risk                                         | Low risk                                         | Low risk                                     | High risk                          | Unclear risk                                 |
| 5       | ARDS network 2006          | Low risk                                  | Unclear risk                                      | Low risk                                         | Unclear risk                                     | Low risk                                         | Low risk                                     | Unclear risk                       | Low risk                                     |
| 2       | Bernard1987                | Low risk                                  | Low risk                                          | Low risk                                         | Low risk                                         | Unclear risk                                     | Unclear risk                                 | Unclear risk                       | Unclear risk                                 |
| 3       | Meduri 1998                | Low risk                                  | Low risk                                          | Low risk                                         | Unclear risk                                     | Low risk                                         | Unclear risk                                 | Unclear risk                       | Unclear risk                                 |
| 4       | Meduri 2007                | Low risk                                  | Low risk                                          | Low risk                                         | Unclear risk                                     | High risk                                        | Low risk                                     | Unclear risk                       | Unclear risk                                 |
|         |                            | ↑ ↓ 「アブストラクトテーブル」からコピーしてください。             |                                                   |                                                  |                                                  |                                                  |                                              |                                    |                                              |
| 番号      | 著者名 発表年<br>(Forest plot表示) | risk of biasコメント                          |                                                   |                                                  |                                                  |                                                  |                                              |                                    |                                              |
| 1       | Annane 2006                | 元の論文は、二重盲検化プラセボ対照試験だが、本論文はそれの事後解析である。     | 元の論文は、二重盲検化プラセボ対照試験だが、本論文はそれの事後解析である。             | 元の論文は、二重盲検化プラセボ対照試験だが、本論文はそれの事後解析であるがバイアスリスクはない。 | 元の論文は、二重盲検化プラセボ対照試験だが、本論文はそれの事後解析であるがバイアスリスクはない。 | 事後解析なので欠損なし。                                     | 結果は図表で示されている。                                | 事後解析であること。                         | ほとんど、Unclear riskのため。                        |
|         | ARDS network 2006          | 置換ブロック法を用いて盲検化                            | 記載なし                                              | 要約に、「二重盲検を行った」との記載                               | 記載なし                                             | 図により患者数の経過が記載されている。                              | 主要結果から代替結果まで表にまとめられている。                      | 筋弛緩薬の使用                            | 全体として、Low riskが多い。                           |
| 2       | Bernard1987                | コンピューターによるランダム化                           | 順番に番号をつけたバイアルに、ステロイドまたはプラセボを入れた。バイアルの中身は盲検化されていた。 | 研究グループのメンバー、患者本人・家族も盲検化されていた。                    | 研究グループのメンバー、患者本人・家族も盲検化されていた。                    | ITT (intention-to-treat) 解析の記載はないが、実際にはITT解析された。 | サンプルサイズの記載がない。途中で試験を中止した疑い。                  | 資金提供した製薬企業と使用薬剤の関連が不明。             | ほぼ、Low riskであるため。                            |
| 3       | Meduri 1998                | 乱数を発生させるジェネレーターを使用。                       | 二重盲検化プラセボ対照試験の記載                                  | 二重盲検化プラセボ対照試験の記載                                 | 記載なし。                                            | 図により患者数の経過が表示されている。                              | サンプルサイズの記載がない。                               | 連続検定により中断した記載。早期中断の疑い。             | クロスオーバー（プラセボステロイド）症例（4例、いずれも死亡）が多い。早期終了している。 |
| 4       | Meduri 2007                | 乱数作成装置で作成した乱数表を使用（ネット上の補遺に記載）             | 封書を利用した盲検化（ネット上の補遺に記載）                            | 「二重盲検化プラセボ対照試験」の記載                               | 明瞭な記載なし（多分、解析時に情報を見ることができている。）                   | プロトコル違反、脱落者数が母数の10%を超える                          | 表で報告されている。                                   | 「結果」が、主要アウトカム（死亡）ではなく、代替のアウトカムである。 | ほぼ、Low riskのため。                              |

| Outcome |                            | The incidence of infection                |                                                   | risk of bias                                   |                                                | not serious (0)                                   |                                              |                                   |                                              |
|---------|----------------------------|-------------------------------------------|---------------------------------------------------|------------------------------------------------|------------------------------------------------|---------------------------------------------------|----------------------------------------------|-----------------------------------|----------------------------------------------|
| 番号      | 著者名 発表年<br>(Forest plot表示) | risk of bias評価                            |                                                   |                                                |                                                |                                                   |                                              |                                   |                                              |
|         |                            | ランダム割付順序の生成<br>random sequence generation | 割り付けの隠蔽化<br>allocation concealment                | ブラインド<br>blinding                              |                                                | 不完全なアウトカムデータ<br>incomplete outcome data           | 選択されたアウトカムの報告<br>selective outcome reporting | その他のバイアス<br>Other sources of bias | 研究内でのバイアスのリスク<br>Risk of bias within a study |
|         |                            |                                           |                                                   | 研究参加者と治療提供者<br>participants and personnel      | アウトカム評価者<br>outcome assessors                  |                                                   |                                              |                                   |                                              |
| 1       | Annane 2006                | Unclear risk                              | Unclear risk                                      | Low risk                                       | Low risk                                       | Low risk                                          | Low risk                                     | High risk                         | Unclear risk                                 |
| 5       | ARDS network 2006          | Low risk                                  | Unclear risk                                      | Low risk                                       | Low risk                                       | Low risk                                          | Low risk                                     | Low risk                          | Unclear risk                                 |
| 2       | Bernard1987                | Low risk                                  | Low risk                                          | Low risk                                       | Low risk                                       | Unclear risk                                      | Unclear risk                                 | Unclear risk                      | Unclear risk                                 |
| 3       | Meduri 1998                | Low risk                                  | Low risk                                          | Low risk                                       | High risk                                      | Low risk                                          | Unclear risk                                 | Unclear risk                      | Unclear risk                                 |
| 4       | Meduri 2007                | Low risk                                  | Low risk                                          | Low risk                                       | Unclear risk                                   | High risk                                         | Low risk                                     | Low risk                          | Unclear risk                                 |
|         |                            |                                           |                                                   |                                                |                                                |                                                   |                                              |                                   |                                              |
| 番号      | 著者名 発表年<br>(Forest plot表示) | risk of biasコメント                          |                                                   |                                                |                                                |                                                   |                                              |                                   |                                              |
| 1       | Annane 2006                | 元の論文は、二重盲検化プラセボ対照試験だが、本論文はその後解析である。       | 元の論文は、二重盲検化プラセボ対照試験だが、本論文はその後解析である。               | 元の論文は、二重盲検化プラセボ対照試験だが、本論文はその後解析であるがバイアスリスクはない。 | 元の論文は、二重盲検化プラセボ対照試験だが、本論文はその後解析であるがバイアスリスクはない。 | 事後解析なのでけっそんなし。                                    | 結果は図表で示されている。                                | 事後解析であること。                        | ほとんど、Unclear riskのため。                        |
|         | ARDS network 2006          | 置換ブロック法を用いて盲検化                            | 記載なし                                              | 要約に、「二重盲検を行った」との記載                             | 記載なし                                           | 図により患者数の経過が記載されている。                               | 主要結果から代替結果まで表にまとめられている。                      | 筋弛緩薬の使用                           | 全体として、Low riskが多い。                           |
| 2       | Bernard1987                | コンピューターによるランダム化                           | 順番に番号をつけたバイアルに、ステロイドまたはプラセボを入れた。バイアルの中身は盲検化されていた。 | 研究グループのメンバー、患者本人・家族も盲検化されていた。                  | 研究グループのメンバー、患者本人・家族も盲検化されていた。                  | ITT(intention-to-treat)解析の記載はないが、実際にはITT解析されたている。 | サンプルサイズの記載がない。途中で試験を中止した疑い。                  | 資金提供した製薬企業と使用薬剤の関連が不明。            | ほぼ、Low riskであるため。                            |
| 3       | Meduri 1998                | 乱数を発生させるジェネレーターを使用。                       | 二重盲検化プラセボ対照試験の記載                                  | 二重盲検化プラセボ対照試験の記載                               | 記載なし。影響する可能性あり。                                | 図により患者数の経過が表示されている。                               | サンプルサイズの記載がない。                               | 連続検定により中断した記載。早期中断の疑い。            | クロスオーバー(プラセボステロイド)症例(4例、いずれも死亡)が多い。早期終了している。 |
| 4       | Meduri 2007                | 乱数作成装置で作成した乱数表を使用(ネット上の補遺に記載)             | 封書を利用した盲検化(ネット上の補遺に記載)                            | 「二重盲検化プラセボ対照試験」の記載                             | 明瞭な記載なし(多分、解析時に情報を見ることができている。)                 | プロトコル違反、脱落者数が母数の10%を超える                           | 表で報告されている。                                   | 表中に報告されている。                       | ほぼ、Low riskのため。                              |

| Outcome |                            | VFD                                       | risk of bias                       |                                           | not serious (0)                |                                         |                                              |                                   |                                               |
|---------|----------------------------|-------------------------------------------|------------------------------------|-------------------------------------------|--------------------------------|-----------------------------------------|----------------------------------------------|-----------------------------------|-----------------------------------------------|
| 番号      | 著者名 発表年<br>(Forest plot表示) | risk of bias評価                            |                                    |                                           |                                |                                         |                                              |                                   |                                               |
|         |                            | ランダム割付順序の生成<br>random sequence generation | 割り付けの隠蔽化<br>allocation concealment | ブラインド<br>blinding                         |                                | 不完全なアウトカムデータ<br>incomplete outcome data | 選択されたアウトカムの報告<br>selective outcome reporting | その他のバイアス<br>Other sources of bias | 研究内でのバイアスのリスク<br>Risk of bias within a study  |
|         |                            |                                           |                                    | 研究参加者と治療提供者<br>participants and personnel | アウトカム評価者<br>outcome assessors  |                                         |                                              |                                   |                                               |
| 1       | ARDS network 2006          | Low risk                                  | Unclear risk                       | Low risk                                  | Unclear risk                   | Low risk                                | Low risk                                     | Unclear risk                      | Low risk                                      |
| 5       | Meduri 1998                | Low risk                                  | Low risk                           | Low risk                                  | Unclear risk                   | Low risk                                | Unclear risk                                 | Unclear risk                      | Unclear risk                                  |
| 2       | Meduri 2007                | Low risk                                  | Low risk                           | Low risk                                  | Unclear risk                   | High risk                               | Low risk                                     | Low risk                          | Unclear risk                                  |
| 9       |                            |                                           |                                    |                                           |                                |                                         |                                              |                                   |                                               |
| 番号      | 著者名 発表年<br>(Forest plot表示) | risk of biasコメント                          |                                    |                                           |                                |                                         |                                              |                                   |                                               |
| 1       | ARDS network 2006          | 置換ブロック法を用いて盲検化                            | 記載なし                               | 要約に、「二重盲検を行った」との記載                        | 記載なし                           | 図により患者数の経過が記載されている。                     | 主要結果から代替結果まで表にまとめられている。                      | 筋弛緩薬の使用                           | 全体として、Low riskが多い。                            |
| 2       | Meduri 1998                | 乱数を発生させるジェネレーターを使用。                       | 二重盲検化プラセボ対照試験の記載                   | 二重盲検化プラセボ対照試験の記載                          | 記載なし。                          | 図により患者数の経過が表示されている。                     | サンプルサイズの記載がない。                               | 連続検定により中断した記載。早期中断の疑い。            | クロスオーバー(プラセボ+ステロイド)症例(4例、いずれも死亡)が多い。早期終了している。 |
| 3       | Meduri 2007                | 乱数作成装置で作成した乱数表を使用(ネット上の補遺に記載)             | 封書を利用した盲検化(ネット上の補遺に記載)             | 「二重盲検化プラセボ対照試験」の記載                        | 明瞭な記載なし(多分、解析時に情報を見ることができている。) | プロトコール違反、脱落者数が母数の10%を超える                | 表で報告されている。                                   | 報告済み                              | ほぼ、Low riskのため。                               |

## Short term mortality

|                   | Random sequence generation (selection bias) | Allocation concealment (selection bias) | Blinding of participants and personnel (performance bias) | Blinding of outcome assessment (detection bias) | Incomplete outcome data (attrition bias) | Selective reporting (reporting bias) | Other bias |
|-------------------|---------------------------------------------|-----------------------------------------|-----------------------------------------------------------|-------------------------------------------------|------------------------------------------|--------------------------------------|------------|
| Annane 2006       | ?                                           | ?                                       | +                                                         | +                                               | +                                        | +                                    | -          |
| ARDS network 2006 | +                                           | ?                                       | +                                                         | +                                               | +                                        | +                                    | +          |
| Bernard 1987      | +                                           | +                                       | +                                                         | +                                               | ?                                        | ?                                    | +          |
| Meduri 1998       | +                                           | +                                       | +                                                         | ?                                               | +                                        | ?                                    | ?          |
| Meduri 2007       | +                                           | +                                       | +                                                         | ?                                               | -                                        | +                                    | +          |

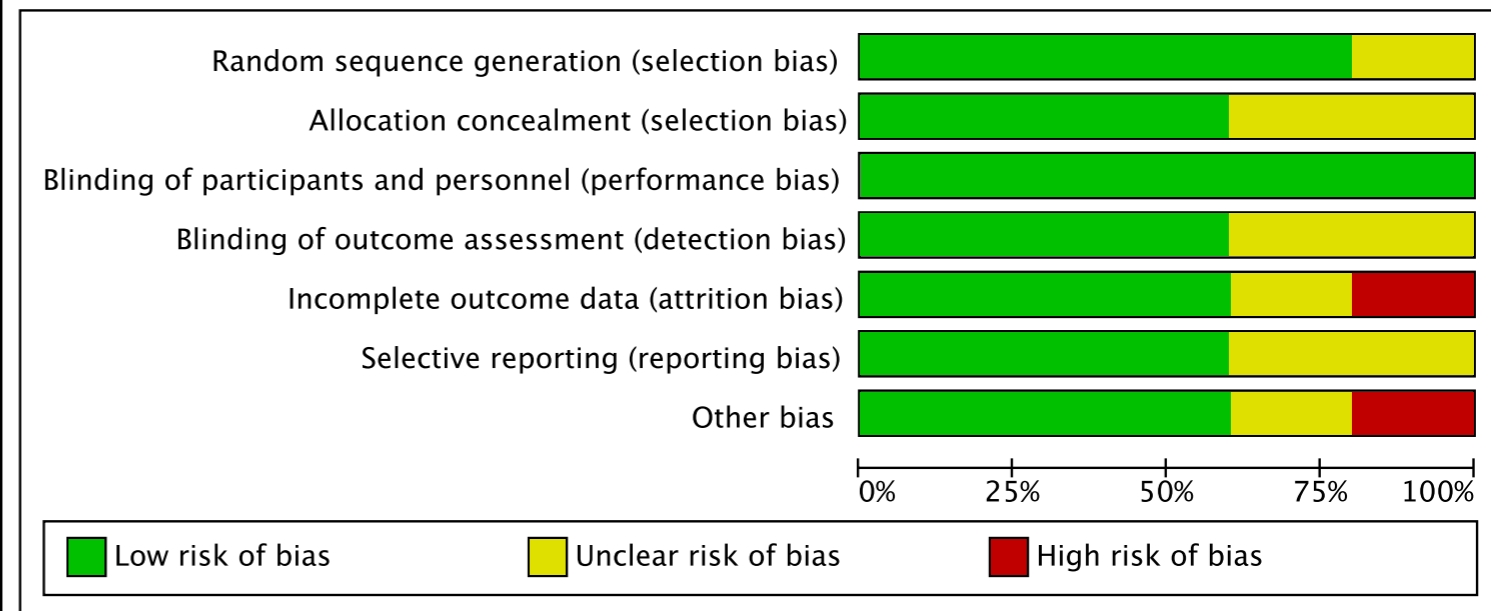

# Infection

|                   | Random sequence generation (selection bias) | Allocation concealment (selection bias) | Blinding of participants and personnel (performance bias) | Blinding of outcome assessment (detection bias) | Incomplete outcome data (attrition bias) | Selective reporting (reporting bias) | Other bias |
|-------------------|---------------------------------------------|-----------------------------------------|-----------------------------------------------------------|-------------------------------------------------|------------------------------------------|--------------------------------------|------------|
| Annane 2006       | ?                                           | ?                                       | +                                                         | +                                               | +                                        | +                                    | -          |
| ARDS network 2006 | +                                           | ?                                       | +                                                         | +                                               | +                                        | +                                    | +          |
| Bernard 1987      | +                                           | +                                       | +                                                         | +                                               | ?                                        | ?                                    | +          |
| Meduri 1998       | +                                           | +                                       | +                                                         | -                                               | +                                        | ?                                    | ?          |
| Meduri 2007       | +                                           | +                                       | +                                                         | ?                                               | -                                        | +                                    | +          |

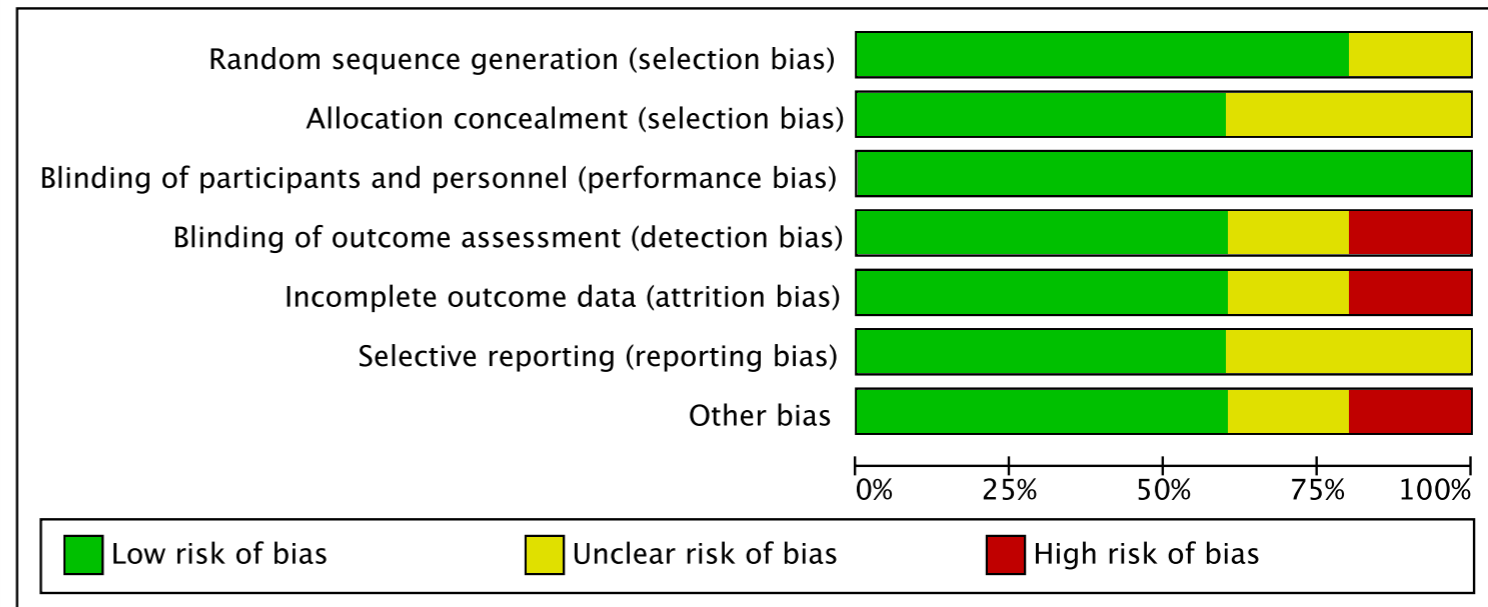

# VFD

|                   | Random sequence generation (selection bias) | Allocation concealment (selection bias) | Blinding of participants and personnel (performance bias) | Blinding of outcome assessment (detection bias) | Incomplete outcome data (attrition bias) | Selective reporting (reporting bias) | Other bias |
|-------------------|---------------------------------------------|-----------------------------------------|-----------------------------------------------------------|-------------------------------------------------|------------------------------------------|--------------------------------------|------------|
| ARDS network 2006 | +                                           | ?                                       | +                                                         | ?                                               | +                                        | +                                    | ?          |
| Meduri 1998       | +                                           | +                                       | +                                                         | ?                                               | +                                        | ?                                    | ?          |
| Meduri 2007       | +                                           | +                                       | +                                                         | ?                                               | -                                        | +                                    | +          |

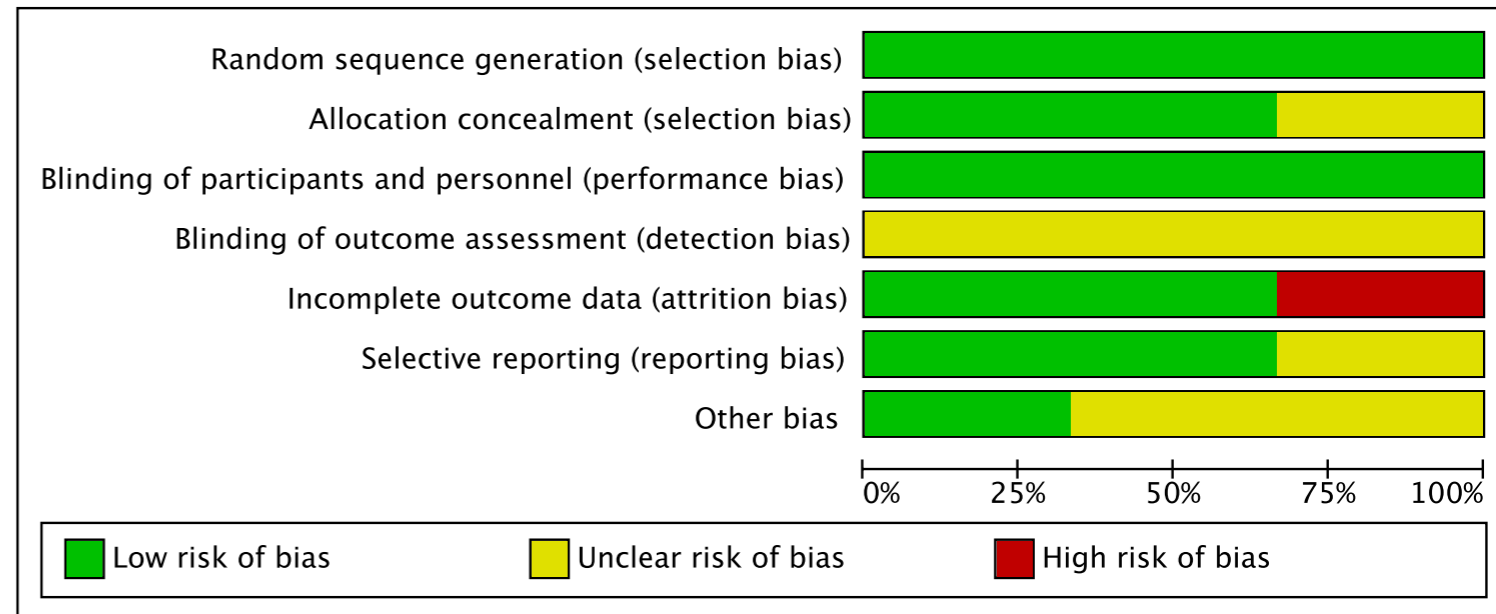

### Short term mortality

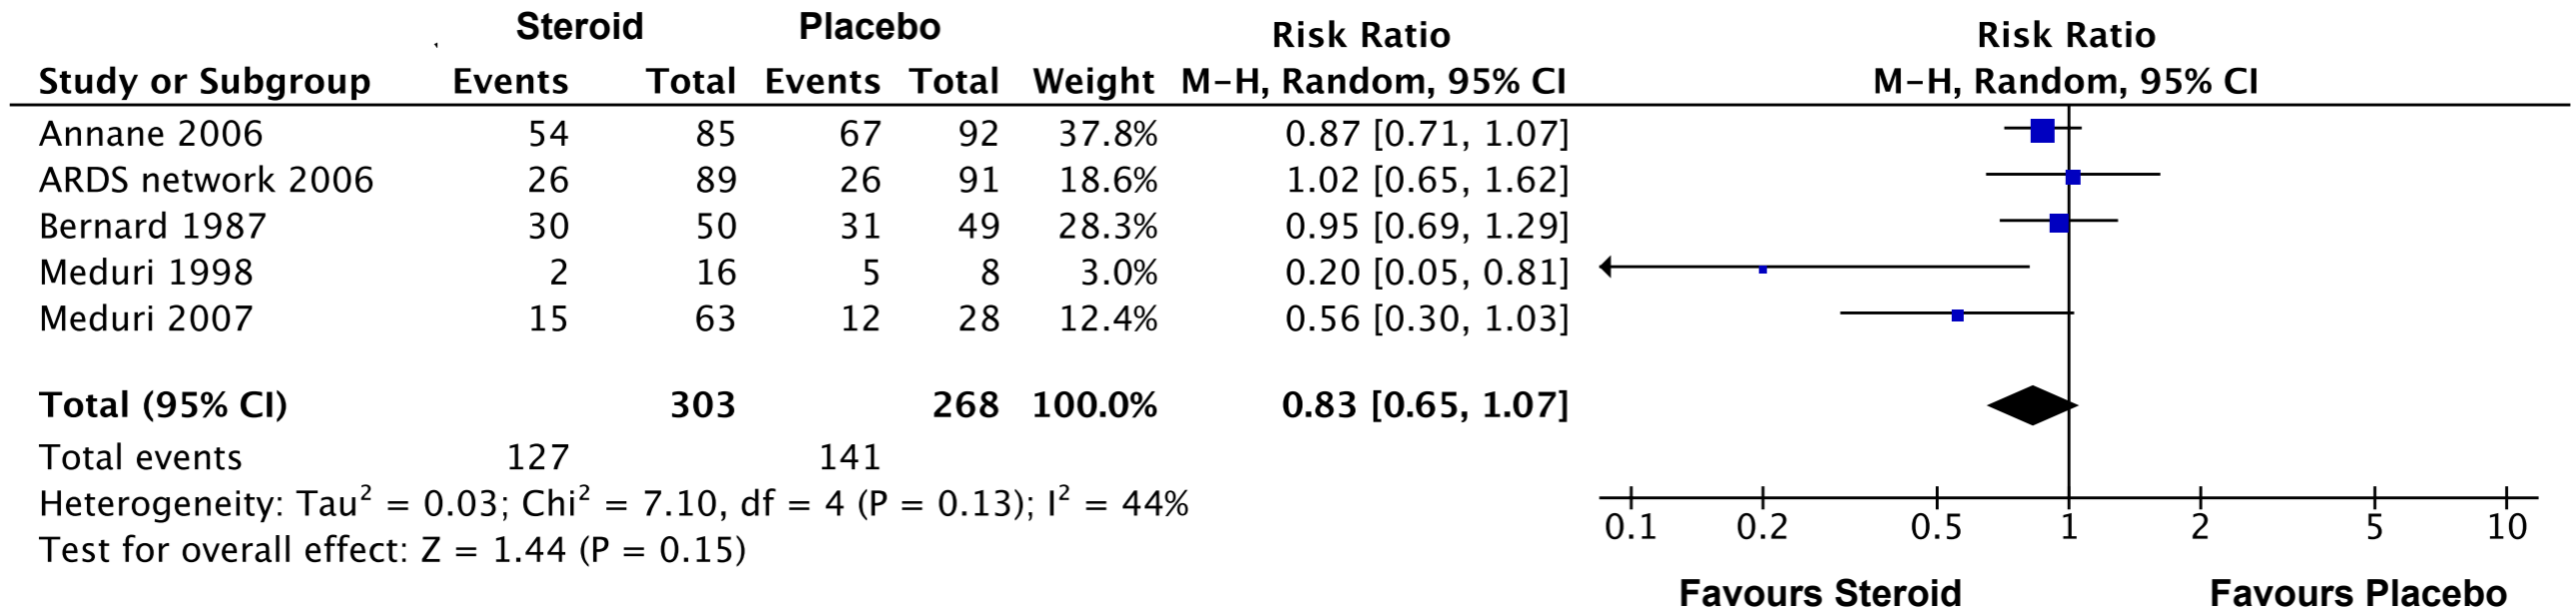

### Infection

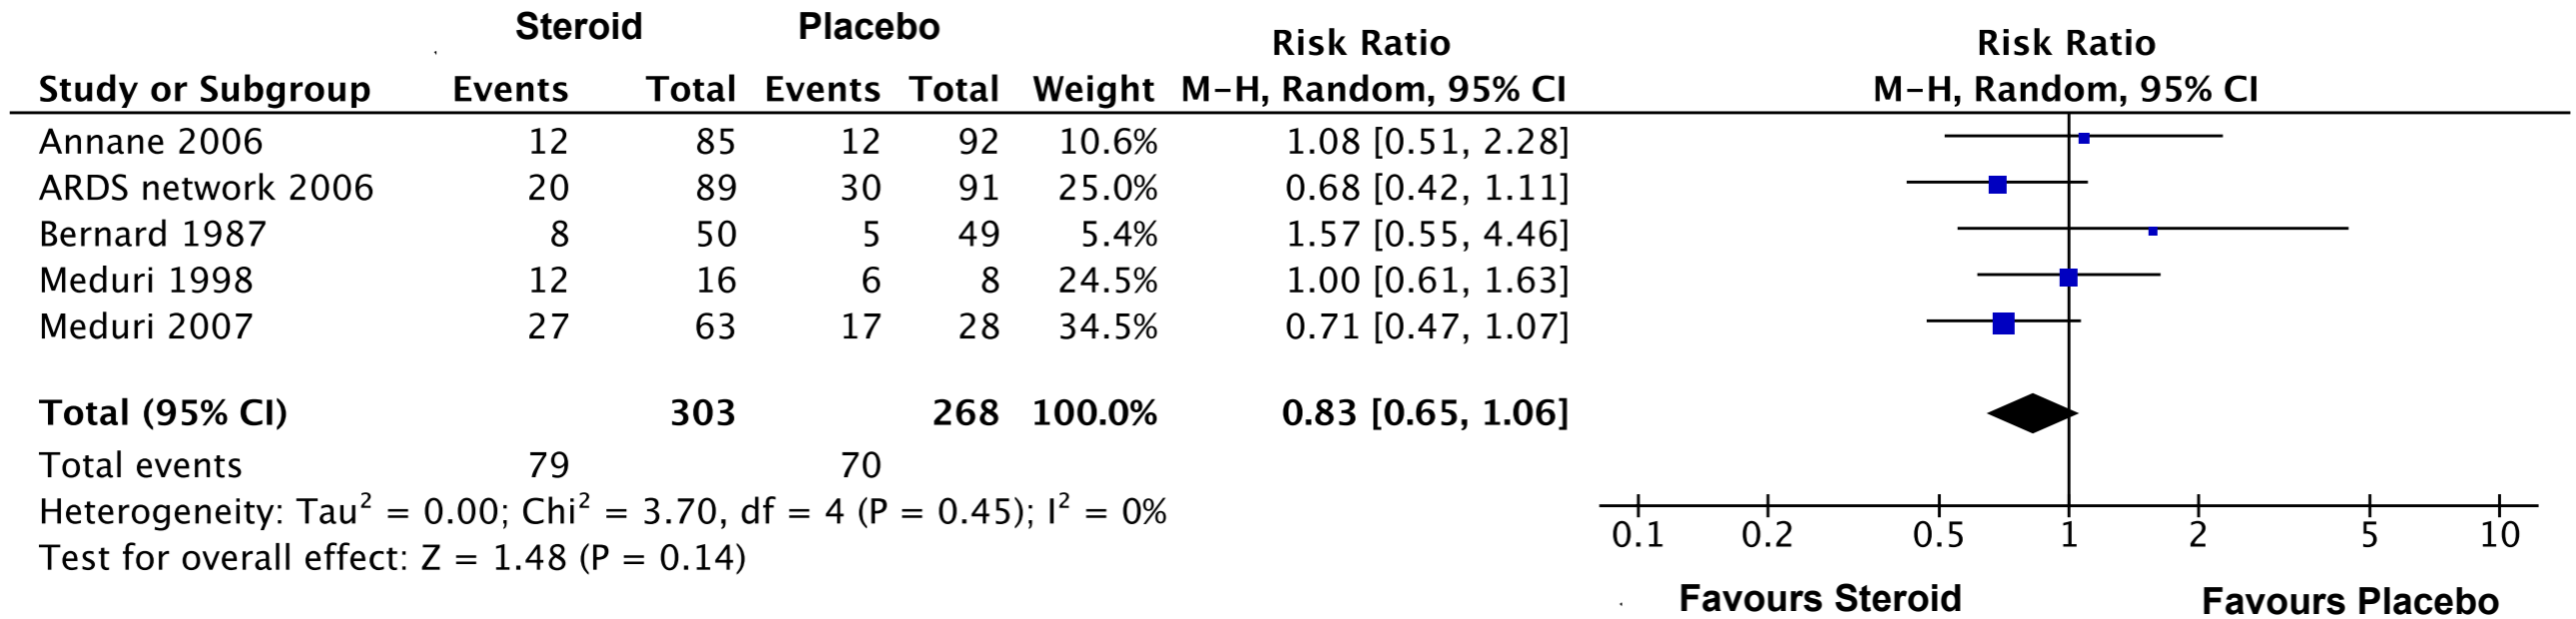

### VFD

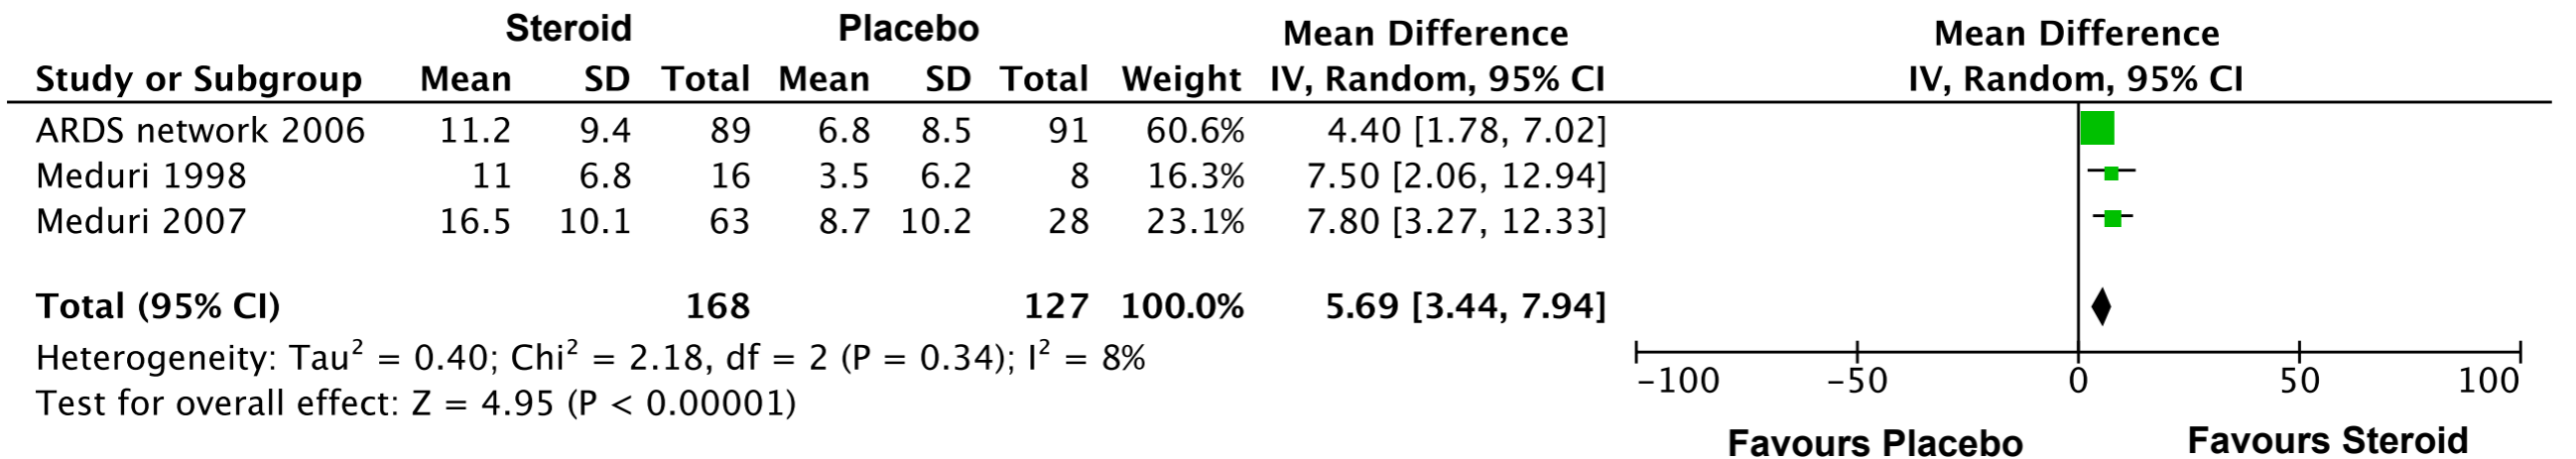

## Summary of findings:

## ARDS steroids compared to placebo for ARDS patients

Patient or population: ARDS patients

Setting:

Intervention: steroids

Comparison: placebo

| Outcomes             | Anticipated absolute effects* (95% CI) |                                               | Relative effect (95% CI)  | № of participants (studies) | Quality of the evidence (GRADE) | Comments |
|----------------------|----------------------------------------|-----------------------------------------------|---------------------------|-----------------------------|---------------------------------|----------|
|                      | Risk with placebo                      | Risk with ARDS steroids                       |                           |                             |                                 |          |
| Short-term mortality | Study population                       |                                               | RR 0.83<br>(0.65 to 1.07) | 571<br>(5 RCTs)             | ⊕⊕⊕⊕<br>HIGH                    |          |
|                      | 526 per 1000                           | <b>437 per 1000</b><br>(342 to 563)           |                           |                             |                                 |          |
|                      | Low                                    |                                               |                           |                             |                                 |          |
|                      | 238 per 1000                           | <b>198 per 1000</b><br>(155 to 255)           |                           |                             |                                 |          |
|                      | High                                   |                                               |                           |                             |                                 |          |
|                      | 635 per 1000                           | <b>527 per 1000</b><br>(413 to 679)           |                           |                             |                                 |          |
| Infection            | Study population                       |                                               | RR 0.83<br>(0.65 to 1.06) | 571<br>(5 RCTs)             | ⊕⊕⊕⊕<br>HIGH                    |          |
|                      | 261 per 1000                           | <b>217 per 1000</b><br>(170 to 277)           |                           |                             |                                 |          |
|                      | Low                                    |                                               |                           |                             |                                 |          |
|                      | 141 per 1000                           | <b>117 per 1000</b><br>(92 to 149)            |                           |                             |                                 |          |
|                      | High                                   |                                               |                           |                             |                                 |          |
|                      | 426 per 1000                           | <b>354 per 1000</b><br>(277 to 452)           |                           |                             |                                 |          |
| VFD                  | Mean 12.3 days                         | 5.67 days more MD<br>(3.49 more to 7.68 more) | -                         | 295<br>(3 RCTs)             | ⊕⊕⊕⊕<br>HIGH                    |          |

\*The risk in the intervention group (and its 95% confidence interval) is based on the assumed risk in the comparison group and the relative effect of the intervention (and its 95% CI).

CI: Confidence interval; RR: Risk ratio; MD: Mean difference

## GRADE Working Group grades of evidence

**High quality:** We are very confident that the true effect lies close to that of the estimate of the effect

**Moderate quality:** We are moderately confident in the effect estimate: The true effect is likely to be close to the estimate of the effect, but there is a possibility that it is substantially different

**Low quality:** Our confidence in the effect estimate is limited: The true effect may be substantially different from the estimate of the effect

**Very low quality:** We have very little confidence in the effect estimate: The true effect is likely to be substantially different from the estimate of effect



**CQ12:****Question:** Should steroids be used in adult patients with ARDS?

| Quality assessment     |                   |              |               |              |             |                      | № of patients   |                 | Effect                           |                                                    | Quality      | Importance |
|------------------------|-------------------|--------------|---------------|--------------|-------------|----------------------|-----------------|-----------------|----------------------------------|----------------------------------------------------|--------------|------------|
| № of studies           | Study design      | Risk of bias | Inconsistency | Indirectness | Imprecision | Other considerations | Steroid         | Placebo         | Relative (95% CI)                | Absolute (95% CI)                                  |              |            |
| Mortality (short-term) |                   |              |               |              |             |                      |                 |                 |                                  |                                                    |              |            |
| 5                      | Randomized trials | Not serious  | Not serious   | Not serious  | Not serious | None                 | 127/303 (41.9%) | 141/268 (52.6%) | <b>RR 0.83</b><br>(0.65 to 1.07) | 89 fewer per 1000<br>(from 37 more to 1844 fewer)  | ⊕⊕⊕⊕<br>HIGH | CRITICAL   |
|                        |                   |              |               |              |             |                      |                 | 23.8%           |                                  | 40 fewer per 1000<br>(from 17 more to 83 fewer)    |              |            |
|                        |                   |              |               |              |             |                      |                 | 63.5%           |                                  | 108 fewer per 1000<br>(from 44 more to 222 fewer)  |              |            |
| Incidence of infection |                   |              |               |              |             |                      |                 |                 |                                  |                                                    |              |            |
| 5                      | Randomized trials | Not serious  | Not serious   | Not serious  | Not serious | None                 | 79/303 (26.1%)  | 70/268 (26.1%)  | <b>RR 0.83</b><br>(0.65 to 1.06) | 50 fewer per 1000<br>(from 38 more to 117 fewer)   | ⊕⊕⊕⊕<br>HIGH | CRITICAL   |
|                        |                   |              |               |              |             |                      |                 | 14.1%           |                                  | 27 fewer per 1000<br>from 20 more to 62 fewer)     |              |            |
|                        |                   |              |               |              |             |                      |                 | 42.6%           |                                  | 52 fewer per 1000<br>(from 40 more to 123 fewer)   |              |            |
| VFD                    |                   |              |               |              |             |                      |                 |                 |                                  |                                                    |              |            |
| 3                      | Randomized trials | Not serious  | Not serious   | Not serious  | Not serious | None                 | 127             | 168             | -                                | MD 5.59 days more<br>(from 3.49 more to 7.68 more) | ⊕⊕⊕⊕<br>HIGH | CRITICAL   |

CI: Confidence interval, RR: Risk ratio, MD: Mean difference

**Evidence-to-Decision table**

**CQ12 : Should steroids be used in adult patients with ARDS?**

POPULATION : ADULT PATIENTS WITH ARDS

INTERVENTION : ADMINISTRATION OF STEROIDS

| CRITERIA                                                                                                                                                                                                                                                                                                                                                                    | CRITERIA                                                                                                                                                                                                                                                                                                                                                                                                                                                                                                                     | CRITERIA                                                                                                                                                                                                                                                                                                                                                                                                                                                                                                                                                                                                                                                                                                                                                                                                                                                                                                                                                                                                                                                                                                                                                                      | ADDITIONAL CONSIDERATIONS                 |                                            |                                   |                                              |                               |                         |                            |                         |                                           |                               |            |                         |                                          |            |                         |                                            |                            |            |                         |                                          |                               |            |                        |                                         |            |                         |                                           |  |
|-----------------------------------------------------------------------------------------------------------------------------------------------------------------------------------------------------------------------------------------------------------------------------------------------------------------------------------------------------------------------------|------------------------------------------------------------------------------------------------------------------------------------------------------------------------------------------------------------------------------------------------------------------------------------------------------------------------------------------------------------------------------------------------------------------------------------------------------------------------------------------------------------------------------|-------------------------------------------------------------------------------------------------------------------------------------------------------------------------------------------------------------------------------------------------------------------------------------------------------------------------------------------------------------------------------------------------------------------------------------------------------------------------------------------------------------------------------------------------------------------------------------------------------------------------------------------------------------------------------------------------------------------------------------------------------------------------------------------------------------------------------------------------------------------------------------------------------------------------------------------------------------------------------------------------------------------------------------------------------------------------------------------------------------------------------------------------------------------------------|-------------------------------------------|--------------------------------------------|-----------------------------------|----------------------------------------------|-------------------------------|-------------------------|----------------------------|-------------------------|-------------------------------------------|-------------------------------|------------|-------------------------|------------------------------------------|------------|-------------------------|--------------------------------------------|----------------------------|------------|-------------------------|------------------------------------------|-------------------------------|------------|------------------------|-----------------------------------------|------------|-------------------------|-------------------------------------------|--|
| <b>PROBLEM</b>                                                                                                                                                                                                                                                                                                                                                              | <p><b>Is the problem a priority?</b></p> <p> <input type="radio"/> No<br/> <input type="radio"/> Probably no<br/> <input type="radio"/> Probably yes<br/> <input checked="" type="radio"/> Yes<br/>                     -----<br/> <input type="radio"/> Varies<br/> <input type="radio"/> Don't know                 </p>                                                                                                                                                                                                   | <p>ARDS is defined as non-cardiogenic pulmonary edema, which may be caused by increased permeability due to epithelial and endothelial cell damage and neutrophil infiltration<sup>1, 2</sup>. Steroids, as anti-inflammatory therapy, may improve the pathologic changes associated with ARDS and a number of studies have assessed the risks and benefits of their use<sup>3</sup>. However, steroid therapy also has the potential to be detrimental to patients, and there is concern regarding an increased risk of infection. Therefore, this issue is a high priority in the management of adult patients with ARDS.</p>                                                                                                                                                                                                                                                                                                                                                                                                                                                                                                                                               |                                           |                                            |                                   |                                              |                               |                         |                            |                         |                                           |                               |            |                         |                                          |            |                         |                                            |                            |            |                         |                                          |                               |            |                        |                                         |            |                         |                                           |  |
|                                                                                                                                                                                                                                                                                                                                                                             | <p><b>What is the overall certainty of the evidence of effects?</b></p> <p> <input type="radio"/> Very low<br/> <input type="radio"/> Low<br/> <input type="radio"/> Moderate<br/> <input checked="" type="radio"/> High<br/>                     -----<br/> <input type="radio"/> No included studies                 </p>                                                                                                                                                                                                  | <p><b>The relative importance or values of the main outcomes of interest:</b></p> <table border="1" style="width: 100%;"> <thead> <tr> <th>Outcome</th> <th>Relative importance</th> <th>Certainty of the evidence (GRADE)</th> </tr> </thead> <tbody> <tr> <td>Short term mortality <small>(Note 1)</small></td> <td>CRITICAL</td> <td>⊕⊕⊕⊕<br/>HIGH</td> </tr> <tr> <td>The incidence of infection</td> <td>CRITICAL</td> <td>⊕⊕⊕⊕<br/>HIGH</td> </tr> <tr> <td>VFD <small>(Note 2)</small></td> <td>CRITICAL</td> <td>⊕⊕⊕⊕<br/>HIGH</td> </tr> </tbody> </table>                                                                                                                                                                                                                                                                                                                                                                                                                                                                                                                                                                                                           | Outcome                                   | Relative importance                        | Certainty of the evidence (GRADE) | Short term mortality <small>(Note 1)</small> | CRITICAL                      | ⊕⊕⊕⊕<br>HIGH            | The incidence of infection | CRITICAL                | ⊕⊕⊕⊕<br>HIGH                              | VFD <small>(Note 2)</small>   | CRITICAL   | ⊕⊕⊕⊕<br>HIGH            |                                          |            |                         |                                            |                            |            |                         |                                          |                               |            |                        |                                         |            |                         |                                           |  |
| Outcome                                                                                                                                                                                                                                                                                                                                                                     | Relative importance                                                                                                                                                                                                                                                                                                                                                                                                                                                                                                          | Certainty of the evidence (GRADE)                                                                                                                                                                                                                                                                                                                                                                                                                                                                                                                                                                                                                                                                                                                                                                                                                                                                                                                                                                                                                                                                                                                                             |                                           |                                            |                                   |                                              |                               |                         |                            |                         |                                           |                               |            |                         |                                          |            |                         |                                            |                            |            |                         |                                          |                               |            |                        |                                         |            |                         |                                           |  |
| Short term mortality <small>(Note 1)</small>                                                                                                                                                                                                                                                                                                                                | CRITICAL                                                                                                                                                                                                                                                                                                                                                                                                                                                                                                                     | ⊕⊕⊕⊕<br>HIGH                                                                                                                                                                                                                                                                                                                                                                                                                                                                                                                                                                                                                                                                                                                                                                                                                                                                                                                                                                                                                                                                                                                                                                  |                                           |                                            |                                   |                                              |                               |                         |                            |                         |                                           |                               |            |                         |                                          |            |                         |                                            |                            |            |                         |                                          |                               |            |                        |                                         |            |                         |                                           |  |
| The incidence of infection                                                                                                                                                                                                                                                                                                                                                  | CRITICAL                                                                                                                                                                                                                                                                                                                                                                                                                                                                                                                     | ⊕⊕⊕⊕<br>HIGH                                                                                                                                                                                                                                                                                                                                                                                                                                                                                                                                                                                                                                                                                                                                                                                                                                                                                                                                                                                                                                                                                                                                                                  |                                           |                                            |                                   |                                              |                               |                         |                            |                         |                                           |                               |            |                         |                                          |            |                         |                                            |                            |            |                         |                                          |                               |            |                        |                                         |            |                         |                                           |  |
| VFD <small>(Note 2)</small>                                                                                                                                                                                                                                                                                                                                                 | CRITICAL                                                                                                                                                                                                                                                                                                                                                                                                                                                                                                                     | ⊕⊕⊕⊕<br>HIGH                                                                                                                                                                                                                                                                                                                                                                                                                                                                                                                                                                                                                                                                                                                                                                                                                                                                                                                                                                                                                                                                                                                                                                  |                                           |                                            |                                   |                                              |                               |                         |                            |                         |                                           |                               |            |                         |                                          |            |                         |                                            |                            |            |                         |                                          |                               |            |                        |                                         |            |                         |                                           |  |
| <b>DESIRABLE AND UNDESIRABLE EFFECTS</b>                                                                                                                                                                                                                                                                                                                                    | <p><b>Is there important uncertainty about or variability in how much people value the main outcomes?</b></p> <p> <input type="radio"/> Important uncertainty or variability<br/> <input type="radio"/> Possibly important uncertainty or variability<br/> <input type="radio"/> Possibly no important uncertainty or variability<br/> <input checked="" type="radio"/> No important uncertainty or variability<br/>                     -----<br/> <input type="radio"/> No known undesirable outcomes                 </p> | <p><b>Summary of findings:</b></p> <table border="1" style="width: 100%;"> <thead> <tr> <th>Outcome</th> <th>Placebo</th> <th>Steroid</th> <th>Absolute effect (95% CI)</th> <th>Relative effect (RR) (95% CI)</th> </tr> </thead> <tbody> <tr> <td rowspan="3">Mortality (short-term )</td> <td>526 / 1000</td> <td>437 / 1000 (342 to 563)</td> <td>89 fewer/1000 (from 37 more to 184 fewer)</td> <td rowspan="3"><b>RR 0.83</b> (0.65 to 1.07)</td> </tr> <tr> <td>238 / 1000</td> <td>198 / 1000 (155 to 255)</td> <td>40 fewer/1000 (from 17 more to 83 fewer)</td> </tr> <tr> <td>635 / 1000</td> <td>527 / 1000 (413 to 679)</td> <td>108 fewer/1000 (from 44 more to 222 fewer)</td> </tr> <tr> <td rowspan="3">The incidence of infection</td> <td>261 / 1000</td> <td>217 / 1000 (170 to 277)</td> <td>44 fewer/1000 (from 16 more To 91 fewer)</td> <td rowspan="3"><b>RR 0.83</b> (0.65 to 1.06)</td> </tr> <tr> <td>141 / 1000</td> <td>117 / 1000 (92 to 149)</td> <td>24 fewer/1000 (from 8 more to 49 fewer)</td> </tr> <tr> <td>426 / 1000</td> <td>354 / 1000 (277 to 452)</td> <td>72 fewer/1000 (from 26 more to 149 fewer)</td> </tr> </tbody> </table> | Outcome                                   | Placebo                                    | Steroid                           | Absolute effect (95% CI)                     | Relative effect (RR) (95% CI) | Mortality (short-term ) | 526 / 1000                 | 437 / 1000 (342 to 563) | 89 fewer/1000 (from 37 more to 184 fewer) | <b>RR 0.83</b> (0.65 to 1.07) | 238 / 1000 | 198 / 1000 (155 to 255) | 40 fewer/1000 (from 17 more to 83 fewer) | 635 / 1000 | 527 / 1000 (413 to 679) | 108 fewer/1000 (from 44 more to 222 fewer) | The incidence of infection | 261 / 1000 | 217 / 1000 (170 to 277) | 44 fewer/1000 (from 16 more To 91 fewer) | <b>RR 0.83</b> (0.65 to 1.06) | 141 / 1000 | 117 / 1000 (92 to 149) | 24 fewer/1000 (from 8 more to 49 fewer) | 426 / 1000 | 354 / 1000 (277 to 452) | 72 fewer/1000 (from 26 more to 149 fewer) |  |
|                                                                                                                                                                                                                                                                                                                                                                             | Outcome                                                                                                                                                                                                                                                                                                                                                                                                                                                                                                                      | Placebo                                                                                                                                                                                                                                                                                                                                                                                                                                                                                                                                                                                                                                                                                                                                                                                                                                                                                                                                                                                                                                                                                                                                                                       | Steroid                                   | Absolute effect (95% CI)                   | Relative effect (RR) (95% CI)     |                                              |                               |                         |                            |                         |                                           |                               |            |                         |                                          |            |                         |                                            |                            |            |                         |                                          |                               |            |                        |                                         |            |                         |                                           |  |
|                                                                                                                                                                                                                                                                                                                                                                             | Mortality (short-term )                                                                                                                                                                                                                                                                                                                                                                                                                                                                                                      | 526 / 1000                                                                                                                                                                                                                                                                                                                                                                                                                                                                                                                                                                                                                                                                                                                                                                                                                                                                                                                                                                                                                                                                                                                                                                    | 437 / 1000 (342 to 563)                   | 89 fewer/1000 (from 37 more to 184 fewer)  | <b>RR 0.83</b> (0.65 to 1.07)     |                                              |                               |                         |                            |                         |                                           |                               |            |                         |                                          |            |                         |                                            |                            |            |                         |                                          |                               |            |                        |                                         |            |                         |                                           |  |
|                                                                                                                                                                                                                                                                                                                                                                             |                                                                                                                                                                                                                                                                                                                                                                                                                                                                                                                              | 238 / 1000                                                                                                                                                                                                                                                                                                                                                                                                                                                                                                                                                                                                                                                                                                                                                                                                                                                                                                                                                                                                                                                                                                                                                                    | 198 / 1000 (155 to 255)                   | 40 fewer/1000 (from 17 more to 83 fewer)   |                                   |                                              |                               |                         |                            |                         |                                           |                               |            |                         |                                          |            |                         |                                            |                            |            |                         |                                          |                               |            |                        |                                         |            |                         |                                           |  |
|                                                                                                                                                                                                                                                                                                                                                                             |                                                                                                                                                                                                                                                                                                                                                                                                                                                                                                                              | 635 / 1000                                                                                                                                                                                                                                                                                                                                                                                                                                                                                                                                                                                                                                                                                                                                                                                                                                                                                                                                                                                                                                                                                                                                                                    | 527 / 1000 (413 to 679)                   | 108 fewer/1000 (from 44 more to 222 fewer) |                                   |                                              |                               |                         |                            |                         |                                           |                               |            |                         |                                          |            |                         |                                            |                            |            |                         |                                          |                               |            |                        |                                         |            |                         |                                           |  |
| The incidence of infection                                                                                                                                                                                                                                                                                                                                                  | 261 / 1000                                                                                                                                                                                                                                                                                                                                                                                                                                                                                                                   | 217 / 1000 (170 to 277)                                                                                                                                                                                                                                                                                                                                                                                                                                                                                                                                                                                                                                                                                                                                                                                                                                                                                                                                                                                                                                                                                                                                                       | 44 fewer/1000 (from 16 more To 91 fewer)  | <b>RR 0.83</b> (0.65 to 1.06)              |                                   |                                              |                               |                         |                            |                         |                                           |                               |            |                         |                                          |            |                         |                                            |                            |            |                         |                                          |                               |            |                        |                                         |            |                         |                                           |  |
|                                                                                                                                                                                                                                                                                                                                                                             | 141 / 1000                                                                                                                                                                                                                                                                                                                                                                                                                                                                                                                   | 117 / 1000 (92 to 149)                                                                                                                                                                                                                                                                                                                                                                                                                                                                                                                                                                                                                                                                                                                                                                                                                                                                                                                                                                                                                                                                                                                                                        | 24 fewer/1000 (from 8 more to 49 fewer)   |                                            |                                   |                                              |                               |                         |                            |                         |                                           |                               |            |                         |                                          |            |                         |                                            |                            |            |                         |                                          |                               |            |                        |                                         |            |                         |                                           |  |
|                                                                                                                                                                                                                                                                                                                                                                             | 426 / 1000                                                                                                                                                                                                                                                                                                                                                                                                                                                                                                                   | 354 / 1000 (277 to 452)                                                                                                                                                                                                                                                                                                                                                                                                                                                                                                                                                                                                                                                                                                                                                                                                                                                                                                                                                                                                                                                                                                                                                       | 72 fewer/1000 (from 26 more to 149 fewer) |                                            |                                   |                                              |                               |                         |                            |                         |                                           |                               |            |                         |                                          |            |                         |                                            |                            |            |                         |                                          |                               |            |                        |                                         |            |                         |                                           |  |
| <p><b>How substantial are the desirable anticipated effects?</b></p> <p> <input type="radio"/> Trivial<br/> <input checked="" type="radio"/> Small<br/> <input type="radio"/> Moderate<br/> <input type="radio"/> Large<br/>                     -----<br/> <input type="radio"/> Varies<br/> <input type="radio"/> Don't know                 </p>                         |                                                                                                                                                                                                                                                                                                                                                                                                                                                                                                                              |                                                                                                                                                                                                                                                                                                                                                                                                                                                                                                                                                                                                                                                                                                                                                                                                                                                                                                                                                                                                                                                                                                                                                                               |                                           |                                            |                                   |                                              |                               |                         |                            |                         |                                           |                               |            |                         |                                          |            |                         |                                            |                            |            |                         |                                          |                               |            |                        |                                         |            |                         |                                           |  |
| <p><b>How substantial are the undesirable anticipated effects?</b></p> <p> <input type="radio"/> Large<br/> <input type="radio"/> Moderate<br/> <input type="radio"/> Small<br/> <input checked="" type="radio"/> Trivial<br/>                     -----<br/> <input type="radio"/> Varies<br/> <input type="radio"/> Don't know                 </p>                       |                                                                                                                                                                                                                                                                                                                                                                                                                                                                                                                              |                                                                                                                                                                                                                                                                                                                                                                                                                                                                                                                                                                                                                                                                                                                                                                                                                                                                                                                                                                                                                                                                                                                                                                               |                                           |                                            |                                   |                                              |                               |                         |                            |                         |                                           |                               |            |                         |                                          |            |                         |                                            |                            |            |                         |                                          |                               |            |                        |                                         |            |                         |                                           |  |
| <p><b>Does the balance between desirable and undesirable effects favor the intervention or</b></p> <p> <input type="radio"/> Favors the comparison<br/> <input type="radio"/> Probably favors the comparison<br/> <input type="radio"/> Does not favor either the intervention or the comparison<br/> <input checked="" type="radio"/> Probably favors                 </p> |                                                                                                                                                                                                                                                                                                                                                                                                                                                                                                                              |                                                                                                                                                                                                                                                                                                                                                                                                                                                                                                                                                                                                                                                                                                                                                                                                                                                                                                                                                                                                                                                                                                                                                                               |                                           |                                            |                                   |                                              |                               |                         |                            |                         |                                           |                               |            |                         |                                          |            |                         |                                            |                            |            |                         |                                          |                               |            |                        |                                         |            |                         |                                           |  |

|                           |                                                                                                  |                                                                                                                                                                                                                                                                                                                                                                                                                                        |                                                                                                                                                                                                                                                                                                                                                                                                                                                                                                                                                                                                                                                                                                                                                                                                                                                                                                                                       |     |                  |                   |                                            |   |  |
|---------------------------|--------------------------------------------------------------------------------------------------|----------------------------------------------------------------------------------------------------------------------------------------------------------------------------------------------------------------------------------------------------------------------------------------------------------------------------------------------------------------------------------------------------------------------------------------|---------------------------------------------------------------------------------------------------------------------------------------------------------------------------------------------------------------------------------------------------------------------------------------------------------------------------------------------------------------------------------------------------------------------------------------------------------------------------------------------------------------------------------------------------------------------------------------------------------------------------------------------------------------------------------------------------------------------------------------------------------------------------------------------------------------------------------------------------------------------------------------------------------------------------------------|-----|------------------|-------------------|--------------------------------------------|---|--|
|                           | <p>the comparison?</p>                                                                           | <p>the intervention<br/> <input type="radio"/> Favors the intervention<br/>                 -----<br/> <input type="radio"/> Varies<br/> <input type="radio"/> Don't know</p>                                                                                                                                                                                                                                                          | <table border="1" style="width: 100%; text-align: center;"> <tr> <td style="width: 15%;">VFD</td> <td style="width: 15%;">Average 6.7 days</td> <td style="width: 15%;">Average 12.3 days</td> <td style="width: 20%;">MD 5.67 more (from 3.49 more to 7.68 more)</td> <td style="width: 35%; text-align: center;">-</td> </tr> </table> <p><b>Summary:</b> Steroid administration did not significantly decrease the mortality in comparison with placebo. However, it significantly increased number of ventilator free days (VFD). In addition, steroid therapy did not significantly increase the incidence of infection.</p> <p>Randomized controlled trials to assess the number of VFD were evaluated the effect of methylprednisolone 1-2mg/kg/day. An RCT conducted by Bernard et al showed that steroid therapy (methylprednisolone 120mg/kg/day) had a trend to increase the incidence of infection (odds ratio=1.57).</p> | VFD | Average 6.7 days | Average 12.3 days | MD 5.67 more (from 3.49 more to 7.68 more) | - |  |
| VFD                       | Average 6.7 days                                                                                 | Average 12.3 days                                                                                                                                                                                                                                                                                                                                                                                                                      | MD 5.67 more (from 3.49 more to 7.68 more)                                                                                                                                                                                                                                                                                                                                                                                                                                                                                                                                                                                                                                                                                                                                                                                                                                                                                            | -   |                  |                   |                                            |   |  |
| <p>RESOURCES REQUIRED</p> | <p>How large are the resource requirements (costs)?</p>                                          | <p><input type="radio"/> Large costs<br/> <input type="radio"/> Moderate costs<br/> <input type="radio"/> Negligible costs and savings<br/> <input checked="" type="radio"/> Moderate savings<br/> <input type="radio"/> Large savings<br/>                 -----<br/> <input type="radio"/> Varies<br/> <input type="radio"/> Don't know</p>                                                                                          | <p>Steroid therapy is not expensive. If one assumes four weeks of treatment, the cost is expected to be 12,000 -30,000 JPY. Steroids should be available in a majority of hospitals.</p>                                                                                                                                                                                                                                                                                                                                                                                                                                                                                                                                                                                                                                                                                                                                              |     |                  |                   |                                            |   |  |
|                           | <p>Does the cost-effectiveness of the intervention favor the intervention or the comparison?</p> | <p><input type="radio"/> Favors the comparison<br/> <input type="radio"/> Probably favors the comparison<br/> <input type="radio"/> Does not favor either the intervention or the comparison<br/> <input checked="" type="radio"/> Probably favors the intervention<br/> <input type="radio"/> Favors the intervention<br/>                 -----<br/> <input type="radio"/> Varies<br/> <input type="radio"/> No included studies</p> | <p>Steroid therapy is not expensive. If one considers the effect on VFD, the cost is less than the benefit.</p>                                                                                                                                                                                                                                                                                                                                                                                                                                                                                                                                                                                                                                                                                                                                                                                                                       |     |                  |                   |                                            |   |  |
| <p>EQUITY</p>             | <p>What would be the impact on health equity?</p>                                                | <p><input type="radio"/> Reduced<br/> <input type="radio"/> Probably reduced<br/> <input type="radio"/> Probably no impact<br/> <input type="radio"/> Probably increased<br/> <input checked="" type="radio"/> Increased<br/>                 -----<br/> <input type="radio"/> Varies<br/> <input type="radio"/> Don't know</p>                                                                                                        | <p>Special medical facilities or equipment are not required for this treatment.</p>                                                                                                                                                                                                                                                                                                                                                                                                                                                                                                                                                                                                                                                                                                                                                                                                                                                   |     |                  |                   |                                            |   |  |
| <p>ACCEPTABILITY</p>      | <p>Is the intervention acceptable to key stakeholders?</p>                                       | <p><input type="radio"/> No<br/> <input type="radio"/> Probably no<br/> <input checked="" type="radio"/> Probably yes<br/> <input type="radio"/> Yes<br/>                 -----<br/> <input type="radio"/> Varies<br/> <input type="radio"/> Don't know</p>                                                                                                                                                                            |                                                                                                                                                                                                                                                                                                                                                                                                                                                                                                                                                                                                                                                                                                                                                                                                                                                                                                                                       |     |                  |                   |                                            |   |  |
| <p>FEASIBILITY</p>        | <p>Is the intervention feasible implement?</p>                                                   | <p><input type="radio"/> No<br/> <input type="radio"/> Probably no<br/> <input type="radio"/> Probably yes<br/> <input checked="" type="radio"/> Yes<br/>                 -----<br/> <input type="radio"/> Varies<br/> <input type="radio"/> Don't know</p>                                                                                                                                                                            | <p>Special medical facilities or equipment are not required for this procedure..</p>                                                                                                                                                                                                                                                                                                                                                                                                                                                                                                                                                                                                                                                                                                                                                                                                                                                  |     |                  |                   |                                            |   |  |

Note 1) short term mortality defined as within 90days and treated as main outcome in each study.

Note 2) VFD means the number of days free from mechanical ventilation in the initial 28 days. If the patient expired within 28 days, VFD was counted as zero.

## Recommendation

## CQ12 : Should steroids be used in adult patients with ARDS?

| Balance of consequences | Undesirable consequences clearly outweigh desirable consequences in most settings | Undesirable consequences probably outweigh desirable consequences in most settings | The balance between desirable and undesirable consequences is closely balanced or uncertain | Desirable consequences probably outweigh undesirable consequences in most settings | Desirable consequences clearly outweigh undesirable consequences in most settings |
|-------------------------|-----------------------------------------------------------------------------------|------------------------------------------------------------------------------------|---------------------------------------------------------------------------------------------|------------------------------------------------------------------------------------|-----------------------------------------------------------------------------------|
| Judgement               | ○                                                                                 | ○                                                                                  | ○                                                                                           | ●                                                                                  | ○                                                                                 |

| Type of recommendation | Strong recommendation against the intervention | Conditional recommendation against the intervention | Conditional recommendation for either the intervention or the comparison | Conditional recommendation for the intervention |
|------------------------|------------------------------------------------|-----------------------------------------------------|--------------------------------------------------------------------------|-------------------------------------------------|
| Judgement              | ○                                              | ○                                                   | ●                                                                        | ○                                               |

|                |                                                                                                                                                                                                                            |
|----------------|----------------------------------------------------------------------------------------------------------------------------------------------------------------------------------------------------------------------------|
| Recommendation | <b>We suggest the administration of steroids (equivalent to methylprednisolone 1-2mg/kg/ day) to adult patients with ARDS. (GRADE 2A , strength of recommendation “ weak recommendation” / Quality of evidence “high”)</b> |
|----------------|----------------------------------------------------------------------------------------------------------------------------------------------------------------------------------------------------------------------------|

|               |                                                                                                                                                                                                                                                                                                                                                                                                                                                                                                                                                                                                                                                                                                                                                                                                                                                                                                                                                                                                                                                                                                                                                                                                                                                                                                                                                                                                                                                                                                                                                                                                                                                                                                                                                                                                                                                                                                                                                                                                                                                                                                                                                                                                                                                                                                                                                                                                                                                                                                                                                                                                                                                                                                                                                                                                                                                                                                                                                                                                                                                                                                                                                                                                                                                                                                                                                                                                                                                                                                                                                                                                                                                                                                                                                                                                                                                                                                                                                                                                                                                                                                                                                                                                                                                                                                                                                  |
|---------------|--------------------------------------------------------------------------------------------------------------------------------------------------------------------------------------------------------------------------------------------------------------------------------------------------------------------------------------------------------------------------------------------------------------------------------------------------------------------------------------------------------------------------------------------------------------------------------------------------------------------------------------------------------------------------------------------------------------------------------------------------------------------------------------------------------------------------------------------------------------------------------------------------------------------------------------------------------------------------------------------------------------------------------------------------------------------------------------------------------------------------------------------------------------------------------------------------------------------------------------------------------------------------------------------------------------------------------------------------------------------------------------------------------------------------------------------------------------------------------------------------------------------------------------------------------------------------------------------------------------------------------------------------------------------------------------------------------------------------------------------------------------------------------------------------------------------------------------------------------------------------------------------------------------------------------------------------------------------------------------------------------------------------------------------------------------------------------------------------------------------------------------------------------------------------------------------------------------------------------------------------------------------------------------------------------------------------------------------------------------------------------------------------------------------------------------------------------------------------------------------------------------------------------------------------------------------------------------------------------------------------------------------------------------------------------------------------------------------------------------------------------------------------------------------------------------------------------------------------------------------------------------------------------------------------------------------------------------------------------------------------------------------------------------------------------------------------------------------------------------------------------------------------------------------------------------------------------------------------------------------------------------------------------------------------------------------------------------------------------------------------------------------------------------------------------------------------------------------------------------------------------------------------------------------------------------------------------------------------------------------------------------------------------------------------------------------------------------------------------------------------------------------------------------------------------------------------------------------------------------------------------------------------------------------------------------------------------------------------------------------------------------------------------------------------------------------------------------------------------------------------------------------------------------------------------------------------------------------------------------------------------------------------------------------------------------------------------------------------|
| Justification | <p><b>Question:</b> Should steroids be used in adult patients with ARDS?</p> <p><b>Patients:</b> Adult patients with ARDS</p> <p><b>Interventions:</b> administration of steroids</p> <p><b>Comparison:</b> Placebo</p> <p><b>Outcomes:</b> Short-term mortality<sup>(Note 1)</sup>, the incidence of infection, the number of ventilator free days (VFD)<sup>(Note 2)</sup></p> <p><b>Summary of the evidence:</b> There are a number of randomized controlled trials of steroid therapy in patients with ARDS, including the effect of low to middle dose steroids as such methylprednisolone 1-2mg/kg/day or hydrocortisone 200mg/day, and high doses such as methylprednisolone 120mg/kg/day. Steroid administration did not significantly decrease the mortality compared to placebo. However, it significantly increased the number of ventilator free days (VFD). In addition, steroid therapy did not significantly increase the incidence of infection. All randomized controlled trials to assess the VFD evaluated the effect of methylprednisolone 1-2mg/kg/day. In an RCT conducted by Bernard et al, it was shown that steroid therapy (methylprednisolone 120mg/kg/day) had a trend to increase the incidence of infection (odds ratio=1.57)</p> <p><b>Quality of the evidence:</b> We collected RCTs to propose a recommendation on this issue. For each outcome including mortality, the risk of infection and VFD, there was a low risk of bias regarding non-consistency, non-immediateness, and non-precision. There are few studies, and the publication bias is unclear. Therefore, the overall quality of evidence across outcomes is considered to be "high".</p> <p><b>Judgement of benefit and harm, resources and cost:</b> Steroid therapy is feasible in almost all facilities in Japan. Unfortunately, it is not evaluated in each study, but it is possible to delay the diagnosis of infections by administering steroids. In addition, a risk of side effects (hyperglycemia, infection, etc.) is associated with this treatment. There is also concern regarding ICU-related muscle weakness due to steroid use. Steroid therapy is feasible in almost all facilities in Japan. There is no significant reduction of mortality with steroid therapy. Steroid therapy did not have a tendency to increase the risk of infection, and is expected to increase the number of VFD. Unfortunately, it is not evaluated in each study, but it is possible to delay the diagnosis of infections by using steroid. In addition, a risk of side effects (hyperglycemia, infection, etc.) is associated with this treatment. There is also concern regarding ICU-related muscle weakness due to steroid use.</p> <p>In the first panel meeting, both mortality and the incidence of infection were reported. The committee proposed <b>"We suggest not to use steroids in adult patients with ARDS"</b>. Since not all participants agreed with this recommendation, a vote was conducted; one person supported the suggestion to use steroids, and eleven supported the suggestion not to use steroids. One person who supported not using steroids, had a specific concern regarding a lack of effect on the number of VFD. Therefore, the results regarding VFD as the outcome was reported again. After reporting the additional results about VFD, it was proposed that <b>"We suggest the use of steroids in adult patients with ARDS"</b>. A second vote was conducted. Ten people supported the suggestion to support using steroids, and two supported the suggestion not to use steroids. The opinions raised included "importance of VFD should not be high as mortality" and "the side effect of steroids which is not evaluate in SR was not negligible."</p> <p>The authors of RCTs which reported the benefit of steroids in adults with ARDS, reported that the delayed use of steroids, such as 14 days after the onset of ARDS, would be associated with increased mortality, thus, it was suggested to use steroids during the early stage of ARDS<sup>4)</sup>.</p> <p>In a domestic survey conducted by a Japanese respiratory society in 2010, it was reported that many Japanese doctors formerly gave 500-1,000 mg/day of methylprednisolone to patients with ARDS. However, there is no RCT</p> |
|---------------|--------------------------------------------------------------------------------------------------------------------------------------------------------------------------------------------------------------------------------------------------------------------------------------------------------------------------------------------------------------------------------------------------------------------------------------------------------------------------------------------------------------------------------------------------------------------------------------------------------------------------------------------------------------------------------------------------------------------------------------------------------------------------------------------------------------------------------------------------------------------------------------------------------------------------------------------------------------------------------------------------------------------------------------------------------------------------------------------------------------------------------------------------------------------------------------------------------------------------------------------------------------------------------------------------------------------------------------------------------------------------------------------------------------------------------------------------------------------------------------------------------------------------------------------------------------------------------------------------------------------------------------------------------------------------------------------------------------------------------------------------------------------------------------------------------------------------------------------------------------------------------------------------------------------------------------------------------------------------------------------------------------------------------------------------------------------------------------------------------------------------------------------------------------------------------------------------------------------------------------------------------------------------------------------------------------------------------------------------------------------------------------------------------------------------------------------------------------------------------------------------------------------------------------------------------------------------------------------------------------------------------------------------------------------------------------------------------------------------------------------------------------------------------------------------------------------------------------------------------------------------------------------------------------------------------------------------------------------------------------------------------------------------------------------------------------------------------------------------------------------------------------------------------------------------------------------------------------------------------------------------------------------------------------------------------------------------------------------------------------------------------------------------------------------------------------------------------------------------------------------------------------------------------------------------------------------------------------------------------------------------------------------------------------------------------------------------------------------------------------------------------------------------------------------------------------------------------------------------------------------------------------------------------------------------------------------------------------------------------------------------------------------------------------------------------------------------------------------------------------------------------------------------------------------------------------------------------------------------------------------------------------------------------------------------------------------------------------------------|

|                                                 | <p>which examines the risk or benefit of this therapy, and thus it could not be assessed. Accordingly, future studies are required to assess the impact of the dose or timing of steroid therapy in this cohort.</p> <p>Result of two votes by the panel<br/>Since there was no unanimous consensus, votes were conducted.</p> <table border="1"> <thead> <tr> <th>Strength of recommendation</th> <th>Strong</th> <th>Weak</th> <th>Weak</th> <th>Strong</th> </tr> <tr> <th>Recommendation</th> <th>Recommend to use steroid</th> <th>Suggest to use steroid</th> <th>Suggest not to use steroid</th> <th>Recommend not to use steroid</th> </tr> </thead> <tbody> <tr> <td>First vote<br/>Without information of VFD</td> <td>0</td> <td>1</td> <td>11</td> <td>0</td> </tr> <tr> <td>First vote<br/>With information of VFD</td> <td>0</td> <td>10</td> <td>2</td> <td>0</td> </tr> </tbody> </table> <p>In the second vote after reporting information regarding VFD, 10 people (83%) supported the recommendation to "suggest the use of steroids". The panel finally concluded to recommend it. However, the panel also showed concerns such as "importance of VFD should not be high as mortality" and "the side effect of steroid which is not evaluate in SR was not negligible."</p> <p><b>Recommendations:</b> We suggest the administration of steroids (equivalent to methylprednisolone 1-2mg/kg/day) to adult patients with ARDS. (GRADE 2A, strength of recommendation " weak recommendation" / Quality of evidence "high")</p> <p><b>Additional considerations:</b> None</p> | Strength of recommendation | Strong                     | Weak                         | Weak | Strong | Recommendation | Recommend to use steroid | Suggest to use steroid | Suggest not to use steroid | Recommend not to use steroid | First vote<br>Without information of VFD | 0 | 1 | 11 | 0 | First vote<br>With information of VFD | 0 | 10 | 2 | 0 |
|-------------------------------------------------|------------------------------------------------------------------------------------------------------------------------------------------------------------------------------------------------------------------------------------------------------------------------------------------------------------------------------------------------------------------------------------------------------------------------------------------------------------------------------------------------------------------------------------------------------------------------------------------------------------------------------------------------------------------------------------------------------------------------------------------------------------------------------------------------------------------------------------------------------------------------------------------------------------------------------------------------------------------------------------------------------------------------------------------------------------------------------------------------------------------------------------------------------------------------------------------------------------------------------------------------------------------------------------------------------------------------------------------------------------------------------------------------------------------------------------------------------------------------------------------------------------------------------------------------------------------------------------------------|----------------------------|----------------------------|------------------------------|------|--------|----------------|--------------------------|------------------------|----------------------------|------------------------------|------------------------------------------|---|---|----|---|---------------------------------------|---|----|---|---|
| Strength of recommendation                      | Strong                                                                                                                                                                                                                                                                                                                                                                                                                                                                                                                                                                                                                                                                                                                                                                                                                                                                                                                                                                                                                                                                                                                                                                                                                                                                                                                                                                                                                                                                                                                                                                                         | Weak                       | Weak                       | Strong                       |      |        |                |                          |                        |                            |                              |                                          |   |   |    |   |                                       |   |    |   |   |
| Recommendation                                  | Recommend to use steroid                                                                                                                                                                                                                                                                                                                                                                                                                                                                                                                                                                                                                                                                                                                                                                                                                                                                                                                                                                                                                                                                                                                                                                                                                                                                                                                                                                                                                                                                                                                                                                       | Suggest to use steroid     | Suggest not to use steroid | Recommend not to use steroid |      |        |                |                          |                        |                            |                              |                                          |   |   |    |   |                                       |   |    |   |   |
| First vote<br>Without information of VFD        | 0                                                                                                                                                                                                                                                                                                                                                                                                                                                                                                                                                                                                                                                                                                                                                                                                                                                                                                                                                                                                                                                                                                                                                                                                                                                                                                                                                                                                                                                                                                                                                                                              | 1                          | 11                         | 0                            |      |        |                |                          |                        |                            |                              |                                          |   |   |    |   |                                       |   |    |   |   |
| First vote<br>With information of VFD           | 0                                                                                                                                                                                                                                                                                                                                                                                                                                                                                                                                                                                                                                                                                                                                                                                                                                                                                                                                                                                                                                                                                                                                                                                                                                                                                                                                                                                                                                                                                                                                                                                              | 10                         | 2                          | 0                            |      |        |                |                          |                        |                            |                              |                                          |   |   |    |   |                                       |   |    |   |   |
| <b>Subgroup considerations</b>                  | None                                                                                                                                                                                                                                                                                                                                                                                                                                                                                                                                                                                                                                                                                                                                                                                                                                                                                                                                                                                                                                                                                                                                                                                                                                                                                                                                                                                                                                                                                                                                                                                           |                            |                            |                              |      |        |                |                          |                        |                            |                              |                                          |   |   |    |   |                                       |   |    |   |   |
| <b>Implementation considerations</b>            | It is possible to delay the diagnosis of infections by administering steroids. In addition, a risk of side effects (hyperglycemia, infection, etc.) is associated with this treatment. There is also concern regarding ICU-related muscle weakness due to steroid use.                                                                                                                                                                                                                                                                                                                                                                                                                                                                                                                                                                                                                                                                                                                                                                                                                                                                                                                                                                                                                                                                                                                                                                                                                                                                                                                         |                            |                            |                              |      |        |                |                          |                        |                            |                              |                                          |   |   |    |   |                                       |   |    |   |   |
| <b>Monitoring and evaluation considerations</b> | Standard monitoring is sufficient. Careful evaluation for the development of secondary infections is required.                                                                                                                                                                                                                                                                                                                                                                                                                                                                                                                                                                                                                                                                                                                                                                                                                                                                                                                                                                                                                                                                                                                                                                                                                                                                                                                                                                                                                                                                                 |                            |                            |                              |      |        |                |                          |                        |                            |                              |                                          |   |   |    |   |                                       |   |    |   |   |
| <b>Research possibilities</b>                   | It is possible that the effects of steroid therapy in adult patients with ARDS may be different according to the timing of initiating therapy, dose, duration of treatment and the manner of tapering the dose. Thus, future RCTs are necessary in consideration of these points as well.                                                                                                                                                                                                                                                                                                                                                                                                                                                                                                                                                                                                                                                                                                                                                                                                                                                                                                                                                                                                                                                                                                                                                                                                                                                                                                      |                            |                            |                              |      |        |                |                          |                        |                            |                              |                                          |   |   |    |   |                                       |   |    |   |   |

Note 1) short term mortality defined as within 90days and treated as main outcome in each study.

Note 2) VFD means the number of days free from mechanical ventilation in the initial 28 days. If the patient expired within 28 days, VFD was counted as zero.

1. Kollef MH, Schuster DP. The acute respiratory distress syndrome. *The New England journal of medicine* **332**(1): 27-37, 1995. PMID 7646623
2. Force ADT, Ranieri VM, Rubenfeld GD, et al. Acute respiratory distress syndrome: the Berlin Definition. *Jama* **307**(23): 2526-33, 2012. PMID 22797452
3. Thompson BT. Glucocorticoids and acute lung injury. *Critical care medicine* **31**(4 Suppl): S253-7, 2003. PMID 12682449
4. Meduri GU, Marik PE, Chrousos GP, et al. Steroid treatment in ARDS: a critical appraisal of the ARDS network trial and the recent literature. *Intensive care medicine* **34**(1): 61-9, 2008. PMID 18000649

### CQ13. Study flow diagram

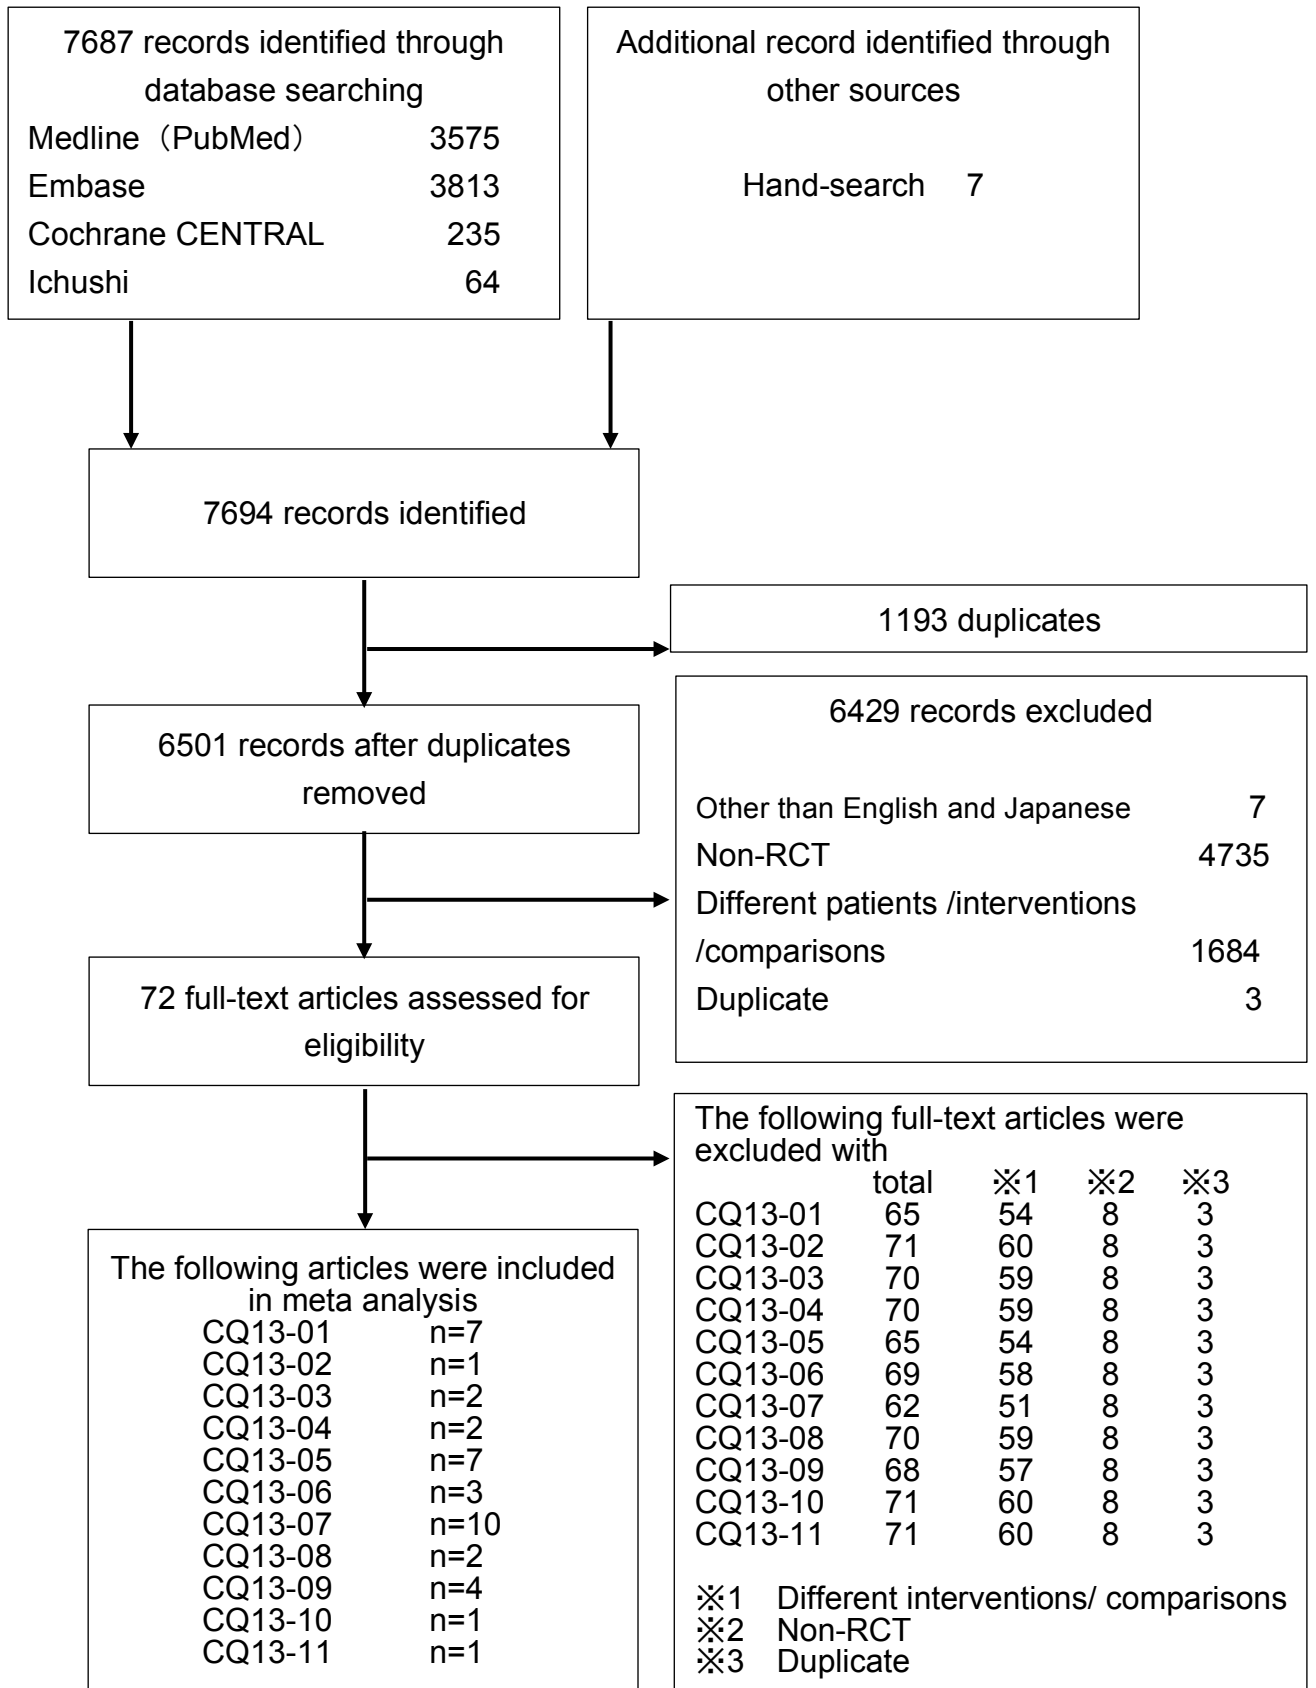

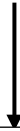

|         | Total | Short-term<br>Mortality | Severe<br>adverse effects |
|---------|-------|-------------------------|---------------------------|
| CQ13-01 | n=7   | n=7                     | n=2                       |
| CQ13-02 | n=1   | n=1                     | n=1                       |
| CQ13-03 | n=2   | n=2                     | n=2                       |
| CQ13-04 | n=2   | n=2                     | n=1                       |
| CQ13-05 | n=7   | n=7                     | n=4                       |
| CQ13-06 | n=3   | n=2                     | n=2                       |
| CQ13-07 | n=10  | n=9                     | n=6                       |
| CQ13-08 | n=2   | n=2                     | n=2                       |
| CQ13-09 | n=4   | n=4                     | n=0                       |
| CQ13-10 | n=1   | n=1                     | n=1                       |
| CQ13-11 | n=1   | n=1                     | n=0                       |

| Outcome |                            | Short term mortality                               |                                                       | risk of bias                              |                               | serious (-1)                            |                                              |                                         |                                              |
|---------|----------------------------|----------------------------------------------------|-------------------------------------------------------|-------------------------------------------|-------------------------------|-----------------------------------------|----------------------------------------------|-----------------------------------------|----------------------------------------------|
| 番号      | 著者名 発表年<br>(Forest plot表示) | risk of bias評価                                     |                                                       |                                           |                               |                                         |                                              |                                         |                                              |
|         |                            | ランダム割付順序の生成<br>random sequence generation          | 割り付けの隠蔽化<br>allocation concealment                    | ブラインド<br>blinding                         |                               | 不完全なアウトカムデータ<br>incomplete outcome data | 選択されたアウトカムの報告<br>selective outcome reporting | その他のバイアス<br>Other sources of bias       | 研究内でのバイアスのリスク<br>Risk of bias within a study |
|         |                            |                                                    |                                                       | 研究参加者と治療提供者<br>participants and personnel | アウトカム評価者<br>outcome assessors |                                         |                                              |                                         |                                              |
| 1       | Dellinger 1998             | Unclear risk                                       | Unclear risk                                          | Low risk                                  | Low risk                      | Low risk                                | Unclear risk                                 | High risk                               | Unclear risk                                 |
| 2       | Gerlach 2003               | Low risk                                           | Low risk                                              | High risk                                 | High risk                     | Low risk                                | Unclear risk                                 | Low risk                                | Unclear risk                                 |
| 3       | Mehta 2001                 | Low risk                                           | Low risk                                              | High risk                                 | High risk                     | Low risk                                | Unclear risk                                 | Unclear risk                            | Unclear risk                                 |
| 4       | Michael 1998               | Unclear risk                                       | Unclear risk                                          | High risk                                 | Low risk                      | Unclear risk                            | Low risk                                     | Low risk                                | Unclear risk                                 |
| 5       | Park 2003                  | High risk                                          | High risk                                             | High risk                                 | High risk                     | Low risk                                | Unclear risk                                 | Low risk                                | High risk                                    |
| 6       | Taylor 2004                | Low risk                                           | Low risk                                              | Low risk                                  | Low risk                      | Low risk                                | Unclear risk                                 | High risk                               | Low risk                                     |
| 7       | Troncy 1998                | Unclear risk                                       | Unclear risk                                          | High risk                                 | High risk                     | Low risk                                | Low risk                                     | Unclear risk                            | Unclear risk                                 |
|         |                            |                                                    |                                                       |                                           |                               |                                         |                                              |                                         |                                              |
| 番号      | 著者名 発表年<br>(Forest plot表示) | risk of biasコメント                                   |                                                       |                                           |                               |                                         |                                              |                                         |                                              |
| 1       | Dellinger 1998             | 記載なし                                               | 記載なし                                                  | 盲検化を保つために、各施設に非盲検の研究者をおいた                 | 盲検化を保つために、各施設に非盲検の研究者をおいた     | 約98%フォローされた                             | 事前に計画されたプロトコルが閲覧できなかった                       | 32%が介入を最後まで全うできなかった                     | LowとUnclearが同数で、Highが1項目あり、Unclearとした        |
| 2       | Gerlach 2003               | 外観からわからない抽選                                        | 外観からわからない抽選                                           | 盲検化されていない                                 | 盲検化されていない                     | 100%フォローされた                             | 事前に計画されたプロトコルが閲覧できなかった                       | 研究の中断なし                                 | High 2項目のため、Unclearとした                       |
| 3       | Mehta 2001                 | computer-generated random number sequenceによってランダム化 | computer-generated random number sequenceによって割り付けの隠蔽化 | 研究参加者、治療提供者ともブラインド化されていない                 | アウトカム評価者もブラインド化されていない         | データの欠損がない                               | 研究プロトコルが利用できない                               | 一部、企業からの資金提供がある                         | low3項目、high2項目                               |
| 4       | Michael 1998               | ランダム化の詳細が未記載                                       | 割り付けはブロック法を用いているが、ブラインド化されていないため予測できた可能性がある           | 研究参加者、治療提供者ともブラインド化されていない                 | ブラインド化されていないが、影響を受けない         | 院内死亡のみ記載                                | 研究プロトコルが利用不可能だが、問題ない                         | 他のbiasがない                               | low3項目、high1項目                               |
| 5       | Park 2003                  | 完全に無作為化にはできなかった                                    | 完全に無作為化にはできなかった                                       | 対照群は非使用群                                  | 対照群は非使用群                      | 100%フォロー                                | 事前に計画されたプロトコルが閲覧できなかった                       | その他のバイアスは指摘できなかった                       | Highが4項目ありHighとした                            |
| 6       | Taylor 2004                | 中央でランダム化                                           | 中央割り付け                                                | 研究参加者、治療提供者(医師、看護師、呼吸療法士)ともブラインド化されている    | アウトカム評価者もブラインド化されている          | データの欠損がない                               | 評価するための十分な情報がない                              | 企業からの資金提供がある、protocolが守られていない症例が計31例あった | low5項目、high1項目                               |
| 7       | Troncy 1998                | ランダム化の方法が未記載                                       | 割り付けの方法が未記載                                           | 研究参加者、治療提供者ともブラインド化されていない                 | アウトカム評価者もブラインド化されていない         | データの欠損がない                               | 研究プロトコルが利用不可能だが、本outcomeを含んでいる               | 評価するための十分な情報がない                         | low2項目、high2項目                               |



| Outcome                                   |                               | Severe adverse effects                    |                                    | risk of bias                           |                           | not serious (0)                         |                                              |                                         |                                              |
|-------------------------------------------|-------------------------------|-------------------------------------------|------------------------------------|----------------------------------------|---------------------------|-----------------------------------------|----------------------------------------------|-----------------------------------------|----------------------------------------------|
| 番号                                        | 著者名 発表年<br>(Forest plot表示)    | risk of bias評価                            |                                    |                                        |                           |                                         |                                              |                                         |                                              |
|                                           |                               | ランダム割付順序の生成<br>random sequence generation | 割り付けの隠蔽化<br>allocation concealment | ブラインド<br>blinding                      |                           | 不完全なアウトカムデータ<br>incomplete outcome data | 選択されたアウトカムの報告<br>selective outcome reporting | その他のバイアス<br>Other sources of bias       | 研究内でのバイアスのリスク<br>Risk of bias within a study |
| 研究参加者と治療提供者<br>participants and personnel | アウトカム評価者<br>outcome assessors |                                           |                                    |                                        |                           |                                         |                                              |                                         |                                              |
| 1                                         | Dellinger 1998                | Unclear risk                              | Unclear risk                       | Low risk                               | Low risk                  | Low risk                                | Unclear risk                                 | High risk                               | Unclear risk                                 |
| 6                                         | Taylor 2004                   | Low risk                                  | Low risk                           | Low risk                               | Low risk                  | Low risk                                | Unclear risk                                 | High risk                               | Low risk                                     |
|                                           |                               |                                           |                                    |                                        |                           |                                         |                                              |                                         |                                              |
| 番号                                        | 著者名 発表年<br>(Forest plot表示)    | risk of biasコメント                          |                                    |                                        |                           |                                         |                                              |                                         |                                              |
| 1                                         | Dellinger 1998                | 記載なし                                      | 記載なし                               | 盲検化を保つために、各施設に非盲検の研究者をおいた              | 盲検化を保つために、各施設に非盲検の研究者をおいた | 約98%フォローされた                             | 事前に計画されたプロトコルが閲覧できなかった                       | 32%で介入を最後まで全うできなかった                     | LowとUnclearが同数で、Highが1項目あり、Unclearとした        |
| 6                                         | Taylor 2004                   | 中央でランダム化                                  | 中央割り付け                             | 研究参加者、治療提供者(医師、看護師、呼吸療法士)ともブラインド化されている | アウトカム評価者もブラインド化されている      | データの欠損がない                               | 評価するための十分な情報がない                              | 企業からの資金提供がある、protocolが守られていない症例が計31例あった | low5項目、high1項目                               |

| Outcome                                   |                               | Short term mortality                      | risk of bias                       |                          |                      | not serious (0)                         |                                              |                                   |                                              |
|-------------------------------------------|-------------------------------|-------------------------------------------|------------------------------------|--------------------------|----------------------|-----------------------------------------|----------------------------------------------|-----------------------------------|----------------------------------------------|
| 番号                                        | 著者名 発表年<br>(Forest plot表示)    | risk of bias評価                            |                                    |                          |                      |                                         |                                              |                                   |                                              |
|                                           |                               | ランダム割付順序の生成<br>random sequence generation | 割り付けの隠蔽化<br>allocation concealment | ブラインド<br>blinding        |                      | 不完全なアウトカムデータ<br>incomplete outcome data | 選択されたアウトカムの報告<br>selective outcome reporting | その他のバイアス<br>Other sources of bias | 研究内でのバイアスのリスク<br>Risk of bias within a study |
| 研究参加者と治療提供者<br>participants and personnel | アウトカム評価者<br>outcome assessors |                                           |                                    |                          |                      |                                         |                                              |                                   |                                              |
| 1                                         | Matthay 2011                  | Low risk                                  | Low risk                           | Low risk                 | Low risk             | Low risk                                | Low risk                                     | Low risk                          | Low risk                                     |
|                                           |                               |                                           |                                    |                          |                      |                                         |                                              |                                   |                                              |
| 番号                                        | 著者名 発表年<br>(Forest plot表示)    | risk of biasコメント                          |                                    |                          |                      |                                         |                                              |                                   |                                              |
| 1                                         | Matthay 2011                  | 中央割り付けで、インターネットによるシステムでランダム化              | 中央割り付けで、インターネットによるシステムでランダム化       | 研究参加者、治療提供者ともブラインド化されている | アウトカム評価者もブラインド化されている | データの欠損がない                               | 研究プロトコルが利用でき決められたアウトカムの報告がなされている             | 他のバイアスがない                         | low7項目、high0項目                               |

| Outcome                                   |                               | Severe adverse effects                    | risk of bias                       |                          | not serious (0)      |                                         |                                              |                                   |                                              |
|-------------------------------------------|-------------------------------|-------------------------------------------|------------------------------------|--------------------------|----------------------|-----------------------------------------|----------------------------------------------|-----------------------------------|----------------------------------------------|
| 番号                                        | 著者名 発表年<br>(Forest plot表示)    | risk of bias評価                            |                                    |                          |                      |                                         |                                              |                                   |                                              |
|                                           |                               | ランダム割付順序の生成<br>random sequence generation | 割り付けの隠蔽化<br>allocation concealment | ブラインド<br>blinding        |                      | 不完全なアウトカムデータ<br>incomplete outcome data | 選択されたアウトカムの報告<br>selective outcome reporting | その他のバイアス<br>Other sources of bias | 研究内でのバイアスのリスク<br>Risk of bias within a study |
| 研究参加者と治療提供者<br>participants and personnel | アウトカム評価者<br>outcome assessors |                                           |                                    |                          |                      |                                         |                                              |                                   |                                              |
| 1                                         | Matthay 2011                  | Low risk                                  | Low risk                           | Low risk                 | Low risk             | Low risk                                | Low risk                                     | Low risk                          | Low risk                                     |
|                                           |                               |                                           |                                    |                          |                      |                                         |                                              |                                   |                                              |
| 番号                                        | 著者名 発表年<br>(Forest plot表示)    | risk of biasコメント                          |                                    |                          |                      |                                         |                                              |                                   |                                              |
| 1                                         | Matthay 2011                  | 中央割り付けで、インターネットによるシステムでランダム化              | 中央割り付けで、インターネットによるシステムでランダム化       | 研究参加者、治療提供者ともブラインド化されている | アウトカム評価者もブラインド化されている | データの欠損がない                               | 研究プロトコルが利用でき決められたアウトカムの報告がなされている             | 他のバイアスがない                         | low7項目、high0項目                               |

| Outcome |                            | Short term mortality                              | risk of bias                                                        |                                           | not serious (0)               |                                         |                                              |                                   |                                              |
|---------|----------------------------|---------------------------------------------------|---------------------------------------------------------------------|-------------------------------------------|-------------------------------|-----------------------------------------|----------------------------------------------|-----------------------------------|----------------------------------------------|
| 番号      | 著者名 発表年<br>(Forest plot表示) | risk of bias評価                                    |                                                                     |                                           |                               |                                         |                                              |                                   |                                              |
|         |                            | ランダム割付順番の生成<br>random sequence generation         | 割り付けの隠蔽化<br>allocation concealment                                  | ブラインド<br>blinding                         |                               | 不完全なアウトカムデータ<br>incomplete outcome data | 選択されたアウトカムの報告<br>selective outcome reporting | その他のバイアス<br>Other sources of bias | 研究内でのバイアスのリスク<br>Risk of bias within a study |
|         |                            |                                                   |                                                                     | 研究参加者と治療提供者<br>participants and personnel | アウトカム評価者<br>outcome assessors |                                         |                                              |                                   |                                              |
| 1       | Gao 2012                   | Low risk                                          | Low risk                                                            | Low risk                                  | Low risk                      | Low risk                                | Low risk                                     | Low risk                          | Low risk                                     |
| 2       | Perkins 2006               | Unclear risk                                      | Unclear risk                                                        | Low risk                                  | Low risk                      | Low risk                                | Unclear risk                                 | Unclear risk                      | Unclear risk                                 |
|         |                            |                                                   |                                                                     |                                           |                               |                                         |                                              |                                   |                                              |
| 番号      | 著者名 発表年<br>(Forest plot表示) | risk of biasコメント                                  |                                                                     |                                           |                               |                                         |                                              |                                   |                                              |
| 1       | Gao 2012                   | Computer-generated randomizationを使用し、適切にランダム化された。 | Central telephone か web-based randomisation service を使用し、適切に隠蔽化された。 | 割り付けを研究参加者と治療提供者は知らされていなかった。              | 割り付けを評価者は知らされていなかった。          | ほぼ100%フォローされた                           | 100%報告された                                    | 他のbiasなし(研究の中断あるも問題なし)            | 全ての項目がLow risk                               |
| 2       | Perkins 2006               | ランダム化の方法の情報が不十分                                   | 割り付けの方法が未記載                                                         | 盲検化されていた。                                 | 盲検化されていた。                     | 100%フォローされた。                            | 評価するには不十分な情報                                 | 評価するには不十分な情報                      | Unclearが多い                                   |

| Outcome                                   |                               | Severe adverse effects                            |                                                                    | risk of bias                 |                      | not serious (0)                         |                                              |                                   |                                              |
|-------------------------------------------|-------------------------------|---------------------------------------------------|--------------------------------------------------------------------|------------------------------|----------------------|-----------------------------------------|----------------------------------------------|-----------------------------------|----------------------------------------------|
| 番号                                        | 著者名 発表年<br>(Forest plot表示)    | risk of bias評価                                    |                                                                    |                              |                      |                                         |                                              |                                   |                                              |
|                                           |                               | ランダム割付順番の生成<br>random sequence generation         | 割り付けの隠蔽化<br>allocation concealment                                 | ブラインド<br>blinding            |                      | 不完全なアウトカムデータ<br>incomplete outcome data | 選択されたアウトカムの報告<br>selective outcome reporting | その他のバイアス<br>Other sources of bias | 研究内でのバイアスのリスク<br>Risk of bias within a study |
| 研究参加者と治療提供者<br>participants and personnel | アウトカム評価者<br>outcome assessors |                                                   |                                                                    |                              |                      |                                         |                                              |                                   |                                              |
| 1                                         | Gao 2012                      | Low risk                                          | Low risk                                                           | Low risk                     | Low risk             | Low risk                                | Low risk                                     | Low risk                          | Low risk                                     |
| 2                                         | Perkins 2006                  | Unclear risk                                      | Unclear risk                                                       | Low risk                     | Low risk             | Low risk                                | Unclear risk                                 | Unclear risk                      | Unclear risk                                 |
|                                           |                               |                                                   |                                                                    |                              |                      |                                         |                                              |                                   |                                              |
| 番号                                        | 著者名 発表年<br>(Forest plot表示)    | risk of biasコメント                                  |                                                                    |                              |                      |                                         |                                              |                                   |                                              |
| 1                                         | Gao 2012                      | Computer-generated randomizationを使用し、適切にランダム化された。 | Central telephone か web-based randomisation serviceを使用し、適切に隠蔽化された。 | 割り付けを研究参加者と治療提供者は知らされていなかった。 | 割り付けを評価者は知らされていなかった。 | ほぼ100%フォローされた                           | 100%報告された                                    | 他のbiasなし(研究の中断あるも問題なし)            | 全ての項目がLow risk                               |
| 2                                         | Perkins 2006                  | ランダム化の方法の情報が不十分                                   | 割り付けの方法が未記載                                                        | 盲検化されていた。                    | 盲検化されていた。            | 100%フォローされた。                            | 評価するには不十分な情報                                 | 評価するには不十分な情報                      | Unclearが多い                                   |

| Outcome |                            | Short term mortality                      | risk of bias                       |                                               |                                               | not serious (0)                         |                                              |                                        |                                              |
|---------|----------------------------|-------------------------------------------|------------------------------------|-----------------------------------------------|-----------------------------------------------|-----------------------------------------|----------------------------------------------|----------------------------------------|----------------------------------------------|
| 番号      | 著者名 発表年<br>(Forest plot表示) | risk of bias評価                            |                                    |                                               |                                               |                                         |                                              |                                        |                                              |
|         |                            | ランダム割付順番の生成<br>random sequence generation | 割り付けの隠蔽化<br>allocation concealment | ブラインド<br>blinding                             |                                               | 不完全なアウトカムデータ<br>incomplete outcome data | 選択されたアウトカムの報告<br>selective outcome reporting | その他のバイアス<br>Other sources of bias      | 研究内でのバイアスのリスク<br>Risk of bias within a study |
|         |                            |                                           |                                    | 研究参加者と治療提供者<br>participants and personnel     | アウトカム評価者<br>outcome assessors                 |                                         |                                              |                                        |                                              |
| 1       | Paine 2012                 | Low risk                                  | Low risk                           | Low risk                                      | Low risk                                      | Low risk                                | Low risk                                     | High risk                              | Low risk                                     |
| 2       | Presneill 2002             | Unclear risk                              | Unclear risk                       | Low risk                                      | Low risk                                      | Low risk                                | Unclear risk                                 | Unclear risk                           | Unclear risk                                 |
|         |                            |                                           |                                    |                                               |                                               |                                         |                                              |                                        |                                              |
| 番号      | 著者名 発表年<br>(Forest plot表示) | risk of biasコメント                          |                                    |                                               |                                               |                                         |                                              |                                        |                                              |
| 1       | Paine 2012                 | ブロック化無作為で行われた                             | 封筒法で行われた                           | 研究期間中は治療および結果について研究者や臨床家には盲検化された              | 研究期間中は治療および結果について研究者や臨床家には盲検化された              | 問題になる脱落なし(2例除外された)                      | 100%報告された                                    | 症例の登録が遅く、予定より早期に中止された                  | Lowがほとんどであり、Lowとした                           |
| 2       | Presneill 2002             | ランダム化の方法について記載がなかった                       | ランダム化の方法について記載がなかった                | 薬は企業によってあらかじめ準備され、研究者にはデータ収集が終わるまでは明らかにされなかった | 薬は企業によってあらかじめ準備され、研究者にはデータ収集が終わるまでは明らかにされなかった | 脱落なし                                    | 研究プロトコルが閲覧できなかった                             | 介入で高齢であったが、サンプル数が少ない。評価するのに十分な情報がなかった。 | Unclearの項目が多かった                              |

| Outcome                                   |                               | Severe adverse effects                    | risk of bias                       |                                  |                                  | not serious (0)                         |                                              |                                   |                                              |
|-------------------------------------------|-------------------------------|-------------------------------------------|------------------------------------|----------------------------------|----------------------------------|-----------------------------------------|----------------------------------------------|-----------------------------------|----------------------------------------------|
| 番号                                        | 著者名 発表年<br>(Forest plot表示)    | risk of bias評価                            |                                    |                                  |                                  |                                         |                                              |                                   |                                              |
|                                           |                               | ランダム割付順番の生成<br>random sequence generation | 割り付けの隠蔽化<br>allocation concealment | ブラインド<br>blinding                |                                  | 不完全なアウトカムデータ<br>incomplete outcome data | 選択されたアウトカムの報告<br>selective outcome reporting | その他のバイアス<br>Other sources of bias | 研究内でのバイアスのリスク<br>Risk of bias within a study |
| 研究参加者と治療提供者<br>participants and personnel | アウトカム評価者<br>outcome assessors |                                           |                                    |                                  |                                  |                                         |                                              |                                   |                                              |
| 1                                         | Paine 2012                    | Low risk                                  | Low risk                           | Low risk                         | Low risk                         | Low risk                                | Low risk                                     | High risk                         | Low risk                                     |
|                                           |                               |                                           |                                    |                                  |                                  |                                         |                                              |                                   |                                              |
| 番号                                        | 著者名 発表年<br>(Forest plot表示)    | risk of biasコメント                          |                                    |                                  |                                  |                                         |                                              |                                   |                                              |
| 1                                         | Paine 2012                    | ブロック化無作為で行われた                             | 封筒法で行われた                           | 研究期間中は治療および結果について研究者や臨床家には盲検化された | 研究期間中は治療および結果について研究者や臨床家には盲検化された | 問題になる脱落なし(2例除外された)                      | 100%報告された                                    | 症例の登録が遅く、予定より早期に中止された             | Lowがほとんどであり、Lowとした                           |

| Outcome |                            | Short term mortality                      |                                        | risk of bias                              |                               | not serious (0)                         |                                              |                                   |                                              |
|---------|----------------------------|-------------------------------------------|----------------------------------------|-------------------------------------------|-------------------------------|-----------------------------------------|----------------------------------------------|-----------------------------------|----------------------------------------------|
| 番号      | 著者名 発表年<br>(Forest plot表示) | risk of bias評価                            |                                        |                                           |                               |                                         |                                              |                                   |                                              |
|         |                            | ランダム割付順序の生成<br>random sequence generation | 割り付けの隠蔽化<br>allocation concealment     | ブラインド<br>blinding                         |                               | 不完全なアウトカムデータ<br>incomplete outcome data | 選択されたアウトカムの報告<br>selective outcome reporting | その他のバイアス<br>Other sources of bias | 研究内でのバイアスのリスク<br>Risk of bias within a study |
|         |                            |                                           |                                        | 研究参加者と治療提供者<br>participants and personnel | アウトカム評価者<br>outcome assessors |                                         |                                              |                                   |                                              |
| 1       | Abraham 1996               | Unclear risk                              | Unclear risk                           | Low risk                                  | Low risk                      | Low risk                                | Unclear risk                                 | Unclear risk                      | Unclear risk                                 |
| 2       | Abraham 1999               | Unclear risk                              | Unclear risk                           | Low risk                                  | Low risk                      | Low risk                                | Unclear risk                                 | Unclear risk                      | Unclear risk                                 |
| 3       | Bone 1989                  | Low risk                                  | Low risk                               | Low risk                                  | Low risk                      | Low risk                                | Unclear risk                                 | Unclear risk                      | Low risk                                     |
| 4       | Holcroft 1986              | Low risk                                  | Low risk                               | Low risk                                  | Low risk                      | Low risk                                | Unclear risk                                 | Unclear risk                      | Low risk                                     |
| 5       | Rossignon 1990             | Unclear risk                              | Unclear risk                           | Low risk                                  | Low risk                      | Low risk                                | Unclear risk                                 | Low risk                          | Low risk                                     |
| 6       | Slotman 1992               | Low risk                                  | Low risk                               | Low risk                                  | Low risk                      | Low risk                                | Low risk                                     | Low risk                          | Low risk                                     |
| 7       | Vincent 2001               | Unclear risk                              | Unclear risk                           | Low risk                                  | Low risk                      | Low risk                                | Unclear risk                                 | Low risk                          | Low risk                                     |
|         |                            |                                           |                                        |                                           |                               |                                         |                                              |                                   |                                              |
| 番号      | 著者名 発表年<br>(Forest plot表示) | risk of biasコメント                          |                                        |                                           |                               |                                         |                                              |                                   |                                              |
| 1       | Abraham 1996               | ランダム化の詳細は未記載                              | 割り付けの詳細は不明だが、薬剤師が薬剤のシリンジおよびチューブを覆い隠蔽した | 研究参加者、治療提供者ともブラインド化されている                  | アウトカム評価者もブラインド化されている          | データの欠損がない                               | 評価するための十分な情報がない                              | 評価するための十分な情報がない                   | low3項目、high0項目                               |
| 2       | Abraham 1999               | ランダム化の詳細は未記載                              | 割り付けの詳細は不明だが、薬剤師が薬剤のシリンジおよびチューブを覆い隠蔽した | 研究参加者、治療提供者ともブラインド化されている                  | アウトカム評価者もブラインド化されている          | データの欠損がない                               | 評価するための十分な情報がない                              | 評価するための十分な情報がない                   | low3項目、high0項目                               |
| 3       | Bone 1989                  | 中央割り付けにてランダム化                             | 中央割り付けにてランダム化                          | 研究参加者、治療提供者ともブラインド化されている                  | アウトカム評価者もブラインド化されている          | データの欠損がない                               | 評価するための十分な情報がない                              | 評価するための十分な情報がない                   | low5項目、high0項目                               |
| 4       | Holcroft 1986              | コンピューターによりランダム化                           | コンピューターにより割り付け                         | 研究参加者、治療提供者ともブラインド化されている                  | アウトカム評価者もブラインド化されている          | データの欠損がない                               | 評価するための十分な情報がない                              | 評価するための十分な情報がない                   | low4項目、high0項目                               |
| 5       | Rossignon 1990             | 記載がなく、評価できなかった                            | 記載がなく、評価できなかった                         | 同じ溶媒(エタノール)を用いて、二重盲検で行った                  | 盲検で行われた                       | 100%フォローされている                           | 事前に計画されたプロトコルが閲覧できなかった                       | 事前に計画されたプロトコルが閲覧できなかった            | Lowが多く、Lowとした                                |
| 6       | Slotman 1992               | 適切にランダム化が行われた                             | 研究者たちは割り付けを知らされていなかった。                 | 多施設共同ランダム化プラセボ対照二重盲検試験                    | 多施設共同ランダム化プラセボ対照二重盲検試験        | ほぼ100%フォローされた                           | 100%報告された                                    | 研究の中断なし                           | 全項目Low risk                                  |
| 7       | Vincent 2001               | 記載がなく、評価できなかった                            | 記載がなく、評価できなかった                         | 二重盲検で行われた                                 | 盲検で行われた                       | 死亡以外の脱落は4症例のみ                           | 事前に計画されたプロトコルが閲覧できなかった                       | 予定された中間解析の結果で中止された                | Lowが多く、Lowとした                                |



| Outcome |                            | Severe adverse effects                    |                                        | risk of bias                              |                               | not serious (0)                         |                                              |                                   |                                              |
|---------|----------------------------|-------------------------------------------|----------------------------------------|-------------------------------------------|-------------------------------|-----------------------------------------|----------------------------------------------|-----------------------------------|----------------------------------------------|
| 番号      | 著者名 発表年<br>(Forest plot表示) | risk of bias評価                            |                                        |                                           |                               |                                         |                                              |                                   |                                              |
|         |                            | ランダム割付順序の生成<br>random sequence generation | 割り付けの隠蔽化<br>allocation concealment     | ブラインド<br>blinding                         |                               | 不完全なアウトカムデータ<br>incomplete outcome data | 選択されたアウトカムの報告<br>selective outcome reporting | その他のバイアス<br>Other sources of bias | 研究内でのバイアスのリスク<br>Risk of bias within a study |
|         |                            |                                           |                                        | 研究参加者と治療提供者<br>participants and personnel | アウトカム評価者<br>outcome assessors |                                         |                                              |                                   |                                              |
| 1       | Abraham 1996               | Unclear risk                              | Unclear risk                           | Low risk                                  | Low risk                      | Low risk                                | Unclear risk                                 | Unclear risk                      | Unclear risk                                 |
| 2       | Abraham 1999               | Unclear risk                              | Unclear risk                           | Low risk                                  | Low risk                      | Low risk                                | Unclear risk                                 | Unclear risk                      | Unclear risk                                 |
| 3       | Bone 1989                  | Low risk                                  | Low risk                               | Low risk                                  | Low risk                      | Low risk                                | Unclear risk                                 | Unclear risk                      | Low risk                                     |
| 5       | Rossignon 1990             | Unclear risk                              | Unclear risk                           | Low risk                                  | Low risk                      | Low risk                                | Unclear risk                                 | Low risk                          | Low risk                                     |
|         |                            |                                           |                                        |                                           |                               |                                         |                                              |                                   |                                              |
| 番号      | 著者名 発表年<br>(Forest plot表示) | risk of biasコメント                          |                                        |                                           |                               |                                         |                                              |                                   |                                              |
| 1       | Abraham 1996               | ランダム化の詳細は未記載                              | 割り付けの詳細は不明だが、薬剤師が薬剤のシリンジおよびチューブを覆い隠蔽した | 研究参加者、治療提供者ともブラインド化されている                  | アウトカム評価者もブラインド化されている          | データの欠損がない                               | 評価するための十分な情報がない                              | 評価するための十分な情報がない                   | low3項目、high0項目                               |
| 2       | Abraham 1999               | ランダム化の詳細は未記載                              | 割り付けの詳細は不明だが、薬剤師が薬剤のシリンジおよびチューブを覆い隠蔽した | 研究参加者、治療提供者ともブラインド化されている                  | アウトカム評価者もブラインド化されている          | データの欠損がない                               | 評価するための十分な情報がない                              | 評価するための十分な情報がない                   | low3項目、high0項目                               |
| 3       | Bone 1989                  | 中央割り付けにてランダム化                             | 中央割り付けにてランダム化                          | 研究参加者、治療提供者ともブラインド化されている                  | アウトカム評価者もブラインド化されている          | データの欠損がない                               | 評価するための十分な情報がない                              | 評価するための十分な情報がない                   | low5項目、high0項目                               |
| 5       | Rossignon 1990             | 記載がなく、評価できなかった                            | 記載がなく、評価できなかった                         | 同じ溶媒（エタノール）を用いて、二重盲検で行った                  | 盲検で行われた                       | 100%フォローされている                           | 事前に計画されたプロトコルが閲覧できなかった                       | 事前に計画されたプロトコルが閲覧できなかった            | Lowが多く、Lowとした                                |

| Outcome                                   |                               | Short term mortality                                                     |                                                        | risk of bias判定             |                      | not serious (0)                         |                                              |                                   |                                              |
|-------------------------------------------|-------------------------------|--------------------------------------------------------------------------|--------------------------------------------------------|----------------------------|----------------------|-----------------------------------------|----------------------------------------------|-----------------------------------|----------------------------------------------|
| 番号                                        | 著者名 発表年<br>(Forest plot表示)    | risk of bias評価                                                           |                                                        |                            |                      |                                         |                                              |                                   |                                              |
|                                           |                               | ランダム割付順序の生成<br>random sequence generation                                | 割り付けの隠蔽化<br>allocation concealment                     | ブラインド<br>blinding          |                      | 不完全なアウトカムデータ<br>incomplete outcome data | 選択されたアウトカムの報告<br>selective outcome reporting | その他のバイアス<br>Other sources of bias | 研究内でのバイアスのリスク<br>Risk of bias within a study |
| 研究参加者と治療提供者<br>participants and personnel | アウトカム評価者<br>outcome assessors |                                                                          |                                                        |                            |                      |                                         |                                              |                                   |                                              |
| 2                                         | McAuley 2014                  | Low risk                                                                 | Low risk                                               | Low risk                   | Low risk             | Low risk                                | Low risk                                     | Low risk                          | Low risk                                     |
| 3                                         | Truwit 2014                   | Low risk                                                                 | Unclear risk                                           | Low risk                   | Low risk             | Low risk                                | Low risk                                     | Low risk                          | Low risk                                     |
|                                           |                               |                                                                          |                                                        |                            |                      |                                         |                                              |                                   |                                              |
| 番号                                        | 著者名 発表年<br>(Forest plot表示)    | risk of biasコメント                                                         |                                                        |                            |                      |                                         |                                              |                                   |                                              |
| 2                                         | McAuley 2014                  | 24-hour telephone randomisation serviceを使用し、適切にランダム化された。                 | 24-hour telephone randomisation serviceを使用し、適切に隠蔽化された。 | 割り付けを参加者と治療提供者は知らされていなかった。 | 割り付けを評価者は知らされていなかった。 | ほぼ100%フォローされた                           | 100%報告された                                    | 他のbiasなし                          | 全ての項目がLow risk                               |
| 3                                         | Truwit 2014                   | Interactive Voice Response System (I.V.R.S.) または web-based システムを使用し行われた。 | block法を適用                                              | 参加者と治療提供者に割り付けは知られていなかった。  | 評価者に割り付けは知られていなかった。  | ほぼ100%フォローされた                           | 100%報告された                                    | 他のbiasなし                          | ほぼ全項目Low risk                                |

| Outcome                                   |                               | Severe adverse effects                                    |                                                         | risk of bias               |                      | not serious (0)                         |                                              |                                   |                                              |
|-------------------------------------------|-------------------------------|-----------------------------------------------------------|---------------------------------------------------------|----------------------------|----------------------|-----------------------------------------|----------------------------------------------|-----------------------------------|----------------------------------------------|
| 番号                                        | 著者名 発表年<br>(Forest plot表示)    | risk of bias評価                                            |                                                         |                            |                      |                                         |                                              |                                   |                                              |
|                                           |                               | ランダム割付順序の生成<br>random sequence generation                 | 割り付けの隠蔽化<br>allocation concealment                      | ブラインド<br>blinding          |                      | 不完全なアウトカムデータ<br>incomplete outcome data | 選択されたアウトカムの報告<br>selective outcome reporting | その他のバイアス<br>Other sources of bias | 研究内でのバイアスのリスク<br>Risk of bias within a study |
| 研究参加者と治療提供者<br>participants and personnel | アウトカム評価者<br>outcome assessors |                                                           |                                                         |                            |                      |                                         |                                              |                                   |                                              |
| 1                                         | Craig 2011                    | Low risk                                                  | Low risk                                                | Low risk                   | Low risk             | Low risk                                | Low risk                                     | Low risk                          | Low risk                                     |
| 2                                         | McAuley 2014                  | Low risk                                                  | Low risk                                                | Low risk                   | Low risk             | Low risk                                | Low risk                                     | Low risk                          | Low risk                                     |
|                                           |                               |                                                           |                                                         |                            |                      |                                         |                                              |                                   |                                              |
| 番号                                        | 著者名 発表年<br>(Forest plot表示)    | risk of biasコメント                                          |                                                         |                            |                      |                                         |                                              |                                   |                                              |
| 1                                         | Craig 2011                    | ブロック無作為化で行った                                              | 独立した薬剤師がランダム割付を行い、研究者にブロック数を教えずに無作為化を行った。               | どちらもカブセル化して、盲検化した          | どちらもカブセル化して、盲検化した    | 100%フォローされた                             | 予定したアウトカムが報告されている                            | この研究には他のバイアスはない                   | すべてLowであり、Lowとした                             |
| 2                                         | McAuley 2014                  | 24-hour telephone randomisation serviceを使用した。適切にランダム化された。 | 24-hour telephone randomisation serviceを使用した。適切に隠蔽化された。 | 割り付けを参加者と治療提供者は知らされていなかった。 | 割り付けを評価者は知らされていなかった。 | ほぼ100%フォローされた                           | 100%報告された                                    | 他のbiasなし                          | 全ての項目がLow risk                               |

| Outcome |                            | Short term mortality                      |                                    | risk of bias                              |                               | serious (-1)                            |                                              |                                   |                                              |
|---------|----------------------------|-------------------------------------------|------------------------------------|-------------------------------------------|-------------------------------|-----------------------------------------|----------------------------------------------|-----------------------------------|----------------------------------------------|
| 番号      | 著者名 発表年<br>(Forest plot表示) | risk of bias評価                            |                                    |                                           |                               |                                         |                                              |                                   |                                              |
|         |                            | ランダム割付順序の生成<br>random sequence generation | 割り付けの隠蔽化<br>allocation concealment | ブラインド<br>blinding                         |                               | 不完全なアウトカムデータ<br>incomplete outcome data | 選択されたアウトカムの報告<br>selective outcome reporting | その他のバイアス<br>Other sources of bias | 研究内でのバイアスのリスク<br>Risk of bias within a study |
|         |                            |                                           |                                    | 研究参加者と治療提供者<br>participants and personnel | アウトカム評価者<br>outcome assessors |                                         |                                              |                                   |                                              |
| 1       | Anzueto 1996               | Low risk                                  | Low risk                           | Low risk                                  | Low risk                      | Low risk                                | Unclear risk                                 | Low risk                          | Low risk                                     |
| 2       | Gregory 1997               | Unclear risk                              | Unclear risk                       | High risk                                 | High risk                     | Low risk                                | Unclear risk                                 | Low risk                          | Unclear risk                                 |
| 3       | Kesecioglu 2009            | Low risk                                  | Low risk                           | High risk                                 | High risk                     | Low risk                                | Unclear risk                                 | Low risk                          | Low risk                                     |
| 4       | Markart 2007               | Unclear risk                              | Unclear risk                       | High risk                                 | High risk                     | Low risk                                | Low risk                                     | Low risk                          | Unclear risk                                 |
| 5       | Spragg 2003                | Unclear risk                              | Unclear risk                       | High risk                                 | High risk                     | Low risk                                | Unclear risk                                 | Unclear risk                      | High risk                                    |
| 6       | Spragg 2004                | Unclear risk                              | Unclear risk                       | Low risk                                  | Low risk                      | Low risk                                | Low risk                                     | Low risk                          | Low risk                                     |
| 7       | Spragg 2011                | Low risk                                  | Low risk                           | Low risk                                  | Low risk                      | Low risk                                | Low risk                                     | Low risk                          | Low risk                                     |
| 9       | Weg 1994                   | Unclear risk                              | Unclear risk                       | Low risk                                  | Unclear risk                  | Low risk                                | Unclear risk                                 | Unclear risk                      | Unclear risk                                 |
| 10      | Willson 2015               | Low risk                                  | Unclear risk                       | Low risk                                  | Low risk                      | Low risk                                | Low risk                                     | High risk                         | Low risk                                     |
|         |                            |                                           |                                    |                                           |                               |                                         |                                              |                                   |                                              |
| 番号      | 著者名 発表年<br>(Forest plot表示) | risk of biasコメント                          |                                    |                                           |                               |                                         |                                              |                                   |                                              |
| 1       | Anzueto 1996               | 中央割付でコンピューターによるランダム化を行った                  | 中央割付でコンピューターによるランダム化を行った           | 不透明な容器にいれ盲検化された                           | 不透明な容器にいれ盲検化された               | 100%フォローされた                             | 事前に計画されたプロトコルが閲覧できなかった                       | この研究には他のバイアスはない                   | Lowが多く、Lowとした                                |
| 2       | Gregory 1997               | 記載がなく、評価できなかった                            | 記載がなく、評価できなかった                     | 非盲検で行われた                                  | 非盲検で行われた                      | 100%フォローされた                             | 事前に計画されたプロトコルが閲覧できなかった                       | この研究には他のバイアスはない                   | Unclearが多く、LowとHighがそれぞれ2項目ずつあり、Unclearとした   |
| 3       | Kesecioglu 2009            | 電話にて中央割付で行われた                             | 電話にて中央割付で行われた                      | 安全な擬似薬はなく、非盲検で行われた                        | 安全な擬似薬はなく、非盲検で行われた            | フォローアップできなかったのは1例のみ                     | 事前に計画されたプロトコルが閲覧できなかった                       | 予定された中間解析で死亡率上昇の傾向があり、中止された       | 全体的にLowが多く、Lowとした                            |
| 4       | Markart 2007               | 記載がなく、評価できなかった                            | 記載がなく、評価できなかった                     | 対照群がプラセボではなく、非使用群                         | 対照群がプラセボではなく、非使用群             | 100%フォローされた                             | 事前に設定したoutcomeが報告されている                       | この研究には他のバイアスはない                   | Lowが多いが、UnclearとHighが2項目ずつあり、Unclearとした      |
| 5       | Spragg 2003                | ランダム化の方法は未記載                              | 隠蔽化は未記載                            | 盲検化されていない                                 | 盲検化されていない                     | 100%フォローされた                             | 判断には情報が不十分                                   | 判断には情報が不十分                        | Low riskが1項目のみ                               |
| 6       | Spragg 2004                | 記載がなく、評価できなかった                            | 記載がなく、評価できなかった                     | 容器や投与するカテーテルも不透明にし盲検化した                   | 容器や投与するカテーテルも不透明にし盲検化した       | 100%フォローされた                             | 予定されていたアウトカムは報告されていた                         | この研究には他のバイアスはない                   | Lowがほとんどであり、Lowとした                           |
| 7       | Spragg 2011                | コンピューターが生成した乱数を使用し、適切にランダム化された。           | コンピューターが生成した乱数を使用し、適切に隠蔽化された。      | 割り付けを参加者と治療提供者は知らされていない。                  | 割り付けを評価者は知らされていない。            | ほぼ100%フォローされた                           | 100%報告された                                    | その他のbiasなし                        | 全ての項目がLow risk                               |
| 9       | Weg 1994                   | ランダム化の方法の情報が不十分                           | 割り付けの方法が未記載                        | 盲検化されていた。                                 | 記載なし                          | 100%フォローされた。                            | 評価するには不十分な情報                                 | 評価するには不十分な情報                      | Unclearが多い                                   |
| 10      | Willson 2015               | 乱数表を用いて割り付けられた                            | allocationはblock法                  | 割り付けを参加者と治療提供者は知らされていない。                  | 割り付けを評価者は知らされていない。            | ほぼ100%フォローされた                           | 100%報告された                                    | 研究がスポンサーの意向で中止                    | 全項目ほぼLow risk                                |

| Outcome |                            | Severe adverse effects                    |                                    | risk of bias                              |                               | not serious (0)                         |                                              |                                   |                                              |
|---------|----------------------------|-------------------------------------------|------------------------------------|-------------------------------------------|-------------------------------|-----------------------------------------|----------------------------------------------|-----------------------------------|----------------------------------------------|
| 番号      | 著者名 発表年<br>(Forest plot表示) | risk of bias評価                            |                                    |                                           |                               |                                         |                                              |                                   |                                              |
|         |                            | ランダム割付順序の生成<br>random sequence generation | 割り付けの隠蔽化<br>allocation concealment | ブラインド<br>blinding                         |                               | 不完全なアウトカムデータ<br>incomplete outcome data | 選択されたアウトカムの報告<br>selective outcome reporting | その他のバイアス<br>Other sources of bias | 研究内でのバイアスのリスク<br>Risk of bias within a study |
|         |                            |                                           |                                    | 研究参加者と治療提供者<br>participants and personnel | アウトカム評価者<br>outcome assessors |                                         |                                              |                                   |                                              |
| 1       | Anzueto 1996               | Low risk                                  | Low risk                           | Low risk                                  | Low risk                      | Low risk                                | Unclear risk                                 | Low risk                          | Low risk                                     |
| 2       | Gregory 1997               | Unclear risk                              | Unclear risk                       | High risk                                 | High risk                     | Low risk                                | Unclear risk                                 | Low risk                          | Unclear risk                                 |
| 3       | Kesecioglu 2009            | Low risk                                  | Low risk                           | High risk                                 | High risk                     | Low risk                                | Unclear risk                                 | Low risk                          | Low risk                                     |
| 6       | Spragg 2004                | Unclear risk                              | Unclear risk                       | Low risk                                  | Low risk                      | Low risk                                | Low risk                                     | Low risk                          | Low risk                                     |
| 7       | Spragg 2011                | Low risk                                  | Low risk                           | Low risk                                  | Low risk                      | Low risk                                | Low risk                                     | Low risk                          | Low risk                                     |
| 10      | Willson 2015               | Low risk                                  | Unclear risk                       | Low risk                                  | Low risk                      | Low risk                                | Low risk                                     | High risk                         | Low risk                                     |
|         |                            |                                           |                                    |                                           |                               |                                         |                                              |                                   |                                              |
| 番号      | 著者名 発表年<br>(Forest plot表示) | risk of biasコメント                          |                                    |                                           |                               |                                         |                                              |                                   |                                              |
| 1       | Anzueto 1996               | 中央割付でコンピューターによるランダム化を行った                  | 中央割付でコンピューターによるランダム化を行った           | 不透明な容器にいれ盲検化された                           | 不透明な容器にいれ盲検化された               | 100%フォローされた                             | 事前に計画されたプロトコルが閲覧できなかった                       | この研究には他のバイアスはない                   | Lowが多く、Lowとした                                |
| 2       | Gregory 1997               | 記載がなく、評価できなかった                            | 記載がなく、評価できなかった                     | 非盲検で行われた                                  | 非盲検で行われた                      | 100%フォローされた                             | 事前に計画されたプロトコルが閲覧できなかった                       | この研究には他のバイアスはない                   | Unclearが多く、LowとHighがそれぞれ2項目ずつあり、Unclearとした   |
| 3       | Kesecioglu 2009            | 電話にて中央割付で行われた                             | 電話にて中央割付で行われた                      | 安全な疑似薬はなく、非盲検で行われた                        | 安全な疑似薬はなく、非盲検で行われた            | フォローアップできなかったのは1例のみ                     | 事前に計画されたプロトコルが閲覧できなかった                       | 予定された中間解析で死亡率上昇の傾向があり、中止された       | 全体的にLowが多く、Lowとした                            |
| 6       | Spragg 2004                | 記載がなく、評価できなかった                            | 記載がなく、評価できなかった                     | 容器や投与するカテーテルも不透明にし盲検化した                   | 容器や投与するカテーテルも不透明にし盲検化した       | 100%フォローされた                             | 予定されていたアウトカムは報告されていた                         | この研究には他のバイアスはない                   | Lowがほとんどであり、Lowとした                           |
| 7       | Spragg 2011                | コンピューターが生成した乱数を使用し、適切にランダム化された。           | コンピューターが生成した乱数を使用し、適切に隠蔽化された。      | 割り付けを参加者と治療提供者は知らされていない。                  | 割り付けを評価者は知らされていない。            | ほぼ100%フォローされた                           | 100%報告された                                    | その他のbiasなし                        | 全ての項目がLow risk                               |
| 10      | Willson 2015               | 乱数表を用いて割り付けられた                            | allocationはblock法                  | 割り付けを参加者と治療提供者は知らされていない。                  | 割り付けを評価者は知らされていない。            | ほぼ100%フォローされた                           | 100%報告された                                    | 研究がスポンサーの意向で中止                    | 全項目ほぼLow risk                                |

| Outcome                                   |                               | Short term mortality                      |                                    | risk of bias      |                   | not serious (0)                         |                                              |                                   |                                              |
|-------------------------------------------|-------------------------------|-------------------------------------------|------------------------------------|-------------------|-------------------|-----------------------------------------|----------------------------------------------|-----------------------------------|----------------------------------------------|
| 番号                                        | 著者名 発表年<br>(Forest plot表示)    | risk of bias評価                            |                                    |                   |                   |                                         |                                              |                                   |                                              |
|                                           |                               | ランダム割付順序の生成<br>random sequence generation | 割り付けの隠蔽化<br>allocation concealment | ブラインド<br>blinding |                   | 不完全なアウトカムデータ<br>incomplete outcome data | 選択されたアウトカムの報告<br>selective outcome reporting | その他のバイアス<br>Other sources of bias | 研究内でのバイアスのリスク<br>Risk of bias within a study |
| 研究参加者と治療提供者<br>participants and personnel | アウトカム評価者<br>outcome assessors |                                           |                                    |                   |                   |                                         |                                              |                                   |                                              |
| 1                                         | Cornet 2014                   | Low risk                                  | High risk                          | High risk         | Low risk          | Low risk                                | Low risk                                     | Low risk                          | Low risk                                     |
| 2                                         | Liu 2008                      | Unclear risk                              | Low risk                           | Low risk          | Low risk          | Low risk                                | Low risk                                     | Low risk                          | Low risk                                     |
|                                           |                               |                                           |                                    |                   |                   |                                         |                                              |                                   |                                              |
| 番号                                        | 著者名 発表年<br>(Forest plot表示)    | risk of biasコメント                          |                                    |                   |                   |                                         |                                              |                                   |                                              |
| 1                                         | Cornet 2014                   | ランダム化はCONSORTガイドラインに準じ、適切にランダム化された。       | オープンラベルが適用されている                    | オープンラベルが適用されている   | オープンラベルが評価に影響しにくい | 100%フォローされた                             | 100%報告された                                    | 研究の中断なし                           | Low risk 5 High risk 2                       |
| 2                                         | Liu 2008                      | ランダム化の方法が未記載                              | 隠蔽された置換ブロック法                       | ブラインド化の記載あり       | ブラインド化の記載あり       | データが欠損していない                             | 100%報告されている                                  | 研究の中断なし                           | low5項目                                       |

| Outcome                                   |                               | Severe adverse effects                    |                                    | risk of bias      |                          | serious (-1)                            |                                              |                                   |                                              |
|-------------------------------------------|-------------------------------|-------------------------------------------|------------------------------------|-------------------|--------------------------|-----------------------------------------|----------------------------------------------|-----------------------------------|----------------------------------------------|
| 番号                                        | 著者名 発表年<br>(Forest plot表示)    | risk of bias評価                            |                                    |                   |                          |                                         |                                              |                                   |                                              |
|                                           |                               | ランダム割付順序の生成<br>random sequence generation | 割り付けの隠蔽化<br>allocation concealment | ブラインド<br>blinding |                          | 不完全なアウトカムデータ<br>incomplete outcome data | 選択されたアウトカムの報告<br>selective outcome reporting | その他のバイアス<br>Other sources of bias | 研究内でのバイアスのリスク<br>Risk of bias within a study |
| 研究参加者と治療提供者<br>participants and personnel | アウトカム評価者<br>outcome assessors |                                           |                                    |                   |                          |                                         |                                              |                                   |                                              |
| 1                                         | Cornet 2014                   | Low risk                                  | High risk                          | High risk         | High risk                | Low risk                                | Low risk                                     | Low risk                          | High risk                                    |
| 2                                         | Liu 2008                      | Unclear risk                              | Low risk                           | Low risk          | Low risk                 | Low risk                                | Low risk                                     | Low risk                          | Low risk                                     |
|                                           |                               |                                           |                                    |                   |                          |                                         |                                              |                                   |                                              |
| 番号                                        | 著者名 発表年<br>(Forest plot表示)    | risk of biasコメント                          |                                    |                   |                          |                                         |                                              |                                   |                                              |
| 1                                         | Cornet 2014                   | ランダム化はCONSORTガイドラインに準じ、適切にランダム化された。       | オープンラベルが適用されている                    | オープンラベルが適用されている   | オープンラベルが評価に影響している可能性がある。 | 100%フォローされた                             | 100%報告された                                    | 研究の中断なし                           | Low risk 4 High risk 3                       |
| 2                                         | Liu 2008                      | ランダム化の方法が未記載                              | 隠蔽された置換ブロック法                       | ブラインド化の記載あり       | ブラインド化の記載あり              | データが欠損していない                             | 100%報告されている                                  | 研究の中断なし                           | low5項目                                       |

| Outcome                                   |                               | Short term mortality                      |                                    | risk of bias              |                      | not serious (0)                         |                                              |                                   |                                              |
|-------------------------------------------|-------------------------------|-------------------------------------------|------------------------------------|---------------------------|----------------------|-----------------------------------------|----------------------------------------------|-----------------------------------|----------------------------------------------|
| 番号                                        | 著者名 発表年<br>(Forest plot表示)    | risk of bias評価                            |                                    |                           |                      |                                         |                                              |                                   |                                              |
|                                           |                               | ランダム割付順序の生成<br>random sequence generation | 割り付けの隠蔽化<br>allocation concealment | ブラインド<br>blinding         |                      | 不完全なアウトカムデータ<br>incomplete outcome data | 選択されたアウトカムの報告<br>selective outcome reporting | その他のバイアス<br>Other sources of bias | 研究内でのバイアスのリスク<br>Risk of bias within a study |
| 研究参加者と治療提供者<br>participants and personnel | アウトカム評価者<br>outcome assessors |                                           |                                    |                           |                      |                                         |                                              |                                   |                                              |
| 1                                         | Bernard 1997                  | Low risk                                  | Low risk                           | Low risk                  | Low risk             | Low risk                                | Unclear risk                                 | Low risk                          | Low risk                                     |
| 2                                         | Jepsen 1992                   | Unclear risk                              | Unclear risk                       | Low risk                  | Low risk             | Low risk                                | Unclear risk                                 | Low risk                          | Low risk                                     |
| 3                                         | Ortolani 2000                 | Unclear risk                              | Unclear risk                       | High risk                 | High risk            | Low risk                                | Unclear risk                                 | Unclear risk                      | Unclear risk                                 |
| 4                                         | Suter 1994                    | Unclear risk                              | Unclear risk                       | Low risk                  | Low risk             | Low risk                                | Unclear risk                                 | Low risk                          | Low risk                                     |
|                                           |                               |                                           |                                    |                           |                      |                                         |                                              |                                   |                                              |
| 番号                                        | 著者名 発表年<br>(Forest plot表示)    | risk of biasコメント                          |                                    |                           |                      |                                         |                                              |                                   |                                              |
| 1                                         | Bernard 1997                  | コンピューターによるブロック無作為化                        | コンピューターによるブロック無作為化                 | 同じ量に希釈され、盲検化された           | 同じ量に希釈され、盲検化された      | 96%フォローされた                              | 事前に計画されたプロトコルが閲覧できなかった                       | この研究には他のバイアスがない                   | Lowが多く、Lowとした                                |
| 2                                         | Jepsen 1992                   | 記載なし                                      | 記載なし                               | 二重盲検で行われた                 | 盲検で行われた              | 100%フォローされた                             | 事前に計画されたプロトコルが閲覧できなかった                       | この研究には、他のバイアスがない                  | Low 4項目>Unclear3項目で、Lowとした                   |
| 3                                         | Ortolani 2000                 | ランダム化に関する詳細不明                             | 割り付けに関する詳細不明                       | 研究参加者、治療提供者ともブラインド化されていない | アウトカム評価者ブラインド化されていない | データの欠損がない                               | 評価するための十分な情報がない                              | 評価するための十分な情報がない                   | low1項目、high2項目                               |
| 4                                         | Suter 1994                    | ランダム化に関する詳細不明                             | 割り付けに関する詳細不明                       | 研究参加者、治療提供者ともブラインド化されている  | アウトカム評価者もブラインド化されている | データの欠損がない                               | 評価するための十分な情報がない                              | 他のバイアスなし                          | low4項目、high0項目                               |



| Outcome                                   |                               | Short term mortality                      |                                    | risk of bias                           |                      | not serious (0)                         |                                              |                                   |                                              |
|-------------------------------------------|-------------------------------|-------------------------------------------|------------------------------------|----------------------------------------|----------------------|-----------------------------------------|----------------------------------------------|-----------------------------------|----------------------------------------------|
| 番号                                        | 著者名 発表年<br>(Forest plot表示)    | risk of bias評価                            |                                    |                                        |                      |                                         |                                              |                                   |                                              |
|                                           |                               | ランダム割付順番の生成<br>random sequence generation | 割り付けの隠蔽化<br>allocation concealment | ブラインド<br>blinding                      |                      | 不完全なアウトカムデータ<br>incomplete outcome data | 選択されたアウトカムの報告<br>selective outcome reporting | その他のバイアス<br>Other sources of bias | 研究内でのバイアスのリスク<br>Risk of bias within a study |
| 研究参加者と治療提供者<br>participants and personnel | アウトカム評価者<br>outcome assessors |                                           |                                    |                                        |                      |                                         |                                              |                                   |                                              |
| 1                                         | ARDSnet 2000                  | Low risk                                  | Low risk                           | Low risk                               | Low risk             | Unclear risk                            | Unclear risk                                 | Unclear risk                      | Low risk                                     |
|                                           |                               |                                           |                                    |                                        |                      |                                         |                                              |                                   |                                              |
| 番号                                        | 著者名 発表年<br>(Forest plot表示)    | risk of biasコメント                          |                                    |                                        |                      |                                         |                                              |                                   |                                              |
| 1                                         | ARDSnet 2000                  | 中央割り付けで、コンピュータを用いてランダム化された                | 中央割り付けで、コンピュータを用いてランダム化された         | 研究参加者、治療提供者(医師、看護師、呼吸療法士)ともブラインド化されている | アウトカム評価者もブラインド化されている | 院内死亡のみ記載(K-M曲線を見ると90日以降死亡率はほとんど変化なし)    | 評価するための十分な情報がない                              | 有効性を証明できず試験中断                     | low4項目、high0項目                               |

| Outcome                                   |                               | Severe adverse effects                    |                                    | risk of bias                           |                      | not serious (0)                         |                                              |                                   |                                              |
|-------------------------------------------|-------------------------------|-------------------------------------------|------------------------------------|----------------------------------------|----------------------|-----------------------------------------|----------------------------------------------|-----------------------------------|----------------------------------------------|
| 番号                                        | 著者名 発表年<br>(Forest plot表示)    | risk of bias評価                            |                                    |                                        |                      |                                         |                                              |                                   |                                              |
|                                           |                               | ランダム割付順番の生成<br>random sequence generation | 割り付けの隠蔽化<br>allocation concealment | ブラインド<br>blinding                      |                      | 不完全なアウトカムデータ<br>incomplete outcome data | 選択されたアウトカムの報告<br>selective outcome reporting | その他のバイアス<br>Other sources of bias | 研究内でのバイアスのリスク<br>Risk of bias within a study |
| 研究参加者と治療提供者<br>participants and personnel | アウトカム評価者<br>outcome assessors |                                           |                                    |                                        |                      |                                         |                                              |                                   |                                              |
| 1                                         | ARDSnet 2000                  | Low risk                                  | Low risk                           | Low risk                               | Low risk             | Low risk                                | Unclear risk                                 | Unclear risk                      | Low risk                                     |
|                                           |                               |                                           |                                    |                                        |                      |                                         |                                              |                                   |                                              |
| 番号                                        | 著者名 発表年<br>(Forest plot表示)    | risk of biasコメント                          |                                    |                                        |                      |                                         |                                              |                                   |                                              |
| 1                                         | ARDSnet 2000                  | 中央割り付けで、コンピュータを用いてランダム化された                | 中央割り付けで、コンピュータを用いてランダム化された         | 研究参加者、治療提供者(医師、看護師、呼吸療法士)ともブラインド化されている | アウトカム評価者もブラインド化されている | データの欠損がない                               | 評価するための十分な情報がない                              | 有効性を証明できず試験中断                     | low5項目、high0項目                               |

| Outcome                                   |                               | Short term mortality                      | risk of bias                       |                        |                        | not serious (0)                         |                                              |                                   |                                              |
|-------------------------------------------|-------------------------------|-------------------------------------------|------------------------------------|------------------------|------------------------|-----------------------------------------|----------------------------------------------|-----------------------------------|----------------------------------------------|
| 番号                                        | 著者名 発表年<br>(Forest plot表示)    | risk of bias評価                            |                                    |                        |                        |                                         |                                              |                                   |                                              |
|                                           |                               | ランダム割付順序の生成<br>random sequence generation | 割り付けの隠蔽化<br>allocation concealment | ブラインド<br>blinding      |                        | 不完全なアウトカムデータ<br>incomplete outcome data | 選択されたアウトカムの報告<br>selective outcome reporting | その他のバイアス<br>Other sources of bias | 研究内でのバイアスのリスク<br>Risk of bias within a study |
| 研究参加者と治療提供者<br>participants and personnel | アウトカム評価者<br>outcome assessors |                                           |                                    |                        |                        |                                         |                                              |                                   |                                              |
| 1                                         | Wiedemann 2002                | Low risk                                  | Low risk                           | Low risk               | Low risk               | Low risk                                | Unclear risk                                 | Unclear risk                      | Low risk                                     |
|                                           |                               |                                           |                                    |                        |                        |                                         |                                              |                                   |                                              |
| 番号                                        | 著者名 発表年<br>(Forest plot表示)    | risk of biasコメント                          |                                    |                        |                        |                                         |                                              |                                   |                                              |
| 1                                         | Wiedemann 2002                | コンピュータが生成した割り付けにより行われた                    | 多施設共同ランダム化ブラセボ対照二重盲検試験             | 多施設共同ランダム化ブラセボ対照二重盲検試験 | 多施設共同ランダム化ブラセボ対照二重盲検試験 | 100%報告された                               | 評価には情報が不十分                                   | 評価には情報が不十分                        | Low risk 5 Unclear risk 2                    |

## Short term mortality

|                | Random sequence generation (selection bias) | Allocation concealment (selection bias) | Blinding of participants and personnel (performance bias) | Blinding of outcome assessment (detection bias) | Incomplete outcome data (attrition bias) | Selective reporting (reporting bias) | Other bias |
|----------------|---------------------------------------------|-----------------------------------------|-----------------------------------------------------------|-------------------------------------------------|------------------------------------------|--------------------------------------|------------|
| Dellinger 1998 | ?                                           | ?                                       | +                                                         | +                                               | +                                        | ?                                    | -          |
| Gerlach 2003   | +                                           | +                                       | -                                                         | -                                               | +                                        | ?                                    | +          |
| Mehta 2001     | +                                           | +                                       | -                                                         | -                                               | +                                        | ?                                    | ?          |
| Michael 1998   | ?                                           | ?                                       | -                                                         | +                                               | ?                                        | +                                    | +          |
| Park 2003      | -                                           | -                                       | -                                                         | -                                               | +                                        | ?                                    | +          |
| Taylor 2004    | +                                           | +                                       | +                                                         | +                                               | +                                        | ?                                    | -          |
| Troncy 1998    | ?                                           | ?                                       | -                                                         | -                                               | +                                        | +                                    | ?          |

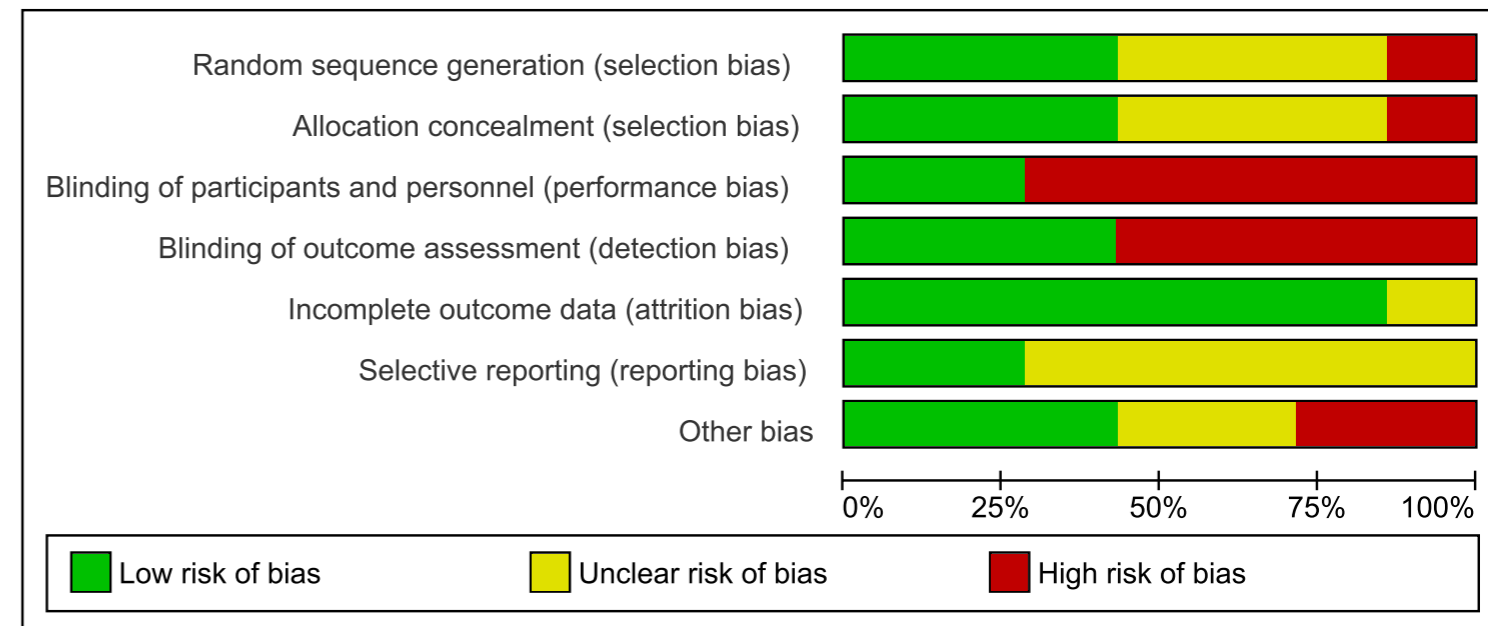

## Severe complication

|                | Random sequence generation (selection bias) | Allocation concealment (selection bias) | Blinding of participants and personnel (performance bias) | Blinding of outcome assessment (detection bias) | Incomplete outcome data (attrition bias) | Selective reporting (reporting bias) | Other bias |
|----------------|---------------------------------------------|-----------------------------------------|-----------------------------------------------------------|-------------------------------------------------|------------------------------------------|--------------------------------------|------------|
| Dellinger 1998 | ?                                           | ?                                       | +                                                         | +                                               | +                                        | ?                                    | -          |
| Taylor 2004    | +                                           | +                                       | +                                                         | +                                               | +                                        | ?                                    | -          |

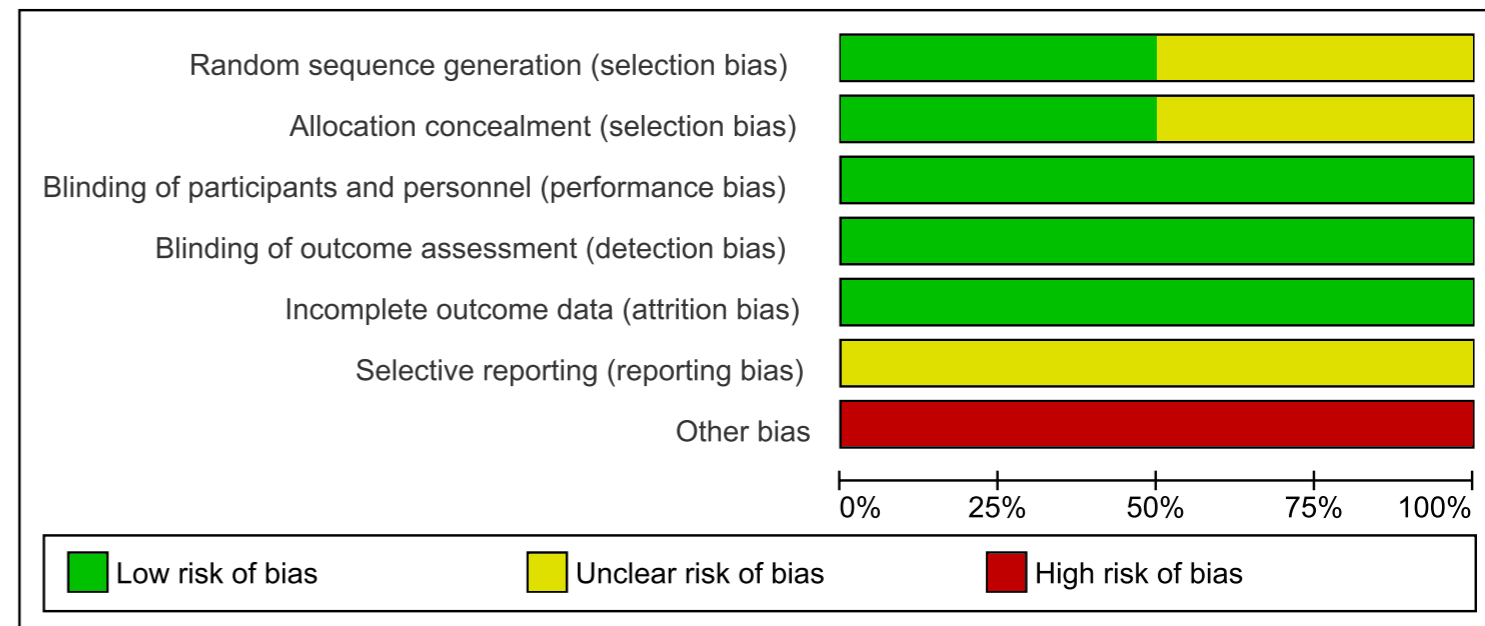

## Short term mortality

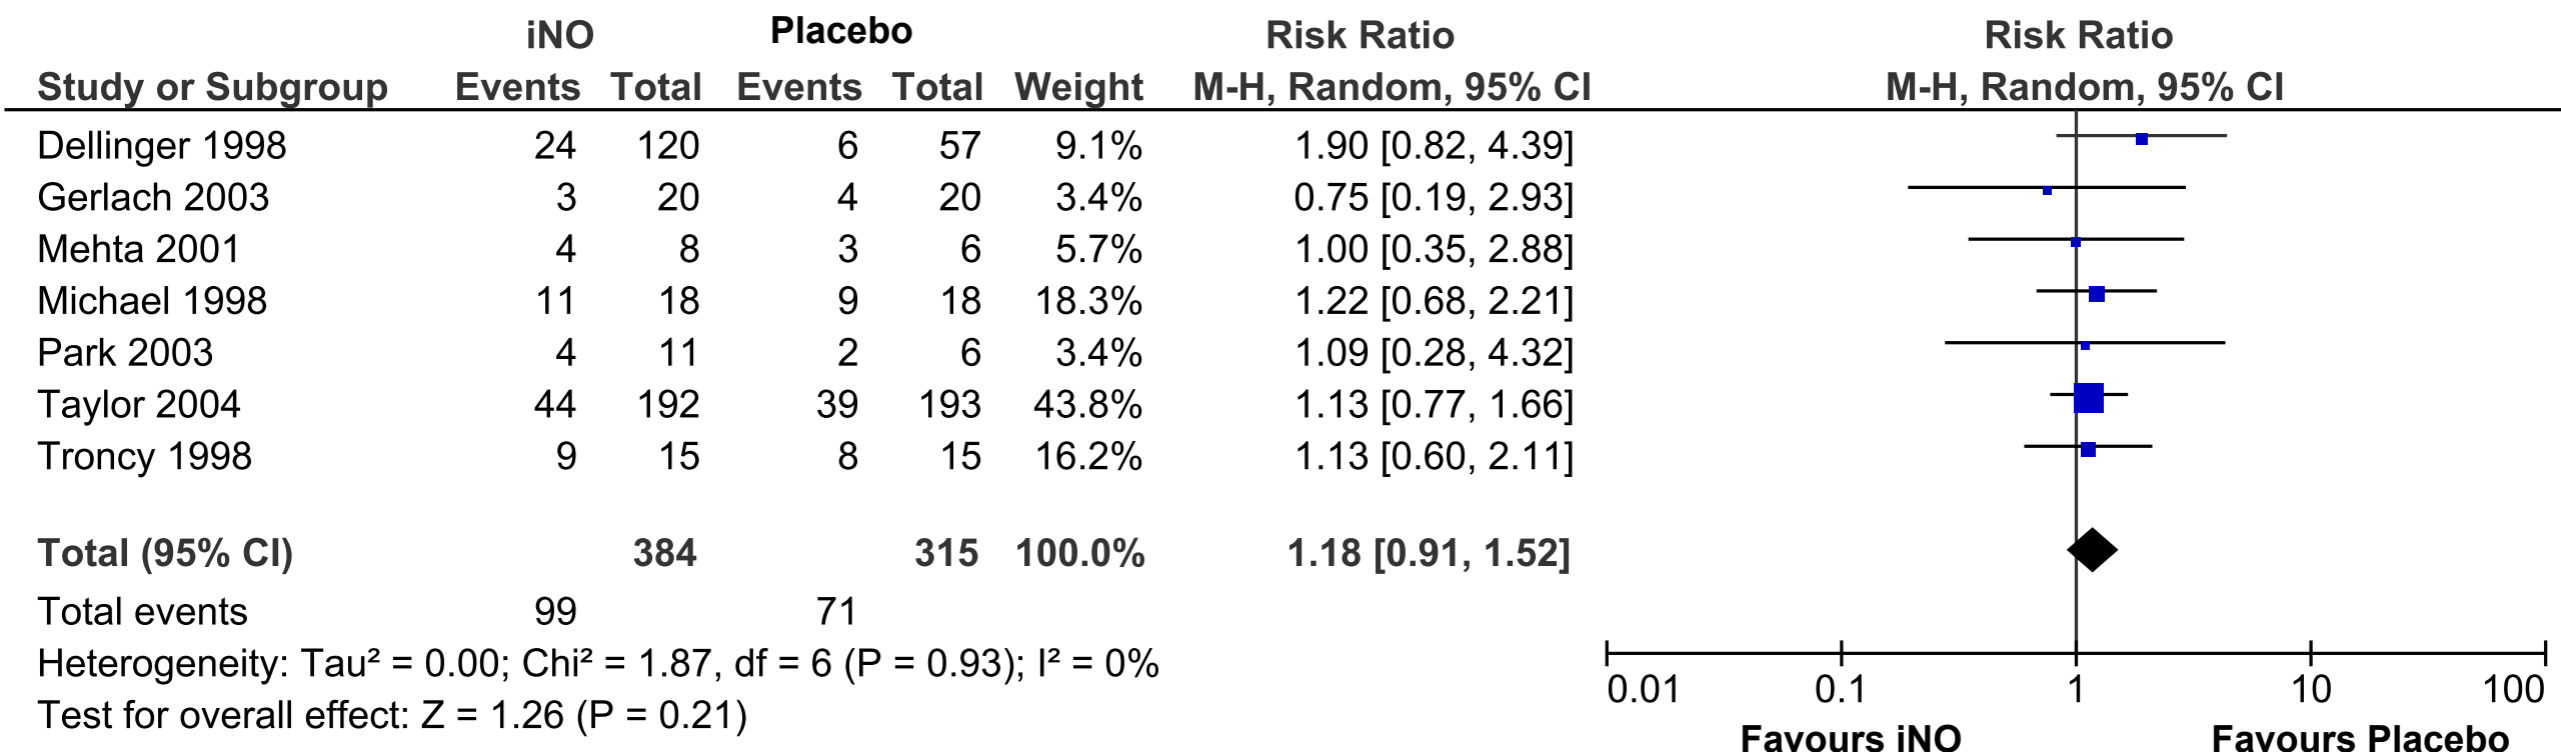

## Severe complication

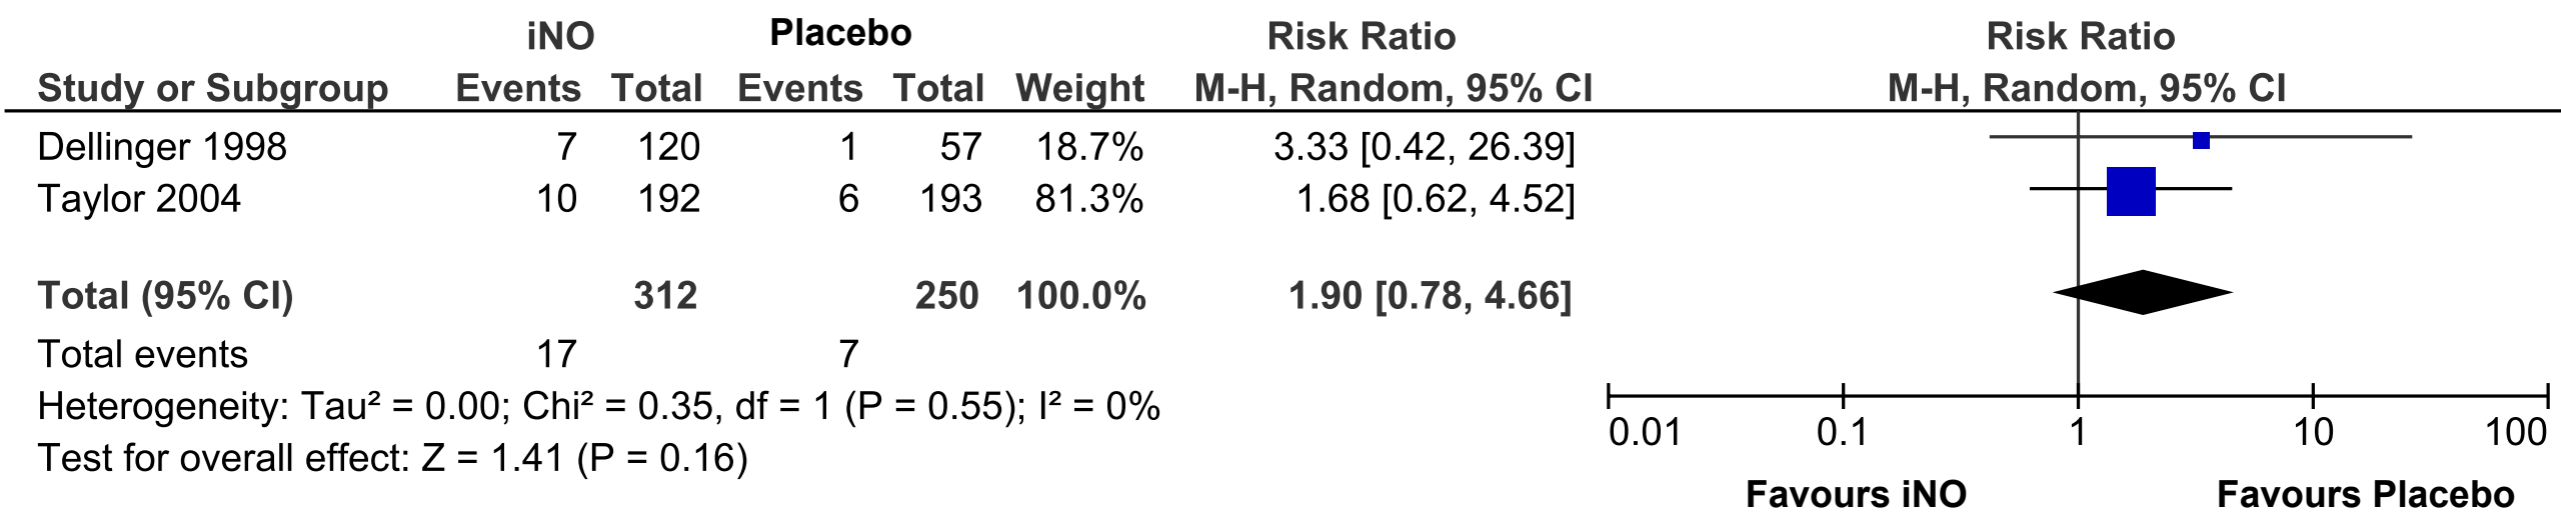

Matthay 2011

|                                                           |   |
|-----------------------------------------------------------|---|
| Random sequence generation (selection bias)               | + |
| Allocation concealment (selection bias)                   | + |
| Blinding of participants and personnel (performance bias) | + |
| Blinding of outcome assessment (detection bias)           | + |
| Incomplete outcome data (attrition bias)                  | + |
| Selective reporting (reporting bias)                      | + |
| Other bias                                                | + |

## Short term mortality

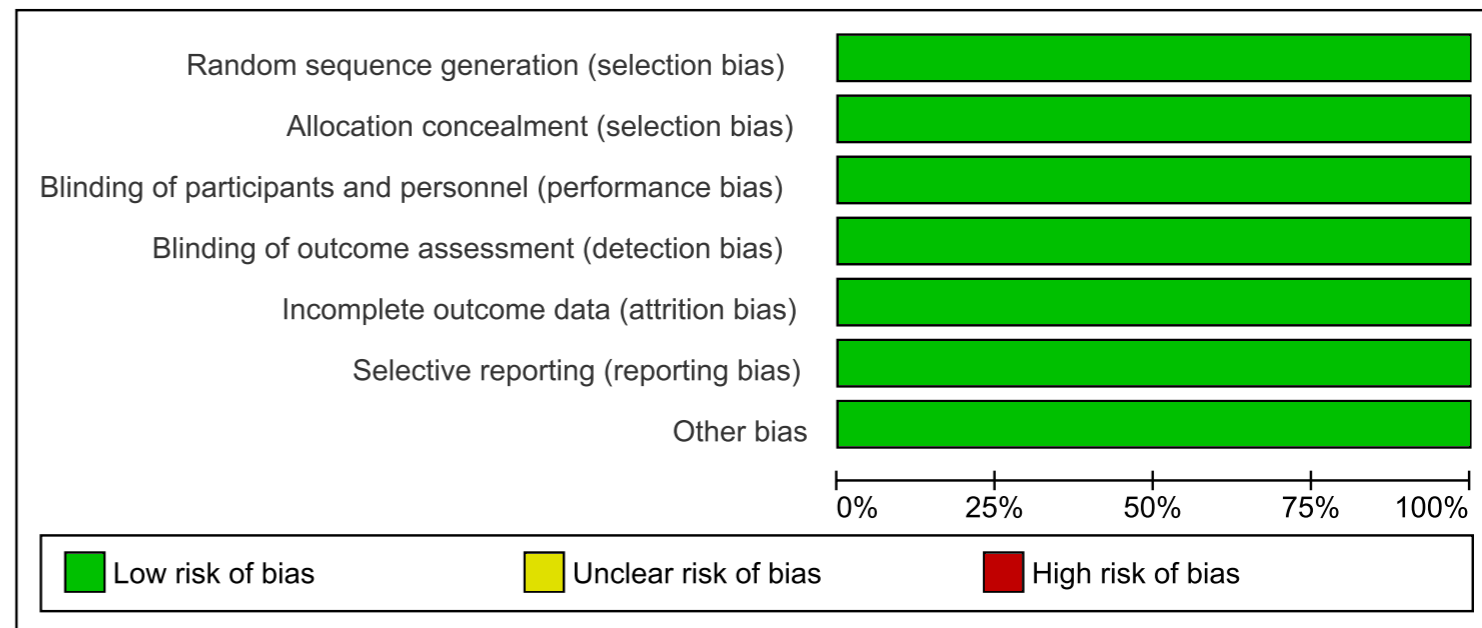

Matthay 2011

|   |                                                           |
|---|-----------------------------------------------------------|
| + | Random sequence generation (selection bias)               |
| + | Allocation concealment (selection bias)                   |
| + | Blinding of participants and personnel (performance bias) |
| + | Blinding of outcome assessment (detection bias)           |
| + | Incomplete outcome data (attrition bias)                  |
| + | Selective reporting (reporting bias)                      |
| + | Other bias                                                |

## Severe complication

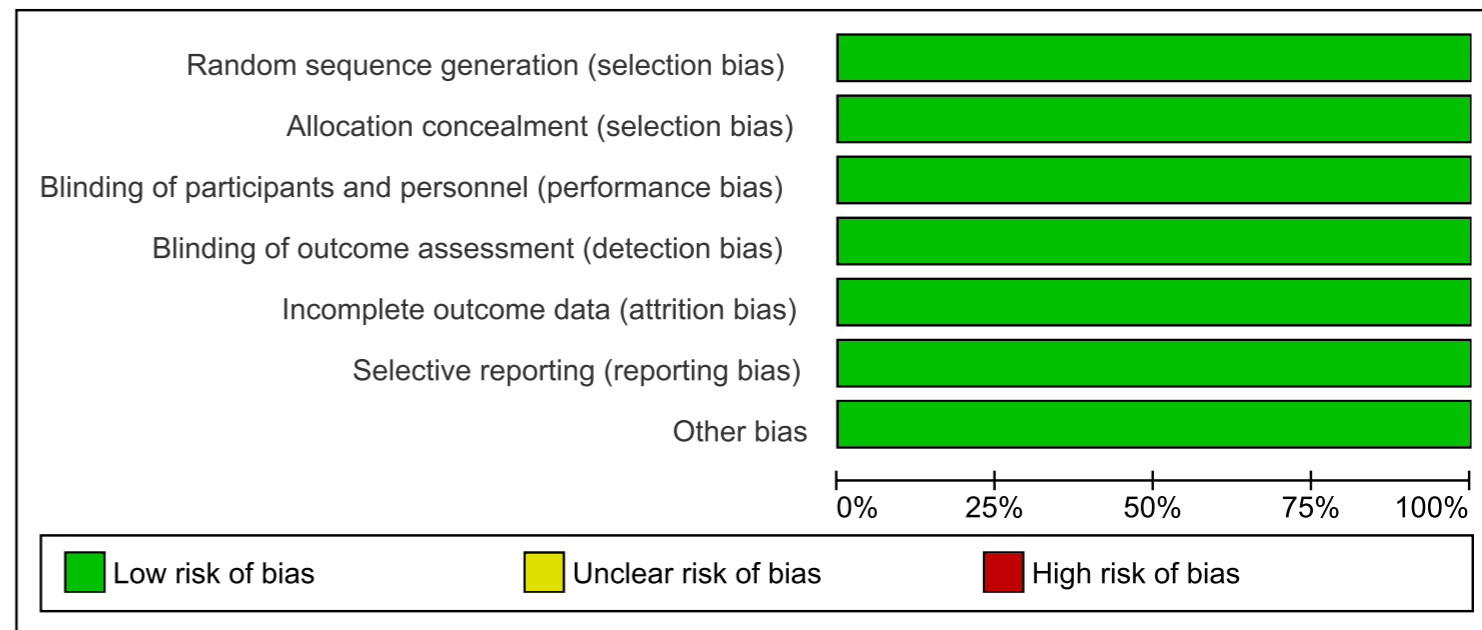



## Short term mortality

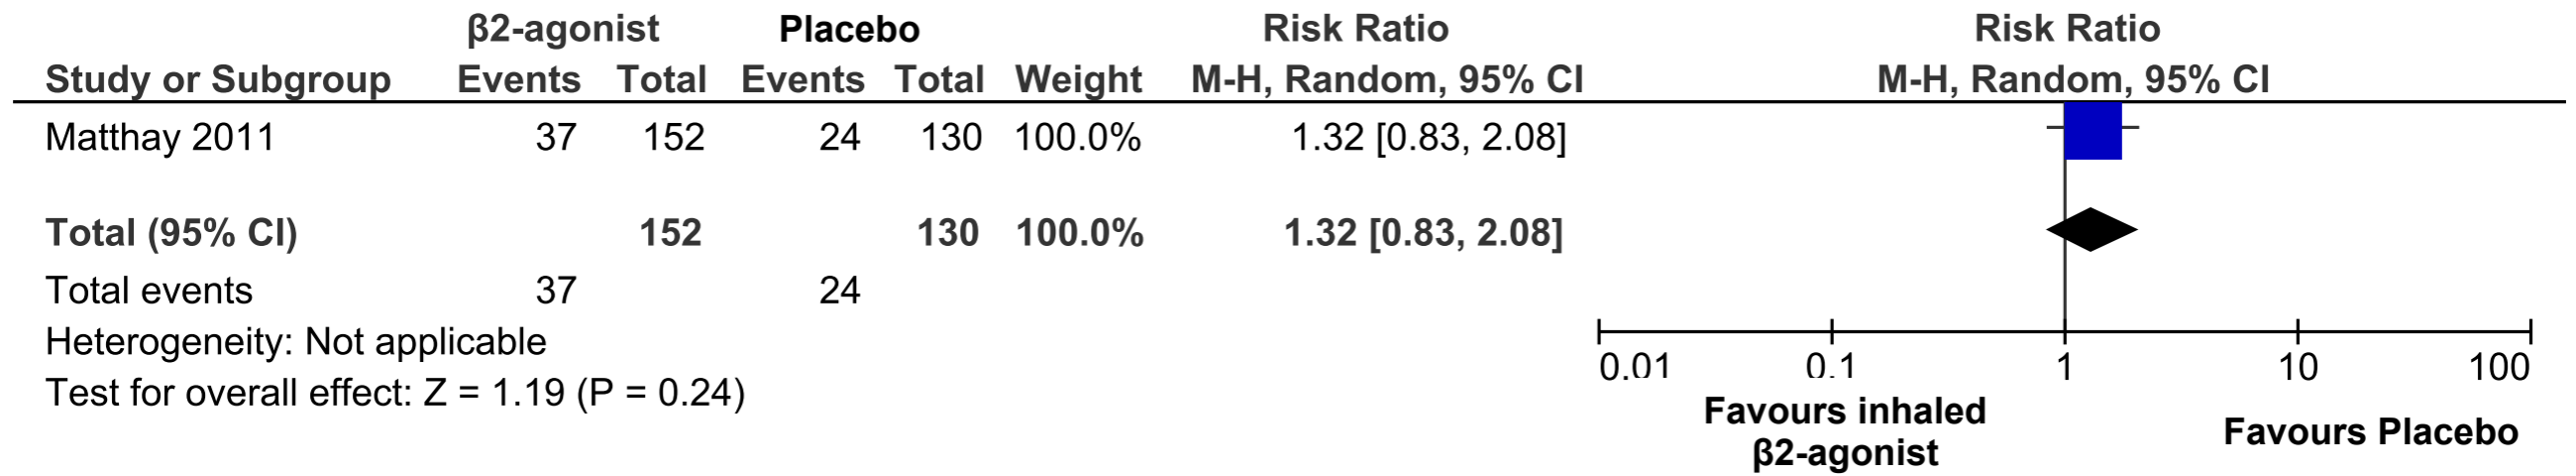

## Severe complication

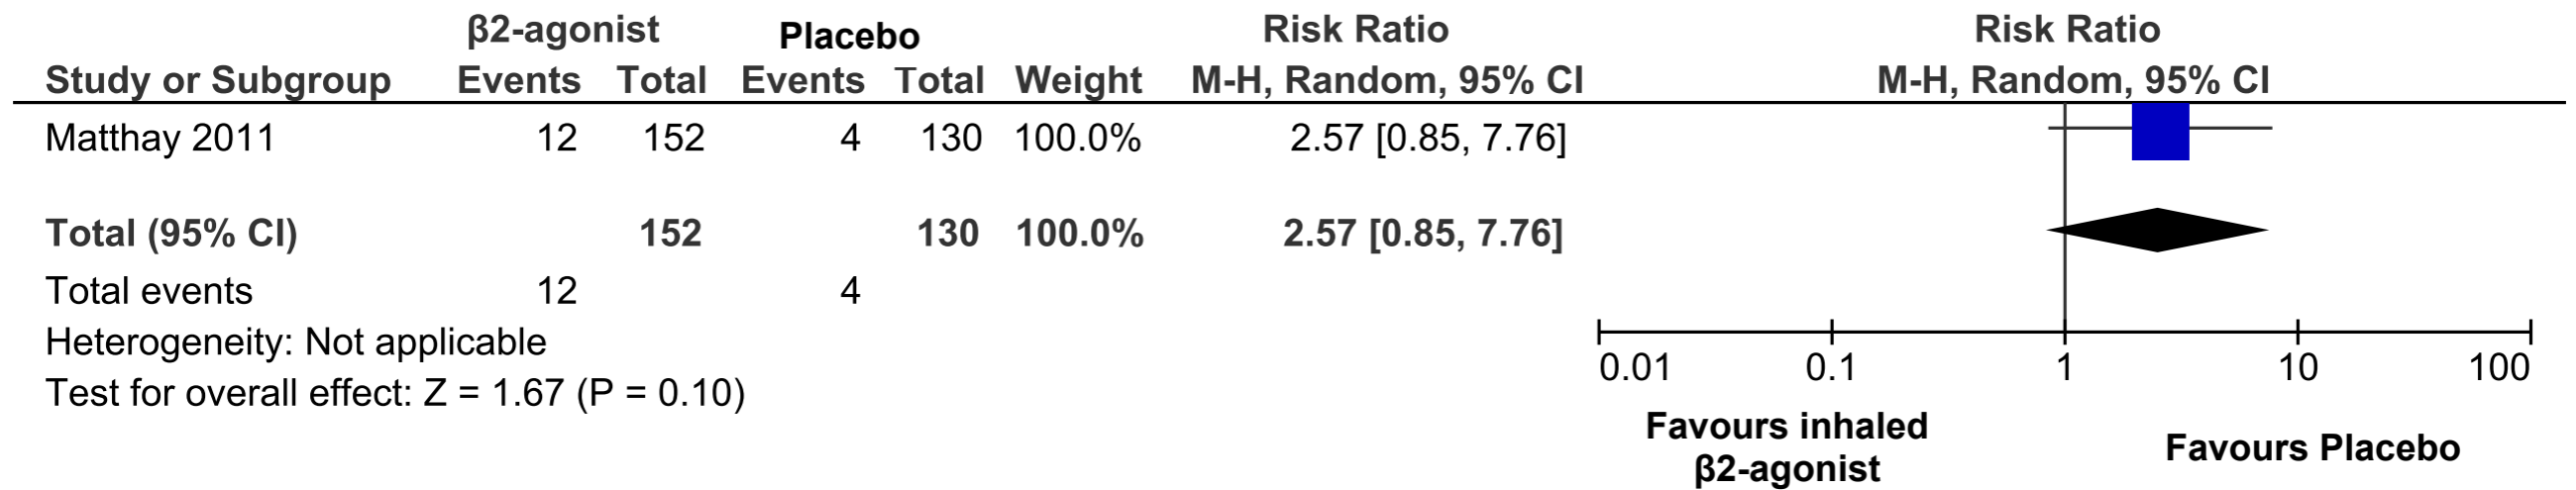

## Short term mortality

|              | Random sequence generation (selection bias) | Allocation concealment (selection bias) | Blinding of participants and personnel (performance bias) | Blinding of outcome assessment (detection bias) | Incomplete outcome data (attrition bias) | Selective reporting (reporting bias) | Other bias |
|--------------|---------------------------------------------|-----------------------------------------|-----------------------------------------------------------|-------------------------------------------------|------------------------------------------|--------------------------------------|------------|
| Gao 2012     | +                                           | +                                       | +                                                         | +                                               | +                                        | +                                    | +          |
| Perkins 2006 | ?                                           | ?                                       | +                                                         | +                                               | +                                        | ?                                    | ?          |

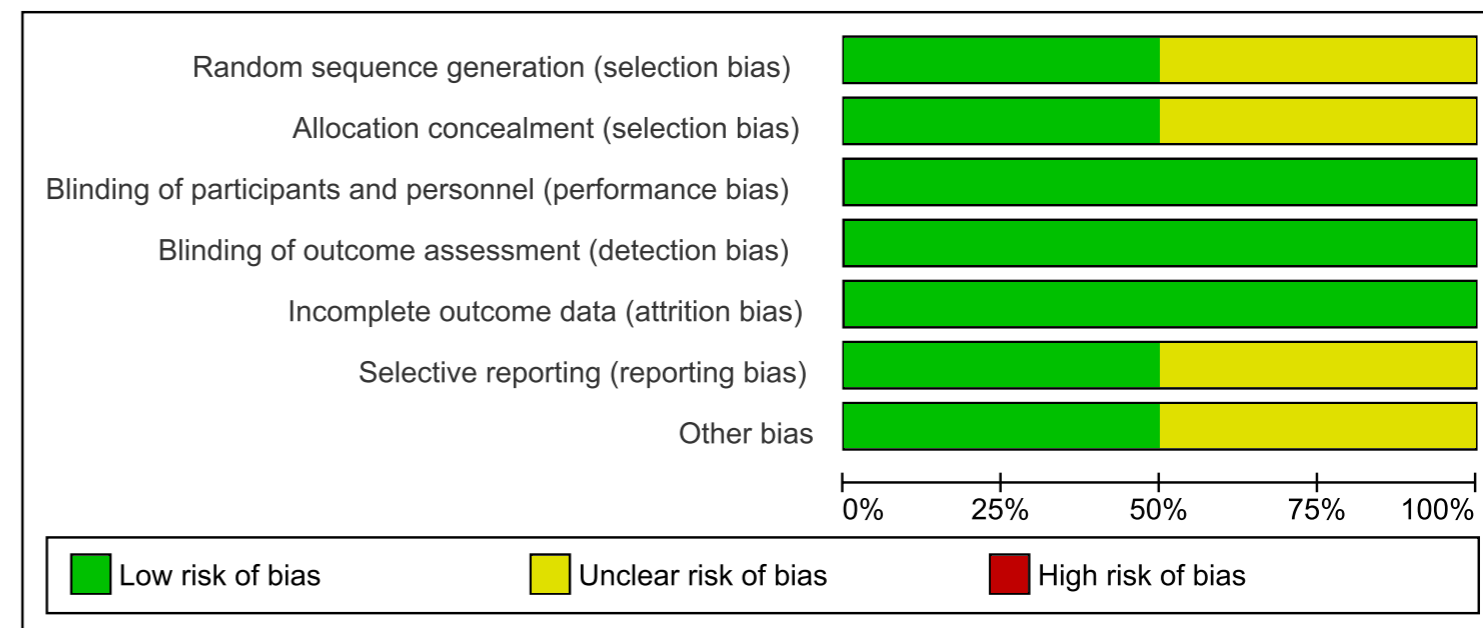

## Severe complication

|              | Random sequence generation (selection bias) | Allocation concealment (selection bias) | Blinding of participants and personnel (performance bias) | Blinding of outcome assessment (detection bias) | Incomplete outcome data (attrition bias) | Selective reporting (reporting bias) | Other bias |
|--------------|---------------------------------------------|-----------------------------------------|-----------------------------------------------------------|-------------------------------------------------|------------------------------------------|--------------------------------------|------------|
| Gao 2012     | +                                           | +                                       | +                                                         | +                                               | +                                        | +                                    | +          |
| Perkins 2006 | ?                                           | ?                                       | +                                                         | +                                               | +                                        | ?                                    | ?          |

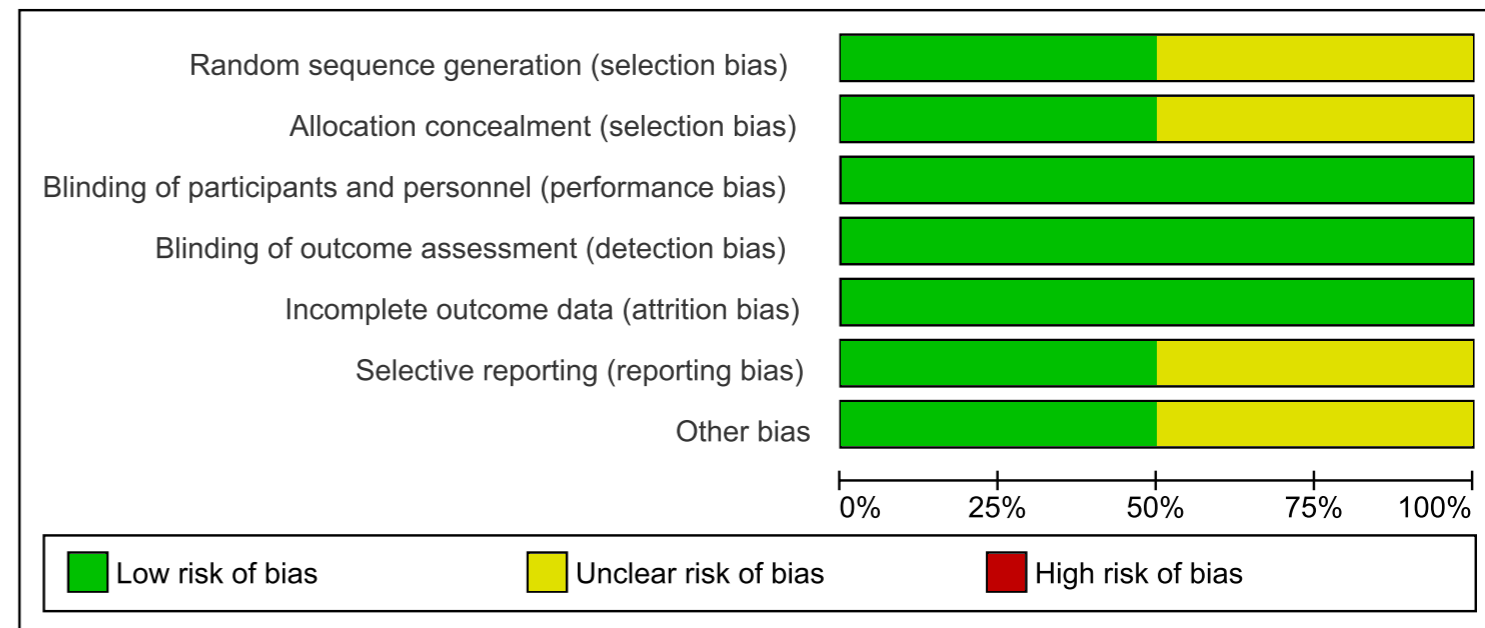

## Short term mortality

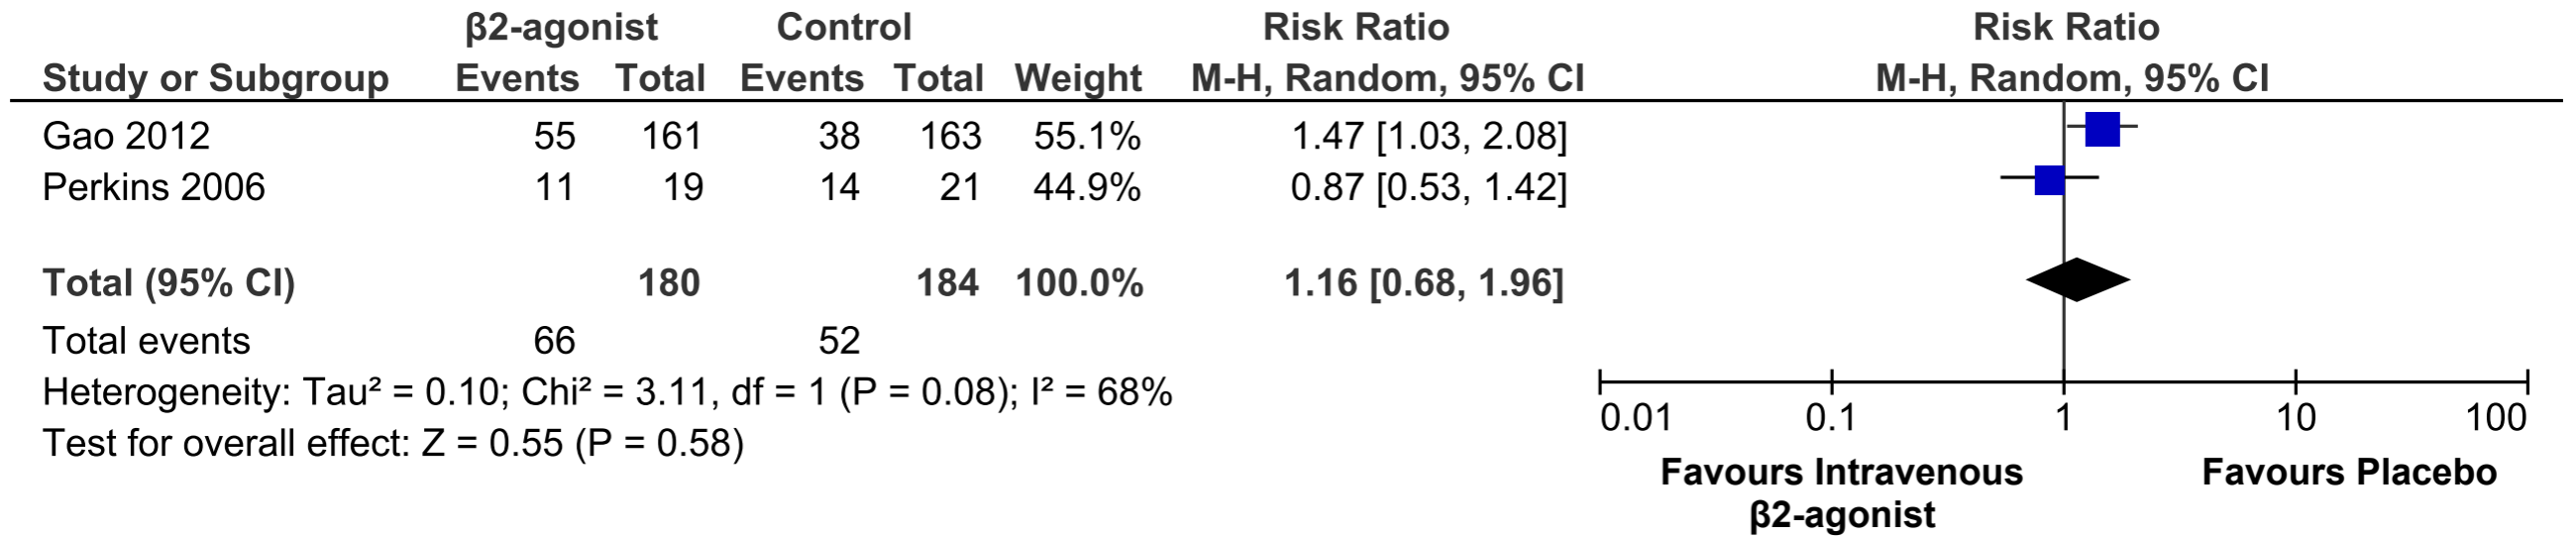

## Severe complication

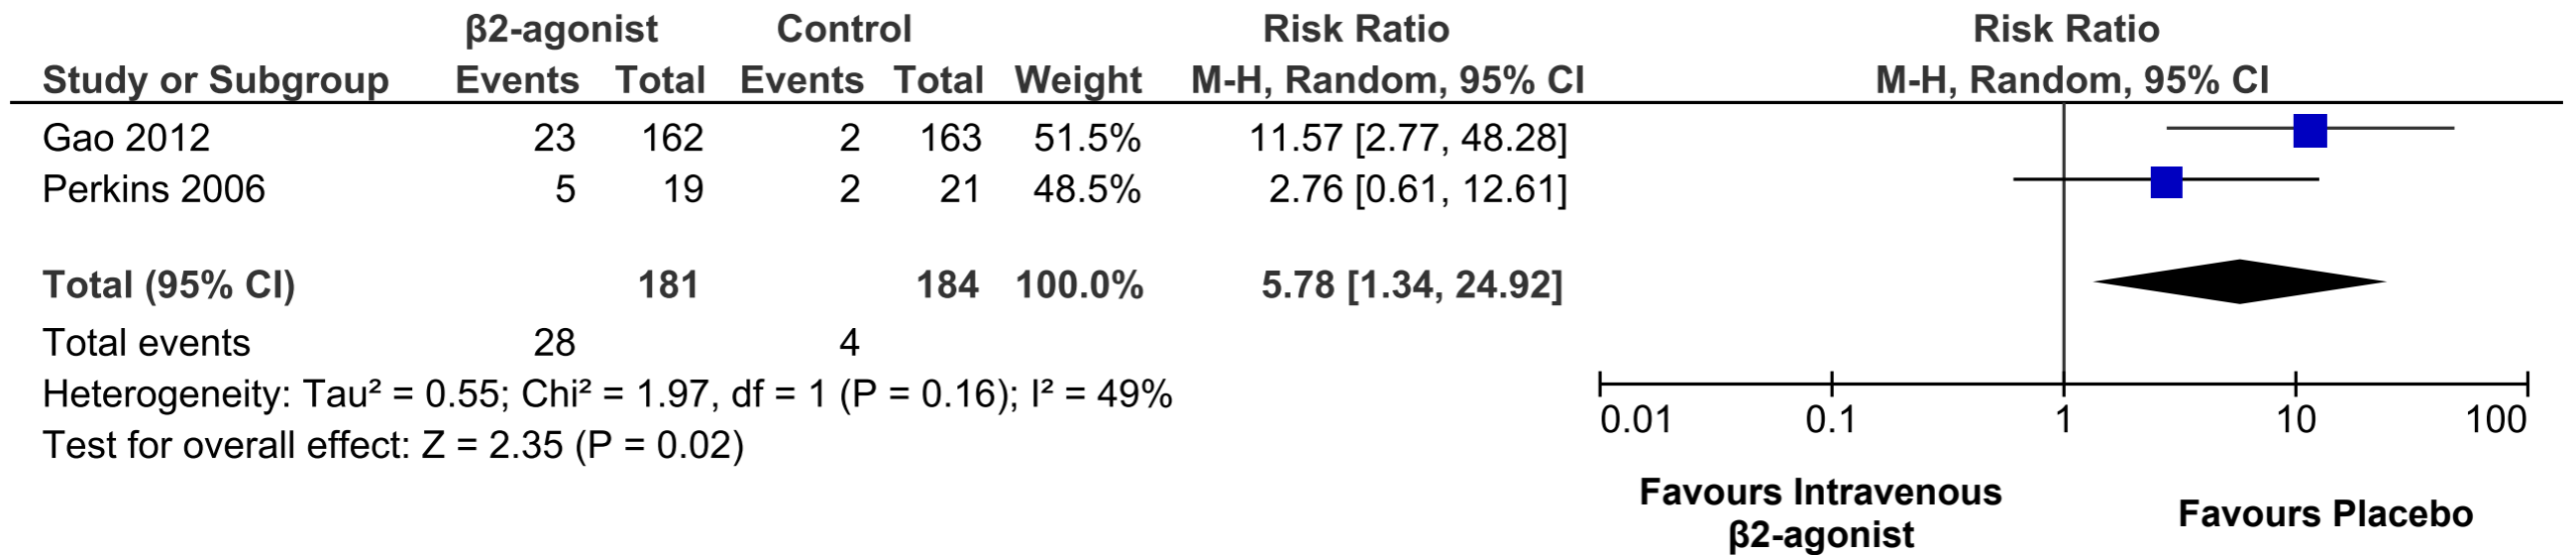

### Short term mortality

|                | Random sequence generation (selection bias) | Allocation concealment (selection bias) | Blinding of participants and personnel (performance bias) | Blinding of outcome assessment (detection bias) | Incomplete outcome data (attrition bias) | Selective reporting (reporting bias) | Other bias |
|----------------|---------------------------------------------|-----------------------------------------|-----------------------------------------------------------|-------------------------------------------------|------------------------------------------|--------------------------------------|------------|
| Paine 2012     | +                                           | +                                       | +                                                         | +                                               | +                                        | +                                    | -          |
| Presneill 2002 | ?                                           | ?                                       | +                                                         | +                                               | +                                        | ?                                    | ?          |

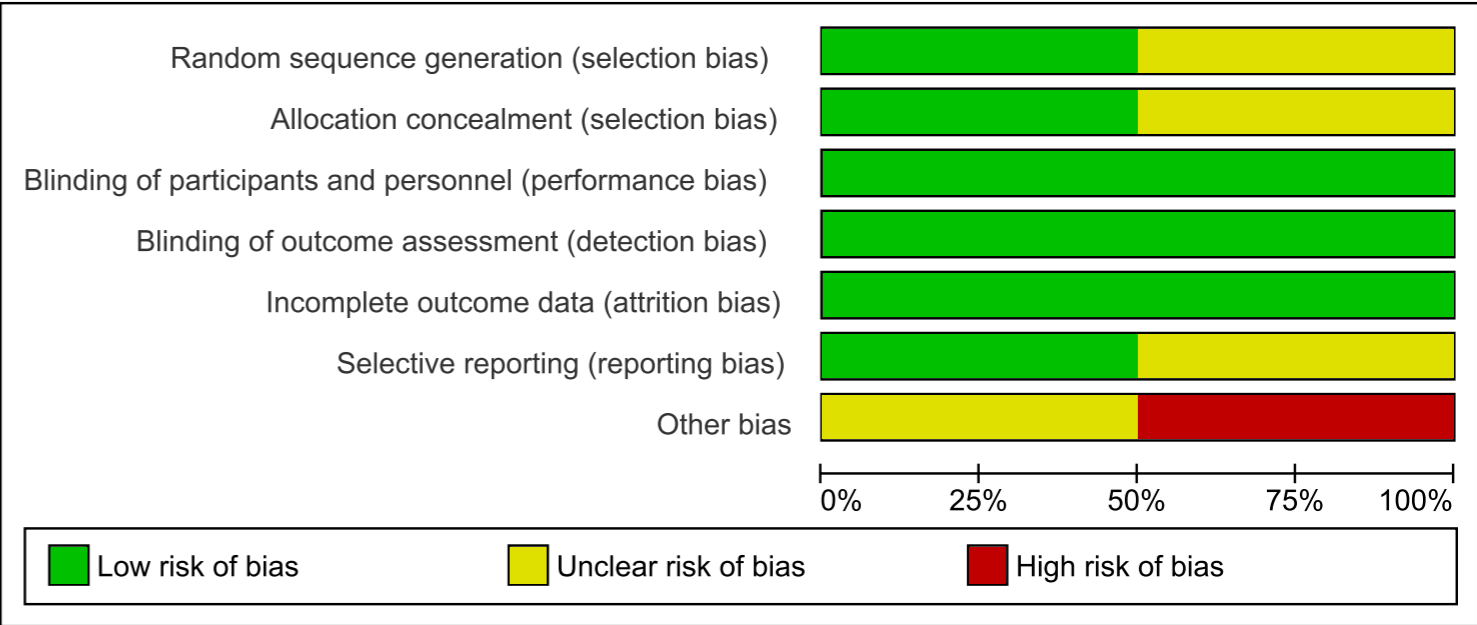

# Severe complication

Paine 2012

|   |                                                           |
|---|-----------------------------------------------------------|
| + | Random sequence generation (selection bias)               |
| + | Allocation concealment (selection bias)                   |
| + | Blinding of participants and personnel (performance bias) |
| + | Blinding of outcome assessment (detection bias)           |
| + | Incomplete outcome data (attrition bias)                  |
| + | Selective reporting (reporting bias)                      |
| - | Other bias                                                |

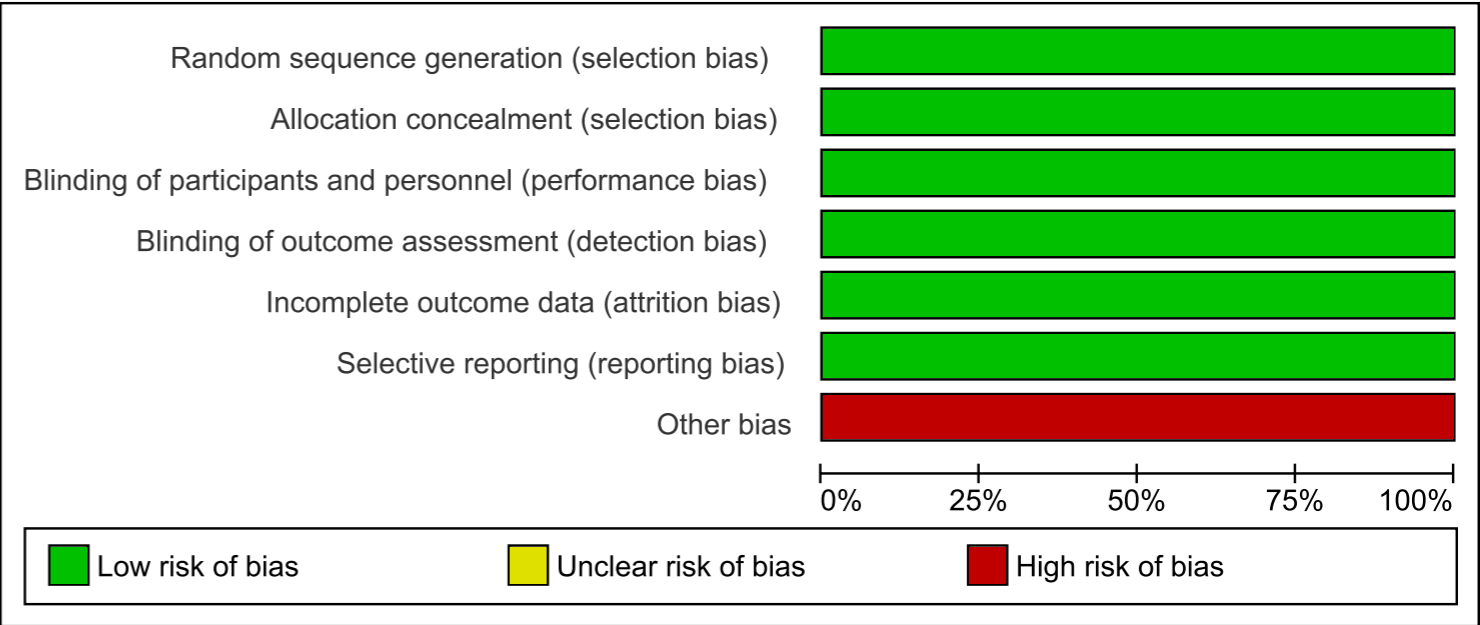

## Short term mortality

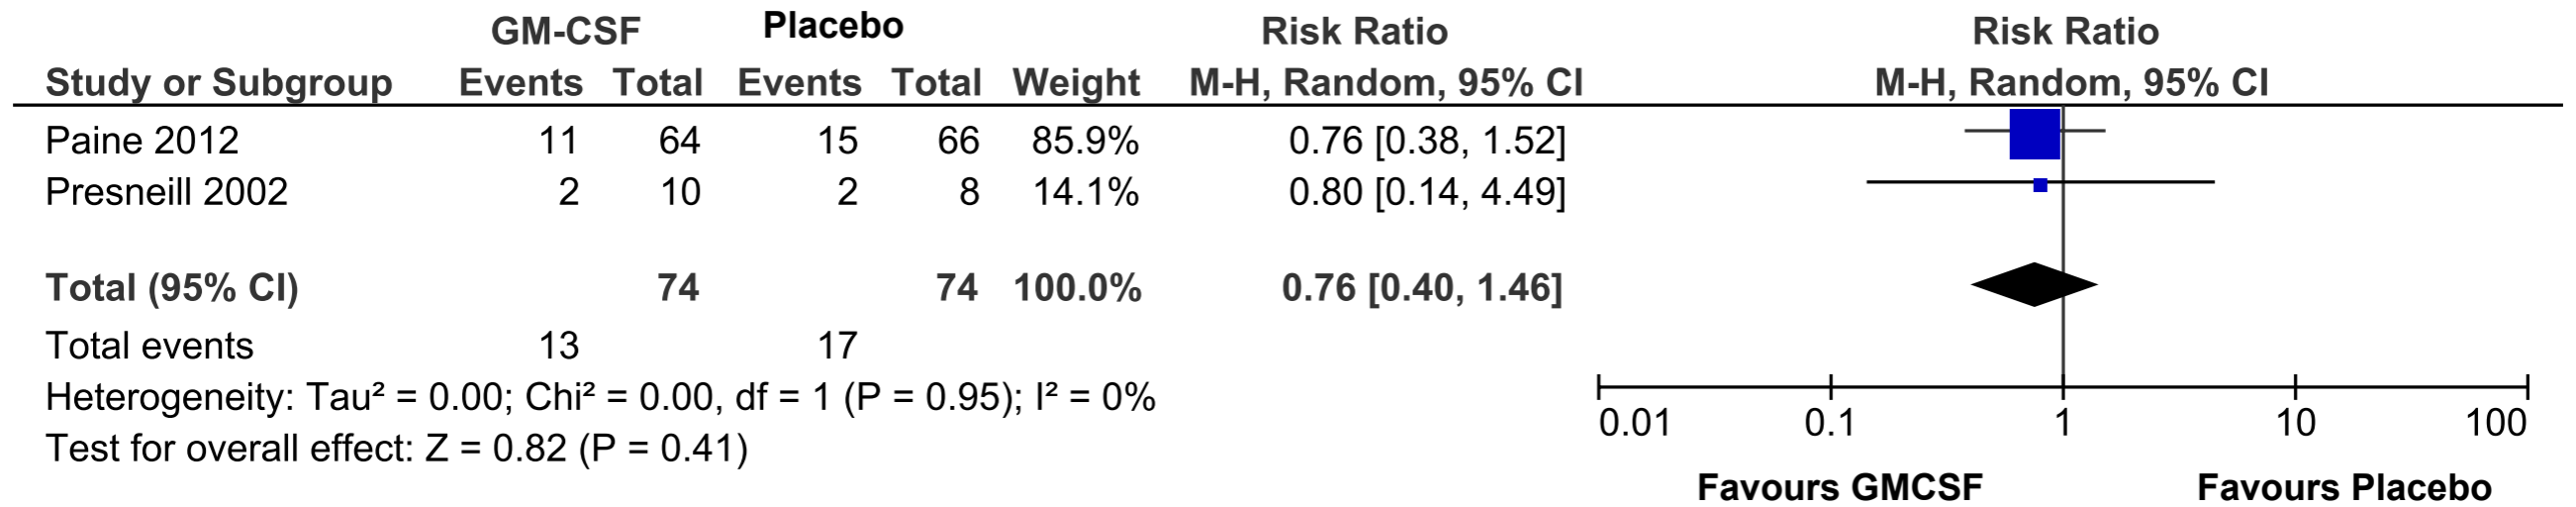

## Severe complication

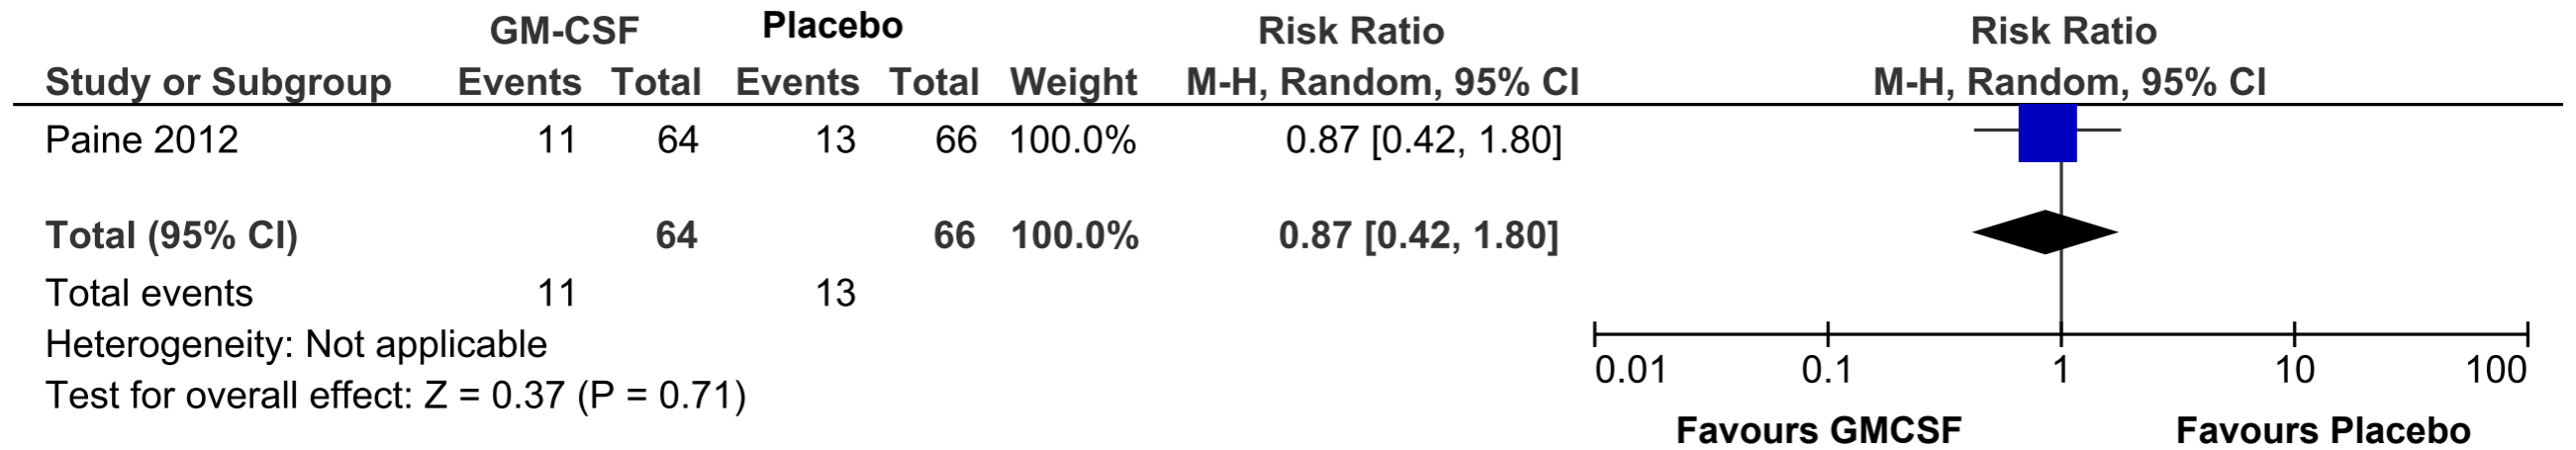

## Short term mortality

|                | Random sequence generation (selection bias) | Allocation concealment (selection bias) | Blinding of participants and personnel (performance bias) | Blinding of outcome assessment (detection bias) | Incomplete outcome data (attrition bias) | Selective reporting (reporting bias) | Other bias |
|----------------|---------------------------------------------|-----------------------------------------|-----------------------------------------------------------|-------------------------------------------------|------------------------------------------|--------------------------------------|------------|
| Abraham 1996   | ?                                           | ?                                       | +                                                         | +                                               | +                                        | ?                                    | ?          |
| Abraham 1999   | ?                                           | ?                                       | +                                                         | +                                               | +                                        | ?                                    | ?          |
| Bone 1989      | +                                           | +                                       | +                                                         | +                                               | +                                        | ?                                    | ?          |
| Holcroft 1986  | +                                           | +                                       | +                                                         | +                                               | +                                        | ?                                    | ?          |
| Rossignon 1990 | ?                                           | ?                                       | +                                                         | +                                               | +                                        | ?                                    | +          |
| Slotman 1992   | +                                           | +                                       | +                                                         | +                                               | +                                        | +                                    | +          |
| Vincent 2001   | ?                                           | ?                                       | +                                                         | +                                               | +                                        | ?                                    | +          |

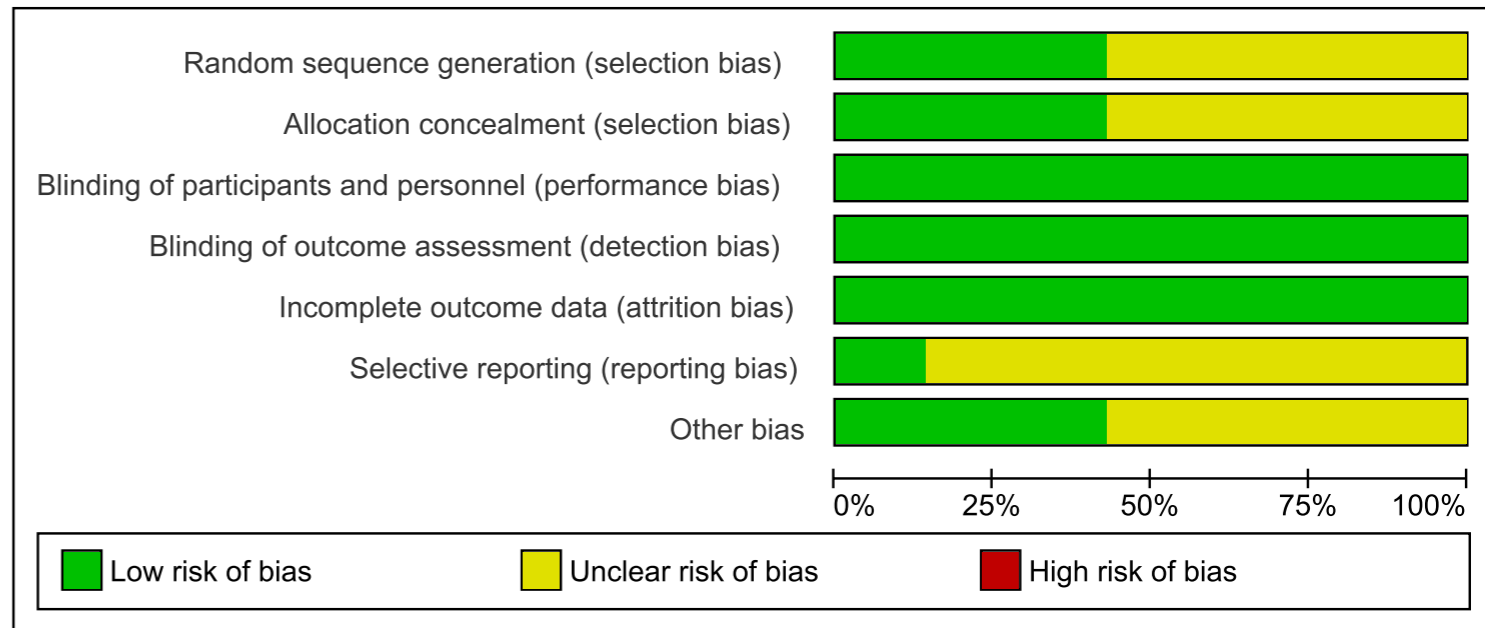



## Severe complication

|               | Random sequence generation (selection bias) | Allocation concealment (selection bias) | Blinding of participants and personnel (performance bias) | Blinding of outcome assessment (detection bias) | Incomplete outcome data (attrition bias) | Selective reporting (reporting bias) | Other bias |
|---------------|---------------------------------------------|-----------------------------------------|-----------------------------------------------------------|-------------------------------------------------|------------------------------------------|--------------------------------------|------------|
| Abraham 1996  | ?                                           | ?                                       | +                                                         | +                                               | +                                        | ?                                    | ?          |
| Abraham 1999  | ?                                           | ?                                       | +                                                         | +                                               | +                                        | ?                                    | ?          |
| Bone 1989     | +                                           | +                                       | +                                                         | +                                               | +                                        | ?                                    | ?          |
| Rosignon 1990 | ?                                           | ?                                       | +                                                         | +                                               | +                                        | ?                                    | +          |

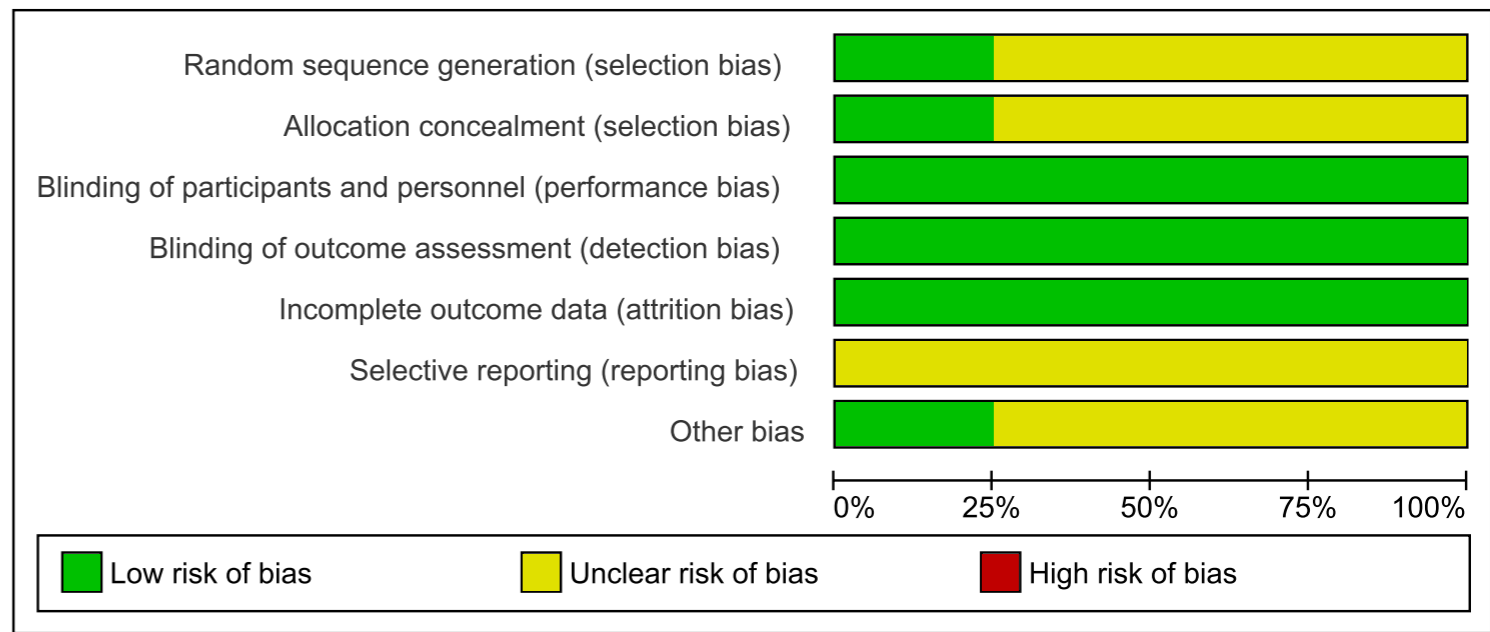

## Short term mortality

| Study or Subgroup     | PGE1   |            | Placebo |            | Weight        | Risk Ratio               |
|-----------------------|--------|------------|---------|------------|---------------|--------------------------|
|                       | Events | Total      | Events  | Total      |               | M-H, Random, 95% CI      |
| Abraham 1996          | 1      | 17         | 2       | 8          | 0.6%          | 0.24 [0.02, 2.23]        |
| Abraham 1999          | 55     | 178        | 48      | 172        | 26.9%         | 1.11 [0.80, 1.53]        |
| Bone 1989             | 30     | 50         | 24      | 50         | 21.6%         | 1.25 [0.87, 1.80]        |
| Holcroft 1986         | 9      | 20         | 13      | 20         | 9.0%          | 0.69 [0.39, 1.24]        |
| Rossignon 1990        | 4      | 11         | 7       | 12         | 3.7%          | 0.62 [0.25, 1.56]        |
| Slotman 1992          | 42     | 72         | 37      | 74         | 31.1%         | 1.17 [0.86, 1.57]        |
| Vincent 2001          | 21     | 70         | 9       | 32         | 7.1%          | 1.07 [0.55, 2.06]        |
| <b>Total (95% CI)</b> |        | <b>418</b> |         | <b>368</b> | <b>100.0%</b> | <b>1.07 [0.90, 1.28]</b> |

Total events

162

140

Heterogeneity:  $\text{Tau}^2 = 0.00$ ;  $\text{Chi}^2 = 6.29$ ,  $\text{df} = 6$  ( $P = 0.39$ );  $I^2 = 5\%$ Test for overall effect:  $Z = 0.76$  ( $P = 0.45$ )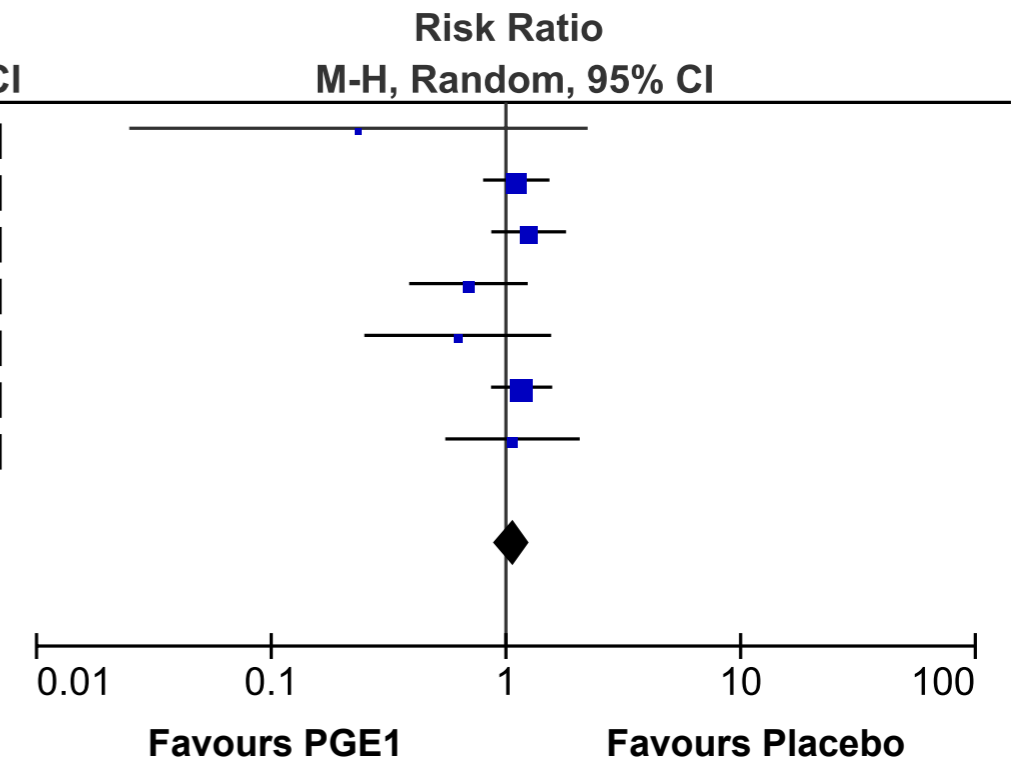

## Severe complication

| Study or Subgroup     | PGE1   |            | Placebo |            | Weight        | Risk Ratio               |
|-----------------------|--------|------------|---------|------------|---------------|--------------------------|
|                       | Events | Total      | Events  | Total      |               | M-H, Random, 95% CI      |
| Abraham 1996          | 7      | 17         | 3       | 8          | 21.3%         | 1.10 [0.38, 3.17]        |
| Abraham 1999          | 93     | 178        | 29      | 172        | 48.3%         | 3.10 [2.16, 4.44]        |
| Bone 1989             | 10     | 50         | 7       | 50         | 26.4%         | 1.43 [0.59, 3.45]        |
| Rossignon 1990        | 2      | 11         | 0       | 12         | 4.1%          | 5.42 [0.29, 101.77]      |
| <b>Total (95% CI)</b> |        | <b>256</b> |         | <b>242</b> | <b>100.0%</b> | <b>2.07 [1.12, 3.83]</b> |

Total events

112

39

Heterogeneity:  $\text{Tau}^2 = 0.17$ ;  $\text{Chi}^2 = 5.48$ ,  $\text{df} = 3$  ( $P = 0.14$ );  $I^2 = 45\%$ Test for overall effect:  $Z = 2.33$  ( $P = 0.02$ )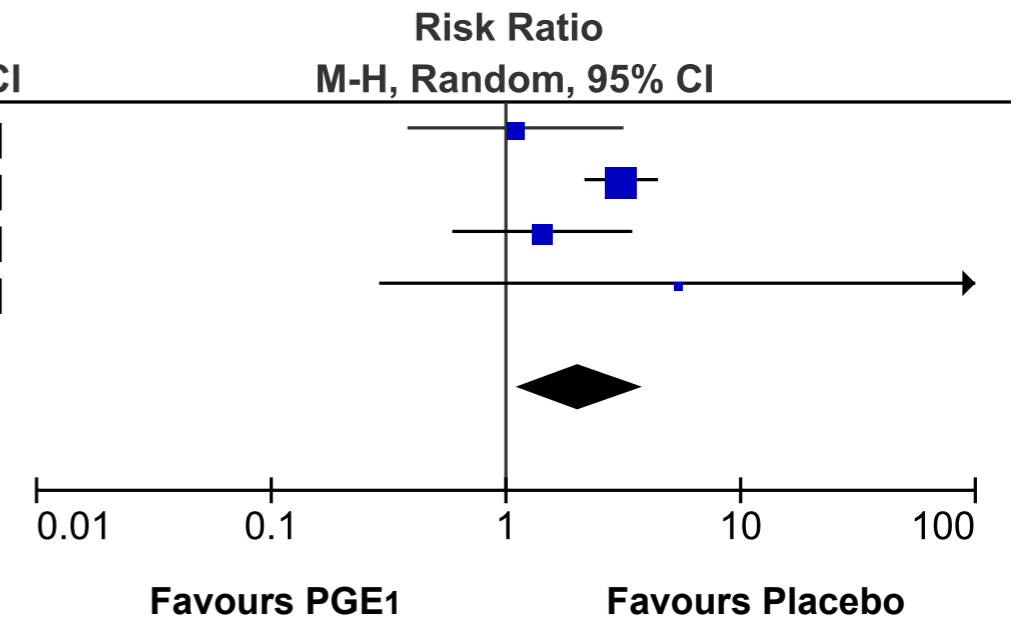

## Short term mortality

|              | Random sequence generation (selection bias) | Allocation concealment (selection bias) | Blinding of participants and personnel (performance bias) | Blinding of outcome assessment (detection bias) | Incomplete outcome data (attrition bias) | Selective reporting (reporting bias) | Other bias |
|--------------|---------------------------------------------|-----------------------------------------|-----------------------------------------------------------|-------------------------------------------------|------------------------------------------|--------------------------------------|------------|
| McAuley 2014 | +                                           | +                                       | +                                                         | +                                               | +                                        | +                                    | +          |
| Truwit 2014  | +                                           | ?                                       | +                                                         | +                                               | +                                        | +                                    | +          |

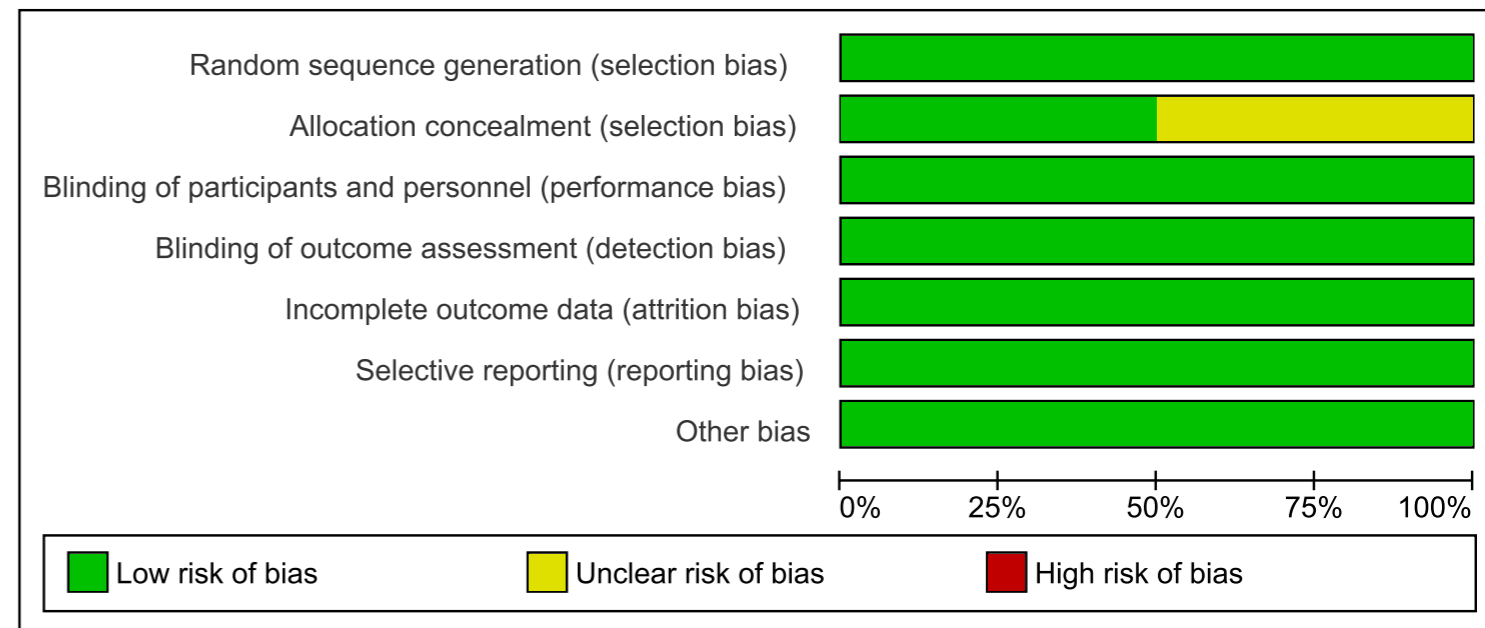

## Severe complication

|              | Random sequence generation (selection bias) | Allocation concealment (selection bias) | Blinding of participants and personnel (performance bias) | Blinding of outcome assessment (detection bias) | Incomplete outcome data (attrition bias) | Selective reporting (reporting bias) | Other bias |
|--------------|---------------------------------------------|-----------------------------------------|-----------------------------------------------------------|-------------------------------------------------|------------------------------------------|--------------------------------------|------------|
| Craig 2011   | +                                           | +                                       | +                                                         | +                                               | +                                        | +                                    | +          |
| McAuley 2014 | +                                           | +                                       | +                                                         | +                                               | +                                        | +                                    | +          |

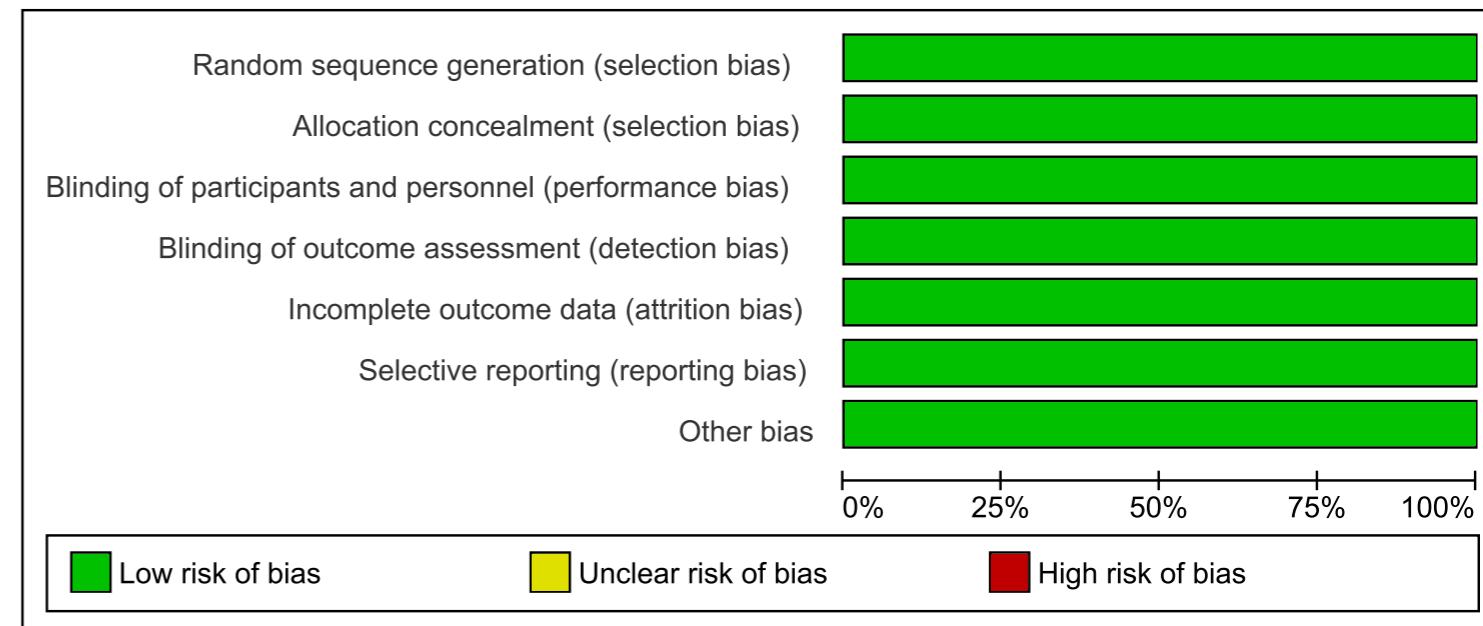

## Short term mortality

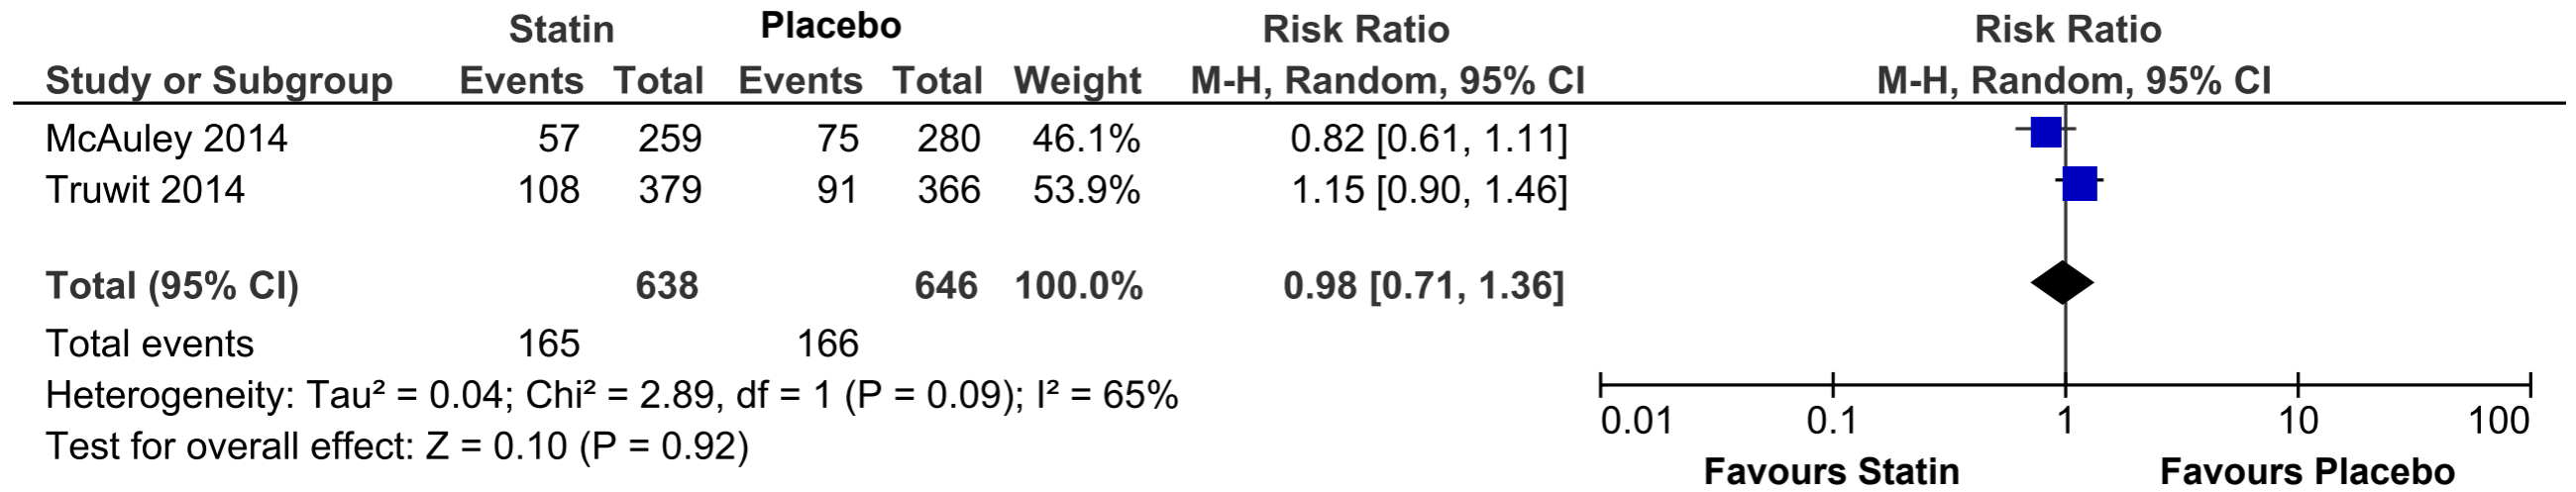

## Severe complication

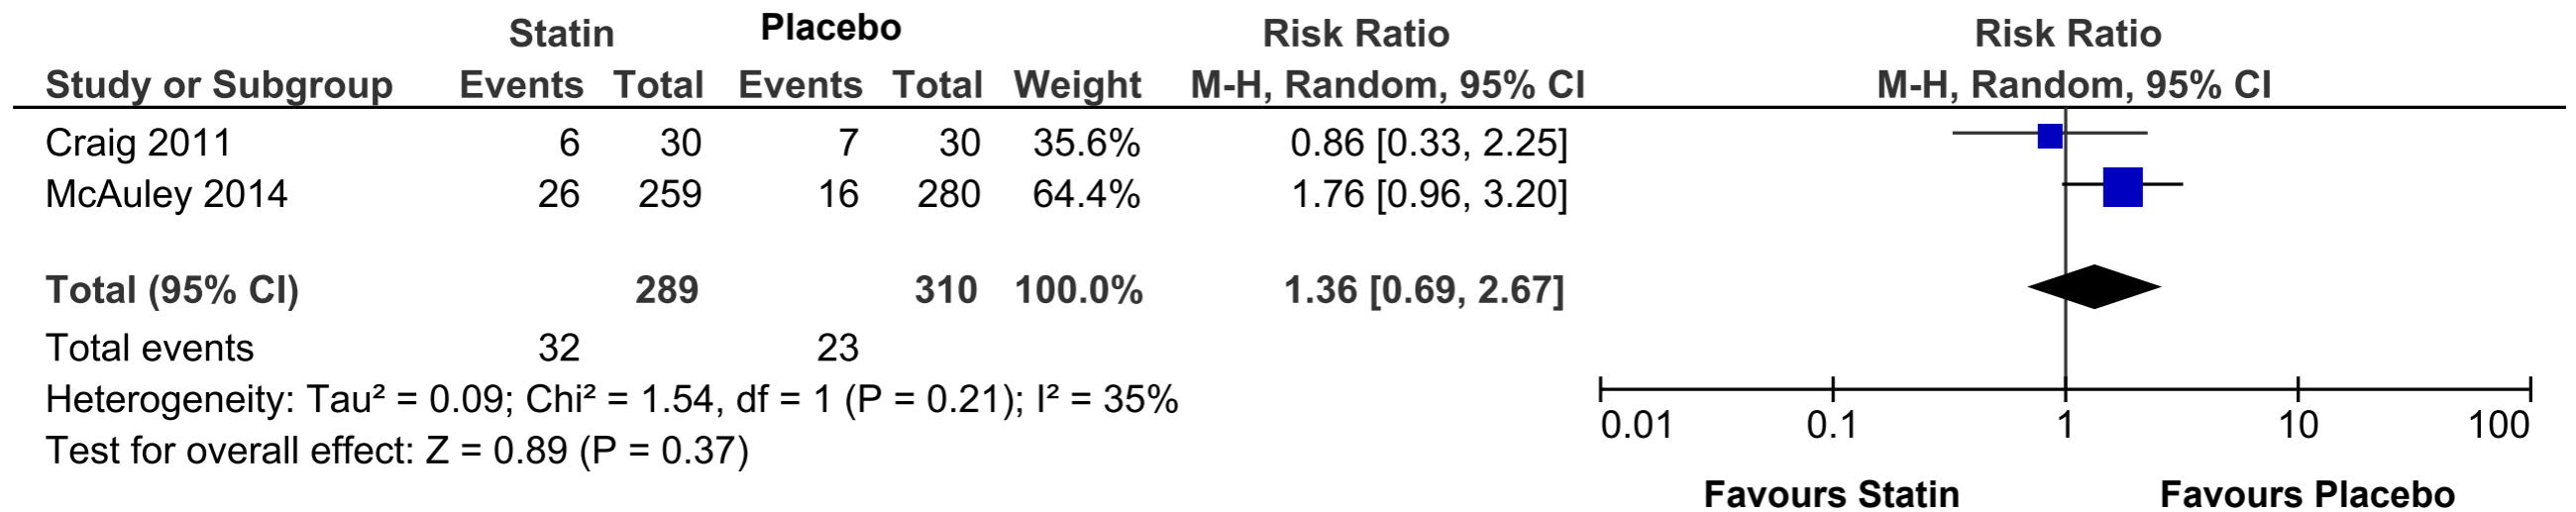

# Short term mortality

|                 | Random sequence generation (selection bias) | Allocation concealment (selection bias) | Blinding of participants and personnel (performance bias) | Blinding of outcome assessment (detection bias) | Incomplete outcome data (attrition bias) | Selective reporting (reporting bias) | Other bias |
|-----------------|---------------------------------------------|-----------------------------------------|-----------------------------------------------------------|-------------------------------------------------|------------------------------------------|--------------------------------------|------------|
| Anzueto 1996    | +                                           | +                                       | +                                                         | +                                               | +                                        | ?                                    | +          |
| Gregory 1997    | ?                                           | ?                                       | -                                                         | -                                               | +                                        | ?                                    | +          |
| Kesecioglu 2009 | +                                           | +                                       | -                                                         | -                                               | +                                        | ?                                    | +          |
| Markart 2007    | ?                                           | ?                                       | -                                                         | -                                               | +                                        | +                                    | +          |
| Spragg 2003     | ?                                           | ?                                       | -                                                         | -                                               | +                                        | ?                                    | ?          |
| Spragg 2004     | ?                                           | ?                                       | +                                                         | +                                               | +                                        | +                                    | +          |
| Spragg 2011     | +                                           | +                                       | +                                                         | +                                               | +                                        | +                                    | +          |
| Weg 1994        | ?                                           | ?                                       | +                                                         | ?                                               | +                                        | ?                                    | ?          |
| Willson 2015    | +                                           | ?                                       | +                                                         | +                                               | +                                        | +                                    | -          |

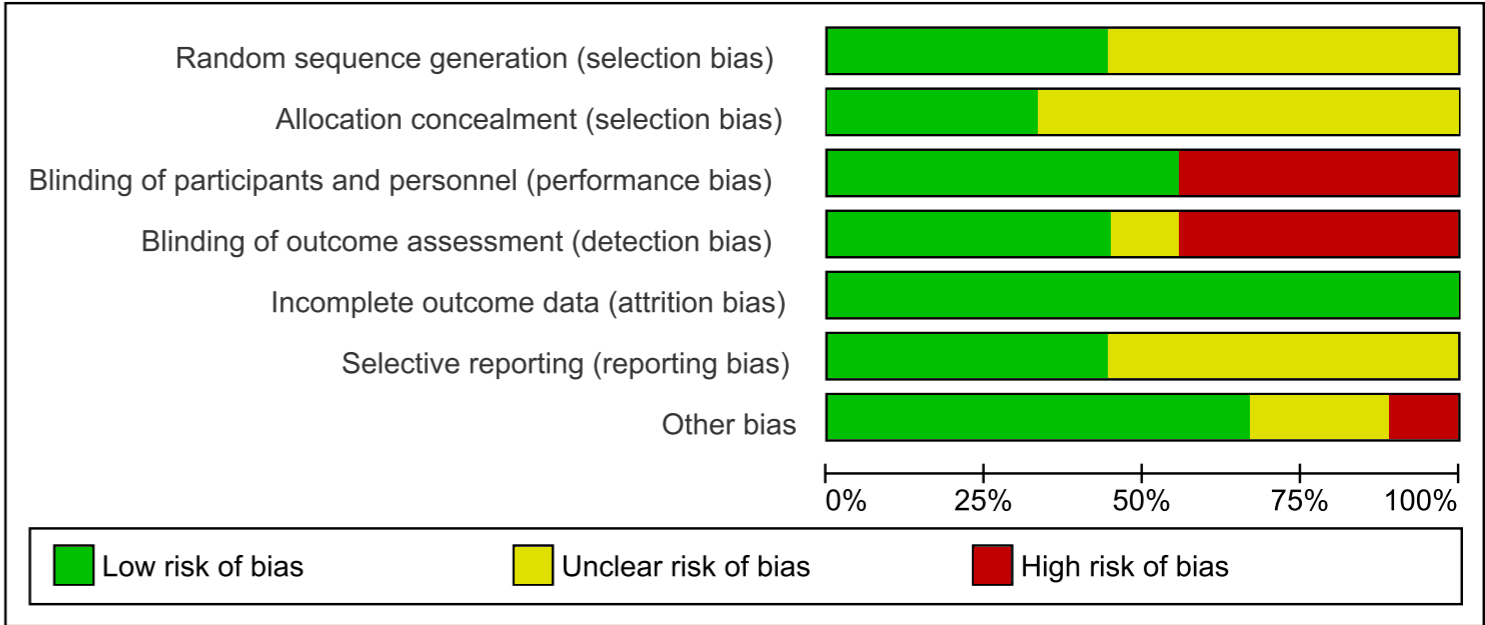

## Severe complication

|                 | Random sequence generation (selection bias) | Allocation concealment (selection bias) | Blinding of participants and personnel (performance bias) | Blinding of outcome assessment (detection bias) | Incomplete outcome data (attrition bias) | Selective reporting (reporting bias) | Other bias |
|-----------------|---------------------------------------------|-----------------------------------------|-----------------------------------------------------------|-------------------------------------------------|------------------------------------------|--------------------------------------|------------|
| Anzueto 1996    | +                                           | +                                       | +                                                         | +                                               | +                                        | ?                                    | +          |
| Gregory 1997    | ?                                           | ?                                       | -                                                         | -                                               | +                                        | ?                                    | +          |
| Kesecioglu 2009 | +                                           | +                                       | -                                                         | -                                               | +                                        | ?                                    | +          |
| Spragg 2004     | ?                                           | ?                                       | +                                                         | +                                               | +                                        | +                                    | +          |
| Spragg 2011     | +                                           | +                                       | +                                                         | +                                               | +                                        | +                                    | +          |
| Willson 2015    | +                                           | ?                                       | +                                                         | +                                               | +                                        | +                                    | -          |

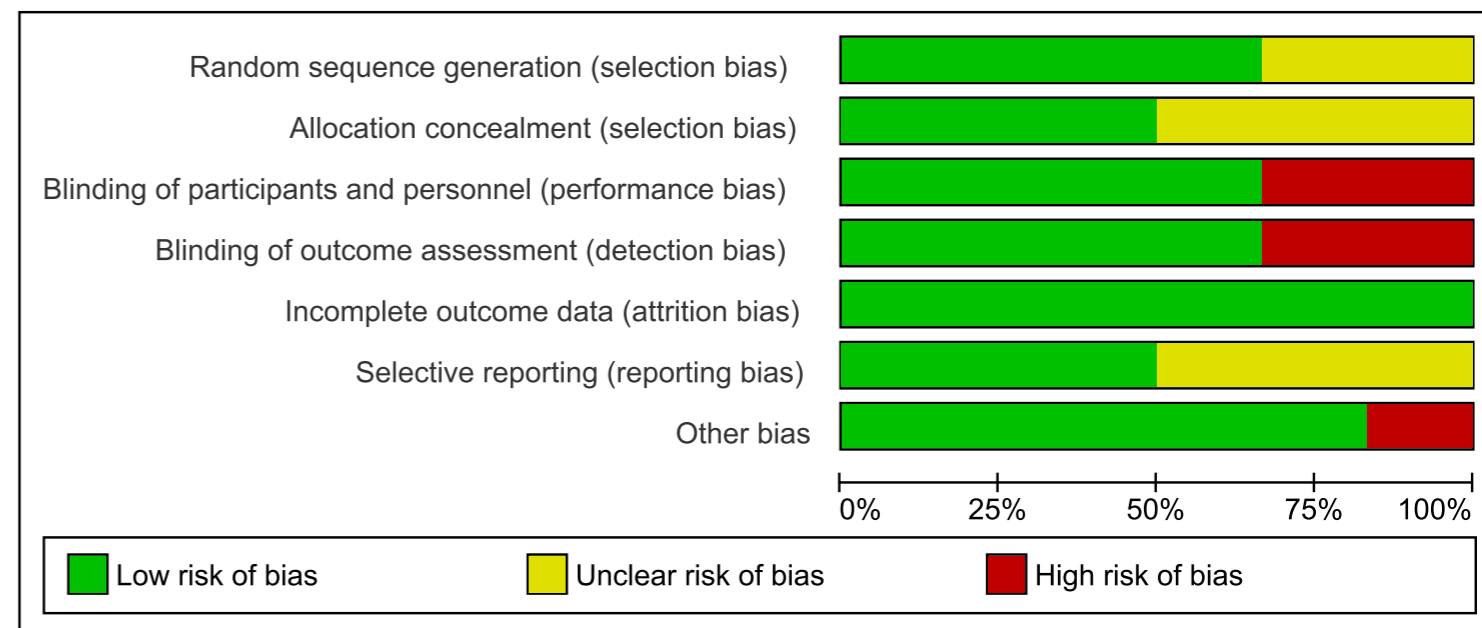

### Short term mortality

| Study or Subgroup     | Surfactant |             | Placebo |             | Weight        | Risk Ratio               |
|-----------------------|------------|-------------|---------|-------------|---------------|--------------------------|
|                       | Events     | Total       | Events  | Total       |               | M-H, Random, 95% CI      |
| Anzueto 1996          | 146        | 364         | 144     | 361         | 36.3%         | 1.01 [0.84, 1.20]        |
| Gregory 1997          | 10         | 43          | 7       | 16          | 1.9%          | 0.53 [0.24, 1.16]        |
| Kesecioglu 2009       | 60         | 208         | 51      | 210         | 11.2%         | 1.19 [0.86, 1.64]        |
| Markart 2007          | 10         | 14          | 13      | 17          | 6.4%          | 0.93 [0.61, 1.43]        |
| Spragg 2003           | 3          | 15          | 5       | 13          | 0.8%          | 0.52 [0.15, 1.77]        |
| Spragg 2004           | 64         | 224         | 68      | 224         | 14.0%         | 0.94 [0.71, 1.25]        |
| Spragg 2011           | 95         | 419         | 101     | 424         | 19.1%         | 0.95 [0.74, 1.22]        |
| Weg 1994              | 6          | 17          | 8       | 17          | 1.7%          | 0.75 [0.33, 1.70]        |
| Willson 2015          | 42         | 151         | 41      | 157         | 8.5%          | 1.07 [0.74, 1.54]        |
| <b>Total (95% CI)</b> |            | <b>1455</b> |         | <b>1439</b> | <b>100.0%</b> | <b>0.98 [0.88, 1.09]</b> |

Total events 436 438  
 Heterogeneity: Tau<sup>2</sup> = 0.00; Chi<sup>2</sup> = 5.67, df = 8 (P = 0.68); I<sup>2</sup> = 0%  
 Test for overall effect: Z = 0.32 (P = 0.75)

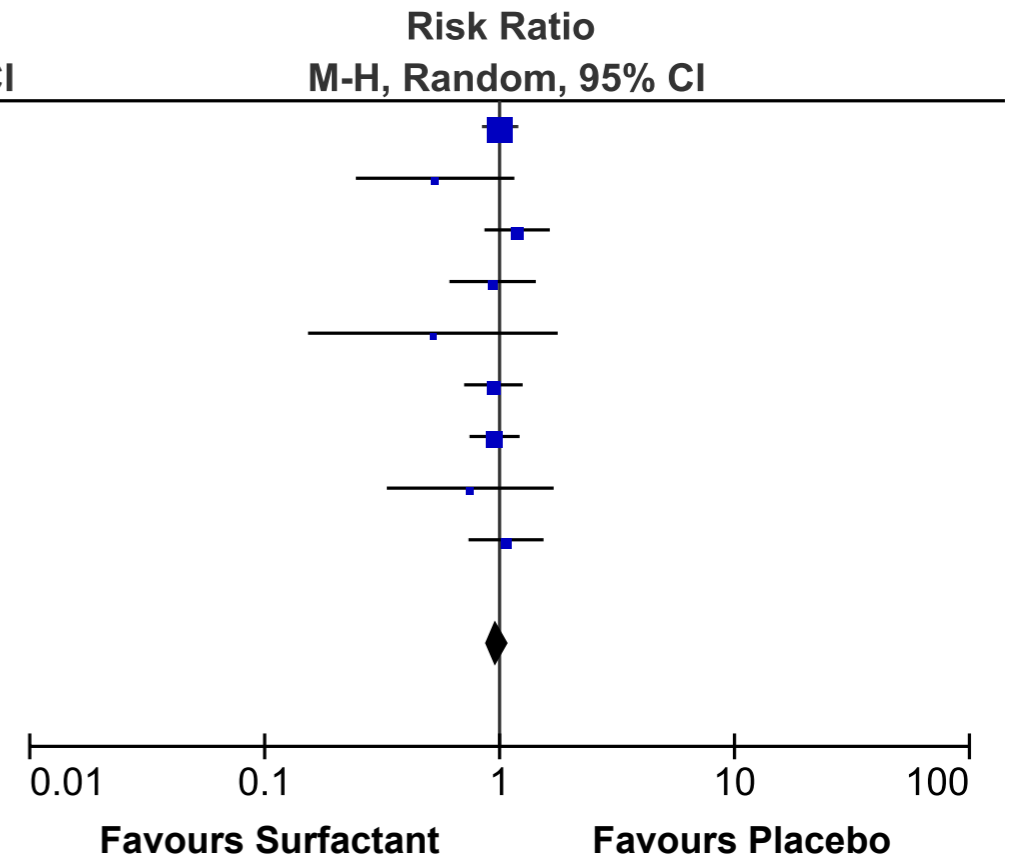

### Severe complication

| Study or Subgroup     | Surfactant |             | Placebo |             | Weight        | Risk Ratio               |
|-----------------------|------------|-------------|---------|-------------|---------------|--------------------------|
|                       | Events     | Total       | Events  | Total       |               | M-H, Random, 95% CI      |
| Anzueto 1996          | 5          | 364         | 3       | 361         | 5.9%          | 1.65 [0.40, 6.87]        |
| Gregory 1997          | 7          | 43          | 0       | 16          | 1.7%          | 5.80 [0.35, 96.02]       |
| Kesecioglu 2009       | 157        | 208         | 116     | 210         | 40.0%         | 1.37 [1.18, 1.58]        |
| Spragg 2004           | 10         | 224         | 4       | 224         | 8.5%          | 2.50 [0.80, 7.85]        |
| Spragg 2011           | 139        | 419         | 146     | 424         | 38.3%         | 0.96 [0.80, 1.16]        |
| Willson 2015          | 15         | 151         | 2       | 157         | 5.6%          | 7.80 [1.81, 33.52]       |
| <b>Total (95% CI)</b> |            | <b>1409</b> |         | <b>1392</b> | <b>100.0%</b> | <b>1.44 [0.99, 2.09]</b> |

Total events 333 271  
 Heterogeneity: Tau<sup>2</sup> = 0.08; Chi<sup>2</sup> = 17.43, df = 5 (P = 0.004); I<sup>2</sup> = 71%  
 Test for overall effect: Z = 1.91 (P = 0.06)

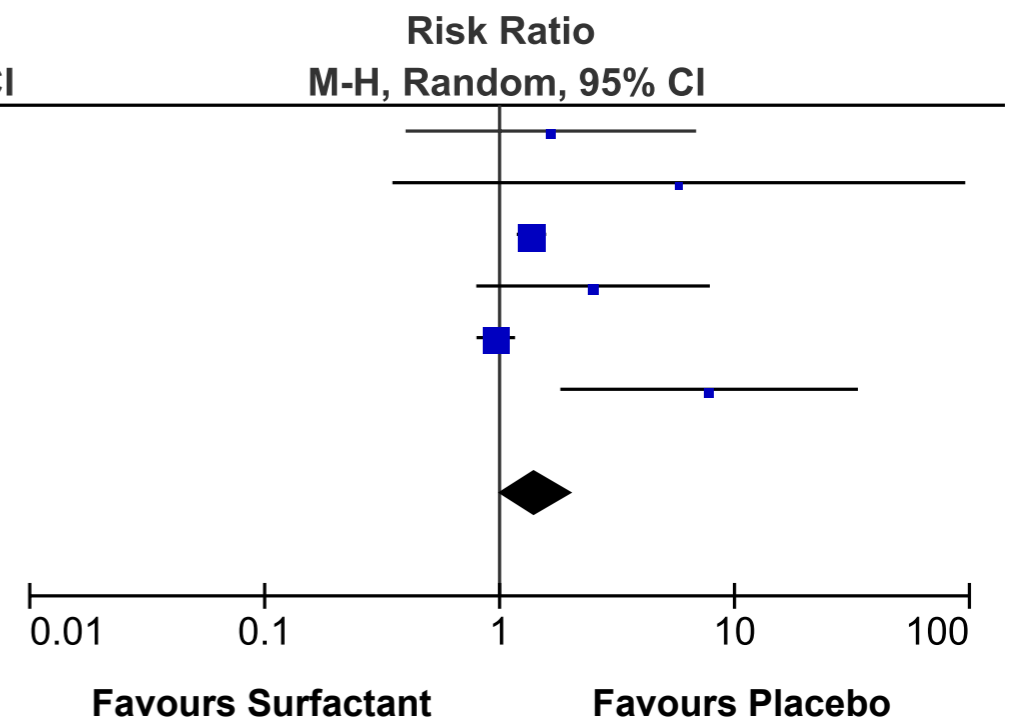



## Short term mortality

|             | Random sequence generation (selection bias) | Allocation concealment (selection bias) | Blinding of participants and personnel (performance bias) | Blinding of outcome assessment (detection bias) | Incomplete outcome data (attrition bias) | Selective reporting (reporting bias) | Other bias |
|-------------|---------------------------------------------|-----------------------------------------|-----------------------------------------------------------|-------------------------------------------------|------------------------------------------|--------------------------------------|------------|
| Cornet 2014 | +                                           | -                                       | -                                                         | +                                               | +                                        | +                                    | +          |
| Liu 2008    | ?                                           | +                                       | +                                                         | +                                               | +                                        | +                                    | +          |

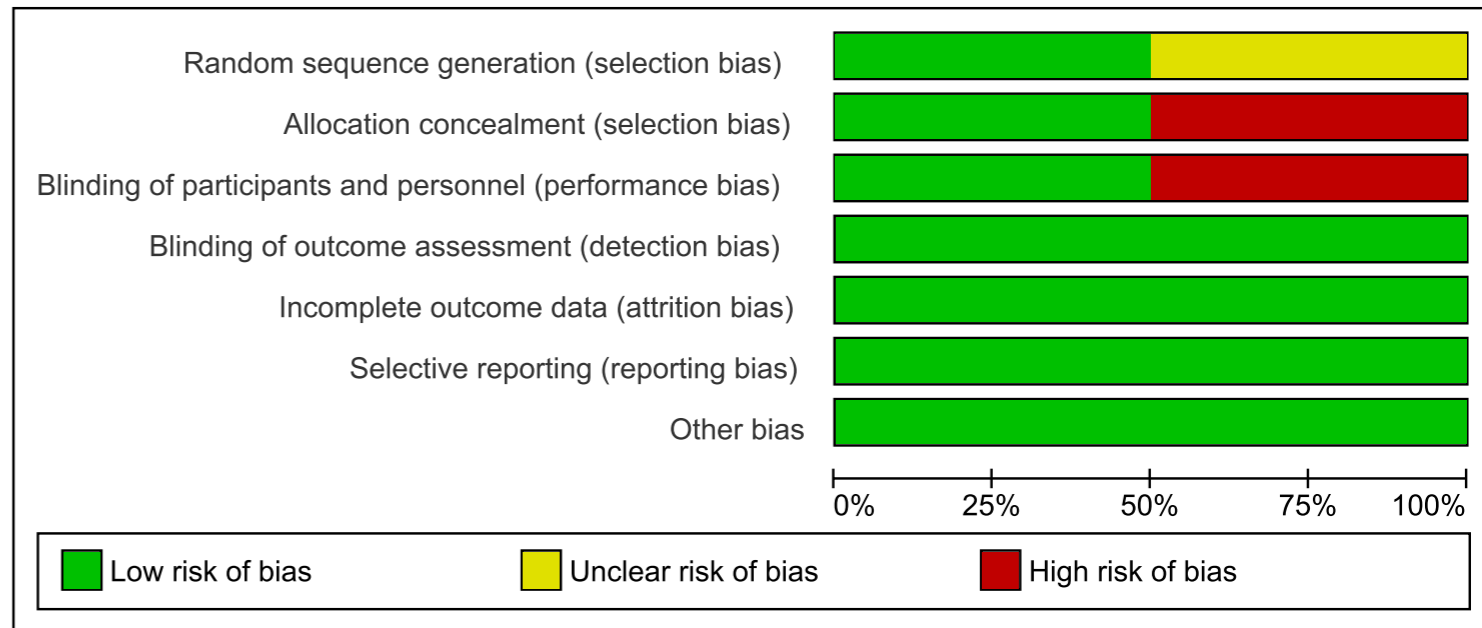

## Severe complication

|             | Random sequence generation (selection bias) | Allocation concealment (selection bias) | Blinding of participants and personnel (performance bias) | Blinding of outcome assessment (detection bias) | Incomplete outcome data (attrition bias) | Selective reporting (reporting bias) | Other bias |
|-------------|---------------------------------------------|-----------------------------------------|-----------------------------------------------------------|-------------------------------------------------|------------------------------------------|--------------------------------------|------------|
| Cornet 2014 | +                                           | -                                       | -                                                         | -                                               | +                                        | +                                    | +          |
| Liu 2008    | ?                                           | +                                       | +                                                         | +                                               | +                                        | +                                    | +          |

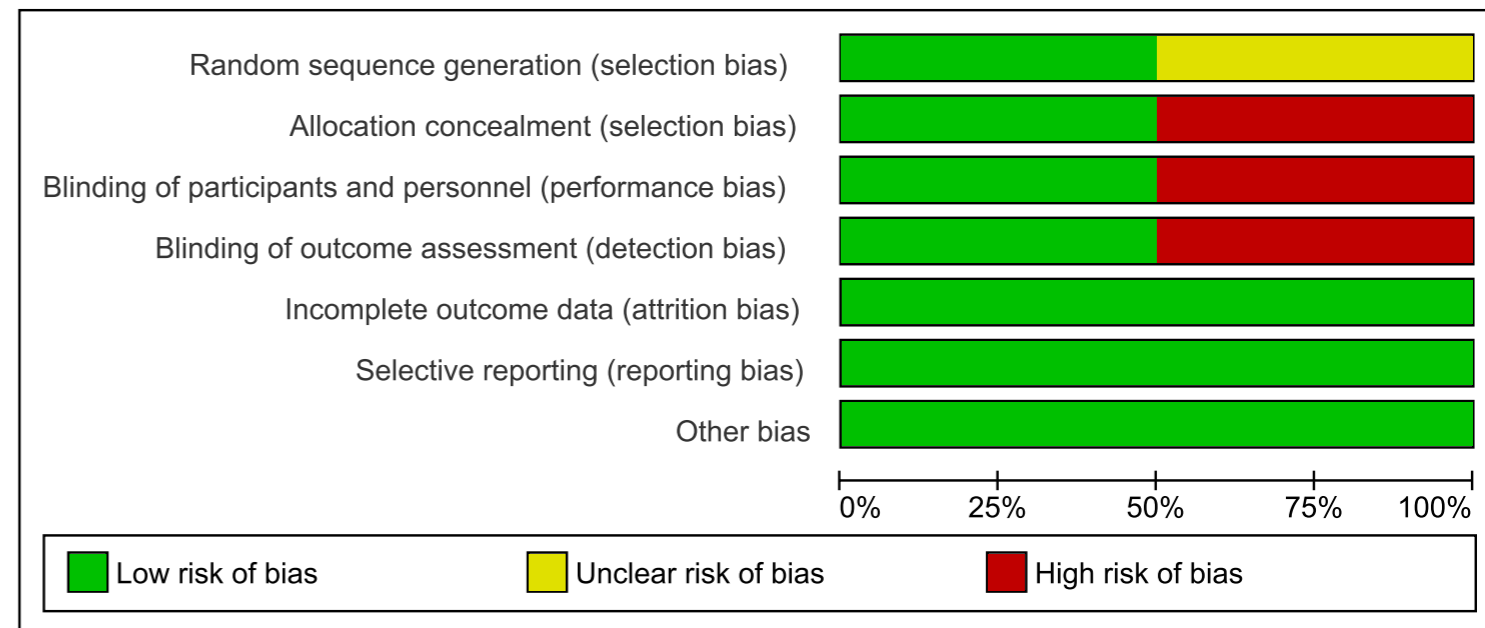

## Short term mortality

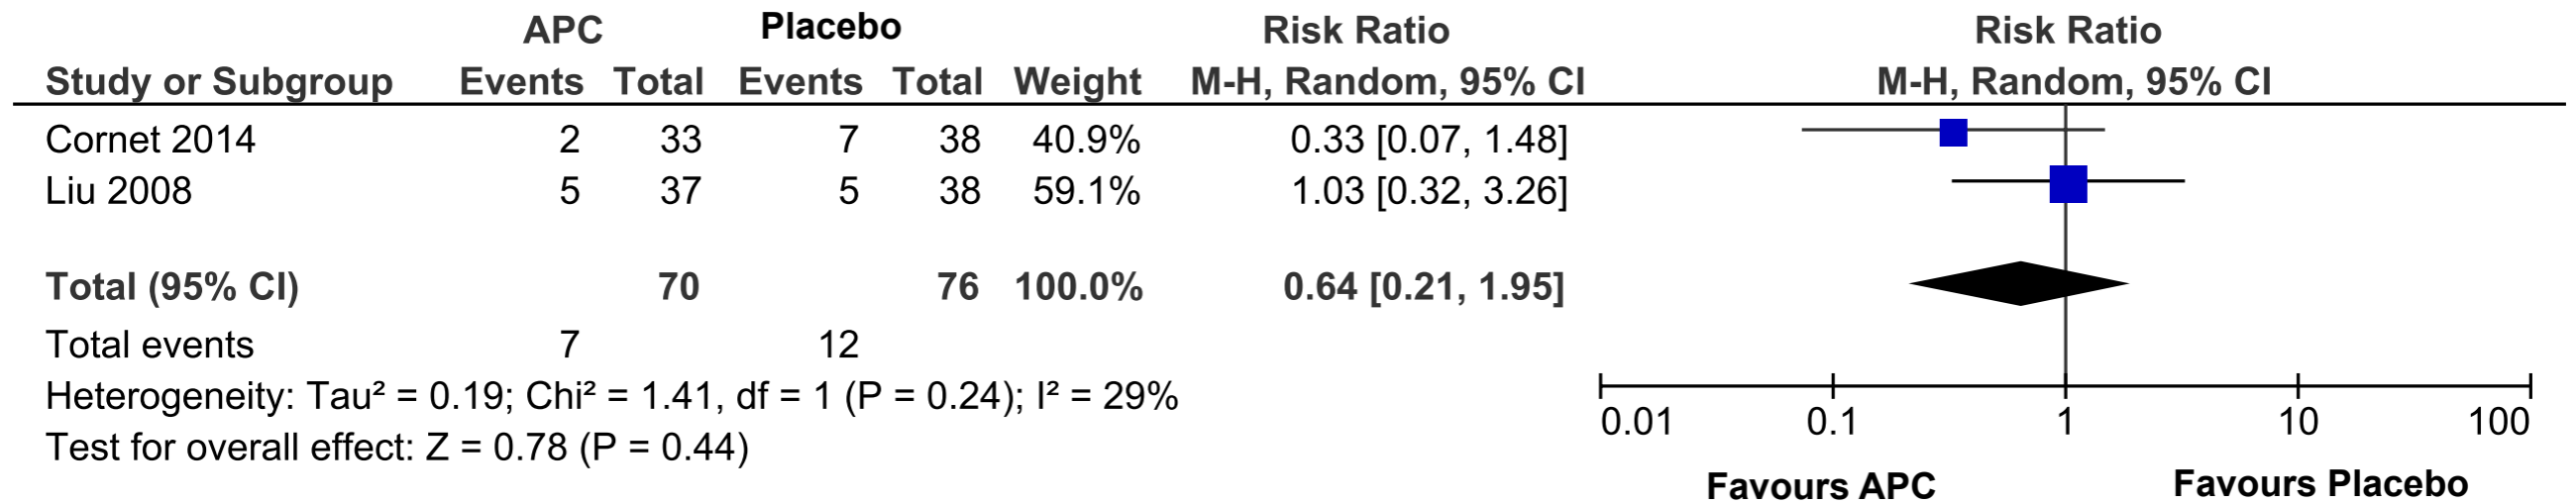

## Severe complication

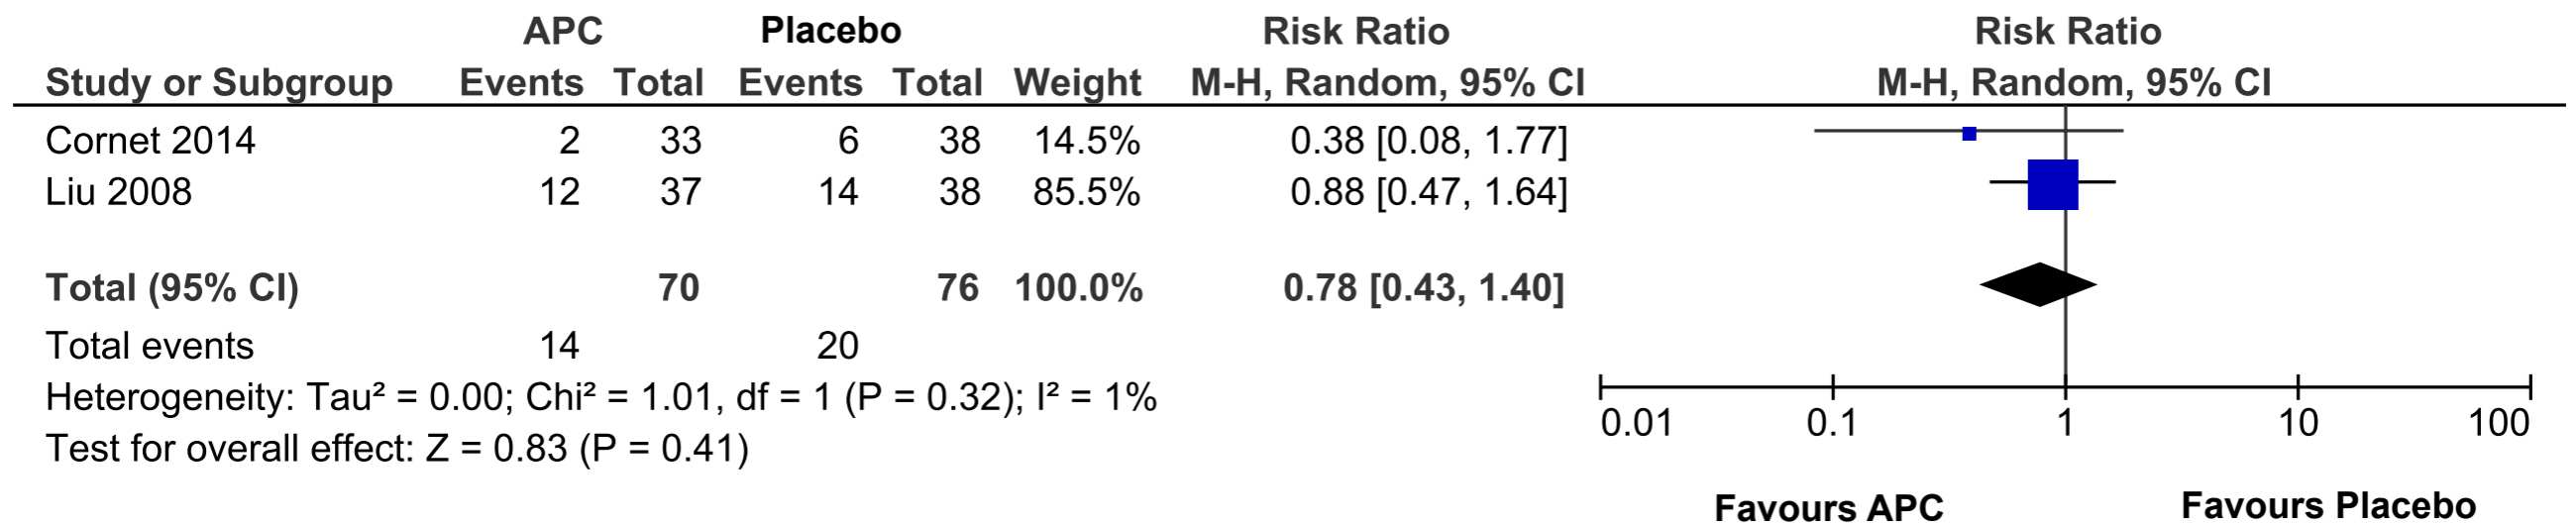

## Short term mortality

|               | Random sequence generation (selection bias) | Allocation concealment (selection bias) | Blinding of participants and personnel (performance bias) | Blinding of outcome assessment (detection bias) | Incomplete outcome data (attrition bias) | Selective reporting (reporting bias) | Other bias |
|---------------|---------------------------------------------|-----------------------------------------|-----------------------------------------------------------|-------------------------------------------------|------------------------------------------|--------------------------------------|------------|
| Bernard 1997  | +                                           | +                                       | +                                                         | +                                               | +                                        | ?                                    | +          |
| Jepsen 1992   | ?                                           | ?                                       | +                                                         | +                                               | +                                        | ?                                    | +          |
| Ortolani 2000 | ?                                           | ?                                       | -                                                         | -                                               | +                                        | ?                                    | ?          |
| Suter 1994    | ?                                           | ?                                       | +                                                         | +                                               | +                                        | ?                                    | ?          |

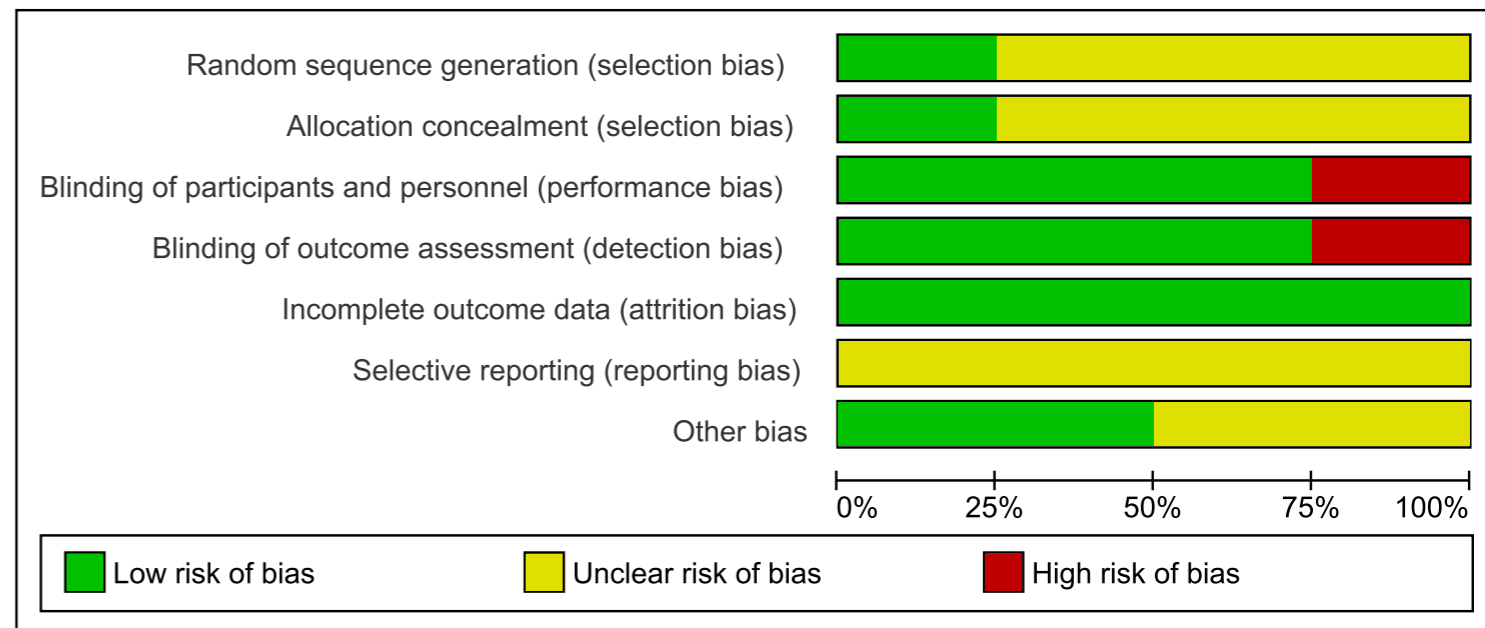

## Short term mortality

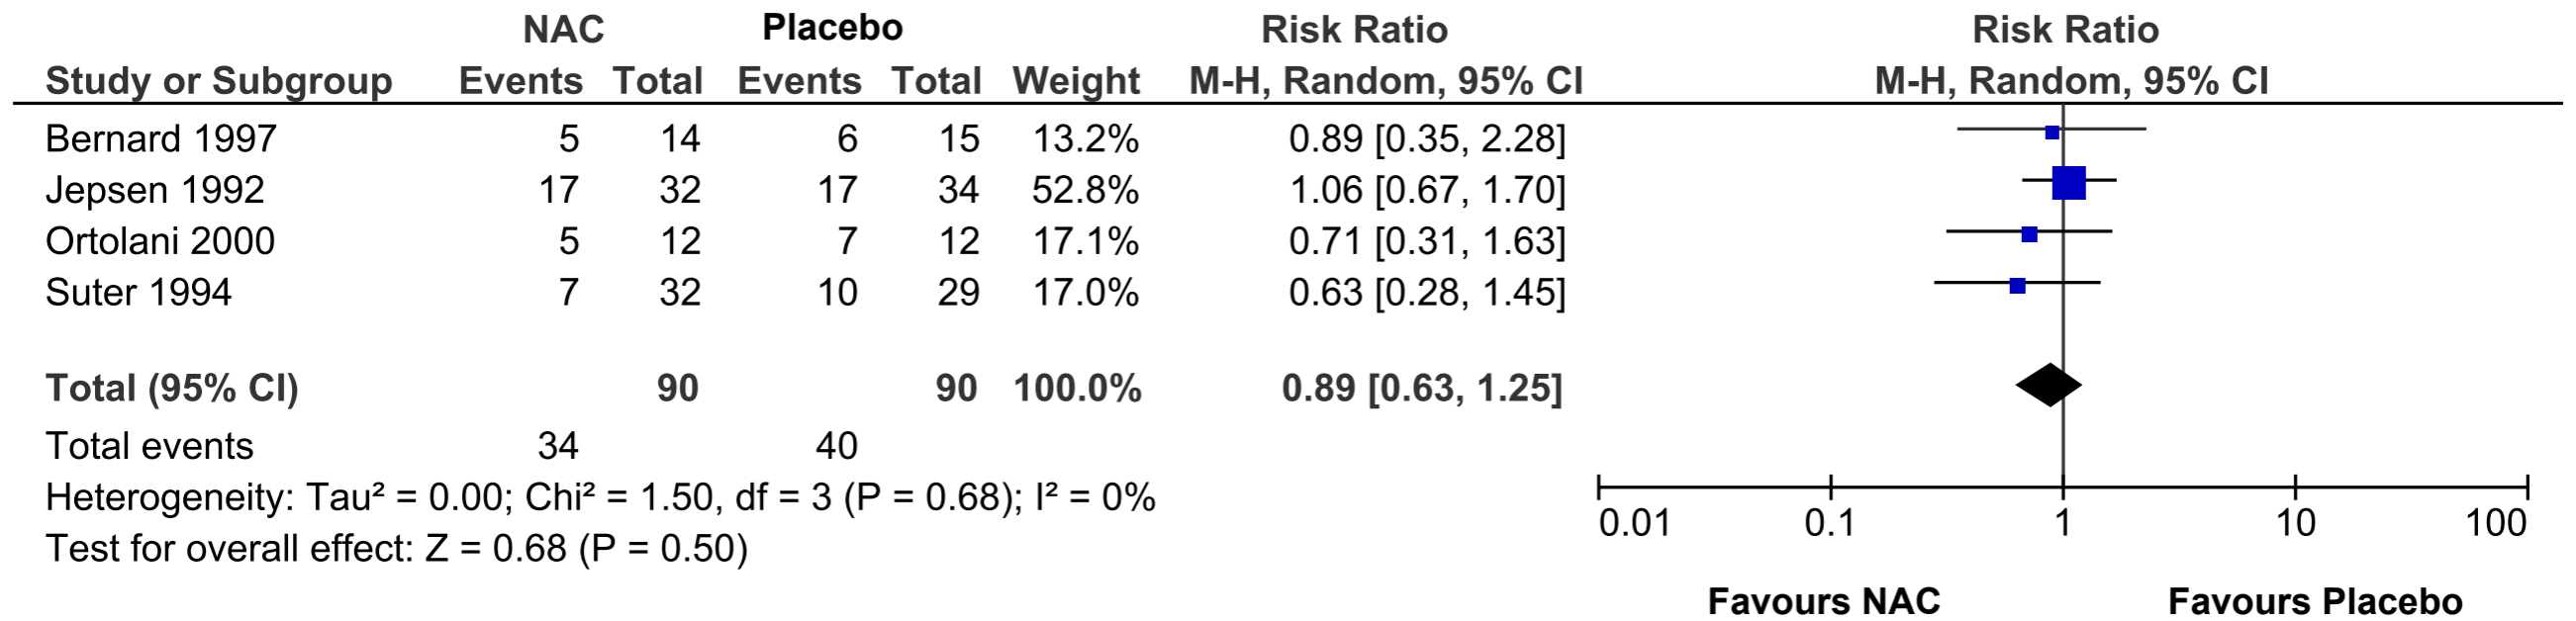

## Short term mortality

ARDS net 2000

|                                                           |   |
|-----------------------------------------------------------|---|
| Random sequence generation (selection bias)               | + |
| Allocation concealment (selection bias)                   | + |
| Blinding of participants and personnel (performance bias) | + |
| Blinding of outcome assessment (detection bias)           | + |
| Incomplete outcome data (attrition bias)                  | ? |
| Selective reporting (reporting bias)                      | ? |
| Other bias                                                | ? |

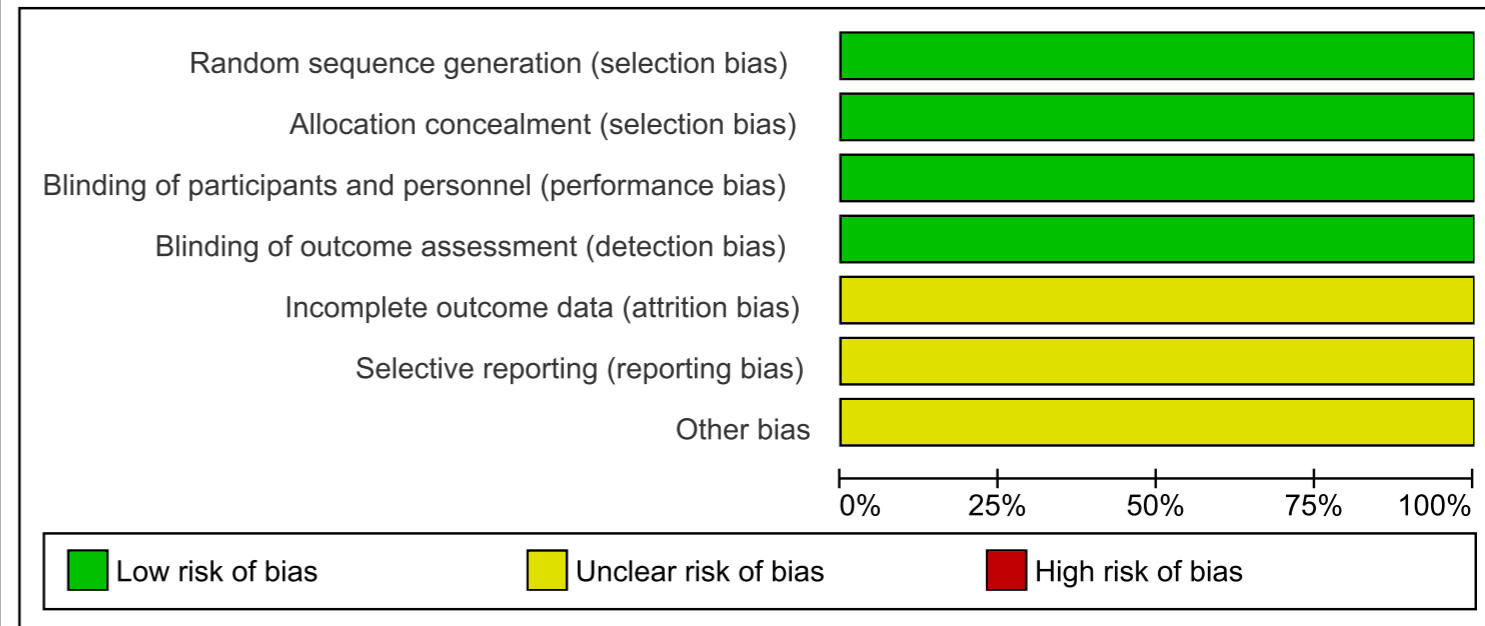

## Severe complication

ARDS net 2000

|                                                           |   |
|-----------------------------------------------------------|---|
| Random sequence generation (selection bias)               | + |
| Allocation concealment (selection bias)                   | + |
| Blinding of participants and personnel (performance bias) | + |
| Blinding of outcome assessment (detection bias)           | + |
| Incomplete outcome data (attrition bias)                  | + |
| Selective reporting (reporting bias)                      | ? |
| Other bias                                                | ? |

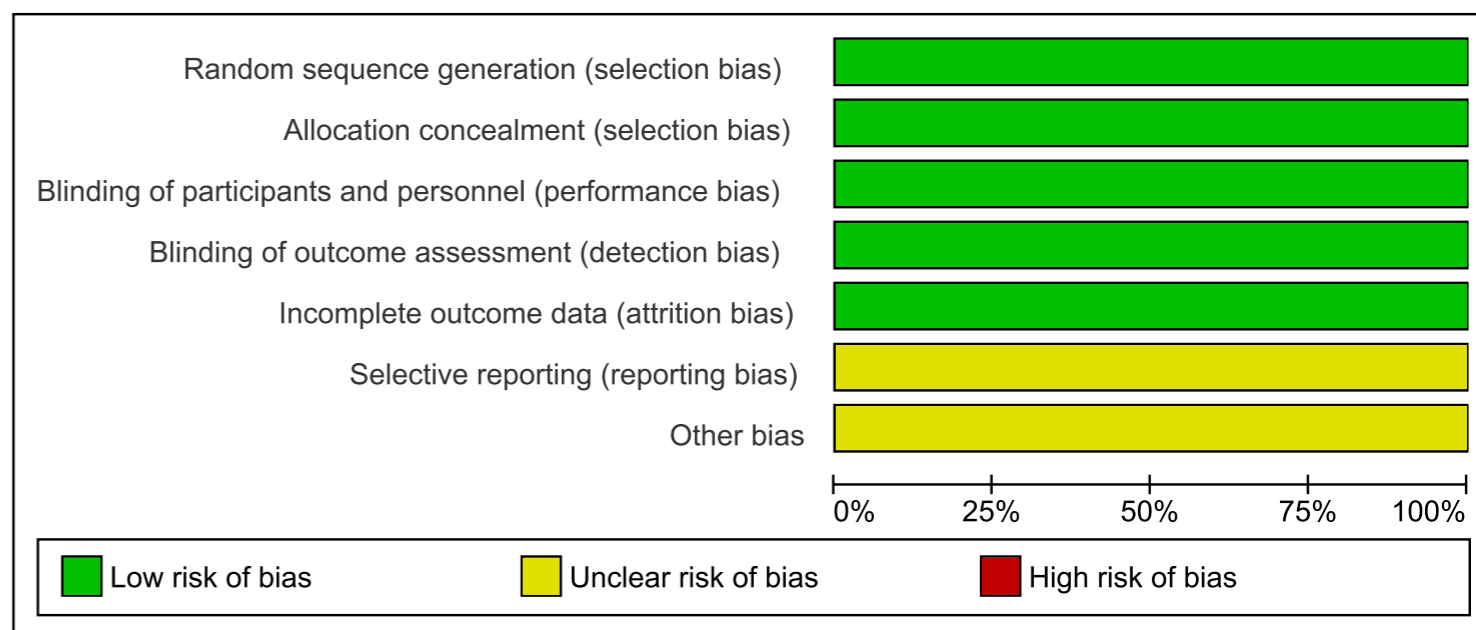

## Short term mortality

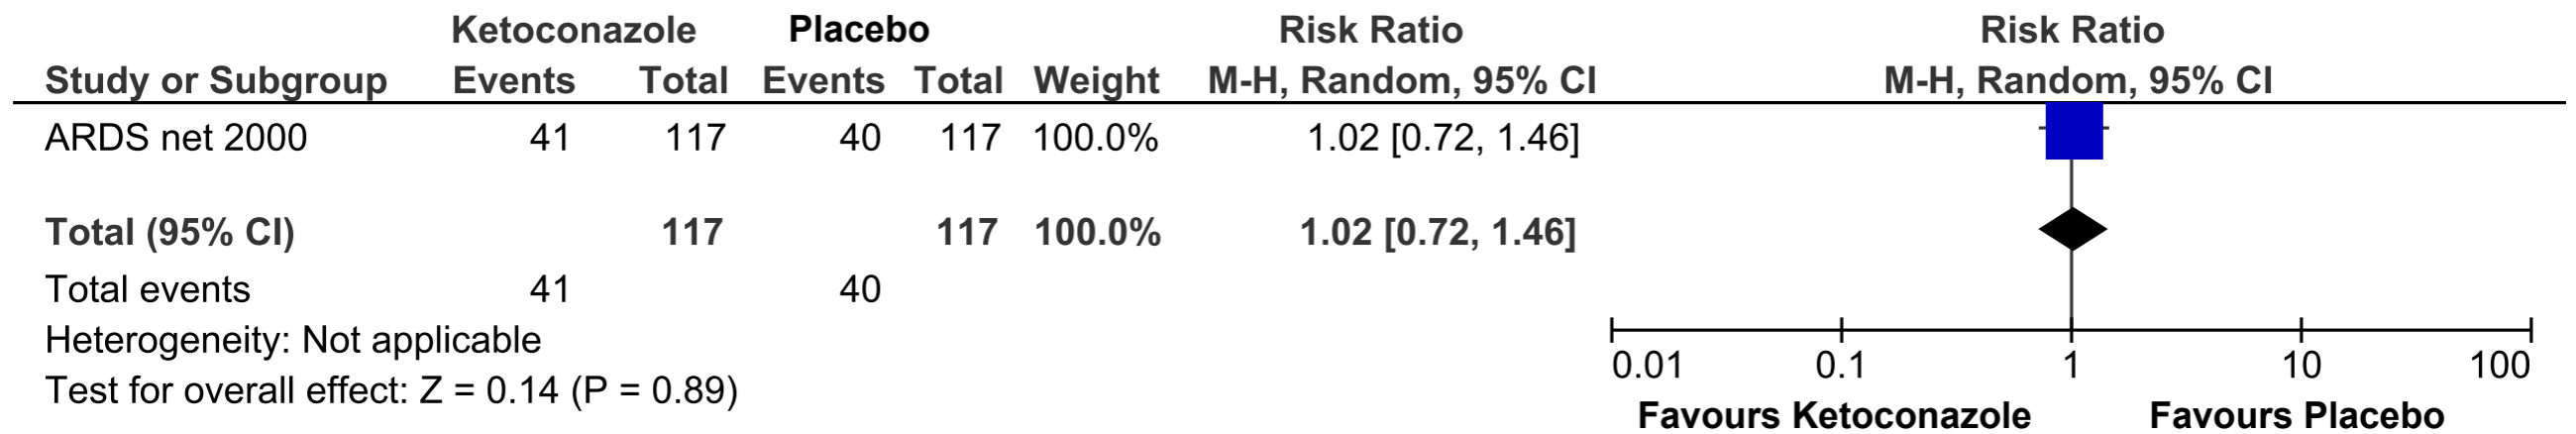

## Severe complication

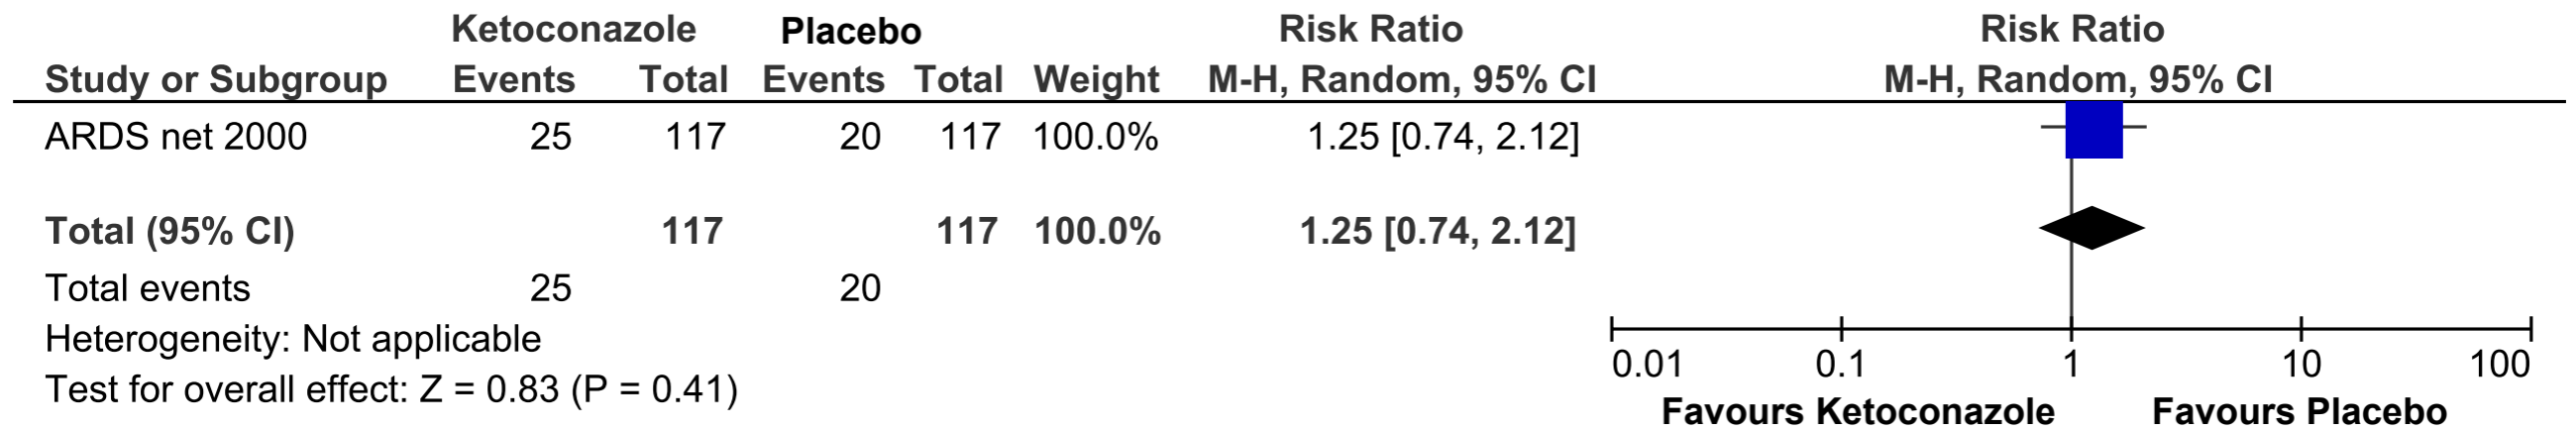



## Short term mortality

Wiedemann 2002

|                                                           |   |
|-----------------------------------------------------------|---|
| Random sequence generation (selection bias)               | + |
| Allocation concealment (selection bias)                   | + |
| Blinding of participants and personnel (performance bias) | + |
| Blinding of outcome assessment (detection bias)           | + |
| Incomplete outcome data (attrition bias)                  | + |
| Selective reporting (reporting bias)                      | ? |
| Other bias                                                | ? |

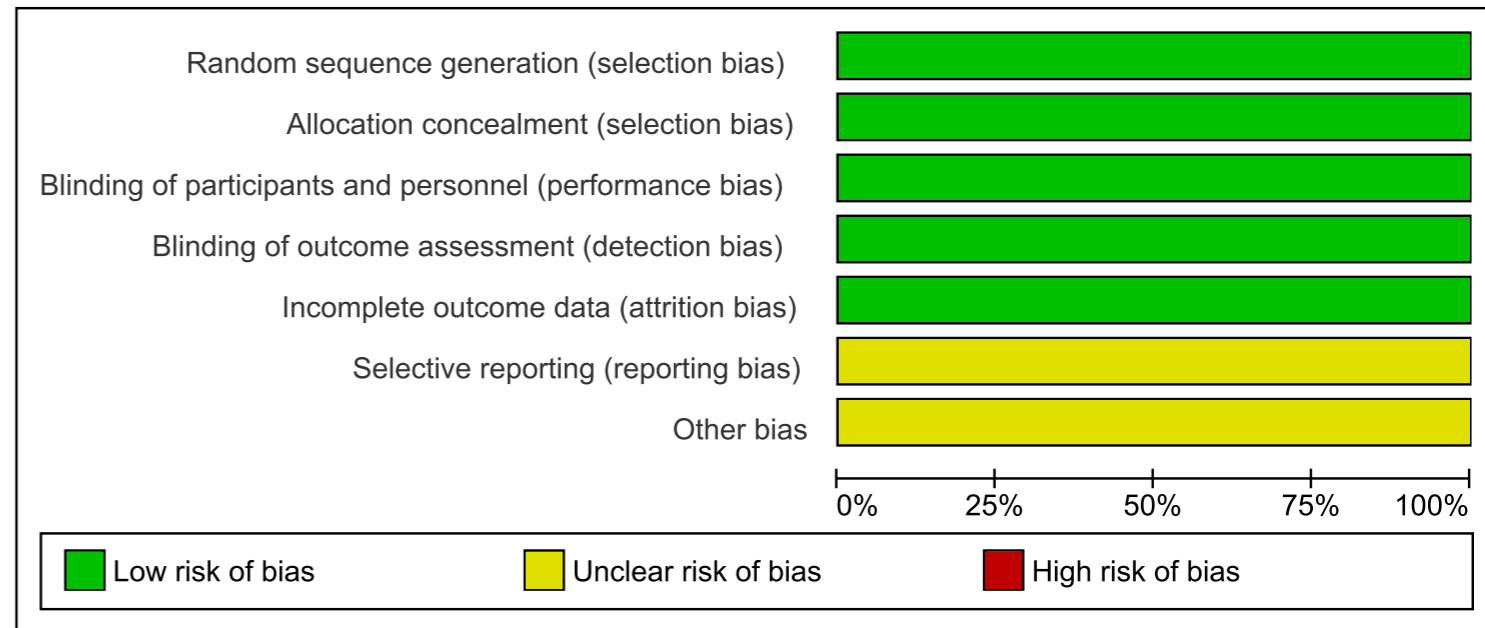

## Short term mortality

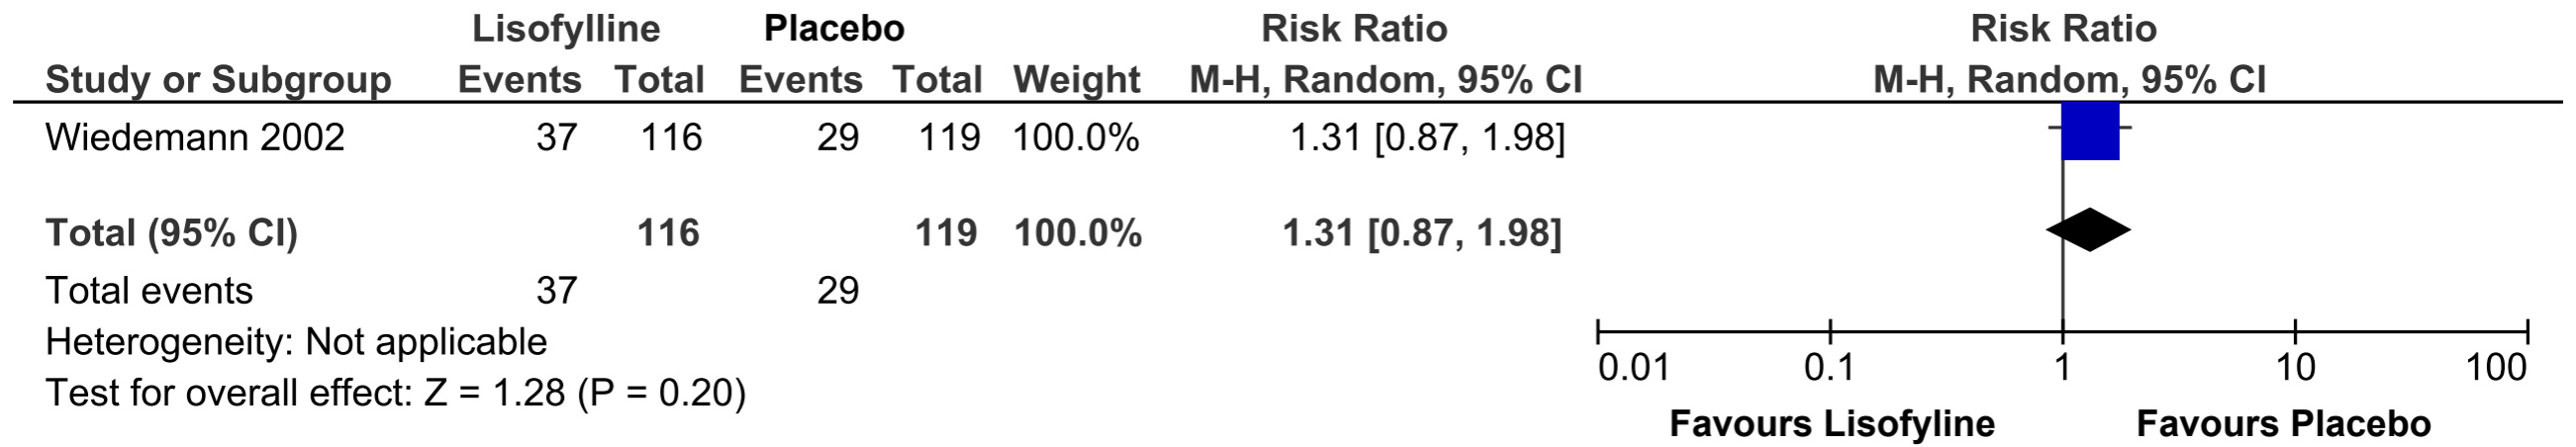

## CQ13-01 Summary of findings:

**Inhaled nitric oxide compared to placebo for adult ARDS**

Patient or population: ARDS

Intervention: Inhaled nitric oxide (NO)

Comparison: placebo

| Outcomes                    | Anticipated absolute effects* (95% CI) |                                      | Relative effect (95% CI)         | No of participants (studies) | Quality of the evidence (GRADE) |
|-----------------------------|----------------------------------------|--------------------------------------|----------------------------------|------------------------------|---------------------------------|
|                             | Risk with placebo                      | Risk with Inhaled NO                 |                                  |                              |                                 |
| Short-term (<90d) mortality | <b>Study population</b>                |                                      | <b>RR 1.18</b><br>(0.91 to 1.52) | 699<br>(7 RCTs)              | ⊕⊕○○<br>LOW <sup>1,2</sup>      |
|                             | 225 per 1000                           | <b>266 per 1000</b><br>(205 to 343)  |                                  |                              |                                 |
|                             | <b>Low</b>                             |                                      |                                  |                              |                                 |
|                             | 190 per 1000                           | <b>224 per 1000</b><br>(173 to 289)  |                                  |                              |                                 |
|                             | <b>High</b>                            |                                      |                                  |                              |                                 |
|                             | 450 per 1000                           | <b>531 per 1000</b><br>(410 to 684)  |                                  |                              |                                 |
| Severe adverse effects      | <b>Study population</b>                |                                      | <b>RR 1.90</b><br>(0.78 to 4.66) | 562<br>(2 RCTs)              | ⊕⊕⊕○<br>MODERATE <sup>2</sup>   |
|                             | 28 per 1000                            | <b>53 per 1000</b><br>(22 to 130)    |                                  |                              |                                 |
|                             | <b>Low</b>                             |                                      |                                  |                              |                                 |
|                             | 20 per 1000                            | <b>38 per 1000</b><br>(16 to 93)     |                                  |                              |                                 |
|                             | <b>High</b>                            |                                      |                                  |                              |                                 |
|                             | 240 per 1000                           | <b>456 per 1000</b><br>(187 to 1000) |                                  |                              |                                 |

\*The risk in the intervention group (and its 95% confidence interval) is based on the assumed risk in the comparison group and the relative effect of the intervention (and its 95% CI).

CI: Confidence interval; RR: Risk ratio

**GRADE Working Group grades of evidence**

**High quality:** We are very confident that the true effect lies close to that of the estimate of the effect

**Moderate quality:** We are moderately confident in the effect estimate: The true effect is likely to be close to the estimate of the effect, but there is a possibility that it is substantially different

**Low quality:** Our confidence in the effect estimate is limited: The true effect may be substantially different from the estimate of the effect

**Very low quality:** We have very little confidence in the effect estimate: The true effect is likely to be substantially different from the estimate of effect

1. A lot of high risk of bias in the blinding procedure
2. Wide range of 95%CI due to a limited number of patients

## CQ13-02 Summary of findings:

**Inhaled beta2 stimulant compared to placebo for adult ARDS**

Patient or population: ARDS

Intervention: Inhaled beta2 stimulant

Comparison: placebo

| Outcomes                    | Anticipated absolute effects* (95% CI) |                                      | Relative effect (95% CI)  | № of participants (studies) | Quality of the evidence (GRADE) | Comments |
|-----------------------------|----------------------------------------|--------------------------------------|---------------------------|-----------------------------|---------------------------------|----------|
|                             | Risk with placebo                      | Risk with Inhaled beta2 stimulant    |                           |                             |                                 |          |
| Short-term (<90d) mortality | Study population                       |                                      | RR 1.32<br>(0.83 to 2.08) | 282<br>(1 RCT)              | ⊕⊕⊕○<br>MODERATE <sup>1</sup>   |          |
|                             | 185 per 1000                           | <b>244 per 1000</b><br>(153 to 384)  |                           |                             |                                 |          |
|                             | Low                                    |                                      |                           |                             |                                 |          |
|                             | 190 per 1000                           | <b>251 per 1000</b><br>(158 to 395)  |                           |                             |                                 |          |
|                             | High                                   |                                      |                           |                             |                                 |          |
|                             | 450 per 1000                           | <b>594 per 1000</b><br>(374 to 936)  |                           |                             |                                 |          |
| Severe adverse effects      | Study population                       |                                      | RR 2.57<br>(0.85 to 7.76) | 282<br>(1 RCT)              | ⊕⊕⊕○<br>MODERATE <sup>1</sup>   |          |
|                             | 31 per 1000                            | <b>79 per 1000</b><br>(26 to 239)    |                           |                             |                                 |          |
|                             | Low                                    |                                      |                           |                             |                                 |          |
|                             | 20 per 1000                            | <b>51 per 1000</b><br>(17 to 155)    |                           |                             |                                 |          |
|                             | High                                   |                                      |                           |                             |                                 |          |
|                             | 240 per 1000                           | <b>617 per 1000</b><br>(204 to 1000) |                           |                             |                                 |          |

\*The risk in the intervention group (and its 95% confidence interval) is based on the assumed risk in the comparison group and the relative effect of the intervention (and its 95% CI).

CI: Confidence interval; RR: Risk ratio

**GRADE Working Group grades of evidence**

**High quality:** We are very confident that the true effect lies close to that of the estimate of the effect

**Moderate quality:** We are moderately confident in the effect estimate: The true effect is likely to be close to the estimate of the effect, but there is a possibility that it is substantially different

**Low quality:** Our confidence in the effect estimate is limited: The true effect may be substantially different from the estimate of the effect

**Very low quality:** We have very little confidence in the effect estimate: The true effect is likely to be substantially different from the estimate of effect

1. Wide range of 95%CI due to a limited number of patients

## CQ13-03 Summary of findings:

**Intravenous beta2 stimulant compared to placebo for adult ARDS**

Patient or population: ARDS

Intervention: Intravenous beta2 stimulant

Comparison: placebo

| Outcomes                    | Anticipated absolute effects* (95% CI) |                                       | Relative effect (95% CI)   | № of participants (studies) | Quality of the evidence (GRADE) | Comments |
|-----------------------------|----------------------------------------|---------------------------------------|----------------------------|-----------------------------|---------------------------------|----------|
|                             | Risk with placebo                      | Risk with Intravenous beta2 stimulant |                            |                             |                                 |          |
| Short-term (<90d) mortality | Study population                       |                                       | RR 1.16<br>(0.68 to 1.96)  | 364<br>(2 RCTs)             | ⊕⊕○○<br>LOW <sup>1,2</sup>      |          |
|                             | 283 per 1000                           | <b>328 per 1000</b><br>(192 to 554)   |                            |                             |                                 |          |
|                             | Low                                    |                                       |                            |                             |                                 |          |
|                             | 190 per 1000                           | <b>220 per 1000</b><br>(129 to 372)   |                            |                             |                                 |          |
|                             | High                                   |                                       |                            |                             |                                 |          |
|                             | 450 per 1000                           | <b>522 per 1000</b><br>(306 to 882)   |                            |                             |                                 |          |
| Severe adverse effects      | Study population                       |                                       | RR 5.78<br>(1.34 to 24.92) | 365<br>(2 RCTs)             | ⊕⊕⊕○<br>MODERATE <sup>3</sup>   |          |
|                             | 22 per 1000                            | <b>126 per 1000</b><br>(29 to 542)    |                            |                             |                                 |          |
|                             | Low                                    |                                       |                            |                             |                                 |          |
|                             | 20 per 1000                            | <b>116 per 1000</b><br>(27 to 498)    |                            |                             |                                 |          |
|                             | High                                   |                                       |                            |                             |                                 |          |
|                             | 240 per 1000                           | <b>1000 per 1000</b><br>(322 to 1000) |                            |                             |                                 |          |

\*The risk in the intervention group (and its 95% confidence interval) is based on the assumed risk in the comparison group and the relative effect of the intervention (and its 95% CI).

CI: Confidence interval; RR: Risk ratio

**GRADE Working Group grades of evidence**

**High quality:** We are very confident that the true effect lies close to that of the estimate of the effect

**Moderate quality:** We are moderately confident in the effect estimate: The true effect is likely to be close to the estimate of the effect, but there is a possibility that it is substantially different

**Low quality:** Our confidence in the effect estimate is limited: The true effect may be substantially different from the estimate of the effect

**Very low quality:** We have very little confidence in the effect estimate: The true effect is likely to be substantially different from the estimate of effect

1. High value of I<sup>2</sup>
2. Wide range of 95%CI due to a limited number of patients
3. The number of patients was less than optimal for the information size.

## CQ13-04 Summary of findings:

**Granulocyte-macrophage colony-stimulating factor (GM-CSF) compared to placebo for adult ARDS**

Patient or population: ARDS

Intervention: Granulocyte-macrophage colony-stimulating factor (GM-CSF)

Comparison: placebo

| Outcomes                    | Anticipated absolute effects* (95% CI) |                                                                     | Relative effect (95% CI)  | № of participants (studies) | Quality of the evidence (GRADE) | Comments |
|-----------------------------|----------------------------------------|---------------------------------------------------------------------|---------------------------|-----------------------------|---------------------------------|----------|
|                             | Risk with placebo                      | Risk with Granulocyte-macrophage colony-stimulating factor (GM-CSF) |                           |                             |                                 |          |
| Short-term (<90d) mortality | Study population                       |                                                                     | RR 0.76<br>(0.40 to 1.46) | 148<br>(2 RCTs)             | ⊕⊕⊕○<br>MODERATE <sup>1</sup>   |          |
|                             | 230 per 1000                           | 175 per 1000<br>(92 to 335)                                         |                           |                             |                                 |          |
|                             | Low                                    |                                                                     |                           |                             |                                 |          |
|                             | 190 per 1000                           | 144 per 1000<br>(76 to 277)                                         |                           |                             |                                 |          |
|                             | High                                   |                                                                     |                           |                             |                                 |          |
|                             | 450 per 1000                           | 342 per 1000<br>(180 to 657)                                        |                           |                             |                                 |          |
| Severe adverse effects      | Study population                       |                                                                     | RR 0.87<br>(0.42 to 1.80) | 130<br>(1 RCT)              | ⊕⊕⊕○<br>MODERATE <sup>1</sup>   |          |
|                             | 197 per 1000                           | 171 per 1000<br>(83 to 355)                                         |                           |                             |                                 |          |
|                             | Low                                    |                                                                     |                           |                             |                                 |          |
|                             | 20 per 1000                            | 17 per 1000<br>(8 to 36)                                            |                           |                             |                                 |          |
|                             | High                                   |                                                                     |                           |                             |                                 |          |
|                             | 240 per 1000                           | 209 per 1000<br>(101 to 432)                                        |                           |                             |                                 |          |

\*The risk in the intervention group (and its 95% confidence interval) is based on the assumed risk in the comparison group and the relative effect of the intervention (and its 95% CI).

CI: Confidence interval; RR: Risk ratio

**GRADE Working Group grades of evidence**

**High quality:** We are very confident that the true effect lies close to that of the estimate of the effect

**Moderate quality:** We are moderately confident in the effect estimate: The true effect is likely to be close to the estimate of the effect, but there is a possibility that it is substantially different

**Low quality:** Our confidence in the effect estimate is limited: The true effect may be substantially different from the estimate of the effect

**Very low quality:** We have very little confidence in the effect estimate: The true effect is likely to be substantially different from the estimate of effect

1. Wide range of 95%CI due to a limited number of patients

## CQ13-05 Summary of findings:

**Prostaglandin E<sub>1</sub> compared to placebo for adult ARDS**

Patient or population: ARDS

Intervention: Prostaglandin E<sub>1</sub>

Comparison: placebo

| Outcomes                    | Anticipated absolute effects* (95% CI) |                                        | Relative effect (95% CI)  | № of participants (studies) | Quality of the evidence (GRADE) | Comments |
|-----------------------------|----------------------------------------|----------------------------------------|---------------------------|-----------------------------|---------------------------------|----------|
|                             | Risk with placebo                      | Risk with Prostaglandin E <sub>1</sub> |                           |                             |                                 |          |
| Short-term (<90d) mortality | Study population                       |                                        | RR 1.07<br>(0.90 to 1.27) | 786<br>(7 RCTs)             | ⊕⊕⊕○<br>MODERATE <sup>1</sup>   |          |
|                             | 380 per 1000                           | <b>407 per 1000</b><br>(342 to 483)    |                           |                             |                                 |          |
|                             | Low                                    |                                        |                           |                             |                                 |          |
|                             | 190 per 1000                           | <b>203 per 1000</b><br>(171 to 241)    |                           |                             |                                 |          |
|                             | High                                   |                                        |                           |                             |                                 |          |
|                             | 450 per 1000                           | <b>482 per 1000</b><br>(405 to 572)    |                           |                             |                                 |          |
| Severe adverse effects      | Study population                       |                                        | RR 2.07<br>(1.12 to 3.83) | 498<br>(4 RCTs)             | ⊕⊕⊕○<br>MODERATE <sup>1</sup>   |          |
|                             | 161 per 1000                           | <b>334 per 1000</b><br>(180 to 617)    |                           |                             |                                 |          |
|                             | Low                                    |                                        |                           |                             |                                 |          |
|                             | 20 per 1000                            | <b>41 per 1000</b><br>(22 to 77)       |                           |                             |                                 |          |
|                             | High                                   |                                        |                           |                             |                                 |          |
|                             | 240 per 1000                           | <b>497 per 1000</b><br>(269 to 919)    |                           |                             |                                 |          |

\*The risk in the intervention group (and its 95% confidence interval) is based on the assumed risk in the comparison group and the relative effect of the intervention (and its 95% CI).

CI: Confidence interval; RR: Risk ratio

**GRADE Working Group grades of evidence**

**High quality:** We are very confident that the true effect lies close to that of the estimate of the effect

**Moderate quality:** We are moderately confident in the effect estimate: The true effect is likely to be close to the estimate of the effect, but there is a possibility that it is substantially different

**Low quality:** Our confidence in the effect estimate is limited: The true effect may be substantially different from the estimate of the effect

**Very low quality:** We have very little confidence in the effect estimate: The true effect is likely to be substantially different from the estimate of effect

1. Wide range of 95%CI due to a limited number of patients

## CQ13-06 Summary of findings:

**Statin compared to placebo for adult ARDS**

Patient or population: ARDS

Intervention: Statin

Comparison: placebo

| Outcomes                    | Anticipated absolute effects* (95% CI) |                                     | Relative effect (95% CI)  | No of participants (studies) | Quality of the evidence (GRADE) | Comments |
|-----------------------------|----------------------------------------|-------------------------------------|---------------------------|------------------------------|---------------------------------|----------|
|                             | Risk with placebo                      | Risk with Statin                    |                           |                              |                                 |          |
| Short-term (<90d) mortality | Study population                       |                                     | RR 0.98<br>(0.71 to 1.36) | 1284<br>(2 RCTs)             | ⊕⊕○○<br>LOW <sup>1,2</sup>      |          |
|                             | 257 per 1000                           | <b>252 per 1000</b><br>(182 to 349) |                           |                              |                                 |          |
|                             | Low                                    |                                     |                           |                              |                                 |          |
|                             | 190 per 1000                           | <b>186 per 1000</b><br>(135 to 258) |                           |                              |                                 |          |
|                             | High                                   |                                     |                           |                              |                                 |          |
|                             | 450 per 1000                           | <b>441 per 1000</b><br>(320 to 612) |                           |                              |                                 |          |
| Severe adverse effects      | Study population                       |                                     | RR 1.36<br>(0.69 to 2.67) | 599<br>(2 RCTs)              | ⊕⊕⊕○<br>MODERATE <sup>2</sup>   |          |
|                             | 74 per 1000                            | <b>101 per 1000</b><br>(51 to 198)  |                           |                              |                                 |          |
|                             | Low                                    |                                     |                           |                              |                                 |          |
|                             | 20 per 1000                            | <b>27 per 1000</b><br>(14 to 53)    |                           |                              |                                 |          |
|                             | High                                   |                                     |                           |                              |                                 |          |
|                             | 240 per 1000                           | <b>326 per 1000</b><br>(166 to 641) |                           |                              |                                 |          |

\*The risk in the intervention group (and its 95% confidence interval) is based on the assumed risk in the comparison group and the relative effect of the intervention (and its 95% CI).

CI: Confidence interval; RR: Risk ratio

**GRADE Working Group grades of evidence**

**High quality:** We are very confident that the true effect lies close to that of the estimate of the effect

**Moderate quality:** We are moderately confident in the effect estimate: The true effect is likely to be close to the estimate of the effect, but there is a possibility that it is substantially different

**Low quality:** Our confidence in the effect estimate is limited: The true effect may be substantially different from the estimate of the effect

**Very low quality:** We have very little confidence in the effect estimate: The true effect is likely to be substantially different from the estimate of effect

1. Increased value of I<sup>2</sup>
2. Wide range of 95%CI due to a limited number of patients



## CQ13-07 Summary of findings:

**Surfactant compared to placebo for adult ARDS**

Patient or population: ARDS

Intervention: Surfactant

Comparison: placebo

| Outcomes                    | Anticipated absolute effects* (95% CI) |                              | Relative effect (95% CI)  | № of participants (studies) | Quality of the evidence (GRADE) | Comments |
|-----------------------------|----------------------------------------|------------------------------|---------------------------|-----------------------------|---------------------------------|----------|
|                             | Risk with placebo                      | Risk with Surfactant         |                           |                             |                                 |          |
| Short-term (<90d) mortality | Study population                       |                              | RR 0.98<br>(0.88 to 1.09) | 2894<br>(9 RCTs)            | ⊕⊕○○<br>LOW <sup>1,2</sup>      |          |
|                             | 304 per 1000                           | 298 per 1000<br>(268 to 332) |                           |                             |                                 |          |
|                             | Low                                    |                              |                           |                             |                                 |          |
|                             | 190 per 1000                           | 186 per 1000<br>(167 to 207) |                           |                             |                                 |          |
| Severe adverse effects      | Study population                       |                              | RR 1.44<br>(0.99 to 2.09) | 2801<br>(6 RCTs)            | ⊕○○○<br>VERY LOW <sup>2,3</sup> |          |
|                             | 195 per 1000                           | 280 per 1000<br>(193 to 407) |                           |                             |                                 |          |
|                             | Low                                    |                              |                           |                             |                                 |          |
|                             | 20 per 1000                            | 29 per 1000<br>(20 to 42)    |                           |                             |                                 |          |
|                             | Study population                       |                              |                           |                             |                                 |          |
|                             | 450 per 1000                           | 441 per 1000<br>(396 to 491) |                           |                             |                                 |          |
|                             | High                                   |                              |                           |                             |                                 |          |
|                             | 240 per 1000                           | 346 per 1000<br>(238 to 502) |                           |                             |                                 |          |

\*The risk in the intervention group (and its 95% confidence interval) is based on the assumed risk in the comparison group and the relative effect of the intervention (and its 95% CI).

CI: Confidence interval; RR: Risk ratio; MD: Mean difference

**GRADE Working Group grades of evidence**

**High quality:** We are very confident that the true effect lies close to that of the estimate of the effect

**Moderate quality:** We are moderately confident in the effect estimate: The true effect is likely to be close to the estimate of the effect, but there is a possibility that it is substantially different

**Low quality:** Our confidence in the effect estimate is limited: The true effect may be substantially different from the estimate of the effect

**Very low quality:** We have very little confidence in the effect estimate: The true effect is likely to be substantially different from the estimate of effect

1. A lot of high risk of bias in the blinding procedure
2. Wide range of 95%CI due to a limited number of patients
3. Increased value of I<sup>2</sup>

## CQ13-08 Summary of findings:

**Activated protein C compared to placebo for adult ARDS**

**Patient or population:** ARDS  
**Intervention:** Activated protein C  
**Comparison:** placebo

| Outcomes                    | Anticipated absolute effects* (95% CI) |                               | Relative effect (95% CI) | No of participants (studies) | Quality of the evidence (GRADE) | Comments |
|-----------------------------|----------------------------------------|-------------------------------|--------------------------|------------------------------|---------------------------------|----------|
|                             | Risk with placebo                      | Risk with Activated protein C |                          |                              |                                 |          |
| Short-term (<90d) mortality | Study population                       |                               | RR 0.64<br>(0.21to1.95)  | 146<br>(2 RCTs)              | ⊕⊕⊕○<br>MODERATE <sup>1</sup>   |          |
|                             | 158 per 1000                           | 101 per 1000<br>(33 to 308)   |                          |                              |                                 |          |
|                             | Low                                    |                               |                          |                              |                                 |          |
|                             | 190 per 1000                           | 122 per 1000<br>(40 to 371)   |                          |                              |                                 |          |
| Severe adverse effects      | Study population                       |                               | RR 0.78<br>(0.43to1.40)  | 146<br>(2 RCTs)              | ⊕⊕○○<br>LOW <sup>1,2</sup>      |          |
|                             | 263 per 1000                           | 205 per 1000<br>(113 to 368)  |                          |                              |                                 |          |
|                             | Low                                    |                               |                          |                              |                                 |          |
|                             | 20 per 1000                            | 16 per 1000<br>(9 to 28)      |                          |                              |                                 |          |
|                             | High                                   |                               |                          |                              |                                 |          |
|                             | 450 per 1000                           | 288 per 1000<br>(95 to 878)   |                          |                              |                                 |          |
|                             | 240 per 1000                           | 187 per 1000<br>(103 to 336)  |                          |                              |                                 |          |

\*The risk in the intervention group (and its 95% confidence interval) is based on the assumed risk in the comparison group and the relative effect of the intervention (and its 95% CI).

CI: Confidence interval; RR: Risk ratio

**GRADE Working Group grades of evidence**

**High quality:** We are very confident that the true effect lies close to that of the estimate of the effect

**Moderate quality:** We are moderately confident in the effect estimate: The true effect is likely to be close to the estimate of the effect, but there is a possibility that it is substantially different

**Low quality:** Our confidence in the effect estimate is limited: The true effect may be substantially different from the estimate of the effect

**Very low quality:** We have very little confidence in the effect estimate: The true effect is likely to be substantially different from the estimate of effect

1. Wide range of 95%CI due to a limited number of patients
2. A lot of high risk of bias in the selection and blinding procedure

## CQ13-09 Summary of findings:

**N-acetylcysteine compared to placebo for adult ARDS**

Patient or population: ARDS

Intervention: N-acetylcysteine

Comparison: placebo

| Outcomes                    | Anticipated absolute effects* (95% CI) |                              | Relative effect (95% CI)  | № of participants (studies) | Quality of the evidence (GRADE) | Comments |
|-----------------------------|----------------------------------------|------------------------------|---------------------------|-----------------------------|---------------------------------|----------|
|                             | Risk with placebo                      | Risk with N-acetylcysteine   |                           |                             |                                 |          |
| Short-term (<90d) mortality | Study population                       |                              | RR 0.89<br>(0.63 to 1.25) | 180<br>(4 RCTs)             | ⊕⊕⊕○<br>MODERATE <sup>1</sup>   |          |
|                             | 444 per 1000                           | 396 per 1000<br>(280 to 556) |                           |                             |                                 |          |
|                             | Low                                    |                              |                           |                             |                                 |          |
|                             | 190 per 1000                           | 169 per 1000<br>(120 to 238) |                           |                             |                                 |          |
| Severe adverse effects      | High                                   |                              | ---                       | ---                         | ---                             |          |
|                             | 450 per 1000                           | 401 per 1000<br>(284 to 563) |                           |                             |                                 |          |
|                             | Study population                       |                              |                           |                             |                                 |          |
|                             | ---                                    | ---                          |                           |                             |                                 |          |

\*The risk in the intervention group (and its 95% confidence interval) is based on the assumed risk in the comparison group and the relative effect of the intervention (and its 95% CI).

CI: Confidence interval; RR: Risk ratio

**GRADE Working Group grades of evidence**

**High quality:** We are very confident that the true effect lies close to that of the estimate of the effect

**Moderate quality:** We are moderately confident in the effect estimate: The true effect is likely to be close to the estimate of the effect, but there is a possibility that it is substantially different

**Low quality:** Our confidence in the effect estimate is limited: The true effect may be substantially different from the estimate of the effect

**Very low quality:** We have very little confidence in the effect estimate: The true effect is likely to be substantially different from the estimate of effect

1. Wide range of 95%CI due to a limited number of patients

## CQ13-10 Summary of findings:

**Ketoconazole compared to placebo for adult ARDS**

Patient or population: ARDS

Intervention: Ketoconazole

Comparison: placebo

| Outcomes                    | Anticipated absolute effects* (95% CI) |                                     | Relative effect (95% CI)  | № of participants (studies) | Quality of the evidence (GRADE) | Comments |
|-----------------------------|----------------------------------------|-------------------------------------|---------------------------|-----------------------------|---------------------------------|----------|
|                             | Risk with placebo                      | Risk with Ketoconazole              |                           |                             |                                 |          |
| Short-term (<90d) mortality | Study population                       |                                     | RR 1.02<br>(0.72 to 1.46) | 234<br>(1 RCT)              | ⊕⊕⊕○<br>MODERATE <sup>1</sup>   |          |
|                             | 342 per 1000                           | <b>349 per 1000</b><br>(246 to 499) |                           |                             |                                 |          |
|                             | Low                                    |                                     |                           |                             |                                 |          |
|                             | 190 per 1000                           | <b>194 per 1000</b><br>(137 to 277) |                           |                             |                                 |          |
| Severe adverse effects      | Study population                       |                                     | RR 1.25<br>(0.74 to 2.12) | 234<br>(1 RCT)              | ⊕⊕⊕○<br>MODERATE <sup>1</sup>   |          |
|                             | 171 per 1000                           | <b>214 per 1000</b><br>(126 to 362) |                           |                             |                                 |          |
|                             | Low                                    |                                     |                           |                             |                                 |          |
|                             | 20 per 1000                            | <b>25 per 1000</b><br>(15 to 42)    |                           |                             |                                 |          |
|                             | Study population                       |                                     |                           |                             |                                 |          |
|                             | 450 per 1000                           | <b>459 per 1000</b><br>(324 to 657) |                           |                             |                                 |          |
|                             | High                                   |                                     |                           |                             |                                 |          |
|                             | 240 per 1000                           | <b>300 per 1000</b><br>(178 to 509) |                           |                             |                                 |          |

\*The risk in the intervention group (and its 95% confidence interval) is based on the assumed risk in the comparison group and the relative effect of the intervention (and its 95% CI).

CI: Confidence interval; RR: Risk ratio

**GRADE Working Group grades of evidence**

**High quality:** We are very confident that the true effect lies close to that of the estimate of the effect

**Moderate quality:** We are moderately confident in the effect estimate: The true effect is likely to be close to the estimate of the effect, but there is a possibility that it is substantially different

**Low quality:** Our confidence in the effect estimate is limited: The true effect may be substantially different from the estimate of the effect

**Very low quality:** We have very little confidence in the effect estimate: The true effect is likely to be substantially different from the estimate of effect

1. Wide range of 95%CI due to a limited number of patients

## CQ13-11 Summary of findings:

**Lisofylline compared to placebo for adult ARDS**

Patient or population: ARDS

Intervention: Lisofylline

Comparison: placebo

| Outcomes                    | Anticipated absolute effects* (95% CI) |                                     | Relative effect (95% CI)         | № of participants (studies) | Quality of the evidence (GRADE) | Comments |
|-----------------------------|----------------------------------------|-------------------------------------|----------------------------------|-----------------------------|---------------------------------|----------|
|                             | Risk with placebo                      | Risk with Lisofylline               |                                  |                             |                                 |          |
|                             | <b>Study population</b>                |                                     |                                  |                             |                                 |          |
|                             | 244 per 1000                           | <b>319 per 1000</b><br>(212 to 483) |                                  |                             |                                 |          |
|                             | <b>Low</b>                             |                                     |                                  |                             |                                 |          |
| Short-term (<90d) mortality | 190 per 1000                           | <b>249 per 1000</b><br>(165 to 376) | <b>RR 1.31</b><br>(0.87 to 1.98) | 235<br>(1 RCT)              | ⊕⊕⊕○<br>MODERATE 1              |          |
|                             | <b>High</b>                            |                                     |                                  |                             |                                 |          |
|                             | 450 per 1000                           | <b>590 per 1000</b><br>(392 to 891) |                                  |                             |                                 |          |
| Severe adverse effects      | <b>Study population</b>                |                                     | ---                              | ---                         | ---                             |          |
|                             | ---                                    | ---                                 |                                  |                             |                                 |          |

\*The risk in the intervention group (and its 95% confidence interval) is based on the assumed risk in the comparison group and the relative effect of the intervention (and its 95% CI).

CI: Confidence interval; RR: Risk ratio

**GRADE Working Group grades of evidence**

**High quality:** We are very confident that the true effect lies close to that of the estimate of the effect

**Moderate quality:** We are moderately confident in the effect estimate: The true effect is likely to be close to the estimate of the effect, but there is a possibility that it is substantially different

**Low quality:** Our confidence in the effect estimate is limited: The true effect may be substantially different from the estimate of the effect

**Very low quality:** We have very little confidence in the effect estimate: The true effect is likely to be substantially different from the estimate of effect

1. Wide range of 95%CI due to a limited number of patients

**CQ13:****Question: Should the following drugs be used to treat adult patients with ARDS?**

(inhaled nitric oxide (NO), inhaled / intravenous  $\beta_2$  stimulant, granulocyte macrophage colony-stimulating factor (GM-CSF), prostaglandin E<sub>1</sub> (PGE<sub>1</sub>), statin, surfactant, activated protein C (APC), N-acetylcysteine (NAC), and ketoconazole or lisofylline)

**CQ13-01 Inhaled nitric oxide compared with placebo for adult patients with ARDS**

| Quality assessment          |                   |                      |               |              |                      |                      | No of patients                |                    | Effect                 |                                               | Quality          | Importance |
|-----------------------------|-------------------|----------------------|---------------|--------------|----------------------|----------------------|-------------------------------|--------------------|------------------------|-----------------------------------------------|------------------|------------|
| No of studies               | Study design      | Risk of bias         | Inconsistency | Indirectness | Imprecision          | Other considerations | Inhaled nitric oxide for ARDS | placebo            | Relative (95% CI)      | Absolute (95% CI)                             |                  |            |
| Short-term (<90d) mortality |                   |                      |               |              |                      |                      |                               |                    |                        |                                               |                  |            |
| 7                           | Randomized trials | Serious <sup>1</sup> | Not serious   | Not serious  | Serious <sup>2</sup> | None                 | 99 per 384 (25.8%)            | 71 per 315 (22.5%) | RR 1.18 (0.91 to 1.52) | 41 more per 1000 (from 20 fewer to 117 more)  | ⊕⊕⊖⊖<br>LOW      | CRITICAL   |
|                             |                   |                      |               |              |                      |                      |                               | 19.0%              |                        | 34 more per 1000 (from 17 fewer to 99 more)   |                  |            |
|                             |                   |                      |               |              |                      |                      |                               | 45.0%              |                        | 81 more per 1000 (from 40 fewer to 234 more)  |                  |            |
| Severe adverse events       |                   |                      |               |              |                      |                      |                               |                    |                        |                                               |                  |            |
| 2                           | Randomized trials | Not serious          | Not serious   | Not serious  | Serious <sup>2</sup> | None                 | 17 per 312 (5.4%)             | 7 per 250 (2.8%)   | RR 1.90 (0.78 to 4.66) | 25 more per 1000 (from 6 fewer to 102 more)   | ⊕⊕⊕⊖<br>MODERATE | CRITICAL   |
|                             |                   |                      |               |              |                      |                      |                               | 2.0%               |                        | 18 more per 1000 (from 4 fewer to 73 more)    |                  |            |
|                             |                   |                      |               |              |                      |                      |                               | 24.0%              |                        | 216 more per 1000 (from 53 fewer to 878 more) |                  |            |

CI: Confidence interval; RR: Risk ratio

1. There is a high risk of bias in the blinding procedure
2. Wide range of 95%CI due to a limited number of patients

CQ13-02 Inhaled beta<sub>2</sub> stimulant compared with placebo for adult patients with ARDS

| Quality assessment          |                   |              |               |              |                      |                      | No of patients                               |                    | Effect                 |                                                | Quality                       | Importance |
|-----------------------------|-------------------|--------------|---------------|--------------|----------------------|----------------------|----------------------------------------------|--------------------|------------------------|------------------------------------------------|-------------------------------|------------|
| No of studies               | Study design      | Risk of bias | Inconsistency | Indirectness | Imprecision          | Other considerations | Inhaled beta <sub>2</sub> stimulant for ARDS | placebo            | Relative (95% CI)      | Absolute (95% CI)                              |                               |            |
| Short-term (<90d) mortality |                   |              |               |              |                      |                      |                                              |                    |                        |                                                |                               |            |
| 1                           | Randomized trials | Not serious  | Not serious   | Not serious  | Serious <sup>1</sup> | None                 | 37 per 152 (24.3%)                           | 24 per 130 (18.5%) | RR 1.32 (0.83 to 2.08) | 59 more per 1000 (from 31 fewer to 199 more)   | ⊕⊕⊕⊖<br>MODERATE <sup>1</sup> | CRITICAL   |
|                             |                   |              |               |              |                      |                      |                                              | 19.0%              |                        | 61 more per 1000 (from 32 fewer to 205 more)   |                               |            |
|                             |                   |              |               |              |                      |                      |                                              | 45.0%              |                        | 144 more per 1000 (from 77 fewer to 486 more)  |                               |            |
| Severe adverse events       |                   |              |               |              |                      |                      |                                              |                    |                        |                                                |                               |            |
| 1                           | Randomized trials | Not serious  | Not serious   | Not serious  | Serious <sup>1</sup> | None                 | 12 per 152 (7.9%)                            | 4 per 130 (3.1%)   | RR 2.57 (0.85 to 7.76) | 48 more per 1000 (from 5 fewer to 208 more)    | ⊕⊕⊕⊖<br>MODERATE <sup>1</sup> | CRITICAL   |
|                             |                   |              |               |              |                      |                      |                                              | 2.0%               |                        | 31 more per 1000 (from 3 fewer to 135 more)    |                               |            |
|                             |                   |              |               |              |                      |                      |                                              | 24.0%              |                        | 377 more per 1000 (from 36 fewer to 1000 more) |                               |            |

CI: Confidence interval; RR: Risk ratio

1. Wide range of 95%CI due to a limited number of patients

**CQ13-03 Intravenous beta<sub>2</sub> stimulant compared with placebo for adult patients with ARDS**

| Quality assessment          |                   |              |                      |              |                      |                      | № of patients                                    |                    | Effect                  |                                                | Quality          | Importance |
|-----------------------------|-------------------|--------------|----------------------|--------------|----------------------|----------------------|--------------------------------------------------|--------------------|-------------------------|------------------------------------------------|------------------|------------|
| № of studies                | Study design      | Risk of bias | Inconsistency        | Indirectness | Imprecision          | Other considerations | Intravenous beta <sub>2</sub> stimulant for ARDS | placebo            | Relative (95% CI)       | Absolute (95% CI)                              |                  |            |
| Short-term (<90d) mortality |                   |              |                      |              |                      |                      |                                                  |                    |                         |                                                |                  |            |
| 2                           | Randomized trials | Not serious  | Serious <sup>1</sup> | Not serious  | Serious <sup>2</sup> | None                 | 66 per 180 (36.7%)                               | 52 per 184 (28.3%) | RR 1.16 (0.68 to 1.96)  | 45 more per 1000 (from 90 fewer to 271 more)   | ⊕⊕⊕⊖<br>LOW      | CRITICAL   |
|                             |                   |              |                      |              |                      |                      |                                                  | 19.0%              |                         | 30 more per 1000 (from 61 fewer to 182 more)   |                  |            |
|                             |                   |              |                      |              |                      |                      |                                                  | 45.0%              |                         | 72 more per 1000 (from 144 fewer to 432 more)  |                  |            |
| Severe adverse events       |                   |              |                      |              |                      |                      |                                                  |                    |                         |                                                |                  |            |
| 2                           | Randomized trials | Not serious  | Not serious          | Not serious  | Serious <sup>3</sup> | None                 | 28 per 181 (15.5%)                               | 4 per 184 (2.2%)   | RR 5.78 (1.34 to 24.92) | 104 more per 1000 (from 7 more to 520 more)    | ⊕⊕⊕⊖<br>MODERATE | CRITICAL   |
|                             |                   |              |                      |              |                      |                      |                                                  | 2.0%               |                         | 96 more per 1000 (from 7 more to 478 more)     |                  |            |
|                             |                   |              |                      |              |                      |                      |                                                  | 24.0%              |                         | 1000 more per 1000 (from 82 more to 1000 more) |                  |            |

CI: Confidence interval; RR: Risk ratio

1. High value of I<sup>2</sup>
2. Wide range of 95%CI due to a limited number of patients
3. The number of patients was smaller than optimal for the information size.



**CQ13-04 Granulocyte-macrophage colony-stimulating factor (GM-CSF) compared with placebo for adult patients with ARDS**

| Quality assessment          |                   |              |               |              |                      |                      | № of patients     |                   | Effect                 |                                                 | Quality                       | Importance |
|-----------------------------|-------------------|--------------|---------------|--------------|----------------------|----------------------|-------------------|-------------------|------------------------|-------------------------------------------------|-------------------------------|------------|
| № of studies                | Study design      | Risk of bias | Inconsistency | Indirectness | Imprecision          | Other considerations | GM-CSF for ARDS   | placebo           | Relative (95% CI)      | Absolute (95% CI)                               |                               |            |
| Short-term (<90d) mortality |                   |              |               |              |                      |                      |                   |                   |                        |                                                 |                               |            |
| 2                           | Randomized trials | Not serious  | Not serious   | Not serious  | Serious <sup>1</sup> | None                 | 13 per 74 (17.6%) | 17 per 74 (23.0%) | RR 0.76 (0.40 to 1.46) | 55 fewer per 1000 (from 106 more to 138 fewer)  | ⊕⊕⊕⊖<br>MODERATE <sub>1</sub> | CRITICAL   |
|                             |                   |              |               |              |                      |                      |                   | 19.0%             |                        | 46 fewer per 1000 (from 87 more to 114 fewer)   |                               |            |
|                             |                   |              |               |              |                      |                      |                   | 45.0%             |                        | 108 fewer per 1000 (from 207 more to 270 fewer) |                               |            |
| Severe adverse events       |                   |              |               |              |                      |                      |                   |                   |                        |                                                 |                               |            |
| 1                           | Randomized trials | Not serious  | Not serious   | Not serious  | Serious <sup>1</sup> | None                 | 11 per 64 (17.2%) | 13 per 66 (19.7%) | RR 0.87 (0.42 to 1.80) | 26 fewer per 1000 (from 114 fewer to 158 more)  | ⊕⊕⊕⊖<br>MODERATE <sub>1</sub> | CRITICAL   |
|                             |                   |              |               |              |                      |                      |                   | 2.0%              |                        | 3 fewer per 1000 (from 12 fewer to 16 more)     |                               |            |
|                             |                   |              |               |              |                      |                      |                   | 24.0%             |                        | 31 fewer per 1000 (from 139 fewer to 192 more)  |                               |            |

CI: Confidence interval; RR: Risk ratio

1. Wide range of 95%CI due to a limited number of patients

CQ13-05 Prostaglandin E<sub>1</sub> compared with placebo for adult patients with ARDS

| Quality assessment          |                   |              |               |              |                      |                      | No of patients                        |                     | Effect                 |                                                        | Quality          | Importance |
|-----------------------------|-------------------|--------------|---------------|--------------|----------------------|----------------------|---------------------------------------|---------------------|------------------------|--------------------------------------------------------|------------------|------------|
| No of studies               | Study design      | Risk of bias | Inconsistency | Indirectness | Imprecision          | Other considerations | Prostaglandin E <sub>1</sub> for ARDS | placebo             | Relative (95% CI)      | Absolute (95% CI)                                      |                  |            |
| Short-term (<90d) mortality |                   |              |               |              |                      |                      |                                       |                     |                        |                                                        |                  |            |
| 7                           | Randomized trials | Not serious  | Not serious   | Not serious  | Serious <sup>1</sup> | None                 | 162 per 418 (38.8%)                   | 140 per 368 (38.0%) | RR 1.07 (0.90 to 1.27) | <b>27 more per 1000</b><br>(from 38 fewer to 103 more) | ⊕⊕⊕⊖<br>MODERATE | CRITICAL   |
|                             |                   |              |               |              |                      |                      |                                       | 19.0%               |                        | <b>13 more per 1000</b><br>(from 19 fewer to 51 more)  |                  |            |
|                             |                   |              |               |              |                      |                      |                                       | 45.0%               |                        | <b>32 more per 1000</b><br>(from 45 fewer to 122 more) |                  |            |
| Severe adverse events       |                   |              |               |              |                      |                      |                                       |                     |                        |                                                        |                  |            |
| 4                           | Randomized trials | Not serious  | Not serious   | Not serious  | Serious <sup>1</sup> | None                 | 112 per 256 (43.8%)                   | 39 per 242 (16.1%)  | RR 2.07 (1.12 to 3.83) | <b>172 more per 1000</b><br>(from 19 more to 456 more) | ⊕⊕⊕⊖<br>MODERATE | CRITICAL   |
|                             |                   |              |               |              |                      |                      |                                       | 2.0%                |                        | <b>21 more per 1000</b><br>(from 2 more to 57 more)    |                  |            |
|                             |                   |              |               |              |                      |                      |                                       | 24.0%               |                        | <b>257 more per 1000</b><br>(from 29 more to 679 more) |                  |            |

CI: Confidence interval; RR: Risk ratio

- Wide range of 95%CI due to a limited number of patients

## CQ13-06 Statin compared with placebo for adult patients with ARDS

| Quality assessment          |                   |              |                      |              |                      |                      | № of patients       |                     | Effect                 |                                               | Quality                       | Importance |
|-----------------------------|-------------------|--------------|----------------------|--------------|----------------------|----------------------|---------------------|---------------------|------------------------|-----------------------------------------------|-------------------------------|------------|
| № of studies                | Study design      | Risk of bias | Inconsistency        | Indirectness | Imprecision          | Other considerations | Statin for ARDS     | placebo             | Relative (95% CI)      | Absolute (95% CI)                             |                               |            |
| Short-term (<90d) mortality |                   |              |                      |              |                      |                      |                     |                     |                        |                                               |                               |            |
| 2                           | Randomized trials | Not serious  | Serious <sup>1</sup> | Not serious  | Serious <sup>2</sup> | None                 | 165 per 638 (25.9%) | 166 per 646 (25.7%) | RR 0.98 (0.71 to 1.36) | 5 fewer per 1000 (from 75 fewer to 93 more)   | ⊕⊕⊖⊖<br>LOW <sup>1,2</sup>    | CRITICAL   |
|                             |                   |              |                      |              |                      |                      |                     | 19.0%               |                        | 4 fewer per 1000 (from 55 fewer to 68 more)   |                               |            |
|                             |                   |              |                      |              |                      |                      |                     | 45.0%               |                        | 9 fewer per 1000 (from 131 fewer to 162 more) |                               |            |
| Severe adverse events       |                   |              |                      |              |                      |                      |                     |                     |                        |                                               |                               |            |
| 2                           | Randomized trials | Not serious  | Not serious          | Not serious  | Serious <sup>2</sup> | None                 | 32 per 289 (11.1%)  | 23 per 310 (7.4%)   | RR 1.36 (0.69 to 2.67) | 27 more per 1000 (from 23 fewer to 124 more)  | ⊕⊕⊕⊖<br>MODERATE <sup>2</sup> | CRITICAL   |
|                             |                   |              |                      |              |                      |                      |                     | 2.0%                |                        | 7 more per 1000 (from 6 fewer to 33 more)     |                               |            |
|                             |                   |              |                      |              |                      |                      |                     | 24.0%               |                        | 86 more per 1000 (from 74 fewer to 401 more)  |                               |            |

CI: Confidence interval; RR: Risk ratio

1. Large I<sup>2</sup> value
2. Wide range of 95%CI due to a limited number of patients

## CQ13-07 Surfactant compared with placebo for adult patients with ARDS

| Quality assessment          |                   |                      |                           |              |                      |                      | No of patients       |                      | Effect                 |                                              | Quality                                          | Importance |
|-----------------------------|-------------------|----------------------|---------------------------|--------------|----------------------|----------------------|----------------------|----------------------|------------------------|----------------------------------------------|--------------------------------------------------|------------|
| No of studies               | Study design      | Risk of bias         | Inconsistency             | Indirectness | Imprecision          | Other considerations | Surfactant for ARDS  | placebo              | Relative (95% CI)      | Absolute (95% CI)                            |                                                  |            |
| Short-term (<90d) mortality |                   |                      |                           |              |                      |                      |                      |                      |                        |                                              |                                                  |            |
| 9                           | Randomized trials | Serious <sup>1</sup> | Not serious               | Not serious  | Serious <sup>2</sup> | None                 | 436 per 1455 (30.0%) | 438 per 1439 (30.4%) | RR 0.98 (0.88 to 1.09) | 6 fewer per 1000 (from 27 more to 37 fewer)  | ⊕⊕⊖<br>⊖<br>LOW <sup>1,2</sup>                   | CRITICAL   |
|                             |                   |                      |                           |              |                      |                      |                      | 19.0%                |                        | 4 fewer per 1000 (from 17 more to 23 fewer)  |                                                  |            |
|                             |                   |                      |                           |              |                      |                      |                      | 45.0%                |                        | 9 fewer per 1000 (from 41 more to 54 fewer)  |                                                  |            |
| Severe adverse events       |                   |                      |                           |              |                      |                      |                      |                      |                        |                                              |                                                  |            |
| 6                           | Randomized trials | Not serious          | Very serious <sup>3</sup> | Not serious  | Serious <sup>2</sup> | None                 | 333 per 1409 (23.6%) | 271 per 1392 (19.5%) | RR 1.44 (0.99 to 2.09) | 86 more per 1000 (from 2 fewer to 212 more)  | ⊕⊖⊖<br>⊖<br>VERYLOW <sup>2</sup><br><sub>3</sub> | CRITICAL   |
|                             |                   |                      |                           |              |                      |                      |                      | 2.0%                 |                        | 9 more per 1000 (from 0 fewer to 22 more)    |                                                  |            |
|                             |                   |                      |                           |              |                      |                      |                      | 24.0%                |                        | 106 more per 1000 (from 2 fewer to 262 more) |                                                  |            |

CI: Confidence interval; RR: Risk ratio

1. Significant numbers of high risk of bias in the blinding procedure
2. Wide range of 95%CI due to a limited number of patients
3. Large I<sup>2</sup> value

**CQ13-08 Activated protein C compared with placebo for adult patients with ARDS**

| Quality assessment          |                   |                      |               |              |                      |                      | № of patients                |                   | Effect                 |                                                 | Quality                           | Importance |
|-----------------------------|-------------------|----------------------|---------------|--------------|----------------------|----------------------|------------------------------|-------------------|------------------------|-------------------------------------------------|-----------------------------------|------------|
| № of studies                | Study design      | Risk of bias         | Inconsistency | Indirectness | Imprecision          | Other considerations | Activated protein C for ARDS | placebo           | Relative (95% CI)      | Absolute (95% CI)                               |                                   |            |
| Short-term (<90d) mortality |                   |                      |               |              |                      |                      |                              |                   |                        |                                                 |                                   |            |
| 2                           | Randomized trials | Not serious          | Not serious   | Not serious  | Serious <sup>1</sup> | None                 | 7 per 70 (10.0%)             | 12 per 76 (15.8%) | RR 0.64 (0.21 to 1.95) | 57 fewer per 1000 (from 125 fewer to 150 more)  | ⊕⊕⊕<br>⊖<br>MODERATE <sup>1</sup> | CRITICAL   |
|                             |                   |                      |               |              |                      |                      |                              | 19.0%             |                        | 68 fewer per 1000 (from 150 fewer to 181 more)  |                                   |            |
|                             |                   |                      |               |              |                      |                      |                              | 45.0%             |                        | 162 fewer per 1000 (from 356 fewer to 428 more) |                                   |            |
| Severe adverse events       |                   |                      |               |              |                      |                      |                              |                   |                        |                                                 |                                   |            |
| 2                           | Randomized trials | Serious <sup>2</sup> | Not serious   | Not serious  | Serious <sup>1</sup> | None                 | 14 per 70 (20.0%)            | 20 per 76 (26.3%) | RR 0.78 (0.43 to 1.40) | 58 fewer per 1000 (from 105 more to 150 fewer)  | ⊕⊕⊖<br>⊖<br>LOW <sup>1,2</sup>    | CRITICAL   |
|                             |                   |                      |               |              |                      |                      |                              | 2.0%              |                        | 4 fewer per 1000 (from 8 more to 11 fewer)      |                                   |            |
|                             |                   |                      |               |              |                      |                      |                              | 24.0%             |                        | 53 fewer per 1000 (from 96 more to 137 fewer)   |                                   |            |

CI: Confidence interval; RR: Risk ratio

- Wide range of 95%CI due to a limited number of patients
- There is a high risk of bias in the selection and blinding procedure

**CQ13-09 N-acetylcysteine compared with placebo for adult patients with ARDS**

| Quality assessment          |                   |              |               |              |                      |                      | № of patients             |                   | Effect                 |                                                | Quality                          | Importance |
|-----------------------------|-------------------|--------------|---------------|--------------|----------------------|----------------------|---------------------------|-------------------|------------------------|------------------------------------------------|----------------------------------|------------|
| № of studies                | Study design      | Risk of bias | Inconsistency | Indirectness | Imprecision          | Other considerations | N-acetylcysteine for ARDS | placebo           | Relative (95% CI)      | Absolute (95% CI)                              |                                  |            |
| Short-term (<90d) mortality |                   |              |               |              |                      |                      |                           |                   |                        |                                                |                                  |            |
| 4                           | Randomized trials | Not serious  | Not serious   | Not serious  | Serious <sup>1</sup> | None                 | 34 per 90 (37.8%)         | 40 per 90 (44.4%) | RR 0.89 (0.63 to 1.25) | 49 fewer per 1000 (from 111 more to 164 fewer) | ⊕⊕⊕⊖<br>MODERATE<br><sup>1</sup> | CRITICAL   |
|                             |                   |              |               |              |                      |                      |                           | 19.0%             |                        | 21 fewer per 1000 (from 48 more to 70 fewer)   |                                  |            |
|                             |                   |              |               |              |                      |                      |                           | 45.0%             |                        | 49 fewer per 1000 (from 113 more to 167 fewer) |                                  |            |

CI: Confidence interval; RR: Risk ratio

1. Wide range of 95%CI due to a limited number of patients

**CQ13-10 Ketoconazole compared with placebo for adult patients with ARDS**

| Quality assessment          |                   |              |               |              |                      |                      | № of patients         |                    | Effect                 |                                              | Quality                           | Importance |
|-----------------------------|-------------------|--------------|---------------|--------------|----------------------|----------------------|-----------------------|--------------------|------------------------|----------------------------------------------|-----------------------------------|------------|
| № of studies                | Study design      | Risk of bias | Inconsistency | Indirectness | Imprecision          | Other considerations | Ketoconazole for ARDS | placebo            | Relative (95% CI)      | Absolute (95% CI)                            |                                   |            |
| Short-term (<90d) mortality |                   |              |               |              |                      |                      |                       |                    |                        |                                              |                                   |            |
| 1                           | Randomized trials | Not serious  | Not serious   | Not serious  | Serious <sup>1</sup> | None                 | 41 per 117 (35.0%)    | 40 per 117 (34.2%) | RR 1.02 (0.72 to 1.46) | 7 more per 1000 (from 96 fewer to 157 more)  | ⊕⊕⊕<br>⊖<br>MODERATE <sup>1</sup> | CRITICAL   |
|                             |                   |              |               |              |                      |                      |                       | 19.0%              |                        | 4 more per 1000 (from 53 fewer to 87 more)   |                                   |            |
|                             |                   |              |               |              |                      |                      |                       | 45.0%              |                        | 9 more per 1000 (126 fewer to 207 more)      |                                   |            |
| Severe adverse events       |                   |              |               |              |                      |                      |                       |                    |                        |                                              |                                   |            |
| 1                           | Randomized trials | Not serious  | Not serious   | Not serious  | Serious <sup>1</sup> | None                 | 25 per 117 (21.4%)    | 20 per 117 (17.1%) | RR 1.25 (0.74 to 2.12) | 43 more per 1000 (from 44 fewer to 191 more) | ⊕⊕⊕<br>⊖<br>MODERATE <sup>1</sup> | CRITICAL   |
|                             |                   |              |               |              |                      |                      |                       | 2.0%               |                        | 5 more per 1000 (from 5 fewer to 22 more)    |                                   |            |
|                             |                   |              |               |              |                      |                      |                       | 24.0%              |                        | 60 more per 1000 (from 62 fewer to 269 more) |                                   |            |

CI: Confidence interval; RR: Risk ratio

1. Wide range of 95%CI due to a limited number of patients

**CQ13-11 Lisofylline compared with placebo for adult patients with ARDS**

| Quality assessment          |                   |              |               |              |                      |                      | No of patients       |                    | Effect                 |                                               | Quality                          | Importance |
|-----------------------------|-------------------|--------------|---------------|--------------|----------------------|----------------------|----------------------|--------------------|------------------------|-----------------------------------------------|----------------------------------|------------|
| No of studies               | Study design      | Risk of bias | Inconsistency | Indirectness | Imprecision          | Other considerations | Lisofylline for ARDS | placebo            | Relative (95% CI)      | Absolute (95% CI)                             |                                  |            |
| Short-term (<90d) mortality |                   |              |               |              |                      |                      |                      |                    |                        |                                               |                                  |            |
| 1                           | Randomized trials | Not serious  | Not serious   | Not serious  | Serious <sup>1</sup> | None                 | 37 per 116 (31.9%)   | 29 per 119 (24.4%) | RR 1.31 (0.87 to 1.98) | 76 more per 1000 (from 32 fewer to 239 more)  | ⊕⊕⊕⊖<br>MODERATE<br><sub>1</sub> | CRITICAL   |
|                             |                   |              |               |              |                      |                      |                      | 19.0%              |                        | 59 more per 1000 (from 25 fewer to 186 more)  |                                  |            |
|                             |                   |              |               |              |                      |                      |                      | 45.0%              |                        | 140 more per 1000 (from 59 fewer to 441 more) |                                  |            |

CI: Confidence interval; RR: Risk ratio

1. Wide range of 95%CI due to a limited number of patients



**Evidence-to-Decision Table**

**CQ13 : SHOULD THE FOLLOWING DRUGS BE USED FOR ADULT PATIENTS WITH ARDS?**  
 (inhaled nitric oxide (NO), inhaled/ intravenous beta<sub>2</sub> stimulant, granulocyte macrophage colony-stimulating factor (GM-CSF), prostaglandin E<sub>1</sub> (PGE<sub>1</sub>), statin, surfactant, activated protein C (APC), N-acetylcysteine (NAC), ketoconazole, and lisofylline)

PATIENTS: ADULT PATIENTS WITH ARDS

INTERVENTION: DRUG  
 (inhaled nitric oxide (NO), inhaled/ intravenous beta<sub>2</sub> stimulant, granulocyte macrophage colony-stimulating factor (GM-CSF), prostaglandin E<sub>1</sub> (PGE<sub>1</sub>), statin, surfactant, activated protein C (APC), N-acetylcysteine (NAC), ketoconazole and lisofylline)

| CRITERIA                                         | JUDGEMENTS                                                                                                                                                                                                                                                                                                                                                                                                                                                            | RESEARCH EVIDENCE                                                                                                                                                                                                                                                                                                                                                                                                                                                                                                                                                                                                                                                                                                                                                                                                                                                                                                                                                                                                                                                                                                                                                                                                                                                                                                                                                                                                                                                                                                                                                                                        | ADDITIONAL CONSIDERATION |                     |                                   |                                                  |          |             |                            |          |                  |         |                     |                                   |                                                  |          |                  |                       |          |                  |         |                     |                                   |                                                  |          |             |                            |          |                  |  |
|--------------------------------------------------|-----------------------------------------------------------------------------------------------------------------------------------------------------------------------------------------------------------------------------------------------------------------------------------------------------------------------------------------------------------------------------------------------------------------------------------------------------------------------|----------------------------------------------------------------------------------------------------------------------------------------------------------------------------------------------------------------------------------------------------------------------------------------------------------------------------------------------------------------------------------------------------------------------------------------------------------------------------------------------------------------------------------------------------------------------------------------------------------------------------------------------------------------------------------------------------------------------------------------------------------------------------------------------------------------------------------------------------------------------------------------------------------------------------------------------------------------------------------------------------------------------------------------------------------------------------------------------------------------------------------------------------------------------------------------------------------------------------------------------------------------------------------------------------------------------------------------------------------------------------------------------------------------------------------------------------------------------------------------------------------------------------------------------------------------------------------------------------------|--------------------------|---------------------|-----------------------------------|--------------------------------------------------|----------|-------------|----------------------------|----------|------------------|---------|---------------------|-----------------------------------|--------------------------------------------------|----------|------------------|-----------------------|----------|------------------|---------|---------------------|-----------------------------------|--------------------------------------------------|----------|-------------|----------------------------|----------|------------------|--|
| <b>PROBLEM</b>                                   | <input type="radio"/> No<br><input type="radio"/> Probably no<br><input checked="" type="radio"/> Probably yes<br><input type="radio"/> Yes<br>-----<br><input type="radio"/> Varies<br><input type="radio"/> Don't know                                                                                                                                                                                                                                              | The pathogenesis of ARDS is non-cardiogenic pulmonary edema with increased permeability caused by nonspecific inflammation in the pulmonary alveolar space (1). A number of factors including alveolar epithelial injury, increased pulmonary vascular resistance due to hypoxic pulmonary vasoconstriction, ventilation-perfusion mismatch and endogenous surfactant dysfunction are associated with the pathogenesis of ARDS. Therefore, a number of drugs have been investigated to treat ARDS including inhaled nitric oxide (NO) (2) as a pulmonary vasodilator, aerosolized/ intravenous β <sub>2</sub> stimulants (3-6) to resolve pulmonary edema, granulocyte-macrophage colony stimulating factor (GM-CSF) (7, 8) promoting growth of alveolar macrophages and alveolar epithelial cells, prostaglandin E <sub>1</sub> (PGE <sub>1</sub> ) (9, 10) as an anti-inflammatory agent, 3-hydroxy-3-methylglutaryl (HMG-CoA) reductase inhibitors including statin (11, 12), the antifungal drug ketoconazole (13, 14), lisofylline (15, 16), activated protein C (APC) (17, 18) which has anticoagulant and anti-inflammatory properties, and N-acetylcysteine (NAC) with antioxidant effects and exogenous surfactant supplementation to improve endogenous surfactant dysfunction. These agents have variable domestic availability, cost, and safety. If these agents are clinically indicated for the treatment of patients with ARDS, off-label use is mandatory in Japan. Due to the very limited number of effective agents for the treatment of ARDS, the priority of this problem is high. |                          |                     |                                   |                                                  |          |             |                            |          |                  |         |                     |                                   |                                                  |          |                  |                       |          |                  |         |                     |                                   |                                                  |          |             |                            |          |                  |  |
| <b>DESIRABLE AND UNDESIRABLE EVENTS</b>          | <p><b>What is the overall certainty of the evidence of events?</b></p> <input checked="" type="radio"/> Very low<br><input type="radio"/> Low<br><input type="radio"/> Moderate<br><input type="radio"/> High<br>-----<br><input type="radio"/> No included studies                                                                                                                                                                                                   | <p><b>The relative importance or values of the main outcomes of interest:</b></p> <p><b>CQ13-01 inhaled NO</b></p> <table border="1"> <thead> <tr> <th>Outcome</th> <th>Relative importance</th> <th>Certainty of the evidence (GRADE)</th> </tr> </thead> <tbody> <tr> <td>Mortality (short term)<br/><small>(NOTE1)</small></td> <td>CRITICAL</td> <td>⊕⊕⊖⊖<br/>LOW</td> </tr> <tr> <td>Significant adverse events</td> <td>CRITICAL</td> <td>⊕⊕⊕⊖<br/>MODERATE</td> </tr> </tbody> </table> <p><b>CQ13-02 inhaled β<sub>2</sub> stimulant</b></p> <table border="1"> <thead> <tr> <th>Outcome</th> <th>Relative importance</th> <th>Certainty of the evidence (GRADE)</th> </tr> </thead> <tbody> <tr> <td>Mortality (short term)<br/><small>(NOTE1)</small></td> <td>CRITICAL</td> <td>⊕⊕⊕⊖<br/>MODERATE</td> </tr> <tr> <td>Severe adverse events</td> <td>CRITICAL</td> <td>⊕⊕⊕⊖<br/>MODERATE</td> </tr> </tbody> </table> <p><b>CQ13-03 intravenous β<sub>2</sub> stimulant</b></p> <table border="1"> <thead> <tr> <th>Outcome</th> <th>Relative importance</th> <th>Certainty of the evidence (GRADE)</th> </tr> </thead> <tbody> <tr> <td>Mortality (short term)<br/><small>(NOTE1)</small></td> <td>CRITICAL</td> <td>⊕⊕⊖⊖<br/>LOW</td> </tr> <tr> <td>Significant adverse events</td> <td>CRITICAL</td> <td>⊕⊕⊕⊖<br/>MODERATE</td> </tr> </tbody> </table>                                                                                                                                                                                                                                   | Outcome                  | Relative importance | Certainty of the evidence (GRADE) | Mortality (short term)<br><small>(NOTE1)</small> | CRITICAL | ⊕⊕⊖⊖<br>LOW | Significant adverse events | CRITICAL | ⊕⊕⊕⊖<br>MODERATE | Outcome | Relative importance | Certainty of the evidence (GRADE) | Mortality (short term)<br><small>(NOTE1)</small> | CRITICAL | ⊕⊕⊕⊖<br>MODERATE | Severe adverse events | CRITICAL | ⊕⊕⊕⊖<br>MODERATE | Outcome | Relative importance | Certainty of the evidence (GRADE) | Mortality (short term)<br><small>(NOTE1)</small> | CRITICAL | ⊕⊕⊖⊖<br>LOW | Significant adverse events | CRITICAL | ⊕⊕⊕⊖<br>MODERATE |  |
| Outcome                                          | Relative importance                                                                                                                                                                                                                                                                                                                                                                                                                                                   | Certainty of the evidence (GRADE)                                                                                                                                                                                                                                                                                                                                                                                                                                                                                                                                                                                                                                                                                                                                                                                                                                                                                                                                                                                                                                                                                                                                                                                                                                                                                                                                                                                                                                                                                                                                                                        |                          |                     |                                   |                                                  |          |             |                            |          |                  |         |                     |                                   |                                                  |          |                  |                       |          |                  |         |                     |                                   |                                                  |          |             |                            |          |                  |  |
| Mortality (short term)<br><small>(NOTE1)</small> | CRITICAL                                                                                                                                                                                                                                                                                                                                                                                                                                                              | ⊕⊕⊖⊖<br>LOW                                                                                                                                                                                                                                                                                                                                                                                                                                                                                                                                                                                                                                                                                                                                                                                                                                                                                                                                                                                                                                                                                                                                                                                                                                                                                                                                                                                                                                                                                                                                                                                              |                          |                     |                                   |                                                  |          |             |                            |          |                  |         |                     |                                   |                                                  |          |                  |                       |          |                  |         |                     |                                   |                                                  |          |             |                            |          |                  |  |
| Significant adverse events                       | CRITICAL                                                                                                                                                                                                                                                                                                                                                                                                                                                              | ⊕⊕⊕⊖<br>MODERATE                                                                                                                                                                                                                                                                                                                                                                                                                                                                                                                                                                                                                                                                                                                                                                                                                                                                                                                                                                                                                                                                                                                                                                                                                                                                                                                                                                                                                                                                                                                                                                                         |                          |                     |                                   |                                                  |          |             |                            |          |                  |         |                     |                                   |                                                  |          |                  |                       |          |                  |         |                     |                                   |                                                  |          |             |                            |          |                  |  |
| Outcome                                          | Relative importance                                                                                                                                                                                                                                                                                                                                                                                                                                                   | Certainty of the evidence (GRADE)                                                                                                                                                                                                                                                                                                                                                                                                                                                                                                                                                                                                                                                                                                                                                                                                                                                                                                                                                                                                                                                                                                                                                                                                                                                                                                                                                                                                                                                                                                                                                                        |                          |                     |                                   |                                                  |          |             |                            |          |                  |         |                     |                                   |                                                  |          |                  |                       |          |                  |         |                     |                                   |                                                  |          |             |                            |          |                  |  |
| Mortality (short term)<br><small>(NOTE1)</small> | CRITICAL                                                                                                                                                                                                                                                                                                                                                                                                                                                              | ⊕⊕⊕⊖<br>MODERATE                                                                                                                                                                                                                                                                                                                                                                                                                                                                                                                                                                                                                                                                                                                                                                                                                                                                                                                                                                                                                                                                                                                                                                                                                                                                                                                                                                                                                                                                                                                                                                                         |                          |                     |                                   |                                                  |          |             |                            |          |                  |         |                     |                                   |                                                  |          |                  |                       |          |                  |         |                     |                                   |                                                  |          |             |                            |          |                  |  |
| Severe adverse events                            | CRITICAL                                                                                                                                                                                                                                                                                                                                                                                                                                                              | ⊕⊕⊕⊖<br>MODERATE                                                                                                                                                                                                                                                                                                                                                                                                                                                                                                                                                                                                                                                                                                                                                                                                                                                                                                                                                                                                                                                                                                                                                                                                                                                                                                                                                                                                                                                                                                                                                                                         |                          |                     |                                   |                                                  |          |             |                            |          |                  |         |                     |                                   |                                                  |          |                  |                       |          |                  |         |                     |                                   |                                                  |          |             |                            |          |                  |  |
| Outcome                                          | Relative importance                                                                                                                                                                                                                                                                                                                                                                                                                                                   | Certainty of the evidence (GRADE)                                                                                                                                                                                                                                                                                                                                                                                                                                                                                                                                                                                                                                                                                                                                                                                                                                                                                                                                                                                                                                                                                                                                                                                                                                                                                                                                                                                                                                                                                                                                                                        |                          |                     |                                   |                                                  |          |             |                            |          |                  |         |                     |                                   |                                                  |          |                  |                       |          |                  |         |                     |                                   |                                                  |          |             |                            |          |                  |  |
| Mortality (short term)<br><small>(NOTE1)</small> | CRITICAL                                                                                                                                                                                                                                                                                                                                                                                                                                                              | ⊕⊕⊖⊖<br>LOW                                                                                                                                                                                                                                                                                                                                                                                                                                                                                                                                                                                                                                                                                                                                                                                                                                                                                                                                                                                                                                                                                                                                                                                                                                                                                                                                                                                                                                                                                                                                                                                              |                          |                     |                                   |                                                  |          |             |                            |          |                  |         |                     |                                   |                                                  |          |                  |                       |          |                  |         |                     |                                   |                                                  |          |             |                            |          |                  |  |
| Significant adverse events                       | CRITICAL                                                                                                                                                                                                                                                                                                                                                                                                                                                              | ⊕⊕⊕⊖<br>MODERATE                                                                                                                                                                                                                                                                                                                                                                                                                                                                                                                                                                                                                                                                                                                                                                                                                                                                                                                                                                                                                                                                                                                                                                                                                                                                                                                                                                                                                                                                                                                                                                                         |                          |                     |                                   |                                                  |          |             |                            |          |                  |         |                     |                                   |                                                  |          |                  |                       |          |                  |         |                     |                                   |                                                  |          |             |                            |          |                  |  |
| <b>PROBLEM</b>                                   | <p><b>Is the problem a priority?</b></p> <input type="radio"/> No<br><input type="radio"/> Probably no<br><input checked="" type="radio"/> Probably yes<br><input type="radio"/> Yes<br>-----<br><input type="radio"/> Varies<br><input type="radio"/> Don't know                                                                                                                                                                                                     |                                                                                                                                                                                                                                                                                                                                                                                                                                                                                                                                                                                                                                                                                                                                                                                                                                                                                                                                                                                                                                                                                                                                                                                                                                                                                                                                                                                                                                                                                                                                                                                                          |                          |                     |                                   |                                                  |          |             |                            |          |                  |         |                     |                                   |                                                  |          |                  |                       |          |                  |         |                     |                                   |                                                  |          |             |                            |          |                  |  |
| <b>DESIRABLE AND UNDESIRABLE EVENTS</b>          | <p><b>Is there important uncertainty about or variability in how much people value the main outcomes?</b></p> <input type="radio"/> Important uncertainty or variability<br><input checked="" type="radio"/> Possibly important uncertainty or variability<br><input type="radio"/> Possibly no important uncertainty or variability<br><input type="radio"/> No important uncertainty or variability<br>-----<br><input type="radio"/> No known undesirable outcomes |                                                                                                                                                                                                                                                                                                                                                                                                                                                                                                                                                                                                                                                                                                                                                                                                                                                                                                                                                                                                                                                                                                                                                                                                                                                                                                                                                                                                                                                                                                                                                                                                          |                          |                     |                                   |                                                  |          |             |                            |          |                  |         |                     |                                   |                                                  |          |                  |                       |          |                  |         |                     |                                   |                                                  |          |             |                            |          |                  |  |
| <b>DESIRABLE AND UNDESIRABLE EVENTS</b>          | <p><b>How substantial are the desirable anticipated events?</b></p> <input type="radio"/> Trivial<br><input type="radio"/> Small<br><input type="radio"/> Moderate<br><input type="radio"/> Large<br>-----<br><input checked="" type="radio"/> Varies<br><input type="radio"/> Don't know                                                                                                                                                                             |                                                                                                                                                                                                                                                                                                                                                                                                                                                                                                                                                                                                                                                                                                                                                                                                                                                                                                                                                                                                                                                                                                                                                                                                                                                                                                                                                                                                                                                                                                                                                                                                          |                          |                     |                                   |                                                  |          |             |                            |          |                  |         |                     |                                   |                                                  |          |                  |                       |          |                  |         |                     |                                   |                                                  |          |             |                            |          |                  |  |
| <b>DESIRABLE AND UNDESIRABLE EVENTS</b>          | <p><b>How substantial are the undesirable anticipated events?</b></p> <input type="radio"/> Large<br><input type="radio"/> Moderate<br><input type="radio"/> Small<br><input type="radio"/> Trivial<br>-----<br><input checked="" type="radio"/> Varies<br><input type="radio"/> Don't know                                                                                                                                                                           |                                                                                                                                                                                                                                                                                                                                                                                                                                                                                                                                                                                                                                                                                                                                                                                                                                                                                                                                                                                                                                                                                                                                                                                                                                                                                                                                                                                                                                                                                                                                                                                                          |                          |                     |                                   |                                                  |          |             |                            |          |                  |         |                     |                                   |                                                  |          |                  |                       |          |                  |         |                     |                                   |                                                  |          |             |                            |          |                  |  |

Does the balance between desirable and undesirable effects favor the intervention or the comparison?

- Favors the comparison
- Probably favors the comparison
- Does not favor either the intervention or the comparison
- Probably favors the intervention
- Favors the intervention

- 
- Varies
- Don't know

**CQ13-04 granulocyte macrophage colony-stimulating factor (GM-CSF)**

| Outcome                                          | Relative importance | Certainty of the evidence (GRADE) |
|--------------------------------------------------|---------------------|-----------------------------------|
| Mortality (short term)<br><small>(NOTE1)</small> | CRITICAL            | ⊕⊕⊕⊖<br>MODERATE                  |
| Significant adverse events                       | CRITICAL            | ⊕⊕⊕⊖<br>MODERATE                  |

**CQ13-05 prostaglandin E<sub>1</sub>**

| Outcome                                          | Relative importance | Certainty of the evidence (GRADE) |
|--------------------------------------------------|---------------------|-----------------------------------|
| Mortality (short term)<br><small>(NOTE1)</small> | CRITICAL            | ⊕⊕⊕⊖<br>MODERATE                  |
| Significant adverse events                       | CRITICAL            | ⊕⊕⊕⊖<br>MODERATE                  |

**CQ13-06 statin**

| Outcome                                          | Relative importance | Certainty of the evidence (GRADE) |
|--------------------------------------------------|---------------------|-----------------------------------|
| Mortality (short term)<br><small>(NOTE1)</small> | CRITICAL            | ⊕⊕⊖⊖<br>LOW                       |
| Significant adverse events                       | CRITICAL            | ⊕⊕⊕⊖<br>MODERATE                  |

**CQ13-07 surfactant**

| Outcome                                          | Relative importance | Certainty of the evidence (GRADE) |
|--------------------------------------------------|---------------------|-----------------------------------|
| Mortality (short term)<br><small>(NOTE1)</small> | CRITICAL            | ⊕⊕⊖⊖<br>LOW                       |
| Significant adverse events                       | CRITICAL            | ⊕⊖⊖⊖<br>VERY LOW                  |

**CQ13-08 activated protein C**

| Outcome                                          | Relative importance | Certainty of the evidence (GRADE) |
|--------------------------------------------------|---------------------|-----------------------------------|
| Mortality (short term)<br><small>(NOTE1)</small> | CRITICAL            | ⊕⊕⊕⊖<br>MODERATE                  |
| Significant adverse events                       | CRITICAL            | ⊕⊕⊖⊖<br>LOW                       |

**CQ13-09 N-acetylcystein**

| Outcome                                          | Relative importance | Certainty of the evidence (GRADE) |
|--------------------------------------------------|---------------------|-----------------------------------|
| Mortality (short term)<br><small>(NOTE1)</small> | CRITICAL            | ⊕⊕⊕⊖<br>MODERATE                  |
| Significant adverse events                       | CRITICAL            | No studies                        |

**CQ13-10 ketoconazole**

| Outcome                                          | Relative importance | Certainty of the evidence (GRADE) |
|--------------------------------------------------|---------------------|-----------------------------------|
| Mortality (short term)<br><small>(NOTE1)</small> | CRITICAL            | ⊕⊕⊕⊖<br>MODERATE                  |
| Significant adverse events                       | CRITICAL            | ⊕⊕⊕⊖<br>MODERATE                  |

**CQ13-11 lisofylline**

| Outcome                                          | Relative importance | Certainty of the evidence (GRADE) |
|--------------------------------------------------|---------------------|-----------------------------------|
| Mortality (short term)<br><small>(NOTE1)</small> | CRITICAL            | ⊕⊕⊕⊖<br>MODERATE                  |
| Significant adverse events                       | CRITICAL            | No studies                        |

**Summary of findings:****CQ13-01 inhaled nitric oxide**

| Outcome                                          | Placebo    | Intervention                | Absolute effect (95% CI)                         | Relative risk (95% CI)           |
|--------------------------------------------------|------------|-----------------------------|--------------------------------------------------|----------------------------------|
| Mortality (short term)<br><small>(NOTE1)</small> | 225 / 1000 | 266 / 1000<br>(205 to 343)  | 41 more per 1000<br>(from 20 fewer to 117 more)  | <b>RR 1.18</b><br>(0.91 to 1.52) |
|                                                  | 190 / 1000 | 224 / 1000<br>(173 to 289)  | 34 more per 1000<br>(from 17 fewer to 99 more)   |                                  |
|                                                  | 450 / 1000 | 531 / 1000<br>(410 to 684)  | 81 more / 1000<br>(from 40 fewer to 234 more)    |                                  |
| Significant adverse events                       | 28 / 1000  | 53 / 1000<br>(22 to 130)    | 25 more per 1000<br>(from 6 fewer to 102 more)   | <b>RR 1.90</b><br>(0.78 to 4.66) |
|                                                  | 20 / 1000  | 38 / 1000<br>(16 to 93)     | 18 more per 1000<br>(from 4 fewer to 73 more)    |                                  |
|                                                  | 240 / 1000 | 456 / 1000<br>(187 to 1000) | 216 more per 1000<br>(from 53 fewer to 878 more) |                                  |

Summary : inhaled nitric oxide had no effect on mortality (short) or the rate of significant adverse events. Certainty of the evidence 「LOW」

**CQ13-02 inhaled  $\beta_2$  agonist**

| Outcome                                          | Placebo    | Intervention                | Absolute effect (95% CI)                          | Relative risk (95% CI)           |
|--------------------------------------------------|------------|-----------------------------|---------------------------------------------------|----------------------------------|
| Mortality (short term)<br><small>(NOTE1)</small> | 185 / 1000 | 244 / 1000<br>(153 to 384)  | 59 more per 1000<br>(from 31 fewer to 199 more)   | <b>RR 1.32</b><br>(0.83 to 2.08) |
|                                                  | 190 / 1000 | 251 / 1000<br>(158 to 395)  | 61 more per 1000<br>(from 32 fewer to 205 more)   |                                  |
|                                                  | 450 / 1000 | 594 / 1000<br>(374 to 936)  | 144 more per 1000<br>(from 77 fewer to 486 more)  |                                  |
| Significant adverse events                       | 31 / 1000  | 79 / 1000<br>(26 to 239)    | 48 more per 1000<br>(from 5 fewer to 208 more)    | <b>RR 2.57</b><br>(0.85 to 7.76) |
|                                                  | 20 / 1000  | 51 / 1000<br>(17 to 155)    | 31 more per 1000<br>(from 3 fewer to 135 more)    |                                  |
|                                                  | 240 / 1000 | 617 / 1000<br>(204 to 1000) | 377 more per 1000<br>(from 36 fewer to 1000 more) |                                  |

Summary : inhaled  $\beta_2$  agonist had no effect on mortality (short) or the rate of significant adverse events. Certainty of the evidence 「MODERATE」

**CQ13-03 intravenous  $\beta_2$  agonist**

| Outcome                           | Placebo    | Intervention                 | Absolute effect (95% CI)                          | Relative risk (95% CI)            |
|-----------------------------------|------------|------------------------------|---------------------------------------------------|-----------------------------------|
| Mortality (short term)<br>(NOTE1) | 283 / 1000 | 328 / 1000<br>(192 to 554)   | 45 more per 1000<br>(from 90 fewer to 271 more)   | <b>RR 1.16</b><br>(0.68 to 1.96)  |
|                                   | 190 / 1000 | 220 / 1000<br>(129 to 372)   | 30 more per 1000<br>(from 61 fewer to 182 more)   |                                   |
|                                   | 450 / 1000 | 522 / 1000<br>(306 to 882)   | 72 more per 1000<br>(from 144 fewer to 432 more)  |                                   |
| Significant adverse events        | 22 / 1000  | 126 / 1000<br>(29 to 542)    | 104 more per 1000<br>(from 7 more to 520 more)    | <b>RR 5.78</b><br>(1.34 to 24.92) |
|                                   | 20 / 1000  | 116 / 1000<br>(27 to 498)    | 96 more per 1000<br>(from 7 more to 478 more)     |                                   |
|                                   | 240 / 1000 | 1000 / 1000<br>(322 to 1000) | 1000 more per 1000<br>(from 82 more to 1000 more) |                                   |

Summary : intravenous  $\beta_2$  agonist had no effect on mortality (short), but significantly increased the rate of significant adverse events. Certainty of the evidence 「MODERATE」

**CQ13-04 granulocyte macrophage colony-stimulating factor (GM-CSF)**

| Outcome                           | Placebo    | Intervention               | Absolute effect (95% CI)                           | Relative risk (95% CI)           |
|-----------------------------------|------------|----------------------------|----------------------------------------------------|----------------------------------|
| Mortality (short term)<br>(NOTE1) | 230 / 1000 | 175 / 1000<br>(92 to 335)  | 55 fewer per 1000<br>(from 106 more to 138 fewer)  | <b>RR 0.76</b><br>(0.40 to 1.46) |
|                                   | 190 / 1000 | 144 / 1000<br>(76 to 277)  | 46 fewer per 1000<br>(from 87 more to 114 fewer)   |                                  |
|                                   | 450 / 1000 | 342 / 1000<br>(180 to 657) | 108 fewer per 1000<br>(from 207 more to 270 fewer) |                                  |
| Severe adverse events             | 197 / 1000 | 171 / 1000<br>(83 to 355)  | 26 fewer per 1000<br>(from 114 fewer to 158 more)  | <b>RR 0.87</b><br>(0.42 to 1.80) |
|                                   | 20 / 1000  | 17 / 1000<br>(8 to 36)     | 3 fewer per 1000<br>(from 12 fewer to 16 more)     |                                  |
|                                   | 240 / 1000 | 209 / 1000<br>(101 to 432) | 31 fewer per 1000<br>(from 139 fewer to 192 more)  |                                  |

Summary : GM-CSF had no effect on mortality (short) or the rate of significant adverse events. Certainty of the evidence 「MODERATE」

**CQ13-05 prostaglandin E<sub>1</sub>**

| Outcome                                   | Placebo    | Intervention               | Absolute effect<br>(95% CI)                     | Relative risk<br>(95% CI)        |
|-------------------------------------------|------------|----------------------------|-------------------------------------------------|----------------------------------|
| Mortality (short term) <sup>(NOTE1)</sup> | 380 / 1000 | 407 / 1000<br>(342 to 483) | 27 more per 1000<br>(from 38 fewer to 103 more) | <b>RR 1.07</b><br>(0.90 to 1.27) |
|                                           | 190 / 1000 | 203 / 1000<br>(171 to 241) | 13 more per 1000<br>(from 19 fewer to 51 more)  |                                  |
|                                           | 450 / 1000 | 482 / 1000<br>(405 to 572) | 32 more per 1000<br>(from 45 fewer to 122 more) |                                  |
| Significant adverse events                | 161 / 1000 | 334 / 1000<br>(180 to 617) | 172 more per 1000<br>(from 19 more to 456 more) | <b>RR 2.07</b><br>(1.12 to 3.83) |
|                                           | 20 / 1000  | 41 / 1000<br>(22 to 77)    | 21 more per 1000<br>(from 2 more to 57 more)    |                                  |
|                                           | 240 / 1000 | 497 / 1000<br>(269 to 919) | 257 more per 1000<br>(from 29 more to 679 more) |                                  |

Summary : prostaglandin E<sub>1</sub> had no effect on mortality (short), but significantly increased the rate of significant adverse events. Certainty of the evidence 「MODERATE」

**CQ13-06 statin**

| Outcome                                   | Placebo    | Intervention               | Absolute effect<br>(95% CI)                      | Relative risk<br>(95% CI)        |
|-------------------------------------------|------------|----------------------------|--------------------------------------------------|----------------------------------|
| Mortality (short term) <sup>(NOTE1)</sup> | 257 / 1000 | 252 / 1000<br>(182 to 349) | 5 fewer per 1000<br>(from 75 fewer to 93 more)   | <b>RR 0.98</b><br>(0.71 to 1.36) |
|                                           | 190 / 1000 | 186 / 1000<br>(135 to 258) | 4 fewer per 1000<br>(from 55 fewer to 68 more)   |                                  |
|                                           | 450 / 1000 | 441 / 1000<br>(320 to 612) | 9 fewer per 1000<br>(from 131 fewer to 162 more) |                                  |
| Significant adverse events                | 74 / 1000  | 101 / 1000<br>(51 to 198)  | 27 more per 1000<br>(from 23 fewer to 124 more)  | <b>RR 1.36</b><br>(0.69 to 2.67) |
|                                           | 20 / 1000  | 27 / 1000<br>(14 to 53)    | 7 more per 1000<br>(from 6 fewer to 33 more)     |                                  |
|                                           | 240 / 1000 | 326 / 1000<br>(166 to 641) | 86 more per 1000<br>(from 74 fewer to 401 more)  |                                  |

Summary : statin had no effect on mortality (short) or the rate of significant adverse events. Certainty of the evidence 「LOW」

**CQ13-07 surfactant**

| Outcome                                   | Placebo    | Intervention               | Absolute effect<br>(95% CI)                     | Relative risk<br>(95% CI)        |
|-------------------------------------------|------------|----------------------------|-------------------------------------------------|----------------------------------|
| Mortality (short term) <sup>(NOTE1)</sup> | 304 / 1000 | 298 / 1000<br>(268 to 332) | 6 fewer per 1000<br>(from 27 more to 37 fewer)  | <b>RR 0.98</b><br>(0.88 to 1.09) |
|                                           | 190 / 1000 | 186 / 1000<br>(167 to 207) | 4 fewer per 1000<br>(from 17 more to 23 fewer)  |                                  |
|                                           | 450 / 1000 | 441 / 1000<br>(396 to 491) | 9 fewer per 1000<br>(from 41 more to 54 fewer)  |                                  |
| Significant adverse events                | 195 / 1000 | 280 / 1000<br>(193 to 407) | 86 more per 1000<br>(from 2 fewer to 212 more)  | <b>RR 1.44</b><br>(0.99 to 2.09) |
|                                           | 20 / 1000  | 29 / 1000<br>(20 to 42)    | 9 more per 1000<br>(from 0 fewer to 22 more)    |                                  |
|                                           | 240 / 1000 | 346 / 1000<br>(238 to 502) | 106 more per 1000<br>(from 2 fewer to 262 more) |                                  |

Summary : surfactant had no effect on mortality (short) or the rate of significant adverse events. Certainty of the evidence 「VERY LOW」

**CQ13-08 activated protein C**

| Outcome                                          | Placebo    | Intervention               | Absolute effect (95% CI)                           | Relative risk (95% CI)           |
|--------------------------------------------------|------------|----------------------------|----------------------------------------------------|----------------------------------|
| Mortality (short term)<br><small>(NOTE1)</small> | 158 / 1000 | 101 / 1000<br>(33 to 308)  | 57 fewer per 1000<br>(from 125 fewer to 150 more)  | <b>RR 0.64</b><br>(0.21 to 1.95) |
|                                                  | 190 / 1000 | 122 / 1000<br>(40 to 371)  | 68 fewer per 1000<br>(from 150 fewer to 181 more)  |                                  |
|                                                  | 450 / 1000 | 288 / 1000<br>(95 to 878)  | 162 fewer per 1000<br>(from 356 fewer to 428 more) |                                  |
| Significant adverse events                       | 263 / 1000 | 205 / 1000<br>(113 to 368) | 58 fewer per 1000<br>(from 105 more to 150 fewer)  | <b>RR 0.78</b><br>(0.43 to 1.40) |
|                                                  | 20 / 1000  | 16 / 1000<br>(9 to 28)     | 4 fewer per 1000<br>(from 8 more to 11 fewer)      |                                  |
|                                                  | 240 / 1000 | 187 / 1000<br>(103 to 336) | 53 more per 1000<br>(from 96 more to 137 fewer)    |                                  |

Summary : activated protein C had no effect on mortality (short) or the rate of significant adverse events. Certainty of the evidence 「MODERATE」

**CQ13-09 N-acetylcystein**

| Outcome                                          | Placebo    | Intervention               | Absolute effect (95% CI)                          | Relative risk (95% CI)           |
|--------------------------------------------------|------------|----------------------------|---------------------------------------------------|----------------------------------|
| Mortality (short term)<br><small>(NOTE1)</small> | 444 / 1000 | 396 / 1000<br>(280 to 556) | 49 fewer per 1000<br>(from 111 more to 164 fewer) | <b>RR 0.89</b><br>(0.63 to 1.25) |
|                                                  | 190 / 1000 | 169 / 1000<br>(120 to 238) | 21 fewer per 1000<br>(from 48 more to 70 fewer)   |                                  |
|                                                  | 450 / 1000 | 401 / 1000<br>(284 to 563) | 49 fewer per 1000<br>(from 113 more to 167 fewer) |                                  |
| Significant adverse events                       | No studies |                            |                                                   |                                  |

Summary N-acetylcystein had no effect on mortality (short). Certainty of the evidence 「MODERATE」

**CQ13-10 ketoconazole**

| Outcome                                          | Placebo    | Intervention            | Absolute effect (95% CI)                     | Relative risk (95% CI)           |
|--------------------------------------------------|------------|-------------------------|----------------------------------------------|----------------------------------|
| Mortality (short term)<br><small>(NOTE1)</small> | 342 / 1000 | 349 / 1000 (246 to 499) | 7 more per 1000 (from 96 fewer to 157 more)  | <b>RR 1.02</b><br>(0.72 to 1.46) |
|                                                  | 190 / 1000 | 194 / 1000 (137 to 277) | 4 more per 1000 (from 53 fewer to 87 more)   |                                  |
|                                                  | 450 / 1000 | 459 / 1000 (324 to 657) | 9 more per 1000 (from 126 fewer to 207 more) |                                  |
| Significant adverse events                       | 171 / 1000 | 214 / 1000 (126 to 362) | 43 more per 1000 (from 44 fewer to 191 more) | <b>RR 1.25</b><br>(0.74 to 2.12) |
|                                                  | 20 / 1000  | 25 / 1000 (15 to 42)    | 5 more per 1000 (from 5 fewer to 22 more)    |                                  |
|                                                  | 240 / 1000 | 300 / 1000 (178 to 509) | 60 more per 1000 (from 62 fewer to 269 more) |                                  |

Summary : ketoconazole had no effect on mortality (short) or the rate of significant adverse events. Certainty of the evidence 「MODERATE」

**CQ13-11 lisofylline**

| Outcome                                          | Placebo    | Intervention            | Absolute effect (95% CI)                      | Relative risk (95% CI)           |
|--------------------------------------------------|------------|-------------------------|-----------------------------------------------|----------------------------------|
| Mortality (short term)<br><small>(NOTE1)</small> | 244 / 1000 | 319 / 1000 (212 to 483) | 76 more per 1000 (from 32 fewer to 239 more)  | <b>RR 1.31</b><br>(0.87 to 1.98) |
|                                                  | 190 / 1000 | 249 / 1000 (165 to 376) | 59 more per 1000 (from 25 fewer to 186 more)  |                                  |
|                                                  | 450 / 1000 | 590 / 1000 (392 to 891) | 140 more per 1000 (from 59 fewer to 441 more) |                                  |
| Significant adverse events                       | No studies |                         |                                               |                                  |

Summary lisofylline had no effect on mortality (short). Certainty of the evidence 「MODERATE」

**RESOURCES REQUIRED**

How large are the resource requirements (costs)?

- Large costs
- Moderate costs
- Negligible costs and savings
- Moderate savings
- Large savings
- 
- Varies
- Don't know

Inhaled NO and aerosolized  $\beta_2$  stimulant require special equipment for administration. Intravenous  $\beta_2$  stimulant, PGE<sub>1</sub>, APC, NAC, and lisofylline require a minimal amount of special equipment for intravenous administration. GM-CSF requires a minimal amount of special equipment for intravenous and subcutaneous administration. Statin requires no special equipment for oral administration. Intra-tracheal administration of surfactant requires no special equipment. Ketoconazole requires special equipment for enteral administration through the stomach, duodenum or jejunum. These drugs incur an additional cost for purchase.

inhaled NO (not covered by the national health insurance system in Japan)  
 inhaled  $\beta_2$  stimulant 30 JPY/day (not covered by the national health insurance system in Japan)  
 intravenous  $\beta_2$  stimulant 160 yen/day (not covered by the national health insurance system in Japan)  
 GM-CSF (not sold in Japan)  
 PGE<sub>1</sub> ~ 10,000 JPY/day (not covered by national health insurance in Japan)  
 Statin 110 JPY/day (not covered by the national health insurance system in Japan)  
 Surfactant 92,000 JPY/day (not covered by the national health insurance system in Japan)

|                      |                                                                                                                                                                                                                                                                                                                                                    |                                                                                                                                                                                                                                                                                                                                                                                                                                                                                                                                                                                                                                                                                                                                                                                                                                                                                                                                                                                                                                                                                                                                                     |  |
|----------------------|----------------------------------------------------------------------------------------------------------------------------------------------------------------------------------------------------------------------------------------------------------------------------------------------------------------------------------------------------|-----------------------------------------------------------------------------------------------------------------------------------------------------------------------------------------------------------------------------------------------------------------------------------------------------------------------------------------------------------------------------------------------------------------------------------------------------------------------------------------------------------------------------------------------------------------------------------------------------------------------------------------------------------------------------------------------------------------------------------------------------------------------------------------------------------------------------------------------------------------------------------------------------------------------------------------------------------------------------------------------------------------------------------------------------------------------------------------------------------------------------------------------------|--|
|                      |                                                                                                                                                                                                                                                                                                                                                    | <p>APC<br/>system in Japan)                      1,280,000 JPY/day (not covered by the national health insurance)</p> <p>NAC<br/>Ketoconazole                              (not sold for intravenous administration in Japan)</p> <p>Lisofylline                                      (not sold in Japan)</p> <p>(not sold in Japan)</p>                                                                                                                                                                                                                                                                                                                                                                                                                                                                                                                                                                                                                                                                                                                                                                                                            |  |
|                      | <p>Does the cost effectiveness of the intervention favor the intervention or the comparison?</p> <p>○Favors the comparison<br/>●Probably favors the comparison<br/>○Does not favor either the intervention or the comparison<br/>○Probably favors the intervention<br/>○Favors the intervention<br/>-----<br/>○Varies<br/>○No included studies</p> | <p>Since the efficacy of these drugs has not been proven, overall costs will increase by the amount of the drug.</p>                                                                                                                                                                                                                                                                                                                                                                                                                                                                                                                                                                                                                                                                                                                                                                                                                                                                                                                                                                                                                                |  |
| <b>EQUITY</b>        | <p>What would be the impact on health equity?</p> <p>○Reduced<br/>○Probably reduced<br/>○Probably no impact<br/>●Probably increased<br/>○Increased<br/>-----<br/>○Varies<br/>○Don't know</p>                                                                                                                                                       | <ul style="list-style-type: none"> <li>Inhaled NO requires special medical facilities and equipment. Aerosolized <math>\beta_2</math> stimulant requires special equipment for administration during mechanical ventilation. GM-CSF, intravenous NAC, ketoconazole, and lisofylline are not available in Japan. Surfactant is generally not used for the treatment of adult patients. APC has not been widely used. Therefore, these eight drugs are likely to have a significant impact on health inequity.</li> <li>Intravenous <math>\beta_2</math> stimulant, PGE1, and statins are predicted to have a small effect on health inequity, since no special medical facilities or equipment are required.</li> </ul>                                                                                                                                                                                                                                                                                                                                                                                                                              |  |
| <b>ACCEPTABILITY</b> | <p>Is the option acceptable to key stakeholders?</p> <p>○No<br/>○Probably no<br/>○Probably yes<br/>○Yes<br/>-----<br/>●Varies<br/>○Don't know</p>                                                                                                                                                                                                  | <ul style="list-style-type: none"> <li>Inhaled NO has not been covered by the national health insurance system in Japan and requires special equipment. GM-CSF, intravenous NAC, ketoconazole, and lisofylline are not available in Japan. Surfactant and APC are very expensive and not widely used. Therefore, these seven drugs are not likely to be easily accepted by key stakeholders.</li> <li>Although aerosolized <math>\beta_2</math> stimulant is commonly used in intensive care, it may or may not be acceptable to key stakeholders, since special medical equipment is required during mechanical ventilation.</li> <li>Although Intravenous <math>\beta_2</math> stimulant is commonly used in intensive care, the use of intravenous <math>\beta_2</math> stimulant is unlikely to be accepted in general hospitals based on the need for strict circulatory system monitoring. It may or may not be accepted by key stakeholders.</li> <li>PGE1 and statin are likely to be accepted by key stakeholders since they are widely available in Japan.</li> </ul>                                                                     |  |
| <b>FEASIBILITY</b>   | <p>Is the intervention feasible implement?</p> <p>○No<br/>○Probably no<br/>○Probably yes<br/>○Yes<br/>-----<br/>●Varies<br/>○Don't know</p>                                                                                                                                                                                                        | <ul style="list-style-type: none"> <li>PGE<sub>1</sub> and APC can be administered intravenously, while statin is administered orally. The use of these drugs is feasible, since no special medical facilities or equipment are required.</li> <li>Intravenous <math>\beta_2</math> stimulant can be administered intravenously, but may require special equipment including intravenous infusion pumps. Therefore, it is unclear whether they will be accepted in all general hospitals.</li> <li>Inhaled NO is inhaled with a special device. Aerosolized <math>\beta_2</math> stimulant requires a special medical device, particularly during mechanical ventilation. Therefore, these two drugs cannot be used in all medical facilities.</li> <li>Because surfactant can be administered intra-tracheally, the use of surfactant is limited to special facilities where sufficient respiratory monitoring and management can be provided. It is not practical to use surfactant in all medical facilities.</li> <li>GM-CSF, NAC, ketoconazole, and lisofylline are not available in Japan. The use of these drugs is not feasible.</li> </ul> |  |



## Evidence-to-Decision Table

**CQ13 : SHOULD THE FOLLOWING DRUGS BE USED FOR ADULT PATIENTS WITH ARDS?**  
 (inhaled nitric oxide (NO), inhaled/ intravenous  $\beta_2$  stimulant, granulocyte macrophage colony-stimulating factor (GM-CSF), prostaglandin  $E_1$  ( $PGE_1$ ), statin, surfactant, activated protein C (APC), N-acetylcysteine (NAC), ketoconazole, and lisofylline)

| Balance of consequences | Undesirable consequences clearly outweigh desirable consequences in most settings | Undesirable consequences probably outweigh desirable consequences in most settings | The balance between desirable and undesirable consequences is closely balanced or uncertain | Desirable consequences probably outweigh undesirable consequences in most settings | Desirable consequences clearly outweigh undesirable consequences in most settings |
|-------------------------|-----------------------------------------------------------------------------------|------------------------------------------------------------------------------------|---------------------------------------------------------------------------------------------|------------------------------------------------------------------------------------|-----------------------------------------------------------------------------------|
| Judgement               | ○                                                                                 | ○                                                                                  | ●                                                                                           | ○                                                                                  | ○                                                                                 |

| Type of recommendation | Strong recommendation against the intervention | Conditional recommendation against the intervention | Conditional recommendation for either the intervention or the comparison | Conditional recommendation for the intervention |
|------------------------|------------------------------------------------|-----------------------------------------------------|--------------------------------------------------------------------------|-------------------------------------------------|
| Judgement              | ○                                              | ●                                                   | ○                                                                        | ○                                               |

|                       |                                                                                                                                                                                                                                                                                                                                                                                                                                                                                                                                                                                                                                                                                                                                                                                                                                                                                                                                                                                                                                                                                                                                                                                                                                                                                                                                                                                                                                                                                                                                                                                                                                                                                                                                                                                                                                                                                                                                                                                                                                                                                                                                                                                                                                                                                                                                                                                                                                                                                                                                                                                         |
|-----------------------|-----------------------------------------------------------------------------------------------------------------------------------------------------------------------------------------------------------------------------------------------------------------------------------------------------------------------------------------------------------------------------------------------------------------------------------------------------------------------------------------------------------------------------------------------------------------------------------------------------------------------------------------------------------------------------------------------------------------------------------------------------------------------------------------------------------------------------------------------------------------------------------------------------------------------------------------------------------------------------------------------------------------------------------------------------------------------------------------------------------------------------------------------------------------------------------------------------------------------------------------------------------------------------------------------------------------------------------------------------------------------------------------------------------------------------------------------------------------------------------------------------------------------------------------------------------------------------------------------------------------------------------------------------------------------------------------------------------------------------------------------------------------------------------------------------------------------------------------------------------------------------------------------------------------------------------------------------------------------------------------------------------------------------------------------------------------------------------------------------------------------------------------------------------------------------------------------------------------------------------------------------------------------------------------------------------------------------------------------------------------------------------------------------------------------------------------------------------------------------------------------------------------------------------------------------------------------------------------|
| <b>Recommendation</b> | <p><b>Recommendation:</b><br/> <b>We do not recommend using the following drugs to treat adult patients with ARDS (strength of recommendation “strong recommendation”).</b><br/> <b>GRADE 1B Inhaled/ intravenous <math>\beta_2</math> stimulant, prostaglandin <math>E_1</math> (<math>PGE_1</math>), activated protein C (APC), ketoconazole, and lisofylline (Quality of evidence “moderate”)</b><br/> <b>GRADE 1C Inhaled nitric oxide (NO) (Quality of evidence “low”)</b><br/> <b>GRADE 1D Surfactant (Quality of evidence “very low”)</b></p> <p><b>We do not suggest using the following drugs to treat adult patients with ARDS (strength of recommendation “weak recommendation”).</b><br/> <b>GRADE 2B granulocyte macrophage colony-stimulating factor (GM-CSF), N-acetylcysteine (NAC) (Quality of evidence “moderate”)</b><br/> <b>GRADE 2C Statin (Quality of evidence “low”)</b></p> <p>●<b>Supplementary conditions: These drugs are not approved for clinical use by the Japanese national health insurance system.</b></p>                                                                                                                                                                                                                                                                                                                                                                                                                                                                                                                                                                                                                                                                                                                                                                                                                                                                                                                                                                                                                                                                                                                                                                                                                                                                                                                                                                                                                                                                                                                                           |
| <b>Justification</b>  | <p><b>Clinical question:</b> Should the following drugs be used to treat adult patients with ARDS? (ref. Intervention)</p> <p><b>Patient or population :</b> Adult patients with ARDS</p> <p><b>Intervention :</b> inhaled nitric oxide (NO), inhaled/ intravenous <math>\beta_2</math> stimulant, granulocyte macrophage colony-stimulating factor (GM-CSF), prostaglandin <math>E_1</math> (<math>PGE_1</math>), statin, surfactant, activated protein C (APC), N-acetylcysteine (NAC), ketoconazole, and lisofylline</p> <p><b>Comparison :</b> placebo</p> <p><b>Outcomes:</b> Mortality (short term)<sup>Note 1</sup>, Significant adverse events</p> <p><b>Summary of the evidence:</b></p> <ol style="list-style-type: none"> <li>1. A total of 7 RCTs (699 patients) evaluating the efficacy of inhaled NO were selected in a systematic review. Meta-analysis demonstrated that inhaled NO is not associated with improvement in short-term (&lt;90 days) mortality (RR 1.18, 95%CI 0.91-1.52) or the rate of significant adverse events (RR 1.90, 95%CI 0.78-4.66).</li> <li>2. A total of 1 RCT (282 patients) evaluating the efficacy of inhaled <math>\beta_2</math> stimulant was selected in a systematic review. Meta-analysis demonstrated that inhaled <math>\beta_2</math> stimulant is not associated with an improvement in short-term (&lt;90 days) mortality (RR 1.32, 95%CI 0.83-2.08), or the rate of significant adverse events (RR 2.57, 95%CI 0.85-7.76).</li> <li>3. A total of 2 RCTs (365 patients) evaluating the efficacy of intravenous <math>\beta_2</math> stimulant were included in a systematic review. Meta-analysis showed that intravenous <math>\beta_2</math> stimulant is not associated with improvement in short-term (&lt;90 days) mortality (RR 1.16, 95%CI 0.68-1.96). The rate of significant adverse events with administration of intravenous <math>\beta_2</math> stimulant was significantly increased (RR 5.78, 95%CI 1.34-24.92).</li> <li>4. A total of 2 RCTs (148 patients) evaluating the efficacy of GM-CSF were selected for analysis in a systematic review. The meta-analysis showed that GM-CSF is not associated with an improvement in short-term (&lt;90 days) mortality (RR 0.76, 95%CI 0.40-1.46), or rate of significant adverse events (RR 0.87, 95%CI 0.42-1.80).</li> <li>5. A total of 8 RCTs (786 patients) evaluating the efficacy of <math>PGE_1</math> administration were included in a systematic review. The meta-analysis demonstrated that <math>PGE_1</math> is not associated with an</li> </ol> |

- improvement in short-term (<90 days) mortality (RR 1.07, 95%CI 0.90-1.27). However, PGE<sub>1</sub> is significantly associated with an increase in the rate of significant adverse events (RR 2.07, 95%CI 1.12-3.83).
6. A total of 2 RCTs (1,284 patients) evaluating the efficacy of statin were selected for analysis in a systematic review. The meta-analysis demonstrated that statin did not have beneficial effects in terms of short-term (<90 days) mortality (RR 0.98, 95%CI 0.71-1.36) or the rate of significant adverse events (RR 1.36, 95%CI 0.69-2.67).
  7. A total of 10 RCTs (2,894 patients) evaluating the efficacy of surfactant were included in a systematic review. The meta-analysis demonstrated that surfactant is not associated with an improvement in short-term (<90 days) mortality (RR 0.98, 95%CI 0.88-1.09), or rate of significant adverse events (RR 1.44, 95%CI 0.99-2.09).
  8. A total of 2 RCTs (146 patients) evaluating the efficacy of APC were selected for analysis in a systematic review. The meta-analysis demonstrated that APC had no beneficial effects on short-term (<90 days) mortality (RR 0.64, 95%CI 0.21-1.95), or the rate of significant adverse events (RR 0.78, 95%CI 0.43-1.40).
  9. A total of 4 RCTs (180 patients) evaluating the efficacy of NAC were included in a systematic review. The meta-analysis demonstrated that NAC is not associated with improvement in short-term (<90 days) mortality (RR 0.89, 95%CI 0.63-1.25). No RCT evaluated the rate of significant adverse events with the use of NAC.
  10. A total of 1 RCT (234 patients) evaluating the efficacy of ketoconazole was selected for analysis in a systematic review. The meta-analysis demonstrated that ketoconazole did not improve the short-term (<90 days) mortality (RR 1.02, 95%CI 0.72-1.46), or the rate of significant adverse events (RR 1.25, 95%CI 0.74-2.12).
  11. A total of 1 RCTs (235 patients) evaluating the efficacy of lisofylline was selected in a systematic review. The meta-analysis demonstrated that lisofylline had beneficial effects in terms of short-term (<90 days) mortality (RR 1.31, 95%CI 0.87-1.98). No RCT evaluated the rate of significant adverse events associated with the use of lisofylline.

**Quality of evidence:**

1. Regarding inhaled nitric oxide, a majority of studies had a high risk for bias in blinding with regard to short-term (<90 days) mortality. The risk of bias for the occurrence of significant adverse events was not high. No inconsistency was observed in analysis of short-term (<90 days) mortality ( $I^2 = 0\%$ ) or significant adverse effects ( $I^2 = 0\%$ ). No indirectness was observed. Since the number of patients was smaller than the optimal information size and therefore the 95%CI was large, the imprecision of this meta-analysis was high. Publication bias could not be determined because of the small number of reported studies.
2. Regarding inhaled  $\beta_2$  stimulant, no risk of bias was observed. Inconsistency could not be evaluated because of the small number of reported studies. No indirectness was observed. Since the number of patients was smaller than the optimal information size and therefore 95%CI was large, the imprecision of this meta-analysis was high. Publication bias could not be determined because of the small number of reported studies.
3. Regarding intravenous  $\beta_2$  stimulant, no risk of bias was observed. Inconsistency ranged from moderate to severe (short-term (<90 days) mortality,  $I^2 = 68\%$ ; severe adverse events,  $I^2 = 49\%$ , respectively). No indirectness was observed. Since the number of patients was smaller than the optimal information size and therefore 95%CI was large, the imprecision of this meta-analysis was high. Publication bias could not be determined because of the small number of reported studies.
4. Regarding GM-CSF, no risk of bias was observed. No inconsistency was observed in short-term (<90 days) mortality ( $I^2 = 0\%$ ). Inconsistency in significant adverse events could not be determined because of the small number of reported studies (only one RCT included). No indirectness was observed. Since the number of patients was smaller than the optimal information size and therefore 95%CI was large, the imprecision of this meta-analysis was high. Publication bias could not be determined because of the small number of reported studies.
5. Regarding PGE<sub>1</sub>, no risk of bias was observed. No inconsistency was observed in short-term (<90 days) mortality ( $I^2 = 0\%$ ), while moderate inconsistency was observed in significant adverse events ( $I^2 = 45\%$ ). No indirectness was observed. Since the number of patients was smaller than the optimal information size and therefore 95%CI was large, the imprecision of this meta-analysis was high. Publication bias could not be determined because of the small number of reported studies.
6. Regarding statin, no risk of bias was observed. Moderate to severe inconsistency was observed (short-term (<90 days) mortality,  $I^2 = 65\%$ ; significant adverse events,  $I^2 = 35\%$ , respectively). No indirectness was observed. Since the number of patients was smaller than the optimal information size and therefore 95%CI was large, the imprecision of this meta-analysis was high. Publication bias could not be determined because of the small number of reported studies.
7. Regarding surfactant, high risk of bias was observed in blinding of short-term (<90 days) mortality. No risk of bias was observed in the rate of significant adverse events. No inconsistency was observed in short-term (<90 days) mortality ( $I^2 = 0\%$ ), while severe inconsistency was observed in the rate of significant adverse events ( $I^2 = 71\%$ ). No indirectness was observed. Since the number of patients was smaller than the optimal information size and therefore 95%CI was large, the imprecision of this meta-analysis was high. Publication bias could not be determined because of the small number of reported

|                                                 |                                                                                                                                                                                                                                                                                                                                                                                                                                                                                                                                                                                                                                                                                                                                                                                                                                                                                                                                                                                                                                                                                                                                                                                                                                                                                                                                                                                                                                                                                                                                                                                                                                                                                                                                                                                                                                                                                                                                                                                                                                                                                                                                                                                                                                                                                                                                                                                                                                                                                                                                                                                                                                                                                                                                                                                                                                                                                                                                                                                                                                                                                                                                                                                                                                                                                                                                                                                                                                                                                                                                                                                                                               |
|-------------------------------------------------|-------------------------------------------------------------------------------------------------------------------------------------------------------------------------------------------------------------------------------------------------------------------------------------------------------------------------------------------------------------------------------------------------------------------------------------------------------------------------------------------------------------------------------------------------------------------------------------------------------------------------------------------------------------------------------------------------------------------------------------------------------------------------------------------------------------------------------------------------------------------------------------------------------------------------------------------------------------------------------------------------------------------------------------------------------------------------------------------------------------------------------------------------------------------------------------------------------------------------------------------------------------------------------------------------------------------------------------------------------------------------------------------------------------------------------------------------------------------------------------------------------------------------------------------------------------------------------------------------------------------------------------------------------------------------------------------------------------------------------------------------------------------------------------------------------------------------------------------------------------------------------------------------------------------------------------------------------------------------------------------------------------------------------------------------------------------------------------------------------------------------------------------------------------------------------------------------------------------------------------------------------------------------------------------------------------------------------------------------------------------------------------------------------------------------------------------------------------------------------------------------------------------------------------------------------------------------------------------------------------------------------------------------------------------------------------------------------------------------------------------------------------------------------------------------------------------------------------------------------------------------------------------------------------------------------------------------------------------------------------------------------------------------------------------------------------------------------------------------------------------------------------------------------------------------------------------------------------------------------------------------------------------------------------------------------------------------------------------------------------------------------------------------------------------------------------------------------------------------------------------------------------------------------------------------------------------------------------------------------------------------------|
|                                                 | <p>studies.</p> <p>8. Regarding APC, no risk of bias was observed in short-term (&lt;90 days) mortality, while high risk of bias was observed in blinding and concealment of significant adverse events. Mild inconsistency was observed (short-term [&lt;90 days] mortality, <math>I^2 = 29\%</math>; severe adverse events, <math>I^2 = 1\%</math>, respectively). No indirectness was observed. Since the number of patients smaller than the optimal information size and therefore 95%CI was large, the imprecision of this meta-analysis was high. Publication bias could not be determined because of the small number of reported studies.</p> <p>9. Regarding NAC, no risk of bias was observed. No inconsistency was observed (short-term (&lt;90 days) mortality, <math>I^2 = 0\%</math>). No indirectness was observed. Since the number of patients was smaller than the optimal information size and therefore 95%CI was large, the imprecision of this meta-analysis was high. Publication bias could not be determined because of the small number of reported studies.</p> <p>10. Regarding ketoconazole, no serious risk of bias was observed. Inconsistency could not be determined because of the small number of reported studies (only one RCT included). No indirectness was observed. Since the number of patients was smaller than the optimal information size and therefore 95%CI was large, the imprecision of this meta-analysis was high. Publication bias could not be determined because of the small number of reported studies.</p> <p>11. Regarding lisofylline, no serious risk of bias was observed. Inconsistency could not be determined because of the small number of reported studies (only one RCT included). No indirectness was observed. Since the number of patients was smaller than the optimal information size and therefore 95%CI was large, the imprecision of this meta-analysis was high. Publication bias could not be determined because of the small number of reported studies.</p> <p><b>Judgement of benefit and harm, resources and cost:</b> Systematic review demonstrated that neither efficacy nor the rate of significant adverse effects was found for any drug except intravenous <math>\beta_2</math> stimulant and PGE<sub>1</sub>. The benefit was considered to be small compared to the increase in cost. However, intravenous <math>\beta_2</math> stimulant and PGE<sub>1</sub> are associated with an increase in the rate of significant adverse events. With these medications, the benefit was considered to be small compared to the increase in cost.</p> <p><b>Recommendations:</b><br/>We do not recommend using the following drugs to treat adult patients with ARDS (strength of recommendation "strong recommendation").<br/>GRADE 1B Inhaled/ intravenous <math>\beta_2</math> stimulant, prostaglandin E<sub>1</sub> (PGE<sub>1</sub>), activated protein C (APC), ketoconazole, and lisofylline (Quality of evidence "moderate")<br/>GRADE 1C Inhaled nitric oxide (NO) (Quality of evidence "low")<br/>GRADE 1D Surfactant (Quality of evidence "very low")</p> <p>We do not suggest using the following drugs to treat adult patients with ARDS (strength of recommendation "weak recommendation").<br/>GRADE 2B granulocyte macrophage colony-stimulating factor (GM-CSF), N-acetylcysteine (NAC) (Quality of evidence "moderate")<br/>GRADE 2C Statin (Quality of evidence "low")</p> <p><b>Additional Considerations:</b> These drugs are not approved for clinical use by the Japanese national health insurance system.</p> |
| <b>Subgroup considerations</b>                  | None                                                                                                                                                                                                                                                                                                                                                                                                                                                                                                                                                                                                                                                                                                                                                                                                                                                                                                                                                                                                                                                                                                                                                                                                                                                                                                                                                                                                                                                                                                                                                                                                                                                                                                                                                                                                                                                                                                                                                                                                                                                                                                                                                                                                                                                                                                                                                                                                                                                                                                                                                                                                                                                                                                                                                                                                                                                                                                                                                                                                                                                                                                                                                                                                                                                                                                                                                                                                                                                                                                                                                                                                                          |
| <b>Implementation considerations</b>            | <ul style="list-style-type: none"> <li>• Inhaled NO requires special facility and equipment.</li> <li>• Inhaled <math>\beta_2</math> stimulant requires uncommon equipment during mechanical ventilation.</li> <li>• GM-CSF, NAC, ketoconazole and lisofylline are uncommon drugs that are not available in Japan.</li> <li>• Surfactant is an uncommon drug in the treatment of adult patients.</li> <li>• APC is an uncommon drug.</li> <li>• Intravenous <math>\beta_2</math> stimulant, PGE<sub>1</sub> and statin do not require special facility or equipment.</li> </ul>                                                                                                                                                                                                                                                                                                                                                                                                                                                                                                                                                                                                                                                                                                                                                                                                                                                                                                                                                                                                                                                                                                                                                                                                                                                                                                                                                                                                                                                                                                                                                                                                                                                                                                                                                                                                                                                                                                                                                                                                                                                                                                                                                                                                                                                                                                                                                                                                                                                                                                                                                                                                                                                                                                                                                                                                                                                                                                                                                                                                                                               |
| <b>Monitoring and evaluation considerations</b> | Cardiorespiratory monitoring and blood testing are necessary to detect adverse events.                                                                                                                                                                                                                                                                                                                                                                                                                                                                                                                                                                                                                                                                                                                                                                                                                                                                                                                                                                                                                                                                                                                                                                                                                                                                                                                                                                                                                                                                                                                                                                                                                                                                                                                                                                                                                                                                                                                                                                                                                                                                                                                                                                                                                                                                                                                                                                                                                                                                                                                                                                                                                                                                                                                                                                                                                                                                                                                                                                                                                                                                                                                                                                                                                                                                                                                                                                                                                                                                                                                                        |
| <b>Research possibilities</b>                   | Because of a limited number of high-quality RCTs, large-scale, high-quality clinical trials are necessary to evaluate the efficacy of these medications.                                                                                                                                                                                                                                                                                                                                                                                                                                                                                                                                                                                                                                                                                                                                                                                                                                                                                                                                                                                                                                                                                                                                                                                                                                                                                                                                                                                                                                                                                                                                                                                                                                                                                                                                                                                                                                                                                                                                                                                                                                                                                                                                                                                                                                                                                                                                                                                                                                                                                                                                                                                                                                                                                                                                                                                                                                                                                                                                                                                                                                                                                                                                                                                                                                                                                                                                                                                                                                                                      |

**Note 1:** Short-term (<90 days) mortality indicates death within 90 days, which was analyzed as a main outcome in each study.

## References

1. Matthay MA, Ware LB, Zimmerman GA. The acute respiratory distress syndrome. *J Clin Invest* **122**(8): 2731-40, 2012. PMID 22850883
2. Adhikari NK, Burns KE, Friedrich JO, et al. Effect of nitric oxide on oxygenation and mortality in acute lung injury: systematic review and meta-analysis. *BMJ* **334**(7597): 779, 2007. PMID 17383982
3. Sakuma T, Okaniwa G, Nakada T, et al. Alveolar fluid clearance in the resected human lung. *Am J Respir Crit Care Med* **150**(2): 305-10,

1994. PMID 8049807
4. Basran GS, Hardy JG, Woo SP, et al. Beta-2-adrenoceptor agonists as inhibitors of lung vascular permeability to radiolabelled transferrin in the adult respiratory distress syndrome in man. *Eur J Nucl Med* **12**(8): 381-4, 1986. PMID 2878809
  5. Sartori C, Allemann Y, Duplain H, et al. Salmeterol for the prevention of high-altitude pulmonary edema. *N Engl J Med* **346**(21): 1631-6, 2002. PMID 12023995
  6. Atabai K, Ware LB, Snider ME, et al. Aerosolized beta(2)-adrenergic agonists achieve therapeutic levels in the pulmonary edema fluid of ventilated patients with acute respiratory failure. *Intensive Care Med* **28**(6): 705-11, 2002. PMID 12107675
  7. Trapnell BC, Whitsett JA. Gm-CSF regulates pulmonary surfactant homeostasis and alveolar macrophage-mediated innate host defense. *Annu Rev Physiol* **64**: 775-802, 2002. PMID 11826288
  8. Huffman Reed JA, Rice WR, Zsengeller ZK, et al. GM-CSF enhances lung growth and causes alveolar type II epithelial cell hyperplasia in transgenic mice. *Am J Physiol* **273**(4 Pt 1): L715-25, 1997. PMID 9357845
  9. Eierman DF, Yagami M, Erme SM, et al. Endogenously opsonized particles divert prostanoid action from lethal to protective in models of experimental endotoxemia. *Proc Natl Acad Sci U S A* **92**(7): 2815-9, 1995. PMID 7708730
  10. Rossetti RG, Brathwaite K, Zurier RB. Suppression of acute inflammation with liposome associated prostaglandin E1. *Prostaglandins* **48**(3): 187-95, 1994. PMID 7809384
  11. Terblanche M, Almog Y, Rosenson RS, et al. Statins: panacea for sepsis? *Lancet Infect Dis* **6**(4): 242-8, 2006. PMID 16554249
  12. Jacobson JR, Barnard JW, Grigoryev DN, et al. Simvastatin attenuates vascular leak and inflammation in murine inflammatory lung injury. *Am J Physiol Lung Cell Mol Physiol* **288**(6): L1026-32, 2005. PMID 15665042
  13. Lelcuk S, Huval WV, Valeri CR, et al. Inhibition of ischemia-induced thromboxane synthesis in man. *J Trauma* **24**(5): 393-6, 1984. PMID 6325720
  14. Williams JG, Maier RV. Ketoconazole inhibits alveolar macrophage production of inflammatory mediators involved in acute lung injury (adult respiratory distress syndrome). *Surgery* **112**(2): 270-7, 1992. PMID 1322565
  15. Bursten SL, Federighi D, Wald J, et al. Lisofylline causes rapid and prolonged suppression of serum levels of free fatty acids. *J Pharmacol Exp Ther* **284**(1): 337-45, 1998. PMID 9435196
  16. Rice GC, Rosen J, Weeks R, et al. CT-1501R selectively inhibits induced inflammatory monokines in human whole blood ex vivo. *Shock* **1**(4): 254-66, 1994. PMID 7735959
  17. Cornet AD, van Nieuw Amerongen GP, Beishuizen A, et al. Activated protein C in the treatment of acute lung injury and acute respiratory distress syndrome. *Expert Opin Drug Discov* **4**(3): 219-27, 2009. PMID 23489122
  18. Bernard GR, Vincent JL, Laterre PF, et al. Efficacy and safety of recombinant human activated protein C for severe sepsis. *N Engl J Med* **344**(10): 699-709, 2001. PMID 11236773
