# Supplementary material for: The clinical practice guideline for the management of ARDS in Japan
Source: PubMed Central journal article supplement (PMC5526253; doi:10.1186/s40560-017-0222-3), 2017-07-25
Supplement: 40560_2017_222_MOESM2_ESM.pdf [file 40560_2017_222_MOESM2_ESM.pdf]

## Role of each member, and financial and academic COI

|                                       | Systematic review        | Panel member              | Financial COI | Academic COI                                                                                                                           |
|---------------------------------------|--------------------------|---------------------------|---------------|----------------------------------------------------------------------------------------------------------------------------------------|
| ● Core members                        |                          |                           |               |                                                                                                                                        |
| Satoru Hashimoto                      | -                        | Chair person              | None          | Senior Editor, Journal of Intensive Care<br>JRS *1, ALI/ARDS clinical practice guideline member                                        |
| Masamitsu Sanui                       | -                        | CQ1-CQ13                  | None          | None                                                                                                                                   |
| Moritoki Egi                          | CQ1*,<br>CQ12*           | -                         | None          | JSICM*2, member for clinical practice guideline for sepsis<br>JSICM*2, member for clinical practice guideline for nutrition management |
| Sinichiro Ohshimo                     | CQ9*,<br>CQ11*,<br>CQ13* | CQ1-CQ8,<br>CQ10,<br>CQ12 | None          | None                                                                                                                                   |
| Junji Shiotsuka                       | CQ3                      | -                         | None          | None                                                                                                                                   |
| Ryutaro Seo                           | CQ2*, CQ4                | CQ1, CQ3,<br>CQ5-CQ13     | None          | None                                                                                                                                   |
| Ryoma Tanaka                          | CQ8                      | -                         | None          | None                                                                                                                                   |
| Yu Tanaka                             | CQ4, CQ10                | -                         | None          | None                                                                                                                                   |
| Yasuhiro Norisue                      | CQ5*, CQ6*               | -                         | None          | None                                                                                                                                   |
| Yoshiro Hayashi                       | CQ7                      | -                         | None          | None                                                                                                                                   |
| Eishu Nango                           | -                        | CQ1-CQ13                  | None          | Support member for developing clinical practice guideline, MIND*3<br>guideline center, JCQHC*4<br>Member of GRADE working group        |
| ● Systematic review committee members |                          |                           |               |                                                                                                                                        |
| Yoshitaka Aoki                        | CQ1,<br>CQ10*            | -                         | None          | None                                                                                                                                   |
| Kohkichi Andoh                        | CQ8                      | -                         | None          | None                                                                                                                                   |
| Yusuke Iizuka                         | CQ3*, CQ9                | -                         | None          | None                                                                                                                                   |
| Hitoshi Imaizumi                      | CQ7                      | -                         | None          | JSICM*2, member for clinical practice guideline for sepsis                                                                             |
| Satoshi Okamori                       | CQ5                      | -                         | None          | None                                                                                                                                   |
| Motoshi Kainuma                       | CQ1                      | -                         | None          | None                                                                                                                                   |
| Jun Kataoka                           | CQ6                      | -                         | None          | None                                                                                                                                   |
| Tetsuro Kamo                          | CQ4                      | -                         | None          | None                                                                                                                                   |
| Atsushi Kawaguchi                     | CQ2, CQ3,<br>CQ5, CQ8    | -                         | None          | None                                                                                                                                   |
| Junji Kumasawa                        | CQ2                      | -                         | None          | None                                                                                                                                   |
| Kiyoyasu Kurahashi                    | CQ5, CQ7                 | -                         | None          | None                                                                                                                                   |
| Kunihiko Kooguchi                     | CQ3                      | -                         | None          | None                                                                                                                                   |
| Yutaka Kondo                          | CQ2                      | -                         | None          | None                                                                                                                                   |
| Masaaki Sakuraya                      | CQ10*,<br>CQ11,<br>CQ13  | CQ4, CQ9                  | None          | None                                                                                                                                   |
| Akira Shimoyama                       | CQ12                     | -                         | None          | None                                                                                                                                   |
| So Suzuki                             | CQ12                     | -                         | None          | None                                                                                                                                   |
| Hiroyuki Suzuki                       | CQ6                      | -                         | None          | None                                                                                                                                   |
| Motohiro Sekino                       | CQ6, CQ11,<br>CQ13       | -                         | None          | None                                                                                                                                   |
| Mikio Nakajima                        | CQ9                      | -                         | None          | None                                                                                                                                   |
| Tetsuro Nishimura                     | CQ4                      | -                         | None          | None                                                                                                                                   |
| Tatsuma Fukuda                        | CQ1, CQ7*                | -                         | None          | None                                                                                                                                   |
| Jun Makino                            | CQ3, CQ9                 | -                         | None          | None                                                                                                                                   |
| Ryoichi Miyashita                     | CQ11,<br>CQ13            | -                         | None          | None                                                                                                                                   |
| Ryutaro Moriwaki                      | CQ12                     | -                         | None          | None                                                                                                                                   |
| Hideto Yasuda                         | CQ4*, CQ8*               | CQ2, CQ11                 | None          | None                                                                                                                                   |

|                                         |          |          |      |                                                                                                    |
|-----------------------------------------|----------|----------|------|----------------------------------------------------------------------------------------------------|
| Shigenori Yoshitake                     | CQ5      | -        | None | None                                                                                               |
| Yumi Yamashita                          | CQ1-CQ13 | -        | None | None                                                                                               |
| Yoshiko Nakagawa                        | CQ1-CQ13 | -        | None | None                                                                                               |
| Takaaki Suzuki                          | CQ1-CQ13 | -        | None | None                                                                                               |
| Toshiyuki Aokage                        | -        | -        | None | None                                                                                               |
| Kimitaka Tajimi                         | -        | -        | None | JSRCM *5 ARDS clinical practice guideline member                                                   |
| Hidemichi Yuasa                         | -        | -        | None | None                                                                                               |
| ● Panelists                             |          |          |      |                                                                                                    |
| Kazuya Ichikado                         | -        | CQ1-CQ13 | None | JRS *1ALI/ARDS clinical practice guideline member                                                  |
| Hideaki Imanaka                         | -        | CQ1-CQ13 | None | JRS *1ALI/ARDS clinical practice guideline member<br>JRS *1NPPV clinical practice guideline member |
| Ayumu Nozaki                            | -        | CQ1-CQ13 | None | None                                                                                               |
| Ryo Kozu                                | -        | CQ1-CQ13 | None | JSICM J-PAD *6 clinical practice guideline member                                                  |
| Takeshi Unoki                           | -        | CQ1-CQ13 | None | None                                                                                               |
| Yoshinori Takahashi                     | -        | CQ1-CQ13 | None | None                                                                                               |
| Akimichi Serita                         | -        | CQ1-CQ13 | None | None                                                                                               |
| Eriko Takezawa                          | -        | CQ1-CQ13 | None | None                                                                                               |
| ● External evaluation committee members |          |          |      |                                                                                                    |
| Morio Aihara                            | -        | -        | None | Member of GRADE working group                                                                      |
| Taku Yabuki                             | -        | -        | None | None                                                                                               |
| Takeo Nakayama                          | -        | -        | None | None                                                                                               |
| Toshio Fukuoka                          | -        | -        | None | None                                                                                               |

Eight panelists were recruited from public announcement. Four core members and two systematic review members also participated in panel conference as a panelist. If they participated in certain systematic review, he/she was replaced by other members as shown in the table.

- \*: Leader of each CQ's systematic review
- \*1: JRS, Japanese Respiratory Society
- \*2: JSICM, Japanese Society of Intensive Care Medicine
- \*3: MIND, Medical Information Network Distribution Service
- \*4: JCQHC, Japan Council for Quality Health Care
- \*5: JSRCM, J Japanese Society of Respiratory Care Medicine
- \*6: J-PAD, Japanese Pain, Agitation, and Delirium
